# Supplementary material for: Organocatalytic enantio- and diastereoselective synthesis of trifluoro-ethylamine allenoate derivatives containing axial and central chiralities
Source: Royal Society of Chemistry journal article supplement (doi:10.1039/d4cc03297g), 2024-01-01

## Supporting Information

### **Organocatalytic enantio- and diastereoselective synthesis of trifluoro-ethylamine allenoate derivatives containing axial and central chiralities**

Siyu Shi,<sup>a</sup> Mengyun Gu,<sup>a</sup> Danna Chen,<sup>d</sup> Ruya Li,<sup>b</sup> Zhiqiang Shen,<sup>ac</sup> Jinqi Huang,<sup>d\*</sup> Wenjin Yan<sup>a\*</sup>

*a. The Institute of Pharmacology, School of Basic Medical Sciences, Lanzhou University, Lanzhou 730000, China.*

*b. The Affiliated Hospital of Guangdong Medical University, Guangdong, China.*

*c. Lanzhou Institute of Chemical Physics, Chinese Academy of Sciences, Lanzhou Gansu, 730000, China.*

*d. Guangzhou First People's Hospital, South China University of Technology, Guangzhou, Guangdong, China.*

*Email: [evhjg@scut.edu.cn](mailto:evhjg@scut.edu.cn), [yanwj@lzu.edu.cn](mailto:yanwj@lzu.edu.cn).*

### **Table of Contents**

|                                                                                       |     |
|---------------------------------------------------------------------------------------|-----|
| 1.General Information.....                                                            | S2  |
| 2.References.....                                                                     | S2  |
| 3.Experimental Section.....                                                           | S2  |
| 4.General Procedure for the Synthesis of Compounds 3aa–3pa.....                       | S5  |
| 5.General Procedure for the Synthesis of Compounds 3ab–3ap.....                       | S6  |
| 6.General Procedure for the Synthesis of Compounds 4.....                             | S6  |
| 7.Analytical Data and HPLC Chromatogram of the Products.....                          | S7  |
| 8.Gram-scale asymmetric cycloaddition for the synthesis of 3ea and 3ah.....           | S36 |
| 9.Synthetic transformation of 3ea.....                                                | S38 |
| 10 One-pot synthesis of derivatized products 4.....                                   | S39 |
| 11.X-ray Structures of Compounds 3ba and 4ba.....                                     | S42 |
| 12.Copies of <sup>1</sup> H, <sup>19</sup> F, <sup>13</sup> C NMR and IR Spectra..... | S42 |

## 1. General Information

Reactions were monitored by thin layer chromatography (TLC), and compounds were visualized with a UV light at 254 nm and 365 nm. Column chromatography purifications were carried out using silica gel.  $^1\text{H}$ ,  $^{13}\text{C}$  and  $^{19}\text{F}$  NMR spectra were recorded on a Bruker (400 MHz) spectrometer in  $\text{CDCl}_3$  using tetramethylsilane (TMS) as internal standard. Data are presented as follows: chemical shift, integration, multiplicity (br = broad, s = singlet, d = doublet, t = triplet, q = quartet, m = multiplet) and coupling constant in Hertz (Hz). Mass peaks are identified by the corresponding  $m/z$  values. The infrared data is measured by thermo scientific NICOLET (is50 FT-IR). The ee values determination was carried out using chiral high-performance liquid chromatography (HPLC) with Daicel Chiralpak (IA-3, IC) column. Optical rotations were measured on a digital polarimeter and are reported as follows:  $[\alpha]_{\text{D}}^{\text{T}}$  (1 g/100 mL,  $\text{CHCl}_3$ ).

All solvents were obtained from commercial sources and were purified according to standard procedures. The starting materials, 1-alkynyl ketimines, and trifluoromethyl ketimines, were synthesized using the literature method.<sup>[1-2]</sup>

## 2. References

- [1] (a) X. Zhang, X. -X. Song and J. -Q. Ni, *Chem. Commun.*, 2024, **60**, 831-834; (b) J. Yang, Z. Wang, Z. He, G. Li, L. Hong, W. Sun and R. Wang, *Angew. Chem., Int. Ed.* 2020, **59**, 642.
- [2] D. Chen, Y. Deng, S. Sun, P. Jia, J. Huang, W. Yan, *Adv. Synth. Catal.*, 2023, **365**, 178–193.

## 3. Experimental Section

**Table S1** Evaluation of different types of catalysts.<sup>a</sup>

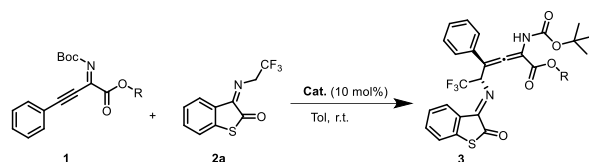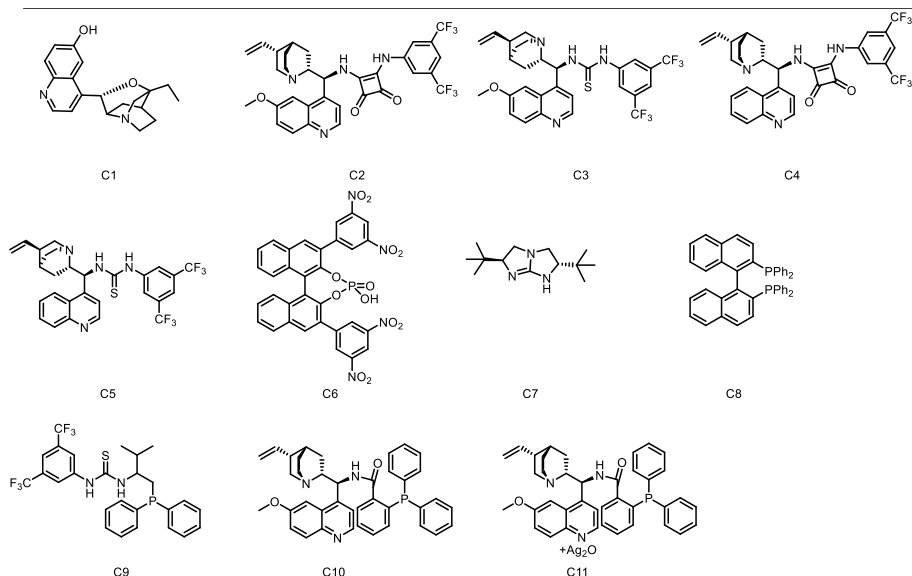

| Entry | solvent | catalyst   | time (h) | yield (%) <sup>b</sup> | ee (%) <sup>c</sup> |
|-------|---------|------------|----------|------------------------|---------------------|
| 1     | Tol     | <b>C1</b>  | 2.5      | 40                     | 18                  |
| 2     | Tol     | <b>C2</b>  | 5        | 50                     | racemic             |
| 3     | Tol     | <b>C3</b>  | 3        | mixture                | --                  |
| 4     | Tol     | <b>C4</b>  | 5        | 35                     | 16                  |
| 5     | Tol     | <b>C5</b>  | 4        | 40                     | 8                   |
| 6     | Tol     | <b>C6</b>  | 6        | mixture                | --                  |
| 7     | Tol     | <b>C7</b>  | 8        | 60                     | --                  |
| 8     | Tol     | <b>C8</b>  | 1.5      | 65                     | --                  |
| 9     | Tol     | <b>C9</b>  | 1.5      | 73                     | --                  |
| 10    | Tol     | <b>C10</b> | 3        | 70                     | racemic             |
| 11    | Tol     | <b>C11</b> | 3.5      | 72                     | racemic             |

<sup>a</sup> All reactions were performed with catalyst (0.01 mmol, 10 mol%), **1a** (0.10 mmol), **2a** (0.12 mmol) in toluene (1 mL) at rt, and the product *dr* values were determined by chiral phase HPLC or <sup>1</sup>H NMR and <sup>19</sup>F NMR (> 20:1 *dr*, in all cases). <sup>b</sup> Isolated yield. <sup>c</sup> Determined by chiral phase HPLC.

**Table S2 Optimization of the Reaction Conditions<sup>a</sup>**

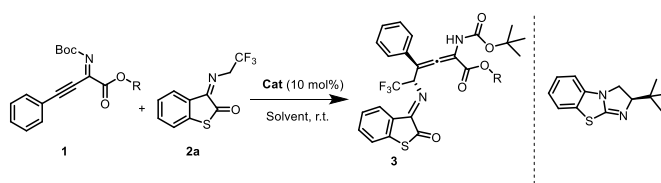

| Entry | solvent | time (min) | yield (%) <sup>b</sup> | ee (%) <sup>c</sup> |
|-------|---------|------------|------------------------|---------------------|
| 1     | DCM     | 60         | 75                     | 85                  |

|                 |         |     |    |    |
|-----------------|---------|-----|----|----|
| 2               | DCE     | 60  | 79 | 86 |
| 3               | PhCl    | 40  | 75 | 87 |
| 4               | TFT     | 30  | 86 | 82 |
| 5               | THF     | 30  | 78 | 87 |
| 6 <sup>d</sup>  | 2-MeTHF | 25  | 87 | 90 |
| 7 <sup>e</sup>  | MTBE    | 20  | 75 | 89 |
| 8               | EA      | 28  | 75 | 88 |
| 9 <sup>d</sup>  | 2-MeTHF | 40n | 73 | 90 |
| 10 <sup>e</sup> | 2-MeTHF | 80  | 65 | 88 |
| 11 <sup>f</sup> | 2-MeTHF | 95  | 62 | 86 |

<sup>a</sup> Unless otherwise noted, all reactions were performed with catalyst (0.01 mmol, 10 mol%), **1a** (0.10 mmol), **2a** (0.12 mmol) in solvent (1 mL) at rt, and the product *dr* values were determined by chiral phase HPLC or <sup>1</sup>H NMR and <sup>19</sup>F NMR (> 20:1 *dr*, in all cases). <sup>b</sup> Isolated yield. <sup>c</sup> Determined by chiral phase HPLC. <sup>d</sup> Performed at 0 °C. <sup>e</sup> Performed at -10 °C. <sup>f</sup> Performed at -20 °C.

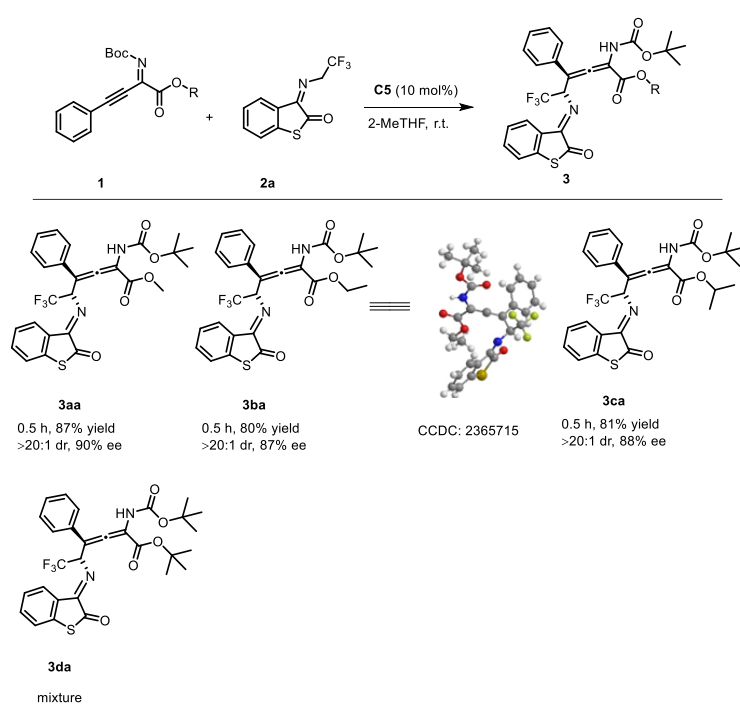

### Scheme S1 The limitation of PGs on 1-alkynyl ketimines.

Reaction conditions: **1** (0.10 mmol), **2a** (0.12 mmol), and catalyst **C5** (10 mol%) in 2-MeTHF (1 ml) at room temperature, the reaction time required for each substrate is given. The yields of the isolated products are reported. The ee and *dr* values were determined by HPLC or <sup>1</sup>H NMR and <sup>19</sup>F NMR. <sup>a</sup> Furnished at room temperature.

**Table S3** Optimization of the reaction conditions of trifluoromethyl-ketimine derived from *N*-Ac isatin<sup>a</sup>

| Entry | solvent | catalyst  | time (min) | yield (%) <sup>b</sup> | ee (%) <sup>c</sup> |
|-------|---------|-----------|------------|------------------------|---------------------|
| 1     | Tol     | <b>C1</b> | 50         | 75                     | 83                  |
| 2     | Tol     | <b>C2</b> | 80         | 72                     | 80                  |

|                 |         |           |    |    |    |
|-----------------|---------|-----------|----|----|----|
| 3               | Tol     | <b>C3</b> | 50 | 65 | 63 |
| 4               | Tol     | <b>C4</b> | 30 | 70 | 82 |
| 5               | Tol     | <b>C5</b> | 30 | 80 | 86 |
| 6               | Tol     | <b>C6</b> | 30 | 50 | 83 |
| 7               | Tol     | <b>C7</b> | 40 | 79 | 80 |
| 8               | Tol     | <b>C8</b> | 50 | 80 | 81 |
| 9               | DCM     | <b>C5</b> | 60 | 75 | 85 |
| 10              | DCE     | <b>C5</b> | 60 | 79 | 86 |
| 11              | PhCl    | <b>C5</b> | 40 | 75 | 87 |
| 12              | TFT     | <b>C5</b> | 30 | 86 | 82 |
| 13              | THF     | <b>C5</b> | 30 | 78 | 87 |
| 14 <sup>d</sup> | 2-MeTHF | <b>C5</b> | 60 | 82 | 88 |
| 15 <sup>e</sup> | MTBE    | <b>C5</b> | 20 | 60 | 85 |
| 16              | EA      | <b>C5</b> | 28 | 70 | 83 |
| 17 <sup>d</sup> | 2-MeTHF | <b>C5</b> | 40 | 75 | 86 |
| 18 <sup>e</sup> | 2-MeTHF | <b>C5</b> | 80 | 66 | 85 |
| 19 <sup>f</sup> | 2-MeTHF | <b>C5</b> | 95 | 60 | 86 |

<sup>a</sup> Unless otherwise noted, all reactions were performed with catalyst (0.01 mmol, 10 mol%), **1a** (0.10 mmol), **2a** (0.12 mmol) in solvent (1 mL) at rt, and the product *dr* values were determined by chiral phase HPLC or <sup>1</sup>H NMR and <sup>19</sup>F NMR (> 20:1 *dr*, in all cases). <sup>b</sup> Isolated yield. <sup>c</sup> Determined by chiral phase HPLC. <sup>d</sup> Performed at 0 °C. <sup>e</sup> Performed at -10 °C. <sup>f</sup> Performed at -20 °C.

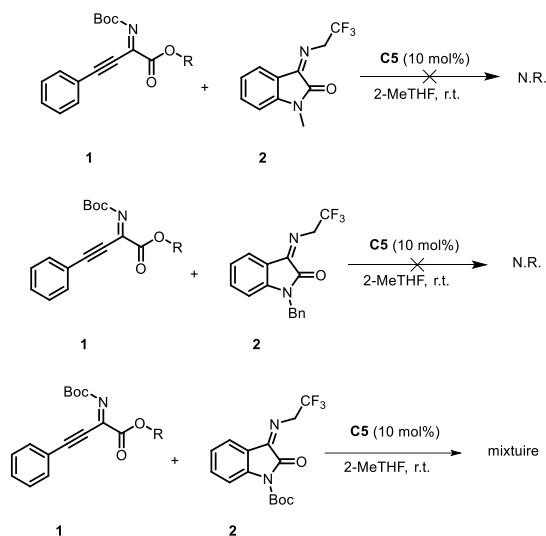

**Scheme S2** The failed reaction of trifluoromethyl-ketimines with isatin 1-alkynyl ketimines.

#### 4. General Procedure for the Synthesis of Compounds 3aa–3pa

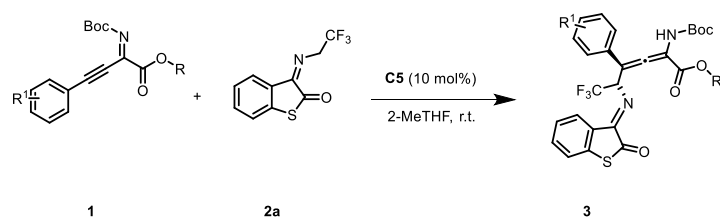

1-Alkynyl ketimines **1** (0.1 mmol) was added to a solution of catalyst **C5** (0.01 mmol,

10 mol%) and trifluoromethyl ketimine **2a** (0.12 mmol) in anhydrous 2-MeTHF (1.0 mL) at r.t, after completion (monitored by TLC), the reaction mixture was directly purified by flash column chromatography on silica gel (EA:PE = 1:50(v/v)) to obtain the title compounds **3aa-3pa**.

Racemates were prepared following the general procedure with 10 mol% 2,3-dihydrobenzo[*d*]imidazo[2,1-*b*]thiazole.

## 5. General Procedure for the Synthesis of Compounds **3ab-3ap**

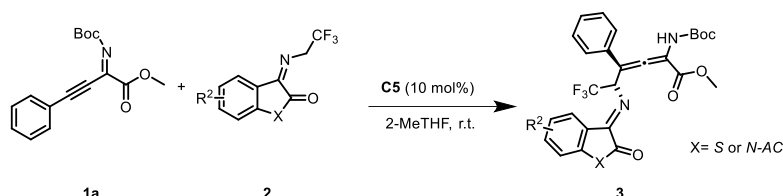

1-Alkynyl ketimines **1a** (0.1 mmol) was added to a solution of catalyst **C5** (0.01 mmol, 10 mol%) and trifluoromethyl ketimine **2** (0.12 mmol) in anhydrous 2-MeTHF (1.0 mL) at r.t, after completion (monitored by TLC), the reaction mixture was directly purified by flash column chromatography on silica gel (EA:PE = 1:50(v/v)) to obtain the title compounds **3ab-3ap**.

Racemates were prepared following the general procedure with 10 mol% 2,3-dihydrobenzo[*d*]imidazo[2,1-*b*]thiazole.

## 6. General Procedure for the Synthesis of Compounds **4**

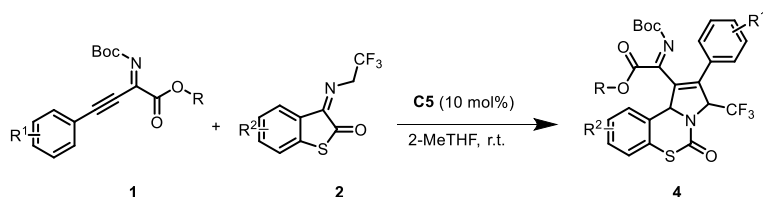

1-Alkynyl ketimines **1** (0.1 mmol) was added to a solution of catalyst **C5** (0.01 mmol, 10 mol%) and trifluoromethyl ketimine **2** (0.12 mmol) in anhydrous 2-MeTHF (1.0 mL) at r.t, after completion (monitored by TLC), the reaction mixture was directly purified by flash column chromatography on silica gel (EA:PE = 1:20(v/v)) to obtain the title compounds **4aa-4ea**, **4ka**, **4ma**, **4oa**, **4ab**.

## 7. Analytical Data and HPLC Chromatogram of the Products

### Methy (3*S*,5*S*)-2-((*tert*-butoxycarbonyl)amino)-6,6,6-trifluoro-5-(((*E*)-2-oxobenzo[*b*]thiophen-3(2*H*)-ylidene)amino)-4-phenylhexa-2,3-dienoate

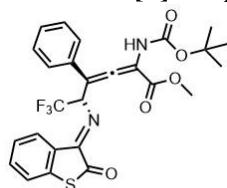

3aa

From 28.7 mg (0.1 mmol, 1.0 equiv) of **1a** and 29.4 mg (0.12 mmol, 1.2 equiv) of **2a**, 46.3 mg (87% yield) of compound **3aa** was obtained as a yellow solid,  $[\alpha]_D^{25} = -100$  ( $c = 1.0$ ,  $\text{CHCl}_3$ ), Mp. = 124 - 125 °C. Dr (> 20:1) was determined by HPLC analysis. 90% ee was determined by HPLC analysis (Daicel Chiralpak IC column, 245 nm, hexane/2-propanol 90:10, 1.0 mL/min). Retention time:  $t_{\text{major}} = 5.5$  min,  $t_{\text{minor}} = 8.2$  min.  $^1\text{H}$  NMR (400 MHz,  $\text{CDCl}_3$ )  $\delta$  7.83 (d,  $J = 6.5$  Hz, 1H), 7.72 (d,  $J = 7.7$  Hz, 2H), 7.50 (t,  $J = 6.9$  Hz, 1H), 7.40 (t,  $J = 7.6$  Hz, 2H), 7.37 – 7.27 (m, 3H), 6.48 (q,  $J = 6.5$  Hz, 1H), 6.11 (s, 1H), 3.35 (s, 3H), 1.44 (s, 9H).  $^{13}\text{C}$  NMR (101 MHz,  $\text{CDCl}_3$ )  $\delta$  205.2, 185.5, 164.2, 156.5, 151.4, 137.1, 134.2, 133.7, 129.0, 128.6, 128.5, 127.6, 127.3, 125.8, 124.6 (q,  $J_{\text{C-F}} = 282.8$  Hz), 123.8, 113.5, 105.8, 81.2, 61.5 (q,  $J_{\text{C-F}} = 32.4$  Hz), 53.0, 28.1.  $^{19}\text{F}$  NMR (376 MHz,  $\text{CDCl}_3$ )  $\delta$  -73.36. IR ( $\text{cm}^{-1}$ )  $\nu$  3345.6, 3059.7-2930.6, 1955.8, 1725.3-1694.9, 1506.6, 1297.1-1129.5, 931.8, 768.9. HRMS (ESI)  $m/z$  calcd for  $\text{C}_{26}\text{H}_{23}\text{F}_3\text{N}_2\text{NaO}_5\text{S}$   $[\text{M}+\text{Na}]^+$ : 555.1172, found 555.1166.

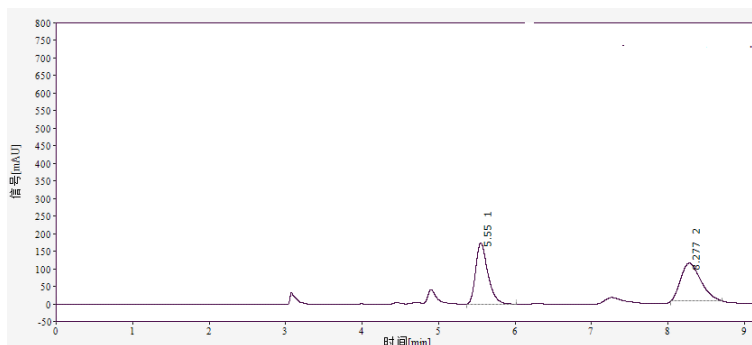

| No | Retention Time | Area     | % Area | Int Type |
|----|----------------|----------|--------|----------|
| 1  | 5.550          | 1930.115 | 49.4   | BB       |
| 2  | 8.277          | 1975.795 | 50.6   | BB       |

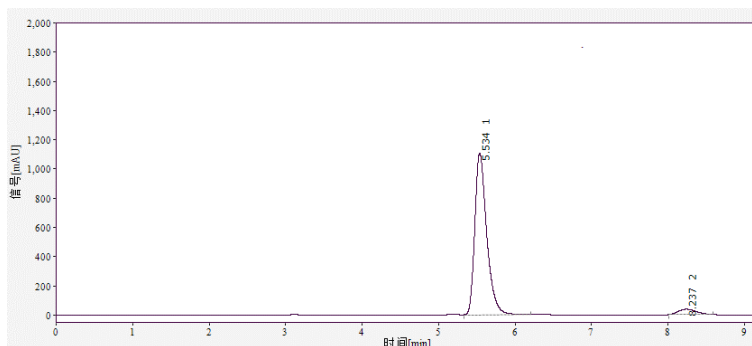

| No | Retention Time | Area      | % Area | Int Type |
|----|----------------|-----------|--------|----------|
| 1  | 5.534          | 11971.412 | 95.2   | BB       |
| 2  | 8.237          | 599.803   | 4.8    | BB       |

**Ethyl (3*S*,5*S*)-2-((*tert*-butoxycarbonyl)amino)-6,6,6-trifluoro-5-(((*E*)-2-oxobenzo[*b*]thiophen-3(2*H*)-ylidene)amino)-4-phenylhexa-2,3-dienoate**

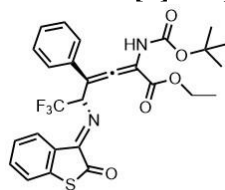

**3ba**

From 30.1 mg (0.1 mmol, 1.0 equiv) of **1b** and 29.4 mg (0.12 mmol, 1.2 equiv) of **2a**, 43.7 mg (80% yield) of compound **3ba** was obtained as a yellow solid,  $[\alpha]_D^{25} = -81$  ( $c = 1.0$ ,  $\text{CHCl}_3$ ), Mp. = 117 - 118 °C. Dr (> 20:1) was determined by HPLC analysis. 87% ee was determined by HPLC analysis (Daicel Chiralpak IA-3 column, 245 nm, hexane/2-propanol 90:10, 1.0 mL/min). Retention time:  $t_{\text{major}} = 6.3$  min,  $t_{\text{minor}} = 7.2$  min.  $^1\text{H NMR}$  (400 MHz,  $\text{CDCl}_3$ )  $\delta$  7.83 (d,  $J = 7.0$  Hz, 1H), 7.69 (d,  $J = 7.7$  Hz, 2H), 7.50 (t,  $J = 7.0$  Hz, 1H), 7.39 (t,  $J = 7.7$  Hz, 2H), 7.31 (q,  $J = 9.0$  Hz, 3H), 6.55 (q,  $J = 6.6$  Hz, 1H), 6.13 (s, 1H), 4.10 – 3.91 (m, 1H), 3.85 – 3.71 (m, 1H), 1.43 (s, 9H), 0.93 (t,  $J = 7.1$  Hz, 3H).  $^{13}\text{C NMR}$  (101 MHz,  $\text{CDCl}_3$ )  $\delta$  205.4, 185.7, 163.8, 156.5, 151.4, 137.2, 134.2, 133.8, 129.1, 128.5, 128.3, 127.7, 127.2, 124.5 (q,  $J_{\text{C-F}} = 282.8$  Hz), 123.8, 113.1, 105.9, 81.1, 62.4, 61.7 (q,  $J_{\text{C-F}} = 32.8$  Hz), 28.1, 13.8.  $^{19}\text{F NMR}$  (376 MHz,  $\text{CDCl}_3$ )  $\delta$  -73.08. IR ( $\text{cm}^{-1}$ )  $\nu$  3432.5, 3064.6-2873.0, 1958.0, 1732.5-1709.1, 1491.0-1455.0, 1287.8-1130.9, 933.0, 777.4. HRMS (ESI)  $m/z$  calcd for  $\text{C}_{27}\text{H}_{25}\text{F}_3\text{N}_2\text{NaO}_5\text{S}$   $[\text{M}+\text{Na}]^+$ : 569.1328, found 569.1331.

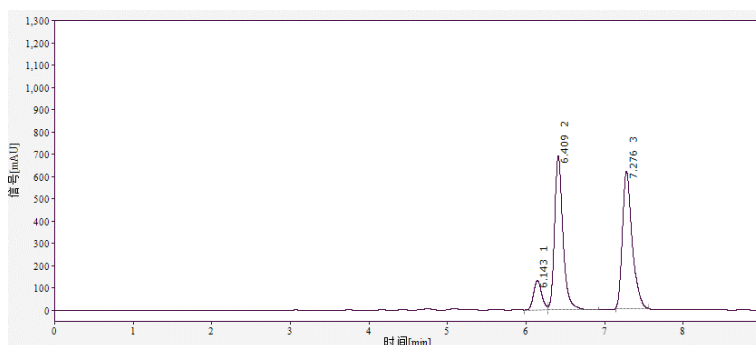

| No | Retention Time | Area     | % Area | Int Type |
|----|----------------|----------|--------|----------|
| 1  | 6.143          | 960.739  | 8.4    | BB       |
| 2  | 6.409          | 5139.160 | 45.1   | BB       |
| 3  | 7.276          | 5304.820 | 46.5   | BB       |

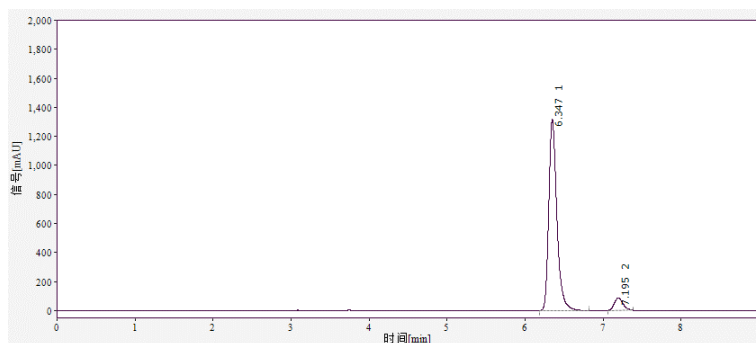

| No | Retention Time | Area      | % Area | Int Type |
|----|----------------|-----------|--------|----------|
| 1  | 6.347          | 19517.738 | 93.5   | BB       |
| 2  | 7.190          | 657.309   | 6.5    | BB       |

**Isopropyl (3*S*,5*S*)-2-((*tert*-butoxycarbonyl)amino)-6,6,6-trifluoro-5-(((*E*)-2-oxobenzo[*b*]thiophen-3(2*H*)-ylidene)amino)-4-phenylhexa-2,3-dienoate**



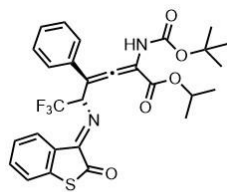

3ca

From 31.5 mg (0.1 mmol, 1.0 equiv) of **1c** and 45.4 mg (0.12 mmol, 1.2 equiv) of **2a**, 45.4 mg (81% yield) of compound **3ca** was obtained as a yellow solid,  $[\alpha]_D^{25} = -121$  ( $c = 1.0$ ,  $\text{CHCl}_3$ ), Mp. = 62 - 63 °C. Dr (> 20:1) was determined by HPLC analysis. 88% ee was determined by HPLC analysis (Daicel Chiralpak IC column, 245 nm, hexane/2-propanol 98:2, 1.0 mL/min). Retention time:  $t_{\text{major}} = 5.9$  min,  $t_{\text{minor}} = 6.6$  min.  $^1\text{H NMR}$  (400 MHz,  $\text{CDCl}_3$ )  $\delta$  7.74 (dd,  $J = 7.9, 1.4$  Hz, 1H), 7.55 (d,  $J = 7.9$  Hz, 2H), 7.40 (td,  $J = 7.6, 1.4$  Hz, 1H), 7.25 - 7.17 (m, 2H), 7.15 (d,  $J = 8.3$  Hz, 2H), 6.40 (q,  $J = 6.4$  Hz, 1H), 6.03 (s, 1H), 3.24 (s, 3H), 2.58 (q,  $J = 7.6$  Hz, 2H), 1.36 (s, 9H), 1.16 (t,  $J = 7.7$  Hz, 3H).  $^{13}\text{C NMR}$  (101 MHz,  $\text{CDCl}_3$ )  $\delta$  204.9, 185.5, 164.2, 156.5, 151.4, 144.8, 137.1, 134.2, 130.9, 129.0, 128.1, 127.5, 127.3, 125.8, 124.6 (q,  $J_{\text{C-F}} = 282.4$  Hz), 123.8, 113.5, 105.7, 81.2, 61.4 (q,  $J_{\text{C-F}} = 29.3$  Hz), 52.9, 28.6, 28.1, 15.4.  $^{19}\text{F NMR}$  (376 MHz,  $\text{CDCl}_3$ )  $\delta$  -73.36. IR ( $\text{cm}^{-1}$ )  $\nu$  3424.1, 3064.0-2933.1, 1948.6, 1708.6, 1492.3, 1264.2-1131.4, 933.5. HRMS (ESI)  $m/z$  calcd for  $\text{C}_{28}\text{H}_{27}\text{F}_3\text{N}_2\text{NaO}_5\text{S}$   $[\text{M}+\text{Na}]^+$ : 583.1485, found 583.1483.

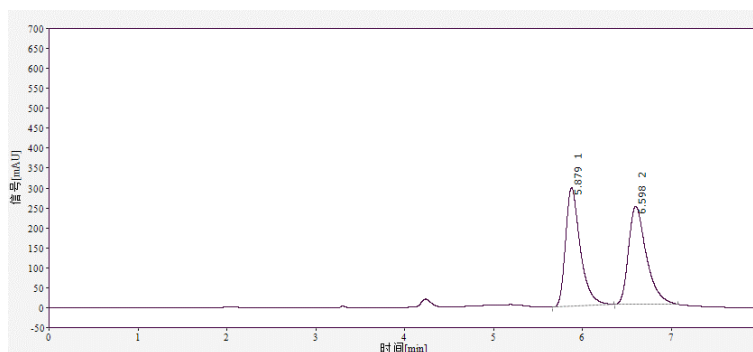

| No | Retention Time | Area     | % Area | Int Type |
|----|----------------|----------|--------|----------|
| 1  | 5.879          | 3425.107 | 49.9   | BB       |
| 2  | 6.598          | 3439.217 | 50.1   | BB       |

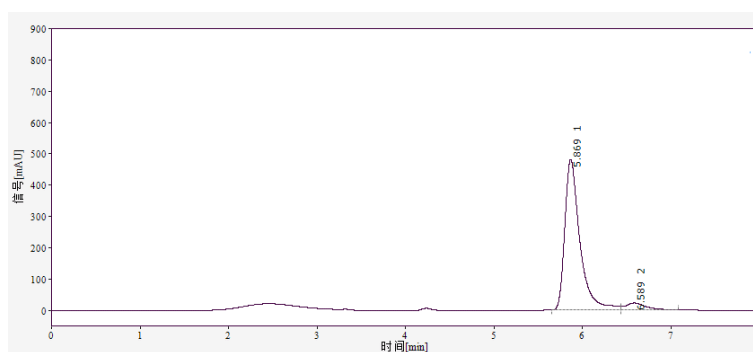

| No | Retention Time | Area     | % Area | Int Type |
|----|----------------|----------|--------|----------|
| 1  | 5.869          | 5706.137 | 94.2   | BB       |
| 2  | 6.589          | 349.135  | 5.8    | BB       |

**Methyl (3*S*,5*S*)-2-((*tert*-butoxycarbonyl)amino)-6,6,6-trifluoro-4-(2-fluorophenyl)-5-(((*E*)-2-oxobenzo[*b*]thiophen-3(2*H*)-ylidene)amino)hexa-2,3-dienoate**

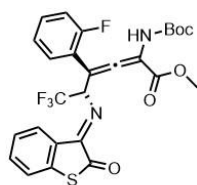

3ea

From 30.5 mg (0.1 mmol, 1.0 equiv) of **1e** and 29.4 mg (0.12 mmol, 1.2 equiv) of **2a**, 46.8 mg (85% yield) of compound **3ea** was obtained as a yellow solid,  $[\alpha]_D^{25} = -134$  ( $c = 1.0$ ,  $\text{CHCl}_3$ ), Mp. = 86 - 87 °C. Dr ( $> 20:1$ ) was determined by HPLC analysis. 90% ee was determined by HPLC analysis (Daicel Chiralpak IA-3 column, 245 nm, hexane/2-propanol 90:10, 1.0 mL/min). Retention time:  $t_{\text{major}} = 6.1$  min,  $t_{\text{minor}} = 6.8$  min.  $^1\text{H}$  NMR (400 MHz,  $\text{CDCl}_3$ )  $\delta$  7.83 – 7.76 (m, 1H), 7.67 (t,  $J = 7.8$  Hz, 1H), 7.50 (td,  $J = 7.7, 1.5$  Hz, 1H), 7.29 (dd,  $J = 7.8, 4.1$  Hz, 3H), 7.19 – 7.05 (m, 2H), 6.66 (q,  $J = 6.7$  Hz, 1H), 6.08 (s, 1H), 3.45 (s, 3H), 1.44 (s, 9H).  $^{13}\text{C}$  NMR (101 MHz,  $\text{CDCl}_3$ )  $\delta$  206.6, 185.3, 164.3, 161.5, 159.0, 156.8, 151.3, 137.2, 134.2, 130.7, 130.2, 130.1, 129.1, 127.2, 125.8, 124.5 (q,  $J_{\text{C-F}} = 282.7$  Hz), 124.2, 123.8, 121.7, 121.6, 116.3, 116.1, 108.3, 105.2, 81.2, 61.7 (q,  $J_{\text{C-F}} = 31.3$  Hz), 53.0, 29.7, 28.1.  $^{19}\text{F}$  NMR (376 MHz,  $\text{CDCl}_3$ )  $\delta$  -73.13, -111.59. IR ( $\text{cm}^{-1}$ )  $\nu$  33711.9, 3067.0-2932.9, 1747.8-1724.7, 1272.3-1135.6, 762.5. HRMS (ESI)  $m/z$  calcd for  $\text{C}_{26}\text{H}_{22}\text{F}_4\text{N}_2\text{NaO}_5\text{S}$   $[\text{M}+\text{Na}]^+$ : 573.1078, found 572.1070.

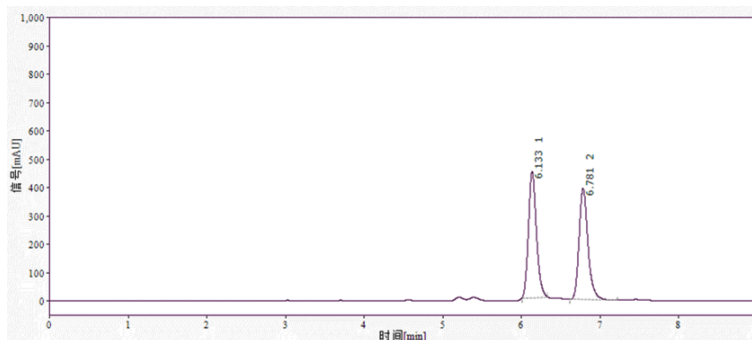

| No | Retention Time | Area     | % Area | Int Type |
|----|----------------|----------|--------|----------|
| 1  | 6.133          | 3129.399 | 50.3   | BB       |
| 2  | 6.781          | 3091.611 | 49.7   | BB       |

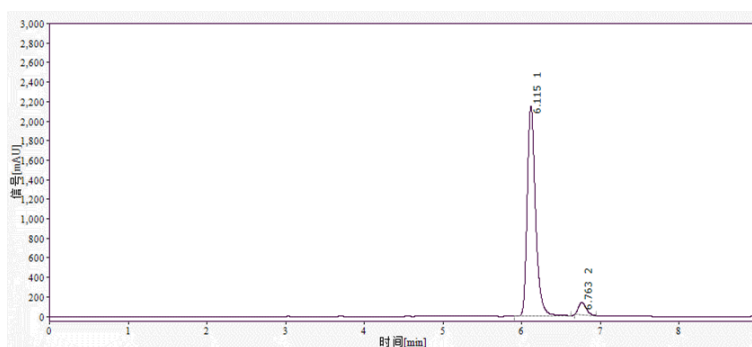

| No | Retention Time | Area      | % Area | Int Type |
|----|----------------|-----------|--------|----------|
| 1  | 6.115          | 15804.089 | 94.9   | BB       |
| 2  | 6.763          | 845.778   | 5.1    | BB       |

**Methyl (3*S*,5*S*)-2-((*tert*-butoxycarbonyl)amino)-4-(2-chlorophenyl)-6,6,6-trifluoro-5-(((*E*)-2-oxobenzo[*b*]thiophen-3(*2H*)-ylidene)amino)hexa-2,3-dienoate**

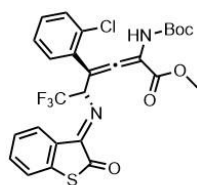

**3fa**

From 32.1 mg (0.1 mmol, 1.0 equiv) of **1f** and 29.4 mg (0.12 mmol, 1.2 equiv) of **2a**, 44.7 mg (79% yield) of compound **3fa** was obtained as a yellow solid,  $[\alpha]_D^{25} = -99$  ( $c = 1.0$ ,  $\text{CHCl}_3$ ), Mp. = 73 - 74 °C. Dr (> 20:1) was determined by HPLC analysis. 88% ee was determined by HPLC analysis (Daicel Chiralpak IC column, 245 nm, hexane/2-propanol 90:10, 1.0 mL/min). Retention time:  $t_{\text{major}} = 4.6$  min,  $t_{\text{minor}} = 5.4$  min.  $^1\text{H NMR}$  (400 MHz,  $\text{CDCl}_3$ )  $\delta$  7.76 (d,  $J = 8.1$  Hz, 1H), 7.69 (s, 1H), 7.50 (t,  $J = 6.9$  Hz, 1H), 7.41 – 7.35 (m, 1H), 7.35 – 7.22 (m, 5H), 6.78 (q,  $J = 6.7$  Hz, 1H), 6.07 (s, 1H), 3.59 (s, 3H), 1.45 (s, 9H).  $^{13}\text{C NMR}$  (101 MHz,  $\text{CDCl}_3$ )  $\delta$  205.4, 185.8, 164.6, 156.9, 151.1, 137.1, 134.2, 133.3, 133.1, 131.6, 129.9, 129.5, 129.3, 127.1, 126.8, 125.8, 124.1 (q,  $J_{\text{C-F}} = 282.5$  Hz), 123.8, 109.4, 105.0, 80.8, 62.4 (q,  $J_{\text{C-F}} = 29.8$  Hz), 52.9, 28.1.  $^{19}\text{F NMR}$  (376 MHz,  $\text{CDCl}_3$ )  $\delta$  -71.92. IR ( $\text{cm}^{-1}$ )  $\nu$  3366.5, 3067.3-2873.0, 1721.5, 1491.1-1436.6, 1254.6-1136.9, 759.3. HRMS (ESI)  $m/z$  calcd for  $\text{C}_{26}\text{H}_{22}\text{ClF}_3\text{N}_2\text{NaO}_5\text{S}$   $[\text{M}+\text{Na}]^+$ : 589.0782, found 589.0782.

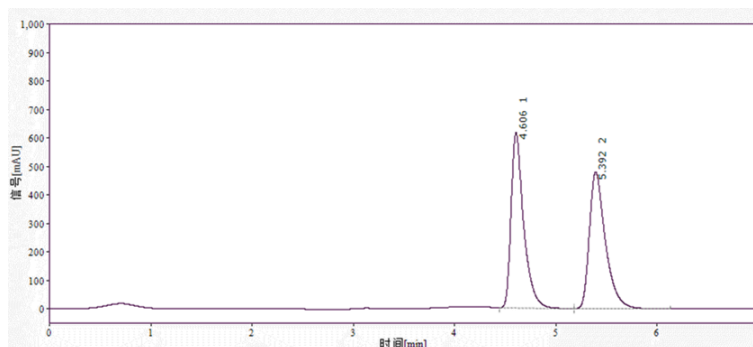

| No | Retention Time | Area     | % Area | Int Type |
|----|----------------|----------|--------|----------|
| 1  | 4.606          | 5292.374 | 50.0   | BB       |
| 2  | 5.302          | 5288.669 | 50.0   | BB       |

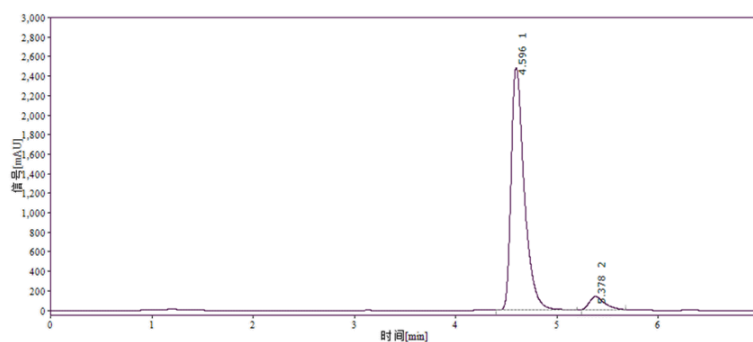

| No | Retention Time | Area      | % Area | Int Type |
|----|----------------|-----------|--------|----------|
| 1  | 4.596          | 22474.674 | 94.2   | BB       |
| 2  | 5.378          | 1384.494  | 5.8    | BB       |

**Methyl (3*S*,5*S*)-2-((*tert*-butoxycarbonyl)amino)-6,6,6-trifluoro-5-(((*E*)-2-oxobenzo[*b*]thiophen-3(2*H*)-ylidene)amino)-4-(*o*-tolyl)hexa-2,3-dienoate**

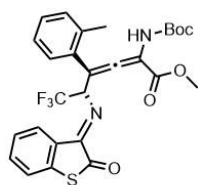

**3ga**

From 30.1 mg (0.1 mmol, 1.0 equiv) of **1g** and 29.4 mg (0.12 mmol, 1.2 equiv) of **2a**, 47.5 mg (87% yield) of compound **3ga** was obtained as a yellow solid,  $[\alpha]_D^{25} = -57$  ( $c = 1.0$ ,  $\text{CHCl}_3$ ), Mp. = 56 - 57 °C. Dr ( $> 20:1$ ) was determined by HPLC analysis. 90% ee was determined by HPLC analysis (Daicel Chiralpak IC column, 245 nm, hexane/2-propanol 90:10, 1.0 mL/min). Retention time:  $t_{\text{major}} = 4.3$  min,  $t_{\text{minor}} = 4.8$  min.  $^1\text{H NMR}$  (400 MHz,  $\text{CDCl}_3$ )  $\delta$  7.71 (d,  $J = 7.0$  Hz, 1H), 7.50 – 7.37 (m, 2H), 7.32 – 7.14 (m, 2H), 7.16 – 7.05 (m, 3H), 6.58 (q,  $J = 6.8$  Hz, 1H), 5.94 (s, 1H), 3.55 (s, 3H), 2.32 (s, 3H), 1.35 (s, 9H).  $^{13}\text{C NMR}$  (101 MHz,  $\text{CDCl}_3$ )  $\delta$  203.5, 186.0, 164.8, 156.8, 151.0, 137.2, 137.0, 134.2, 133.2, 130.5, 129.4, 129.2, 128.4, 128.3, 127.2, 125.9, 125.6, 125.6, 123.8, 122.8, 120.0, 110.8, 103.9, 80.7, 63.8, 63.5, 63.2, 62.9, 52.9, 28.1, 20.0.  $^{19}\text{F NMR}$  (376 MHz,  $\text{CDCl}_3$ )  $\delta$  -71.61. IR ( $\text{cm}^{-1}$ )  $\nu$  3363.9, 3065.8-2872.3, 1719.8, 1258.6-1134.1, 928.4, 760.5-728. HRMS (ESI)  $m/z$  calcd for  $\text{C}_{27}\text{H}_{25}\text{F}_3\text{N}_2\text{NaO}_5\text{S}$   $[\text{M}+\text{Na}]^+$ : 569.1328, found 569.1327.

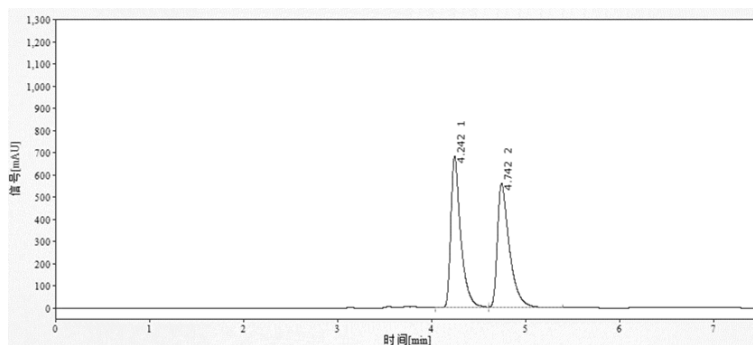

| No | Retention Time | Area     | % Area | Int Type |
|----|----------------|----------|--------|----------|
| 1  | 4.242          | 5019.486 | 50.1   | BB       |
| 2  | 4.742          | 4992.605 | 49.9   | BB       |

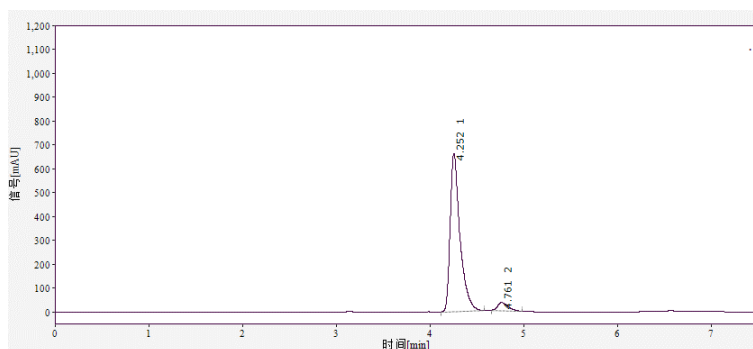

| No | Retention Time | Area     | % Area | Int Type |
|----|----------------|----------|--------|----------|
| 1  | 4.252          | 4798.851 | 95.0   | BB       |
| 2  | 4.761          | 250.859  | 5.0    | BB       |

**Methyl (3*S*,5*S*)-2-((*tert*-butoxycarbonyl)amino)-6,6,6-trifluoro-5-(((*E*)-2-oxobenzo[*b*]thiophen-3(2*H*)-ylidene)amino)-4-(*m*-tolyl)hexa-2,3-dienoate**

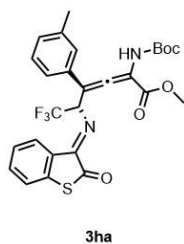

From 30.1 mg (0.1 mmol, 1.0 equiv) of **1h** and 29.4 mg (0.12 mmol, 1.2 equiv) of **2a**, 48.0 mg (88% yield) of compound **3ha** was obtained as a yellow solid,  $[\alpha]_D^{25} = -109$  ( $c = 1.0$ ,  $\text{CHCl}_3$ ), Mp. = 85 - 86 °C. Dr (> 20:1) was determined by HPLC analysis. 84% ee was determined by HPLC analysis (Daicel Chiralpak IC column, 245 nm, hexane/2-propanol 90:10, 1.0 mL/min). Retention time:  $t_{\text{major}} = 5.2$  min,  $t_{\text{minor}} = 5.8$  min.  $^1\text{H}$  NMR (400 MHz,  $\text{CDCl}_3$ )  $\delta$  7.74 (d,  $J = 8.5$  Hz, 1H), 7.49 – 7.34 (m, 3H), 7.22 (td,  $J = 7.3, 2.7$  Hz, 3H), 7.06 (d,  $J = 7.5$  Hz, 1H), 6.40 (q,  $J = 6.4$  Hz, 1H), 6.04 (s, 1H), 3.26 (s, 3H), 2.30 (s, 3H), 1.37 (s, 9H).  $^{13}\text{C}$  NMR (101 MHz,  $\text{CDCl}_3$ )  $\delta$  205.1, 185.5, 164.3, 156.5, 151.5, 138.1, 137.1, 134.2, 133.6, 129.4, 129.0, 128.4, 128.3, 127.3, 125.8, 124.6 (q,  $J_{\text{C-F}} = 282.2$  Hz), 123.8, 113.6, 105.8, 81.2, 61.5 (q,  $J_{\text{C-F}} = 28.0$  Hz), 53.0, 29.7, 28.1, 21.6.  $^{19}\text{F}$  NMR (376 MHz,  $\text{CDCl}_3$ )  $\delta$  -73.30. IR ( $\text{cm}^{-1}$ )  $\nu$  3339.9, 3065.2-2870.9, 1955.1, 1727.5-1714.2, 1631.9-1435.4, 1293.3-1130.0, 930.6, 769.9. HRMS (ESI)  $m/z$  calcd for  $\text{C}_{27}\text{H}_{25}\text{F}_3\text{N}_2\text{NaO}_5\text{S}$   $[\text{M}+\text{Na}]^+$ : 569.1328, found 569.1333.

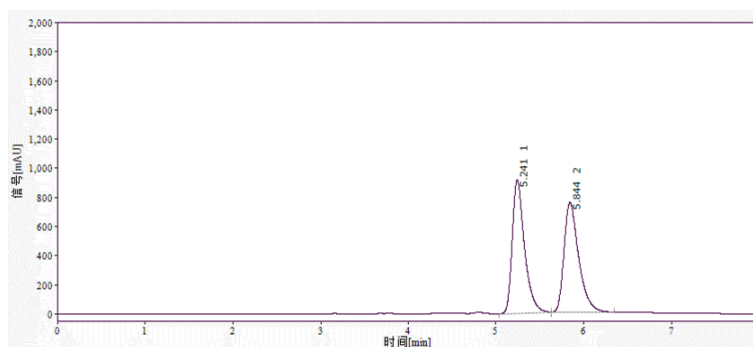

| No | Retention Time | Area     | % Area | Int Type |
|----|----------------|----------|--------|----------|
| 1  | 5.241          | 8865.704 | 50.4   | BB       |
| 2  | 5.844          | 8725.868 | 49.6   | BB       |

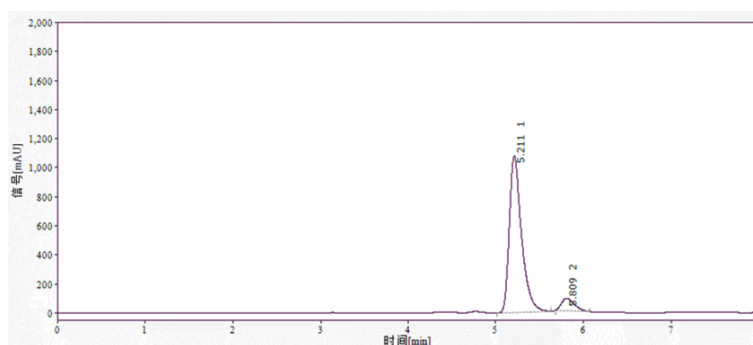

| No | Retention Time | Area      | % Area | Int Type |
|----|----------------|-----------|--------|----------|
| 1  | 5.211          | 10351.396 | 92.1   | BB       |
| 2  | 5.809          | 882.552   | 7.9    | BB       |

**Methyl (3*S*,5*S*)-2-((*tert*-butoxycarbonyl)amino)-6,6,6-trifluoro-4-(3-methoxyphenyl)-5-(((*E*)-2-oxobenzo[*b*]thiophen-3(*2H*)-ylidene)amino)hexa-2,3-dienoate**

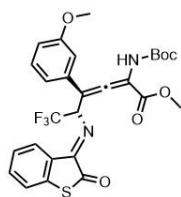

3ia

From 31.7 mg (0.1 mmol, 1.0 equiv) of **1i** and 29.4 mg (0.12 mmol, 1.2 equiv) of **2a**, 46.1 mg (82% yield) of compound **3ia** was obtained as a yellow solid,  $[\alpha]_D^{25} = -110$  ( $c = 1.0$ ,  $\text{CHCl}_3$ ), Mp. = 129 - 130 °C. Dr (> 20:1) was determined by HPLC analysis. 85% ee was determined by HPLC analysis (Daicel Chiralpak IC column, 245 nm, hexane/2-propanol 90:10, 1.0 mL/min). Retention time:  $t_{\text{major}} = 6.9$  min,  $t_{\text{minor}} = 9.2$  min.  $^1\text{H NMR}$  (400 MHz,  $\text{CDCl}_3$ )  $\delta$  7.75 (dd,  $J = 7.9, 1.4$  Hz, 1H), 7.49 – 7.37 (m, 1H), 7.31 – 7.18 (m, 5H), 6.90 – 6.77 (m, 1H), 6.38 (q,  $J = 6.5$  Hz, 1H), 6.03 (s, 1H), 3.75 (s, 3H), 3.27 (s, 3H), 1.37 (s, 9H).  $^{13}\text{C NMR}$  (101 MHz,  $\text{CDCl}_3$ )  $\delta$  205.3, 185.5, 164.2, 159.7, 156.5, 151.4, 137.2, 135.1, 134.2, 129.5, 129.0, 127.3, 124.5 (q,  $J_{\text{C-F}} = 282.8$  Hz), 123.8, 119.9, 114.4, 113.5, 113.4, 105.7, 81.2, 61.7 (q,  $J_{\text{C-F}} = 32.3$  Hz), 55.2, 53.0, 28.1.  $^{19}\text{F NMR}$  (376 MHz,  $\text{CDCl}_3$ )  $\delta$  -73.40. IR ( $\text{cm}^{-1}$ )  $\nu$  3340.3, 3068.4-2834.5, 1954.8, 1725.4-1712.8, 1291.5-1129.6, 933.2, 755.0. HRMS (ESI)  $m/z$  calcd for  $\text{C}_{27}\text{H}_{25}\text{F}_3\text{N}_2\text{NaO}_6\text{S}$   $[\text{M}+\text{Na}]^+$ : 585.1278, found 585.1263.

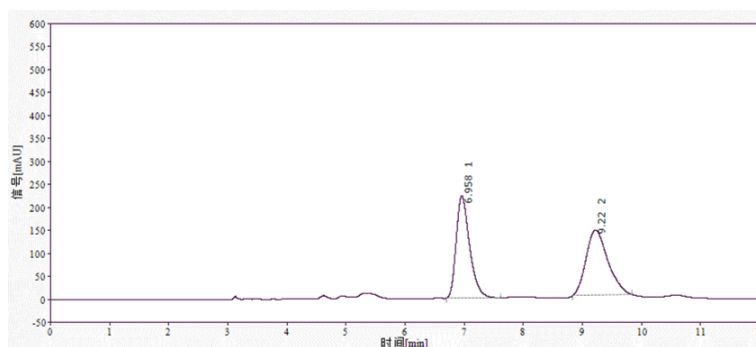

| No | Retention Time | Area     | % Area | Int Type |
|----|----------------|----------|--------|----------|
| 1  | 6.958          | 3518.513 | 49.4   | BB       |
| 2  | 9.220          | 3606.859 | 50.6   | BB       |

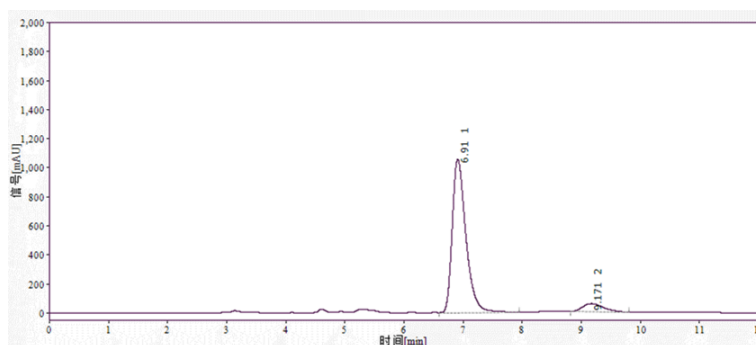

| No | Retention Time | Area      | % Area | Int Type |
|----|----------------|-----------|--------|----------|
| 1  | 6.910          | 16927.451 | 92.3   | BB       |
| 2  | 9.171          | 1405.873  | 7.7    | BB       |

**Methyl (3*S*,5*S*)-2-((*tert*-butoxycarbonyl)amino)-6,6,6-trifluoro-4-(4-fluorophenyl)-5-(((*E*)-2-oxobenzo[*b*]thiophen-3(*2H*)-ylidene)amino)hexa-2,3-dienoate**

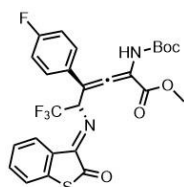

3ja

From 30.5 mg (0.1 mmol, 1.0 equiv) of **1j** and 29.4 mg (0.12 mmol, 1.2 equiv) of **2a**, 46.2 mg (84% yield) of compound **3ja** was obtained as a yellow solid,  $[\alpha]_D^{25} = -95$  ( $c = 1.0$ ,  $\text{CHCl}_3$ ), Mp. = 66 - 67 °C. Dr (> 20:1) was determined by HPLC analysis. 88% ee was determined by HPLC analysis (Daicel Chiralpak IA-3 column, 245 nm, hexane/2-propanol 90:10, 1.0 mL/min). Retention time:  $t_{\text{major}} = 6.1$  min,  $t_{\text{minor}} = 7.2$  min.  $^1\text{H NMR}$  (400 MHz,  $\text{CDCl}_3$ )  $\delta$  7.83 (d,  $J = 6.8$  Hz, 1H), 7.73 (dd,  $J = 8.6, 5.4$  Hz, 2H), 7.51 (t,  $J = 7.0$  Hz, 1H), 7.38 – 7.27 (m, 2H), 7.09 (t,  $J = 8.7$  Hz, 2H), 6.40 (q,  $J = 6.5$  Hz, 1H), 6.11 (s, 1H), 3.37 (s, 3H), 1.45 (s, 9H).  $^{13}\text{C NMR}$  (101 MHz,  $\text{CDCl}_3$ )  $\delta$  204.8, 185.7, 164.1, 161.6, 156.6, 151.3, 137.1, 134.3, 129.8, 129.5, 129.5, 128.9, 127.4, 125.8, 124.5 (q,  $J_{\text{C-F}} = 282.7$  Hz), 123.8, 115.7, 115.5, 112.6, 105.8, 81.2, 61.8 (q,  $J_{\text{C-F}} = 31.4$  Hz), 53.0, 29.7, 28.1.  $^{19}\text{F NMR}$  (376 MHz,  $\text{CDCl}_3$ )  $\delta$  -73.39, -113.23. IR ( $\text{cm}^{-1}$ )  $\nu$  3424.2, 3340.9, 3070.7-2873.2, 1956.5, 1717.3, 1509.2, 1281.2-1131.0, 930.4. HRMS (ESI)  $m/z$  calcd for  $\text{C}_{26}\text{H}_{22}\text{F}_4\text{N}_2\text{NaO}_5\text{S}$   $[\text{M}+\text{Na}]^+$ : 573.1078, found 573.1061.

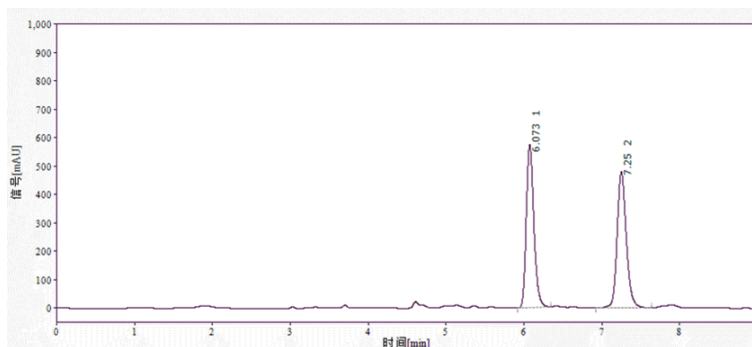

| No | Retention Time | Area     | % Area | Int Type |
|----|----------------|----------|--------|----------|
| 1  | 6.073          | 3864.781 | 49.8   | BB       |
| 2  | 7.250          | 39.228   | 50.2   | BB       |

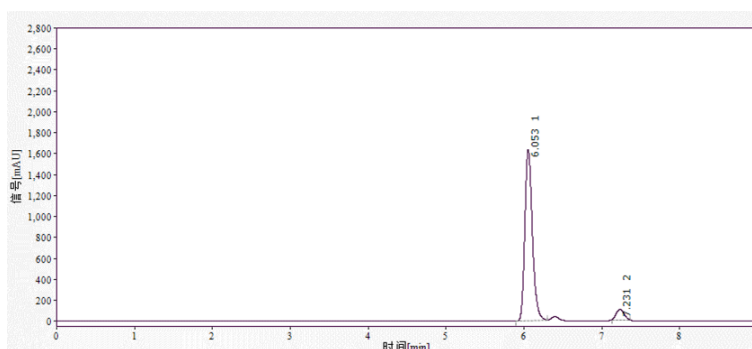

| No | Retention Time | Area      | % Area | Int Type |
|----|----------------|-----------|--------|----------|
| 1  | 6.053          | 10943.225 | 94     | BB       |
| 2  | 7.231          | 702.761   | 6      | BB       |

**Methyl (3*S*,5*S*)-2-((*tert*-butoxycarbonyl)amino)-4-(4-chlorophenyl)-6,6,6-trifluoro-5-(((*E*)-2-oxobenzo[*b*]thiophen-3(2*H*)-ylidene)amino)hexa-2,3-dienoate**

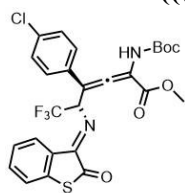

**3ka**

From 32.1 mg (0.1 mmol, 1.0 equiv) of **1k** and 29.4 mg (0.12 mmol, 1.2 equiv) of **2a**, 45.8 mg (81% yield) of compound **3ka** was obtained as a yellow solid [ $\alpha$ ]  $D^{25} = -109$  ( $c = 1.0$ ,  $\text{CHCl}_3$ ), Mp. = 58 - 59 °C. Dr (> 20:1) was determined by HPLC analysis. 91% ee was determined by HPLC analysis (Daicel Chiralpak IC column, 245 nm, hexane/2-propanol 99:1, 1.0 mL/min). Retention time:  $t_{\text{major}} = 16.2$  min,  $t_{\text{minor}} = 13.2$  min.  $^1\text{H}$  NMR (400 MHz,  $\text{CDCl}_3$ )  $\delta$  7.83 (d,  $J = 8.0$  Hz, 1H), 7.67 (d,  $J = 8.2$  Hz, 2H), 7.58 - 7.47 (m, 1H), 7.37 (d,  $J = 8.7$  Hz, 2H), 7.32 (dt,  $J = 7.3, 3.4$  Hz, 2H), 6.39 (q,  $J = 6.5$  Hz, 1H), 6.11 (s, 1H), 3.36 (s, 3H), 1.45 (s, 9H).  $^{13}\text{C}$  NMR (101 MHz,  $\text{CDCl}_3$ )  $\delta$  204.3, 184.6, 162.9, 155.6, 150.2, 136.1, 133.4, 133.3, 131.3, 130.1, 127.9, 127.9, 127.7, 126.3, 124.8, 123.5 (q,  $J_{\text{C-F}} = 282.7$  Hz), 122.8, 111.6, 105.0, 80.3, 60.5 (q,  $J_{\text{C-F}} = 29.9$  Hz), 52.0, 27.0.  $^{19}\text{F}$  NMR (376 MHz,  $\text{CDCl}_3$ )  $\delta$  -73.44. IR ( $\text{cm}^{-1}$ )  $\nu$  3420.8, 3068.4-2872.3, 1947.9, 1719.6, 1491.1-1454.4, 1289.5-1130.6, 929.7. HRMS (ESI)  $m/z$  calcd for  $\text{C}_{26}\text{H}_{22}\text{ClF}_3\text{N}_2\text{NaO}_5\text{S}$   $[\text{M}+\text{Na}]^+$ : 589.0782, found 589.0783.

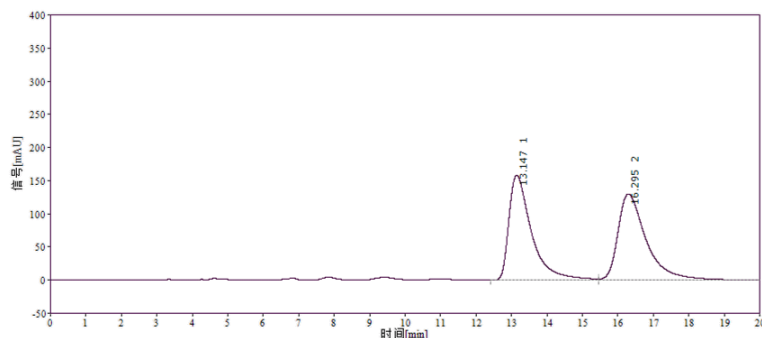

| No | Retention Time | Area     | % Area | Int Type |
|----|----------------|----------|--------|----------|
| 1  | 13.147         | 7023.659 | 49.3   | BB       |
| 2  | 16.295         | 7227.811 | 50.7   | BB       |

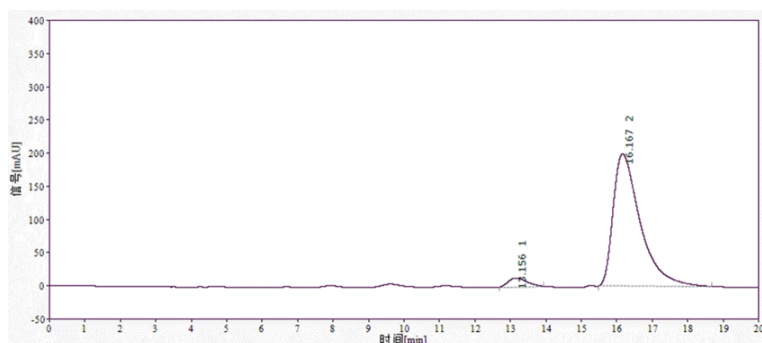

| No | Retention Time | Area      | % Area | Int Type |
|----|----------------|-----------|--------|----------|
| 1  | 13.156         | 475.664   | 4.3    | BB       |
| 2  | 16.167         | 10600.140 | 95.7   | BB       |



**Methyl (3*S*,5*S*)-4-(4-bromophenyl)-2-((*tert*-butoxycarbonyl)amino)-6,6,6-trifluoro-5-(((*E*)-2-oxobenzo[*b*]thiophen-3(2*H*)-ylidene)amino)hexa-2,3-dienoate**

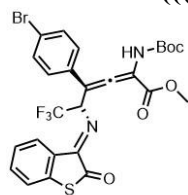

**31a**

From 36.5 mg (0.1 mmol, 1.0 equiv) of **11** and 29.4 mg (0.12 mmol, 1.2 equiv) of **2a**, 52.5 mg (86% yield) of compound **31a** was obtained as a yellow solid,  $[\alpha]_D^{25} = -105$  ( $c = 1.0$ ,  $\text{CHCl}_3$ ), Mp. = 85 - 86 °C. Dr (> 20:1) was determined by HPLC analysis. 89% ee was determined by HPLC analysis (Daicel Chiralpak IA-3 column, 245 nm, hexane/2-propanol 90:10, 1.0 mL/min). Retention time:  $t_{\text{major}} = 6.2$  min,  $t_{\text{minor}} = 7.7$  min.  $^1\text{H NMR}$  (400 MHz,  $\text{CDCl}_3$ )  $\delta$  7.93 – 7.78 (m, 1H), 7.61 (d,  $J = 8.3$  Hz, 2H), 7.58 – 7.41 (m, 3H), 7.31 (dt,  $J = 7.6, 3.6$  Hz, 2H), 6.39 (q,  $J = 6.5$  Hz, 1H), 6.11 (s, 1H), 3.36 (s, 3H), 1.45 (s, 9H).  $^{13}\text{C NMR}$  (101 MHz,  $\text{CDCl}_3$ )  $\delta$  205.3, 185.7, 163.9, 156.7, 151.3, 137.2, 134.3, 132.8, 131.7, 129.2, 128.9, 127.4, 125.8, 124.5 (q,  $J_{\text{C-F}} = 282.4$  Hz), 122.7, 112.7, 106.1, 81.4, 61.5 (q,  $J_{\text{C-F}} = 27.2$  Hz), 53.1, 28.1.  $^{19}\text{F NMR}$  (376 MHz,  $\text{CDCl}_3$ )  $\delta$  -73.42. IR ( $\text{cm}^{-1}$ )  $\nu$  3421.6, 3067.6-2930.3, 1946.9, 1718.9, 1489.4, 1289.2-1131.2, 929.9. HRMS (ESI)  $m/z$  calcd for  $\text{C}_{26}\text{H}_{22}\text{BrF}_3\text{N}_2\text{NaO}_5\text{S}$   $[\text{M}+\text{Na}]^+$ : 633.0277, found 633.0262.

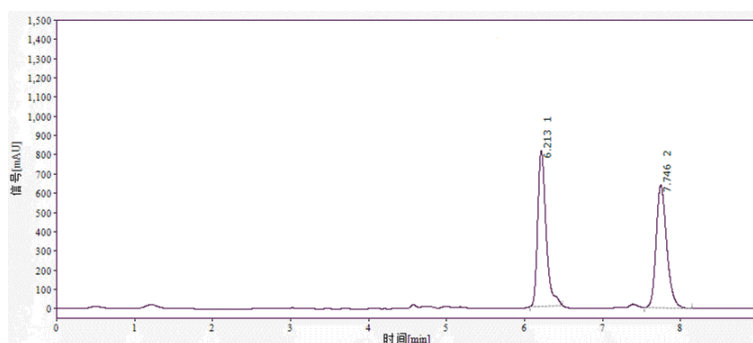

| No | Retention Time | Area     | % Area | Int Type |
|----|----------------|----------|--------|----------|
| 1  | 6.213          | 6026.924 | 50.1   | BB       |
| 2  | 7.746          | 6005.234 | 49.9   | BB       |

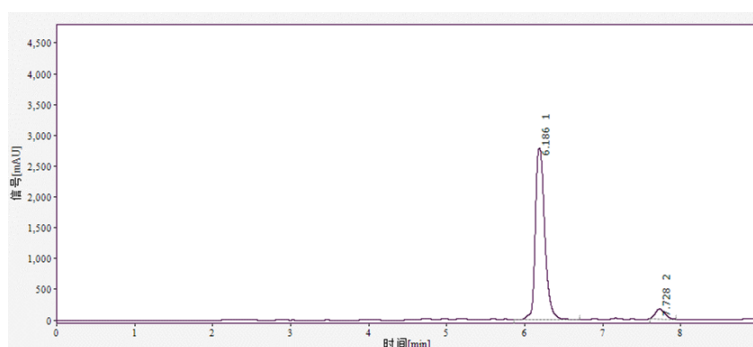

| No | Retention Time | Area      | % Area | Int Type |
|----|----------------|-----------|--------|----------|
| 1  | 6.186          | 23307.593 | 94.4   | BB       |
| 2  | 7.728          | 1394.429  | 5.6    | BB       |

**Methyl (3*S*,5*S*)-2-((*tert*-butoxycarbonyl)amino)-6,6,6-trifluoro-5-(((*E*)-2-oxobenzo[*b*]thiophen-3(2*H*)-ylidene)amino)-4-(*p*-tolyl)hexa-2,3-dienoate**

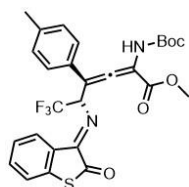

**3ma**

From 30.1 mg (0.1 mmol, 1.0 equiv) of **1m** and 29.4 mg (0.12 mmol, 1.2 equiv) of **2a**, 48.0 mg (88% yield) of compound **3ma** was obtained as a yellow solid,  $[\alpha]_D^{25} = -103$  ( $c = 1.0$ ,  $\text{CHCl}_3$ ), Mp. = 86 - 87 °C. Dr (> 20:1) was determined by HPLC analysis. 87% ee was determined by HPLC analysis (Daicel Chiralpak IA-3 column, 245 nm, hexane/2-propanol 90:10, 1.0 mL/min). Retention time:  $t_{\text{major}} = 6.4$  min,  $t_{\text{minor}} = 7.5$  min.  $^1\text{H NMR}$  (400 MHz,  $\text{CDCl}_3$ )  $\delta$  7.82 (d,  $J = 6.6$  Hz, 1H), 7.60 (d,  $J = 7.9$  Hz, 2H), 7.54 – 7.45 (m, 1H), 7.36 – 7.26 (m, 2H), 7.21 (d,  $J = 8.0$  Hz, 2H), 6.46 (q,  $J = 6.5$  Hz, 1H), 6.10 (s, 1H), 3.33 (s, 3H), 2.36 (s, 3H), 1.44 (s, 9H).  $^{13}\text{C NMR}$  (101 MHz,  $\text{CDCl}_3$ )  $\delta$  204.9, 185.4, 164.2, 156.5, 151.4, 138.5, 137.1, 134.2, 130.7, 129.3, 129.0, 127.4, 127.3, 125.8, 124.6 (q,  $J_{\text{C-F}} = 282.6$  Hz), 123.8, 113.5, 105.7, 81.2, 61.4 (q,  $J_{\text{C-F}} = 29.8$  Hz), 52.9, 28.1, 21.3.  $^{19}\text{F NMR}$  (376 MHz,  $\text{CDCl}_3$ )  $\delta$  -73.38. IR ( $\text{cm}^{-1}$ )  $\nu$  3423.5, 2963.4-2850.4, 1946.4, 1717.2, 1491.5, 1262.5, 1167.9-1021.9, 928.9, 800.8. HRMS (ESI)  $m/z$  calcd for  $\text{C}_{27}\text{H}_{25}\text{F}_3\text{N}_2\text{NaO}_5\text{S}$   $[\text{M}+\text{Na}]^+$ : 569.1328, found 569.1338.

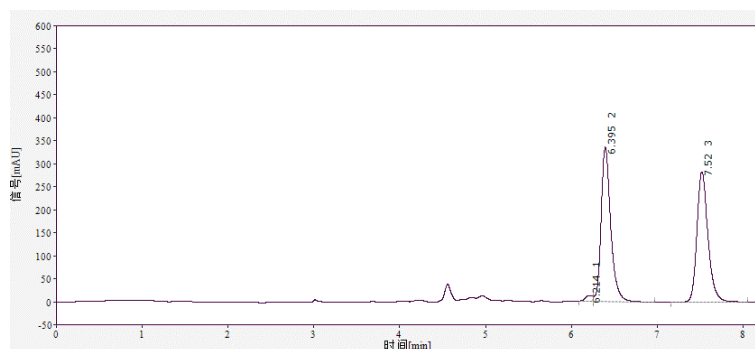

| No | Retention Time | Area     | % Area | Int Type |
|----|----------------|----------|--------|----------|
| 1  | 6.214          | 71.309   | 1.4    | BB       |
| 2  | 6.395          | 2604.943 | 49.6   | BB       |
| 3  | 7.520          | 2570.974 | 49.0   | BB       |

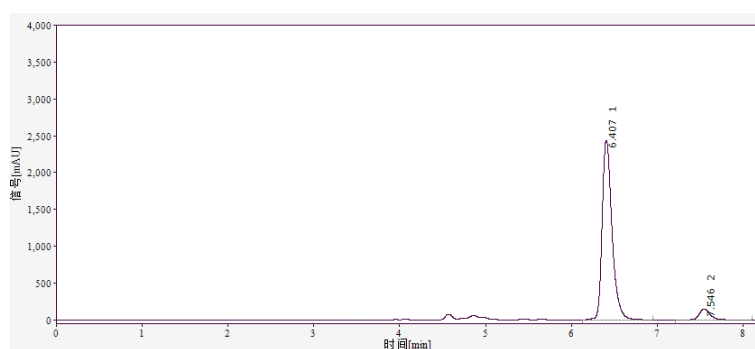

| No | Retention Time | Area      | % Area | Int Type |
|----|----------------|-----------|--------|----------|
| 1  | 6.407          | 19455.734 | 93.5   | BB       |
| 2  | 7.546          | 1342.336  | 6.5    | BB       |

**Methyl (3*S*,5*S*)-2-((*tert*-butoxycarbonyl)amino)-4-(4-ethylphenyl)-6,6,6-trifluoro-5-(((*E*)-2-oxobenzo[*b*]thiophen-3(2*H*)-ylidene)amino)hexa-2,3-dienoate**

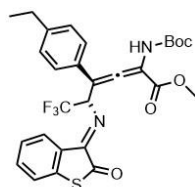

3na

From 31.5 mg (0.1 mmol, 1.0 equiv) of **1n** and 29.4 mg (0.12 mmol, 1.2 equiv) of **2a**, 42.6 mg (76% yield) of compound **3na** was obtained as a yellow solid,  $[\alpha]_D^{25} = -232$  ( $c = 1.0$ ,  $\text{CHCl}_3$ ), Mp. = 63 - 64 °C. Dr (> 20:1) was determined by HPLC analysis. 87% ee was determined by HPLC analysis (Daicel Chiralpak IA-3 column, 245 nm, hexane/2-propanol 90:10, 1.0 mL/min). Retention time:  $t_{\text{major}} = 5.9$  min,  $t_{\text{minor}} = 6.7$  min.  $^1\text{H}$  NMR (400 MHz,  $\text{CDCl}_3$ )  $\delta$  7.82 (d,  $J = 6.7$  Hz, 1H), 7.63 (d,  $J = 7.9$  Hz, 2H), 7.50 (d,  $J = 7.0$  Hz, 1H), 7.36 – 7.20 (m, 5H), 6.48 (q,  $J = 6.5$  Hz, 1H), 6.11 (s, 1H), 3.33 (s, 3H), 2.66 (q,  $J = 7.6$  Hz, 2H), 1.44 (s, 9H), 1.24 (t,  $J = 7.6$  Hz, 3H).  $^{13}\text{C}$  NMR (101 MHz,  $\text{CDCl}_3$ )  $\delta$  204.9, 185.5, 164.2, 156.5, 151.4, 144.8, 137.1, 134.2, 130.9, 129.0, 128.1, 127.9, 127.5, 127.3, 125.8, 124.6 (q,  $J_{\text{C-F}} = 282.3$  Hz), 113.5, 105.7, 81.2, 61.4 (q,  $J_{\text{C-F}} = 32.4$  Hz), 52.9, 28.6, 28.1, 15.4.  $^{19}\text{F}$  NMR (376 MHz,  $\text{CDCl}_3$ )  $\delta$  -73.36. IR ( $\text{cm}^{-1}$ )  $\nu$  3422.2, 3067.9-2841.9, 1946.1, 1715.7, 1512.7-1492.2, 1292.3-1129.3, 929.0. HRMS (ESI)  $m/z$  calcd for  $\text{C}_{28}\text{H}_{27}\text{F}_3\text{N}_2\text{NaO}_5\text{S}$   $[\text{M}+\text{Na}]^+$ : 583.1485, found 583.1485.

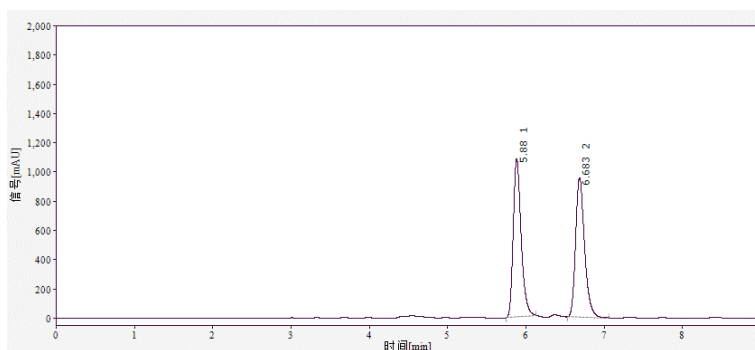

| No | Retention Time | Area     | % Area | Int Type |
|----|----------------|----------|--------|----------|
| 1  | 5.880          | 7571.076 | 50.0   | BB       |
| 2  | 6.683          | 7581.970 | 50.0   | BB       |

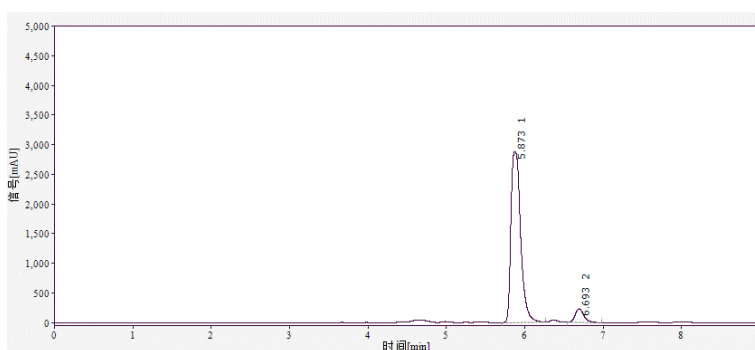

| No | Retention Time | Area      | % Area | Int Type |
|----|----------------|-----------|--------|----------|
| 1  | 5.873          | 24691.892 | 93.4   | BB       |
| 2  | 6.693          | 1756.627  | 6.6    | BB       |

**Methyl (3*S*,5*S*)-2-((*tert*-butoxycarbonyl)amino)-6,6,6-trifluoro-4-(4-methoxyphenyl)-5-(((*E*)-2-oxobenzo[*b*]thiophen-3(2*H*)-ylidene)amino)hexa-2,3-dienoate**

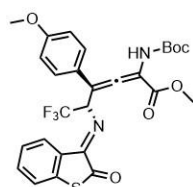

**3oa**

From 31.7 mg (0.1 mmol, 1.0 equiv) of **1o** and 29.4 mg (0.12 mmol, 1.2 equiv) of **2a**, 50.1 mg (90% yield) of compound **3oa** was obtained as a yellow solid,  $[\alpha]_D^{25} = -125$  ( $c = 1.0$ ,  $\text{CHCl}_3$ ), Mp. = 67 - 68 °C. Dr (> 20:1) was determined by HPLC analysis. 87% ee was determined by HPLC analysis (Daicel Chiralpak IA column, 245 nm, hexane/2-propanol 90:10, 1.0 mL/min). Retention time:  $t_{\text{major}} = 7.8$  min,  $t_{\text{minor}} = 9.7$  min.  $^1\text{H NMR}$  (400 MHz,  $\text{CDCl}_3$ )  $\delta$  7.83 (d,  $J = 6.5$  Hz, 1H), 7.72 (d,  $J = 7.7$  Hz, 2H), 7.50 (t,  $J = 6.9$  Hz, 1H), 7.40 (t,  $J = 7.6$  Hz, 2H), 7.37 - 7.27 (m, 3H), 6.48 (q,  $J = 6.5$  Hz, 1H), 6.11 (s, 1H), 3.35 (s, 3H), 1.44 (s, 9H).  $^{13}\text{C NMR}$  (101 MHz,  $\text{CDCl}_3$ )  $\delta$  204.5, 185.5, 164.2, 159.9, 156.5, 151.5, 137.1, 134.2, 129.0, 128.9, 127.3, 125.9, 125.8, 124.6 (q,  $J_{\text{C-F}} = 282.2$  Hz), 123.8, 114.1, 113.2, 105.6, 81.1, 61.5 (q,  $J_{\text{C-F}} = 32.8$  Hz), 55.3, 52.9, 29.7, 28.1.  $^{19}\text{F NMR}$  (376 MHz,  $\text{CDCl}_3$ )  $\delta$  -73.38. IR ( $\text{cm}^{-1}$ )  $\nu$  3423.8, 2962.7-2851.3, 1947.1, 1718.3, 1491.5, 1263.0-1129.7, 1021.8, 929.1, 801.5. HRMS (ESI)  $m/z$  calcd for  $\text{C}_{27}\text{H}_{25}\text{F}_3\text{N}_2\text{NaO}_6\text{S}$   $[\text{M}+\text{Na}]^+$ : 585.1278, found 585.1260.

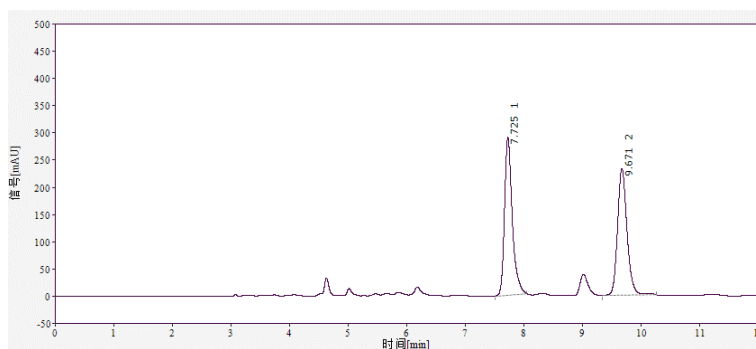

| No | Retention Time | Area     | % Area | Int Type |
|----|----------------|----------|--------|----------|
| 1  | 7.725          | 2670.838 | 50.4   | BB       |
| 2  | 9.671          | 2629.996 | 49.6   | BB       |

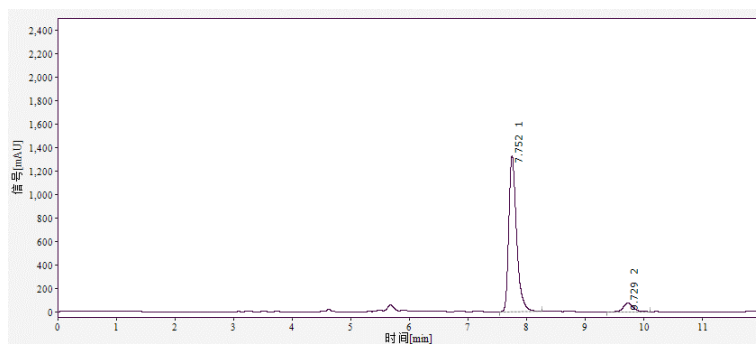

| No | Retention Time | Area      | % Area | Int Type |
|----|----------------|-----------|--------|----------|
| 1  | 7.752          | 12252.845 | 93.5   | BB       |
| 2  | 9.729          | 845.110   | 6.5    | BB       |

**Methyl (3*S*,5*S*)-4-([1,1'-biphenyl]-4-yl)-2-((*tert*-butoxycarbonyl)amino)-6,6,6-trifluoro-5-(((*E*)-2-oxobenzo[*b*]thiophen-3(2*H*)-ylidene)amino)hexa-2,3-dienoate**

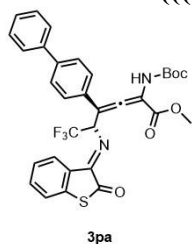

From 36.3 mg (0.1 mmol, 1.0 equiv) of **1p** and 29.4 mg (0.12 mmol, 1.2 equiv) of **2a**, 51.7 mg (85% yield) of compound **3pa** was obtained as a yellow solid,  $[\alpha]_D^{25} = -125$  ( $c = 1.0$ ,  $\text{CHCl}_3$ ), Mp. = 90 - 91 °C. Dr ( $> 20:1$ ) was determined by HPLC analysis. 84% ee was determined by HPLC analysis (Daicel Chiralpak IA-3 column, 245 nm, hexane/2-propanol 90:10, 1.0 mL/min). Retention time:  $t_{\text{major}} = 8.0$  min,  $t_{\text{minor}} = 14.2$  min.  $^1\text{H}$  NMR (400 MHz,  $\text{CDCl}_3$ )  $\delta$  7.92 – 7.74 (m, 3H), 7.62 (dd,  $J = 10.3, 7.8$  Hz, 4H), 7.50 (t,  $J = 7.0$  Hz, 1H), 7.44 (t,  $J = 7.6$  Hz, 2H), 7.40 – 7.27 (m, 3H), 6.52 (q,  $J = 6.5$  Hz, 1H), 6.13 (s, 1H), 3.35 (s, 3H), 1.46 (s, 9H).  $^{13}\text{C}$  NMR (101 MHz,  $\text{CDCl}_3$ )  $\delta$  205.4, 185.6, 164.2, 156.6, 151.4, 141.3, 140.6, 137.2, 134.2, 132.5, 129.0, 128.8, 128.0, 127.5, 127.4, 127.3, 127.1, 125.8, 124.6 (q,  $J_{\text{C-F}} = 282.0$  Hz), 123.8, 113.3, 106.0, 81.3, 61.4 (q,  $J_{\text{C-F}} = 25.9$  Hz), 53.0, 29.7, 28.1.  $^{19}\text{F}$  NMR (376 MHz,  $\text{CDCl}_3$ )  $\delta$  -73.37. IR ( $\text{cm}^{-1}$ )  $\nu$  3421.1, 3061.2-2929.8, 1946.3, 1716.0, 1488.6, 1289.5-1130.0, 929.6, 767.1. HRMS (ESI)  $m/z$  calcd for  $\text{C}_{32}\text{H}_{27}\text{F}_3\text{N}_2\text{NaO}_5\text{S}$   $[\text{M}+\text{Na}]^+$ : 631.1485, found 631.1471.

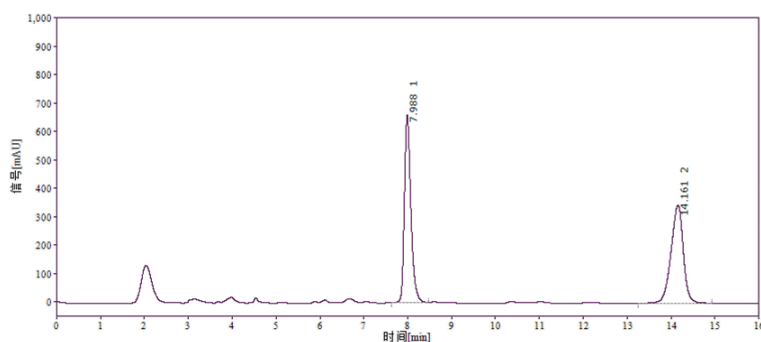

| No | Retention Time | Area     | % Area | Int Type |
|----|----------------|----------|--------|----------|
| 1  | 7.988          | 6784.480 | 50.3   | BB       |
| 2  | 14.161         | 6693.881 | 49.7   | BB       |

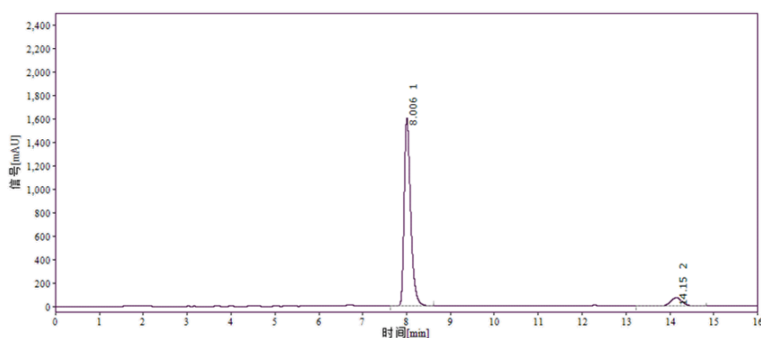

| No | Retention Time | Area     | % Area | Int Type |
|----|----------------|----------|--------|----------|
| 1  | 8.006          | 1606.918 | 92.2   | BB       |
| 2  | 14.150         | 1396.581 | 7.8    | BB       |

**Methyl (3*S*,5*S*)-2-((*tert*-butoxycarbonyl)amino)-6,6,6-trifluoro-5-(((*E*)-5-methyl-2-oxobenzo[*b*]thiophen-3(2*H*)-ylidene)amino)-4-phenylhexa-2,3-dienoate**

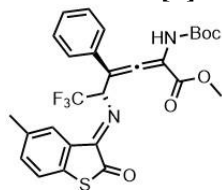

**3ab**

From 28.7 mg (0.1 mmol, 1.0 equiv) of **1a** and 31.1 mg (0.12 mmol, 1.2 equiv) of **2b**, 47.5 mg (87% yield) of compound **3ab** was obtained as a yellow solid,  $[\alpha]_D^{25} = -120$  ( $c = 1.0$ ,  $\text{CHCl}_3$ ), Mp. = 94 - 95 °C. Dr (> 20:1) was determined by HPLC analysis. 83% ee was determined by HPLC analysis (Daicel Chiralpak IA-3 column, 245 nm, hexane/2-propanol 90:10, 1.0 mL/min). Retention time:  $t_{\text{major}} = 5.6$  min,  $t_{\text{minor}} = 6.9$  min.  $^1\text{H NMR}$  (400 MHz,  $\text{CDCl}_3$ )  $\delta$  7.65 (d,  $J = 7.6$  Hz, 2H), 7.57 (d,  $J = 1.8$  Hz, 1H), 7.34 (d,  $J = 7.4$  Hz, 2H), 7.24 (d,  $J = 7.3$  Hz, 2H), 7.11 (d,  $J = 8.0$  Hz, 1H), 6.38 (q,  $J = 6.5$  Hz, 1H), 6.04 (s, 1H), 3.29 (s, 3H), 2.31 (s, 3H), 1.37 (s, 9H).  $^{13}\text{C NMR}$  (101 MHz,  $\text{CDCl}_3$ )  $\delta$  205.1, 186.0, 164.3, 156.7, 151.4, 137.5, 135.2, 133.8, 128.8, 128.6, 128.5, 127.6, 126.2, 124.6 (q,  $J_{\text{C-F}} = 281.4$  Hz), 123.5, 113.6, 105.8, 81.3, 61.4 (q,  $J_{\text{C-F}} = 28.2$  Hz), 53.0, 29.7, 28.1, 21.1.  $^{19}\text{F NMR}$  (376 MHz,  $\text{CDCl}_3$ )  $\delta$  -73.40. IR ( $\text{cm}^{-1}$ )  $\nu$  3354.2, 3058.2-2931.4, 1954.7, 1726.9-1697.4, 1503.6, 1294.7-1128.1, 952.7, 768.2. HRMS (ESI)  $m/z$  calcd for  $\text{C}_{27}\text{H}_{25}\text{F}_3\text{N}_2\text{NaO}_5\text{S}$   $[\text{M}+\text{Na}]^+$ : 569.1328, found 569.1335.

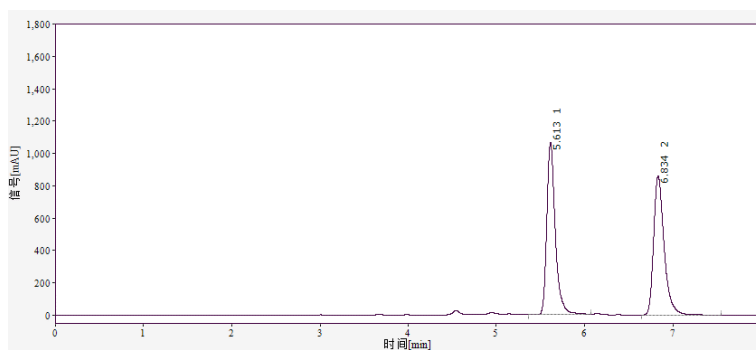

| No | Retention Time | Area     | % Area | Int Type |
|----|----------------|----------|--------|----------|
| 1  | 5.613          | 7118.399 | 49.9   | BB       |
| 2  | 6.834          | 7141.862 | 50.1   | BB       |

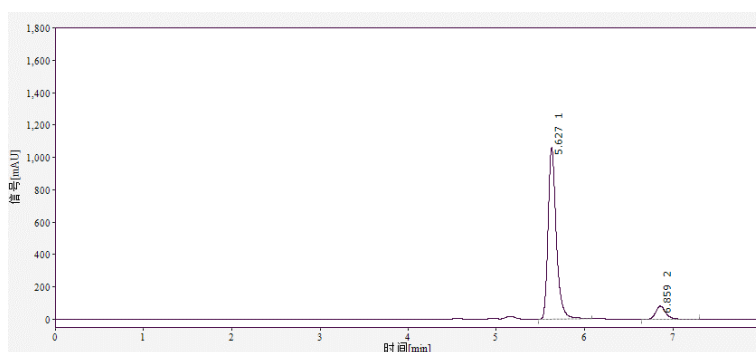

| No | Retention Time | Area     | % Area | Int Type |
|----|----------------|----------|--------|----------|
| 1  | 5.627          | 6850.227 | 91.3   | BB       |
| 2  | 6.859          | 653.473  | 8.7    | BB       |

**Methyl (3*S*,5*S*)-2-((*tert*-butoxycarbonyl)amino)-5-(((*E*)-5-(*tert*-butyl)-2-oxobenzo[*b*]thiophen-3(2*H*)-ylidene)amino)-6,6,6-trifluoro-4-phenylhexa-2,3-**

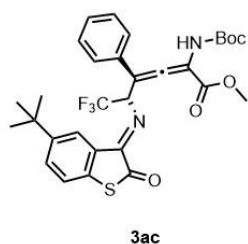

### dienoate

From 28.7 mg (0.1 mmol, 1.0 equiv) of **1a** and 36.1 mg (0.12 mmol, 1.2 equiv) of **2c**, 52.9 mg (90% yield) of compound **3ac** was obtained as a yellow solid,  $[\alpha]_D^{25} = -144$  ( $c = 1.0$ ,  $\text{CHCl}_3$ ), Mp. = 126 - 127 °C. Dr ( $> 20:1$ ) was determined by HPLC analysis. 80% ee was determined by HPLC analysis (Daicel Chiralpak IA-3 column, 245 nm, hexane/2-propanol 90:10, 1.0 mL/min). Retention time:  $t_{\text{major}} = 4.4$  min,  $t_{\text{minor}} = 5.1$  min.  $^1\text{H NMR}$  (400 MHz,  $\text{CDCl}_3$ )  $\delta$  7.79 (s, 1H), 7.72 (d,  $J = 7.7$  Hz, 2H), 7.55 (dd,  $J = 8.3, 2.2$  Hz, 1H), 7.40 (t,  $J = 7.5$  Hz, 2H), 7.36 - 7.27 (m, 1H), 7.22 (d,  $J = 5.2$  Hz, 1H), 6.55 (q,  $J = 6.5$  Hz, 1H), 6.13 (s, 1H), 3.29 (s, 3H), 1.44 (s, 9H), 1.35 (s, 9H).  $^{13}\text{C NMR}$  (101 MHz,  $\text{CDCl}_3$ )  $\delta$  205.5, 186.3, 164.2, 156.7, 151.5, 151.1, 133.9, 133.7, 131.6, 128.7, 128.6, 128.5, 127.6, 124.6 (q,  $J_{\text{C-F}} = 282.4$  Hz), 123.5, 122.6, 113.6, 105.9, 81.2, 61.1 (q,  $J_{\text{C-F}} = 28.3$  Hz), 52.9, 34.9, 31.2, 28.1.  $^{19}\text{F NMR}$  (376 MHz,  $\text{CDCl}_3$ )  $\delta$  -73.20. IR ( $\text{cm}^{-1}$ )  $\nu$  3428.8, 3084.3-2870.7, 1952.5, 1736.0-1697.9, 1488.6, 1292.3-1128.9, 1021.2, 946.1, 768.0. HRMS (ESI)  $m/z$  calcd for  $\text{C}_{30}\text{H}_{31}\text{F}_3\text{N}_2\text{NaO}_5\text{S}$   $[\text{M}+\text{Na}]^+$ : 611.1798, found 611.1797.

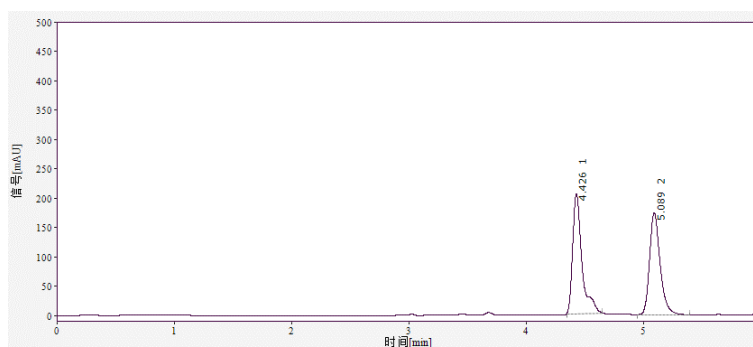

| No | Retention Time | Area     | % Area | Int Type |
|----|----------------|----------|--------|----------|
| 1  | 4.426          | 1119.025 | 50.7   | BB       |
| 2  | 5.089          | 1088.623 | 49.3   | BB       |

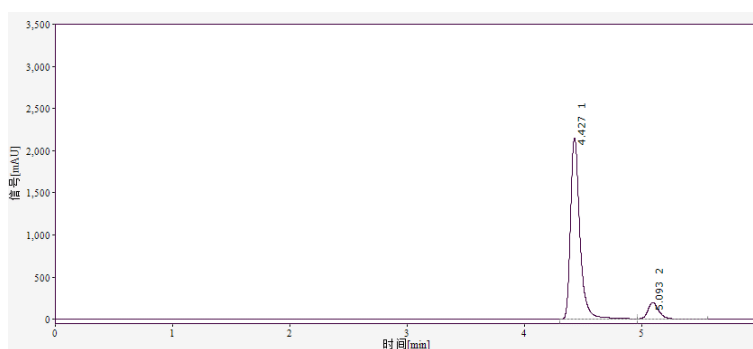

| No | Retention Time | Area      | % Area | Int Type |
|----|----------------|-----------|--------|----------|
| 1  | 4.427          | 12047.976 | 90.0   | BB       |
| 2  | 5.093          | 1338.974  | 10.0   | BB       |

**Methyl (3*S*,5*S*)-2-((*tert*-butoxycarbonyl)amino)-5-(((*E*)-5-(*tert*-butyl)-2-oxobenzo[*b*]thiophen-3(*2*H*)-ylidene)amino)-6,6,6-trifluoro-4-phenylhexa-2,3-dienoate***

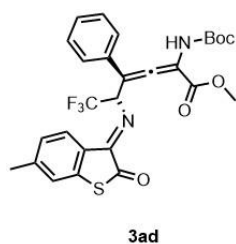

From 28.7 mg (0.1 mmol, 1.0 equiv) of **1a** and 31.1 mg (0.12 mmol, 1.2 equiv) of **2d**, 49.1 mg (90% yield) of compound **3ad** was obtained as a yellow solid,  $[\alpha]_D^{25} = -97$  ( $c = 1.0$ ,  $\text{CHCl}_3$ ), Mp. = 172 - 173 °C. Dr (> 20:1) was determined by HPLC analysis. 83% ee was determined by HPLC analysis (Daicel Chiralpak IA-3 column, 245 nm, hexane/2-propanol 99:1, 1.0 mL/min). Retention time:  $t_{\text{major}} = 16.6$  min,  $t_{\text{minor}} = 18.0$  min.  $^1\text{H}$  NMR (400 MHz,  $\text{CDCl}_3$ )  $\delta$  7.64 (dd,  $J = 7.9, 4.3$  Hz, 3H), 7.32 (t,  $J = 7.6$  Hz, 2H), 7.24 (t,  $J = 7.3$  Hz, 1H), 7.02 (d,  $J = 8.2$  Hz, 2H), 6.39 (q,  $J = 6.5$  Hz, 1H), 6.03 (s, 1H), 3.28 (s, 3H), 2.32 (s, 3H), 1.36 (s, 9H).  $^{13}\text{C}$  NMR (101 MHz,  $\text{CDCl}_3$ )  $\delta$  205.2, 186.0, 164.3, 156.3, 151.4, 145.5, 133.8, 128.6, 128.5, 128.3, 127.6, 126.7, 125.7, 124.6 (q,  $J_{\text{C-F}} = 282.9$  Hz), 124.2, 113.7, 105.8, 81.2, 61.4 (q,  $J_{\text{C-F}} = 31.9$  Hz), 53.0, 29.7, 28.1, 22.1.  $^{19}\text{F}$  NMR (376 MHz,  $\text{CDCl}_3$ )  $\delta$  -73.36. IR ( $\text{cm}^{-1}$ )  $\nu$  3427.1, 3345.8, 3059.0-2930.9, 1954.6, 1727.0-1697.5, 1503.1, 1295.1-1123.4, 1022.2, 939.7-932.2, 769.1. HRMS (ESI)  $m/z$  calcd for  $\text{C}_{27}\text{H}_{25}\text{F}_3\text{N}_2\text{NaO}_5\text{S}$   $[\text{M}+\text{Na}]^+$ : 569.1328, found 569.1314.

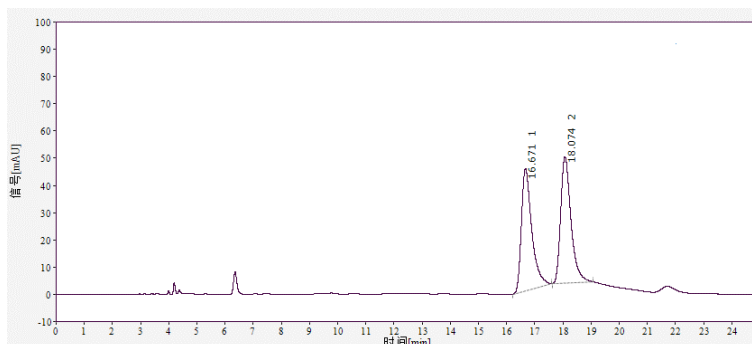

| No | Retention Time | Area     | % Area | Int Type |
|----|----------------|----------|--------|----------|
| 1  | 16.671         | 1151.558 | 49.3   | BB       |
| 2  | 18.074         | 1182.098 | 50.7   | BB       |

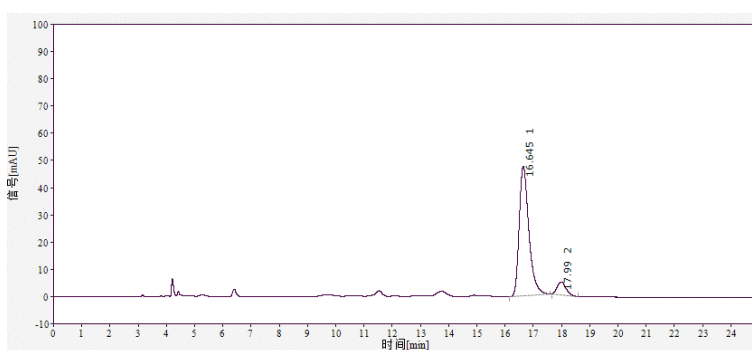

| No | Retention Time | Area     | % Area | Int Type |
|----|----------------|----------|--------|----------|
| 1  | 16.645         | 1137.300 | 91.7   | BB       |
| 2  | 17.990         | 103.555  | 8.3    | BB       |

**Methyl (3*S*,5*S*)-2-((*tert*-butoxycarbonyl)amino)-6,6,6-trifluoro-5-(((*E*)-6-methoxy-2-oxobenzo[*b*]thiophen-3(2*H*)-ylidene)amino)-4-phenylhexa-2,3-dienoate**



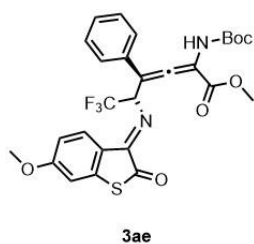

From 28.7 mg (0.1 mmol, 1.0 equiv) of **1a** and 33.0 mg (0.12 mmol, 1.2 equiv) of **2e**, 51.1 mg (91% yield) of compound **3ae** was obtained as a yellow solid,  $[\alpha]_D^{25} = -80$  ( $c = 1.0$ ,  $\text{CHCl}_3$ ), Mp. = 132 -133 °C. Dr ( $> 20:1$ ) was determined by HPLC analysis. 86% ee was determined by HPLC analysis (Daicel Chiralpak IA-3 column, 245 nm, hexane/2 -propanol 90:10, 1.0 mL/min). Retention time:  $t_{\text{major}} = 8.1$  min,  $t_{\text{minor}} = 7.4$  min.  $^1\text{H}$  NMR (400 MHz,  $\text{CDCl}_3$ )  $\delta$  7.75 – 7.61 (m, 3H), 7.31 (t,  $J = 7.6$  Hz, 2H), 7.28 – 7.19 (m, 1H), 6.79 – 6.64 (m, 2H), 6.36 (q,  $J = 6.5$  Hz, 1H), 6.04 (s, 1H), 3.78 (s, 3H), 3.30 (s, 3H), 1.36 (s, 9H).  $^{13}\text{C}$  NMR (101 MHz,  $\text{CDCl}_3$ )  $\delta$  205.2, 185.9, 164.3, 164.3, 155.5, 151.4, 139.2, 133.8, 128.5, 128.4, 127.6, 124.7 (q,  $J_{\text{C-F}} = 282.4$  Hz), 122.3, 113.8, 113.3, 109.1, 105.8, 81.2, 61.2 (q,  $J_{\text{C-F}} = 27.1$  Hz), 55.8, 53.0, 29.7, 28.1.  $^{19}\text{F}$  NMR (376 MHz,  $\text{CDCl}_3$ )  $\delta$  -73.37. IR ( $\text{cm}^{-1}$ )  $\nu$  3426.2, 3346.1, 3061.4-2844.4, 1955.1, 1727.4-1713.1, 1596.7, 1489.8, 1294.0-1122.4, 940.0-931.9, 768.2, 696.3. HRMS (ESI)  $m/z$  calcd for  $\text{C}_{27}\text{H}_{25}\text{F}_3\text{N}_2\text{NaO}_6\text{S}$   $[\text{M}+\text{Na}]^+$ : 585.1278, found 585.1269.

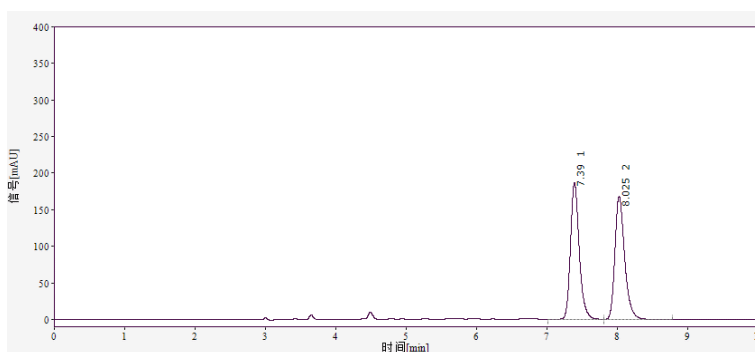

| No | Retention Time | Area     | % Area | Int Type |
|----|----------------|----------|--------|----------|
| 1  | 7.390          | 1630.636 | 50.0   | BB       |
| 2  | 8.025          | 1628.279 | 50.0   | BB       |

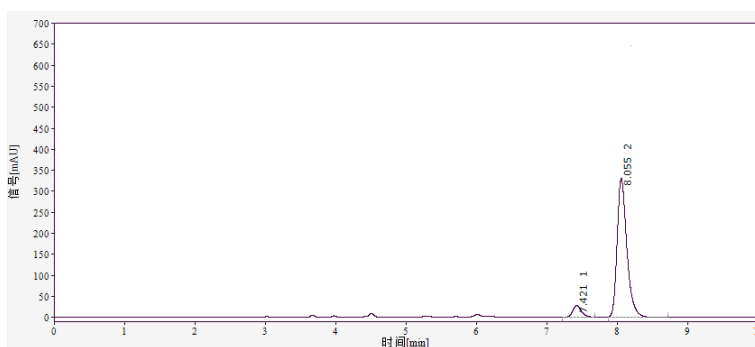

| No | Retention Time | Area     | % Area | Int Type |
|----|----------------|----------|--------|----------|
| 1  | 7.421          | 241.632  | 7.1    | BB       |
| 2  | 8.055          | 3168.765 | 92.9   | BB       |

**Methyl (3*S*,5*S*)-2-((*tert*-butoxycarbonyl)amino)-6,6,6-trifluoro-5-(((*E*)-6-fluoro-2-oxobenzo[*b*]thiophen-3(2*H*)-ylidene)amino)-4-phenylhexa-2,3-dienoate**

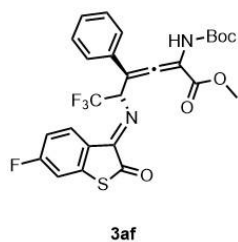

From 28.7 mg (0.1 mmol, 1.0 equiv) of **1a** and 31.6 mg (0.12 mmol, 1.2 equiv) of **2f**, 45.1 mg (82% yield) of compound **3af** was obtained as a yellow solid,  $[\alpha]_D^{25} = -68$  ( $c = 1.0$ ,  $\text{CHCl}_3$ ), Mp. = 121 - 122 °C. Dr (> 20:1) was determined by HPLC analysis. 77% ee was determined by HPLC analysis (Daicel Chiralpak IA-3 column, 245 nm, hexane/2-propanol 90:10, 1.0 mL/min).

Retention time:  $t_{\text{major}} = 5.9$  min,  $t_{\text{minor}} = 6.4$  min.  $^1\text{H NMR}$  (400 MHz,  $\text{CDCl}_3$ )  $\delta$  7.85 – 7.74 (m, 1H), 7.63 (d,  $J = 7.7$  Hz, 2H), 7.37 – 7.28 (m, 2H), 7.25 (t,  $J = 7.3$  Hz, 1H), 7.06 – 6.88 (m, 2H), 6.37 (q,  $J = 6.5$  Hz, 1H), 6.03 (s, 1H), 3.32 (s, 3H), 1.37 (s, 9H).  $^{13}\text{C NMR}$  (101 MHz,  $\text{CDCl}_3$ )  $\delta$  205.1, 184.5, 167.2, 164.7, 164.2, 155.1, 151.4, 139.5, 139.4, 133.6, 128.6, 128.5, 128.1, 128.0, 127.6, 125.3, 125.3, 124.5 (q,  $J_{\text{C-F}} = 282.0$  Hz), 115.1, 114.9, 113.5, 111.6, 111.3, 105.8, 81.3, 61.5 (q,  $J_{\text{C-F}} = 28.8$  Hz), 53.0, 28.1.  $^{19}\text{F NMR}$  (376 MHz,  $\text{CDCl}_3$ )  $\delta$  -73.30, -101.22. IR ( $\text{cm}^{-1}$ )  $\nu$  3423.7, 3343.6, 3066.3-2931.0, 1955.6, 1725.7-1713.2, 1505.6, 1296.0-1123.0, 943.3-935.7, 768.4. HRMS (ESI)  $m/z$  calcd for  $\text{C}_{26}\text{H}_{22}\text{F}_4\text{N}_2\text{NaO}_5\text{S}$   $[\text{M}+\text{Na}]^+$ : 573.1078, found 573.1078.

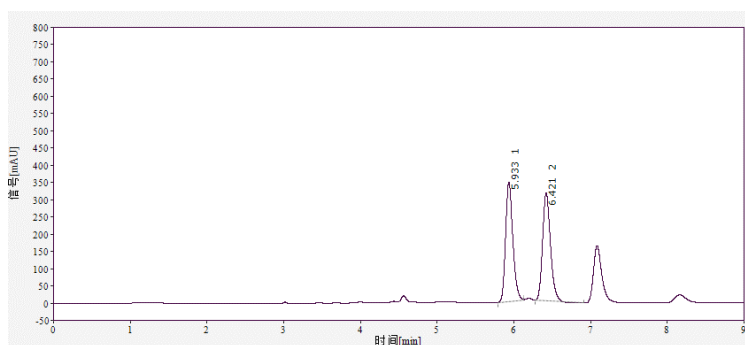

| No | Retention Time | Area     | % Area | Int Type |
|----|----------------|----------|--------|----------|
| 1  | 5.933          | 2264.715 | 50.3   | BB       |
| 2  | 6.421          | 2238.192 | 49.7   | BB       |

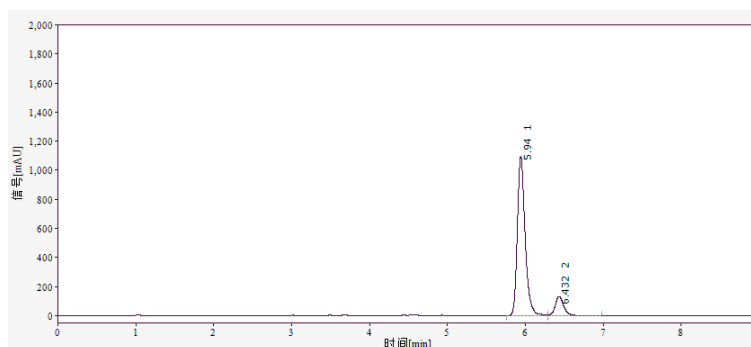

| No | Retention Time | Area     | % Area | Int Type |
|----|----------------|----------|--------|----------|
| 1  | 5.940          | 7593.366 | 88.4   | BB       |
| 2  | 6.432          | 995.711  | 11.6   | BB       |

**Methyl (3*S*,5*S*)-2-((*tert*-butoxycarbonyl)amino)-5-(((*E*)-5,7-dimethyl-2-oxobenzo[*b*]thiophen-3(2*H*)-ylidene)amino)-6,6,6-trifluoro-4-phenylhexa-2,3-dienoate**

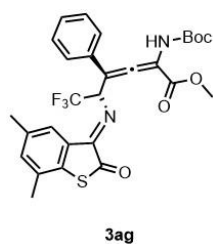

From 28.7 mg (0.1 mmol, 1.0 equiv) of **1a** and 32.8 mg (0.12 mmol, 1.2 equiv) of **2g**, 50.4 mg (90% yield) of compound **3ag** was obtained as a yellow solid,  $[\alpha]_D^{25} = -110$  ( $c = 1.0$ ,  $\text{CHCl}_3$ ), Mp. = 89 - 90 °C. Dr (> 20:1) was determined by HPLC analysis. 88% ee was determined by HPLC analysis (Daicel Chiralpak IA-3 column, 245 nm, hexane/2-propanol 90:10, 1.0 mL/min). Retention time:  $t_{\text{major}} = 5.1$  min,  $t_{\text{minor}} = 5.8$  min.  $^1\text{H NMR}$  (400 MHz,  $\text{CDCl}_3$ )  $\delta$  7.65 (d,  $J = 7.7$  Hz, 2H), 7.40 (s, 1H), 7.32 (t,  $J = 7.6$  Hz, 2H), 7.28 – 7.20 (m, 1H), 7.07 (s, 1H), 6.38 (q,  $J = 6.5$  Hz, 1H), 6.04 (s, 1H), 3.27 (s, 3H), 2.27 (s, 3H), 2.15 (s, 3H), 1.36 (s, 9H).  $^{13}\text{C NMR}$  (101 MHz,  $\text{CDCl}_3$ )  $\delta$  205.1, 186.2, 164.3, 157.3, 151.4, 137.3, 136.0, 133.8, 133.4, 132.5, 128.9, 128.6, 128.5, 127.6, 124.6 (q,  $J_{\text{C-F}} = 282.4$  Hz), 123.5, 113.6, 105.8, 81.3, 61.5 (q,  $J_{\text{C-F}} = 28.2$  Hz), 52.9, 29.7, 28.1, 20.9, 19.2.  $^{19}\text{F NMR}$  (376 MHz,  $\text{CDCl}_3$ )  $\delta$  -73.37. IR ( $\text{cm}^{-1}$ )  $\nu$  3406.1, 3057.0-2930.7, 1954.8, 1719.9, 1292.2-1131.7, 879.6, 767.2. HRMS (ESI)  $m/z$  calcd for  $\text{C}_{28}\text{H}_{27}\text{F}_3\text{N}_2\text{NaO}_5\text{S}$   $[\text{M}+\text{Na}]^+$ : 583.1485, found 583.1484.

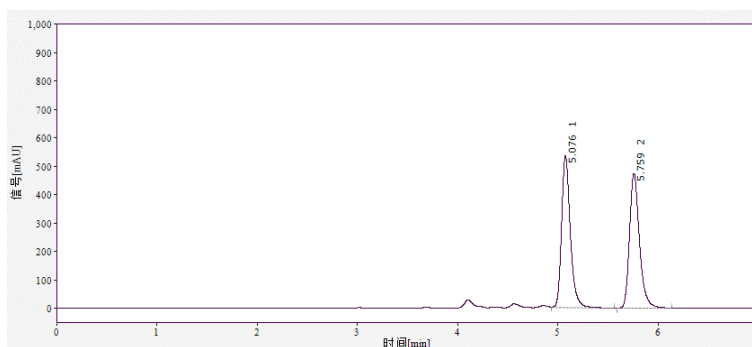

| No | Retention Time | Area     | % Area | Int Type |
|----|----------------|----------|--------|----------|
| 1  | 5.076          | 3218.064 | 49.7   | BB       |
| 2  | 5.759          | 3253.889 | 50.3   | BB       |

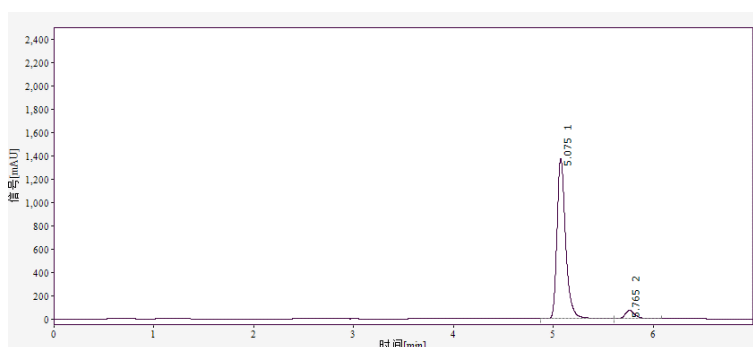

| No | Retention Time | Area     | % Area | Int Type |
|----|----------------|----------|--------|----------|
| 1  | 5.075          | 8299.005 | 94.2   | BB       |
| 2  | 5.765          | 510.566  | 5.8    | BB       |

**Methyl (3S,5S)-5-(((E)-1-acetyl-2-oxoindolin-3-ylidene)amino)-2-((tert-butoxycarbonyl)amino)-6,6,6-trifluoro-4-phenylhexa-2,3-dienoate**

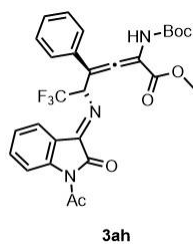

From 28.7 mg (0.1 mmol, 1.0 equiv) of **1a** and 32.4 mg (0.12 mmol, 1.2 equiv) of **2h**, 45.7 mg (82% yield) of compound **3ah** was obtained as a yellow solid,  $[\alpha]_D^{25} = -40$  ( $c = 1.0$ ,  $\text{CHCl}_3$ ), Mp. = 77 – 78 °C. Dr (> 20:1) was determined by HPLC analysis. 88% ee was determined by HPLC analysis (Daicel Chiralpak IA-3 column, 245 nm, hexane/2-propanol 90:10, 1.0 mL/min). Retention time:  $t_{\text{major}} = 6.8$  min,  $t_{\text{minor}} = 12.5$  min.  $^1\text{H NMR}$  (400 MHz,  $\text{CDCl}_3$ )  $\delta$  8.18 (d,  $J = 8.2$  Hz, 1H), 7.82 – 7.64 (m, 3H), 7.45 (t,  $J = 7.2$  Hz, 1H), 7.34 (t,  $J = 7.5$  Hz, 2H), 7.30 – 7.14 (m, 3H), 6.68 (q,  $J = 6.6$  Hz, 1H), 6.02 (s, 1H), 3.17 (s, 3H), 2.62 (s, 3H), 1.36 (s, 9H).  $^{13}\text{C NMR}$  (101 MHz,  $\text{CDCl}_3$ )  $\delta$  205.3, 170.2, 163.9, 157.9, 153.8, 151.3, 143.0, 134.4, 133.8, 128.6, 127.9, 127.2 (q,  $J_{\text{C-F}} = 254.7$  Hz), 122.9, 121.9, 116.9, 114.0, 105.8, 81.2, 61.5 (q,  $J_{\text{C-F}} = 32.1$  Hz), 52.8, 29.7, 28.1, 26.7.  $^{19}\text{F NMR}$  (376 MHz,  $\text{CDCl}_3$ )  $\delta$  -72.91. IR ( $\text{cm}^{-1}$ )  $\nu$  3443.0, 3129.9-2935.0, 1948.0, 1754.1-1723.2, 1409.4, 1274.4-1128.8, 764.7. HRMS (ESI)  $m/z$  calcd for  $\text{C}_{28}\text{H}_{26}\text{F}_3\text{N}_3\text{NaO}_6$   $[\text{M}+\text{Na}]^+$ : 580.1666, found 580.1665.

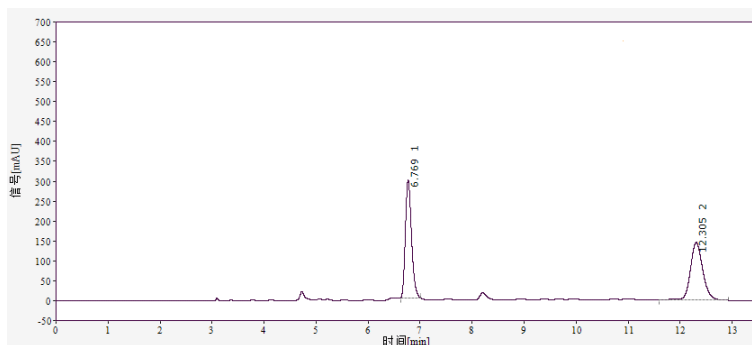

| No | Retention Time | Area     | % Area | Int Type |
|----|----------------|----------|--------|----------|
| 1  | 6.769          | 2440.985 | 50.5   | BB       |
| 2  | 12.305         | 2393.897 | 49.5   | BB       |

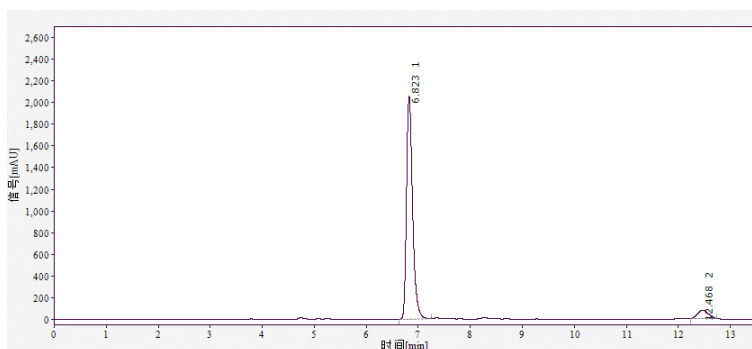

| No | Retention Time | Area      | % Area | Int Type |
|----|----------------|-----------|--------|----------|
| 1  | 6.823          | 16748.179 | 93.8   | BB       |
| 2  | 12.468         | 1110.501  | 6.2    | BB       |

**Methyl (3*S*,5*S*)-5-(((*E*)-1-acetyl-4-chloro-2-oxoindolin-3-ylidene)amino)-2-((*tert*-butoxycarbonyl)amino)-6,6,6-trifluoro-4-phenylhexa-2,3-dienoate**

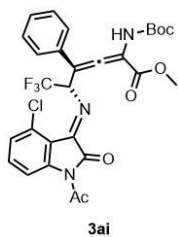

**3ai**

From 28.7 mg (0.1 mmol, 1.0 equiv) of **1a** and 36.5 mg (0.12 mmol, 1.2 equiv) of **2i**, 51.4 mg (87% yield) of compound **3ai** was obtained as a yellow solid,  $[\alpha]_D^{25} = -120$  ( $c = 1.0$ ,  $\text{CHCl}_3$ ), Mp. = 69 - 70 °C. Dr (> 20:1) was determined by HPLC analysis. 80% ee was determined by HPLC analysis (Daicel Chiralpak IC column, 245 nm, hexane/2 - propanol 90:10, 0.5 mL/min). Retention time:  $t_{\text{major}} = 15.0$  min,  $t_{\text{minor}} = 16.7$  min.  $^1\text{H NMR}$  (400 MHz,  $\text{CDCl}_3$ )  $\delta$  8.13 (d,  $J = 8.2$  Hz, 1H), 7.69 (d,  $J = 7.6$  Hz, 2H), 7.52 – 7.10 (m, 6H), 6.85 (q,  $J = 6.6$  Hz, 1H), 6.06 (s, 1H), 3.22 (s, 3H), 2.60 (s, 3H), 1.33 (s, 9H).  $^{13}\text{C NMR}$  (101 MHz,  $\text{CDCl}_3$ )  $\delta$  206.2, 170.1, 164.0, 156.8, 152.2, 151.5, 144.1, 134.1, 133.5, 131.9, 128.5, 128.5, 128.0, 124.5 (q,  $J_{\text{C-F}} = 282.8$  Hz), 118.3, 115.0, 113.5, 105.7, 81.1, 62.0 (q,  $J_{\text{C-F}} = 32.7$  Hz), 52.7, 29.7, 28.1, 26.9.  $^{19}\text{F NMR}$  (376 MHz,  $\text{CDCl}_3$ )  $\delta$  -72.89. IR ( $\text{cm}^{-1}$ )  $\nu$  3424.1, 3128.9-2872.8, 1949.3, 1755.8-1719.8, 1594.5, 1494.7, 1269.9-1128.0, 1045.1-1022.8, 786.8-765.4. HRMS (ESI)  $m/z$  calcd for  $\text{C}_{28}\text{H}_{25}\text{ClF}_3\text{N}_3\text{NaO}_6$   $[\text{M}+\text{Na}]^+$ : 614.1276, found 614.1284.

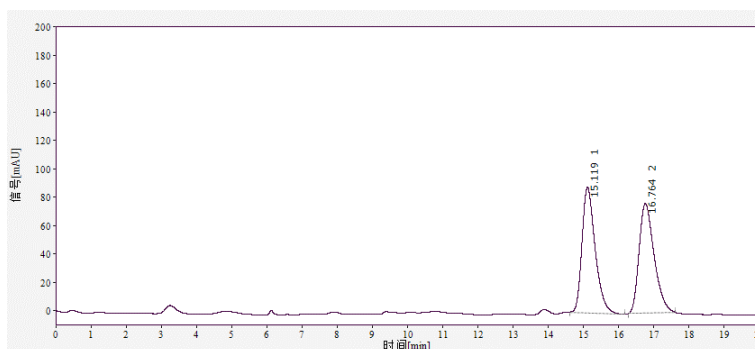

| No | Retention Time | Area     | % Area | Int Type |
|----|----------------|----------|--------|----------|
| 1  | 15.119         | 2302.116 | 50     | BB       |
| 2  | 16.764         | 2305.343 | 50     | BB       |

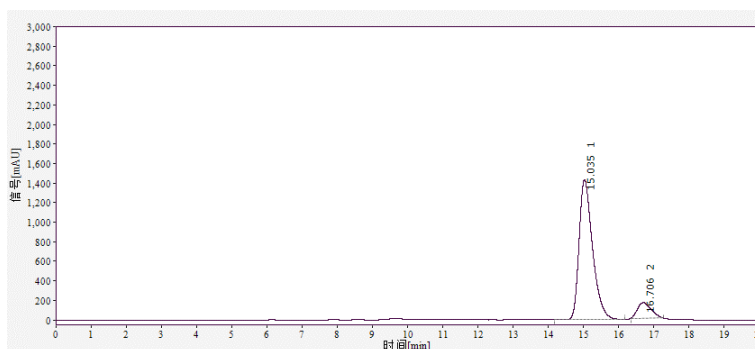

| No | Retention Time | Area      | % Area | Int Type |
|----|----------------|-----------|--------|----------|
| 1  | 15.035         | 38091.044 | 89.8   | BB       |
| 2  | 16.706         | 4307.423  | 10.2   | BB       |

**Methyl (3*S*,5*S*)-5-(((*E*)-1-acetyl-5-fluoro-2-oxoindolin-3-ylidene)amino)-2-((*tert*-butoxycarbonyl)amino)-6,6,6-trifluoro-4-phenylhexa-2,3-dienoate**

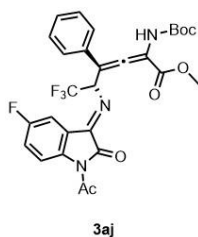

From 28.7 mg (0.1 mmol, 1.0 equiv) of **1a** and 34.6 mg (0.12 mmol, 1.2 equiv) of **2j**, 47.7 mg (83% yield) of compound **3aj** was obtained as a yellow solid,  $[\alpha]_D^{25} = -16$  ( $c = 1.0$ ,  $\text{CHCl}_3$ ), Mp. = 64 - 65 °C. Dr (> 20:1) was determined by HPLC analysis. 70% ee was determined by HPLC analysis (Daicel Chiralpak IC column, 245 nm, hexane/2-propanol 90:10, 0.5 mL/min). Retention time:  $t_{\text{major}} = 12.3$  min,  $t_{\text{minor}} = 12.9$  min.  $^1\text{H}$  NMR (400 MHz,  $\text{CDCl}_3$ )  $\delta$  8.27 (dd,  $J = 8.9, 4.2$  Hz, 1H), 7.76 (d,  $J = 7.6$  Hz, 2H), 7.53 (dd,  $J = 7.0, 2.9$  Hz, 1H), 7.41 (t,  $J = 7.6$  Hz, 2H), 7.38 - 7.29 (m, 1H), 7.28 - 7.18 (m, 1H), 6.73 (q,  $J = 6.6$  Hz, 1H), 6.11 (s, 1H), 3.31 (s, 3H), 2.68 (s, 3H), 1.44 (s, 9H).  $^{13}\text{C}$  NMR (101 MHz,  $\text{CDCl}_3$ )  $\delta$  205.2, 170.0, 163.8, 161.7, 159.2, 157.5, 153.3, 153.3, 151.3, 139.2, 139.2, 133.7, 128.6, 128.5, 127.9, 124.4 (q,  $J_{\text{C-F}} = 282.4$  Hz), 123.5, 123.4, 121.1, 120.9, 118.7, 118.6, 113.8, 109.8, 109.5, 105.7, 81.2, 61.9 (q,  $J_{\text{C-F}} = 27.5$  Hz), 52.8, 29.7, 28.1, 26.6.  $^{19}\text{F}$  NMR (376 MHz,  $\text{CDCl}_3$ )  $\delta$  -72.80, -114.60. IR ( $\text{cm}^{-1}$ )  $\nu$  3425.3, 3132.8-2873.3, 1949.6, 1758.4-1719.5, 1483.9, 1293.5-1127.7, 878.2, 765.9. HRMS (ESI)  $m/z$  calcd for  $\text{C}_{28}\text{H}_{25}\text{F}_4\text{N}_3\text{NaO}_6$   $[\text{M}+\text{Na}]^+$ : 598.1572, found 598.1566.

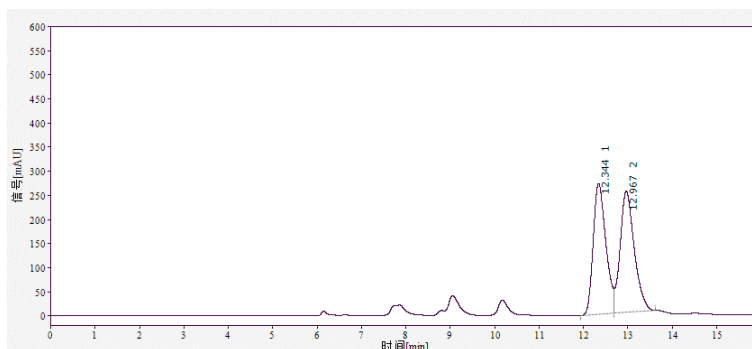

| No | Retention Time | Area     | % Area | Int Type |
|----|----------------|----------|--------|----------|
| 1  | 12.344         | 5398.054 | 49.2   | BB       |
| 2  | 12.967         | 5574.220 | 50.8   | BB       |

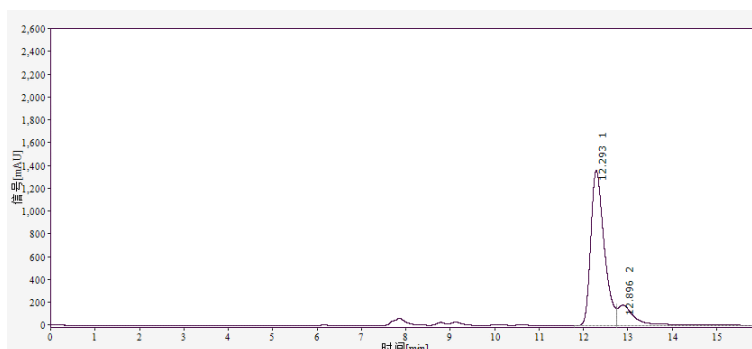

| No | Retention Time | Area      | % Area | Int Type |
|----|----------------|-----------|--------|----------|
| 1  | 12.293         | 28579.826 | 85.1   | BB       |
| 2  | 12.896         | 5019.568  | 14.9   | BB       |

**Methyl (3*S*,5*S*)-5-(((*E*)-1-acetyl-5-chloro-2-oxoindolin-3-ylidene)amino)-2-((*tert*-butoxycarbonyl)amino)-6,6,6-trifluoro-4-phenylhexa-2,3-dienoate**

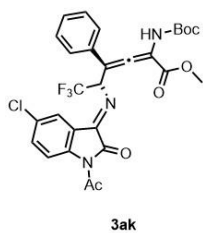

From 28.7 mg (0.1 mmol, 1.0 equiv) of **1a** and 36.5 mg (0.12 mmol, 1.2 equiv) of **2k**, 50.8 mg (86% yield) of compound **3ak** was obtained as a yellow solid,  $[\alpha]_D^{25} = -55$  ( $c = 1.0$ ,  $\text{CHCl}_3$ ), Mp. = 72 - 73 °C. Dr (> 20:1) was determined by HPLC analysis. 83% ee was determined by HPLC analysis (Daicel Chiralpak IC column, 245 nm, hexane/2-propanol 90:10, 0.5 mL/min). Retention time:  $t_{\text{major}} = 13.6$  min,  $t_{\text{minor}} = 14.7$  min.  $^1\text{H}$  NMR (400 MHz,  $\text{CDCl}_3$ )  $\delta$  8.23 (d,  $J = 8.7$  Hz, 1H), 7.78 (dd,  $J = 26.1, 5.0$  Hz, 3H), 7.49 (d,  $J = 6.4$  Hz, 1H), 7.45 – 7.37 (m, 2H), 7.38 – 7.29 (m, 1H), 6.71 (q,  $J = 6.6$  Hz, 1H), 6.11 (s, 1H), 3.33 (s, 3H), 2.68 (s, 3H), 1.44 (s, 9H).  $^{13}\text{C}$  NMR (101 MHz,  $\text{CDCl}_3$ )  $\delta$  205.2, 170.0, 163.8, 157.3, 153.0, 151.3, 141.4, 134.1, 133.7, 131.9, 128.6, 128.5, 127.9, 124.4 (q,  $J_{\text{C-F}} = 282.7$  Hz), 123.2, 122.7, 118.3, 113.8, 105.7, 81.2, 61.9 (q,  $J_{\text{C-F}} = 25.2$  Hz), 52.9, 29.7, 28.1, 26.6.  $^{19}\text{F}$  NMR (376 MHz,  $\text{CDCl}_3$ )  $\delta$  -72.75. IR ( $\text{cm}^{-1}$ )  $\nu$  3424.1, 3059.8-2873.0, 1948.8, 1757.9-1720.2, 1493.7-1467.3, 1289.6-1129.7, 766.2. HRMS (ESI)  $m/z$  calcd for  $\text{C}_{28}\text{H}_{25}\text{ClF}_3\text{N}_3\text{NaO}_6$   $[\text{M}+\text{Na}]^+$ : 614.1276, found 614.1267.

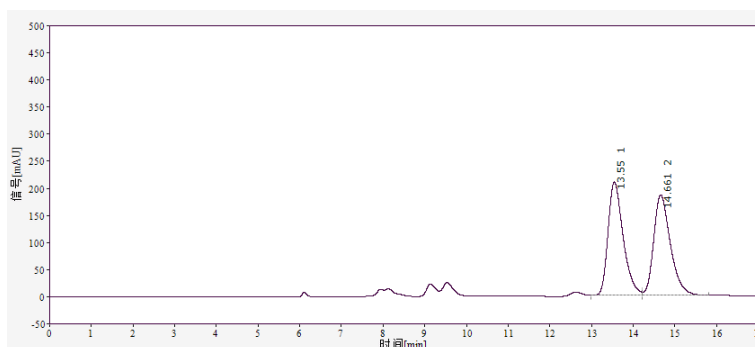

| No | Retention Time | Area     | % Area | Int Type |
|----|----------------|----------|--------|----------|
| 1  | 13.550         | 5289.472 | 50.5   | BB       |
| 2  | 14.661         | 5182.987 | 49.5   | BB       |

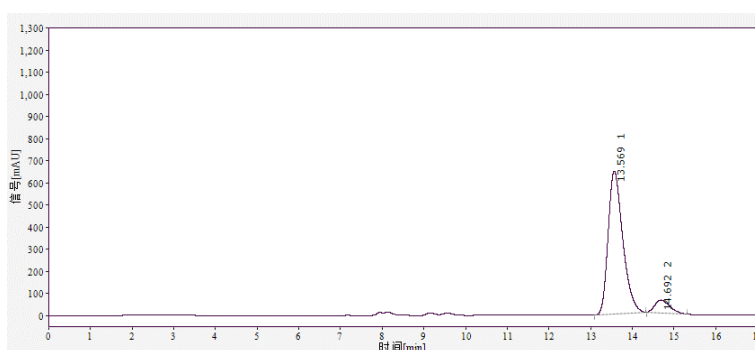

| No | Retention Time | Area      | % Area | Int Type |
|----|----------------|-----------|--------|----------|
| 1  | 13.569         | 15745.032 | 91.7   | BB       |
| 2  | 14.692         | 1429.660  | 8.3    | BB       |

**Methyl (3*S*,5*S*)-5-(((*E*)-1-acetyl-5-bromo-2-oxindolin-3-ylidene)amino)-2-((*tert*-butoxycarbonyl)amino)-6,6,6-trifluoro-4-phenylhexa-2,3-dienoate**

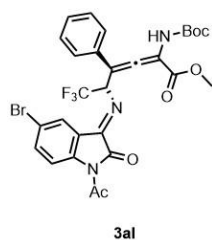

3al

From 28.7 mg (0.1 mmol, 1.0 equiv) of **1a** and 41.8 mg (0.12 mmol, 1.2 equiv) of **2l**, 59.7 mg (94% yield) of compound **3al** was obtained as a yellow solid,  $[\alpha]_D^{25} = -61$  ( $c = 1.0$ ,  $\text{CHCl}_3$ ), Mp. = 83 - 84 °C. Dr (> 20:1) was determined by HPLC analysis. 83% ee was determined by HPLC analysis (Daicel Chiralpak IC column, 245 nm, hexane/2-propanol 98:2, 0.5 mL/min). Retention time:  $t_{\text{major}} = 21.7$  min,  $t_{\text{minor}} = 23.6$  min.  $^1\text{H NMR}$  (400 MHz,  $\text{CDCl}_3$ )  $\delta$  8.08 (d,  $J = 8.6$  Hz, 1H), 7.87 (d,  $J = 2.2$  Hz, 1H), 7.67 (d,  $J = 7.7$  Hz, 2H), 7.59 – 7.52 (m, 1H), 7.28 (dt,  $J = 31.0$ , 7.4 Hz, 3H), 6.63 (q,  $J = 6.6$  Hz, 1H), 6.04 (s, 1H), 3.25 (s, 3H), 2.59 (s, 3H), 1.35 (s, 9H).  $^{13}\text{C NMR}$  (101 MHz,  $\text{CDCl}_3$ )  $\delta$  205.2, 170.0, 163.8, 157.1, 152.9, 151.3, 141.9, 137.0, 133.7, 128.6, 127.9, 125.6, 124.4 (q,  $J_{\text{C-F}} = 282.8$  Hz), 123.5, 119.3, 118.6, 113.8, 105.8, 81.3, 62.0 (q,  $J_{\text{C-F}} = 29.2$  Hz), 52.9, 28.1, 26.6.  $^{19}\text{F NMR}$  (376 MHz,  $\text{CDCl}_3$ )  $\delta$  -72.75. IR ( $\text{cm}^{-1}$ )  $\nu$  3423.8, 2958.5-2858.0, 1757.5-1719.9, 1494.1-1464.4, 1288.9-1129.6. HRMS (ESI)  $m/z$  calcd for  $\text{C}_{28}\text{H}_{25}\text{BrF}_3\text{N}_3\text{NaO}_6$   $[\text{M}+\text{Na}]^+$ : 658.0771, found 658.0760.

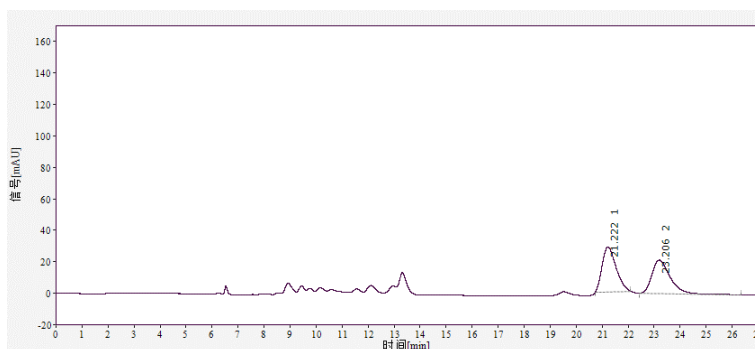

| No | Retention Time | Area     | % Area | Int Type |
|----|----------------|----------|--------|----------|
| 1  | 21.222         | 1047.624 | 50.4   | BB       |
| 2  | 23.206         | 1031.613 | 49.6   | BB       |

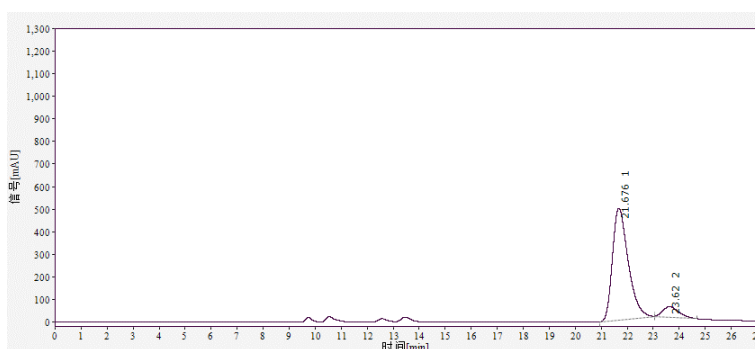

| No | Retention Time | Area      | % Area | Int Type |
|----|----------------|-----------|--------|----------|
| 1  | 21.676         | 20777.769 | 91.5   | BB       |
| 2  | 23.620         | 1936.248  | 8.5    | BB       |

**Methyl (3*S*,5*S*)-5-(((*E*)-1-acetyl-5-methyl-2-oxoindolin-3-ylidene)amino)-2-((*tert*-butoxycarbonyl)amino)-6,6,6-trifluoro-4-phenylhexa-2,3-dienoate**



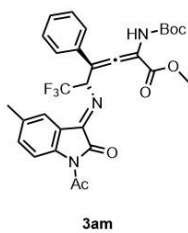

From 28.7 mg (0.1 mmol, 1.0 equiv) of **1a** and 34.1 mg (0.12 mmol, 1.2 equiv) of **2m**, 43.4 mg (76% yield) of compound **3am** was obtained as a yellow solid,  $[\alpha]_D^{25} = -41$  ( $c = 1.0$ ,  $\text{CHCl}_3$ ), Mp. = 85 - 86 °C. Dr (> 20:1) was determined by HPLC analysis. 84% ee was determined by HPLC analysis (Daicel Chiralpak IC column, 245 nm, hexane/2-propanol 90:10, 1.0 mL/min). Retention time:  $t_{\text{major}} = 7.3$  min,  $t_{\text{minor}} = 8.3$  min.  $^1\text{H NMR}$  (400 MHz,  $\text{CDCl}_3$ )  $\delta$  8.05 (d,  $J = 8.3$  Hz, 1H), 7.70 (d,  $J = 7.5$  Hz, 2H), 7.58 (s, 1H), 7.30 (dt,  $J = 31.2, 7.6$  Hz, 4H), 6.65 (q,  $J = 6.6$  Hz, 1H), 6.03 (s, 1H), 3.18 (s, 3H), 2.60 (s, 3H), 2.31 (s, 3H), 1.37 (s, 9H).  $^{13}\text{C NMR}$  (101 MHz,  $\text{CDCl}_3$ )  $\delta$  205.2, 170.0, 164.0, 158.1, 153.9, 140.9, 136.0, 135.1, 133.8, 128.5, 128.5, 127.9, 124.6 (q,  $J_{\text{C-F}} = 283.1$  Hz), 123.0, 121.8, 116.7, 114.0, 105.7, 81.2, 61.5 (q,  $J_{\text{C-F}} = 27.0$  Hz), 52.8, 29.7, 28.1, 26.6, 20.9.  $^{19}\text{F NMR}$  (376 MHz,  $\text{CDCl}_3$ )  $\delta$  -72.96. IR ( $\text{cm}^{-1}$ )  $\nu$  3425.7, 2959.7-2930.5, 1949.0, 1756.5-1719.4, 1488.0, 1302.9-1127.3. HRMS (ESI)  $m/z$  calcd for  $\text{C}_{29}\text{H}_{28}\text{F}_3\text{N}_3\text{NaO}_6$   $[\text{M}+\text{Na}]^+$ : 594.1822, found 594.1814.

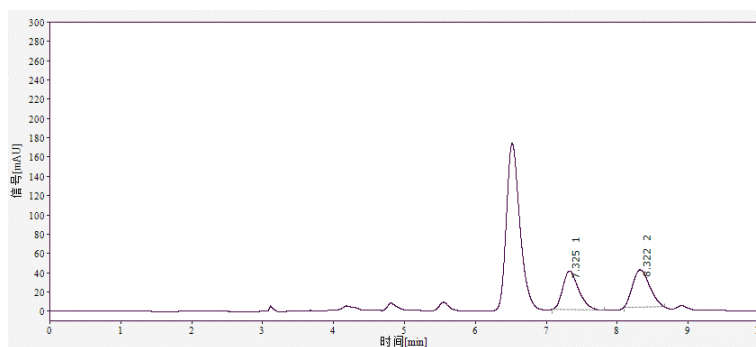

| No | Retention Time | Area    | % Area | Int Type |
|----|----------------|---------|--------|----------|
| 1  | 7.325          | 626.813 | 49.4   | BB       |
| 2  | 8.322          | 642.796 | 50.6   | BB       |

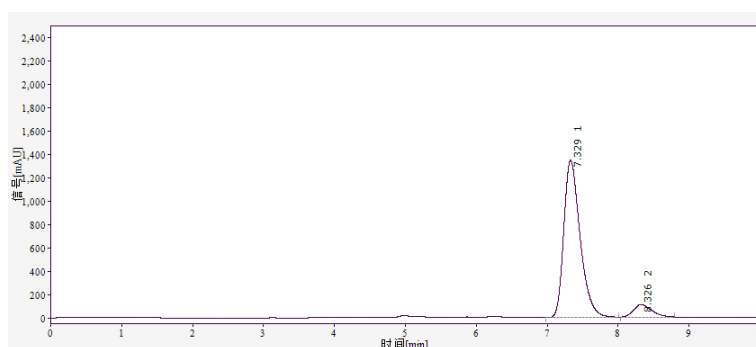

| No | Retention Time | Area      | % Area | Int Type |
|----|----------------|-----------|--------|----------|
| 1  | 7.329          | 21474.496 | 91.9   | BB       |
| 2  | 8.326          | 1892.464  | 8.1    | BB       |

**Methyl (3*S*,5*S*)-5-(((*E*)-1-acetyl-6-chloro-2-oxoindolin-3-ylidene)amino)-2-((*tert*-butoxycarbonyl)amino)-6,6,6-trifluoro-4-phenylhexa-2,3-dienoate**

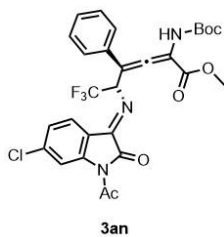

From 28.7 mg (0.1 mmol, 1.0 equiv) of **1a** and 36.5 mg (0.12 mmol, 1.2 equiv) of **2n**, 49.6 mg (84% yield) of compound **3an** was obtained as a yellow solid,  $[\alpha]_D^{25} = -25$  ( $c = 1.0$ ,  $\text{CHCl}_3$ ), Mp. = 75 - 76 °C. Dr (> 20:1) was determined by HPLC analysis. 80% ee was determined by HPLC analysis (Daicel Chiralpak IC column, 245 nm, hexane/2-propanol 90:10, 1.0 mL/min). Retention time:  $t_{\text{major}} = 7.1$  min,  $t_{\text{minor}} = 8.7$  min.  $^1\text{H NMR}$  (400 MHz,  $\text{CDCl}_3$ )  $\delta$  8.33 (d,  $J = 1.8$  Hz, 1H), 7.76 (dd,  $J = 10.5, 7.8$  Hz, 3H), 7.46 – 7.36 (m, 2H), 7.37 – 7.29 (m, 1H), 7.27 (dd,  $J = 8.2, 1.8$  Hz, 1H), 6.71 (q,  $J = 6.6$  Hz, 1H), 6.10 (s, 1H), 3.31 (s, 3H), 2.69 (s, 3H), 1.43 (s, 9H).  $^{13}\text{C NMR}$  (101 MHz,  $\text{CDCl}_3$ )  $\delta$  205.2, 170.0, 163.8, 157.4, 153.0, 151.3, 143.5, 133.7, 129.3, 128.9, 128.6, 128.5, 127.9, 124.4 (q,  $J_{\text{C-F}} = 283.4$  Hz), 123.9, 120.7, 120.3, 113.8, 105.7, 81.3, 61.8 (q,  $J_{\text{C-F}} = 25.0$  Hz), 52.9, 28.1, 26.6.  $^{19}\text{F NMR}$  (376 MHz,  $\text{CDCl}_3$ )  $\delta$  -72.81. IR ( $\text{cm}^{-1}$ )  $\nu$  3424.6, 3129.9-2872.4, 1948.9, 1757.1-1720.0, 1494.6, 1275.4-1129.8. HRMS (ESI)  $m/z$  calcd for  $\text{C}_{28}\text{H}_{25}\text{ClF}_3\text{N}_3\text{NaO}_6$   $[\text{M}+\text{Na}]^+$ : 614.1276, found 614.1256.

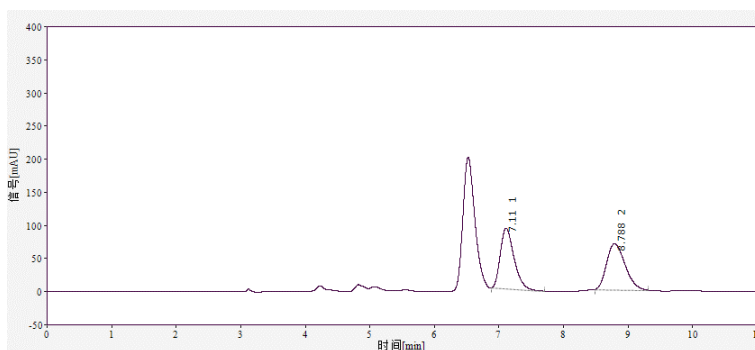

| No | Retention Time | Area     | % Area | Int Type |
|----|----------------|----------|--------|----------|
| 1  | 7.110          | 1361.739 | 49.5   | BB       |
| 2  | 6.788          | 1387.869 | 50.5   | BB       |

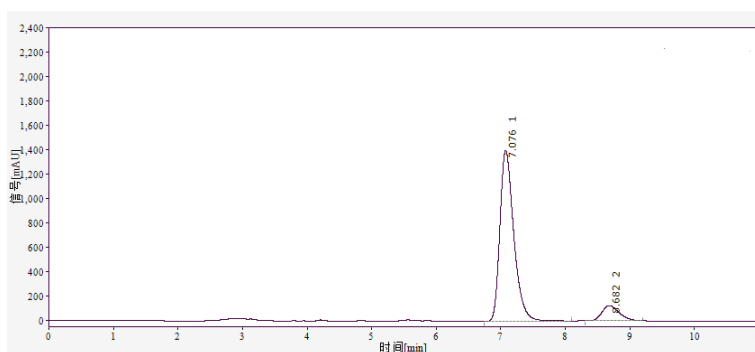

| No | Retention Time | Area      | % Area | Int Type |
|----|----------------|-----------|--------|----------|
| 1  | 7.076          | 20942.787 | 90.1   | BB       |
| 2  | 8.682          | 2297.349  | 9.9    | BB       |

**Methyl (3*S*,5*S*)-5-(((*E*)-1-acetyl-6-bromo-2-oxoindolin-3-ylidene)amino)-2-((*tert*-butoxycarbonyl)amino)-6,6,6-trifluoro-4-phenylhexa-2,3-dienoate**

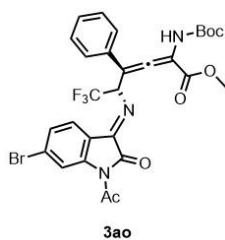

From 28.7 mg (0.1 mmol, 1.0 equiv) of **1a** and 41.8 mg (0.12 mmol, 1.2 equiv) of **2o**, 52.7 mg (83% yield) of compound **3ao** was obtained as a yellow solid,  $[\alpha]_D^{25} = -23$  ( $c = 1.0$ ,  $\text{CHCl}_3$ ), Mp. = 87 - 88 °C. Dr (> 20:1) was determined by HPLC analysis. 80% ee was determined by HPLC analysis (Daicel Chiralpak IC column, 245 nm, hexane/2-propanol 90:10, 1.0 mL/min). Retention time:  $t_{\text{major}} = 7.3$  min,  $t_{\text{minor}} = 8.8$  min.  $^1\text{H NMR}$  (400 MHz,  $\text{CDCl}_3$ )  $\delta$  8.50 (s, 1H), 7.73 (dd,  $J = 16.1, 7.9$  Hz, 3H), 7.52 – 7.36 (m, 3H), 7.33 (t,  $J = 7.3$  Hz, 1H), 6.70 (q,  $J = 6.6$  Hz, 1H), 6.09 (s, 1H), 3.31 (s, 3H), 2.69 (s, 3H), 1.43 (s, 9H).  $^{13}\text{C NMR}$  (101 MHz,  $\text{CDCl}_3$ )  $\delta$  205.2, 170.1, 170.0, 163.8, 157.5, 152.9, 151.3, 143.6, 140.4, 133.7, 128.6, 128.5, 127.9, 126.3, 124.5 (q,  $J_{\text{C-F}} = 281.6$  Hz), 123.8, 120.3, 117.5, 113.9, 105.7, 81.3, 61.7 (q,  $J_{\text{C-F}} = 30.3$  Hz), 52.9, 29.7, 28.1, 26.6.  $^{19}\text{F NMR}$  (376 MHz,  $\text{CDCl}_3$ )  $\delta$  -72.81. IR ( $\text{cm}^{-1}$ )  $\nu$  3423.6, 3128.1-2872.6, 1948.0, 1755.4-1720.2, 1493.7, 1274.8-1129.3, 923.5, 766.1, 606.8. HRMS (ESI)  $m/z$  calcd for  $\text{C}_{28}\text{H}_{25}\text{BrF}_3\text{N}_3\text{NaO}_6$   $[\text{M}+\text{Na}]^+$ : 658.0771, found 658.0759.

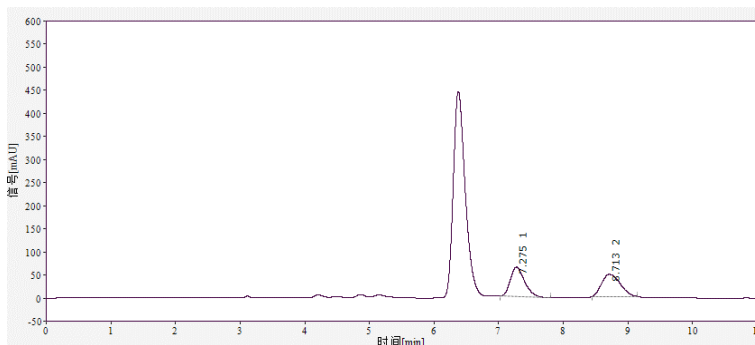

| No | Retention Time | Area    | % Area | Int Type |
|----|----------------|---------|--------|----------|
| 1  | 7.275          | 974.413 | 50.6   | BB       |
| 2  | 8.713          | 950.180 | 49.4   | BB       |

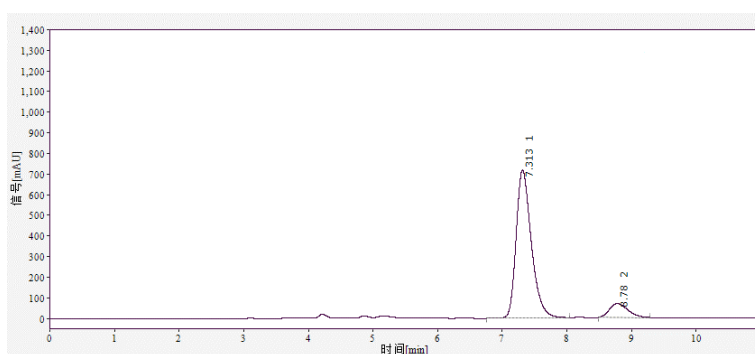

| No | Retention Time | Area      | % Area | Int Type |
|----|----------------|-----------|--------|----------|
| 1  | 7.313          | 11700.736 | 89.8   | BB       |
| 2  | 8.780          | 1335.122  | 10.2   | BB       |

**Methyl (3*S*,5*S*)-5-(((*E*)-1-acetyl-7-fluoro-2-oxoindolin-3-ylidene)amino)-2-((*tert*-butoxycarbonyl)amino)-6,6,6-trifluoro-4-phenylhexa-2,3-dienoate**

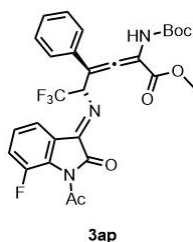

From 28.7 mg (0.1 mmol, 1.0 equiv) of **1a** and 34.6 mg (0.12 mmol, 1.2 equiv) of **2p**, 46.0 mg (80% yield) of compound **3ap** was obtained as a yellow solid,  $[\alpha]_D^{25} = -51$  ( $c = 1.0$ ,  $\text{CHCl}_3$ ), Mp. = 65 - 66 °C. Dr (> 20:1) was determined by HPLC analysis. 66% ee was determined by HPLC analysis (Daicel Chiralpak IC column, 245 nm, hexane/2-propanol 90:10, 0.5 mL/min). Retention time:  $t_{\text{major}} = 17.5$  min,  $t_{\text{minor}} = 20.8$  min.  $^1\text{H NMR}$  (400 MHz,  $\text{CDCl}_3$ )  $\delta$  7.76 (d,  $J = 7.6$  Hz, 2H), 7.66 (d,  $J = 6.7$  Hz, 1H), 7.40 (d,  $J = 7.9$  Hz, 2H), 7.38 – 7.21 (m, 4H), 6.72 (q,  $J = 6.6$  Hz, 1H), 6.09 (s, 1H), 3.30 (s, 3H), 2.71 (s, 3H), 1.44 (s, 9H).  $^{13}\text{C NMR}$  (101 MHz,  $\text{CDCl}_3$ )  $\delta$  205.3, 167.7, 163.8, 157.1, 153.7, 153.7, 151.3, 150.9, 148.4, 133.7, 129.1, 129.0, 128.6, 127.9, 127.4, 127.3, 125.2, 124.4 (q,  $J_{\text{C-F}} = 282.4$  Hz), 122.9, 122.7, 118.9, 118.9, 113.8, 105.8, 81.3, 61.7 (q,  $J_{\text{C-F}} = 28.4$  Hz), 52.9, 29.7, 28.1, 26.1.  $^{19}\text{F NMR}$  (376 MHz,  $\text{CDCl}_3$ )  $\delta$  -72.89, -110.16. IR ( $\text{cm}^{-1}$ )  $\nu$  3424.6, 3058.7-2873.2, 1948.5, 1719.4, 1494.1, 1294.5-1128.7, 1046.9-1020.9, 802.5, 765.6, 698.1. HRMS (ESI)  $m/z$  calcd for  $\text{C}_{28}\text{H}_{25}\text{F}_4\text{N}_3\text{NaO}_6$   $[\text{M}+\text{Na}]^+$ : 598.1572, found 598.1567.

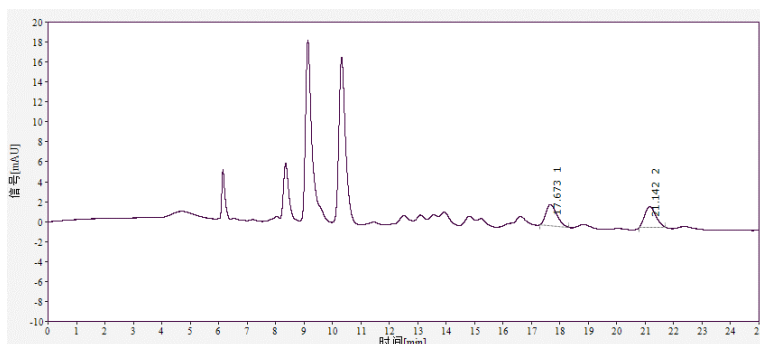

| No | Retention Time | Area   | % Area | Int Type |
|----|----------------|--------|--------|----------|
| 1  | 17.673         | 57.358 | 50.3   | BB       |
| 2  | 21.142         | 56.664 | 49.7   | BB       |

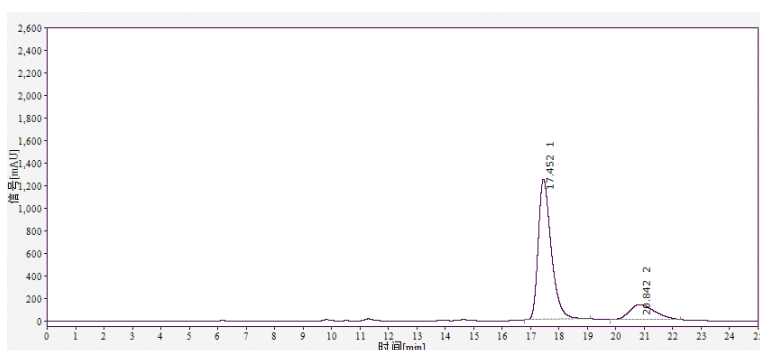

| No | Retention Time | Area      | % Area | Int Type |
|----|----------------|-----------|--------|----------|
| 1  | 17.452         | 39498.113 | 82.9   | BB       |
| 2  | 20.842         | 8156.178  | 17.1   | BB       |

## 8. Gram-scale asymmetric cycloaddition for the synthesis of **3ea** and

### **3ah**

**Methyl (3*S*,5*S*)-2-((*tert*-butoxycarbonyl)amino)-6,6,6-trifluoro-4-(2-fluorophenyl)-5-(((*E*)-2-oxobenzo[*b*]thiophen-3(2*H*)-ylidene)amino)hexa-2,3-dienoate**

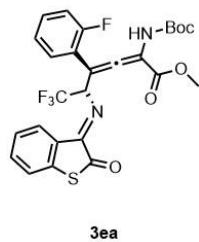

From 0.61 g (2 mmol, 1.0 equiv) of **1e** and 0.59 g (2.4 mmol, 1.2 equiv) of **2a**, 0.66 g (60% yield) of compound **3ea** was obtained as a yellow solid. Dr (> 20:1) was determined by HPLC analysis. 90% ee was determined by HPLC analysis (Daicel Chiralpak IA-3 column, 245 nm, hexane/2-propanol 90:10, 1.0 mL/min). Retention time:  $t_{\text{major}} = 5.3$  min,  $t_{\text{minor}} = 6.9$  min.

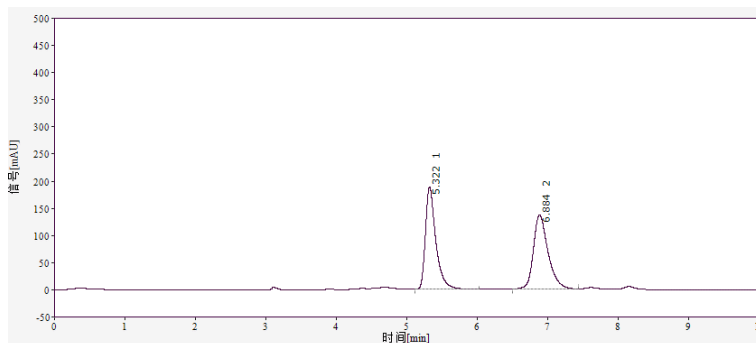

| No | Retention Time | Area     | % Area | Int Type |
|----|----------------|----------|--------|----------|
| 1  | 5.322          | 1932.564 | 49.5   | BB       |
| 2  | 6.884          | 1968.281 | 50.5   | BB       |

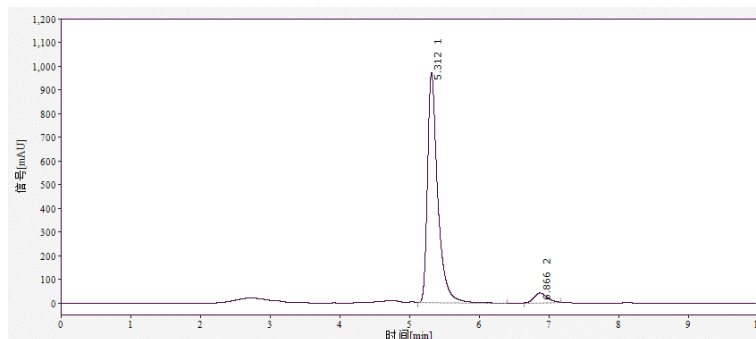

| No | Retention Time | Area     | % Area | Int Type |
|----|----------------|----------|--------|----------|
| 1  | 5.312          | 9863.283 | 94.9   | BB       |
| 2  | 6.866          | 527.449  | 5.1    | BB       |

**Methyl (3*S*,5*S*)-5-(((*E*)-1-acetyl-2-oxoindolin-3-ylidene)amino)-2-((*tert*-butoxycarbonyl)amino)-6,6,6-trifluoro-4-phenylhexa-2,3-dienoate**

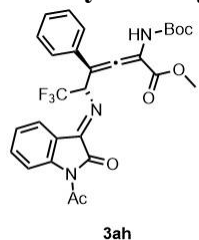

From 0.57 g (2 mmol, 1.0 equiv) of **1a** and 0.65 g (0.12 mmol, 1.2 equiv) of **2h**, 0.78 g (70% yield) of compound **3ah** was obtained as a yellow solid. Dr (> 20:1) was determined by HPLC analysis. 88% ee was determined by HPLC analysis (Daicel Chiralpak IA-3 column, 245 nm, hexane/2-propanol 90:10, 1.0 mL/min). Retention time:  $t_{\text{major}} = 6.2$  min,  $t_{\text{minor}} = 10.4$  min.

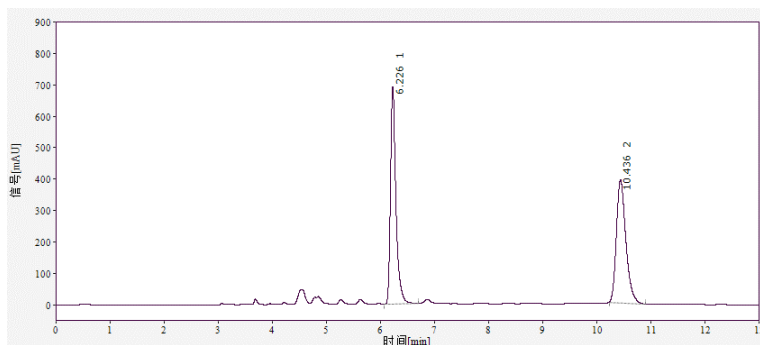

| No | Retention Time | Area     | % Area | Int Type |
|----|----------------|----------|--------|----------|
| 1  | 6.226          | 4878.169 | 50.4   | BB       |
| 2  | 10.436         | 4792.972 | 49.6   | BB       |

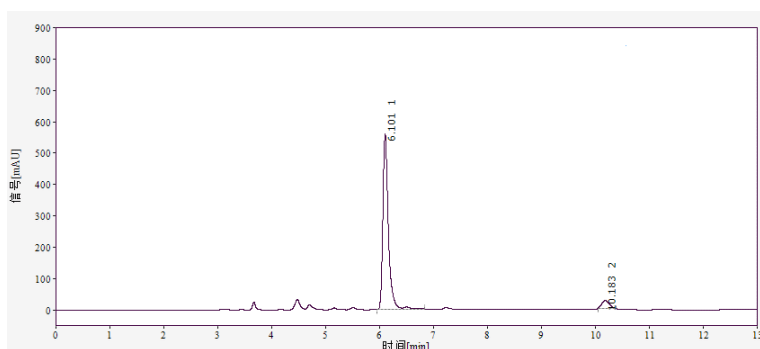

| No | Retention Time | Area     | % Area | Int Type |
|----|----------------|----------|--------|----------|
| 1  | 6.101          | 3968.968 | 94.2   | BB       |
| 2  | 10.183         | 243.820  | 5.8    | BB       |

## 9. Synthetic transformation of 3ea

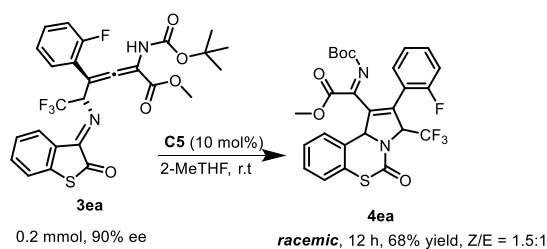

### Methyl (Z)-2-((tert-butoxycarbonyl)imino)-2-(2-(2-fluorophenyl)-5-oxo-3-(trifluoromethyl)-3,10b-dihydro-5H-benzo[e]pyrrolo[1,2-c][1,3]thiazin-1-yl)acetate

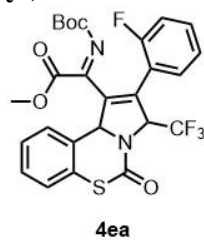

From 30.5 mg (0.1 mmol, 1.0 equiv) of **1e** and 29.4 mg (0.12 mmol, 1.2 equiv) of **2a**, 44.6 mg (81% yield) of compound **4ea** was obtained as a white solid, Mp. = 188 - 189 °C. <sup>1</sup>H NMR (400 MHz, CDCl<sub>3</sub>) δ 8.04 (dd, *J* = 6.4, 3.0 Hz, 1H), 7.50 – 7.41 (m, 5H), 7.15 (t, *J* = 9.0 Hz, 2H), 5.83 (d, *J* = 9.0 Hz, 1H), 5.41 (dd, *J* = 9.0, 5.5 Hz, 1H), 3.41 (s, 3H), 1.47 (s, 9H). <sup>13</sup>C NMR (101 MHz, CDCl<sub>3</sub>) δ 169.7, 161.2, 159.6, 158.8, 155.1, 134.0, 132.2, 131.4, 129.1, 127.6, 125.2, 124.8 (q, *J*<sub>C-F</sub> = 348.0 Hz), 124.1, 121.5, 120.2, 119.1, 115.8, 80.6, 53.0, 52.7, 28.2, 25.9. <sup>19</sup>F NMR (376 MHz,

CDCl<sub>3</sub>)  $\delta$  -52.97, -112.42. IR (cm<sup>-1</sup>)  $\nu$  3439.5, 3140.52.8-2931.8, 1727.6-1710.4, 1489.3, 1368.0-1222.3, 1168.5-1143.7, 934.7, 761.9. HRMS (ESI)  $m/z$  calcd for C<sub>26</sub>H<sub>23</sub>F<sub>3</sub>N<sub>2</sub>NaO<sub>5</sub>S [M+Na]<sup>+</sup>: 467.0848, found 467.084

## 10 One-pot synthesis of derivatized products 4

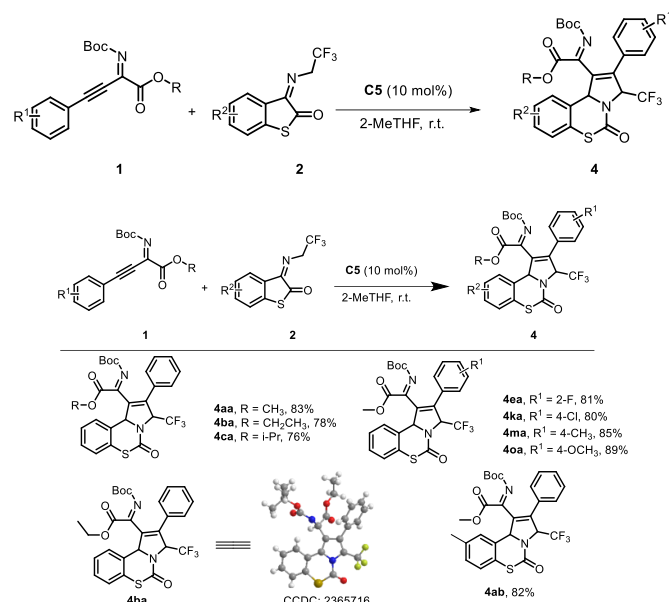

Scheme S3 The scope of derivatized products and the single crystal structure of 4ba.

### Methyl (*Z*)-2-((*tert*-butoxycarbonyl)imino)-2-(5-oxo-2-phenyl-3-(trifluoromethyl)-3,10b-dihydro-5*H*-benzo[*e*]pyrrolo[1,2-*c*][1,3]thiazin-1-yl)acetate

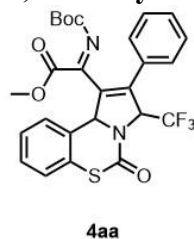

From 28.7 mg (0.1 mmol, 1.0 equiv) of **1a** and 29.4 mg (0.12 mmol, 1.2 equiv) of **2a**, 44.2 mg (83% yield) of compound **4aa** was obtained as a white solid, Mp. = 164 - 165 °C. <sup>1</sup>H NMR (400 MHz, CDCl<sub>3</sub>)  $\delta$  8.14 (d,  $J$  = 7.2 Hz, 1H), 7.4 (ddd,  $J$  = 16.3, 7.0, 3.7 Hz, 5H), 7.33 (d,  $J$  = 7.0 Hz, 1H), 7.17 - 7.10 (m, 1H), 5.91 (d,  $J$  = 8.8 Hz, 1H), 4.99 (d,  $J$  = 8.9 Hz, 1H), 3.59 (s, 3H), 1.41 (s, 9H), 0.98 (s, 1H). <sup>13</sup>C NMR (101 MHz, CDCl<sub>3</sub>)  $\delta$  170.2, 159.7, 154.8, 135.1, 135.1, 133.4, 131.5, 129.5, 129.0, 129.0, 128.5, 128.3, 127.9, 127.7, 127.5, 126.5, 125.2, 123.0, 121.7, 121.2, 120.6 (q,  $J_{C-F}$  = 270.5 Hz), 118.3, 118.0, 108.2, 80.6, 52.9, 50.6, 45.5, 34.4, 28.2, 25.9. <sup>19</sup>F NMR (376 MHz, CDCl<sub>3</sub>)  $\delta$  -52.14. IR (cm<sup>-1</sup>)  $\nu$  3440.7, 3140.5-2932.0, 1724.5-1711.7, 1489.2, 1313.2-1168.5, 1172.1-1135.3, 935.7. HRMS (ESI)  $m/z$  calcd for C<sub>26</sub>H<sub>23</sub>F<sub>3</sub>N<sub>2</sub>NaO<sub>5</sub>S [M+Na]<sup>+</sup>: 555.1172, found 555.1191.

### Ethyl (*Z*)-2-((*tert*-butoxycarbonyl)imino)-2-(5-oxo-2-phenyl-3-(trifluoromethyl)-3,10b-dihydro-5*H*-benzo[*e*]pyrrolo[1,2-*c*][1,3]thiazin-1-yl)acetate

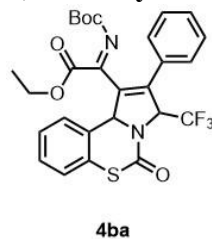

From 30.1 mg (0.1 mmol, 1.0 equiv) of **1b** and 29.4 mg (0.12 mmol, 1.2 equiv) of **2a**, 42.6 mg (78% yield) of compound **4ba** was obtained as a white solid, Mp. = 159 - 160 °C. <sup>1</sup>H NMR (400 MHz, CDCl<sub>3</sub>)  $\delta$  8.21 - 8.11 (m, 1H), 7.52 - 7.38 (m, 5H), 7.34 (d,  $J$  = 6.2 Hz, 1H), 7.16 (d,  $J$  = 7.4 Hz, 1H), 5.87 (d,  $J$  = 8.6 Hz, 1H), 4.96 (d,  $J$  = 8.7 Hz, 1H), 4.06 (p,  $J$  = 6.9 Hz, 2H), 1.39 (s, 9H), 1.17 (t,  $J$  =

7.1 Hz, 5H).  $^{13}\text{C}$  NMR (101 MHz,  $\text{CDCl}_3$ )  $\delta$  169.8, 159.7, 154.7, 135.2, 133.3, 131.6, 129.7, 129.5, 129.0, 128.9, 128.4, 128.3, 127.8, 127.5, 125.2, 121.8, 121.4, 120.6 (q,  $J_{\text{C-F}} = 271.1$  Hz), 118.3, 117.9, 80.4, 62.4, 50.7, 28.2, 14.0.  $^{19}\text{F}$  NMR (376 MHz,  $\text{CDCl}_3$ )  $\delta$  -52.11. IR ( $\text{cm}^{-1}$ )  $\nu$  3431.2, 3078.2-2931.5, 1714.4, 1487.9, 1174.3-1133.3. HRMS (ESI)  $m/z$  calcd for  $\text{C}_{27}\text{H}_{25}\text{F}_3\text{N}_2\text{NaO}_5\text{S}$   $[\text{M}+\text{Na}]^+$ : 569.1328, found 569.1312.

**Isopropyl (Z)-2-((tert-butoxycarbonyl)imino)-2-(5-oxo-2-phenyl-3-(trifluoromethyl)-3,10b-dihydro-5H-benzo[e]pyrrolo[1,2-c][1,3]thiazin-1-yl)acetate**

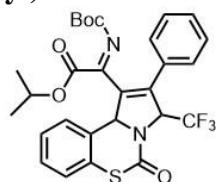

4ca

From 31.5 mg (0.1 mmol, 1.0 equiv) of **1c** and 45.4 mg (0.12 mmol, 1.2 equiv) of **2a**, 42.6 mg (76% yield) of compound **4ca** was obtained as a white solid, Mp. = 200 - 201 °C.  $^1\text{H}$  NMR (400 MHz,  $\text{CDCl}_3$ )  $\delta$  8.22 – 8.08 (m, 1H), 7.60 – 7.38 (m, 5H), 7.38 – 7.31 (m, 1H), 7.20 (d,  $J = 7.5$  Hz, 1H), 5.82 (d,  $J = 8.4$  Hz, 1H), 4.94 (dq,  $J = 12.4, 6.1$  Hz, 2H), 1.37 (s, 9H), 1.18 (t,  $J = 5.6$  Hz, 7H).  $^{13}\text{C}$  NMR (101 MHz,  $\text{CDCl}_3$ )  $\delta$  169.5, 159.7, 154.6, 135.3, 133.2, 131.7, 129.8, 128.9, 128.8, 128.6 (q,  $J_{\text{C-F}} = 167.3$  Hz), 128.3, 127.5, 125.2, 121.8, 121.6, 119.3, 118.2, 117.8, 80.3, 70.6, 50.9, 28.2, 25.9, 21.6, 21.6.  $^{19}\text{F}$  NMR (376 MHz,  $\text{CDCl}_3$ )  $\delta$  -52.07. IR ( $\text{cm}^{-1}$ )  $\nu$  3371.3, 3307.4, 3006.2-2930.5, 1755.1-1694.2, 1153.0, 928.9. HRMS (ESI)  $m/z$  calcd for  $\text{C}_{28}\text{H}_{27}\text{F}_3\text{N}_2\text{NaO}_5\text{S}$   $[\text{M}+\text{Na}]^+$ : 583.1485, found 583.1492.

**Methyl (Z)-2-((tert-butoxycarbonyl)imino)-2-(2-(4-chlorophenyl)-5-oxo-3-(trifluoromethyl)-3,10b-dihydro-5H-benzo[e]pyrrolo[1,2-c][1,3]thiazin-1-yl)acetate**

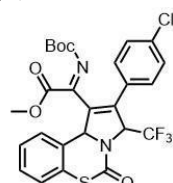

4ka

From 32.1 mg (0.1 mmol, 1.0 equiv) of **1k** and 29.4 mg (0.12 mmol, 1.2 equiv) of **2a**, 45.3 mg (80% yield) of compound **4ka** was obtained as a white solid, Mp. = 143 - 144 °C.  $^1\text{H}$  NMR (400 MHz,  $\text{CDCl}_3$ )  $\delta$  8.03 (s, 1H), 7.51 – 7.29 (m, 5H), 7.20 (d,  $J = 8.6$  Hz, 2H), 7.02 (d,  $J = 8.2$  Hz, 1H), 5.85 – 5.70 (m, 1H), 4.95 (d,  $J = 8.2$  Hz, 1H), 3.54 (s, 3H), 1.33 (s, 9H).  $^{13}\text{C}$  NMR (101 MHz,  $\text{CDCl}_3$ )  $\delta$  170.2, 159.6, 154.6, 135.2, 134.0, 133.4, 131.0, 130.9, 130.0, 129.1, 128.8, 128.6, 127.9, 127.7, 127.5, 125.3, 121.6, 120.9, 120.5 (q,  $J_{\text{C-F}} = 271.1$  Hz), 118.5, 118.1, 80.7, 53.1, 50.6, 28.2, 25.9.  $^{19}\text{F}$  NMR (376 MHz,  $\text{CDCl}_3$ )  $\delta$  -52.04. IR ( $\text{cm}^{-1}$ )  $\nu$  3436.2, 3138.0-2933.4, 1712.4, 1486.8, 1175.2-1133.6, 934.7. HRMS (ESI)  $m/z$  calcd for  $\text{C}_{26}\text{H}_{22}\text{ClF}_3\text{N}_2\text{NaO}_5\text{S}$   $[\text{M}+\text{Na}]^+$ : 589.0782, found 589.0775.

**Methyl (Z)-2-((tert-butoxycarbonyl)imino)-2-(5-oxo-2-(p-tolyl)-3-(trifluoromethyl)-3,10b-dihydro-5H-benzo[e]pyrrolo[1,2-c][1,3]thiazin-1-yl)acetate**

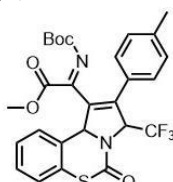

4ma

From 30.1 mg (0.1 mmol, 1.0 equiv) of **1m** and 29.4 mg (0.12 mmol, 1.2 equiv) of **2a**, 46.4 mg (85% yield) of compound **4ma** was obtained as a white solid, Mp. = 178 - 179 °C.  $^1\text{H}$  NMR (400 MHz,  $\text{CDCl}_3$ )  $\delta$  8.06 (d,  $J = 7.2$  Hz, 1H), 7.41 – 7.29 (m, 3H), 7.25 – 7.10 (m, 4H), 6.93 (d,  $J = 5.7$  Hz, 1H), 5.84 (d,  $J = 8.8$  Hz, 1H), 4.93 (d,  $J = 8.8$  Hz, 1H), 3.52 (s, 3H), 2.35 (s, 3H), 1.34 (s, 9H).  $^{13}\text{C}$  NMR (101 MHz,  $\text{CDCl}_3$ )  $\delta$  170.2, 159.7, 154.8, 138.9, 135.2, 133.3, 129.3, 129.1, 129.0, 128.4, 127.9, 127.7, 127.5, 125.2, 121.7, 121.4, 120.6 (q,  $J_{\text{C-F}} = 271.0$  Hz), 118.4, 118.0, 80.5, 52.9, 50.6, 29.7,



28.2, 21.4.  $^{19}\text{F}$  NMR (376 MHz,  $\text{CDCl}_3$ )  $\delta$  -52.21. IR ( $\text{cm}^{-1}$ )  $\nu$  3314.8, 3066.1-2873.2, 1759.8-1696.1, 1176.1-1131.4, 928.8. HRMS (ESI)  $m/z$  calcd for  $\text{C}_{27}\text{H}_{25}\text{F}_3\text{N}_2\text{NaO}_5\text{S}$   $[\text{M}+\text{Na}]^+$ : 569.1328, found 569.1340.

**Methyl (Z)-2-((tert-butoxycarbonyl)imino)-2-(2-(4-methoxyphenyl)-5-oxo-3-(trifluoromethyl)-3,10b-dihydro-5H-benzo[e]pyrrolo[1,2-c][1,3]thiazin-1-yl)acetate**

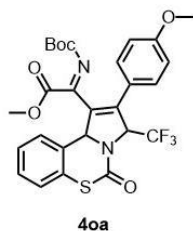

From 31.7 mg (0.1 mmol, 1.0 equiv) of **1o** and 29.4 mg (0.12 mmol, 1.2 equiv) of **2a**, 50.0 mg (89% yield) of compound **4oa** was obtained as a white solid, Mp. = 197 - 198 °C.  $^1\text{H}$  NMR (400 MHz,  $\text{CDCl}_3$ )  $\delta$  8.13 - 7.97 (m, 1H), 7.51 - 7.11 (m, 5H), 7.07 - 6.81 (m, 3H), 5.83 (d,  $J$  = 8.7 Hz, 1H), 4.95 (d,  $J$  = 8.8 Hz, 1H), 3.79 (s, 3H), 3.53 (s, 3H), 1.34 (s, 9H).  $^{13}\text{C}$  NMR (101 MHz,  $\text{CDCl}_3$ )  $\delta$  170.3, 160.0, 159.7, 154.8, 135.1, 133.3, 130.7, 129.0, 127.9, 127.7, 127.5, 125.2, 123.4, 121.7, 121.5, 120.6 (q,  $J_{\text{C-F}}$  = 270.9 Hz), 118.5, 118.1, 114.0, 113.9, 80.5, 55.3, 53.0, 50.6, 29.7, 28.2.  $^{19}\text{F}$  NMR (376 MHz,  $\text{CDCl}_3$ )  $\delta$  -52.27. IR ( $\text{cm}^{-1}$ )  $\nu$  3317.1, 3068.4-2842.0, 1757.2-1696.0, 1251.0, 1178.6-1153.7, 927.8. HRMS (ESI)  $m/z$  calcd for  $\text{C}_{27}\text{H}_{25}\text{F}_3\text{N}_2\text{NaO}_6\text{S}$   $[\text{M}+\text{Na}]^+$ : 585.1278, found 585.1266.

**Methyl (Z)-2-((tert-butoxycarbonyl)imino)-2-(9-methyl-5-oxo-2-phenyl-3-(trifluoromethyl)-3,10b-dihydro-5H-benzo[e]pyrrolo[1,2-c][1,3]thiazin-1-yl)acetate**

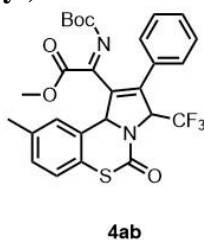

From 28.7 mg (0.1 mmol, 1.0 equiv) of **1a** and 34.1 mg (0.12 mmol, 1.2 equiv) of **2b**, 44.8 mg (82% yield) of compound **4ab** was obtained as a white solid, Mp. = 179 - 180 °C.  $^1\text{H}$  NMR (400 MHz,  $\text{CDCl}_3$ )  $\delta$  8.02 (d,  $J$  = 8.3 Hz, 1H), 7.66 - 7.37 (m, 3H), 7.33 (d,  $J$  = 7.0 Hz, 1H), 7.29 - 7.18 (m, 3H), 7.13 (d,  $J$  = 5.3 Hz, 1H), 5.89 (d,  $J$  = 8.8 Hz, 1H), 4.98 (d,  $J$  = 8.8 Hz, 1H), 3.58 (s, 3H), 2.41 (s, 3H), 1.41 (s, 9H).  $^{13}\text{C}$  NMR (101 MHz,  $\text{CDCl}_3$ )  $\delta$  170.3, 159.9, 154.8, 139.7, 135.1, 133.6, 131.6, 129.5, 129.0, 128.9, 128.5, 128.3, 127.7, 127.3, 126.5, 125.3, 123.0, 120.7 (q,  $J_{\text{C-F}}$  = 270.5 Hz), 120.4, 119.0, 117.9, 117.6, 108.2, 80.5, 52.9, 50.6, 45.5, 34.4, 28.2, 25.9, 21.1.  $^{19}\text{F}$  NMR (376 MHz,  $\text{CDCl}_3$ )  $\delta$  -52.08. IR ( $\text{cm}^{-1}$ )  $\nu$  3395.5, 3031.1-2871.3, 1717.4-1694.1, 1267.9-1249.0, 1153.3-1131.1, 934.5, 772.2, 699.9. HRMS (ESI)  $m/z$  calcd for  $\text{C}_{27}\text{H}_{25}\text{F}_3\text{N}_2\text{NaO}_5\text{S}$   $[\text{M}+\text{Na}]^+$ : 569.1328, found 569.1321.

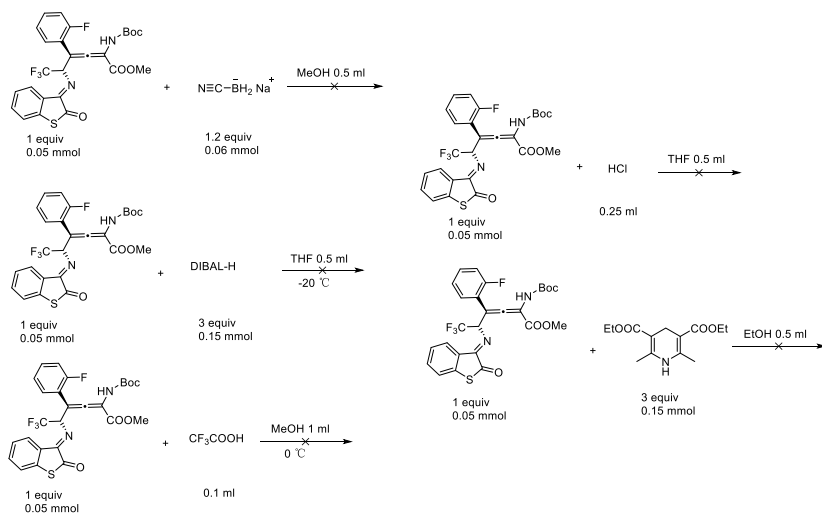

**Scheme S4** Failed derivatization of **3ea**

## 11. X-ray Structures of Compounds **3ba** and **4ba**

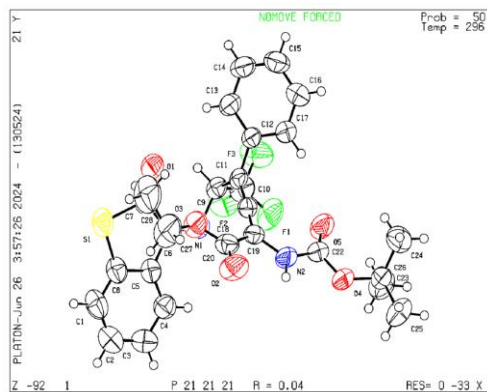

**3ba**  
CCDC: 2365716

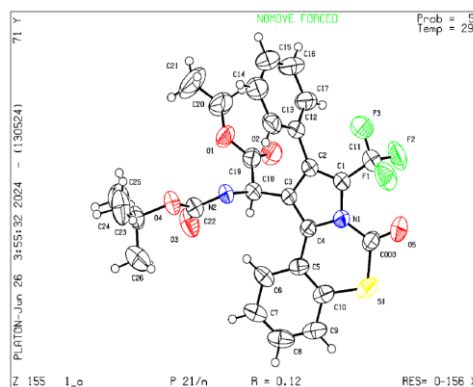

**4ba**  
CCDC: 2365716

## 12. Copies of <sup>1</sup>H, <sup>19</sup>F, <sup>13</sup>C NMR and IR Spectra

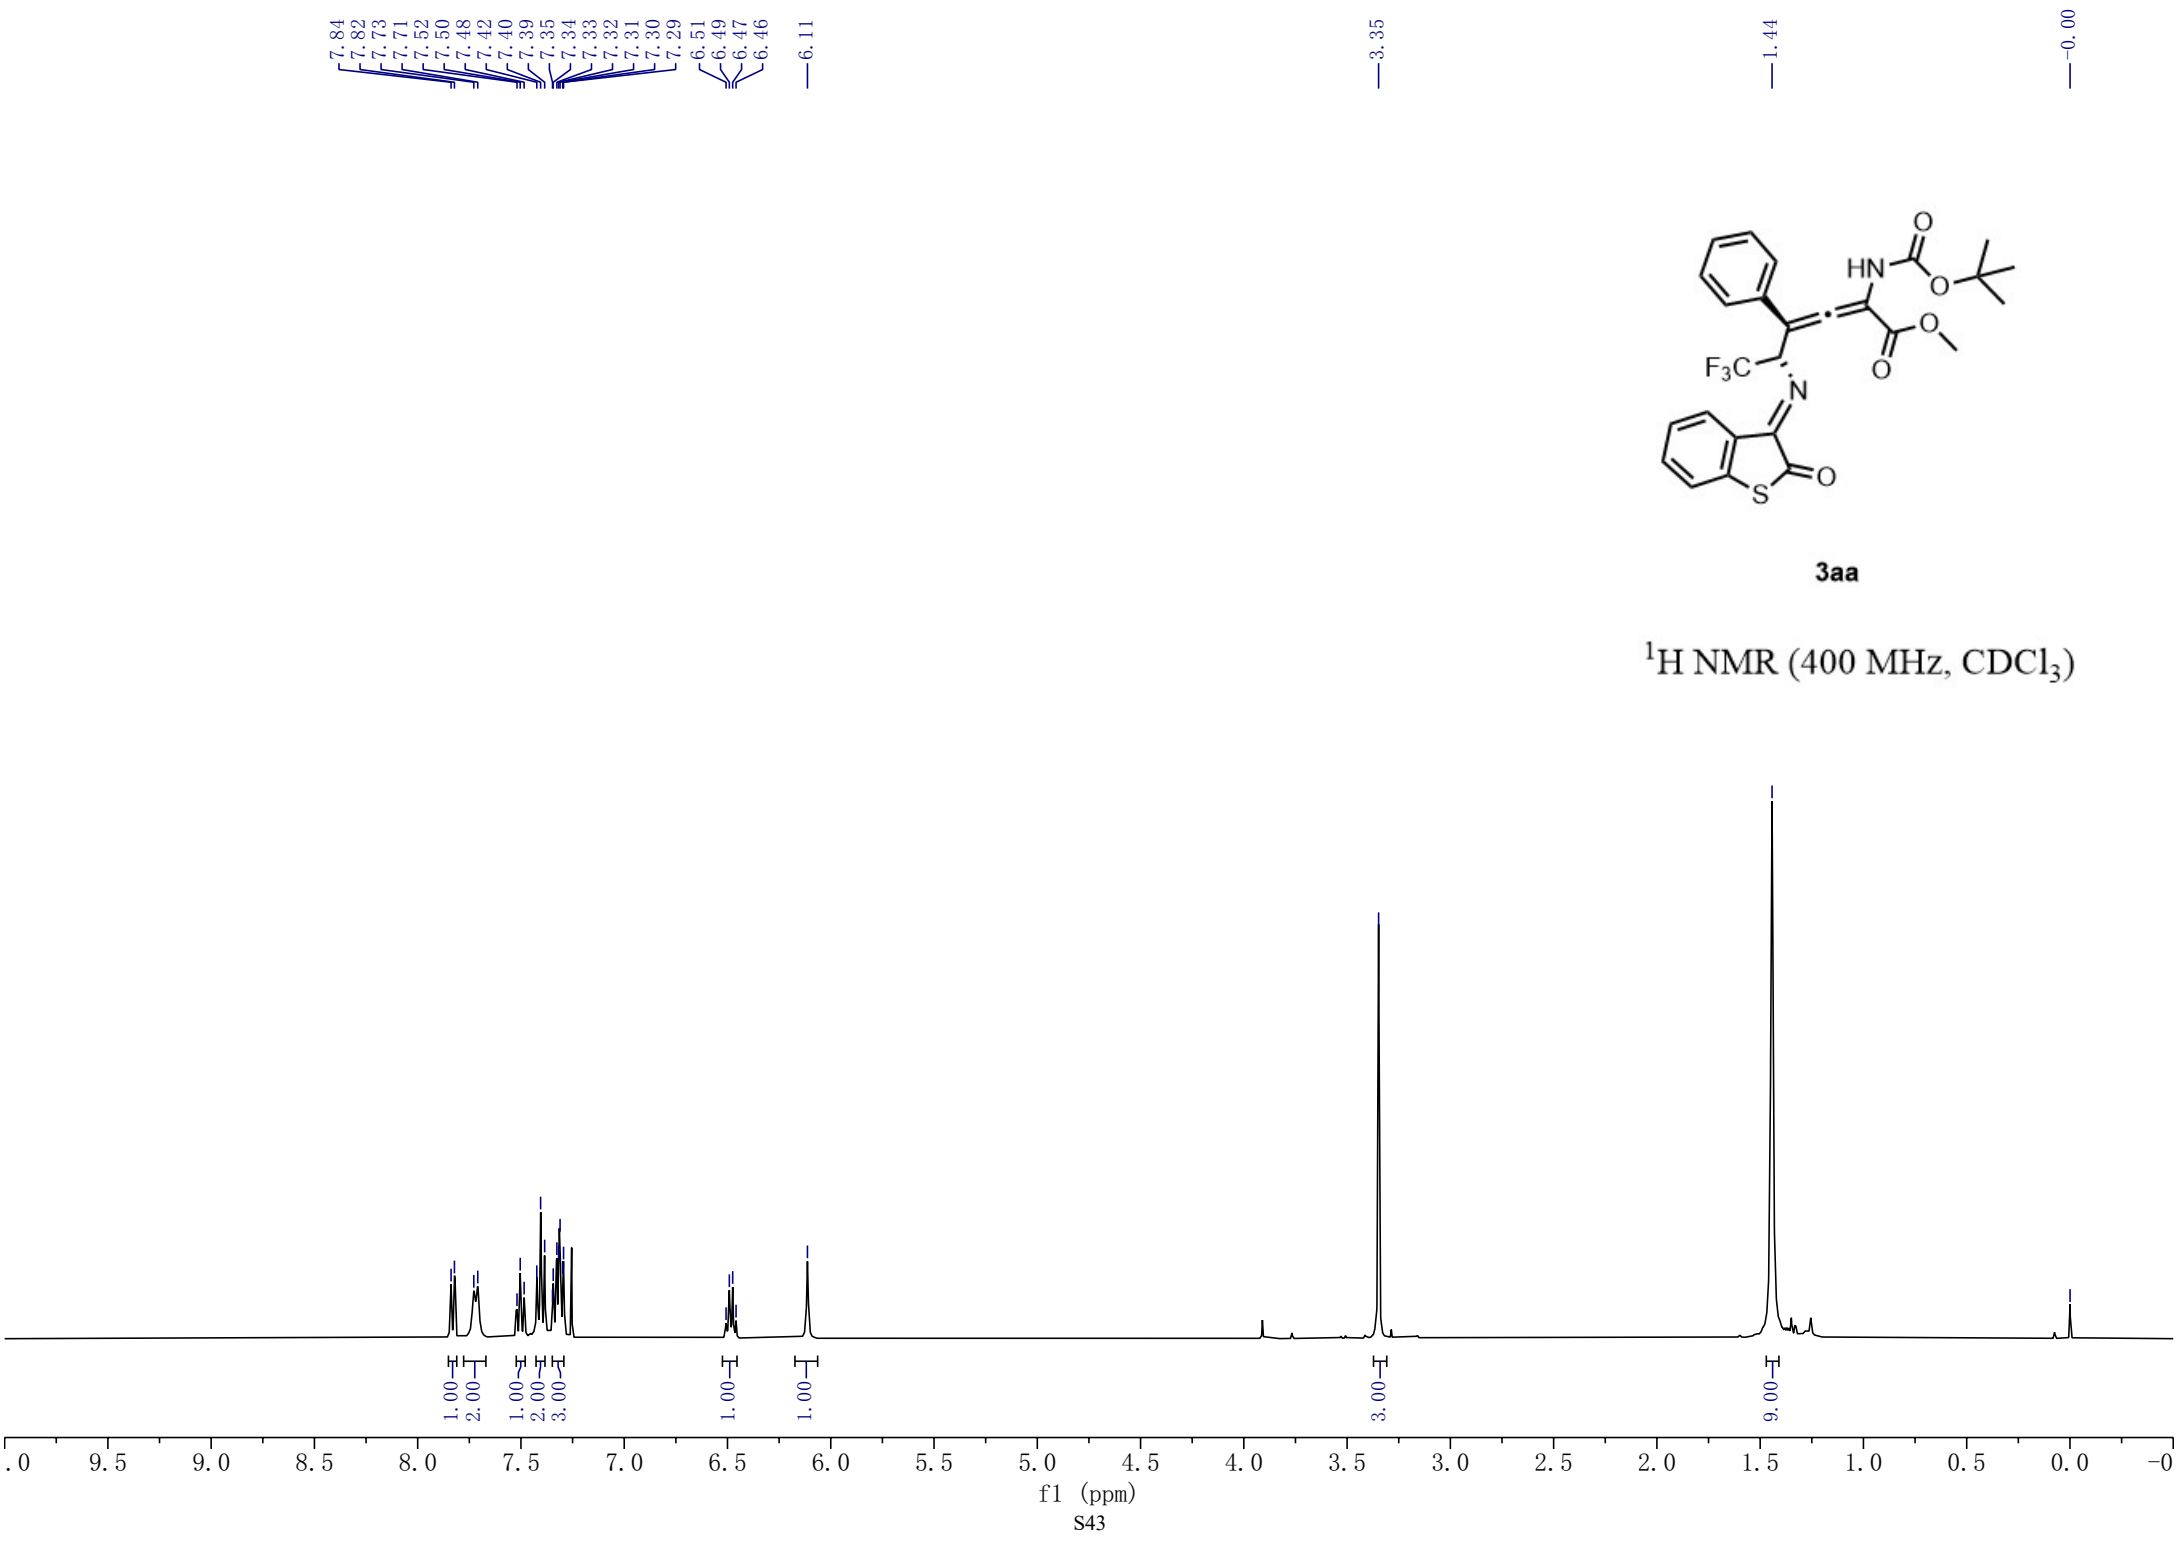

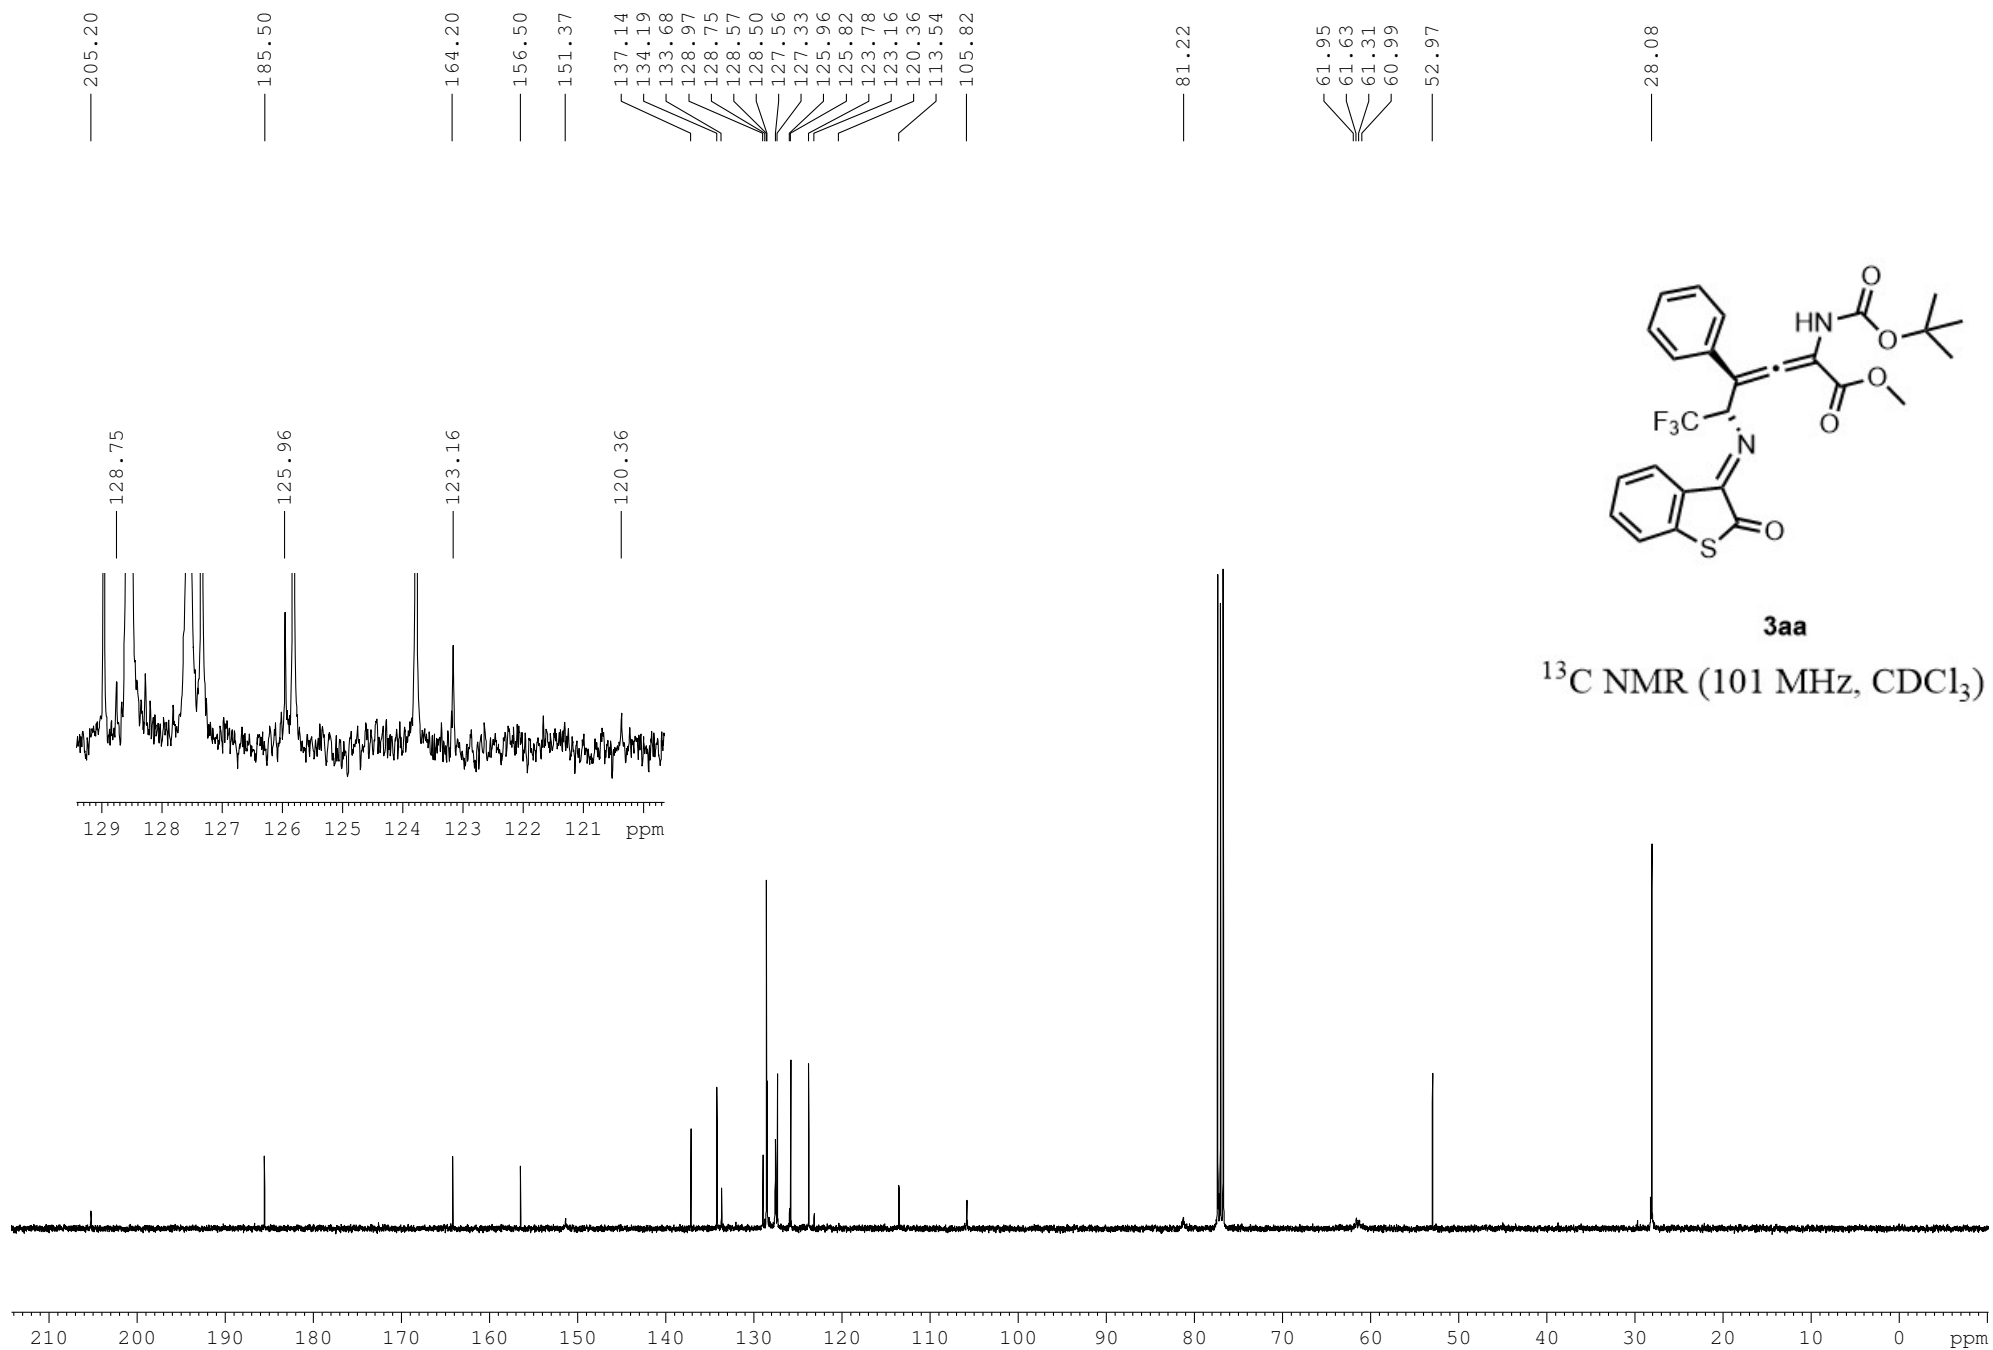



7.84  
7.82  
7.70  
7.68  
7.52  
7.50  
7.48  
7.41  
7.39  
7.37  
7.33  
7.32  
7.31  
7.29  
6.57  
6.56  
6.54  
6.52  
6.13

4.03  
4.01  
4.00  
3.99  
3.98  
3.97  
3.95  
3.82  
3.80  
3.79  
3.78  
3.77  
3.76  
3.74

1.43  
0.95  
0.93  
0.91  
-0.00

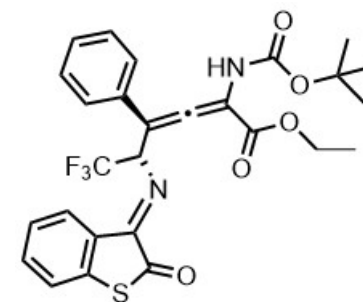

**3ba**

<sup>1</sup>H NMR (400 MHz, CDCl<sub>3</sub>)

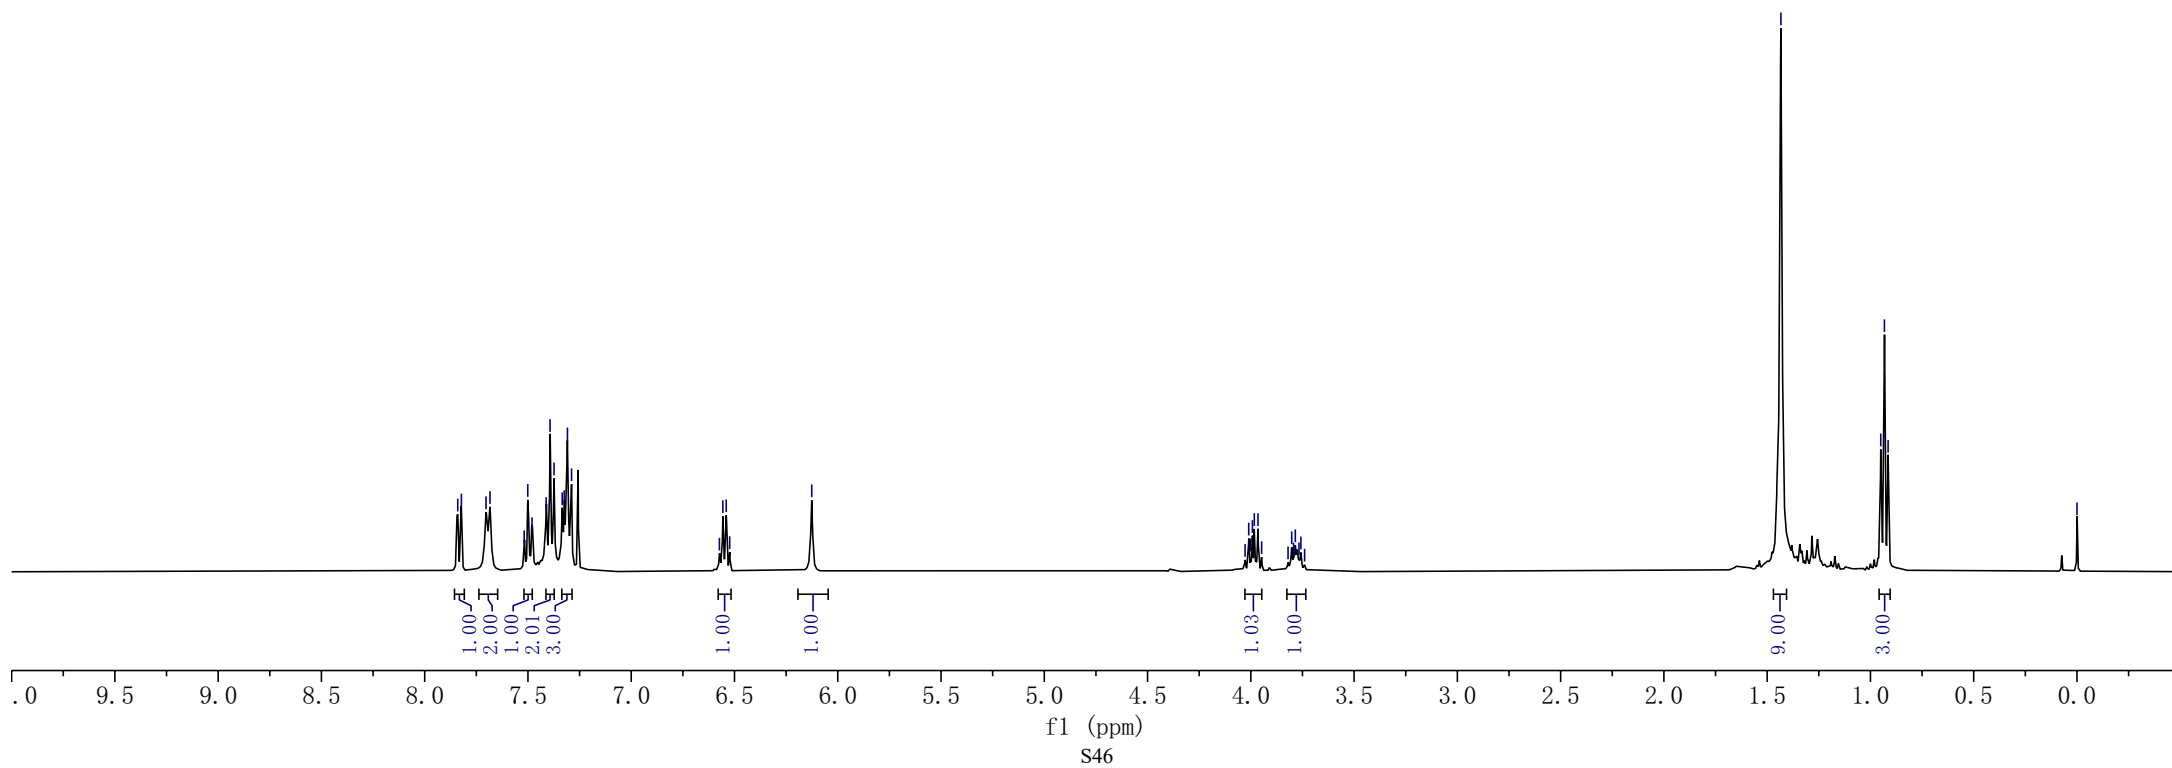

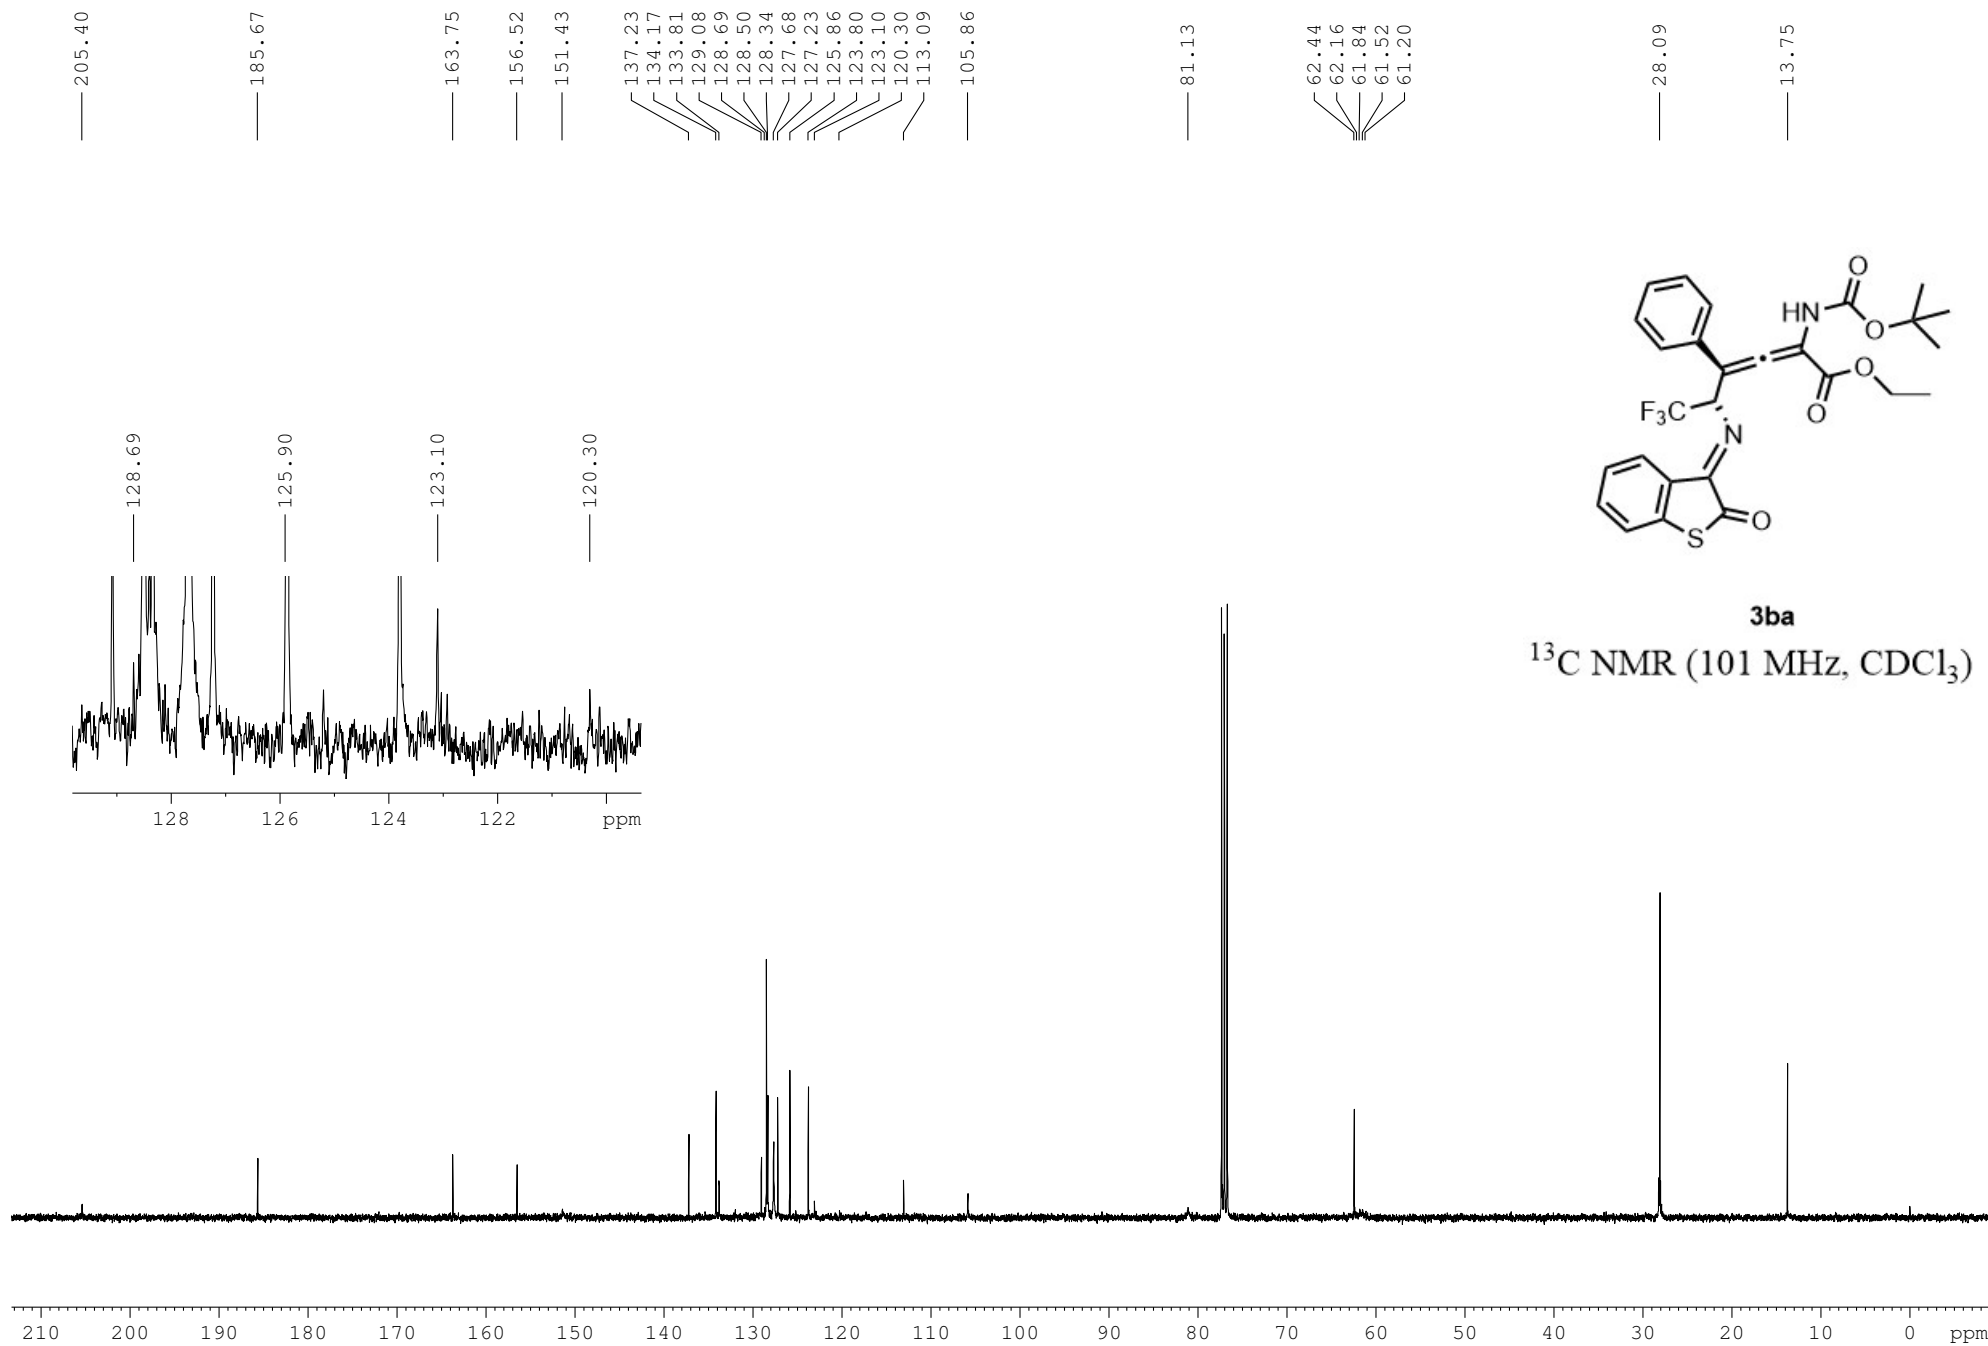

-73.08

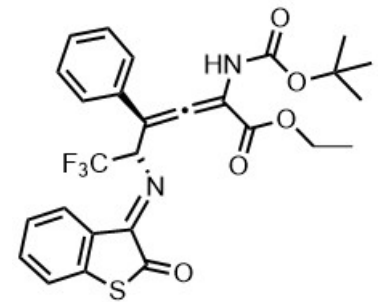

3ba

<sup>19</sup>F NMR (376 MHz, CDCl<sub>3</sub>)

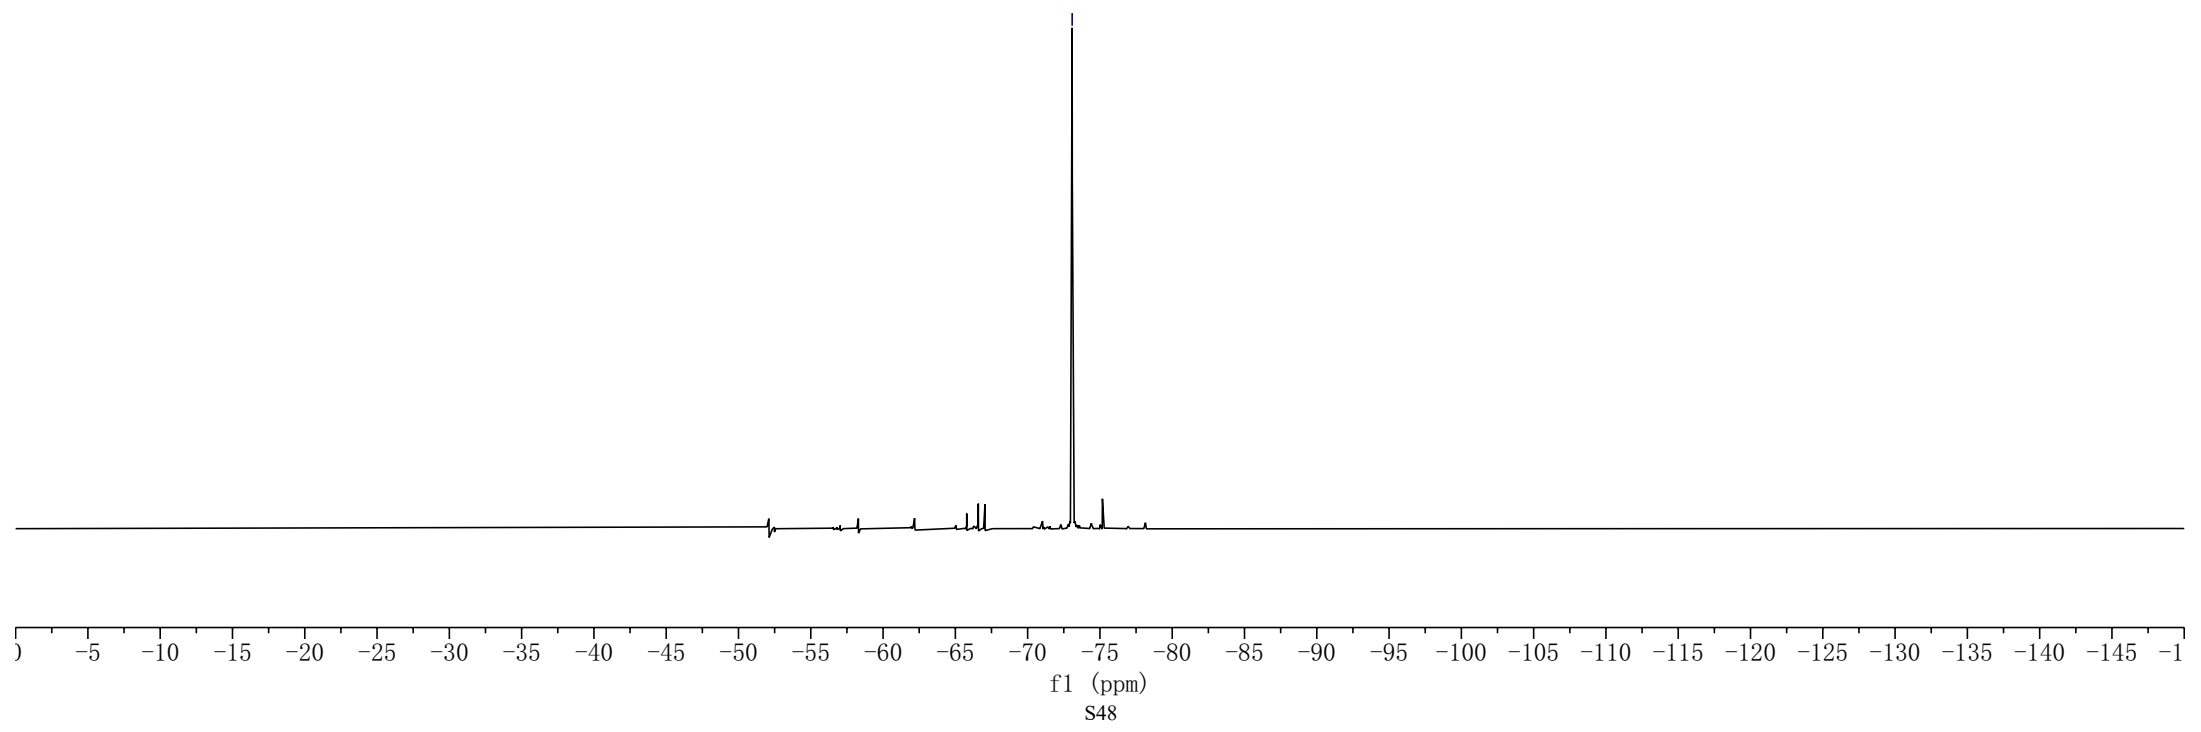



7.75  
7.74  
7.73  
7.72  
7.56  
7.54  
7.43  
7.42  
7.41  
7.40  
7.39  
7.38  
7.23  
7.22  
7.21  
7.20  
7.19  
7.16  
7.14  
6.42  
6.41  
6.39  
6.37  
— 6.03

— 3.24

2.61  
2.59  
2.57  
2.55

1.36  
1.18  
1.16  
1.14

— 0.00

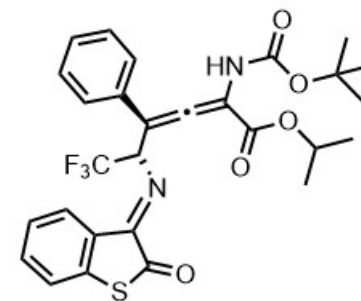

**3ca**

<sup>1</sup>H NMR (400 MHz, CDCl<sub>3</sub>)

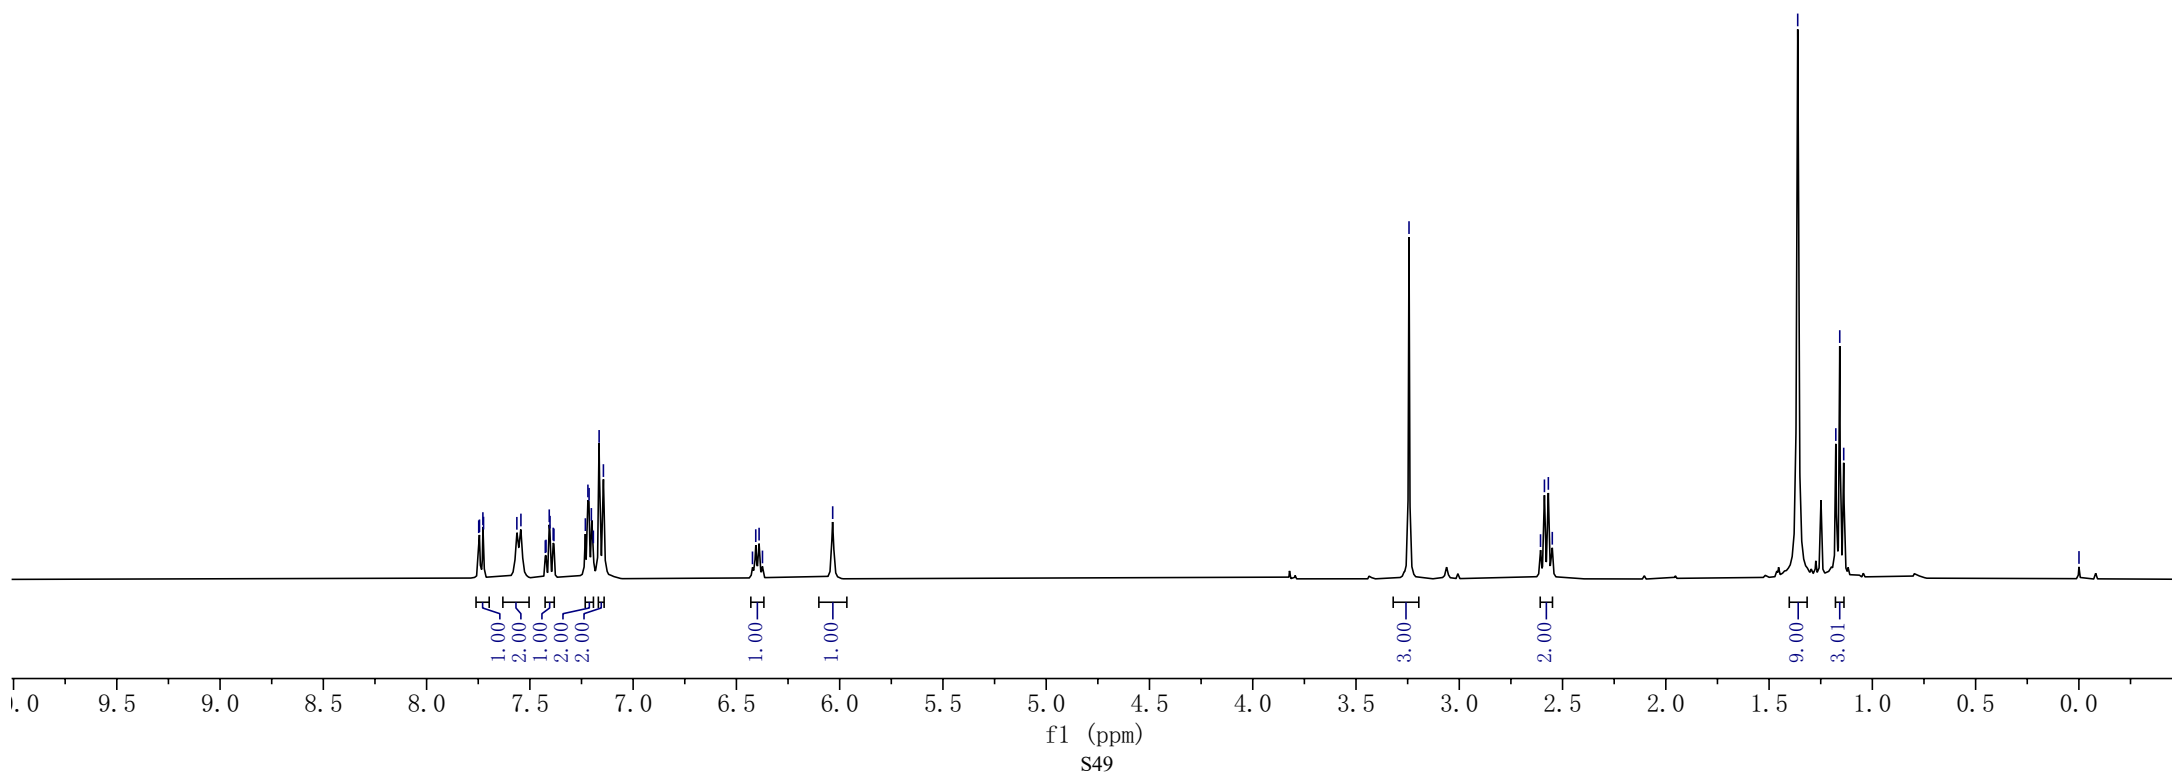

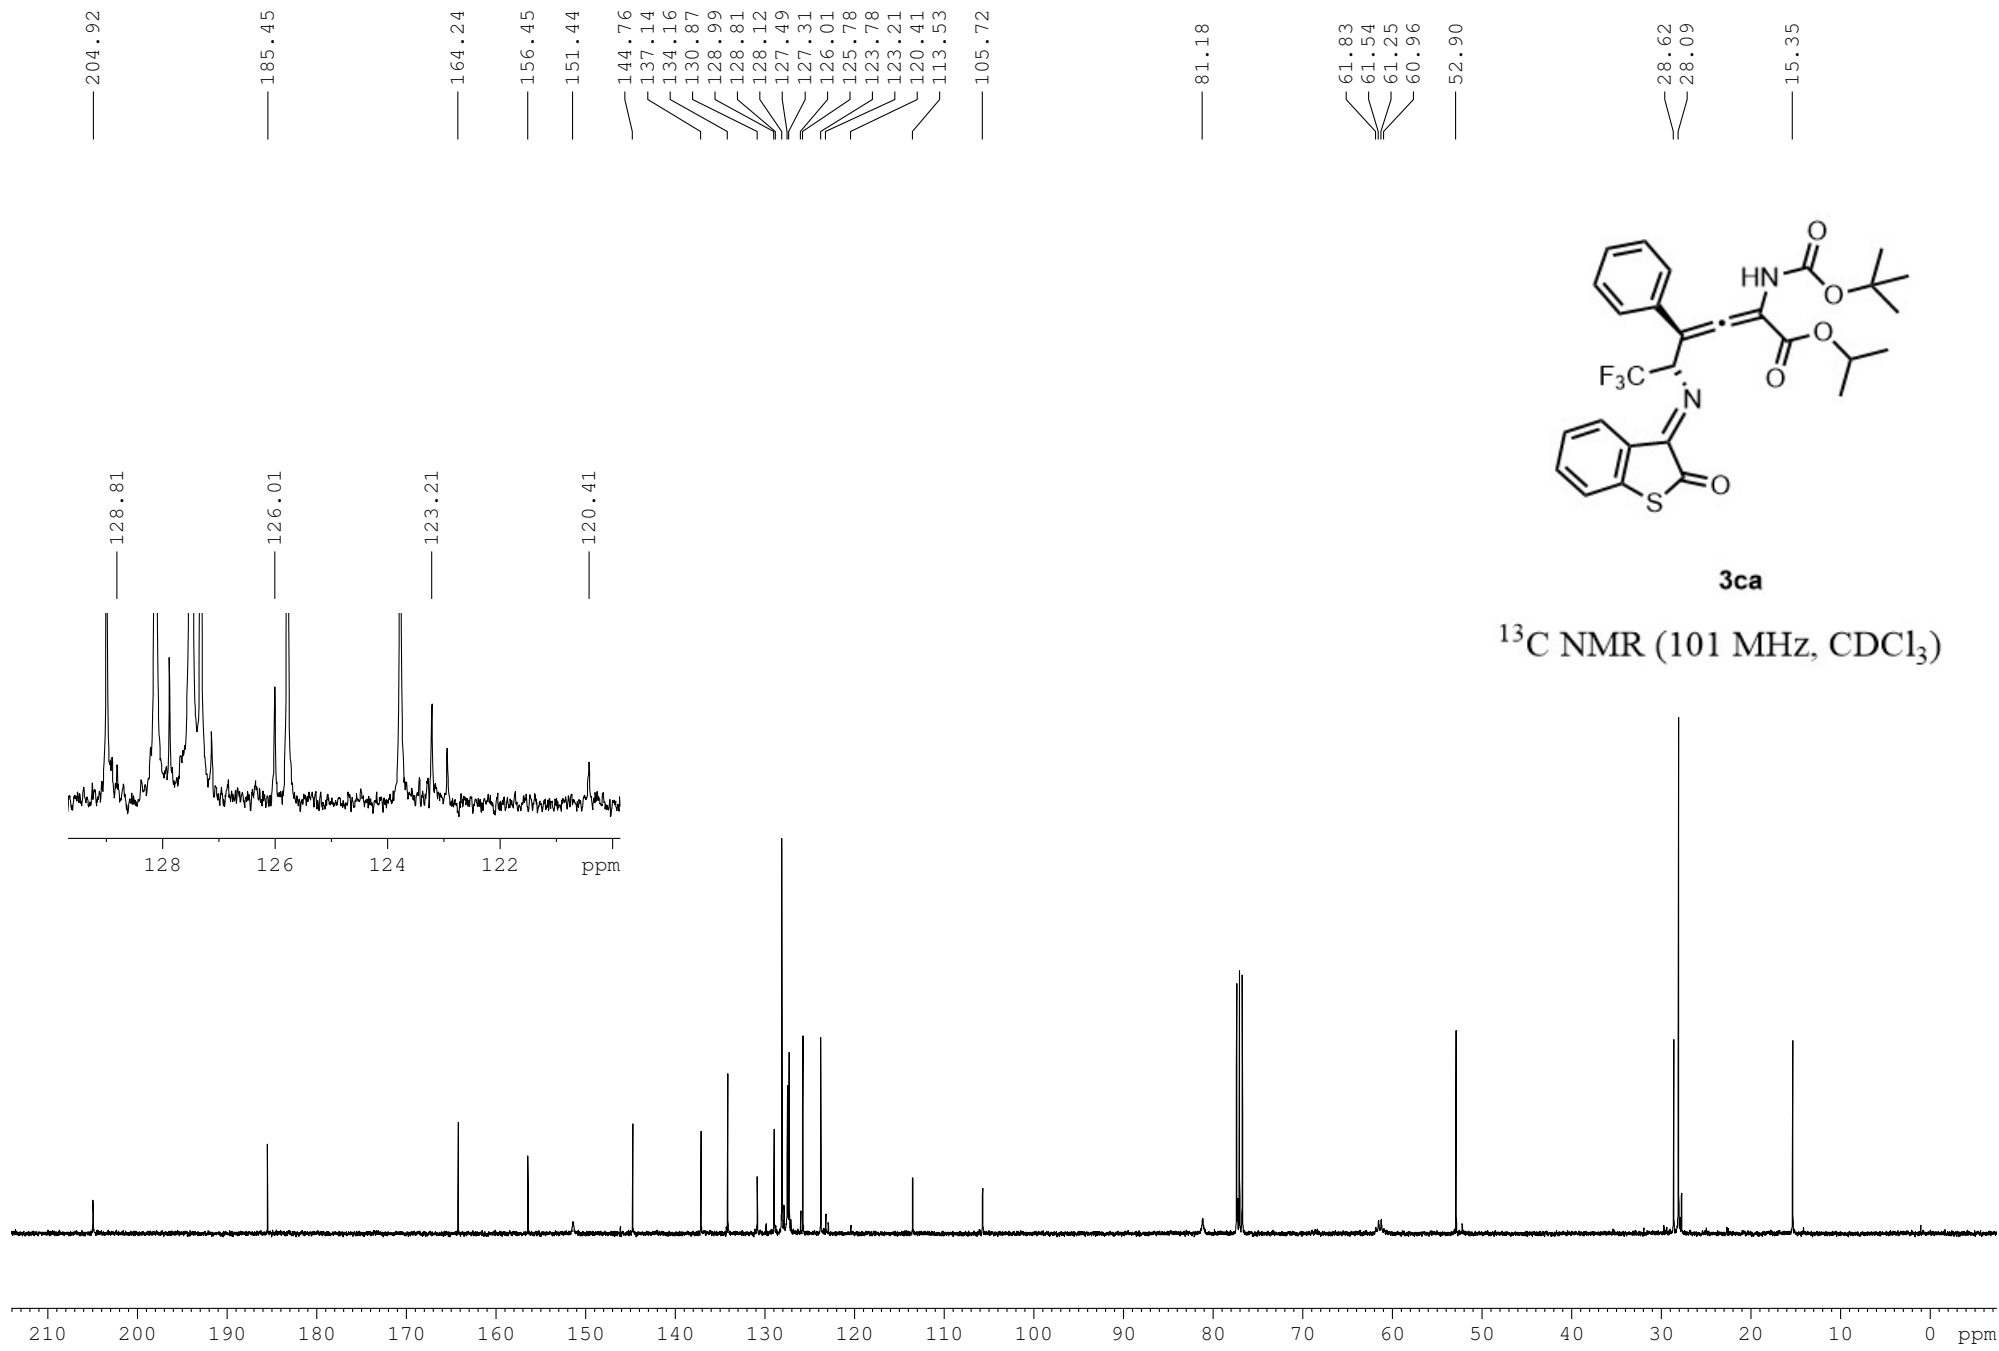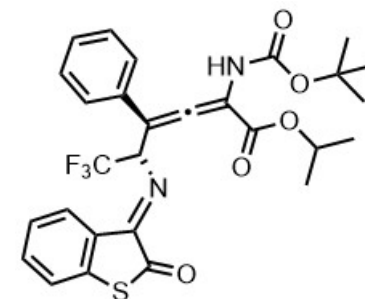

**3ca**

<sup>13</sup>C NMR (101 MHz, CDCl<sub>3</sub>)



7.81  
7.80  
7.79  
7.69  
7.67  
7.65  
7.52  
7.51  
7.50  
7.49  
7.48  
7.47  
7.33  
7.31  
7.30  
7.29  
7.28  
7.18  
7.16  
7.14  
7.11  
7.09  
7.08  
7.06  
6.69  
6.67  
6.65  
6.64

6.08

3.45

1.44

-0.00

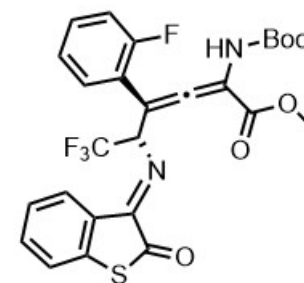

**3ea**

<sup>1</sup>H NMR (400 MHz, CDCl<sub>3</sub>)

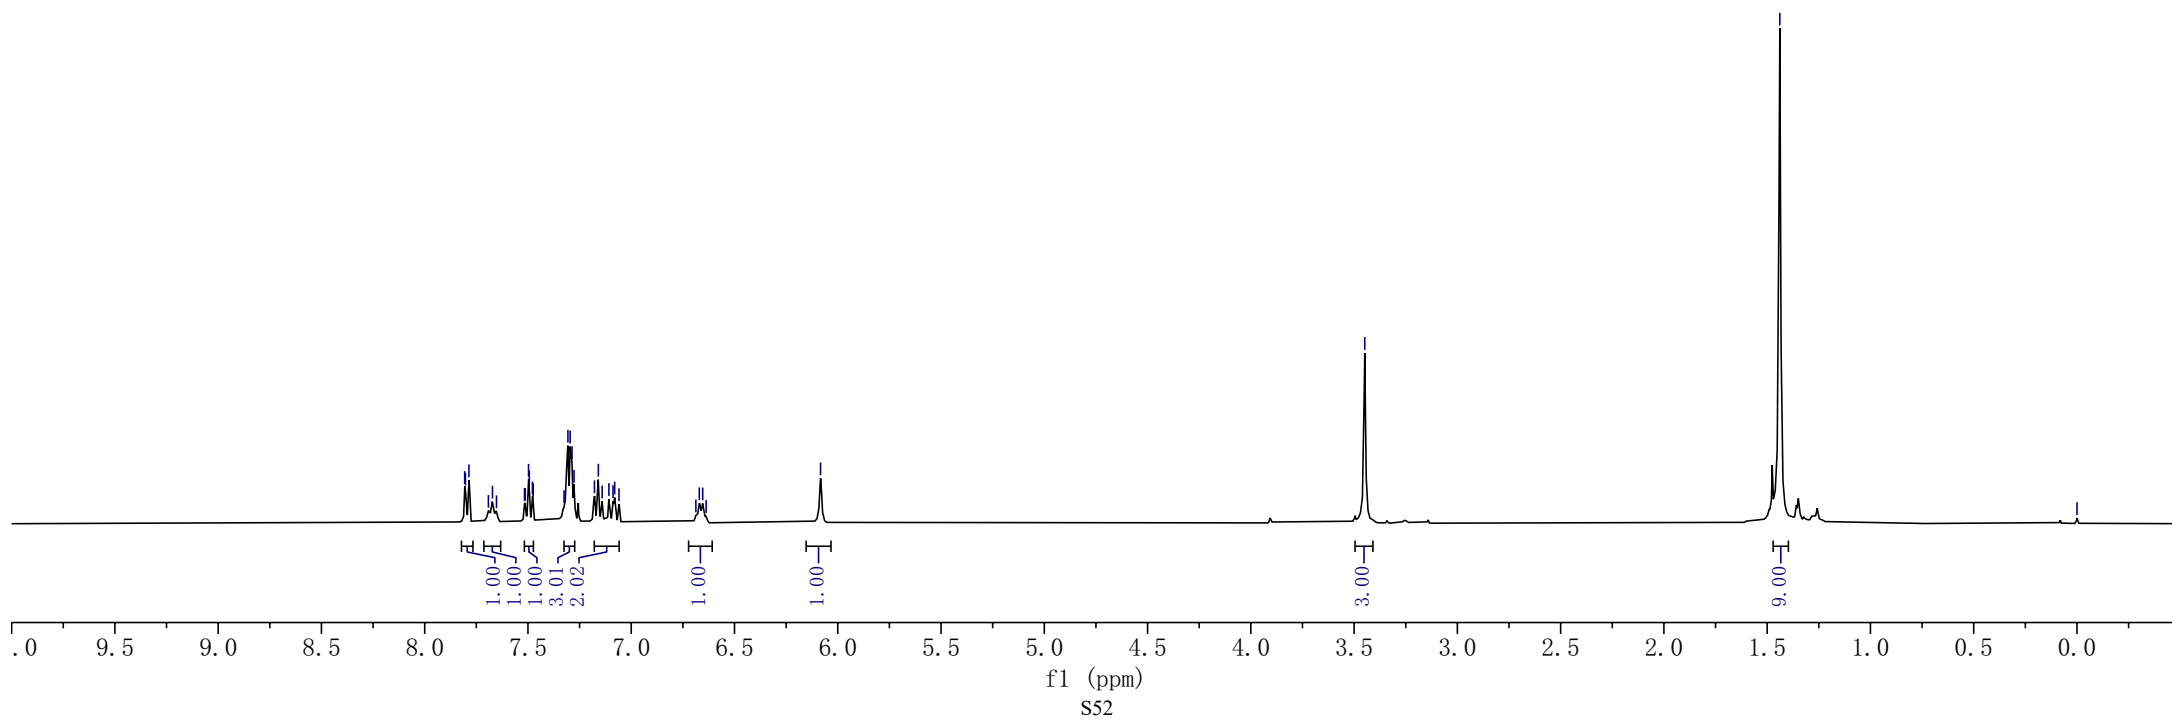

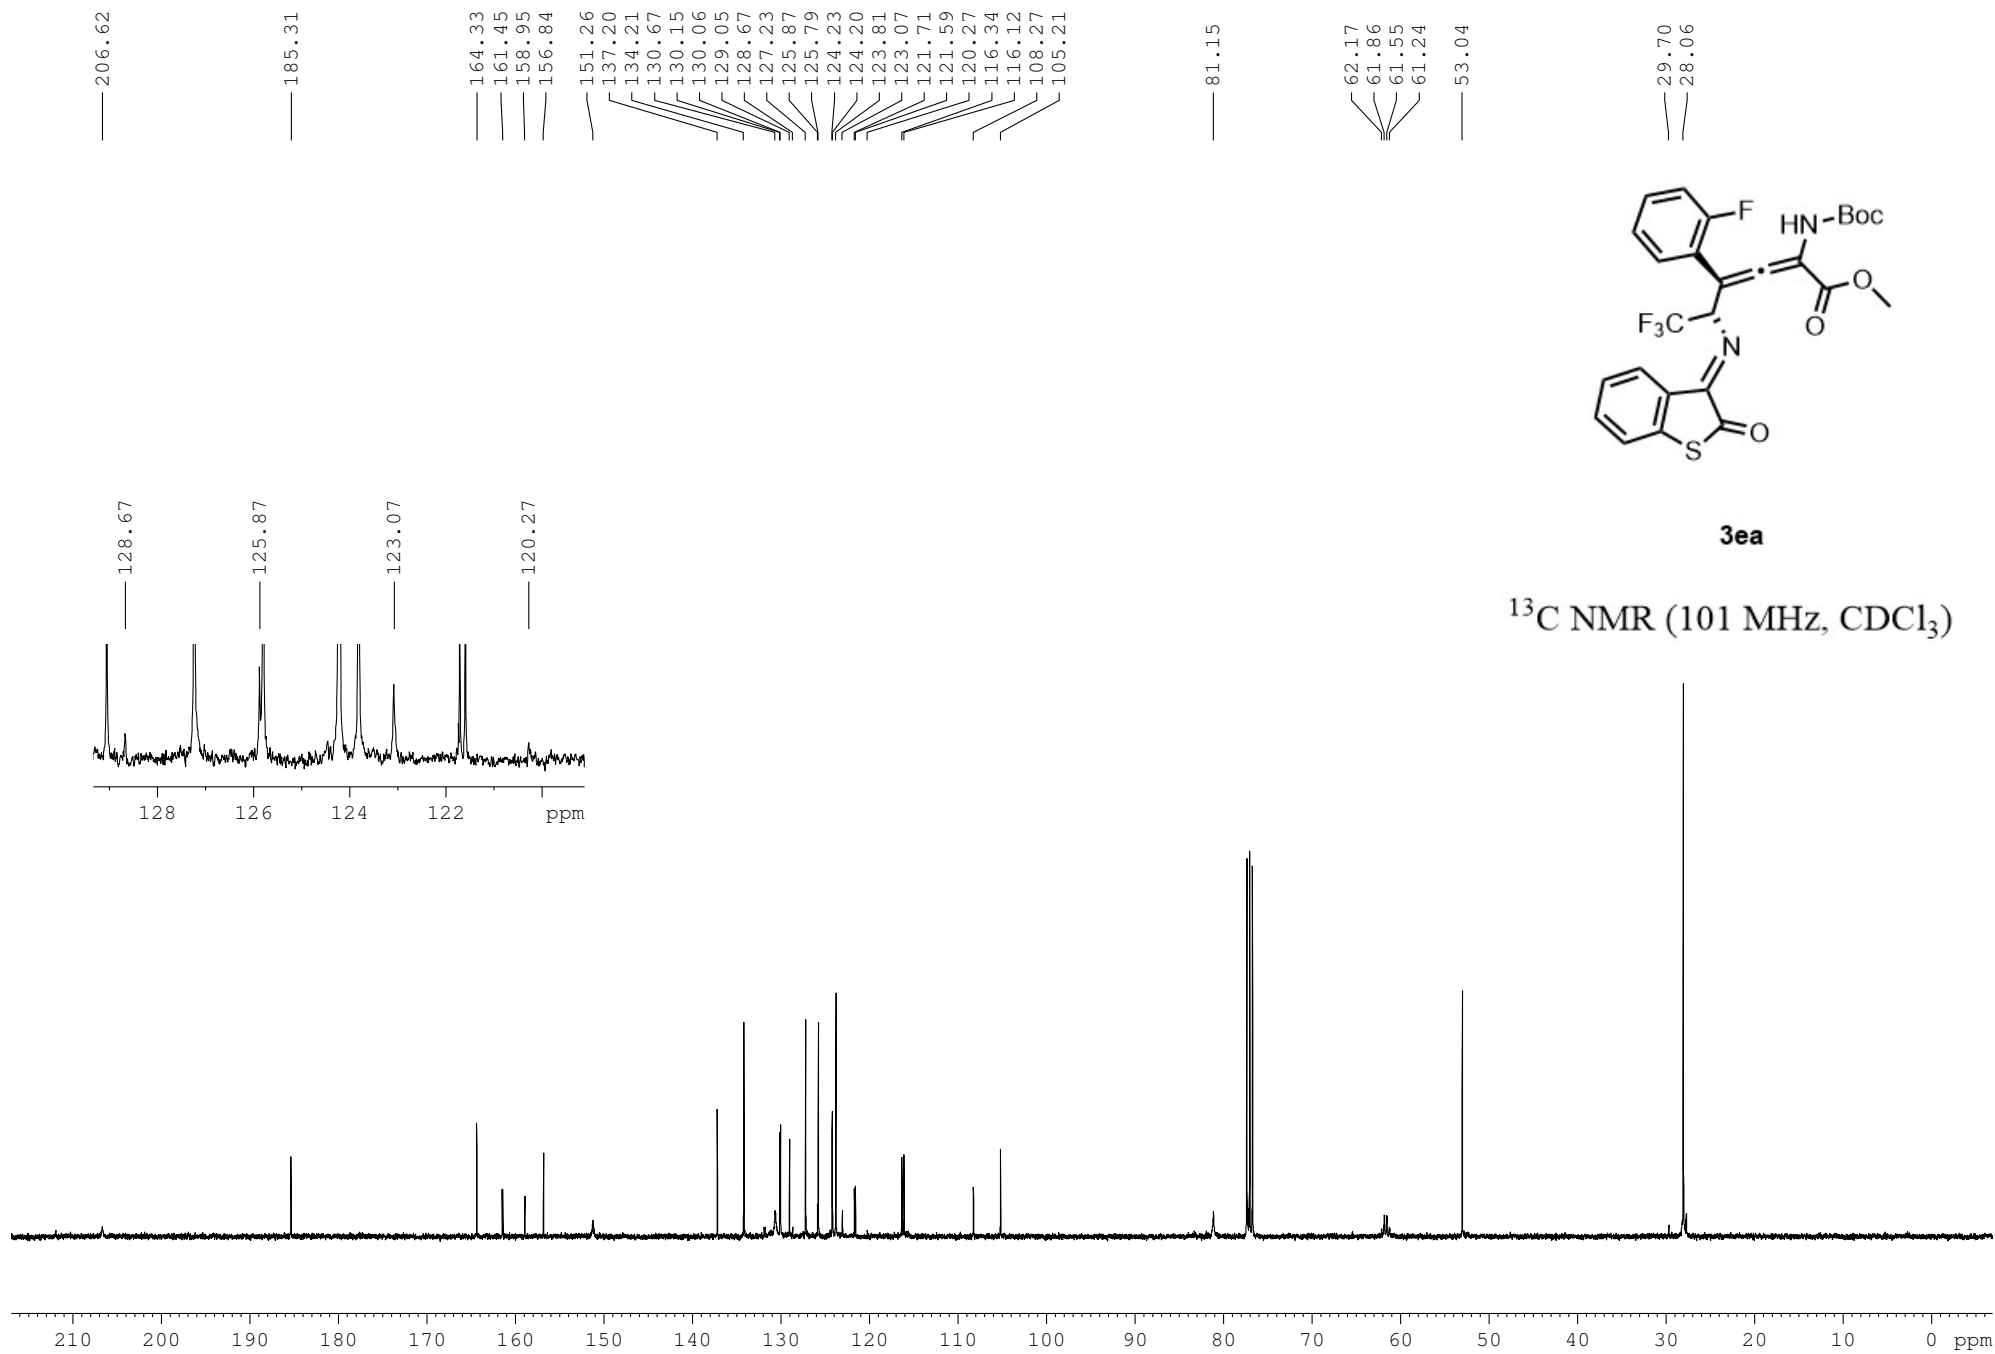

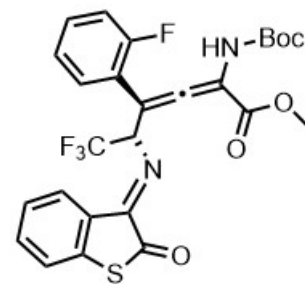

**3ea**

$^{19}\text{F}$  NMR (376 MHz,  $\text{CDCl}_3$ )

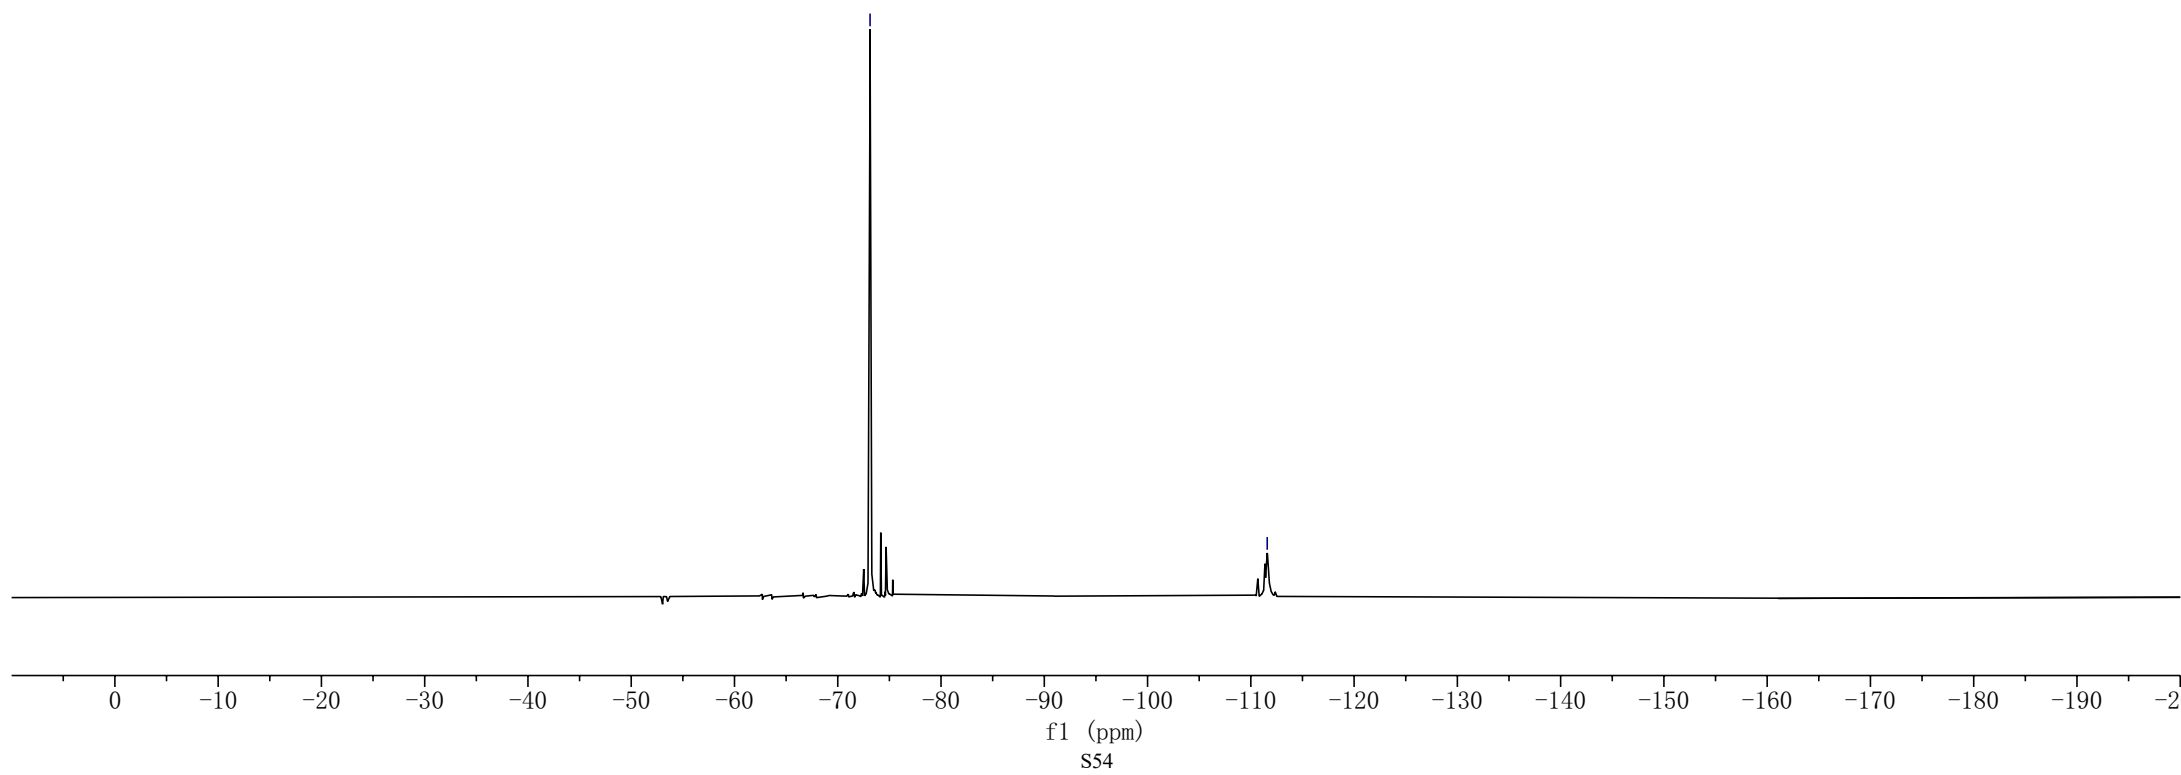

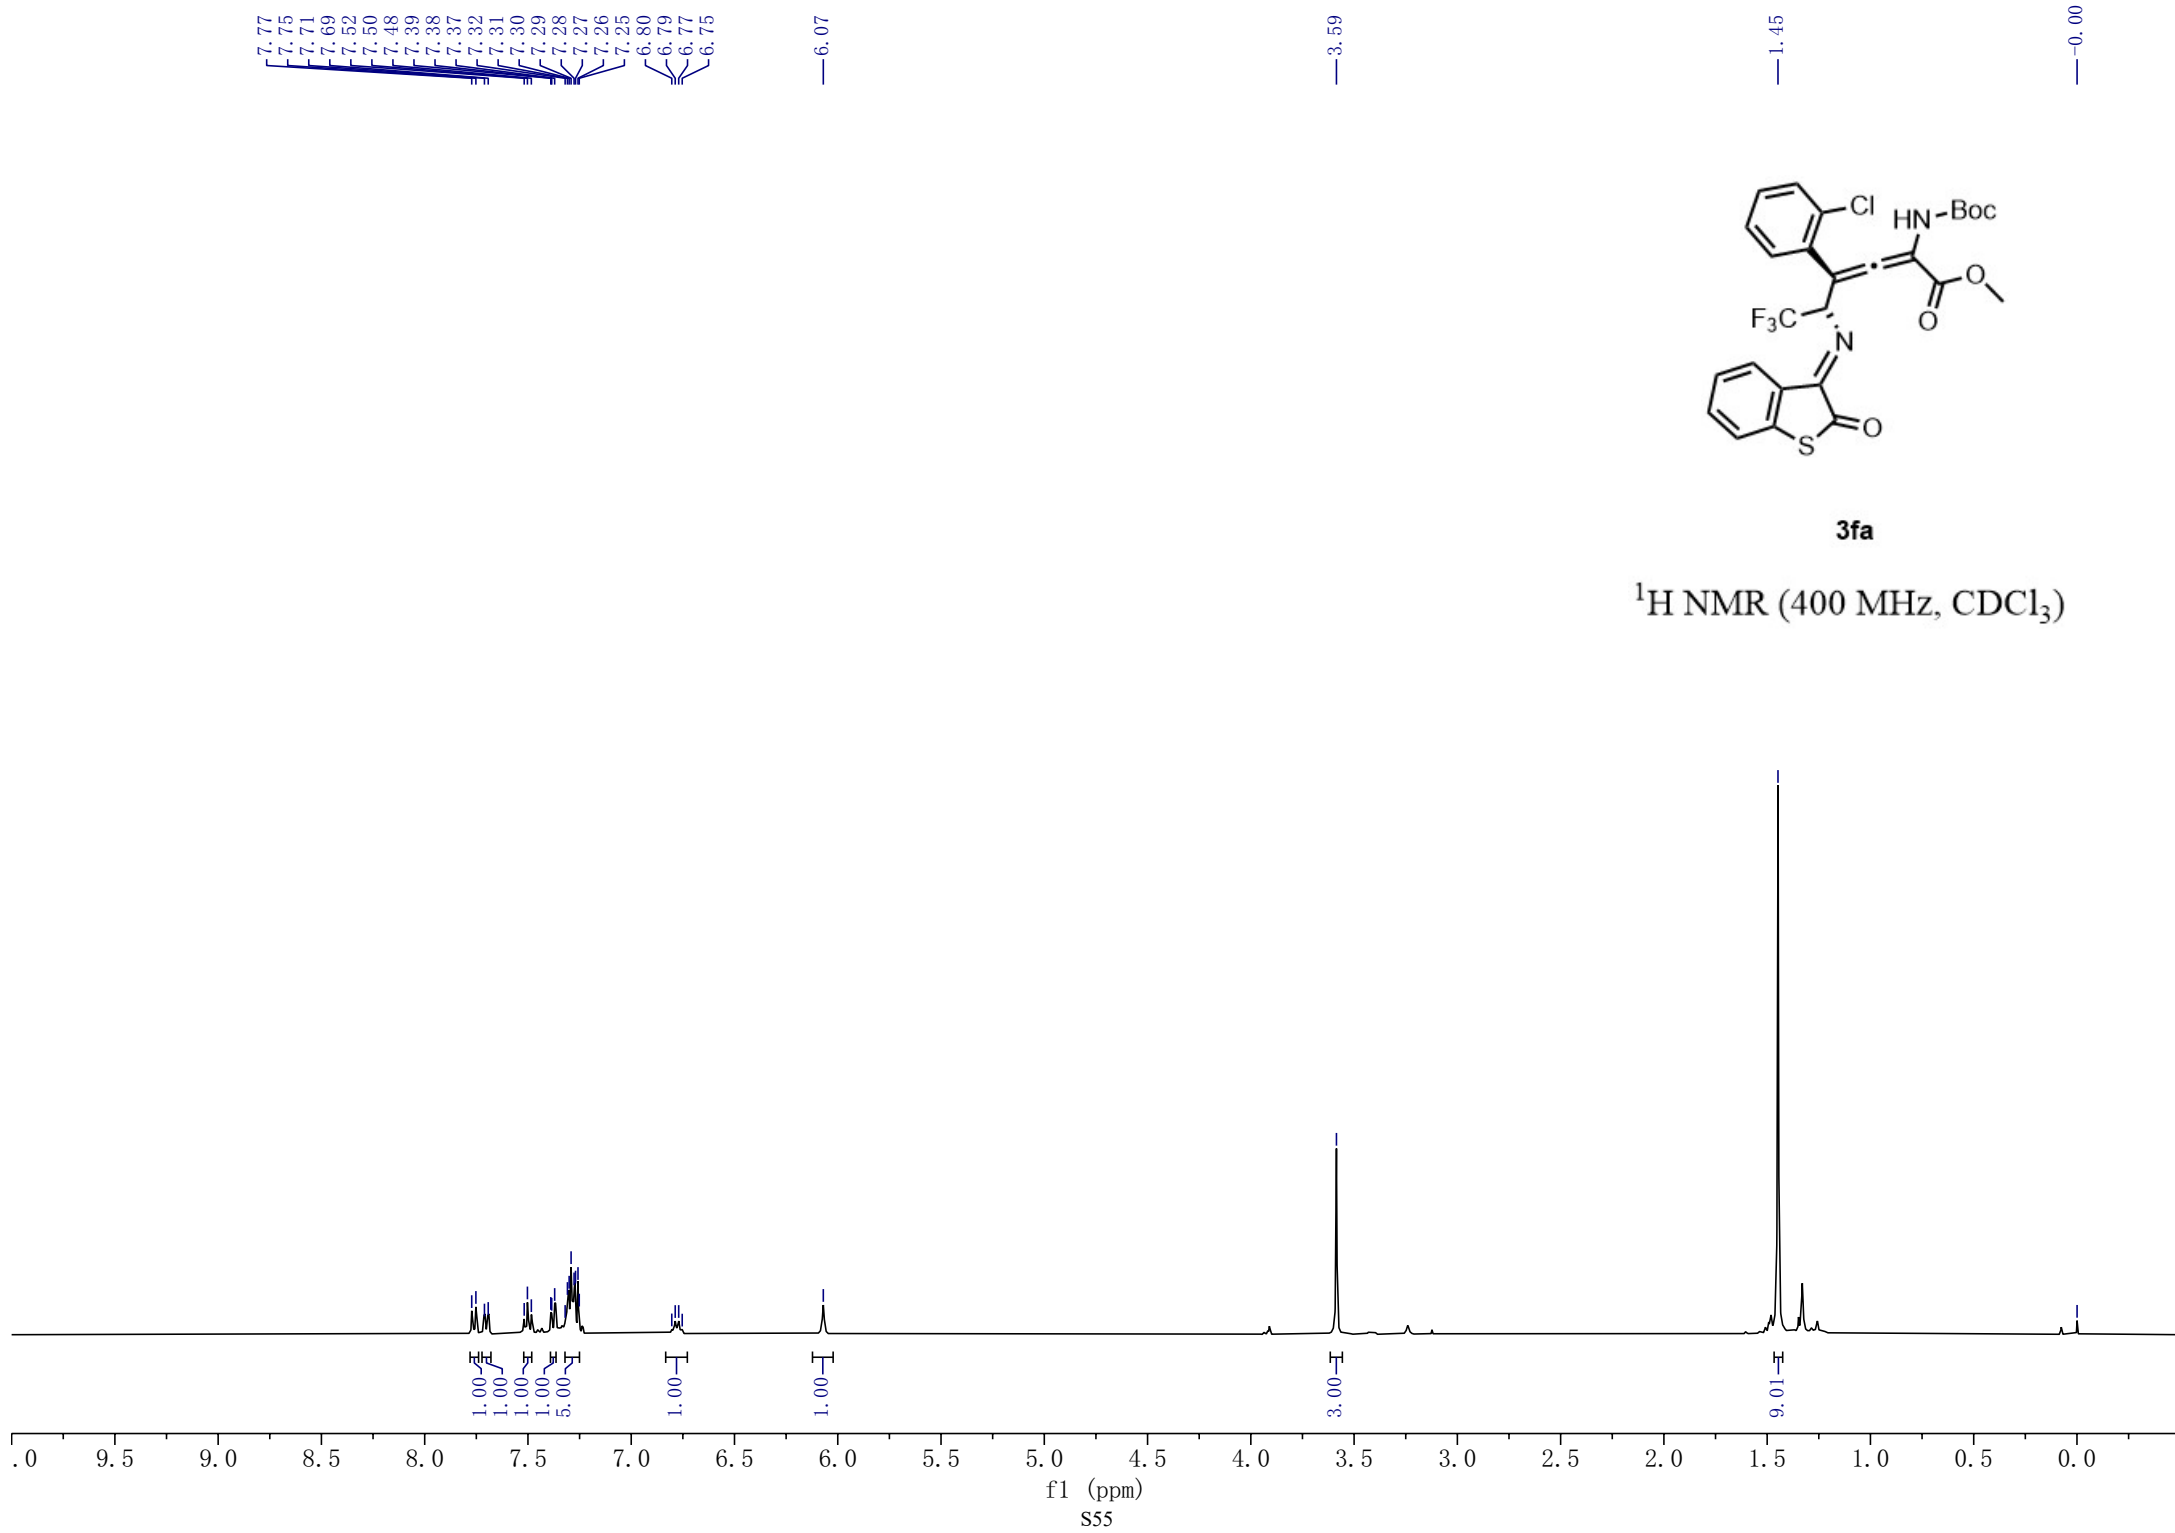

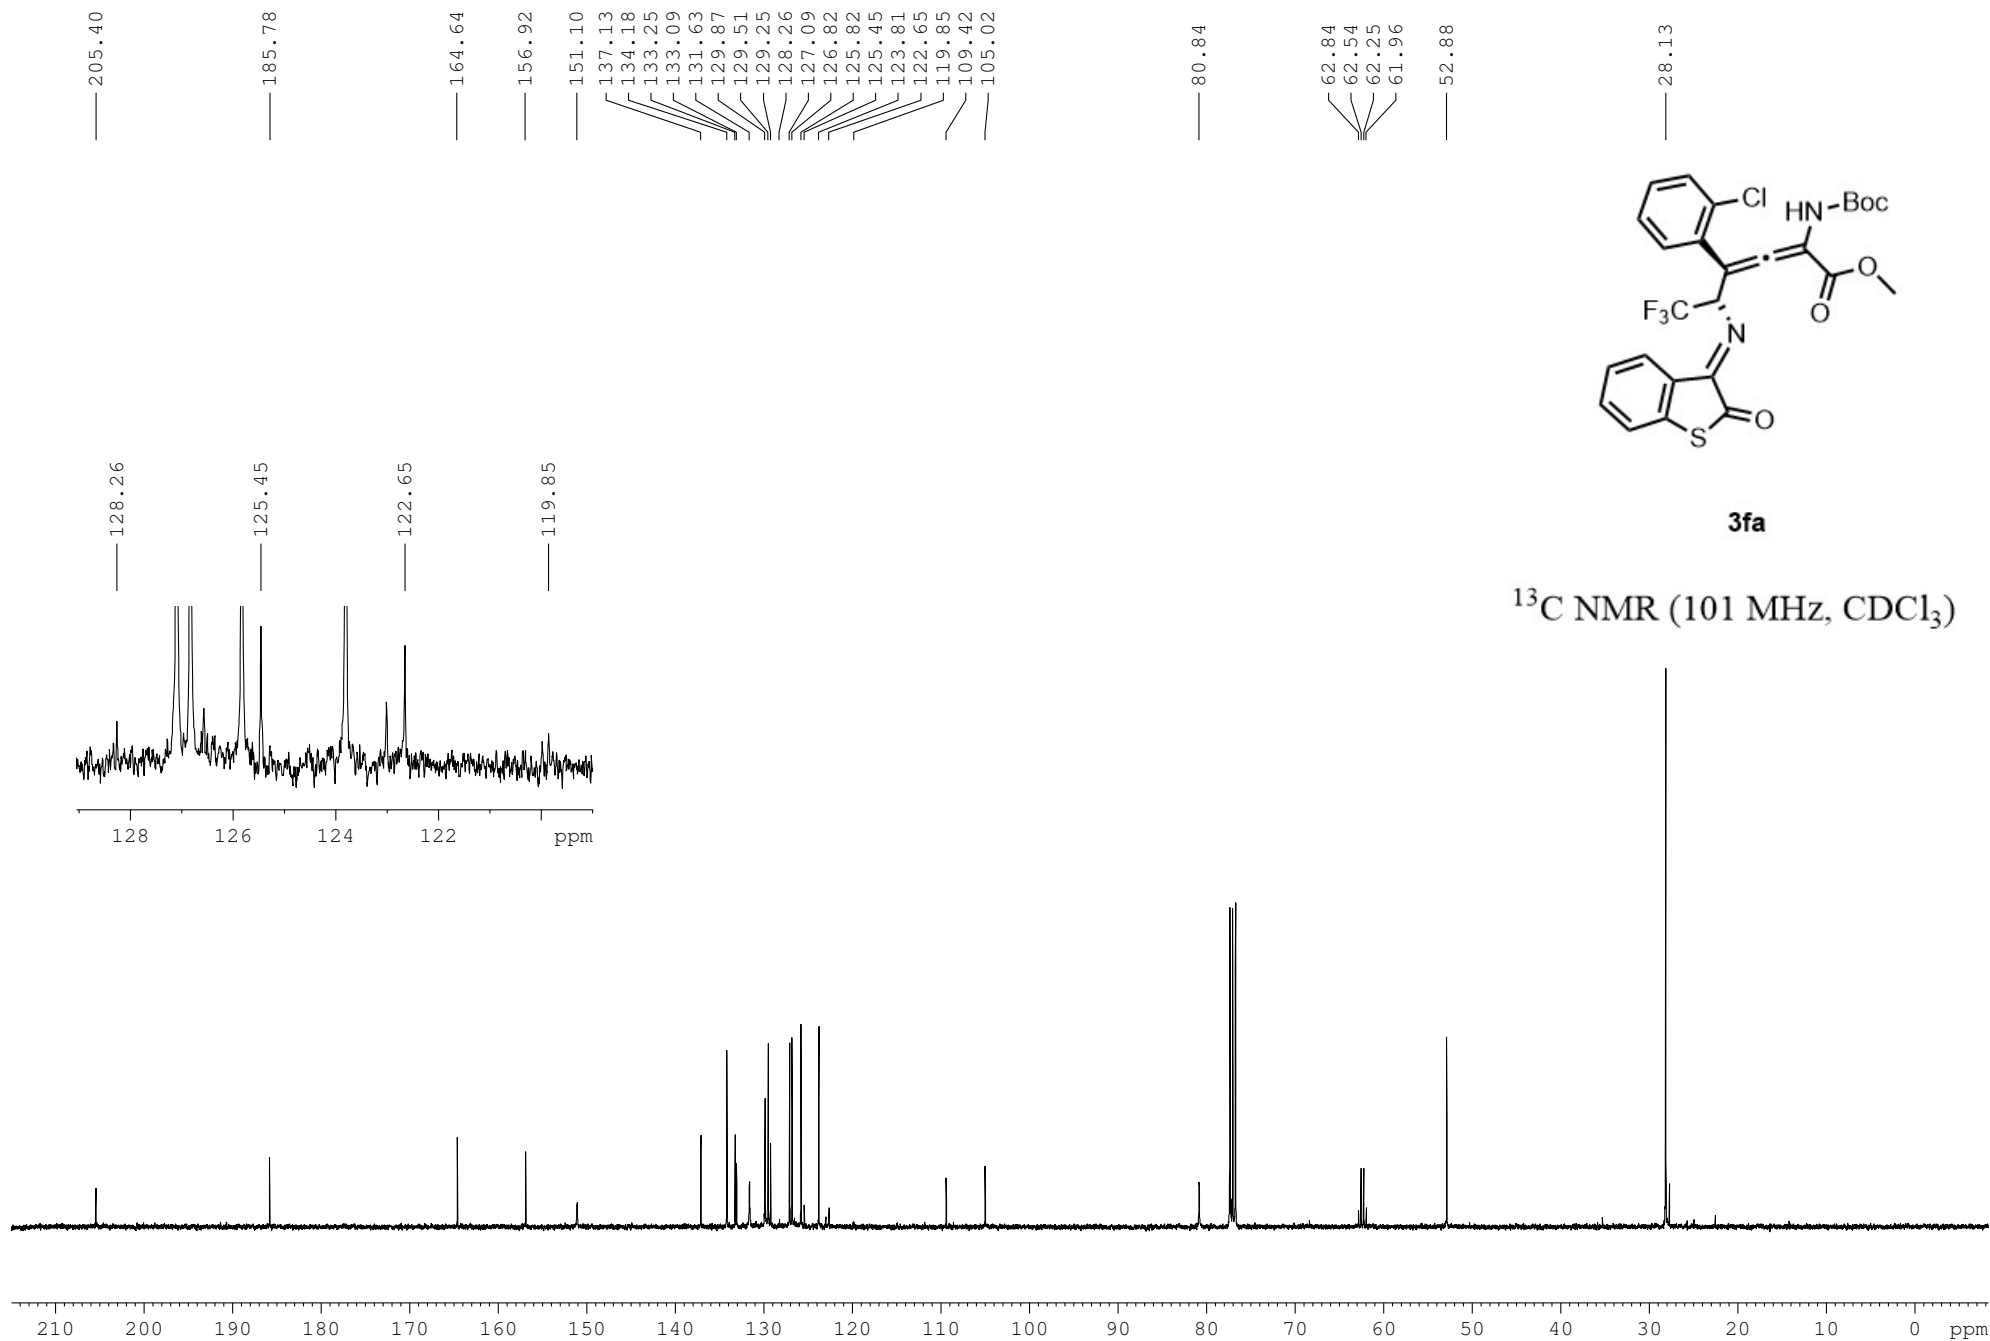



-71.92

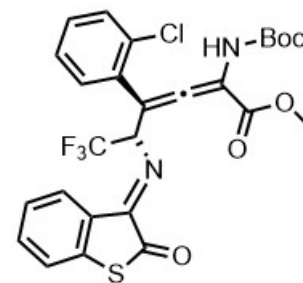

**3fa**

$^{19}\text{F}$  NMR (376 MHz,  $\text{CDCl}_3$ )

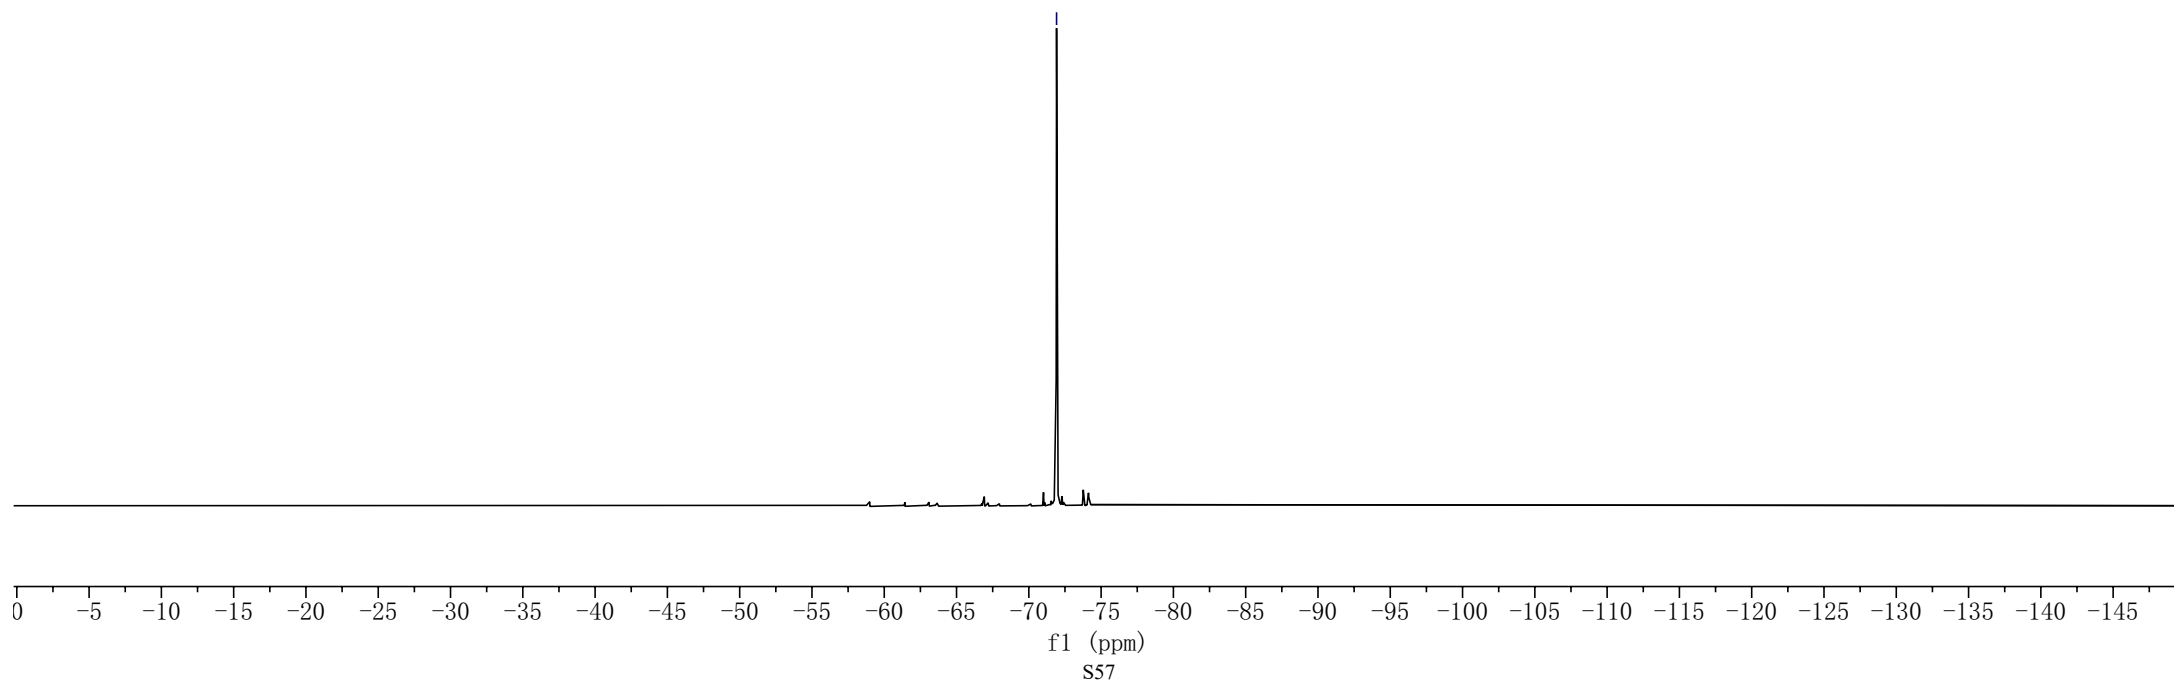

7.72  
7.70  
7.46  
7.45  
7.44  
7.43  
7.41  
7.39  
7.21  
7.20  
7.19  
7.18  
7.16  
7.14  
7.13  
7.12  
7.11  
7.10  
7.09  
7.08  
6.61  
6.59  
6.57  
6.55

5.94

3.55

2.32

1.35

-0.00

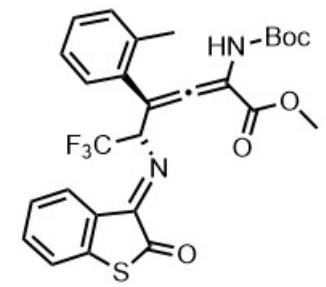

3ga

<sup>1</sup>H NMR (400 MHz, CDCl<sub>3</sub>)

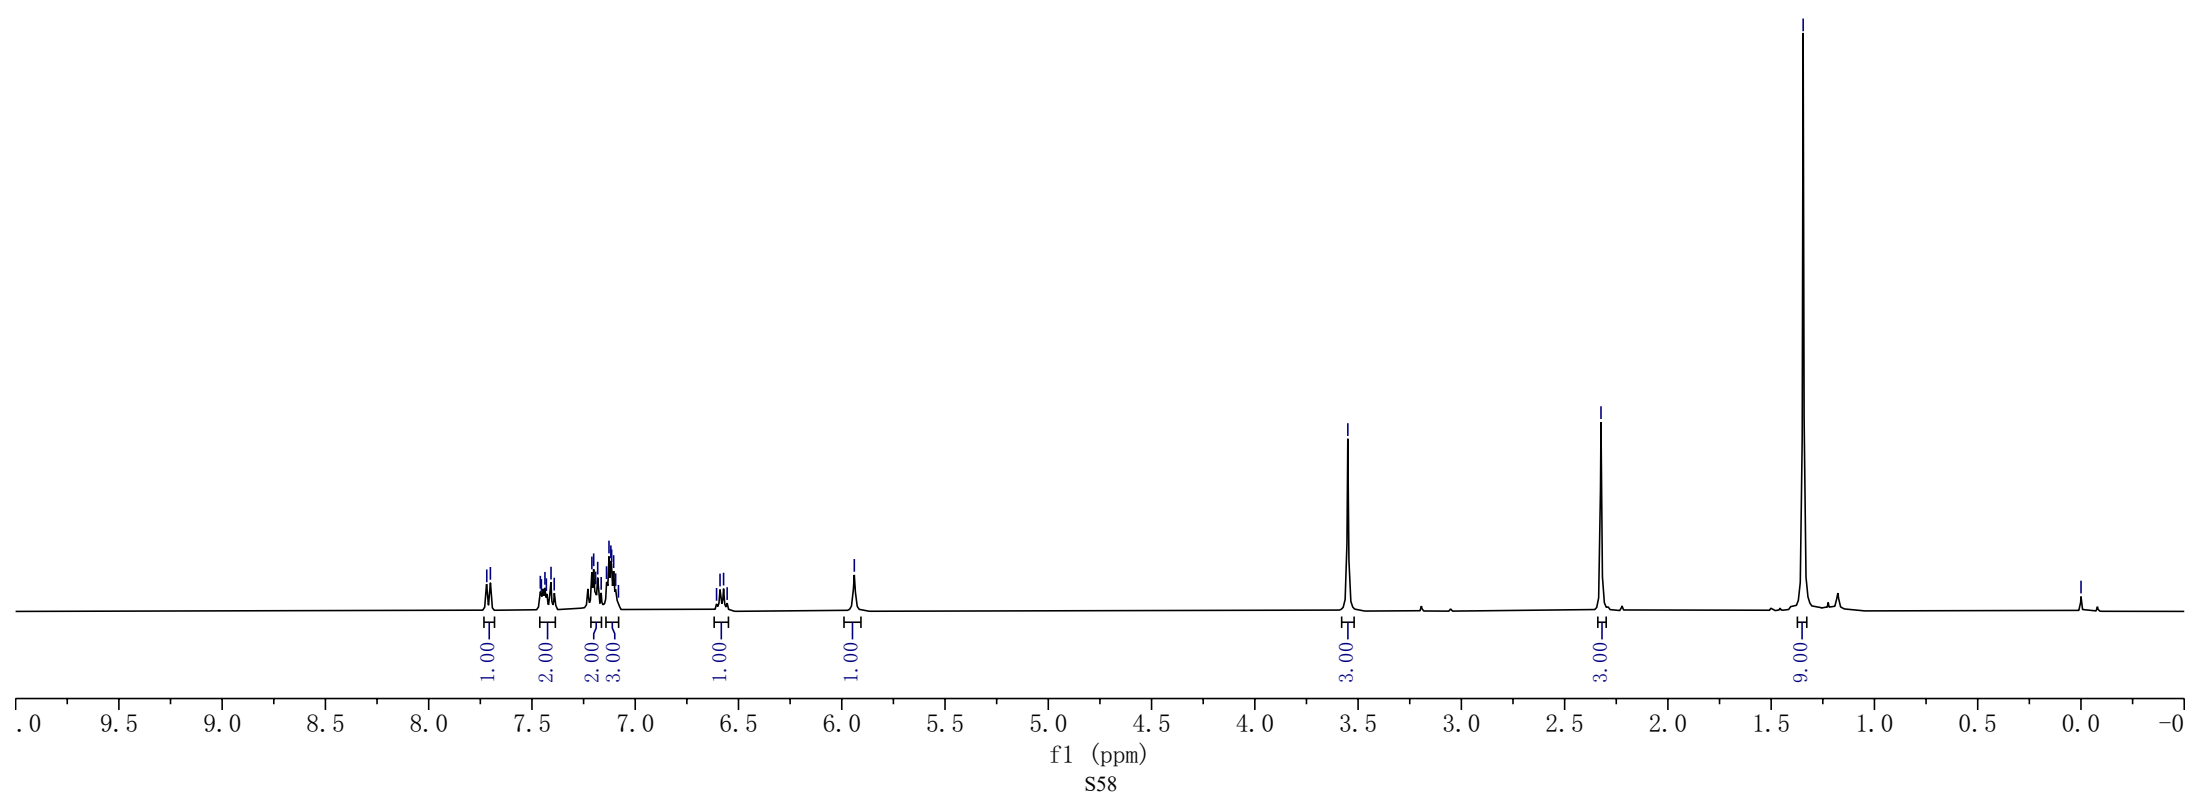

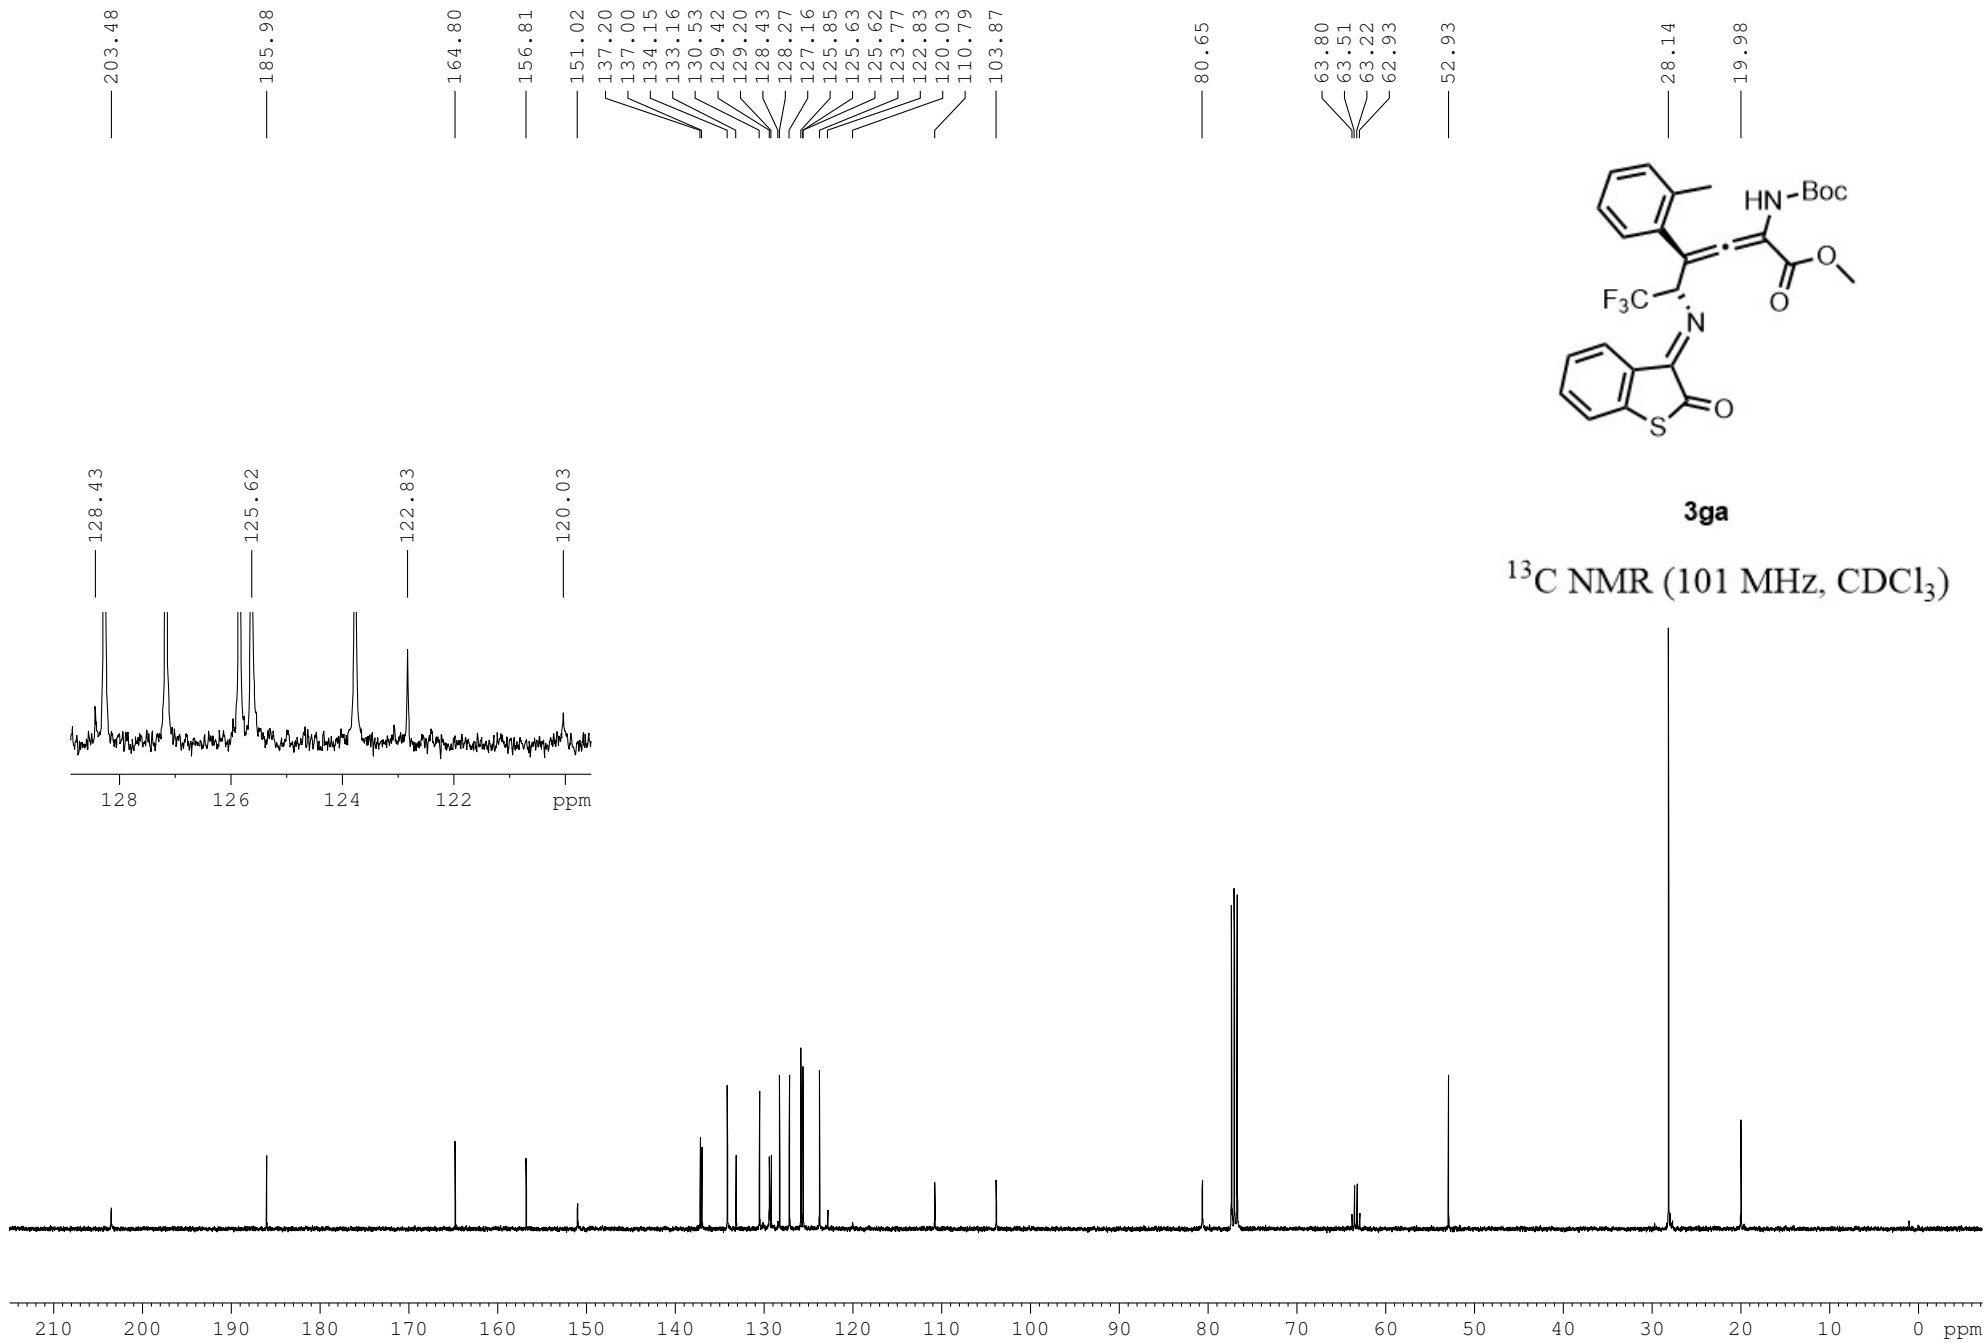

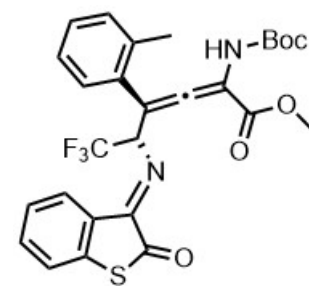

**3ga**

$^{19}\text{F}$  NMR (376 MHz,  $\text{CDCl}_3$ )

—71.61

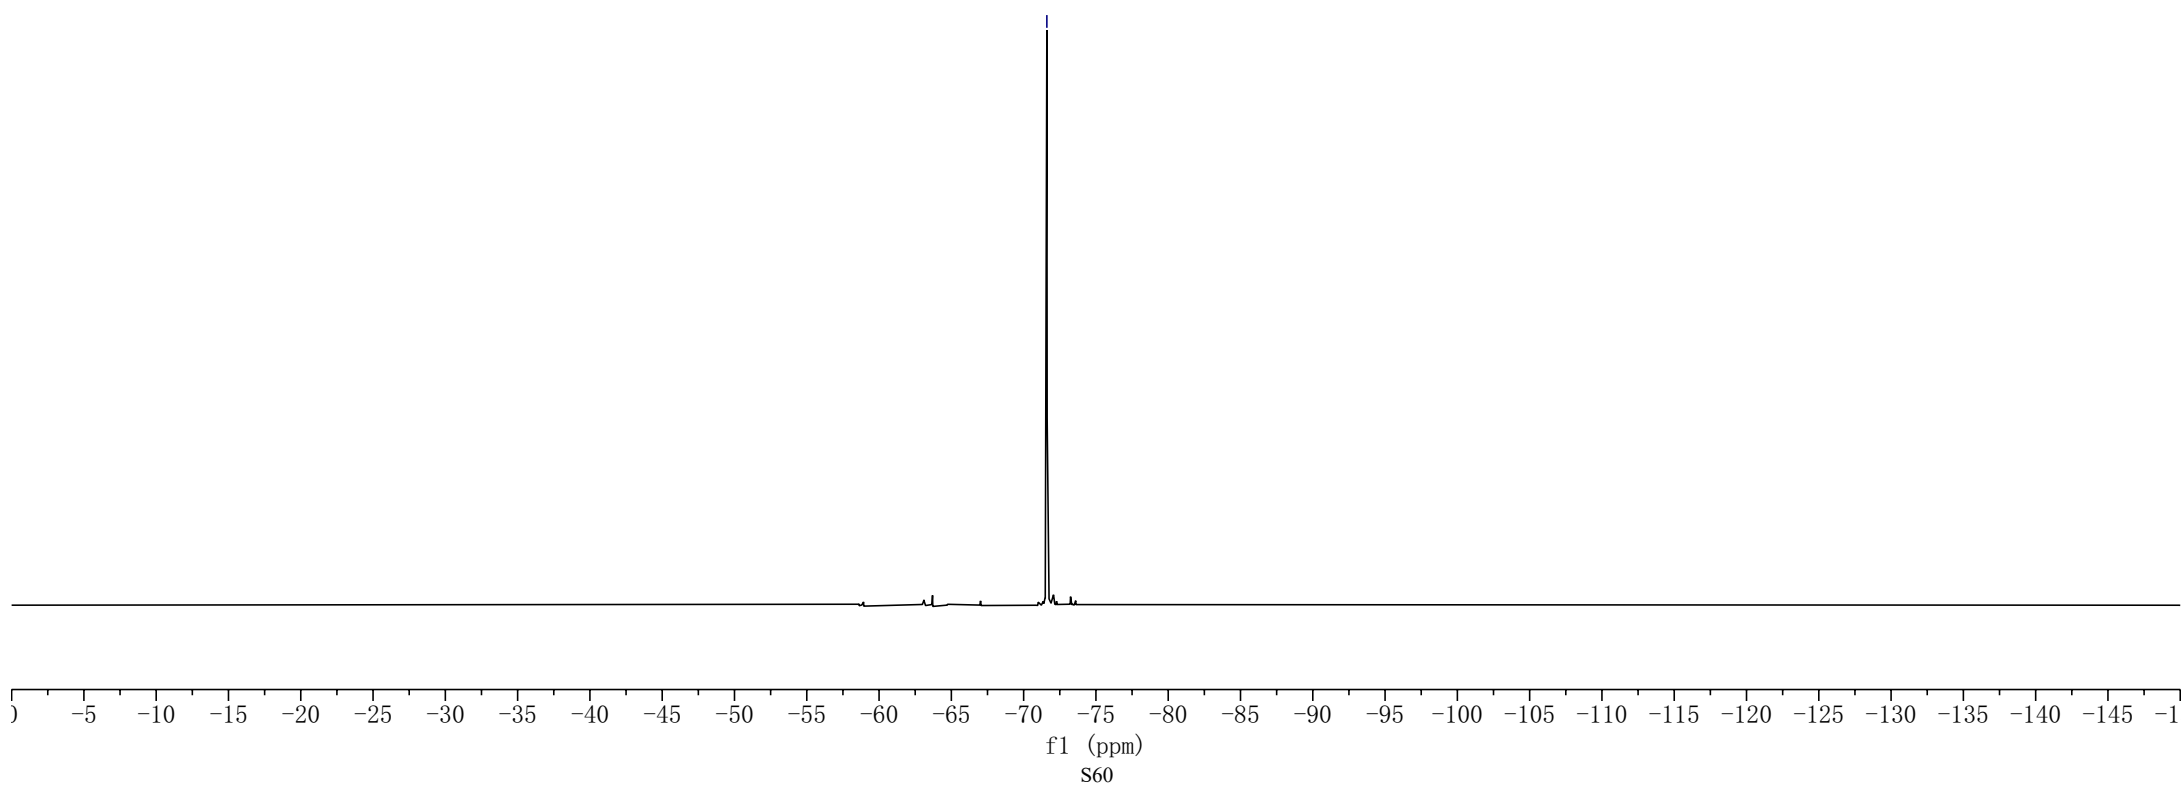

7.75  
7.73  
7.46  
7.45  
7.44  
7.43  
7.41  
7.39  
7.24  
7.23  
7.22  
7.21  
7.20  
7.19  
7.07  
7.05  
6.43  
6.41  
6.39  
6.38  
6.04

3.26

2.30

1.37

0.00

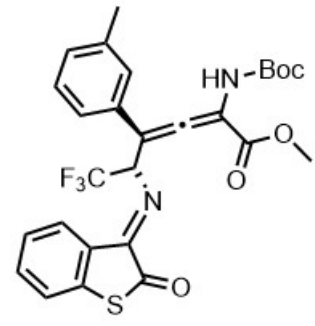

3ha

<sup>1</sup>H NMR (400 MHz, CDCl<sub>3</sub>)

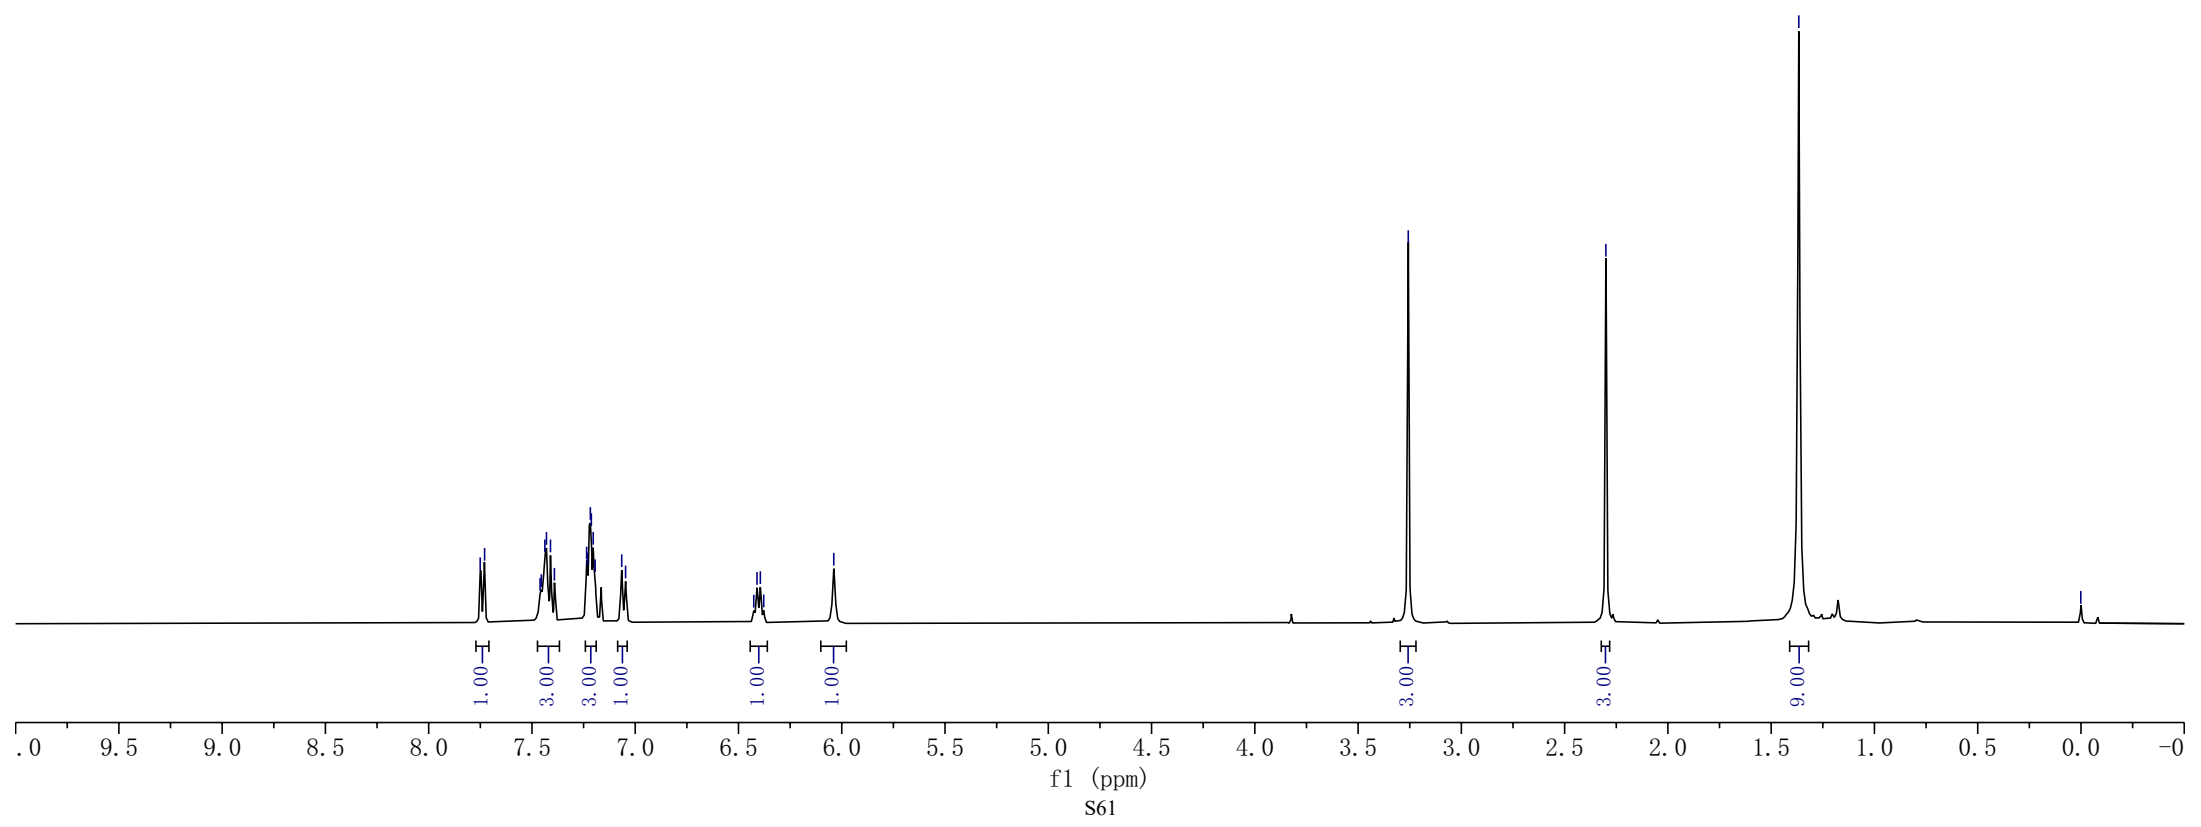

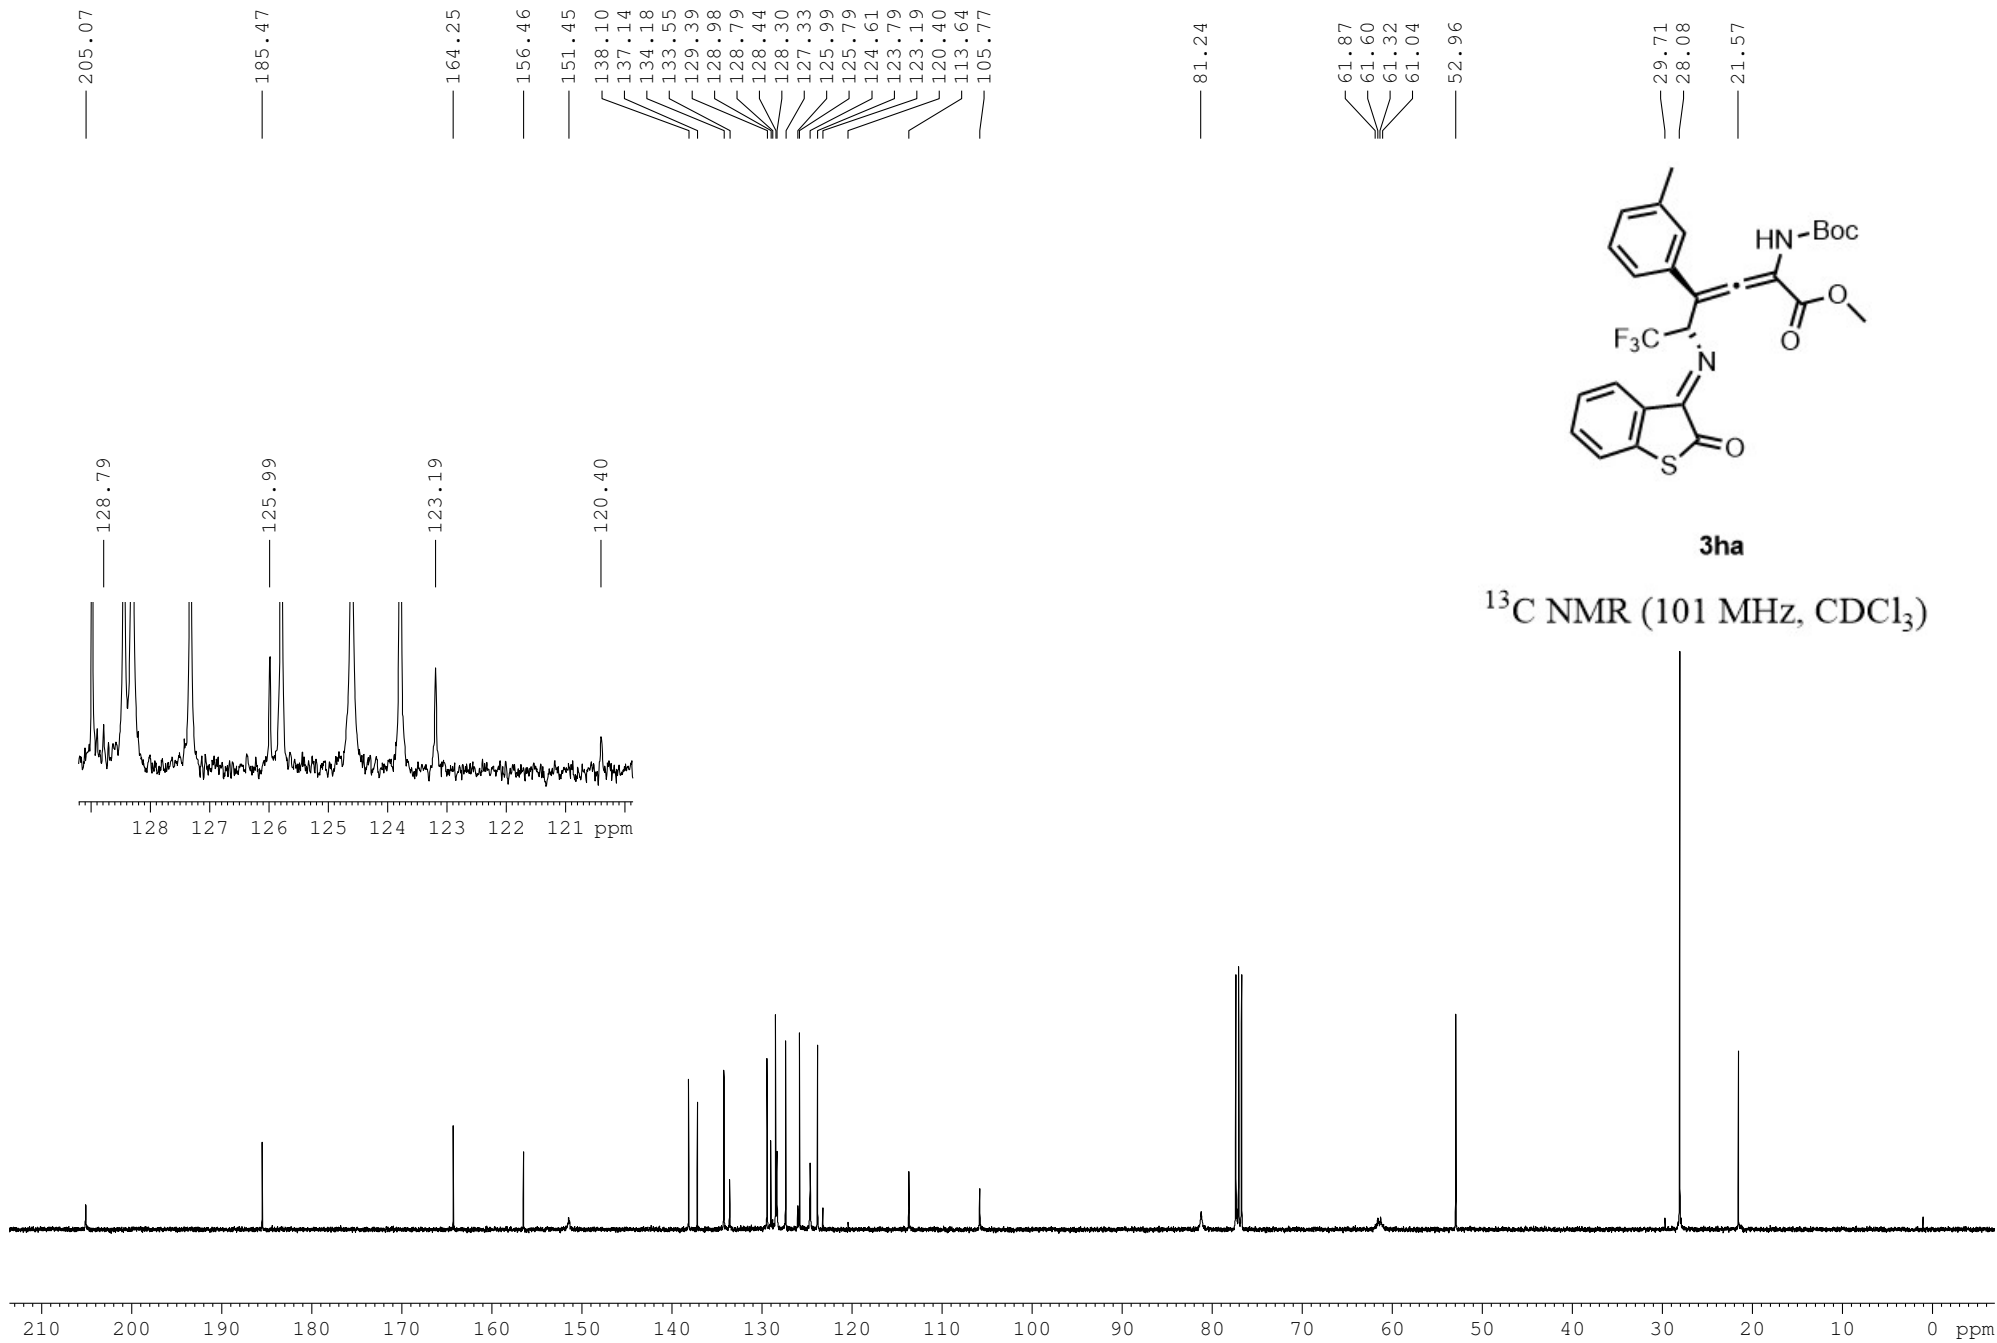

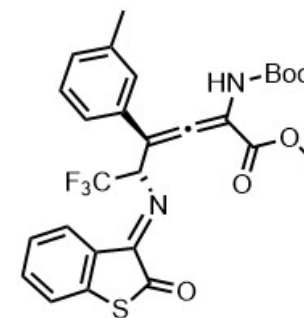

**3ha**

$^{19}\text{F}$  NMR (376 MHz,  $\text{CDCl}_3$ )

— -73.30

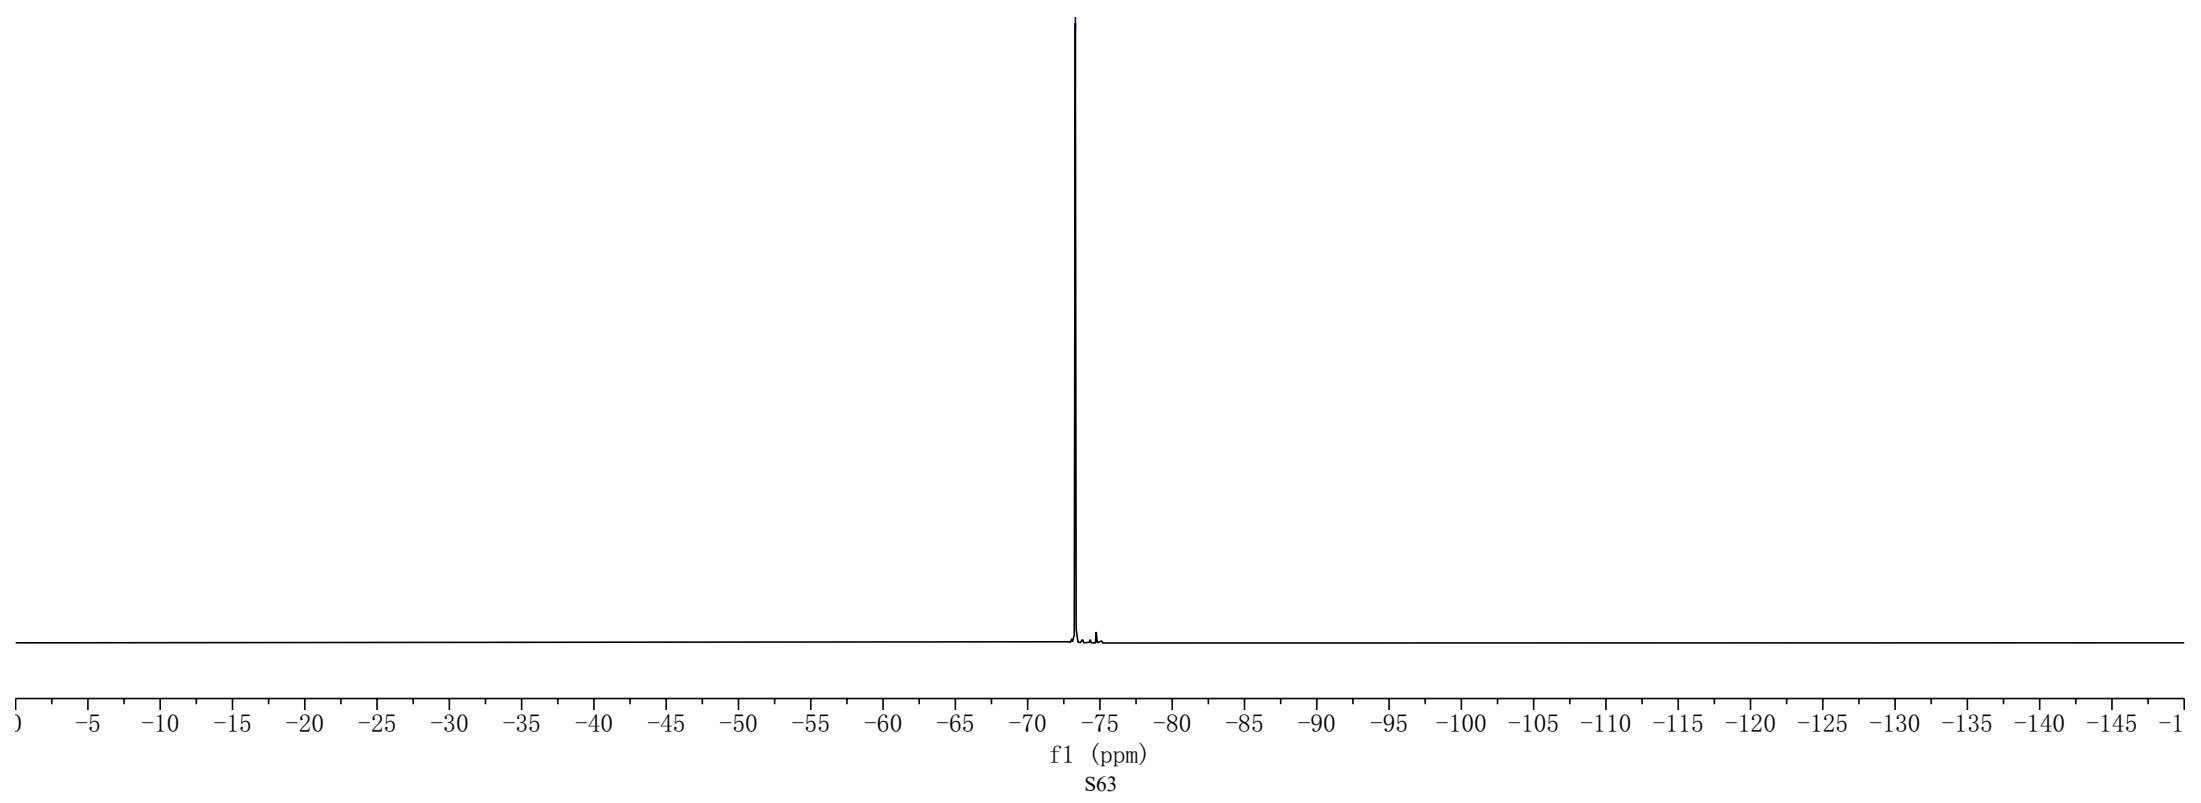

7.76  
7.75  
7.74  
7.73  
7.44  
7.42  
7.40  
7.29  
7.28  
7.27  
7.26  
7.25  
7.24  
7.23  
7.22  
7.21  
6.82  
6.81  
6.80  
6.79  
6.40  
6.39  
6.37  
6.35  
6.03

3.75

3.27

1.37

0.00

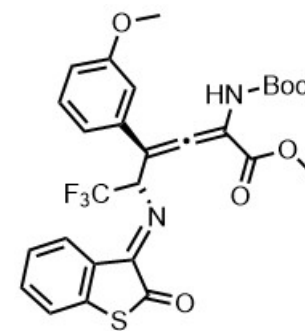

**3ia**

<sup>1</sup>H NMR (400 MHz, CDCl<sub>3</sub>)

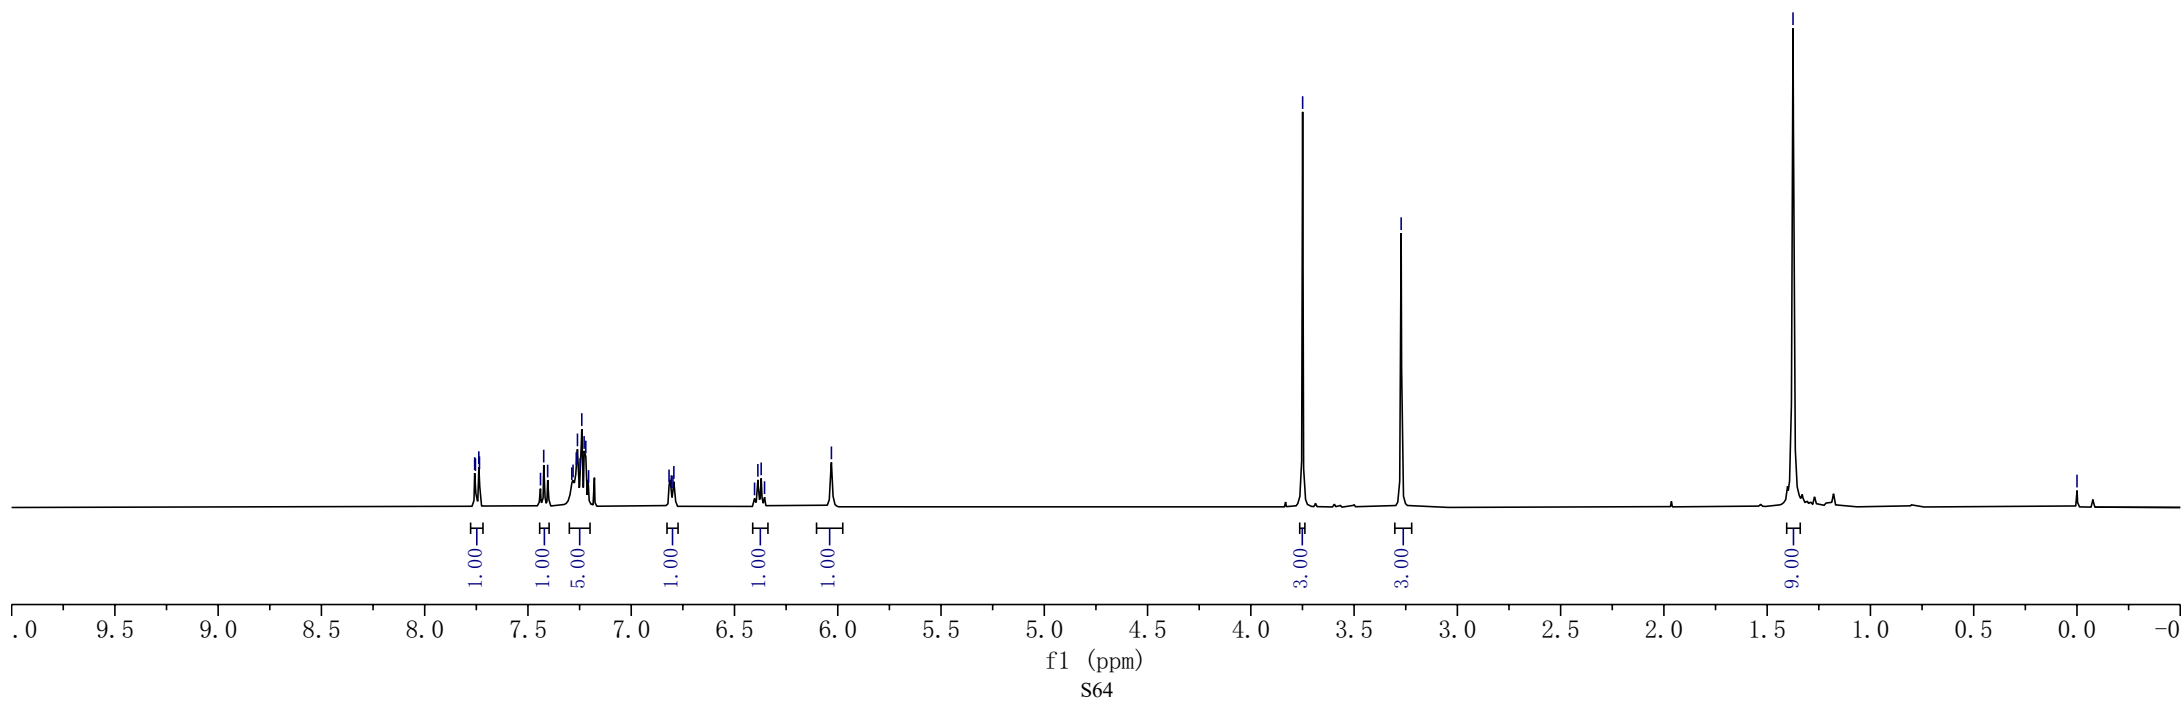



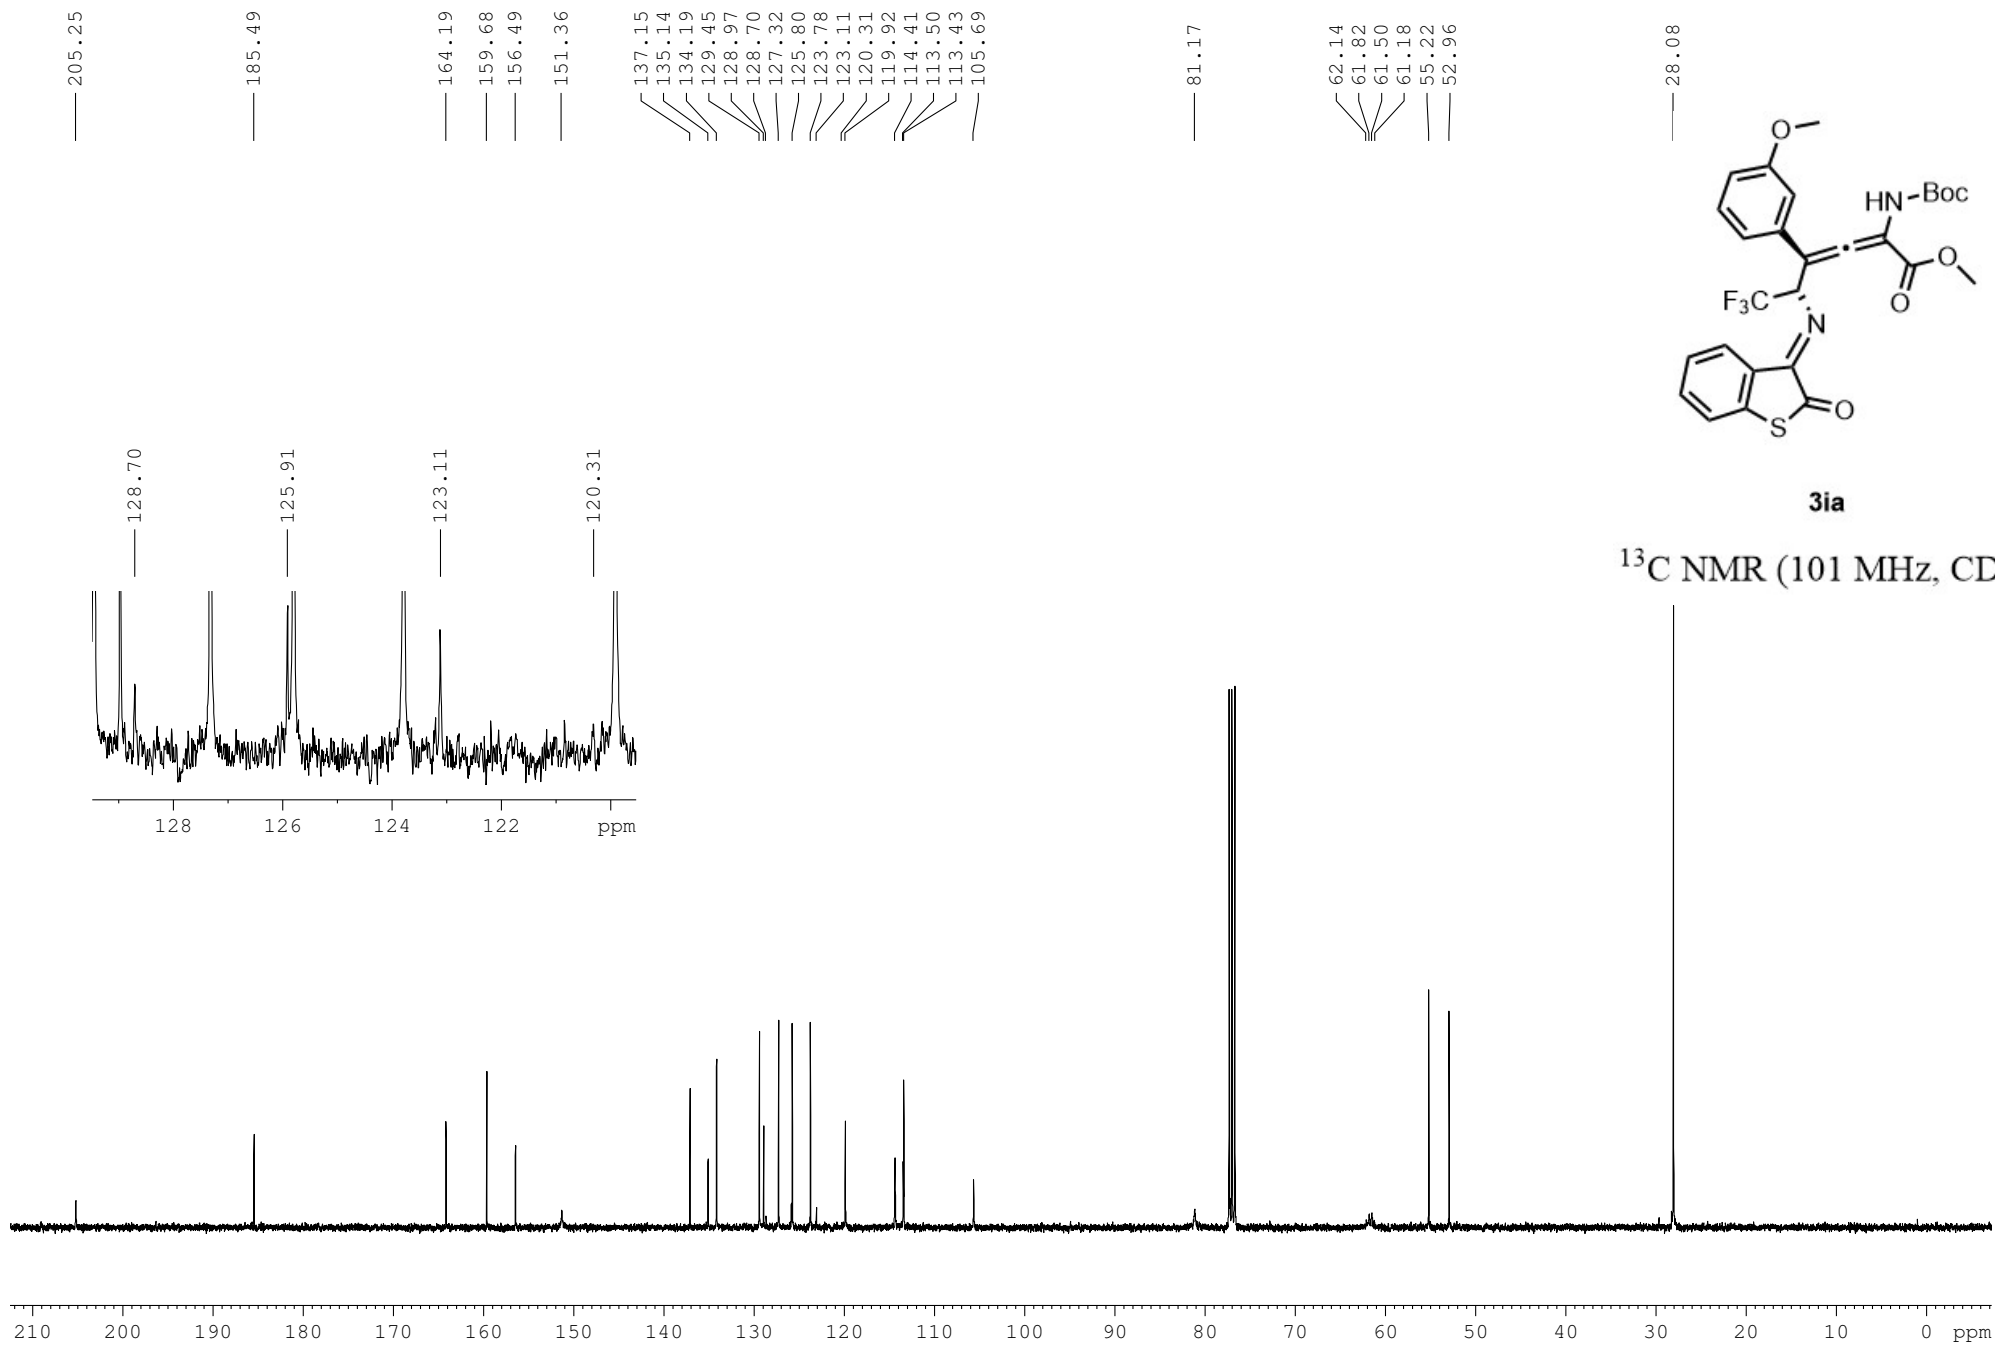

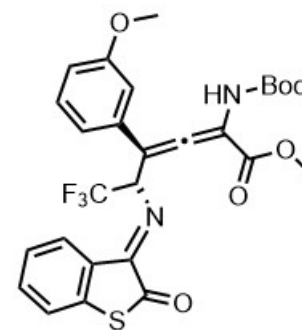

**3ia**

$^{19}\text{F}$  NMR (376 MHz,  $\text{CDCl}_3$ )

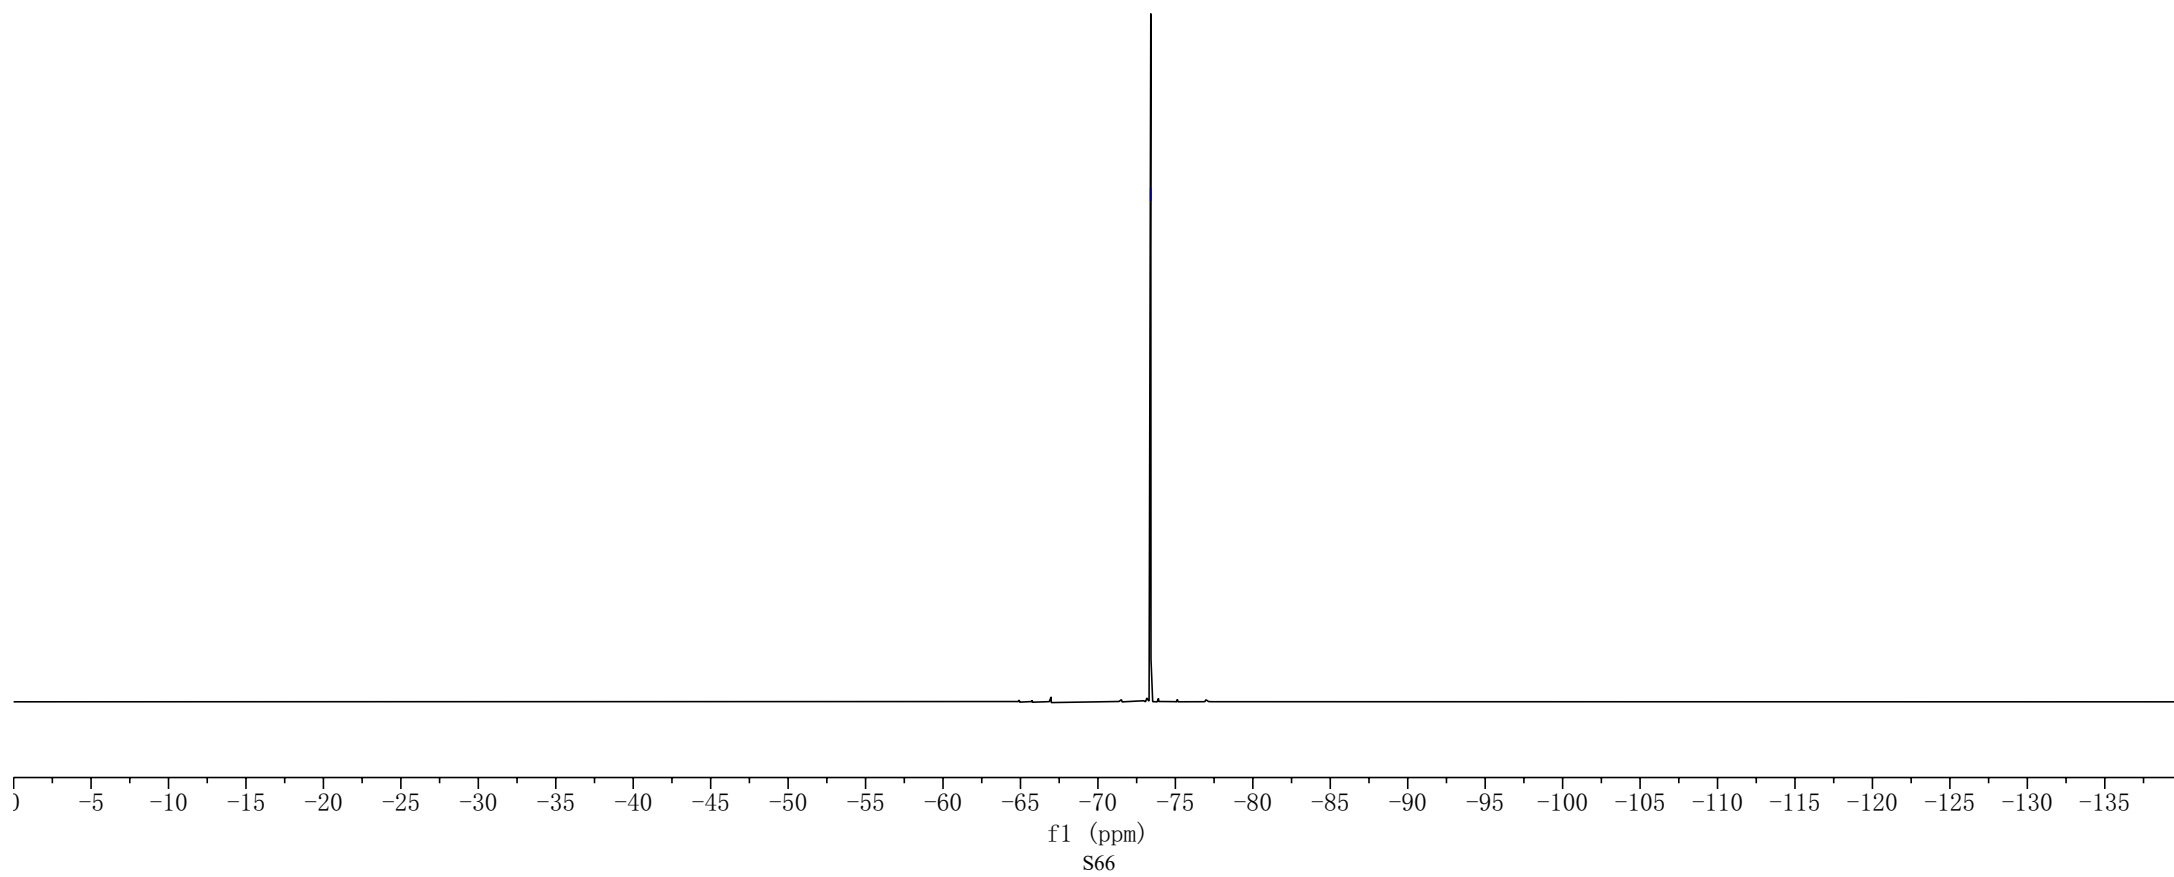

7.84  
7.82  
7.75  
7.73  
7.72  
7.71  
7.53  
7.51  
7.49  
7.33  
7.32  
7.31  
7.30  
7.29  
7.11  
7.09  
7.07  
6.41  
6.39  
6.37  
6.11

3.37

1.45

-0.00

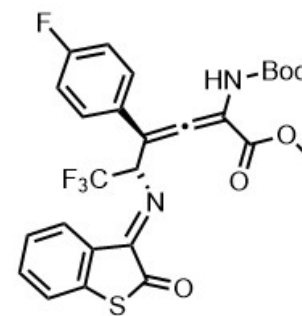

3ja

<sup>1</sup>H NMR (400 MHz, CDCl<sub>3</sub>)

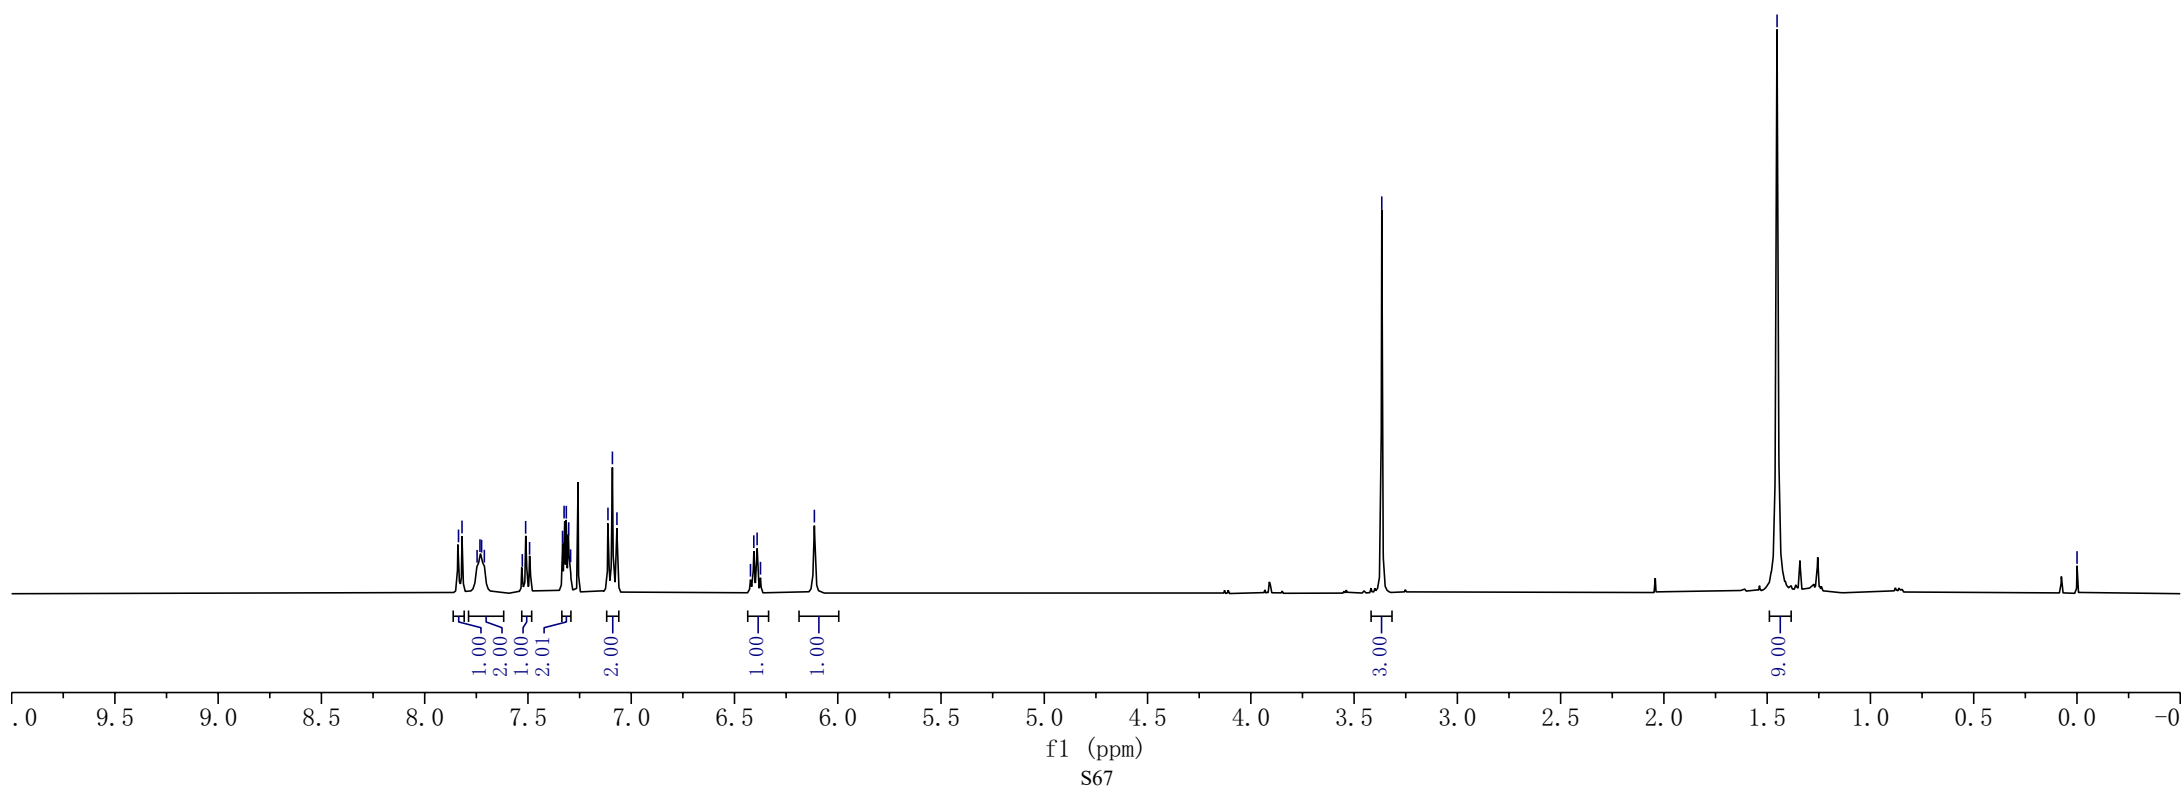

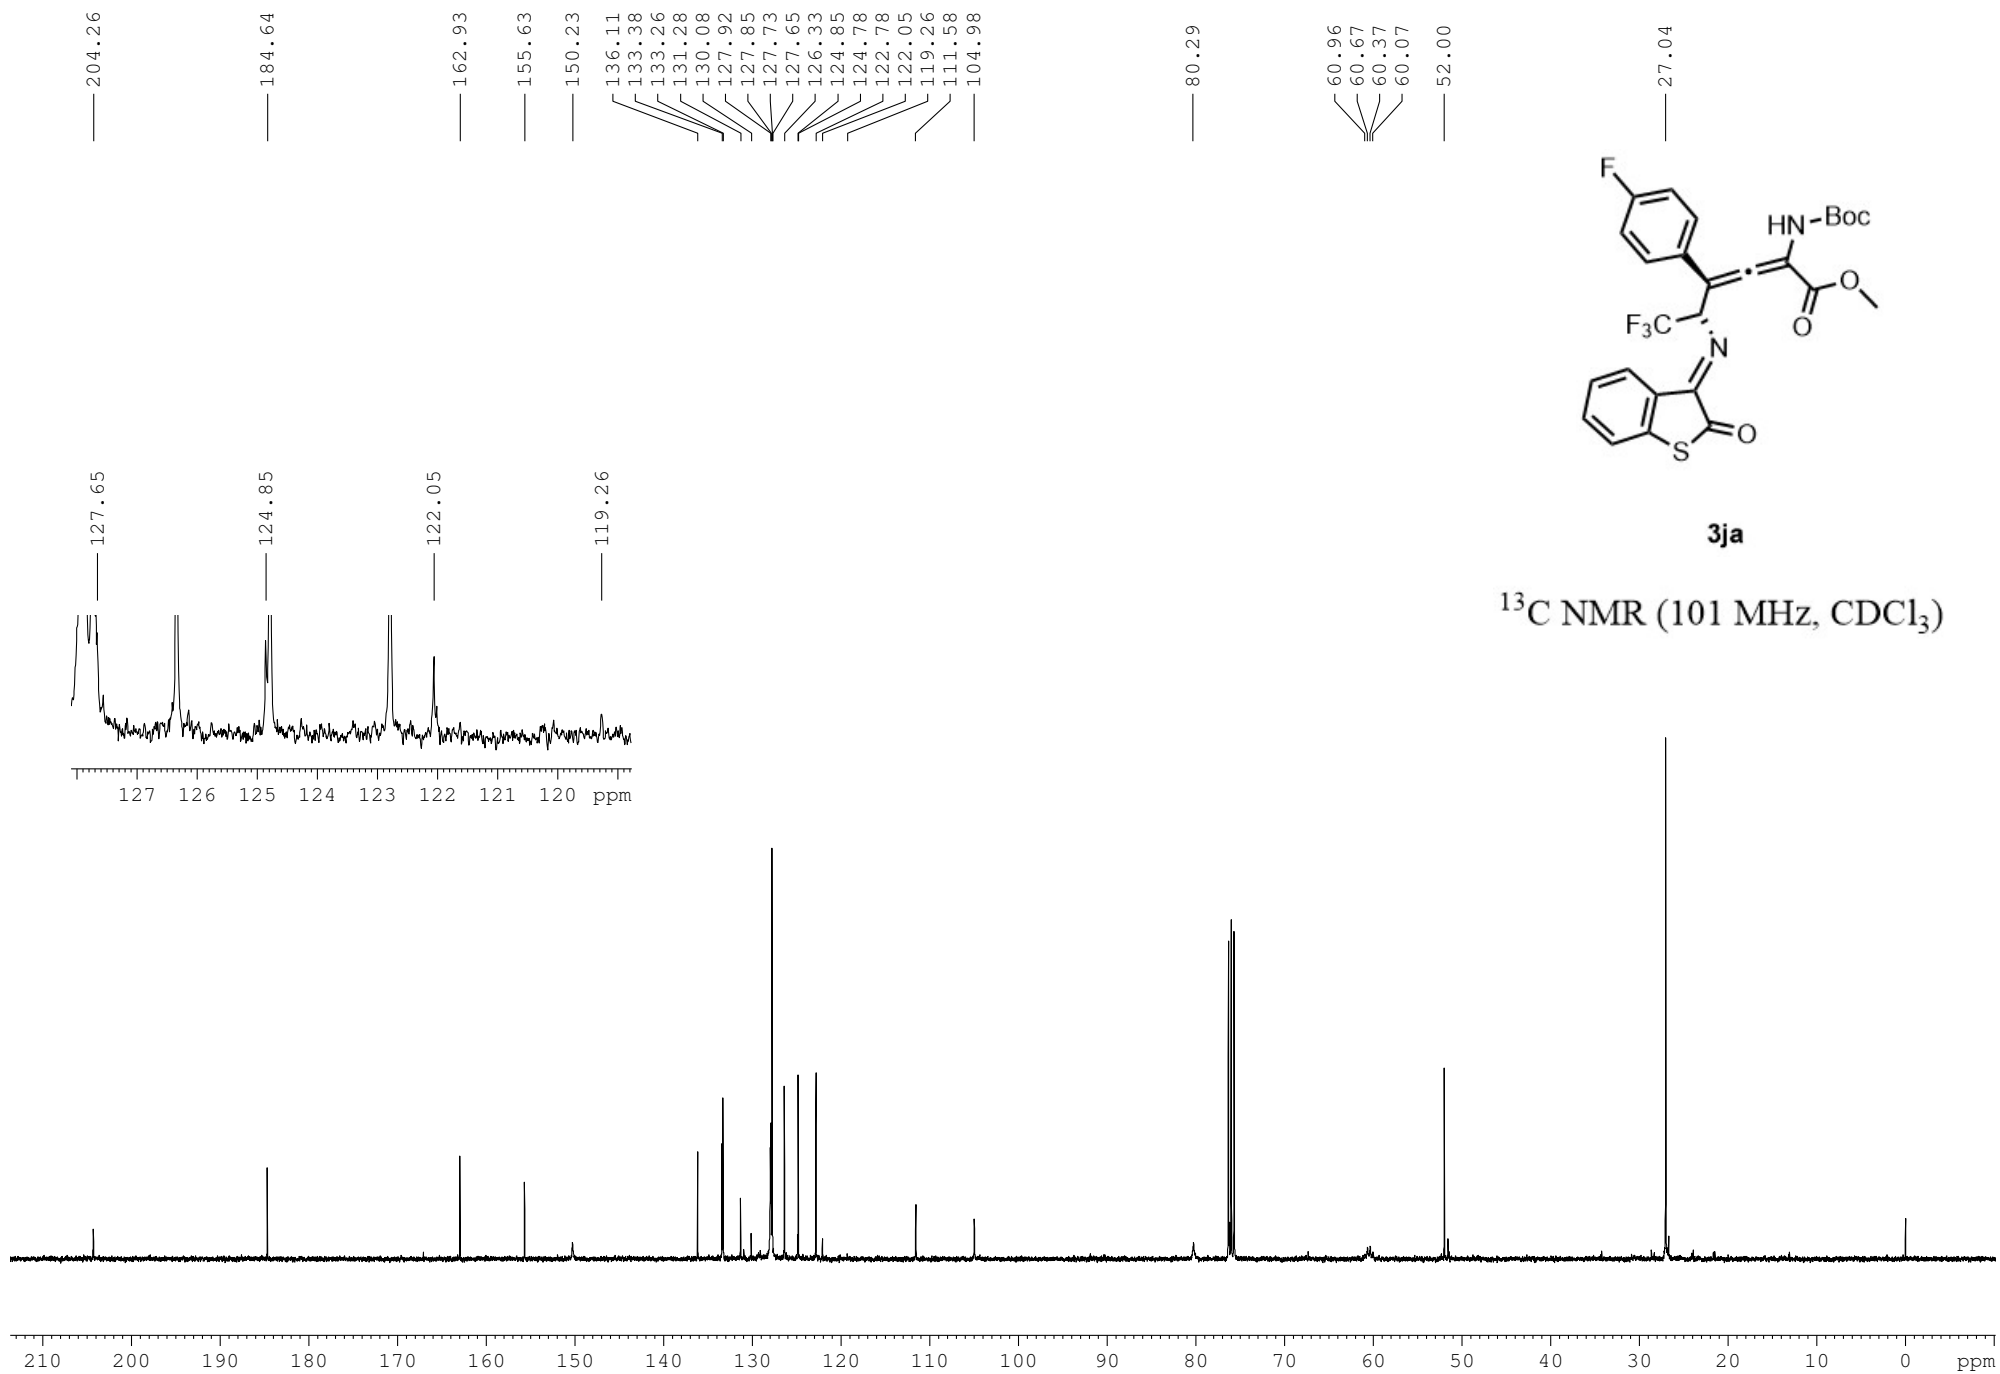

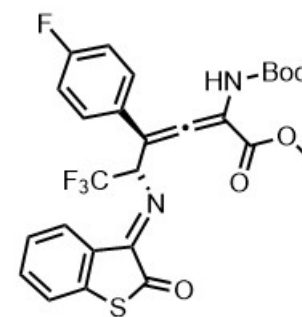

**3ja**

$^{19}\text{F}$  NMR (376 MHz,  $\text{CDCl}_3$ )

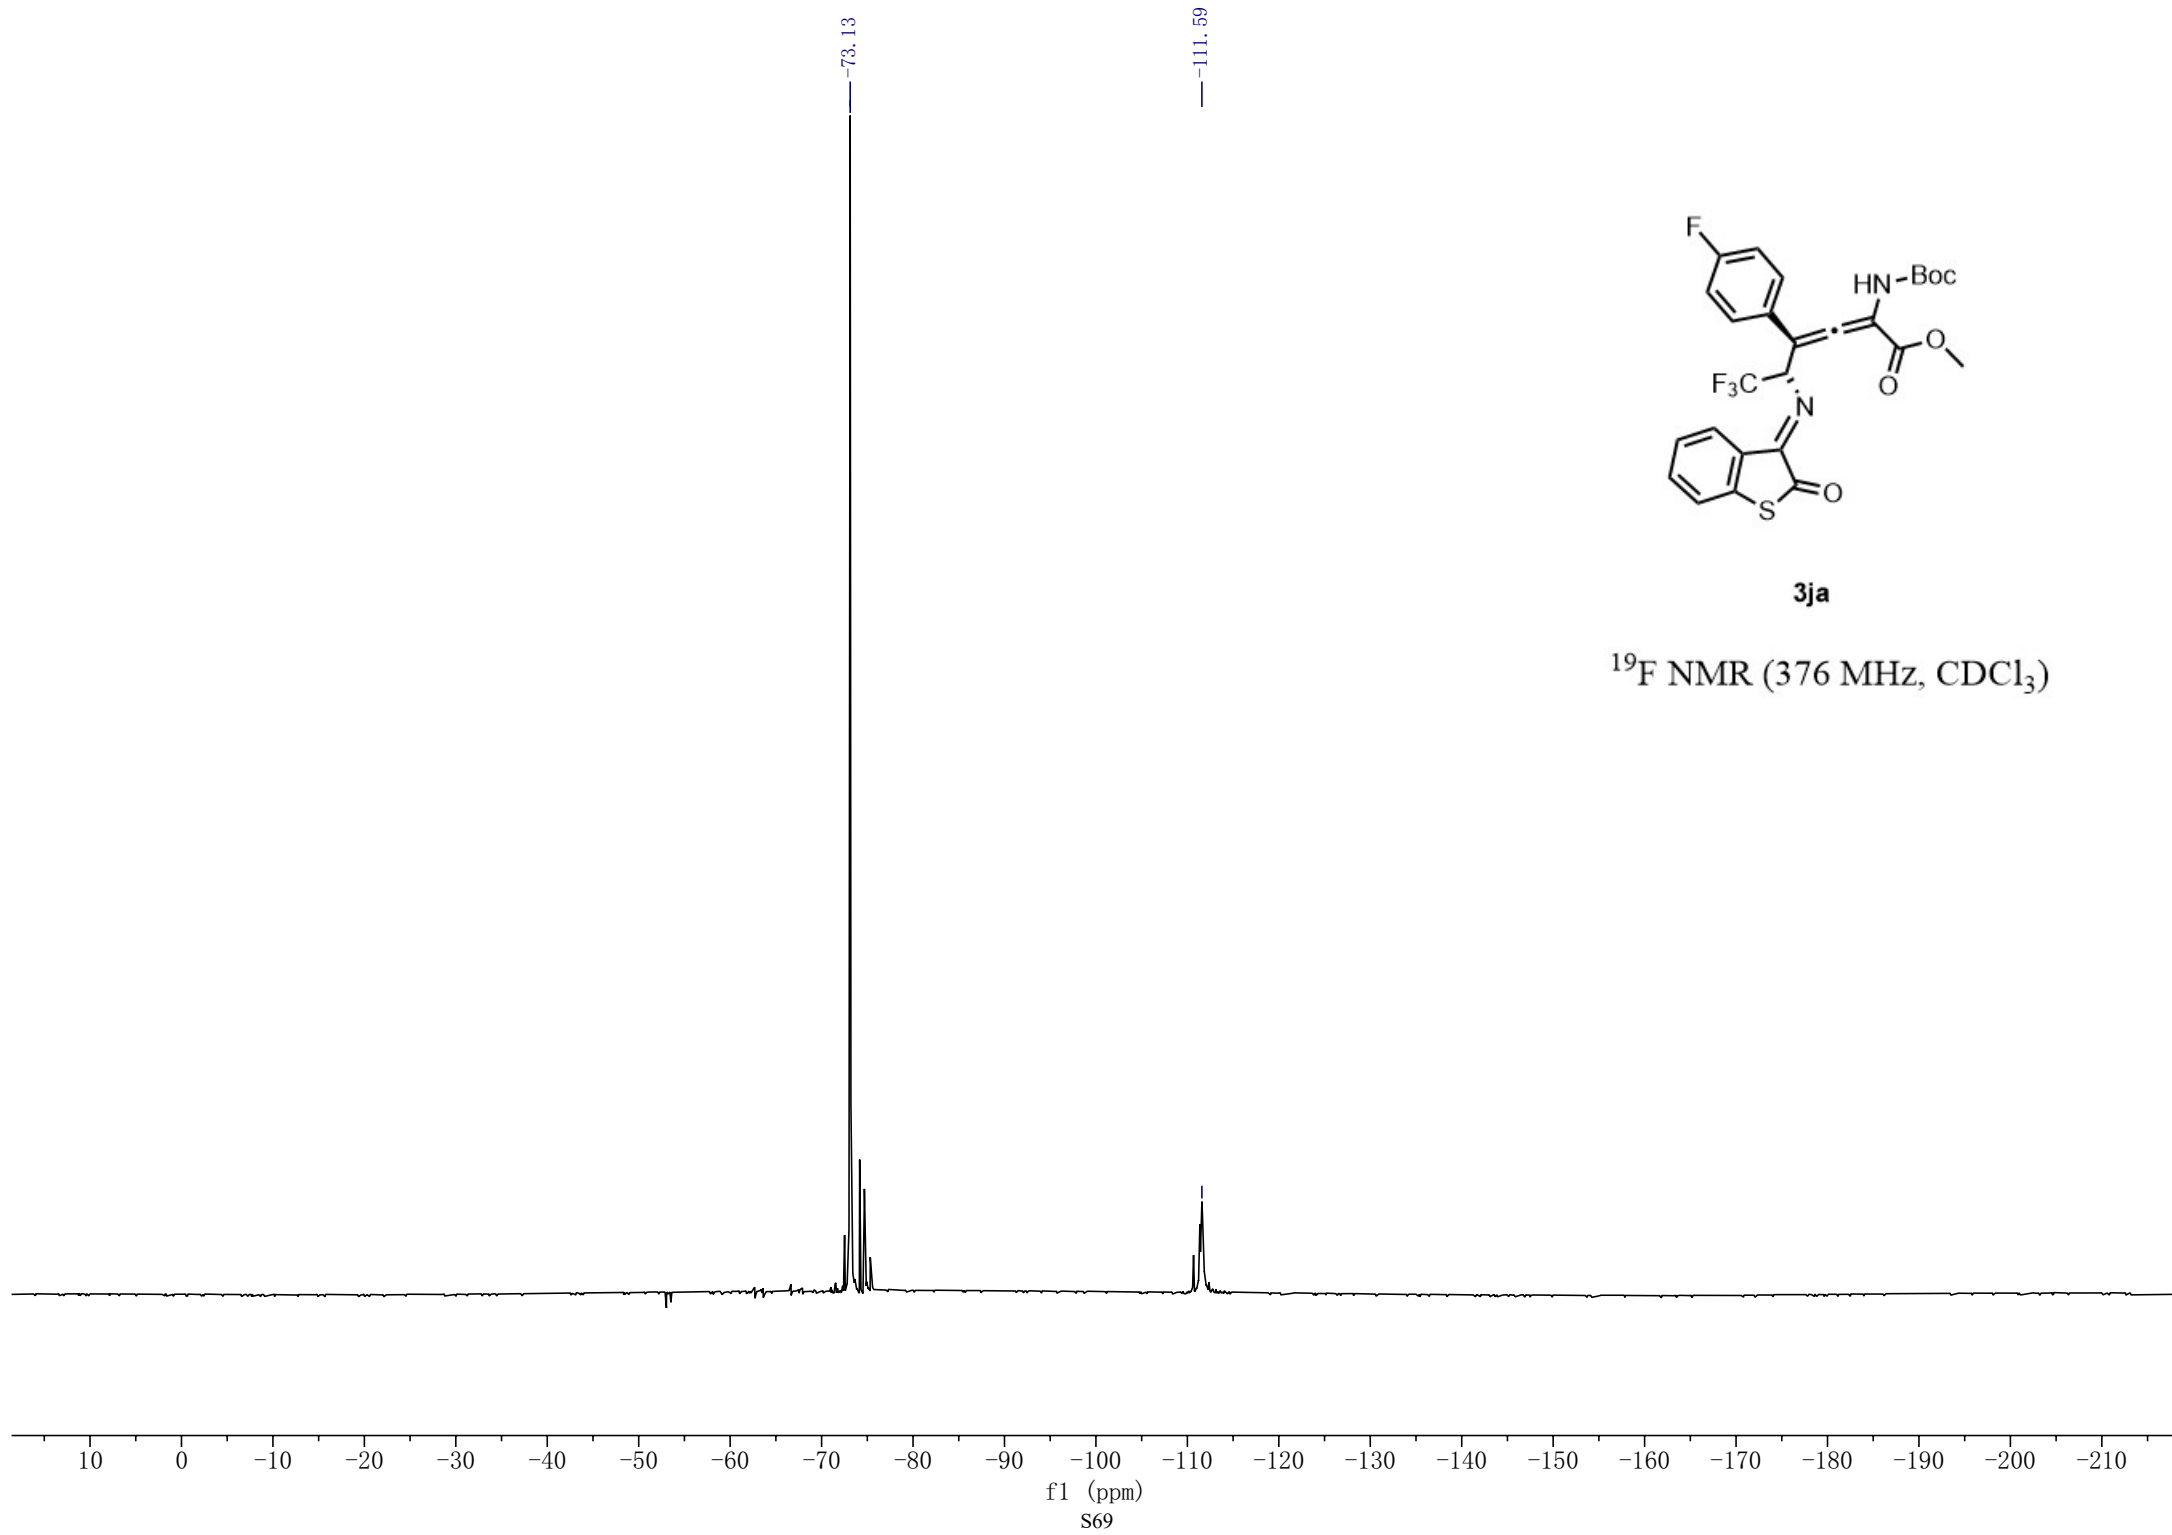

7.84  
7.82  
7.68  
7.66  
7.53  
7.51  
7.50  
7.49  
7.38  
7.36  
7.34  
7.33  
7.32  
7.31  
7.30

6.41  
6.40  
6.38  
6.37  
6.11

3.36

1.45

-0.00

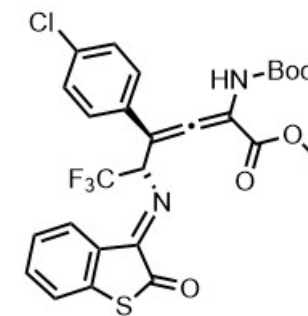

**3ka**

<sup>1</sup>H NMR (400 MHz, CDCl<sub>3</sub>)

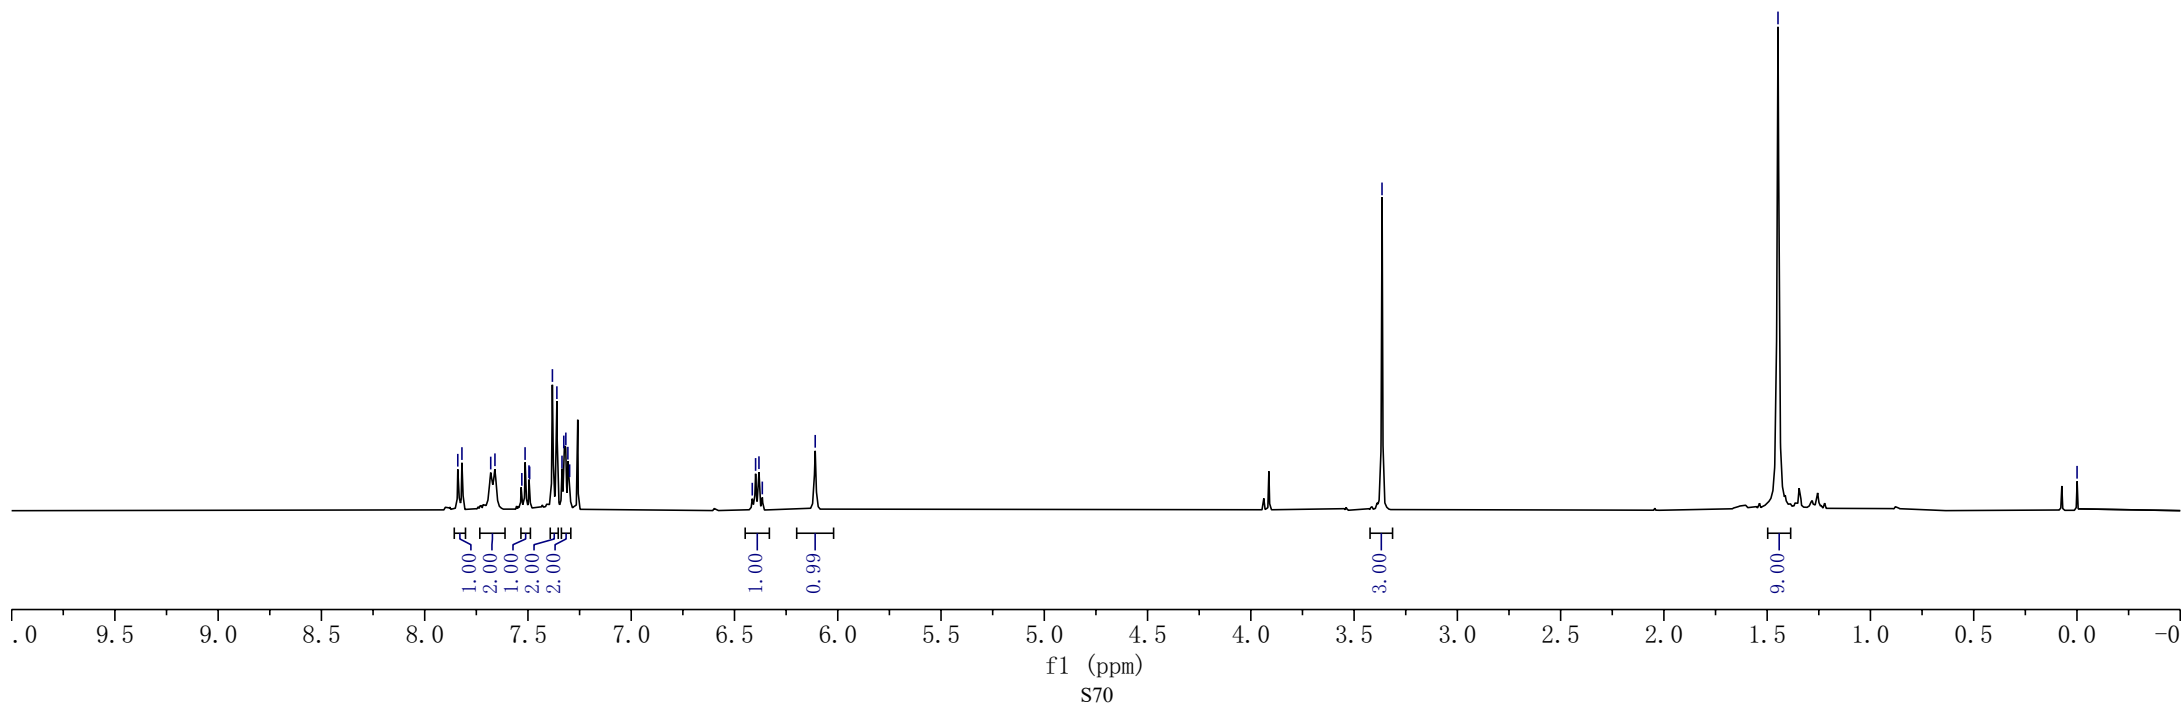

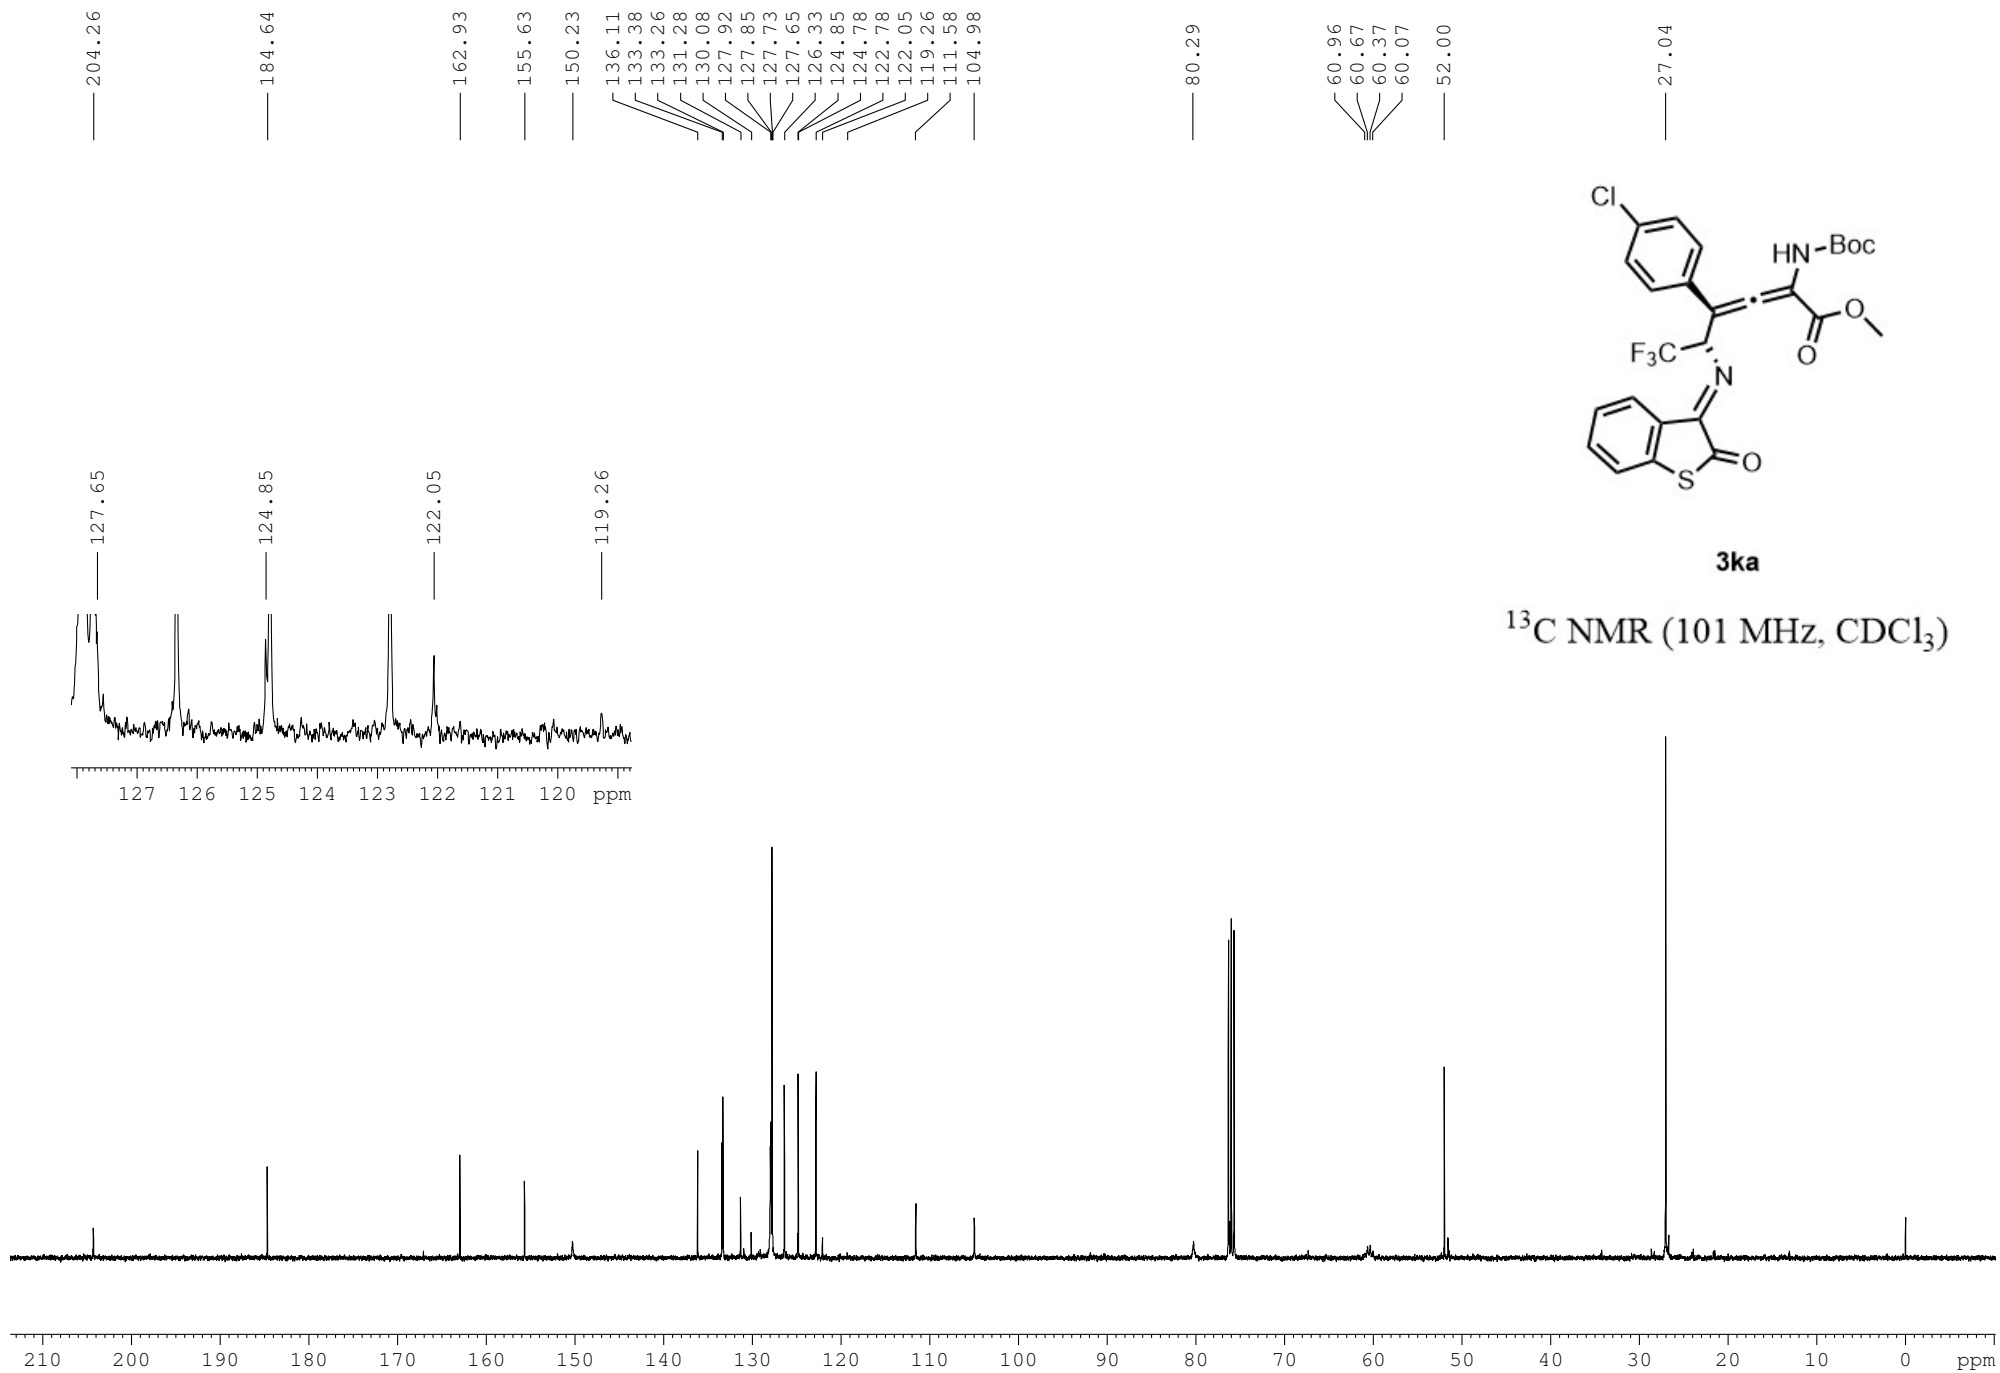

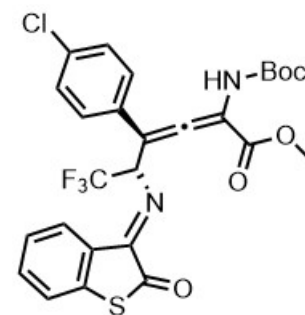

**3ka**

$^{19}\text{F}$  NMR (376 MHz,  $\text{CDCl}_3$ )

—73.44

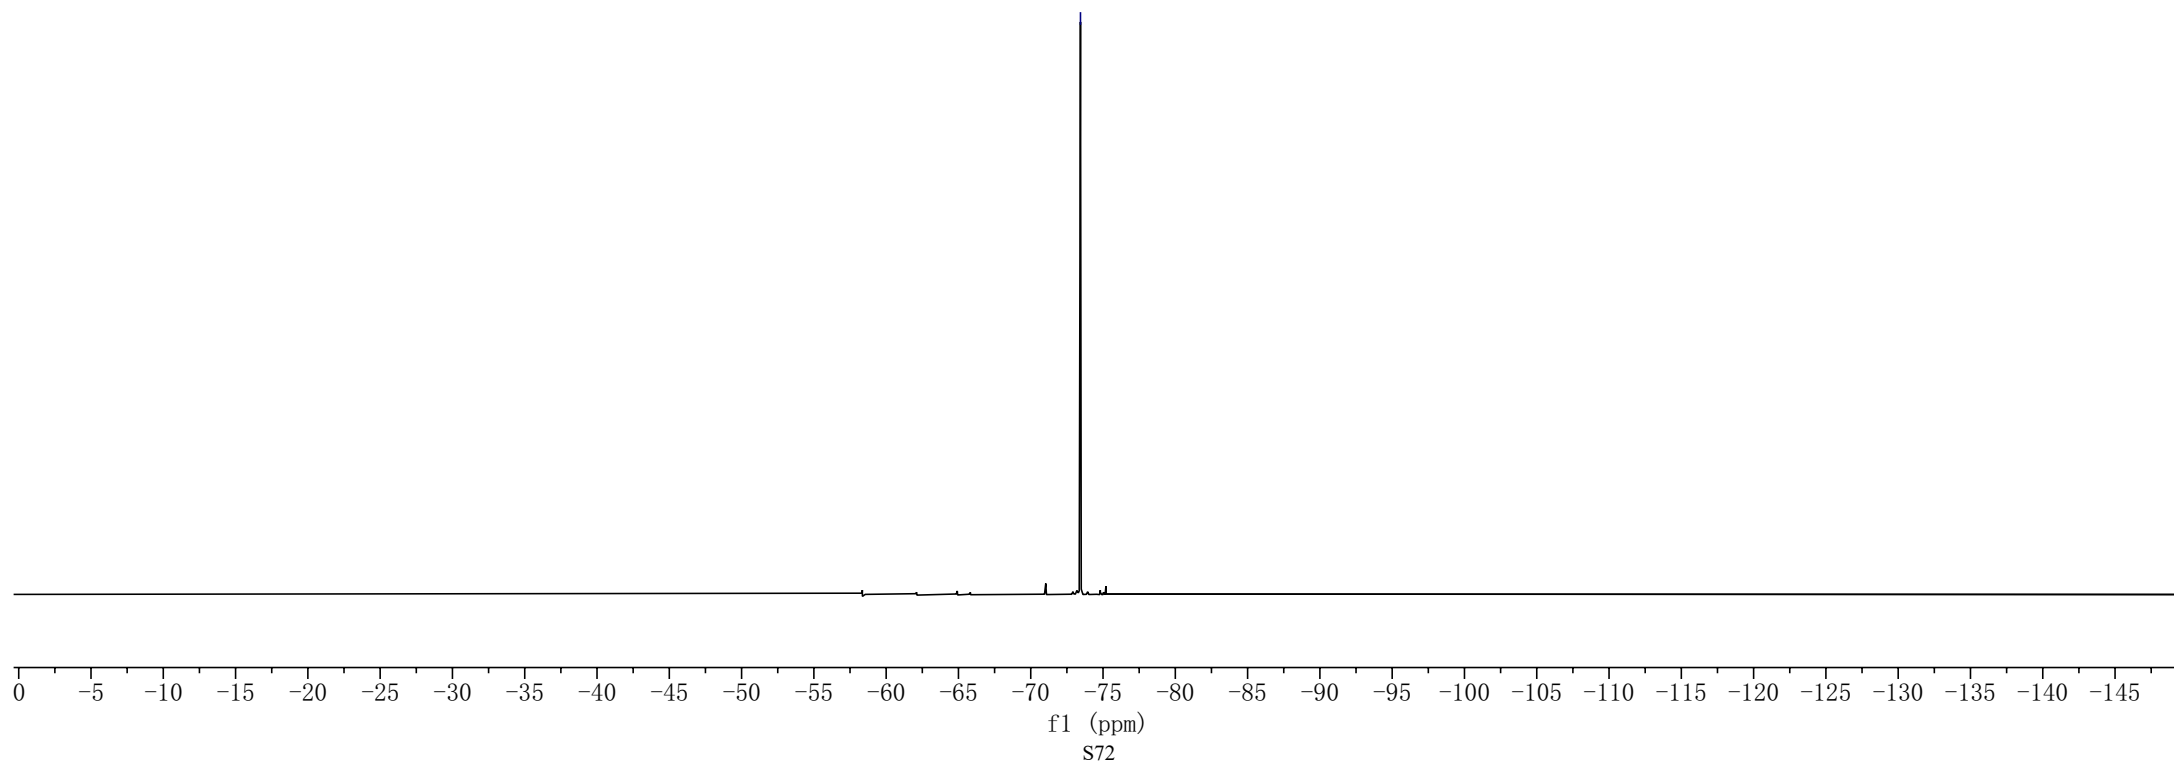



7.84  
7.83  
7.81  
7.62  
7.60  
7.53  
7.52  
7.51  
7.49  
7.33  
7.32  
7.31  
7.30  
7.29

6.41  
6.39  
6.38  
6.36  
6.11

3.36

1.45

-0.00

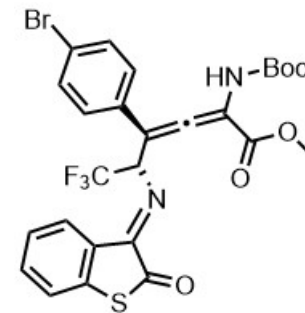

3la

$^1\text{H}$  NMR (400 MHz,  $\text{CDCl}_3$ )

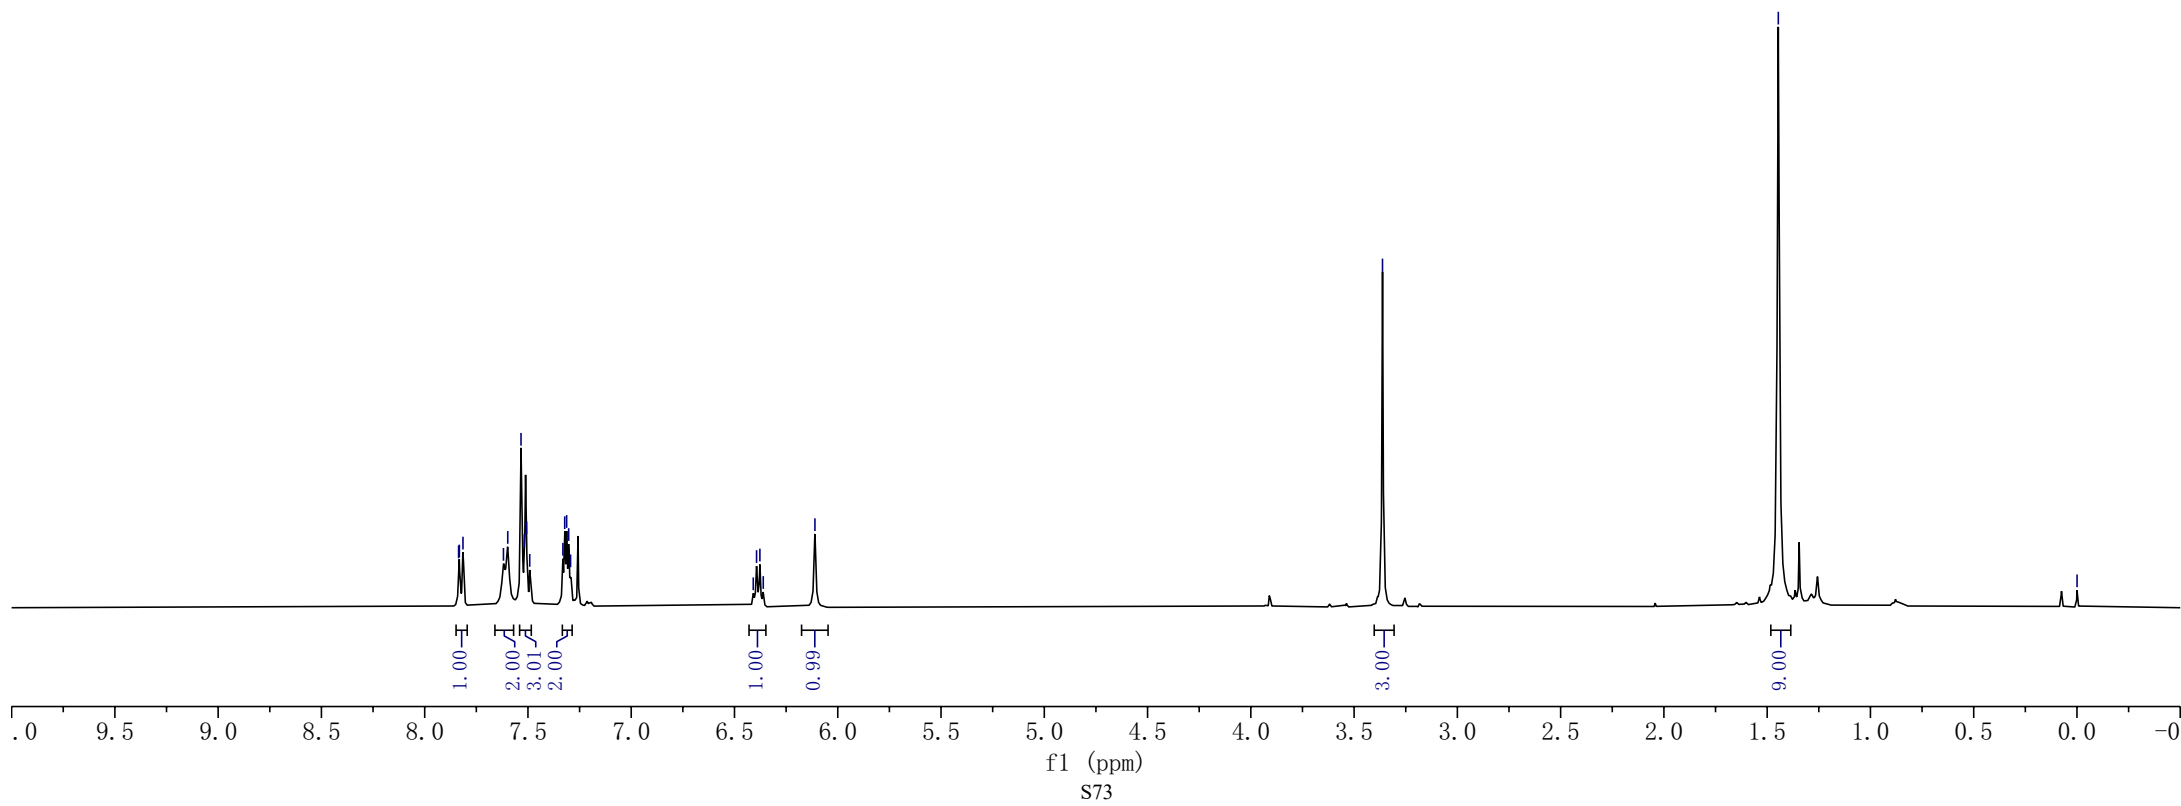

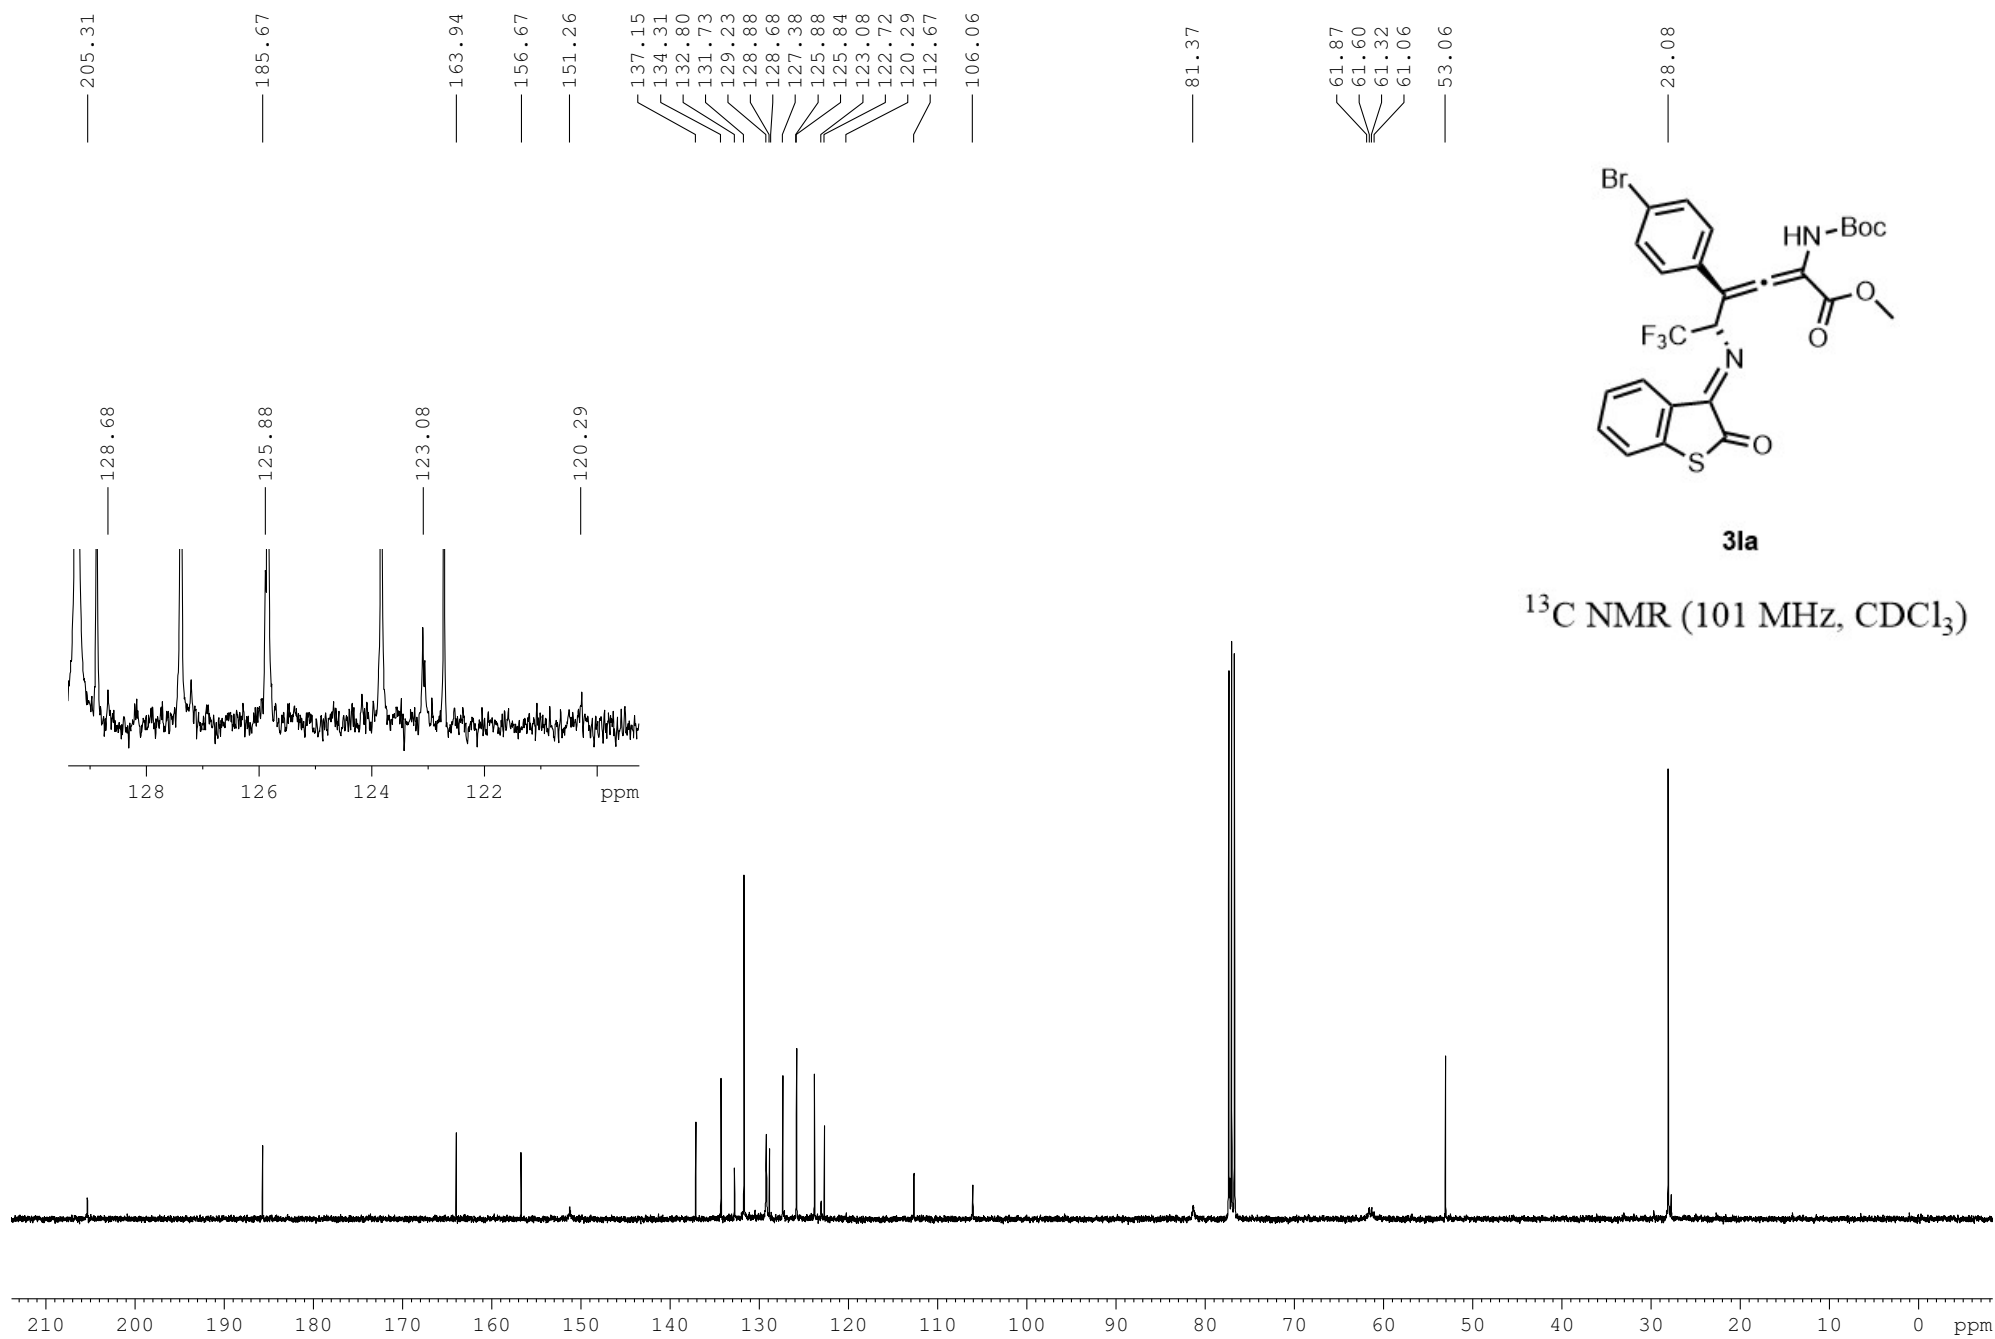

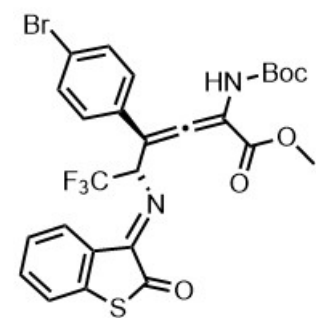

3la

<sup>19</sup>F NMR (376 MHz, CDCl<sub>3</sub>)

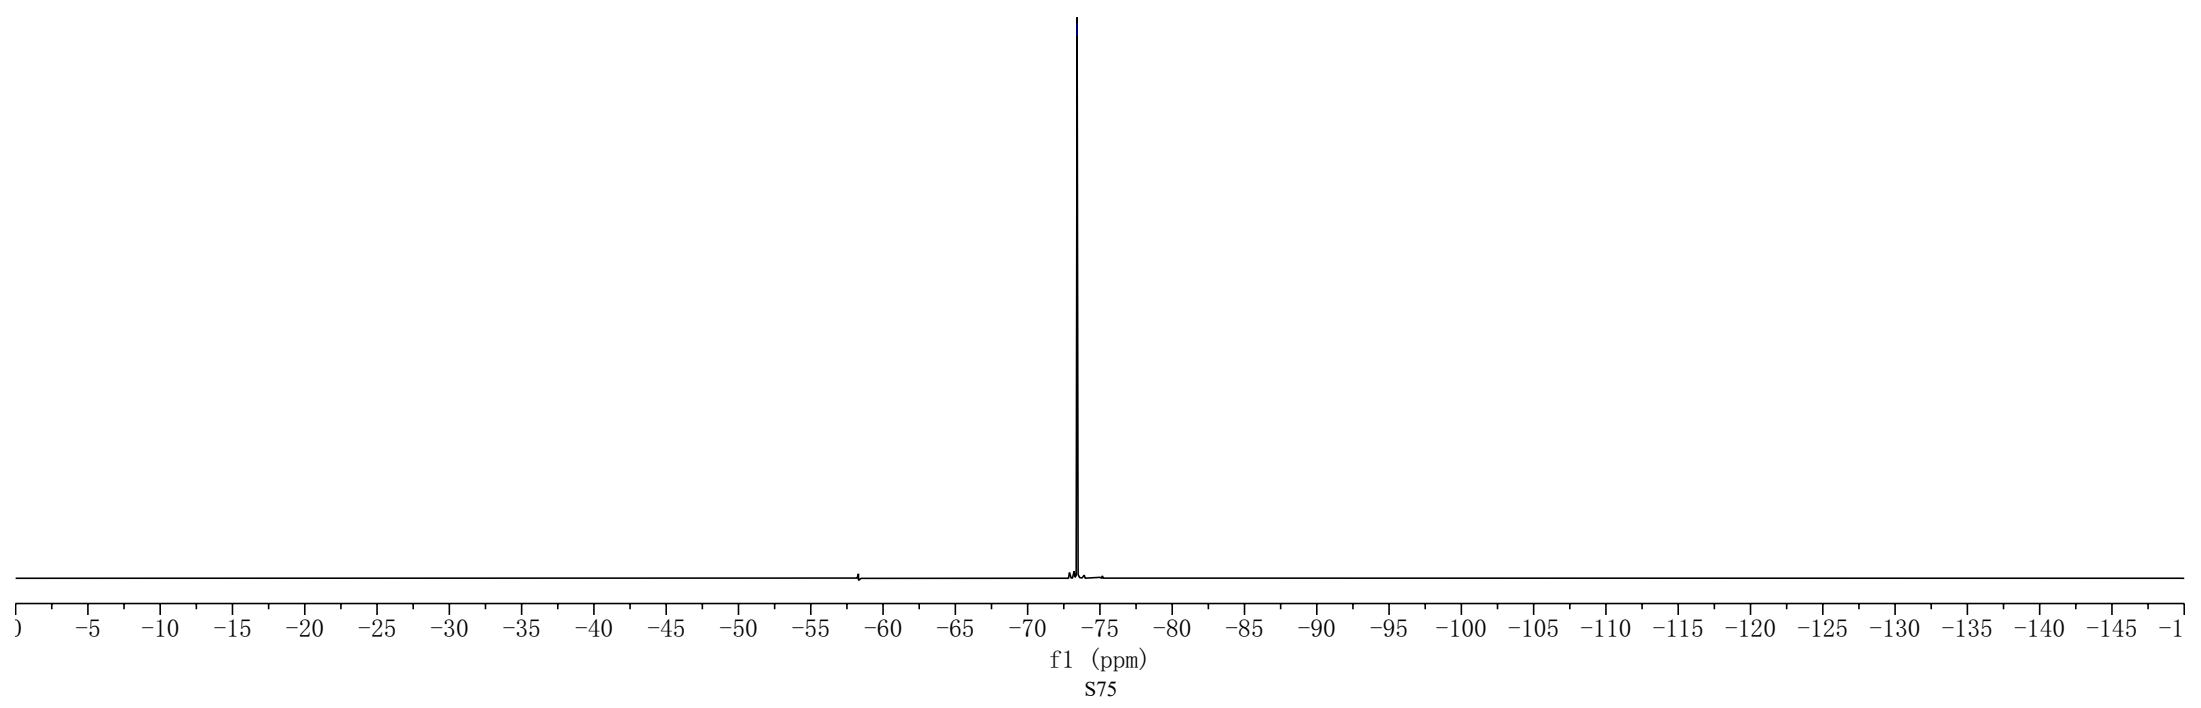

-73.42

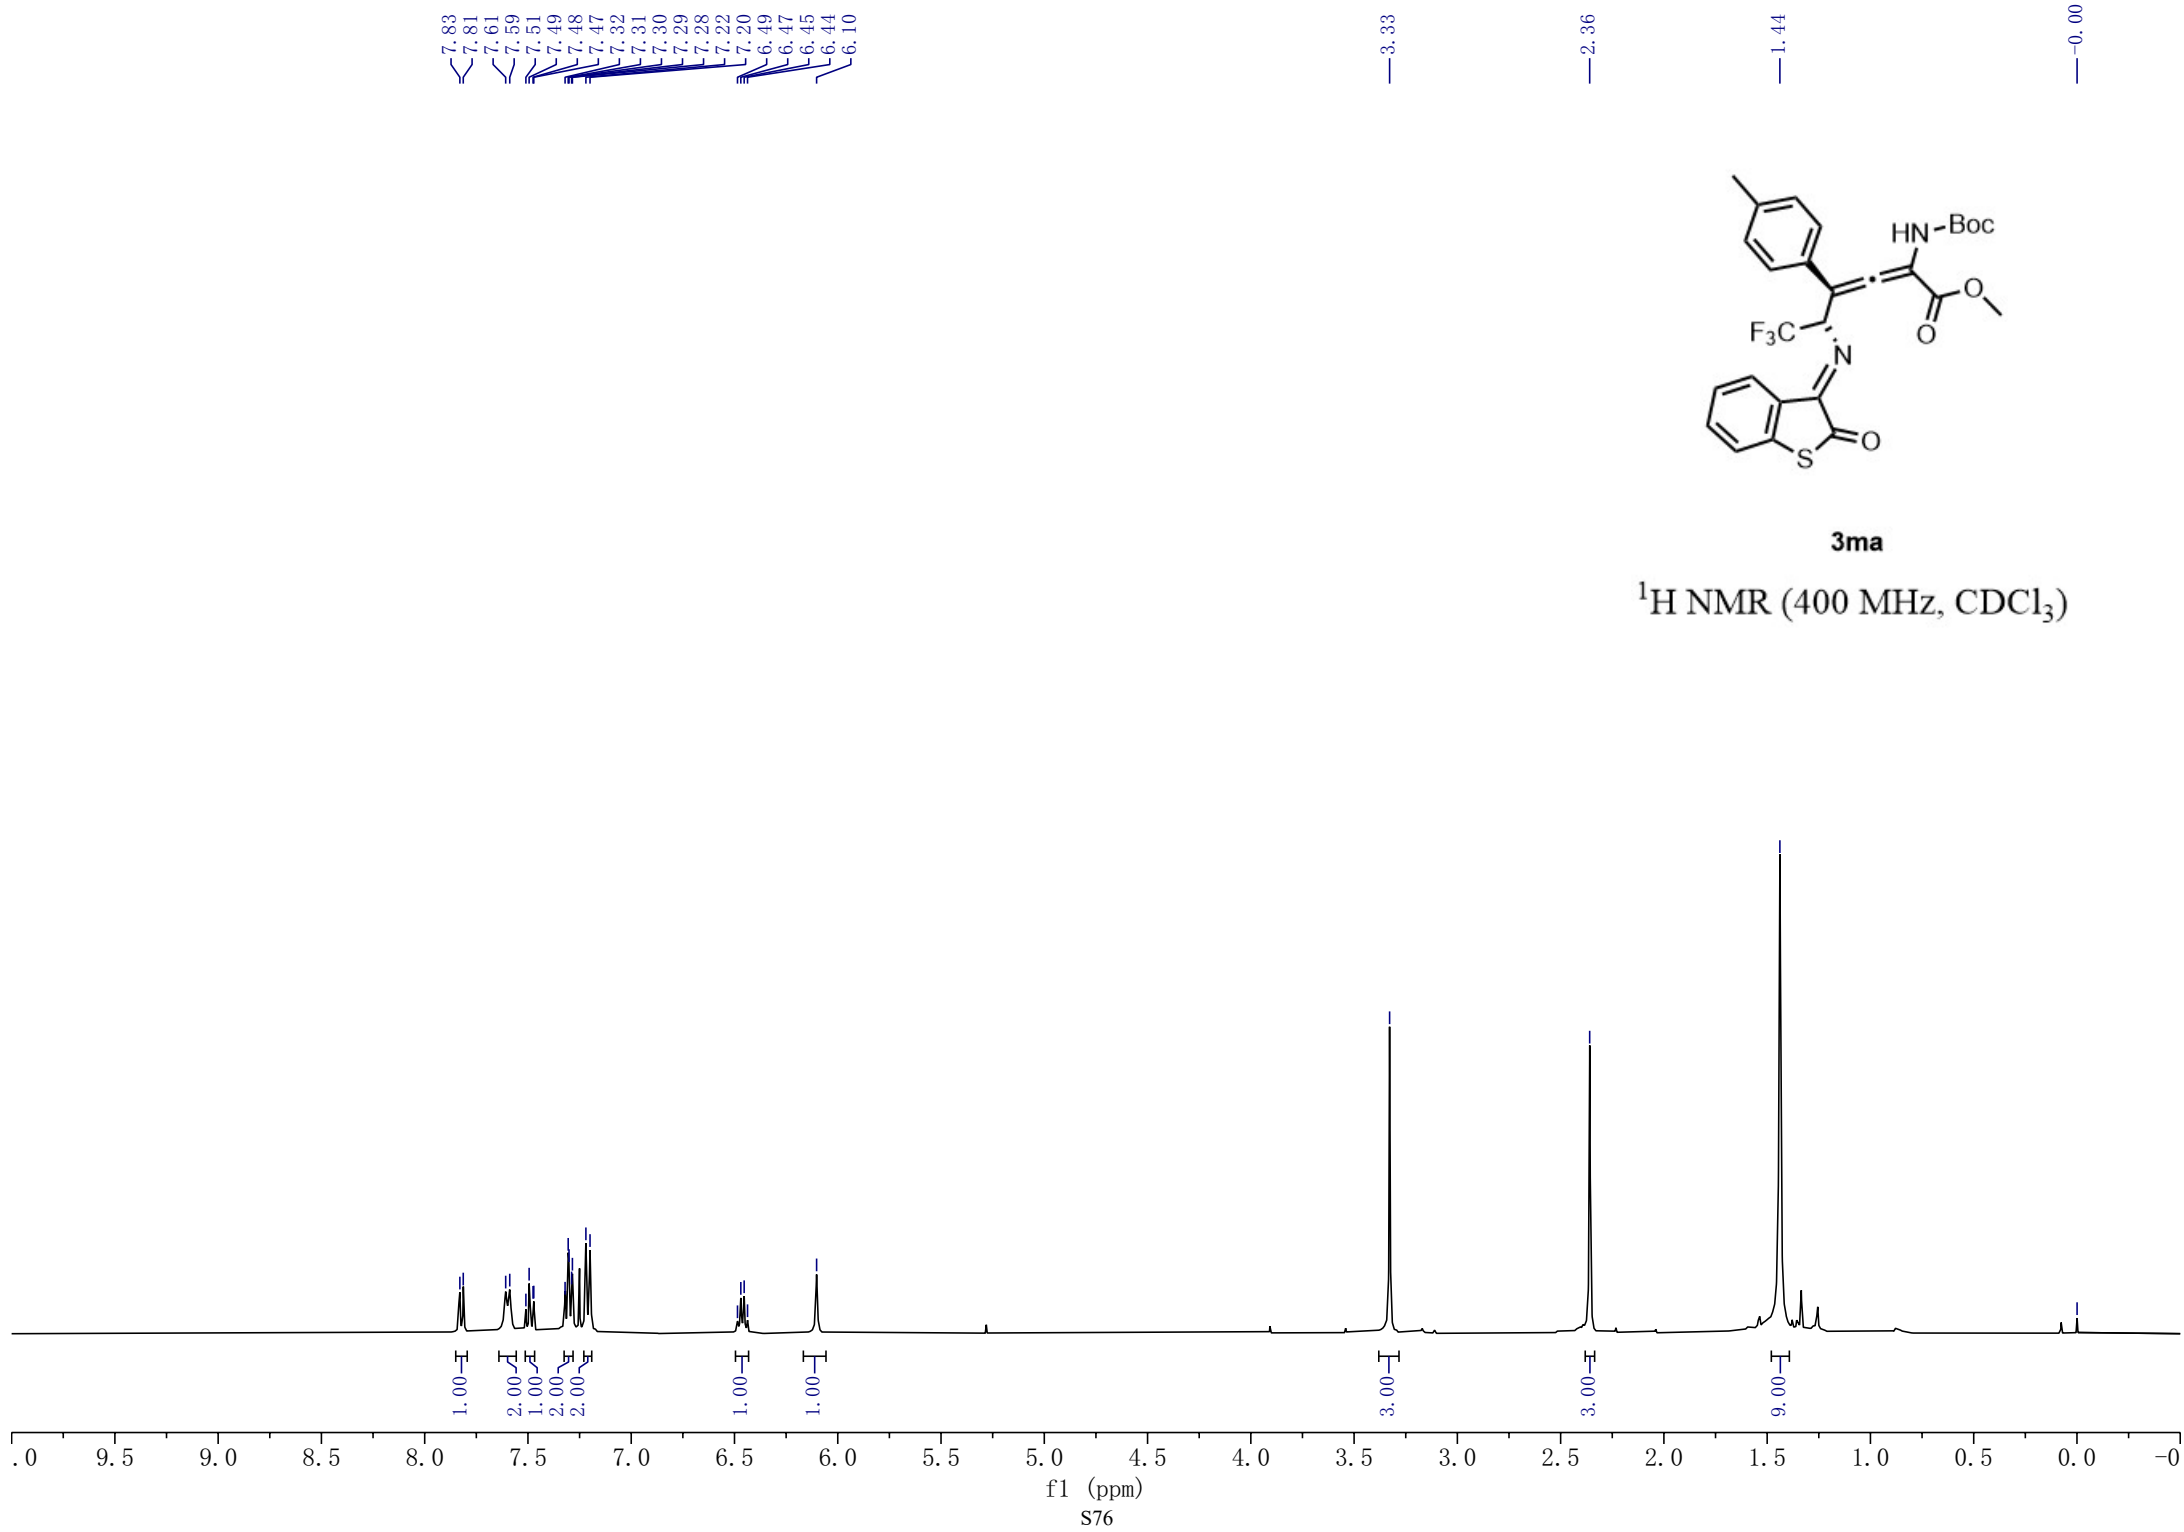

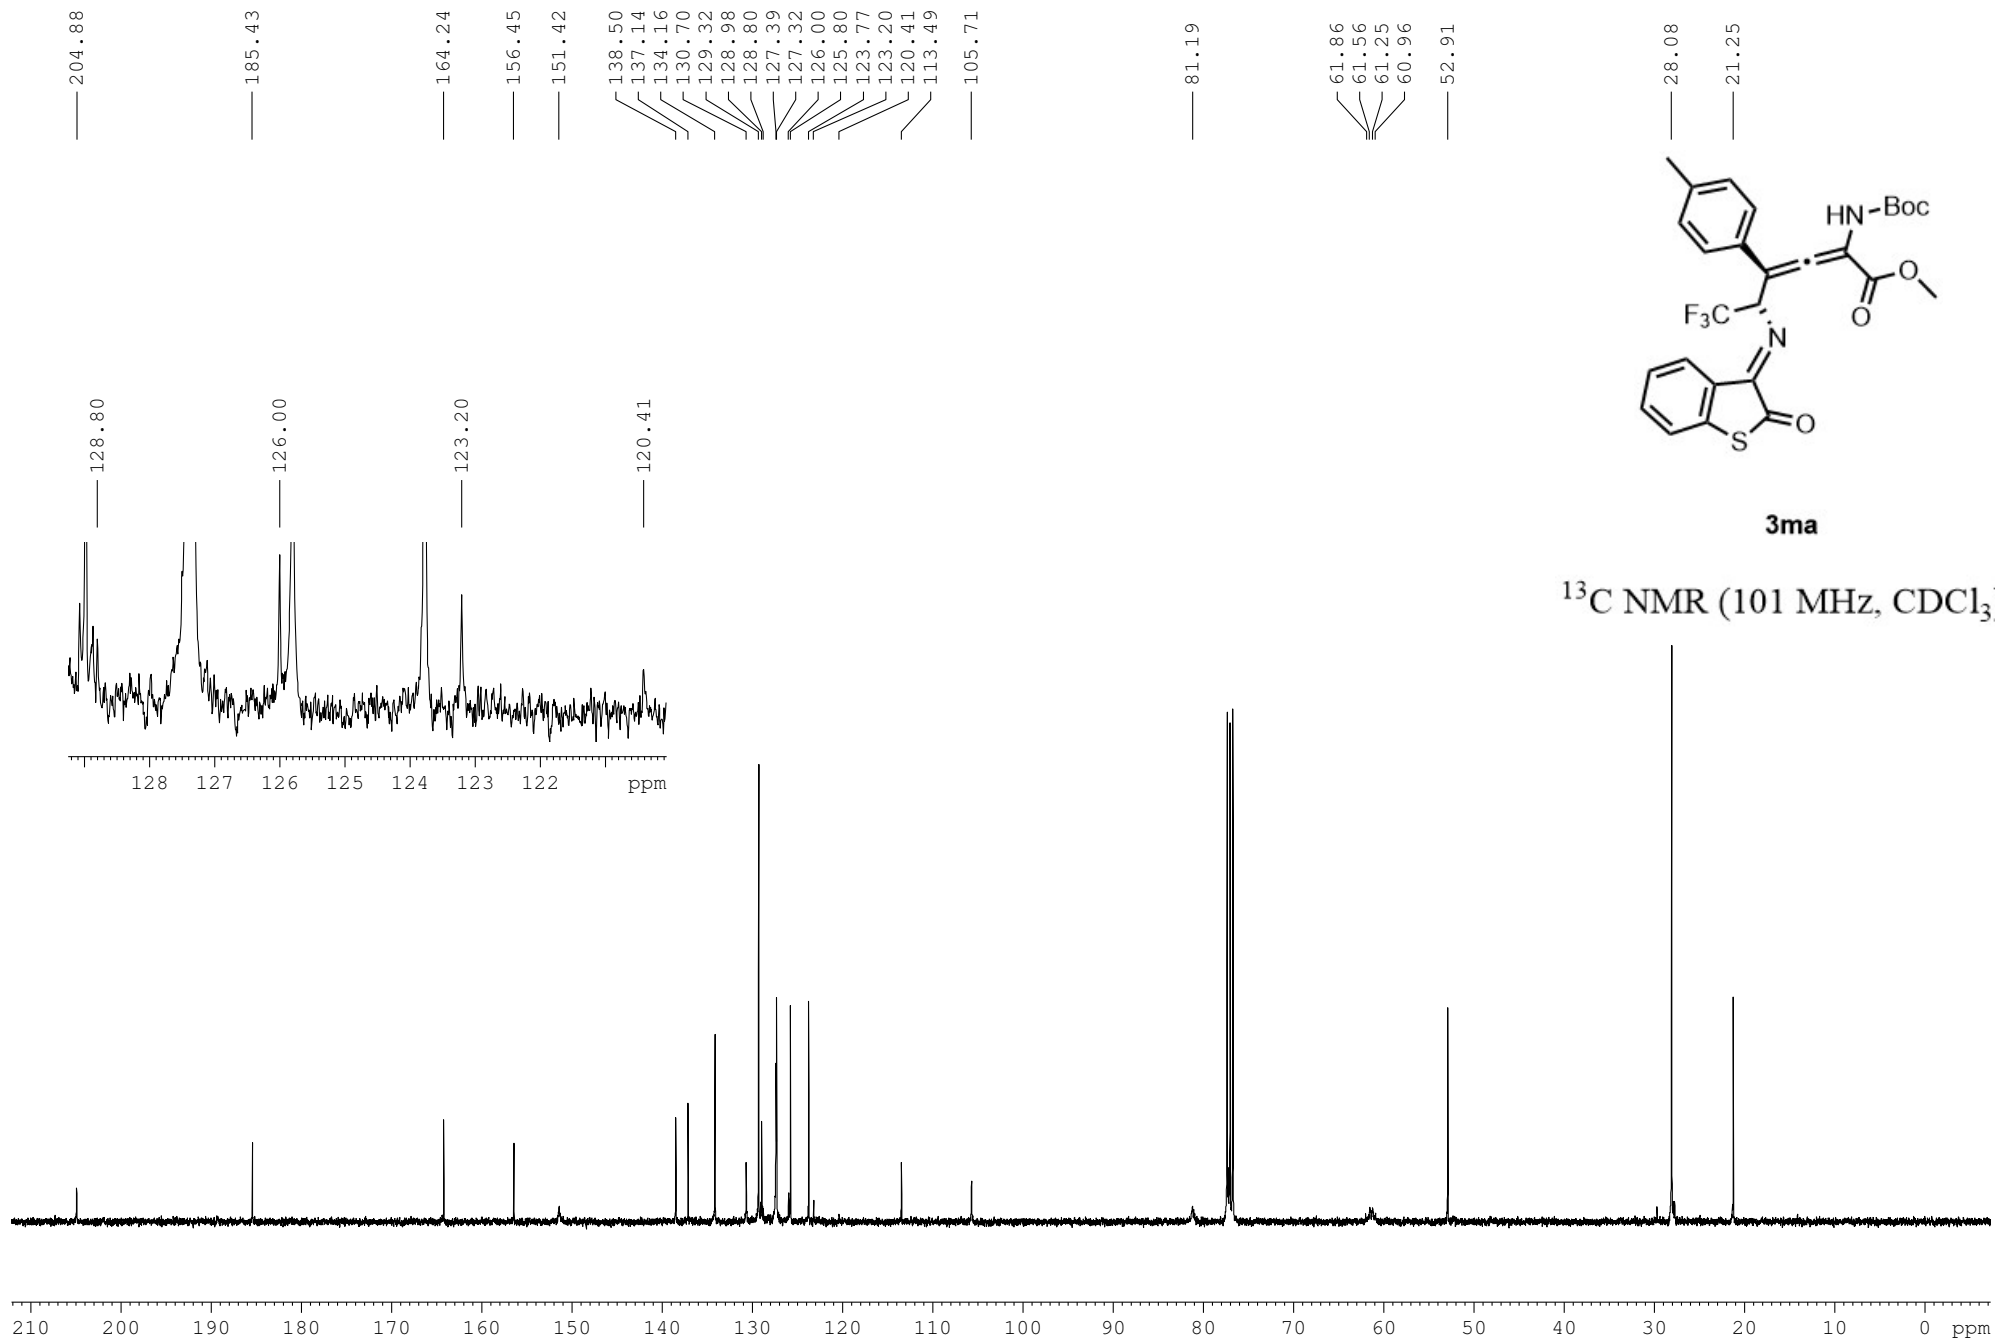

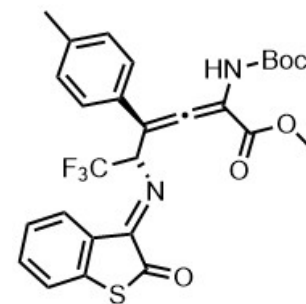

**3ma**

$^{19}\text{F}$  NMR (376 MHz,  $\text{CDCl}_3$ )

—73.38

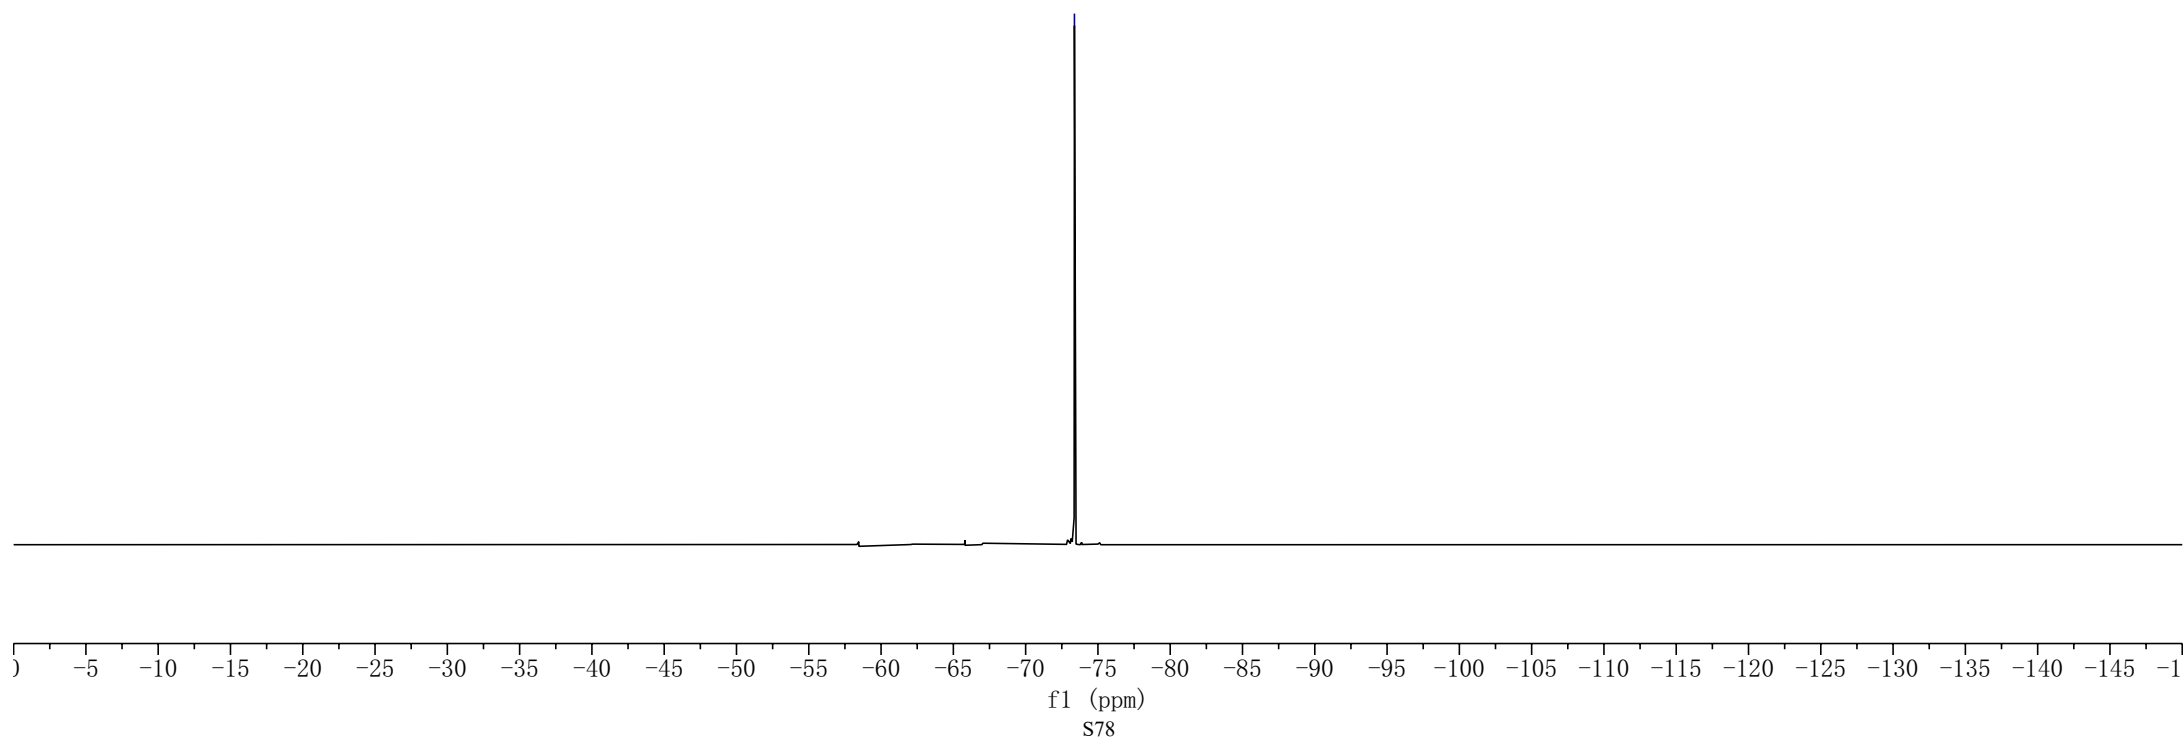

7.83  
7.81  
7.64  
7.62  
7.51  
7.49  
7.47  
7.32  
7.30  
7.29  
7.28  
7.25  
7.23  
6.50  
6.49  
6.47  
6.45  
6.11

3.33

2.69  
2.67  
2.65  
2.63

1.44  
1.26  
1.24  
1.22

-0.00

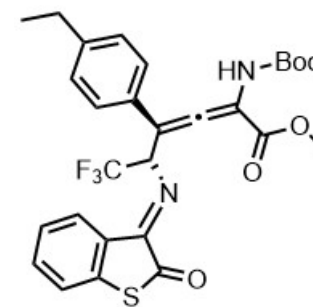

3na

<sup>1</sup>H NMR (400 MHz, CDCl<sub>3</sub>)

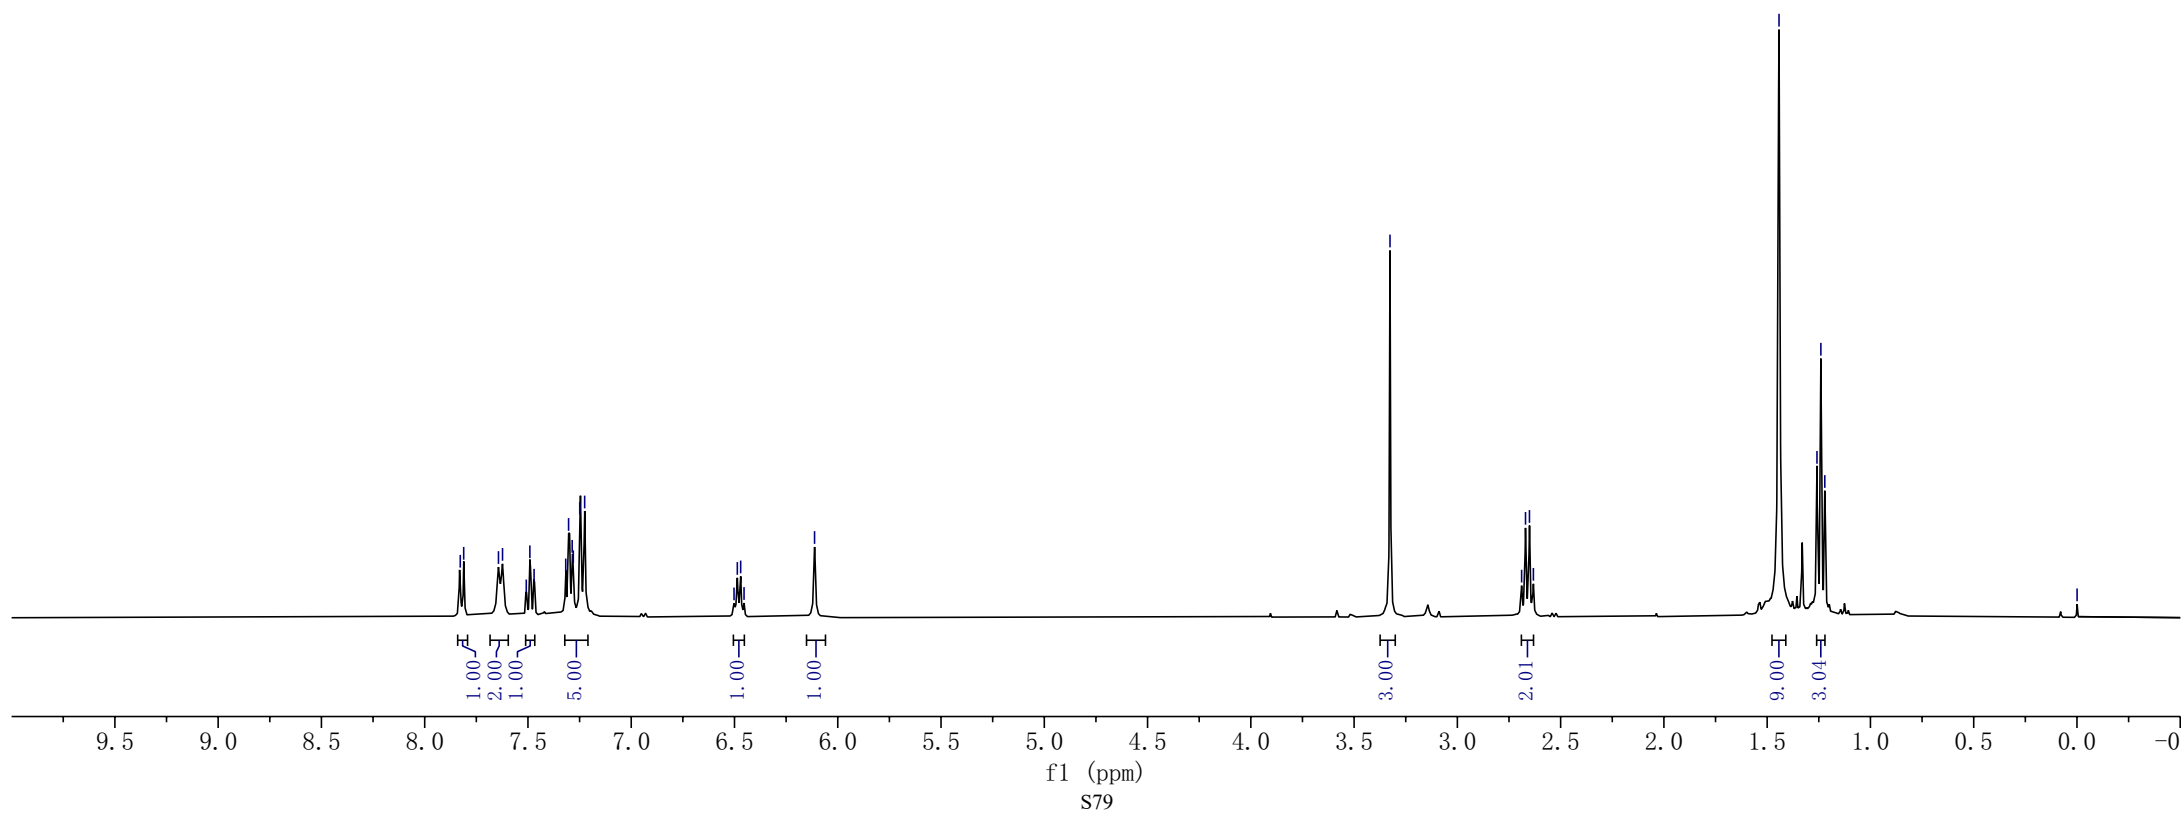

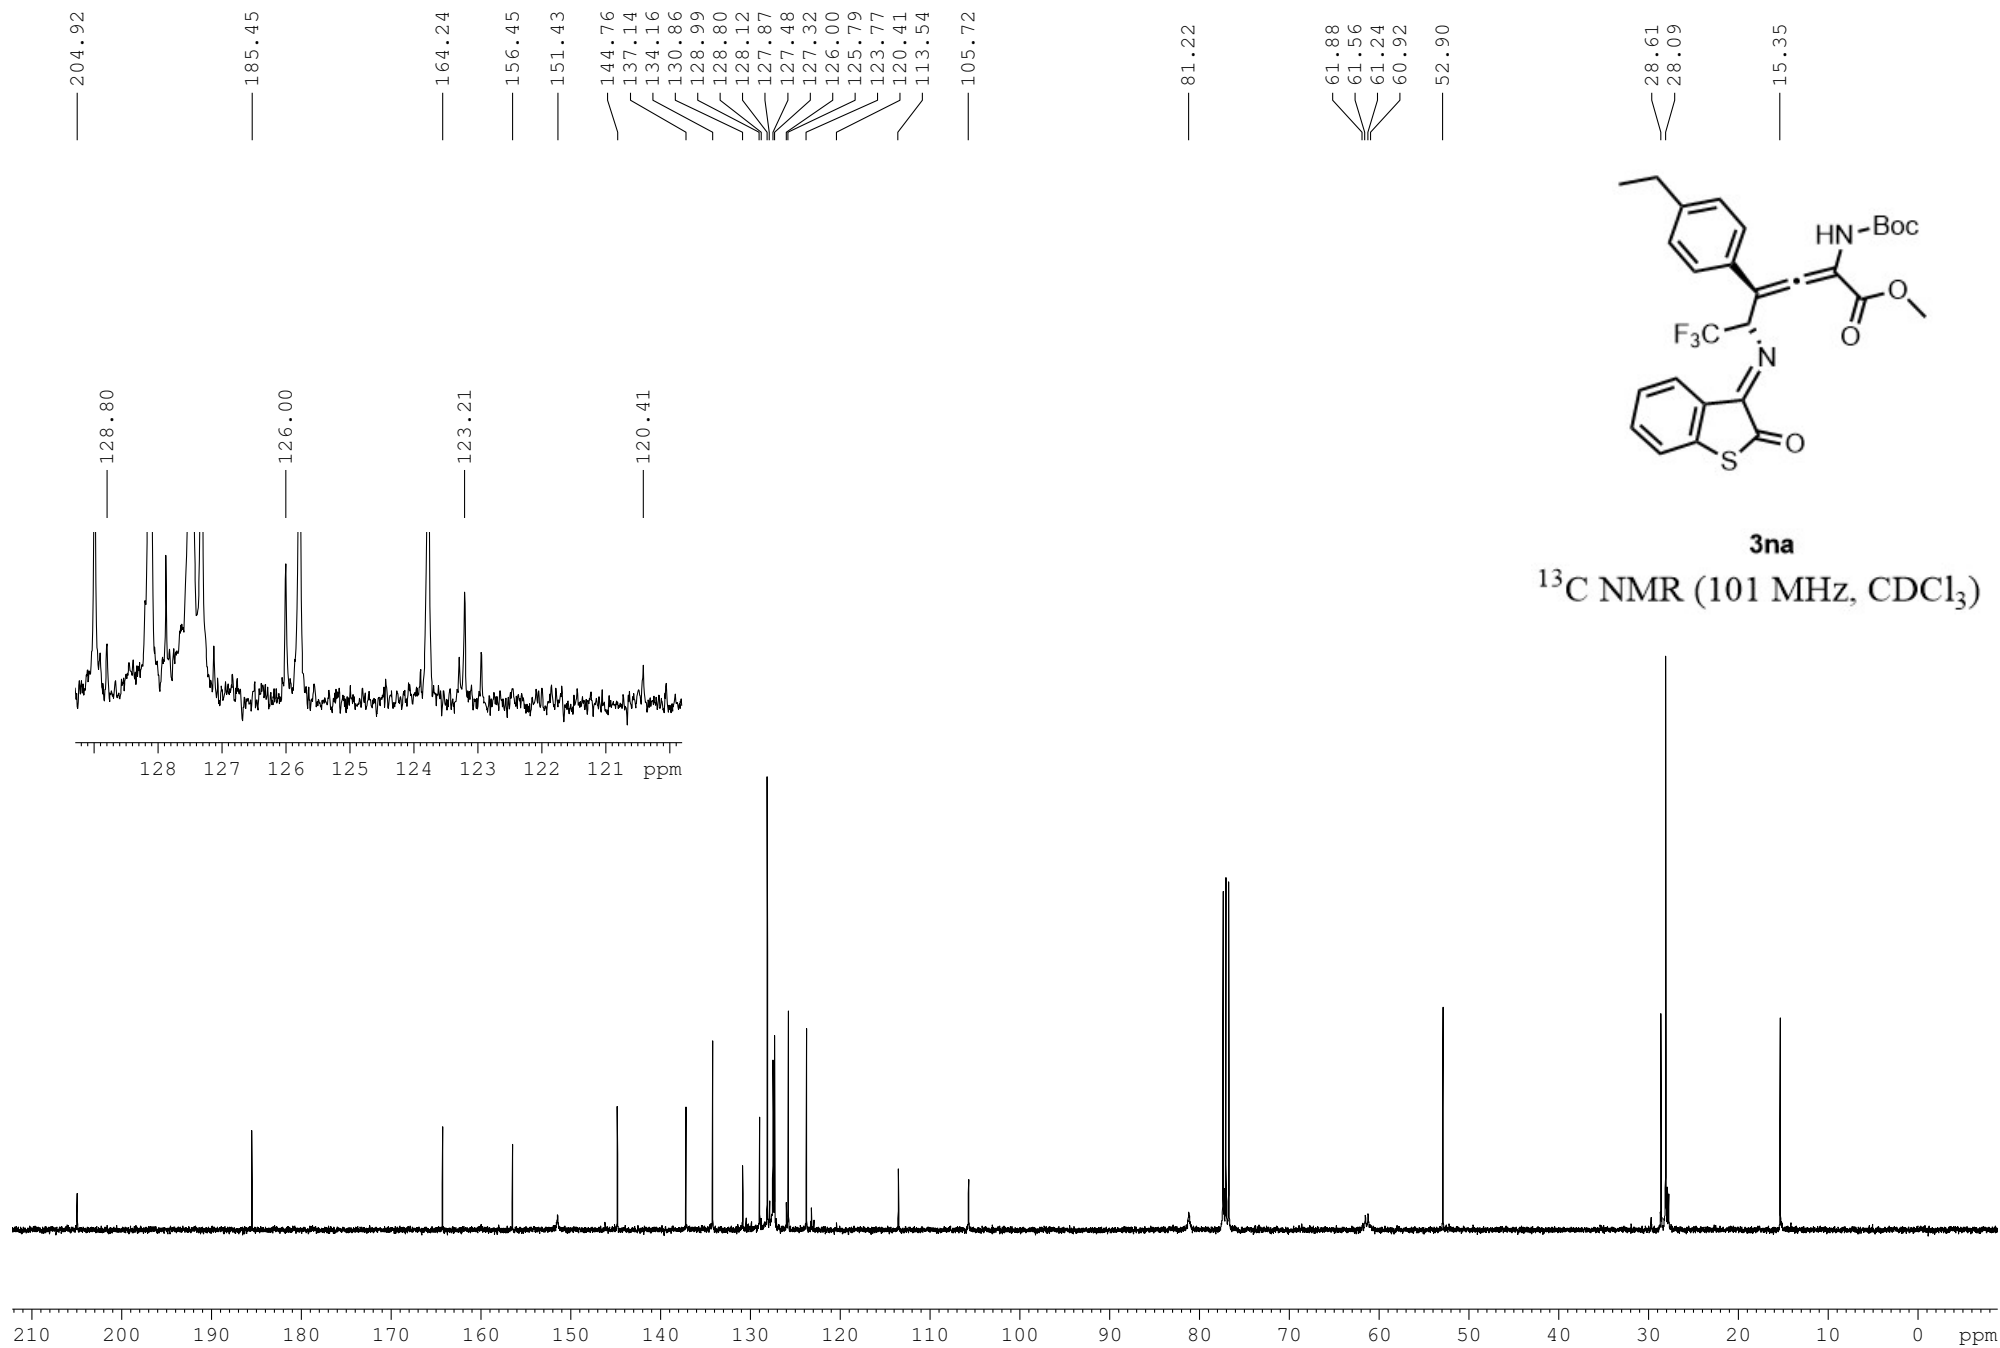



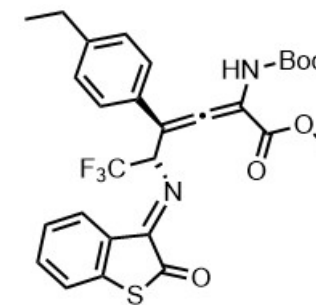

**3na**

$^{19}\text{F}$  NMR (376 MHz,  $\text{CDCl}_3$ )

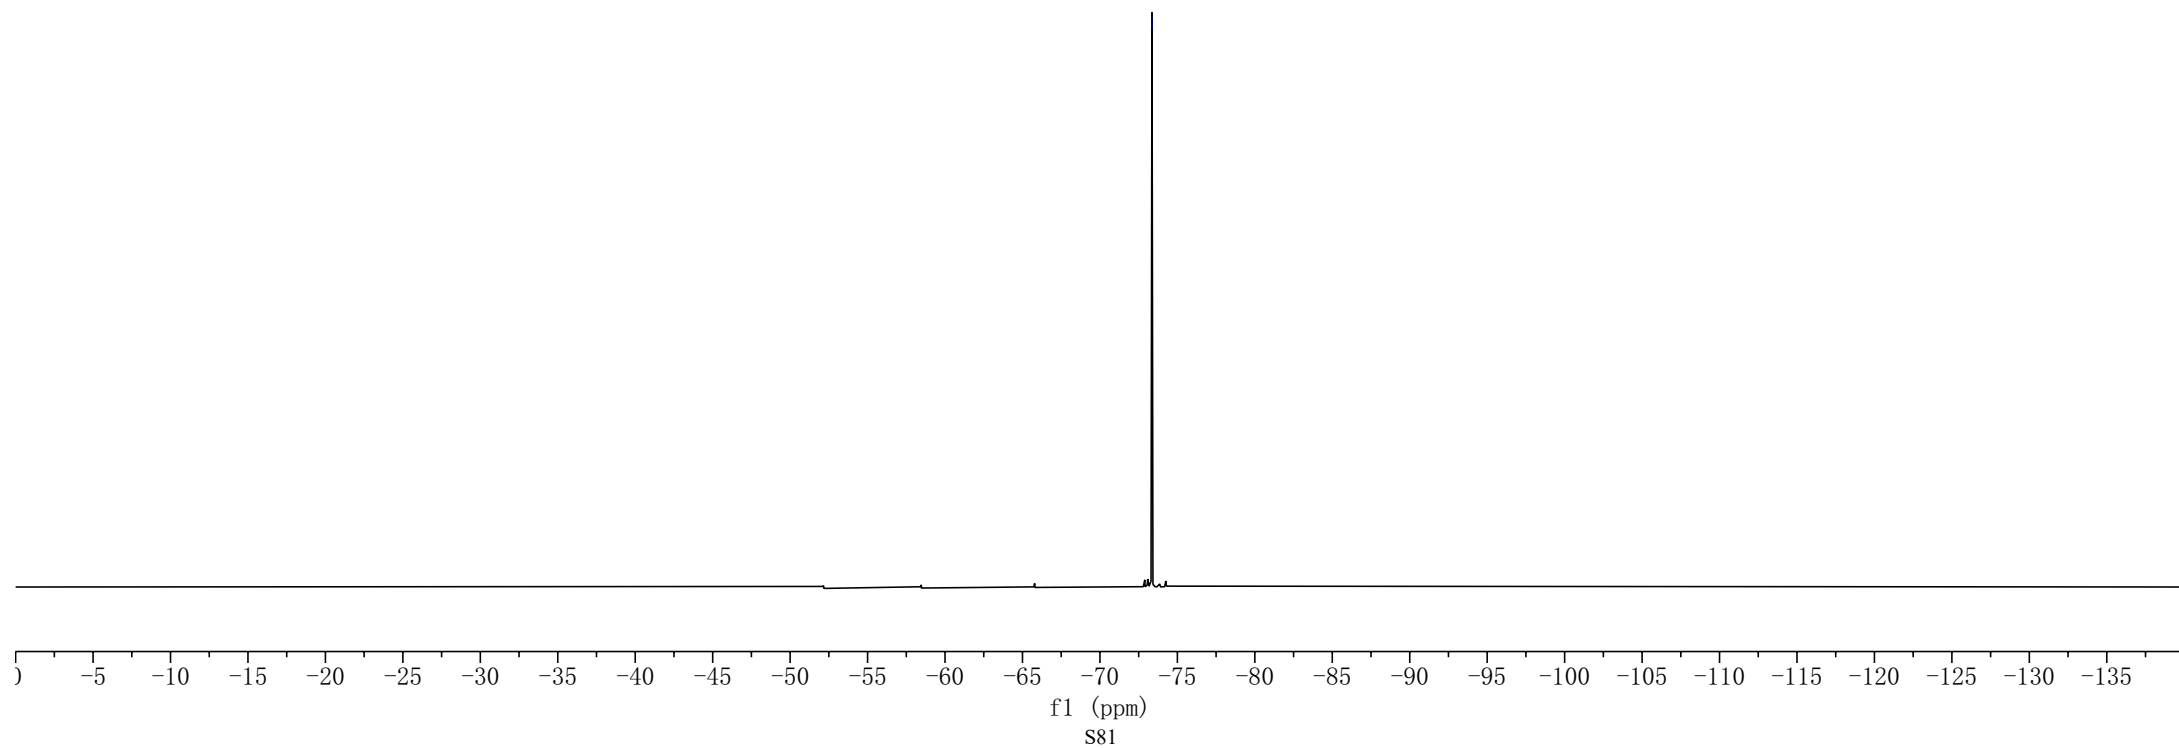

-73.36

f1 (ppm)  
S81

7.75  
7.73  
7.59  
7.57  
7.43  
7.41  
7.39  
7.24  
7.23  
7.22  
7.21  
7.20  
6.87  
6.86  
6.85  
6.84  
6.38  
6.36  
6.35  
6.33  
6.04

3.74

3.25

1.36

0.00

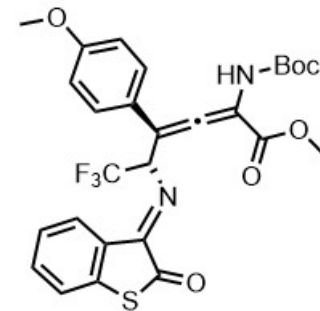

**3oa**

<sup>1</sup>H NMR (400 MHz, CDCl<sub>3</sub>)

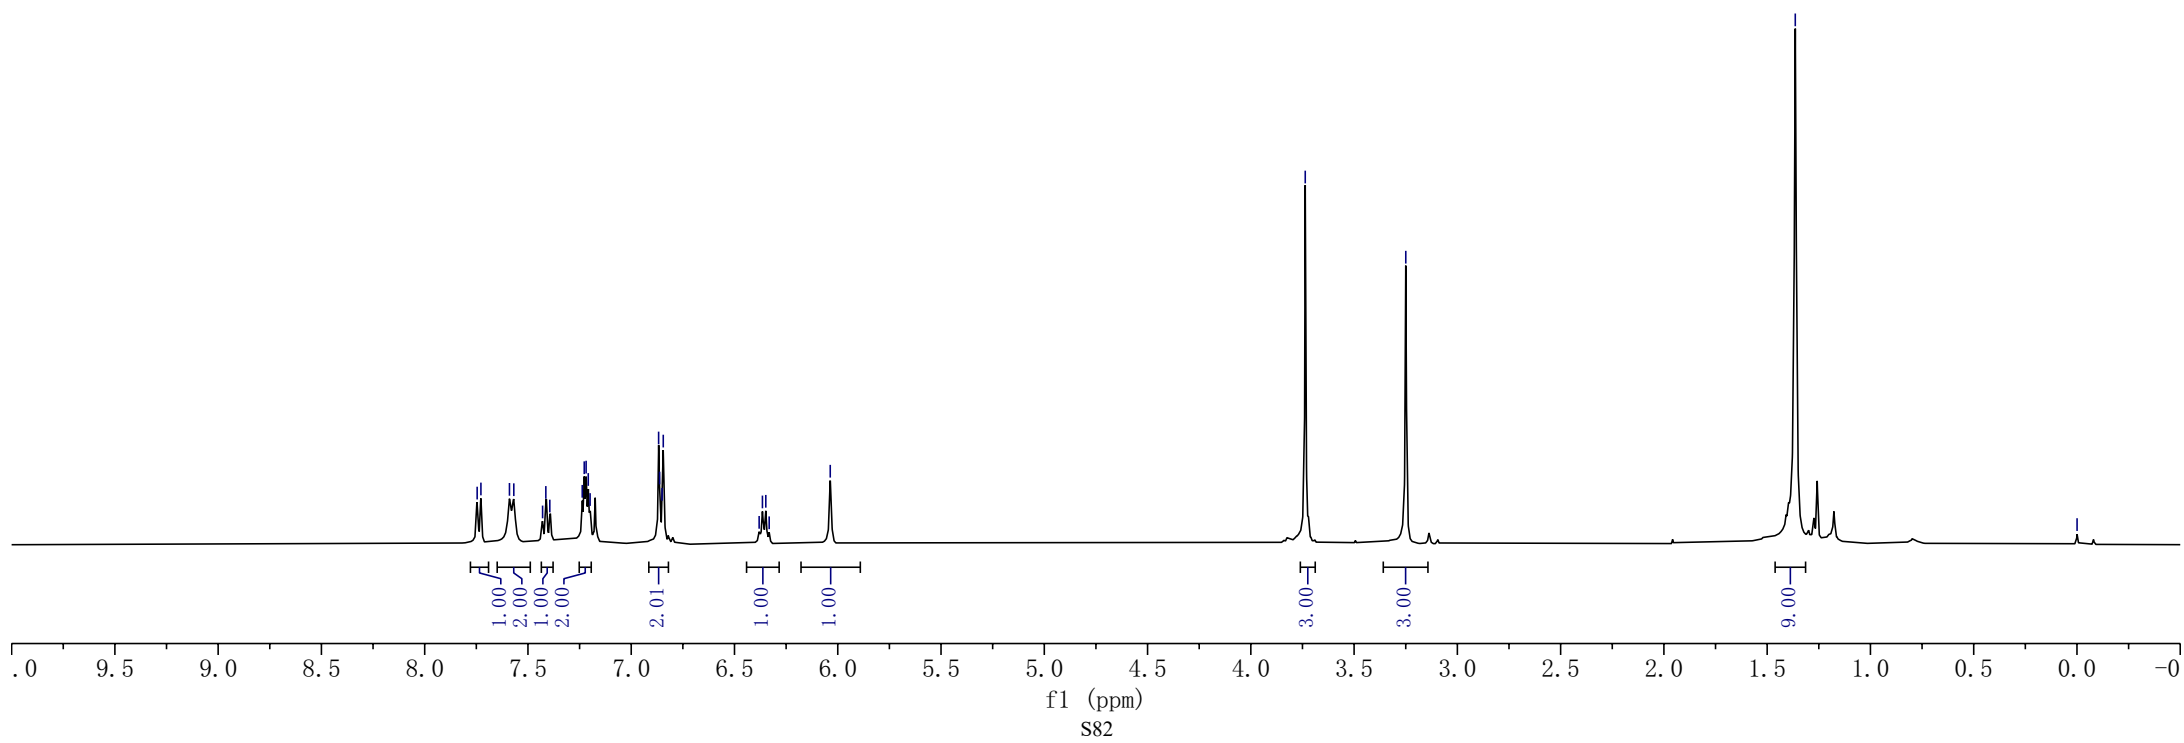

— 204.45  
 — 185.53  
 — 164.22  
 — 159.88  
 — 156.46  
 — 151.45  
 — 137.12  
 — 134.17  
 — 128.97  
 — 128.88  
 — 128.79  
 — 127.32  
 — 126.00  
 — 125.89  
 — 125.78  
 — 123.78  
 — 123.21  
 — 120.41  
 — 114.05  
 — 113.22  
 — 105.59

— 81.13

— 62.01  
 — 61.69  
 — 61.37  
 — 61.04  
 — 55.30  
 — 52.90

— 29.70  
 — 28.09

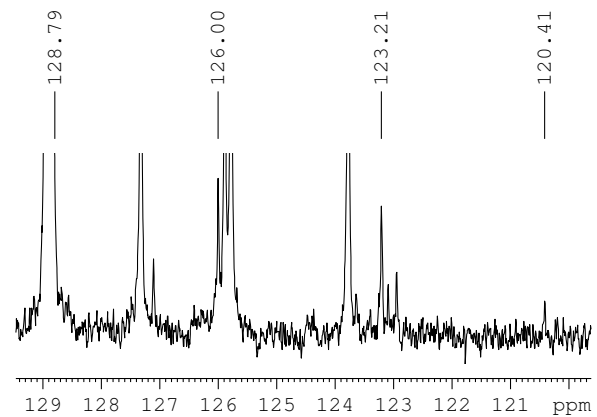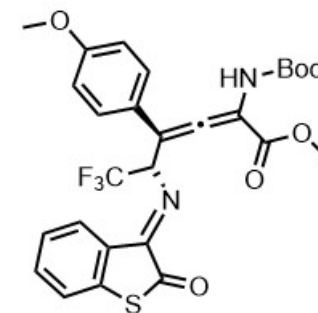

**3oa**

$^{13}\text{C}$  NMR (101 MHz,  $\text{CDCl}_3$ )

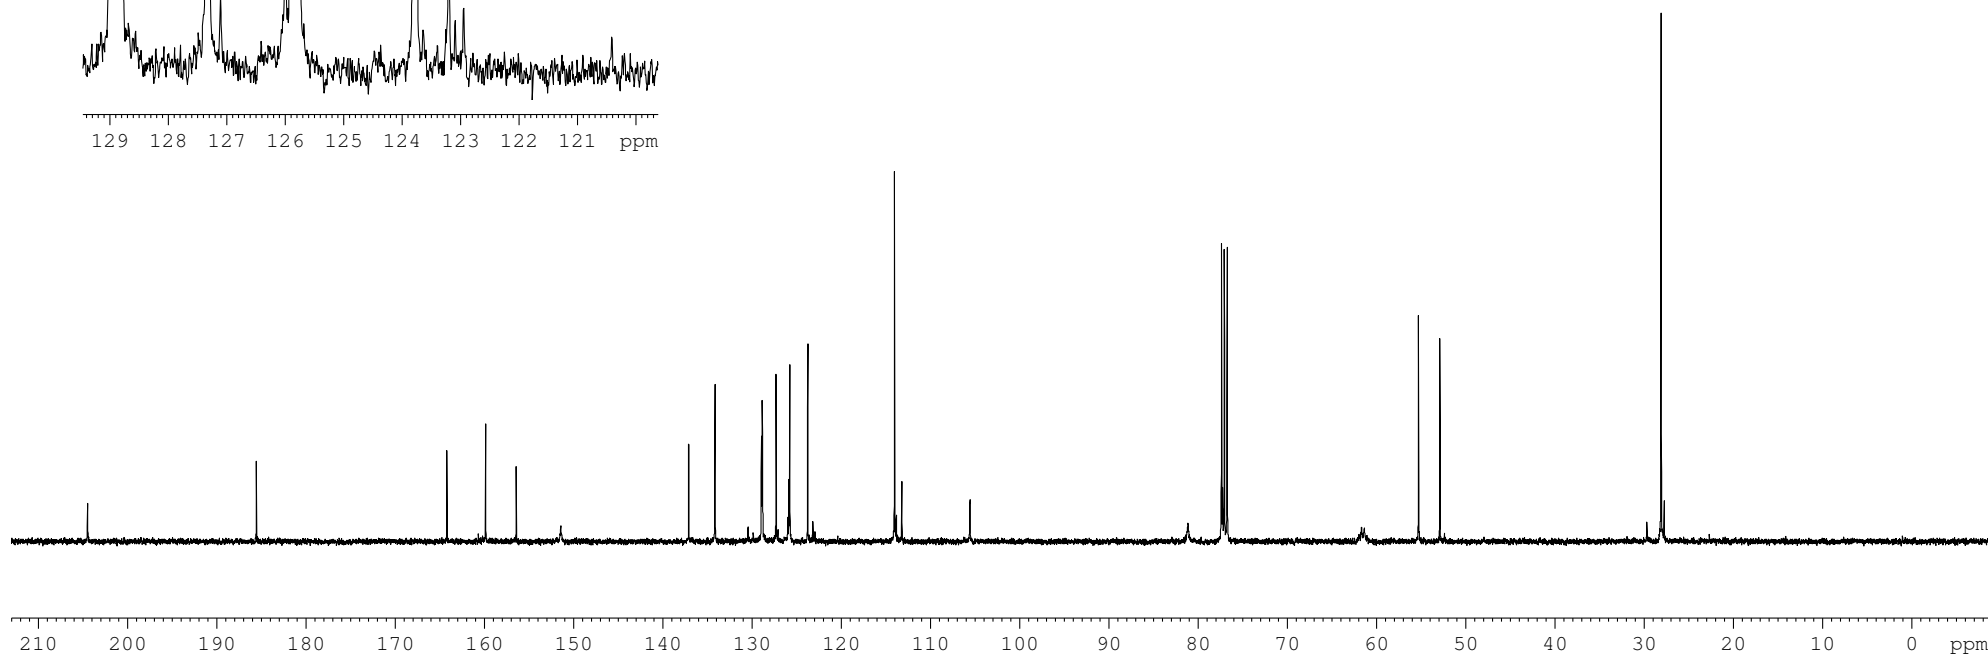

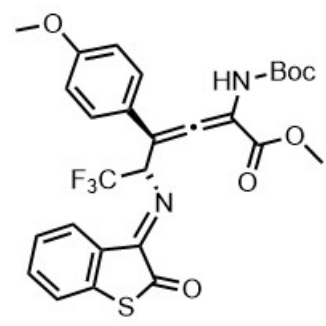

**3oa**

<sup>19</sup>F NMR (376 MHz, CDCl<sub>3</sub>)

-73.38

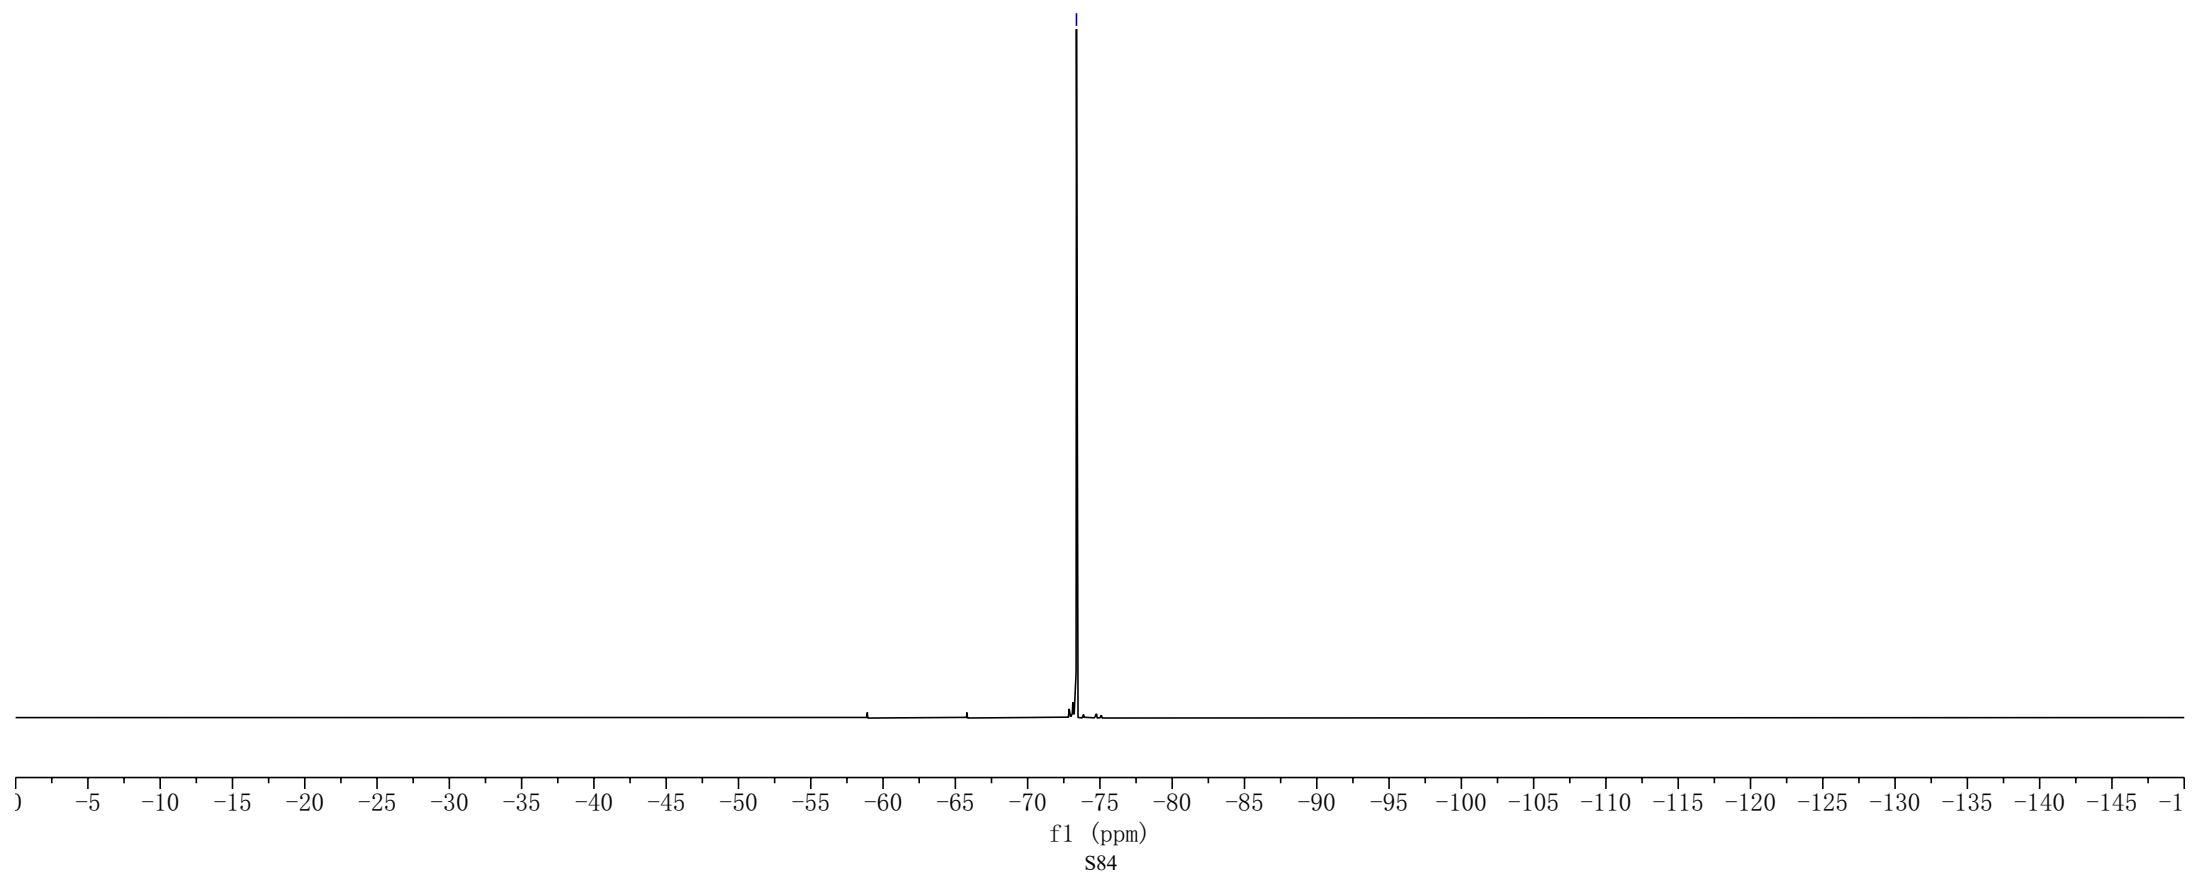

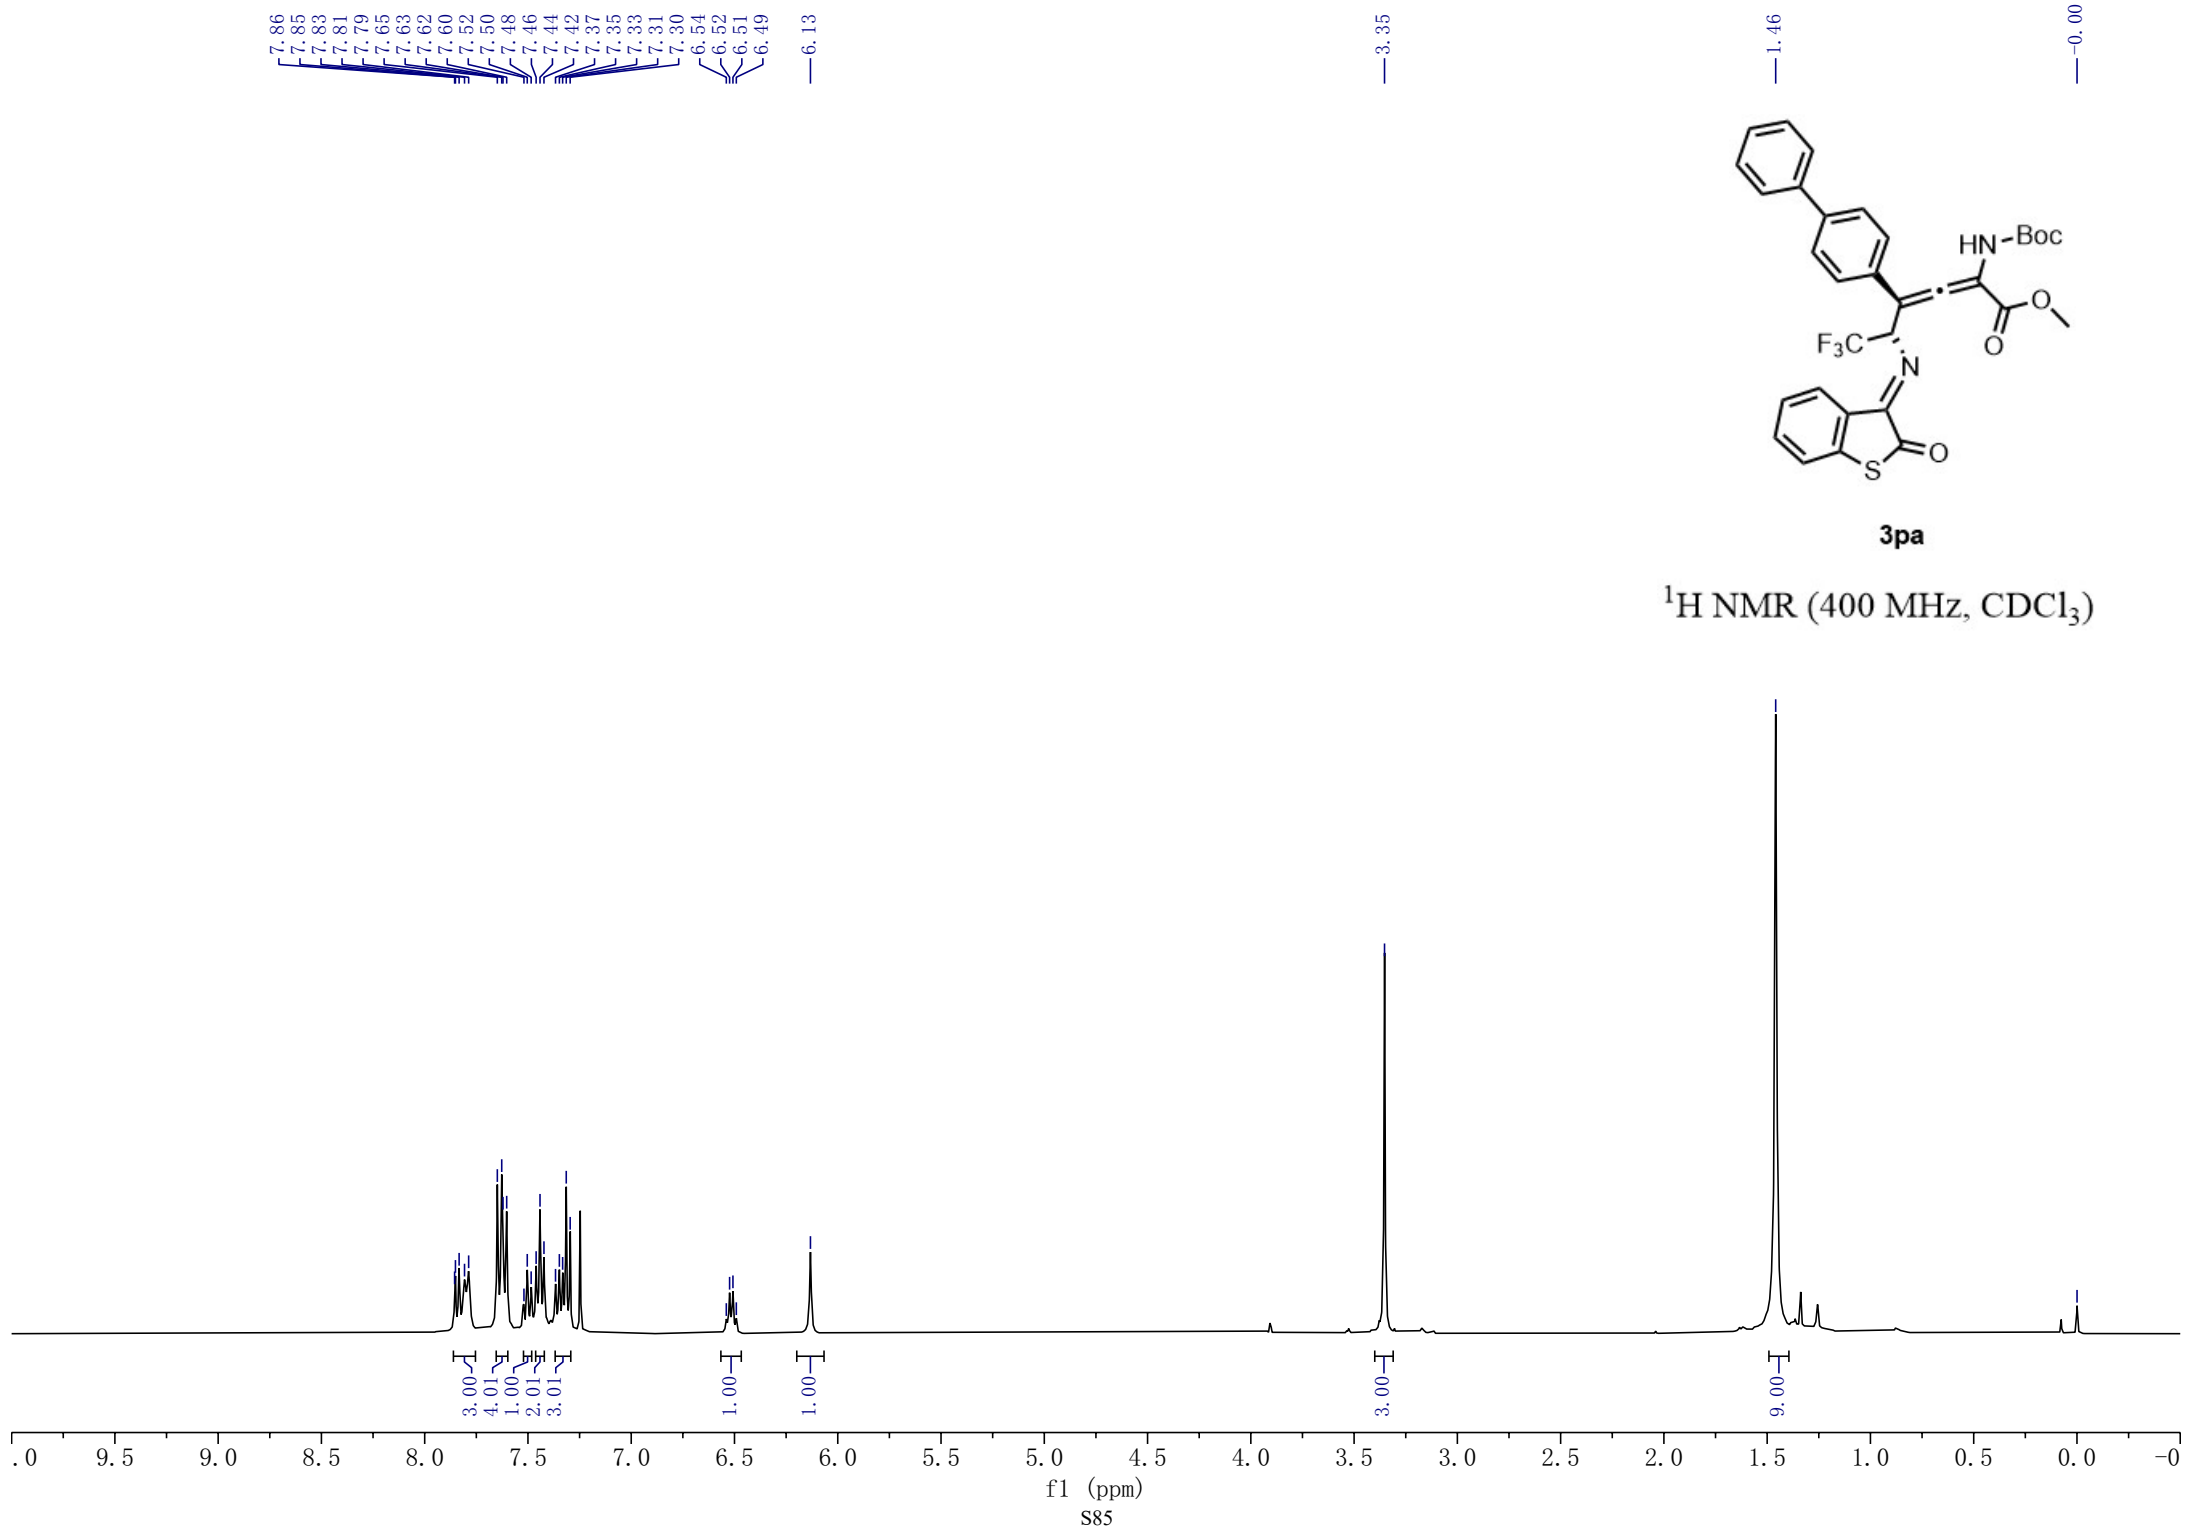

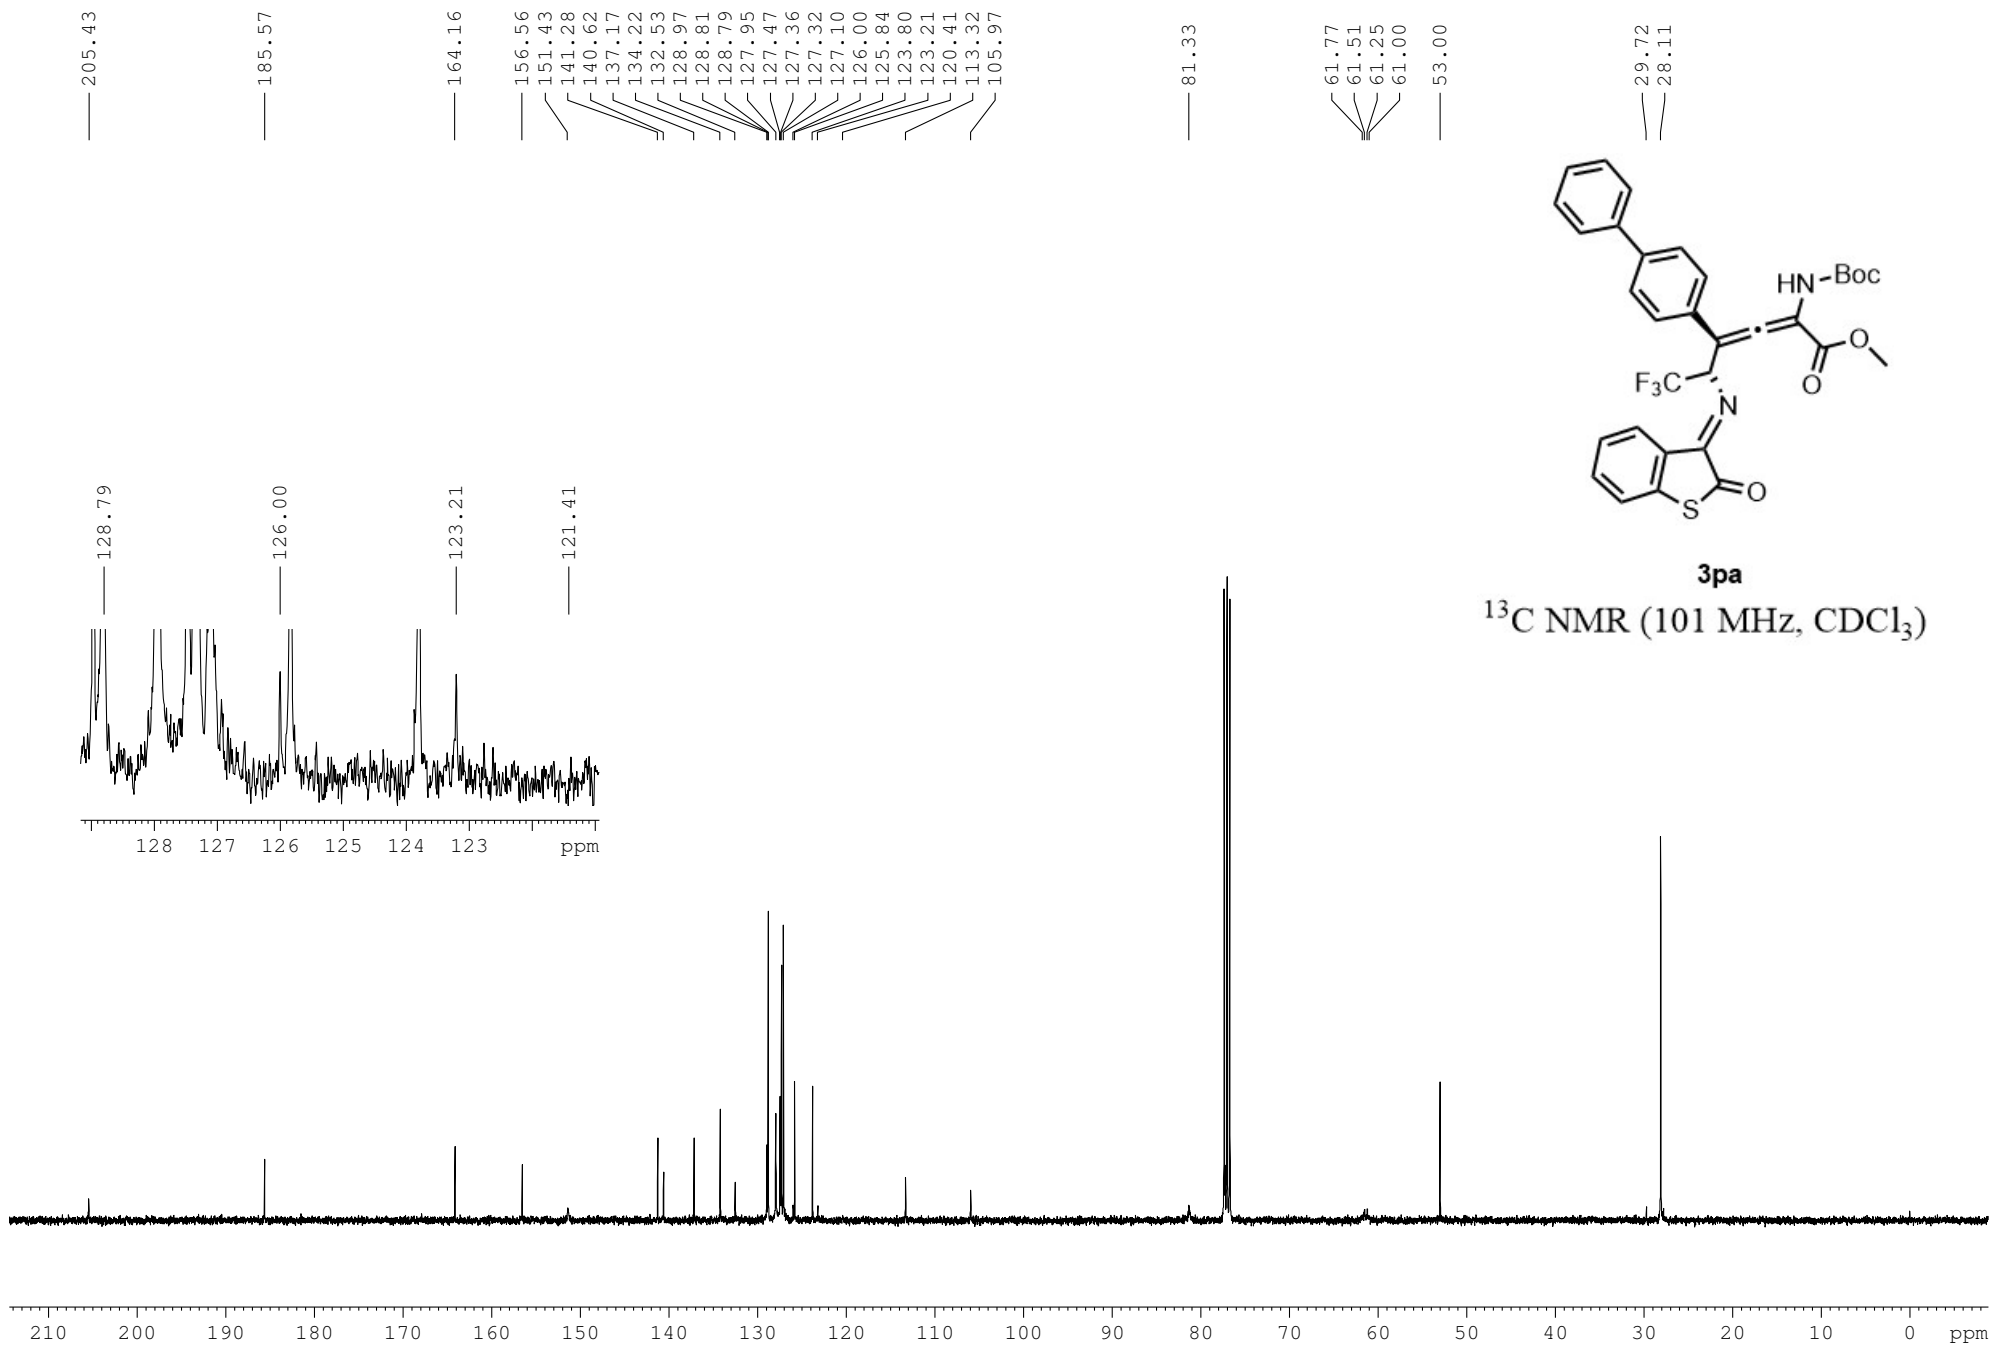

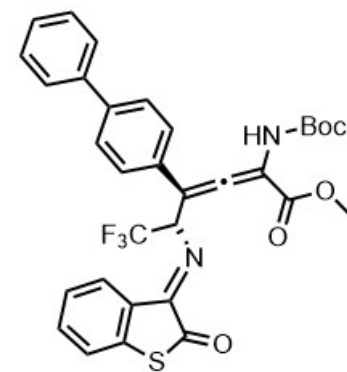

**3pa**

$^{19}\text{F}$  NMR (376 MHz,  $\text{CDCl}_3$ )

-73.37

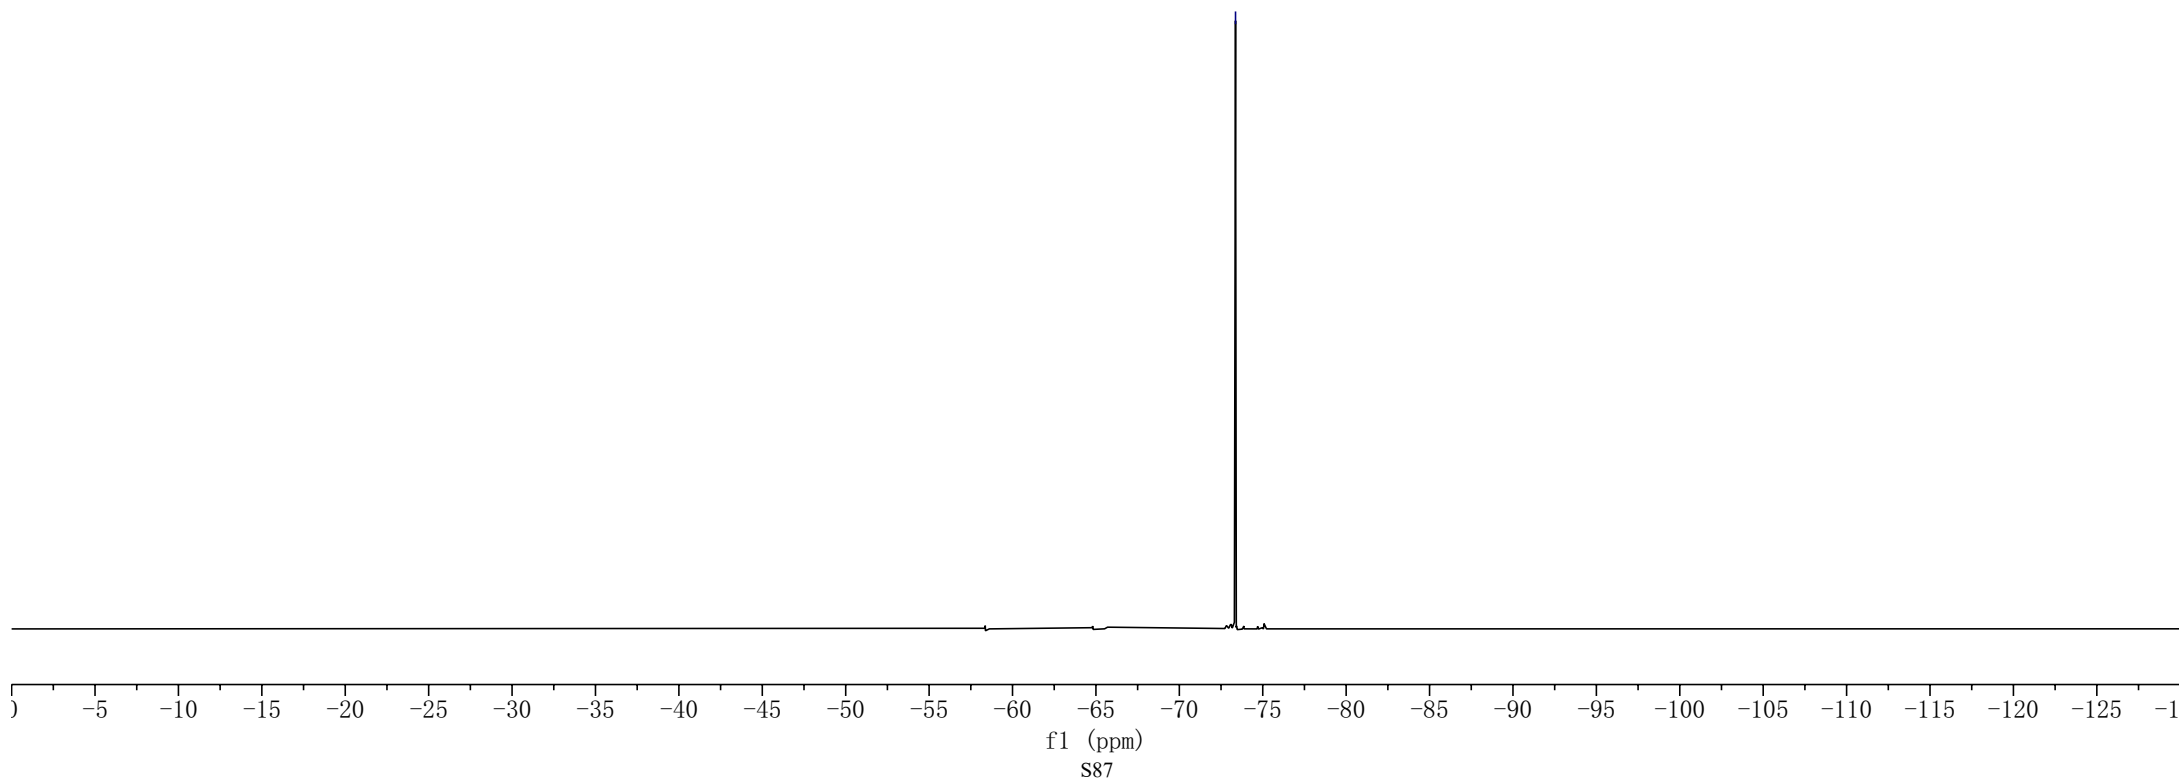

7.66  
7.64  
7.57  
7.56  
7.35  
7.33  
7.31  
7.27  
7.26  
7.25  
7.23  
7.12  
7.10  
6.40  
6.39  
6.37  
6.36  
6.04

3.29

2.31

1.37

-0.00

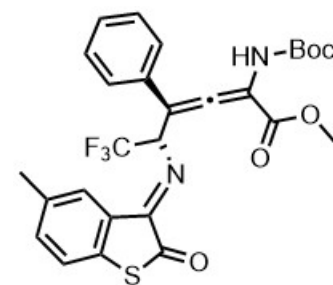

**3ab**

<sup>1</sup>H NMR (400 MHz, CDCl<sub>3</sub>)

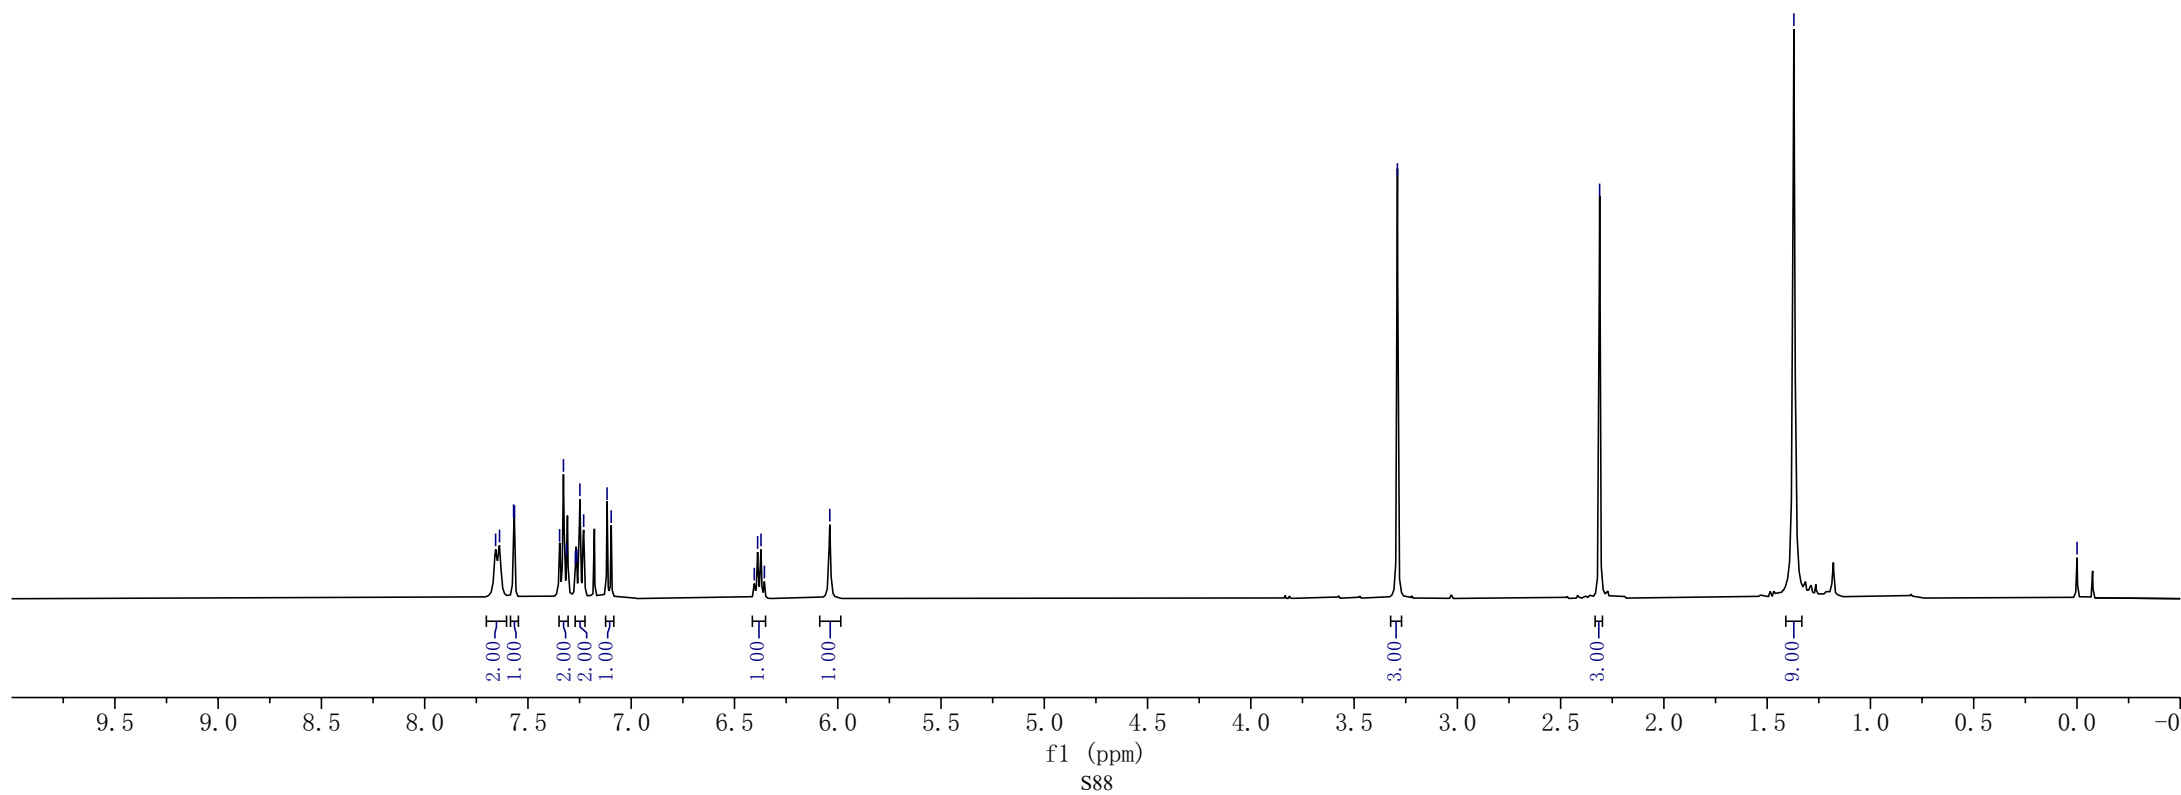



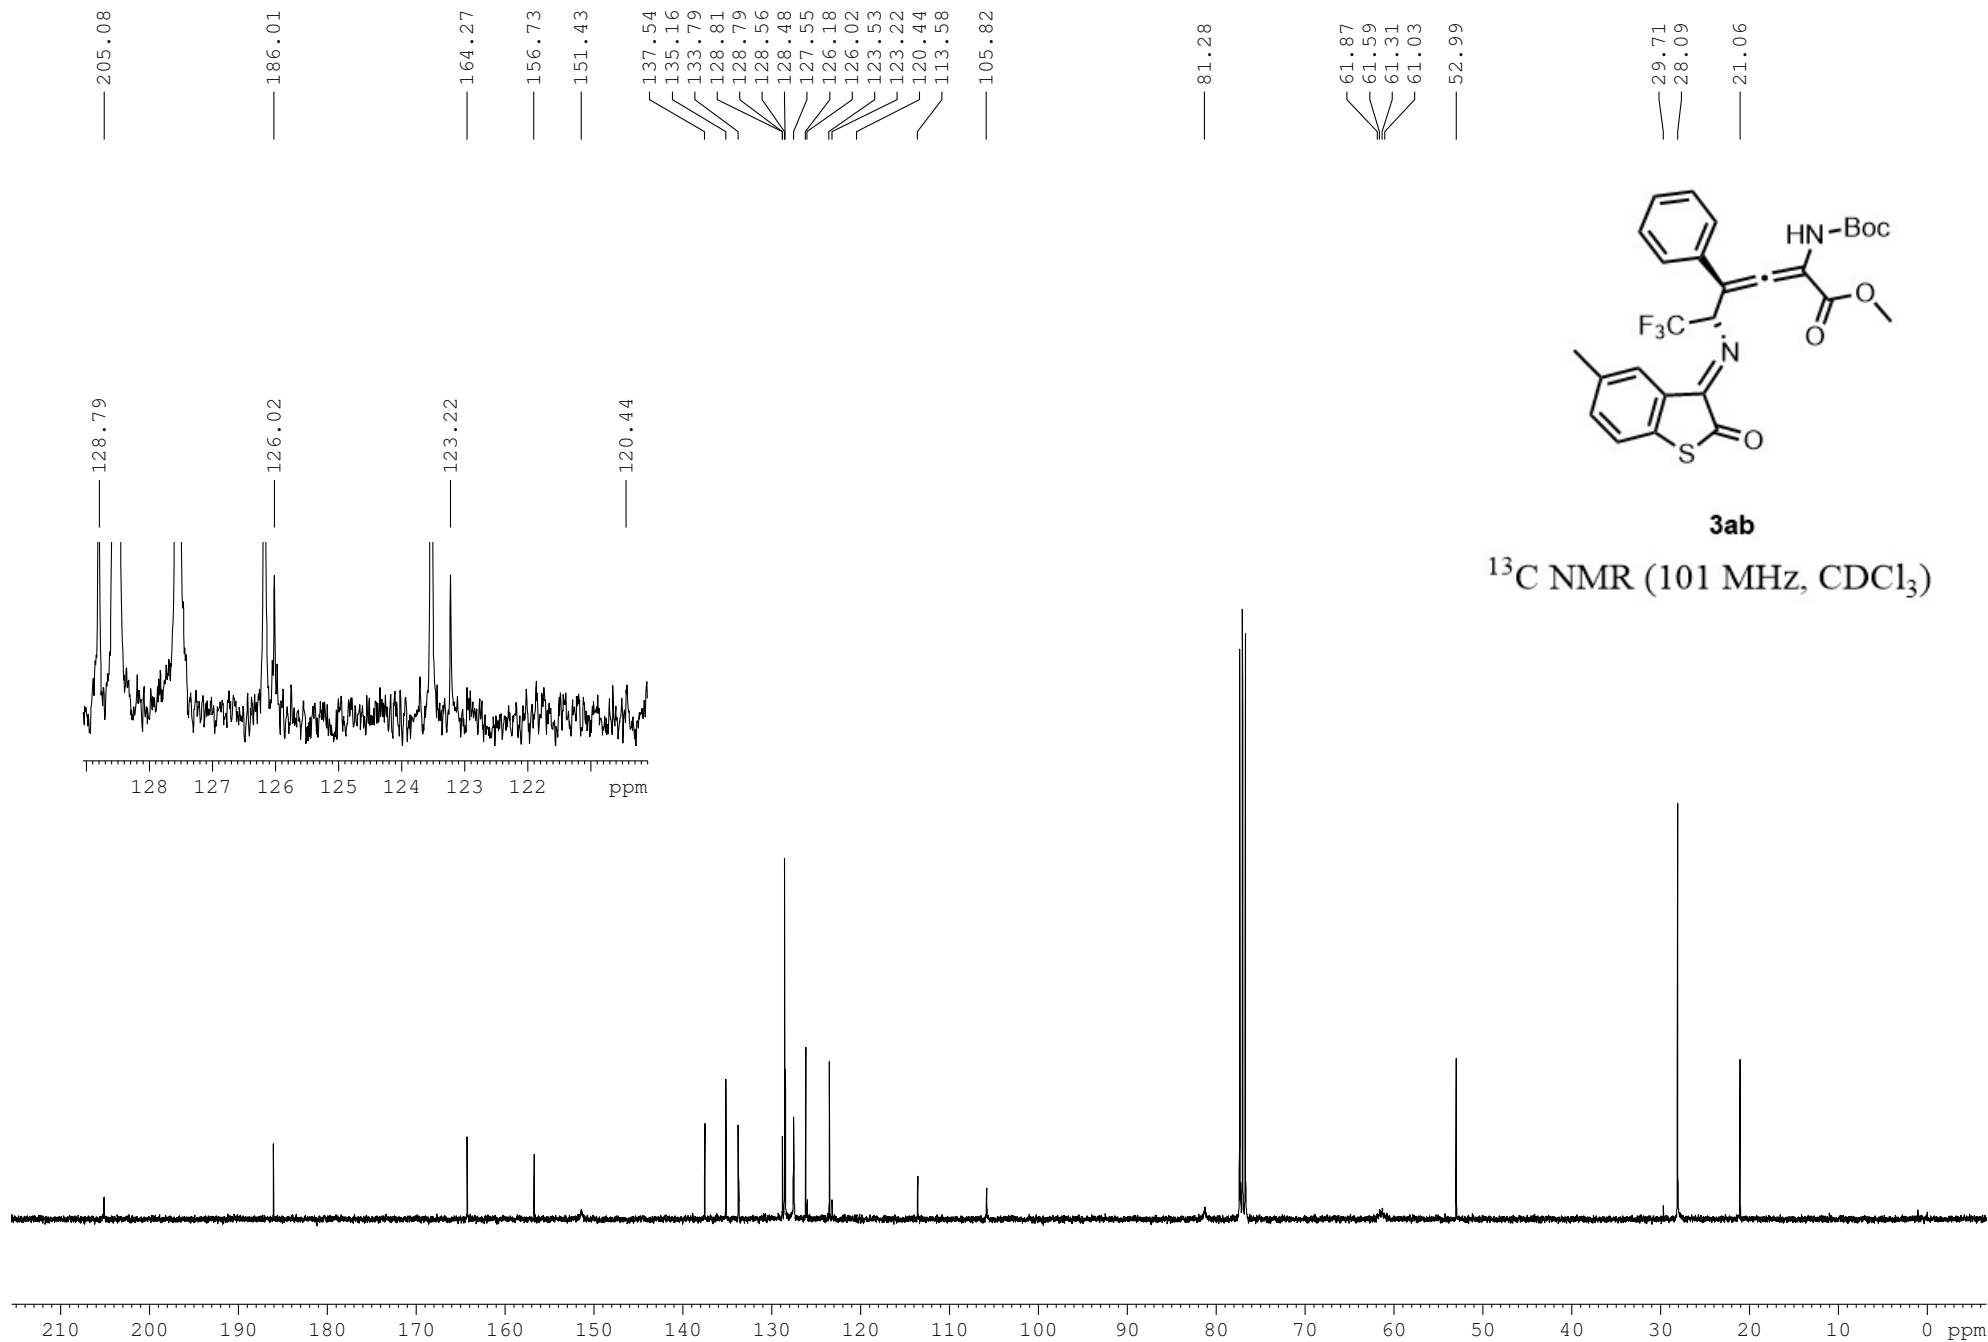

-73.40

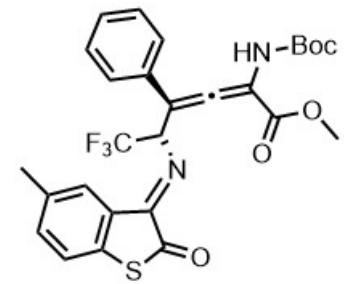

**3ab**

$^{19}\text{F}$  NMR (376 MHz,  $\text{CDCl}_3$ )

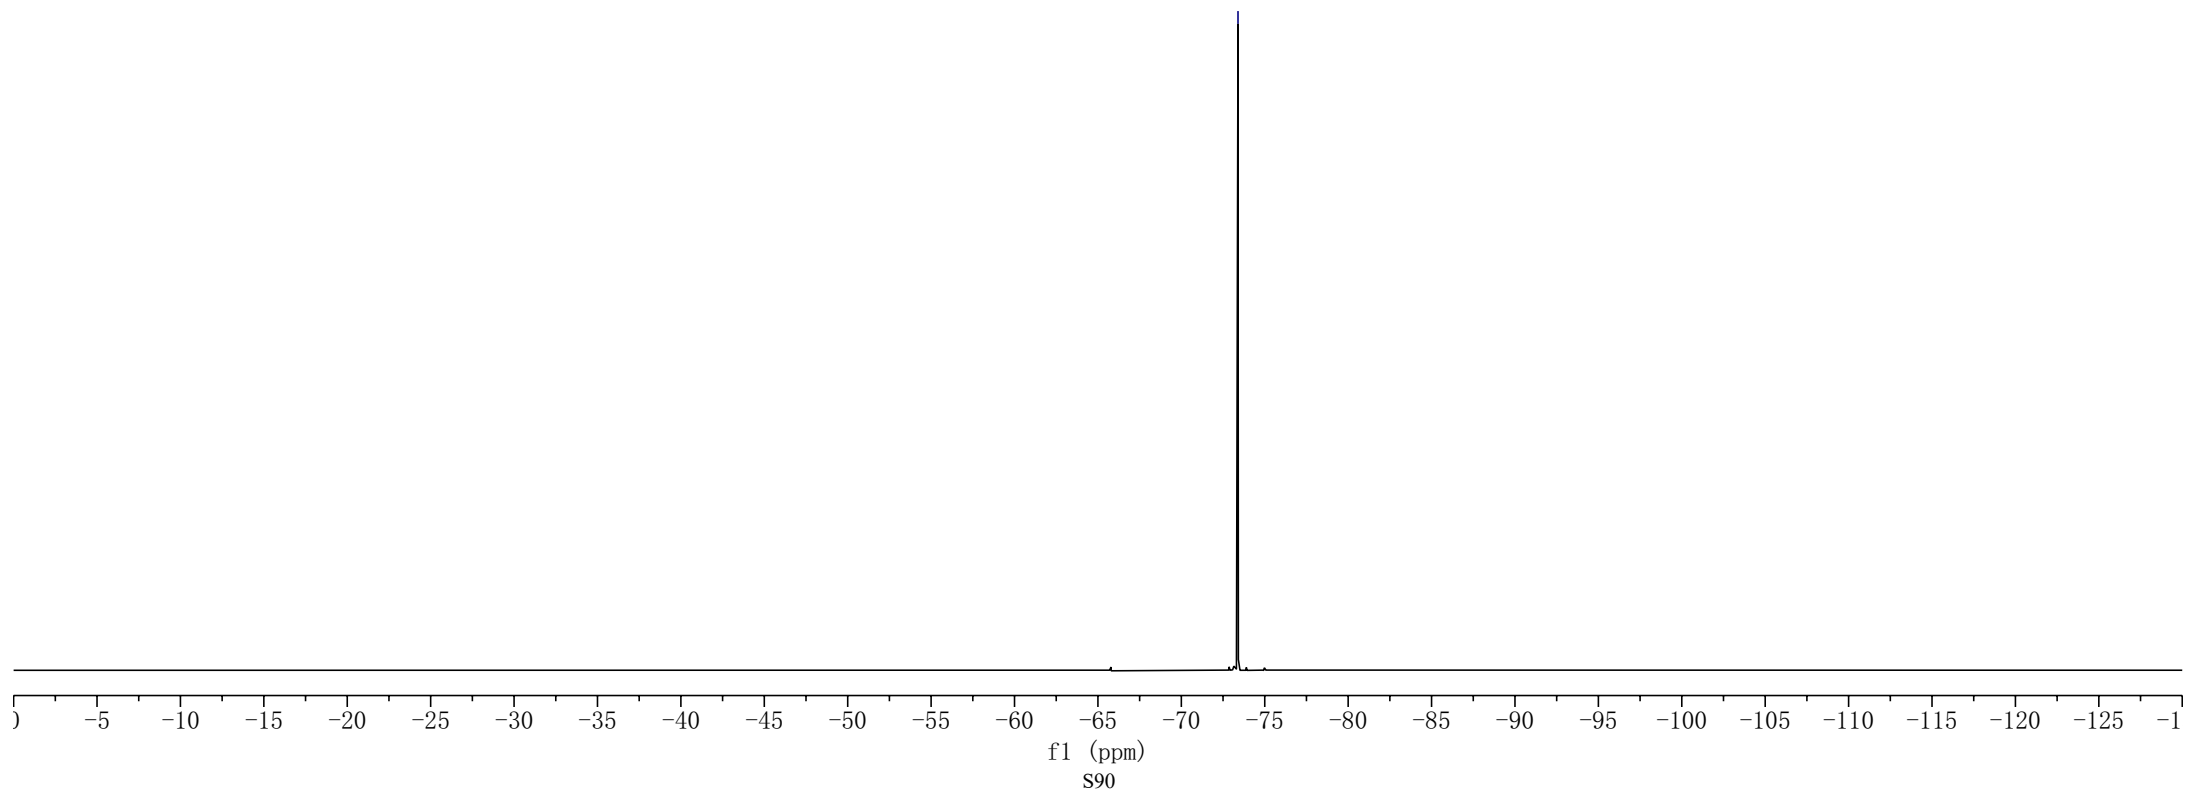

7.79  
7.73  
7.71  
7.56  
7.55  
7.54  
7.53  
7.42  
7.40  
7.39  
7.38  
7.37  
7.34  
7.33  
7.32  
7.31  
7.30  
7.23  
7.21  
6.58  
6.56  
6.55  
6.53  
— 6.13

— 3.29

1.44  
1.35

— 0.00

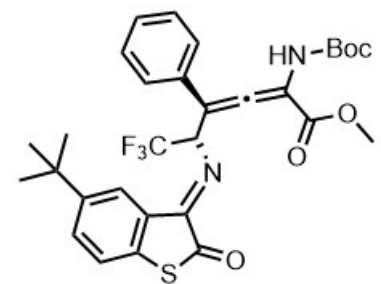

**3ac**

<sup>1</sup>H NMR (400 MHz, CDCl<sub>3</sub>)

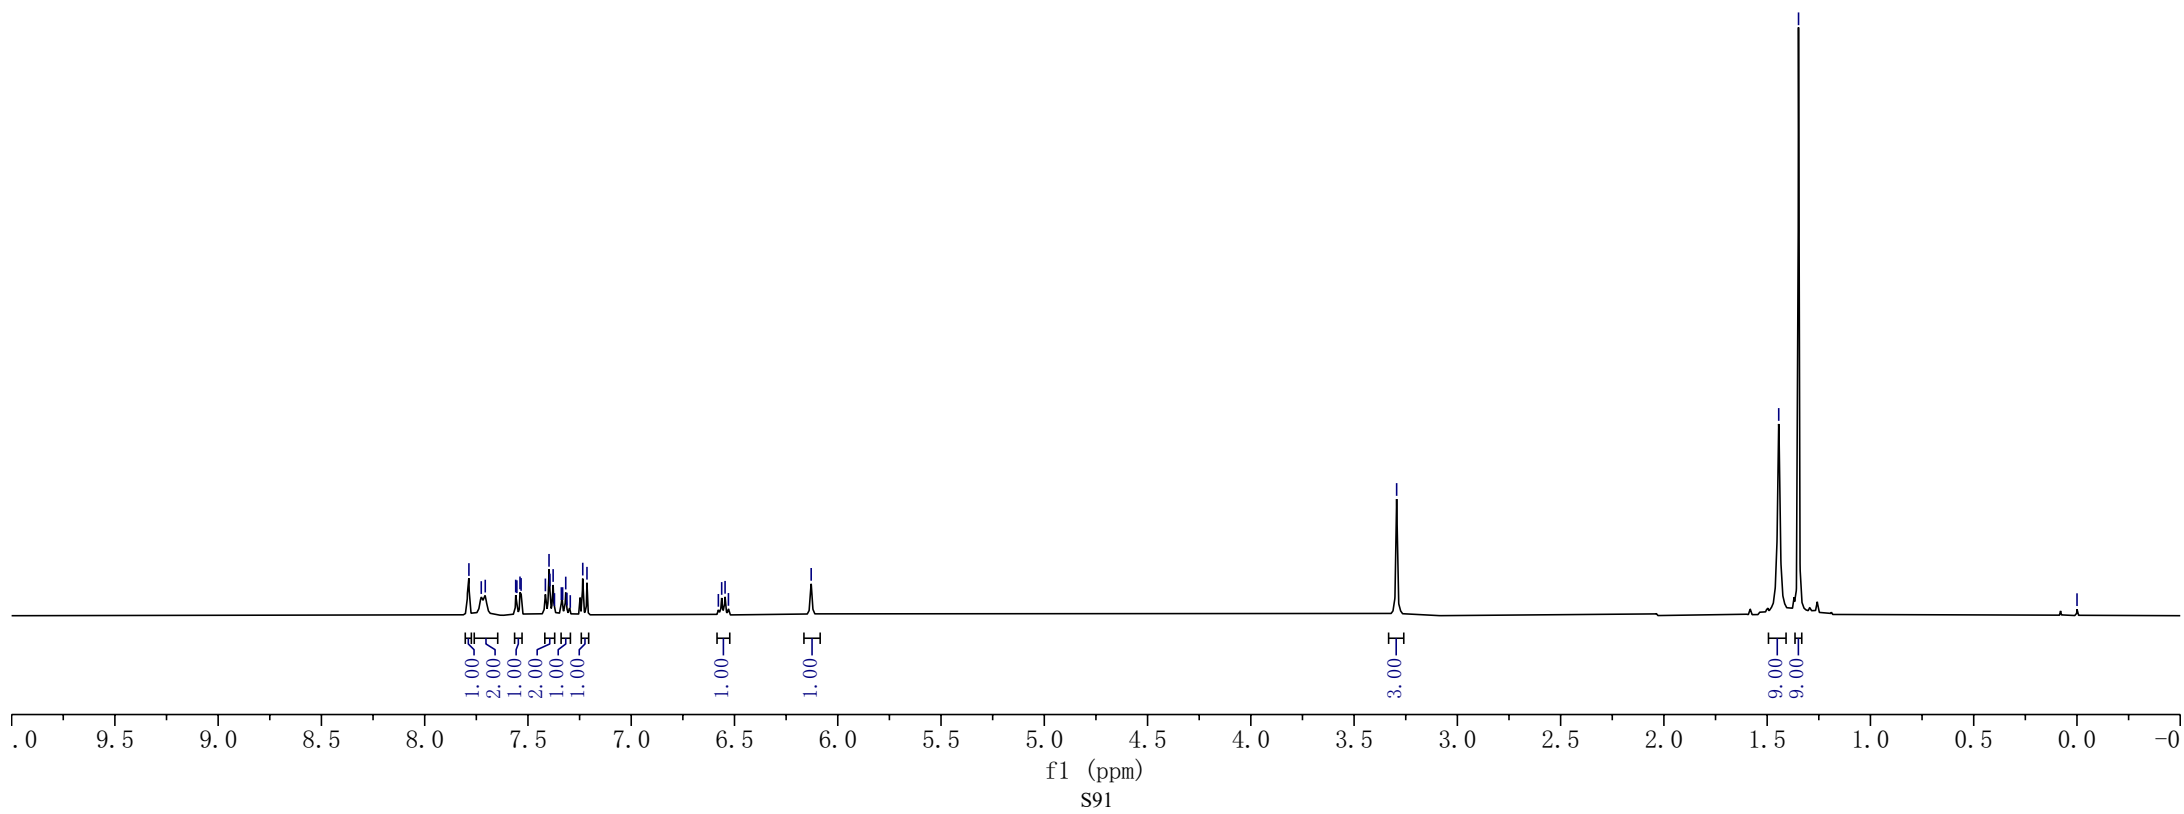

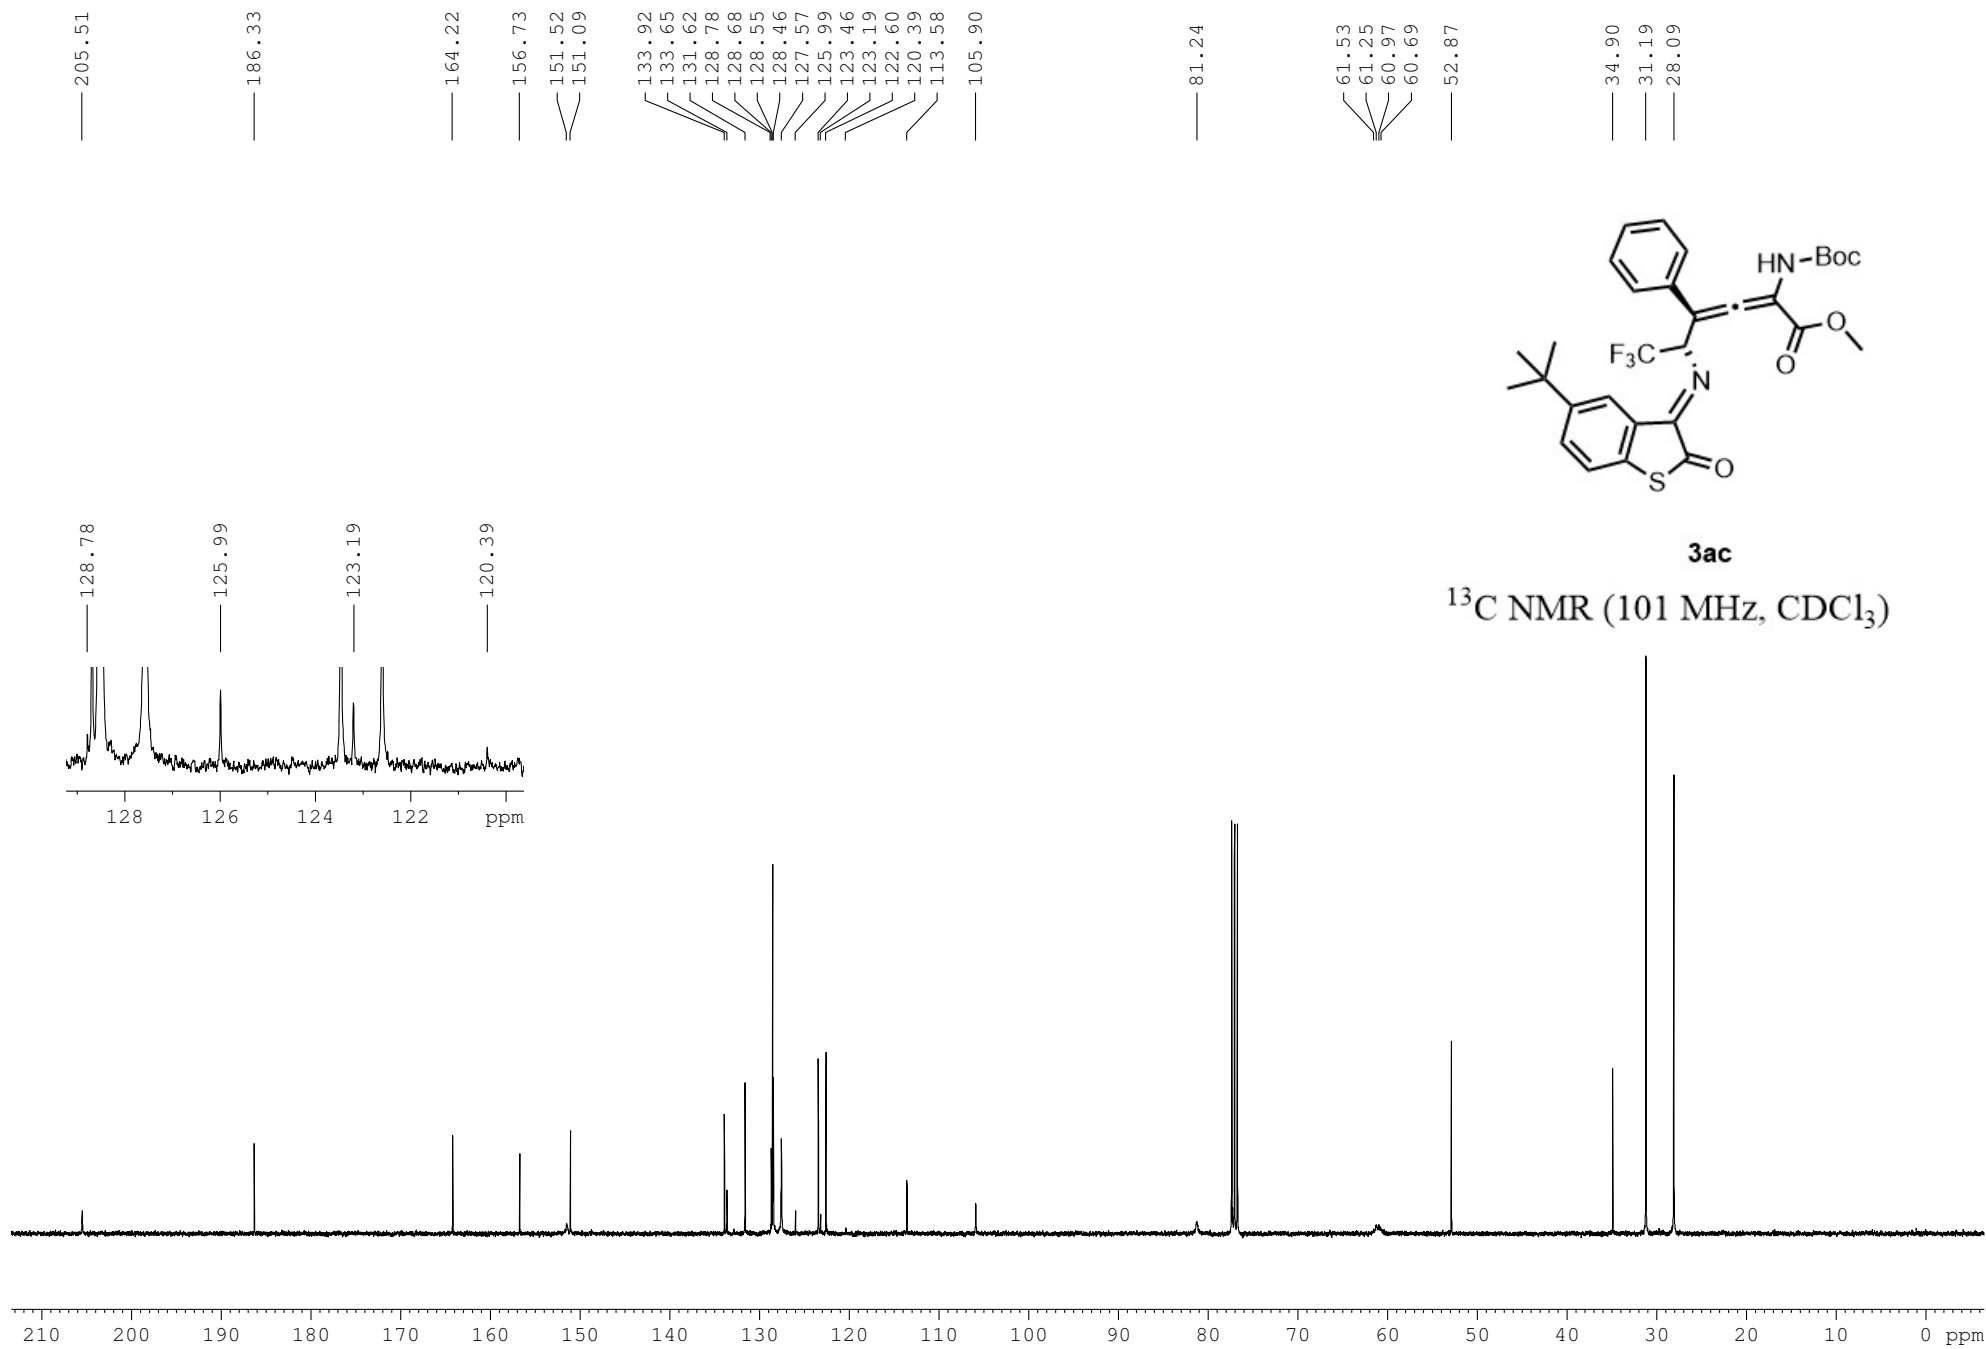

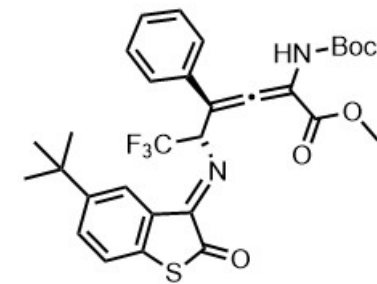

**3ac**

<sup>19</sup>F NMR (376 MHz, CDCl<sub>3</sub>)

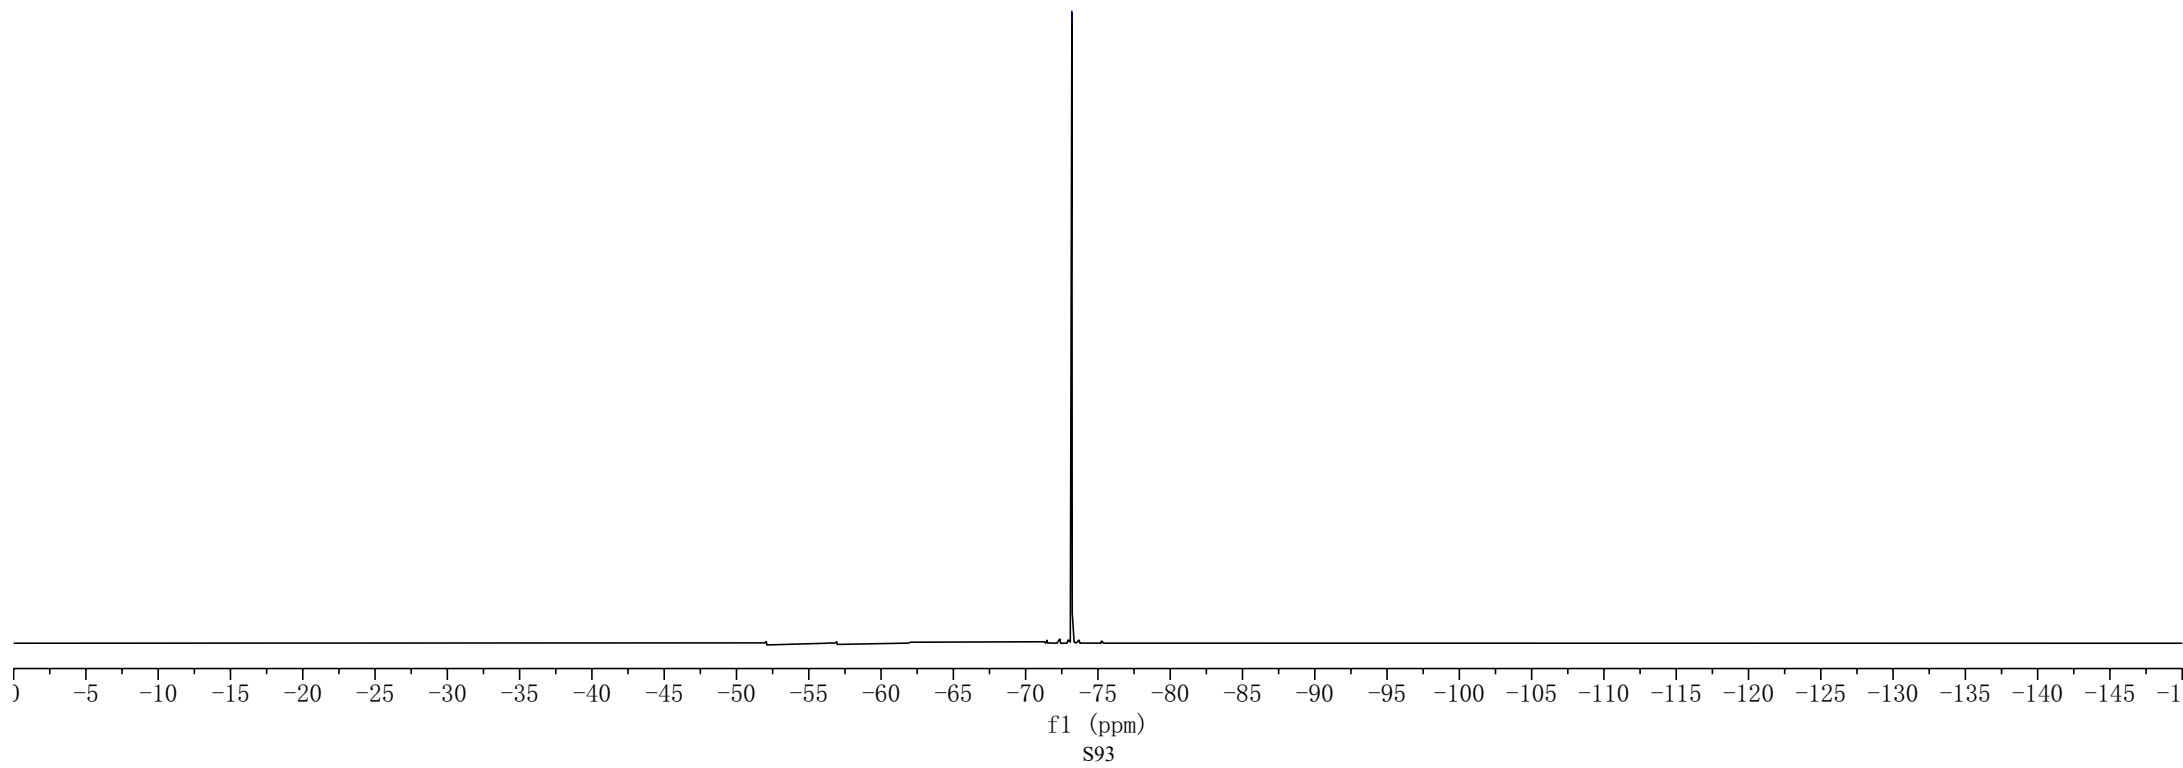

7.65  
7.64  
7.63  
7.62  
7.34  
7.32  
7.30  
7.26  
7.24  
7.22  
7.03  
7.01  
6.41  
6.39  
6.38  
6.36  
6.03

3.28

2.32

1.36

0.00

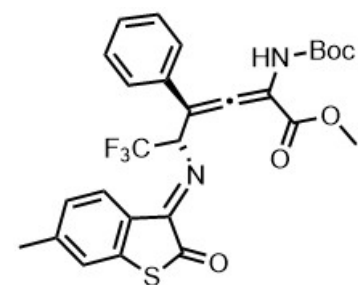

**3ad**

$^1\text{H NMR}$  (400 MHz,  $\text{CDCl}_3$ )

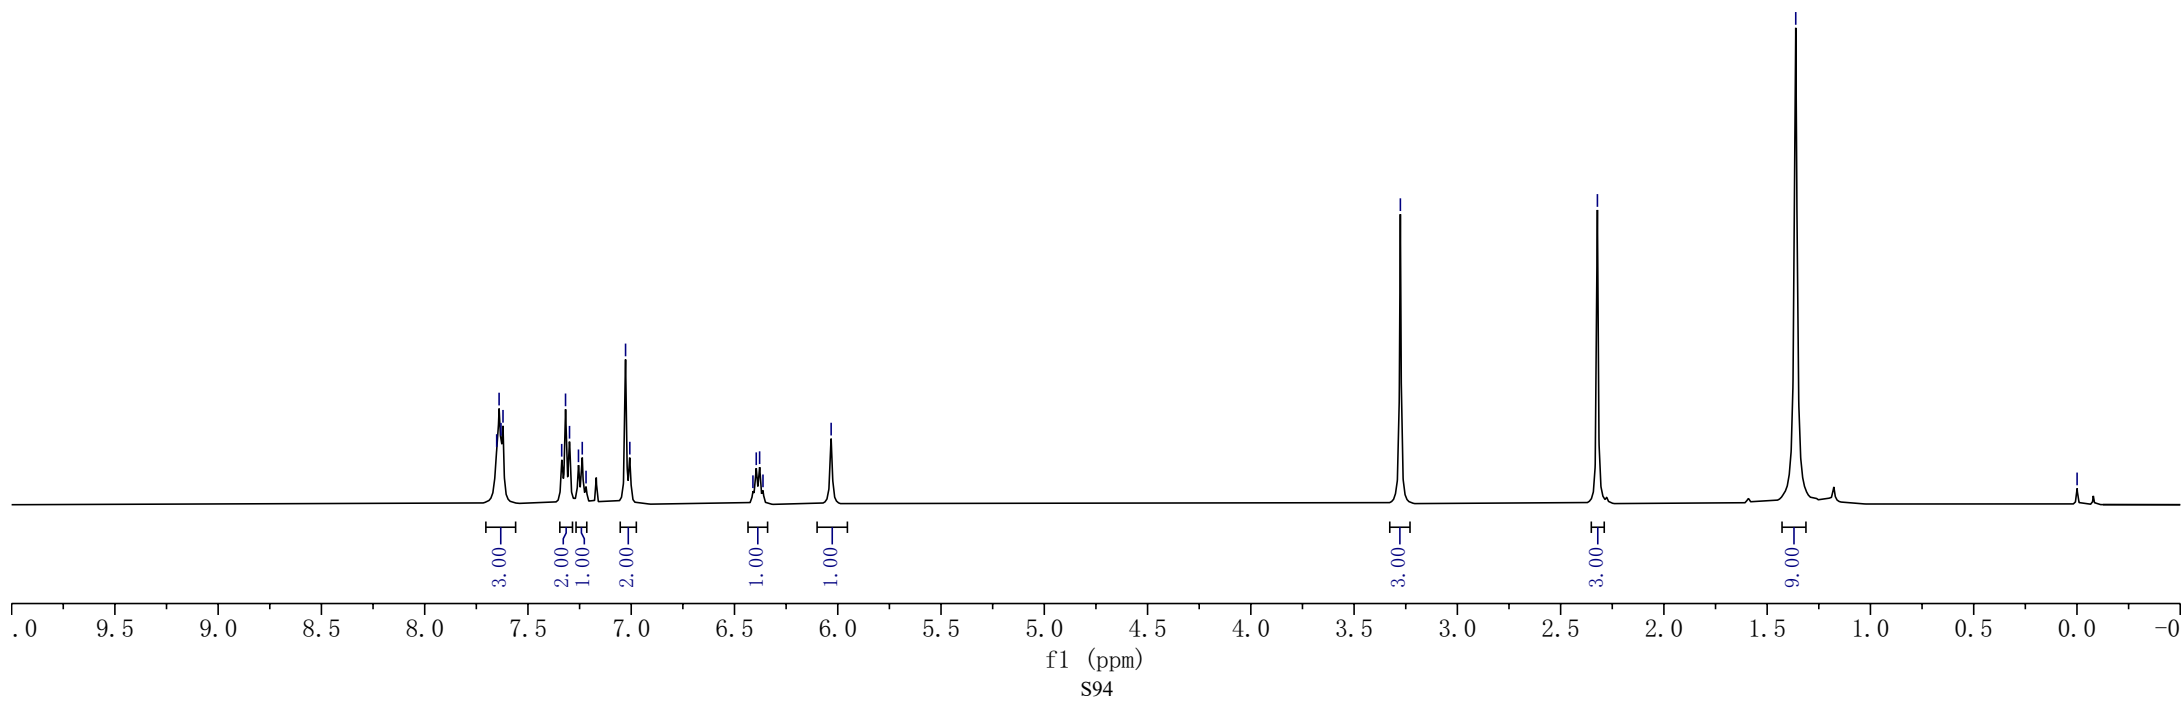

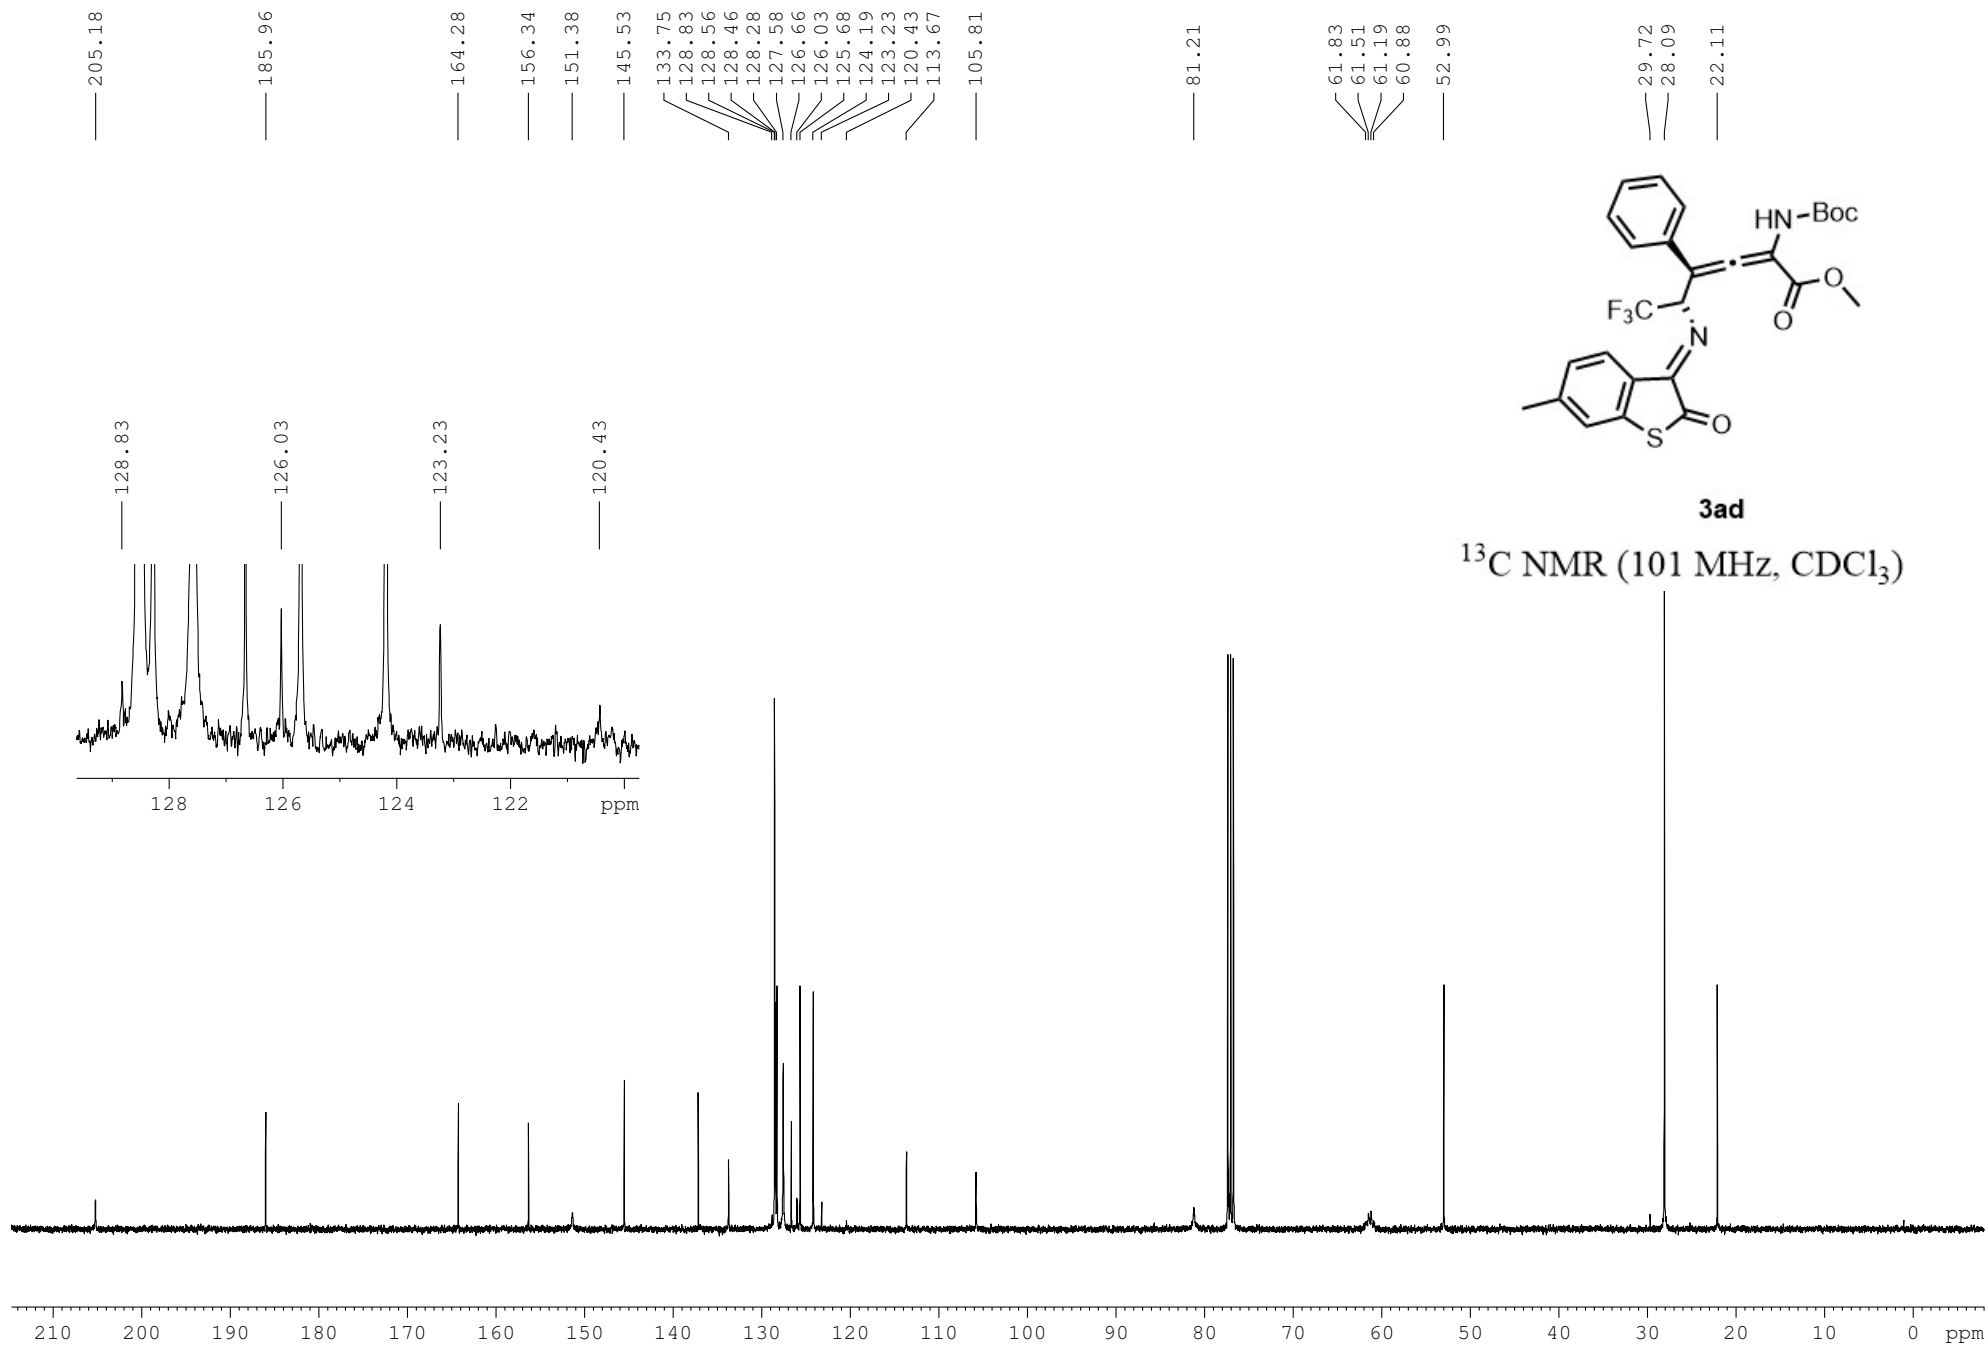

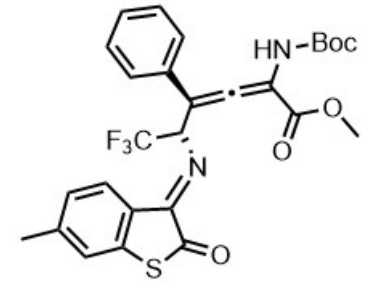

**3ad**

$^{19}\text{F}$  NMR (376 MHz,  $\text{CDCl}_3$ )

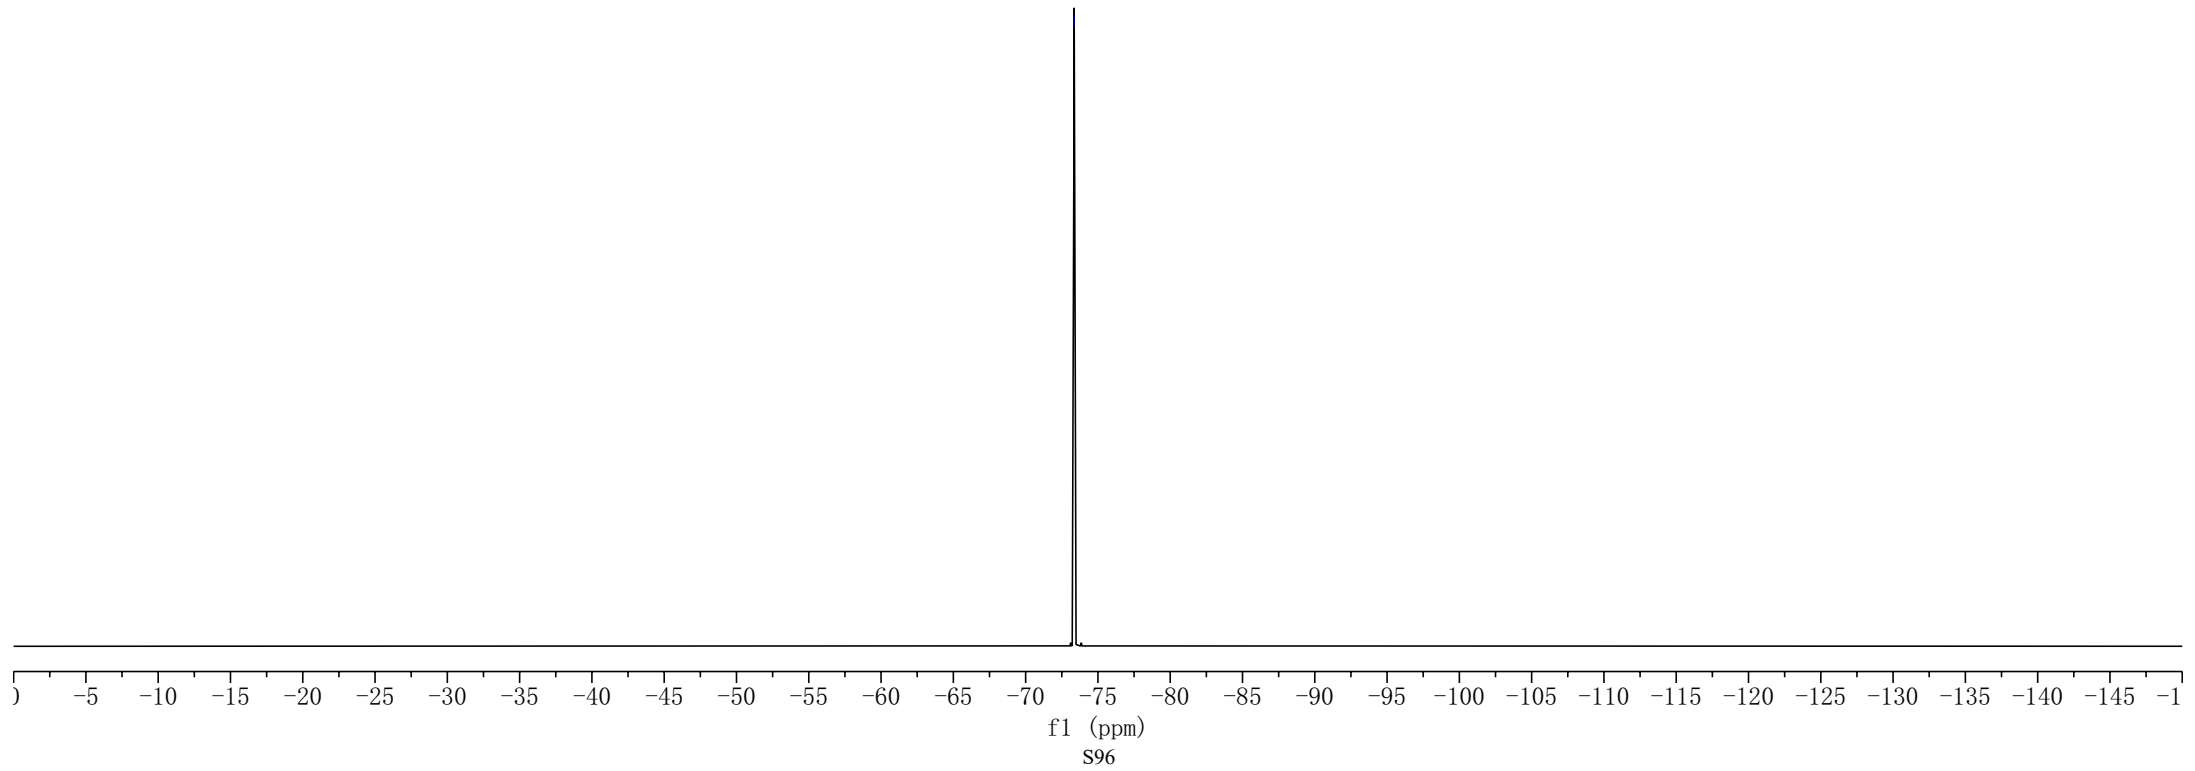



7.70  
7.69  
7.68  
7.67  
7.65  
7.63  
7.33  
7.31  
7.30  
7.29  
7.25  
7.24  
7.23  
7.21  
6.72  
6.71  
6.70  
6.69  
6.39  
6.37  
6.36  
6.34  
6.04

3.78

3.30

1.36

-0.00

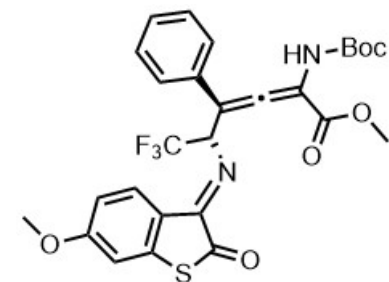

**3ae**

<sup>1</sup>H NMR (400 MHz, CDCl<sub>3</sub>)

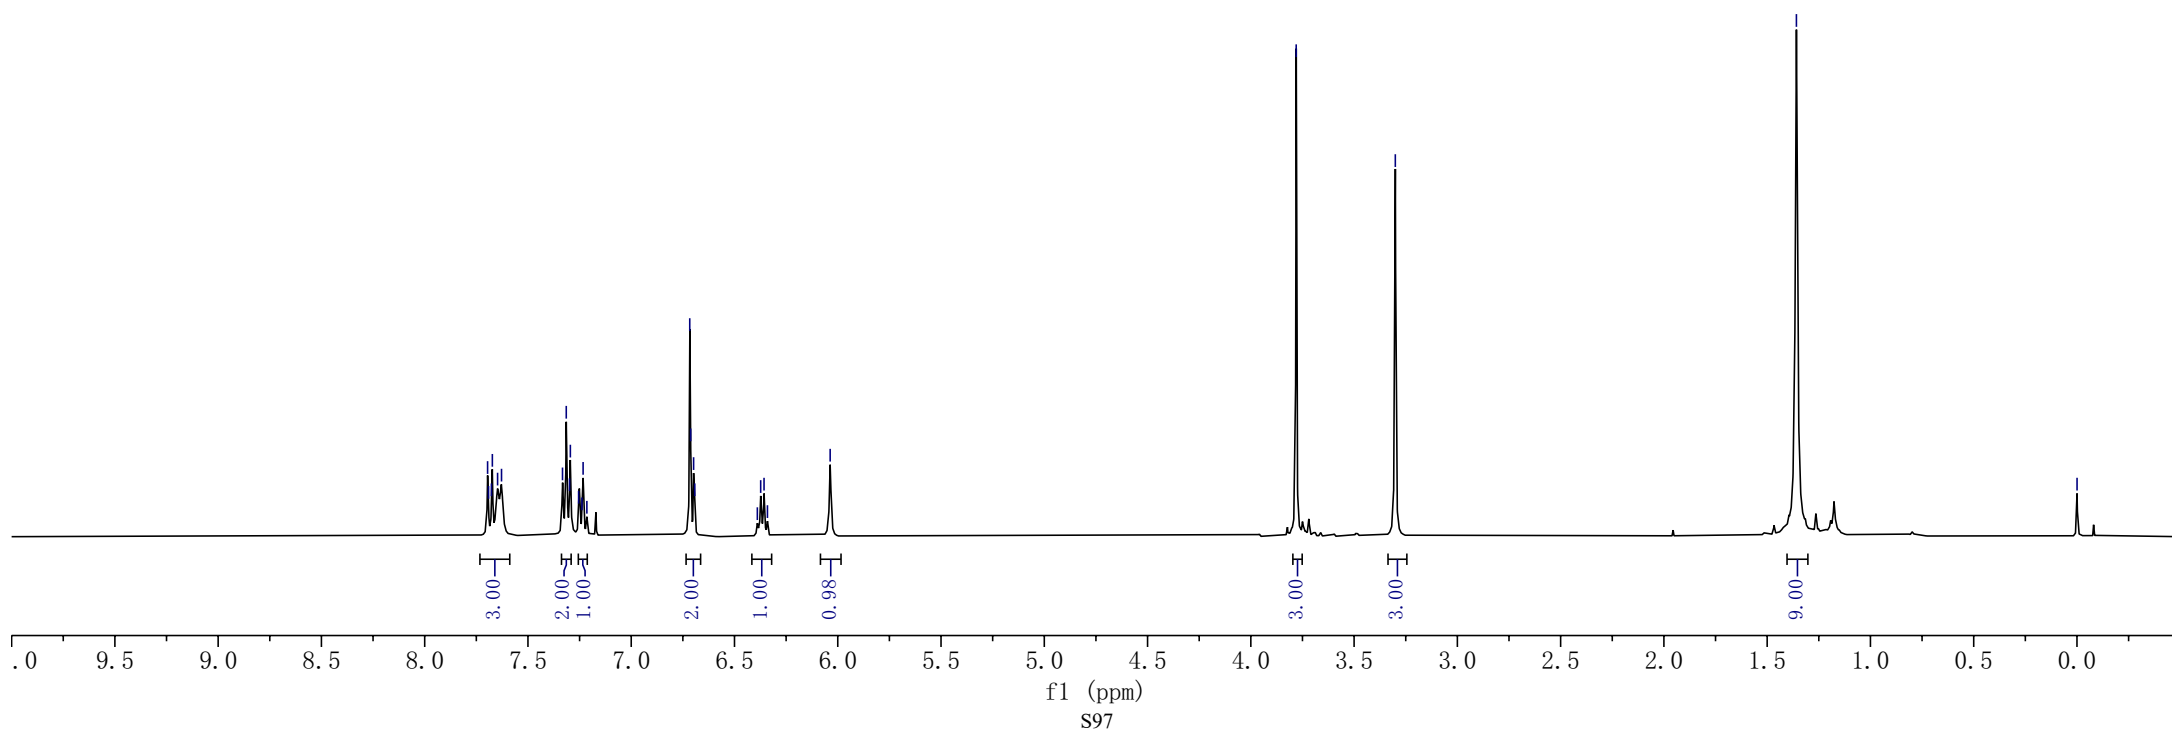

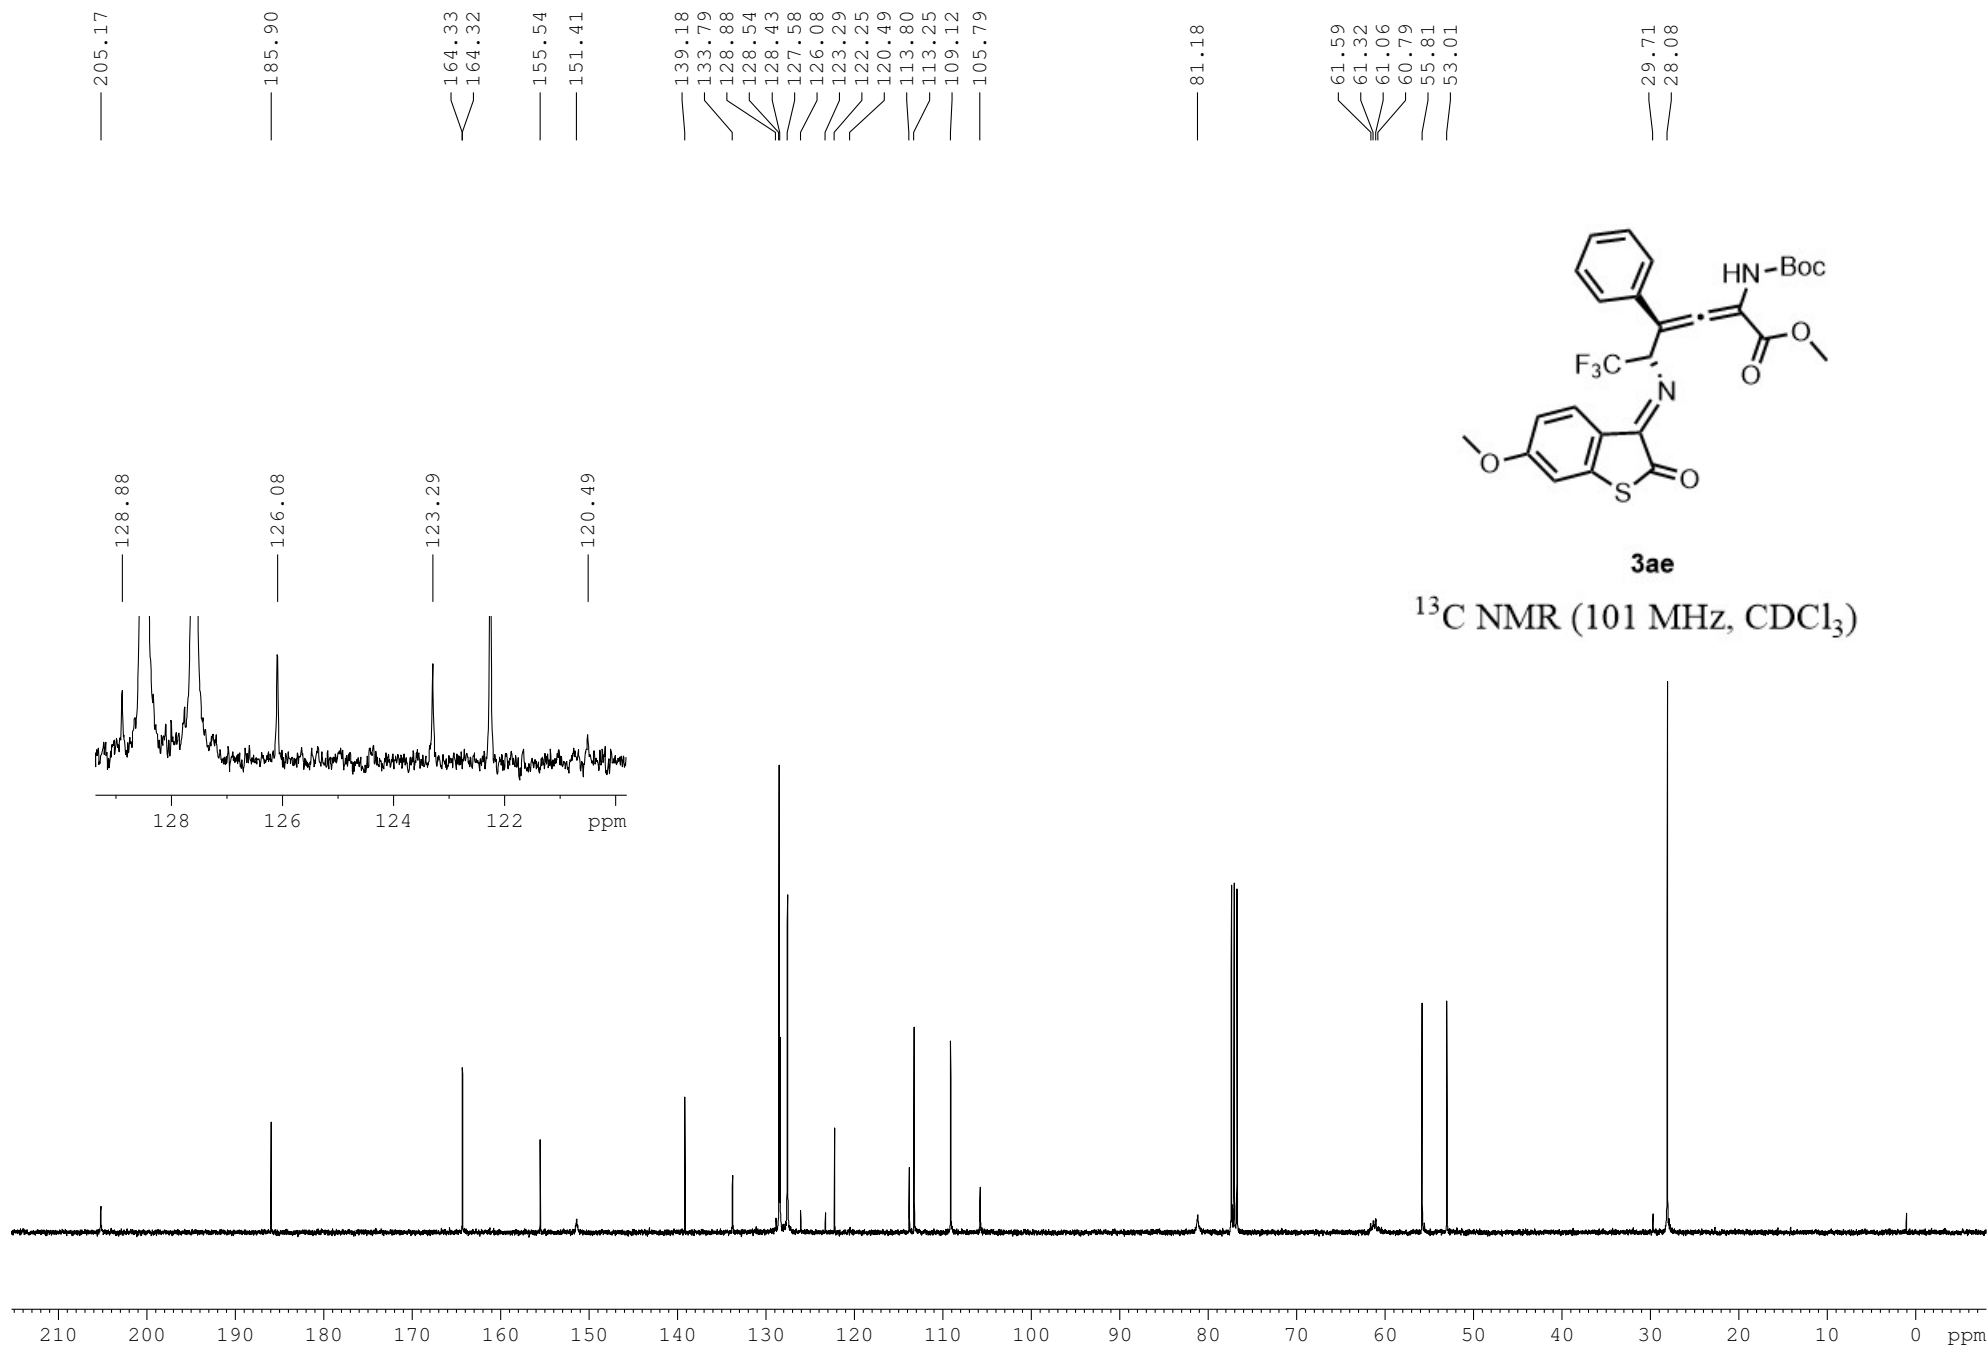

-73.37

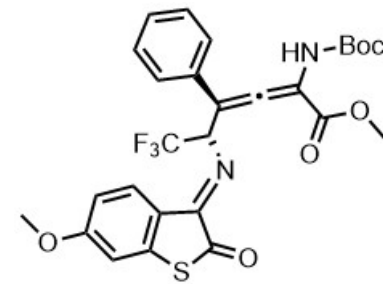

**3ae**

$^{19}\text{F}$  NMR (376 MHz,  $\text{CDCl}_3$ )

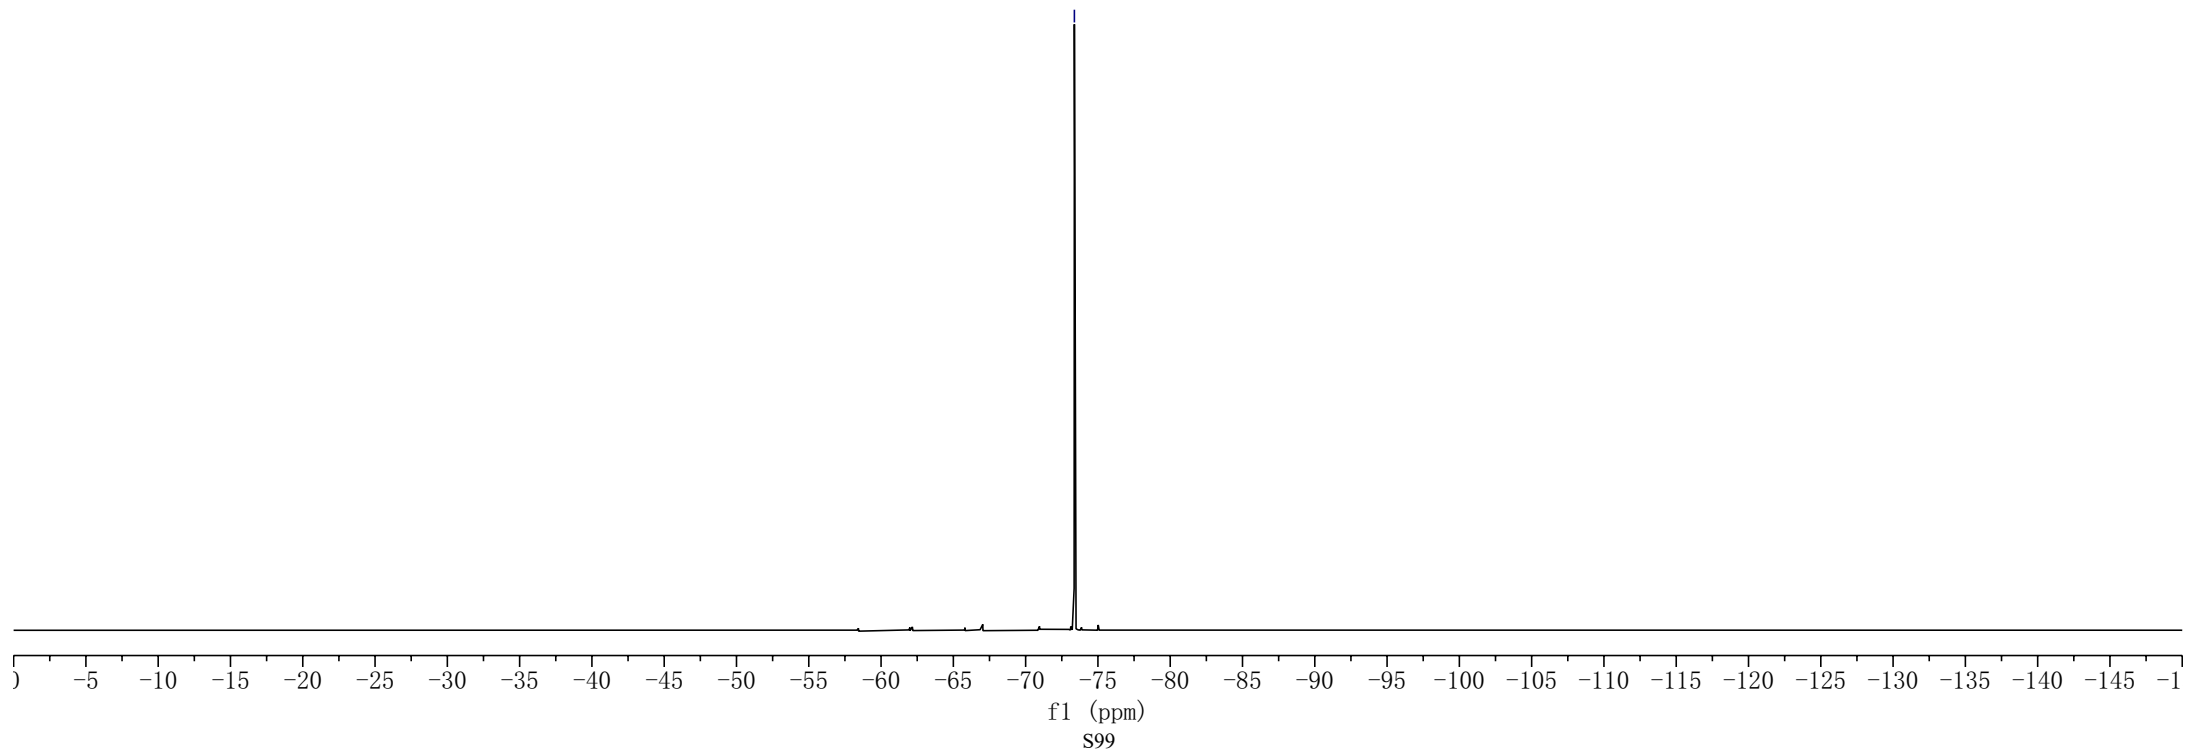

7.80  
7.78  
7.76  
7.64  
7.62  
7.34  
7.33  
7.32  
7.31  
7.27  
7.25  
7.24  
7.23  
6.99  
6.98  
6.97  
6.96  
6.95  
6.94  
6.93  
6.91  
6.39  
6.38  
6.36  
6.34  
6.03

—3.32

—1.37

—0.00

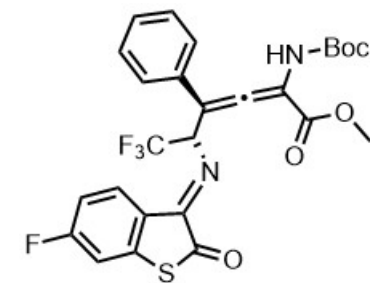

**3af**

<sup>1</sup>H NMR (400 MHz, CDCl<sub>3</sub>)

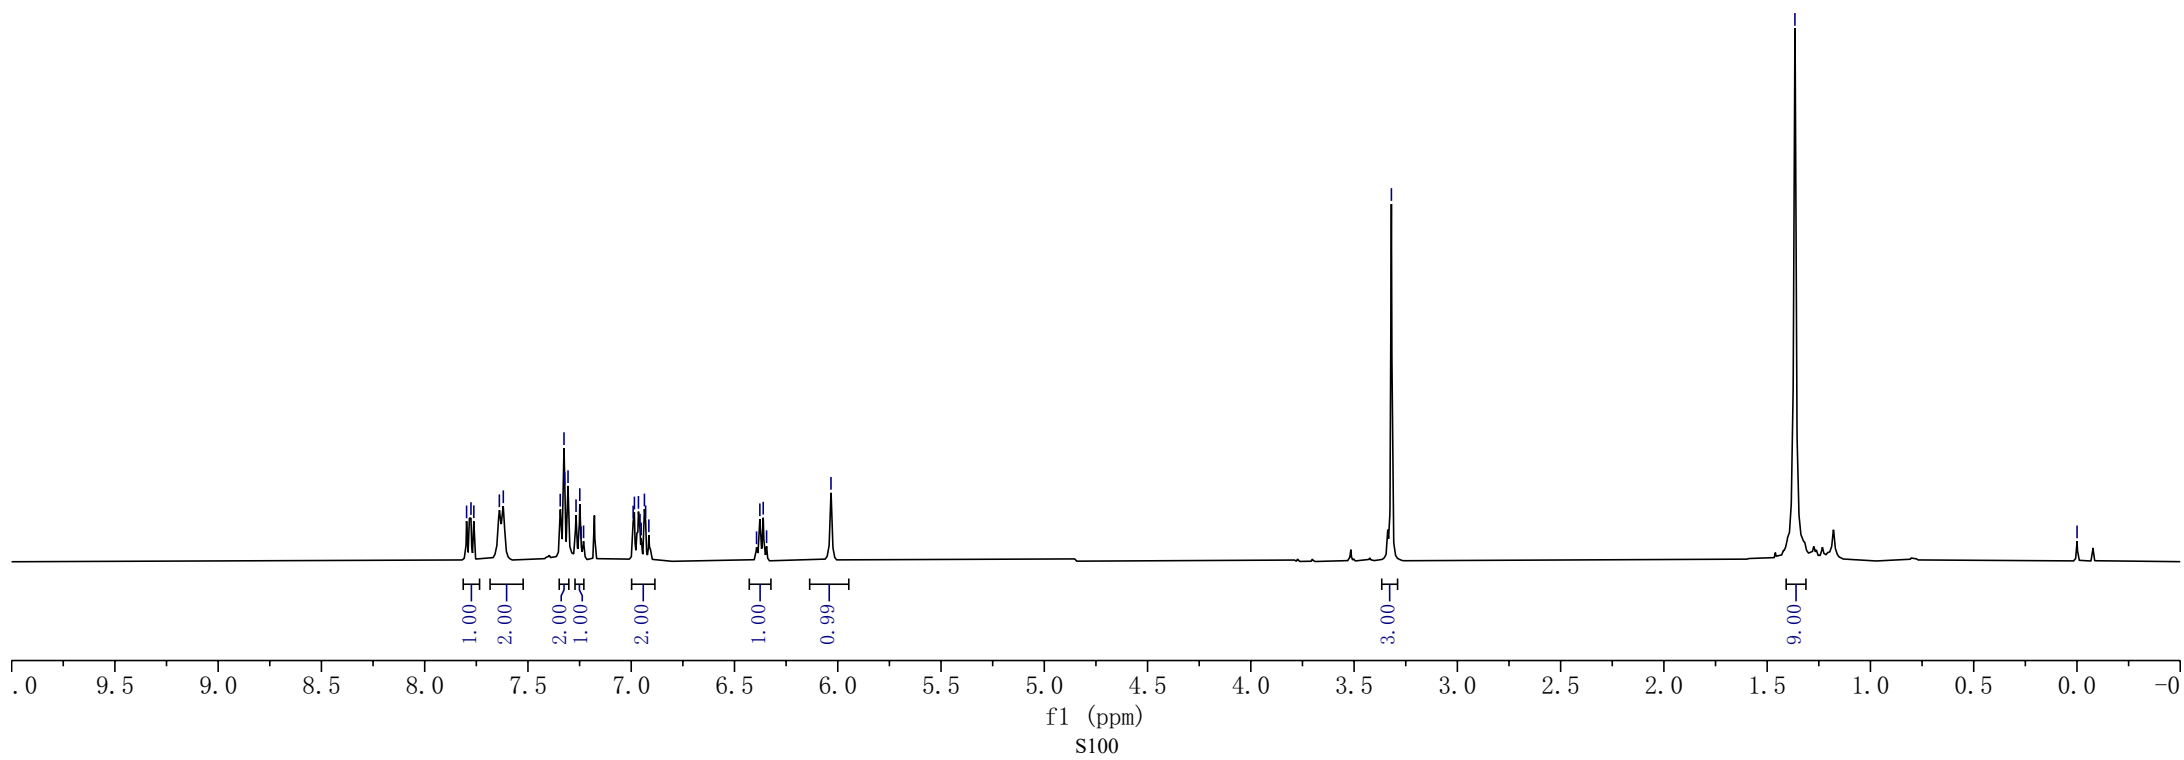

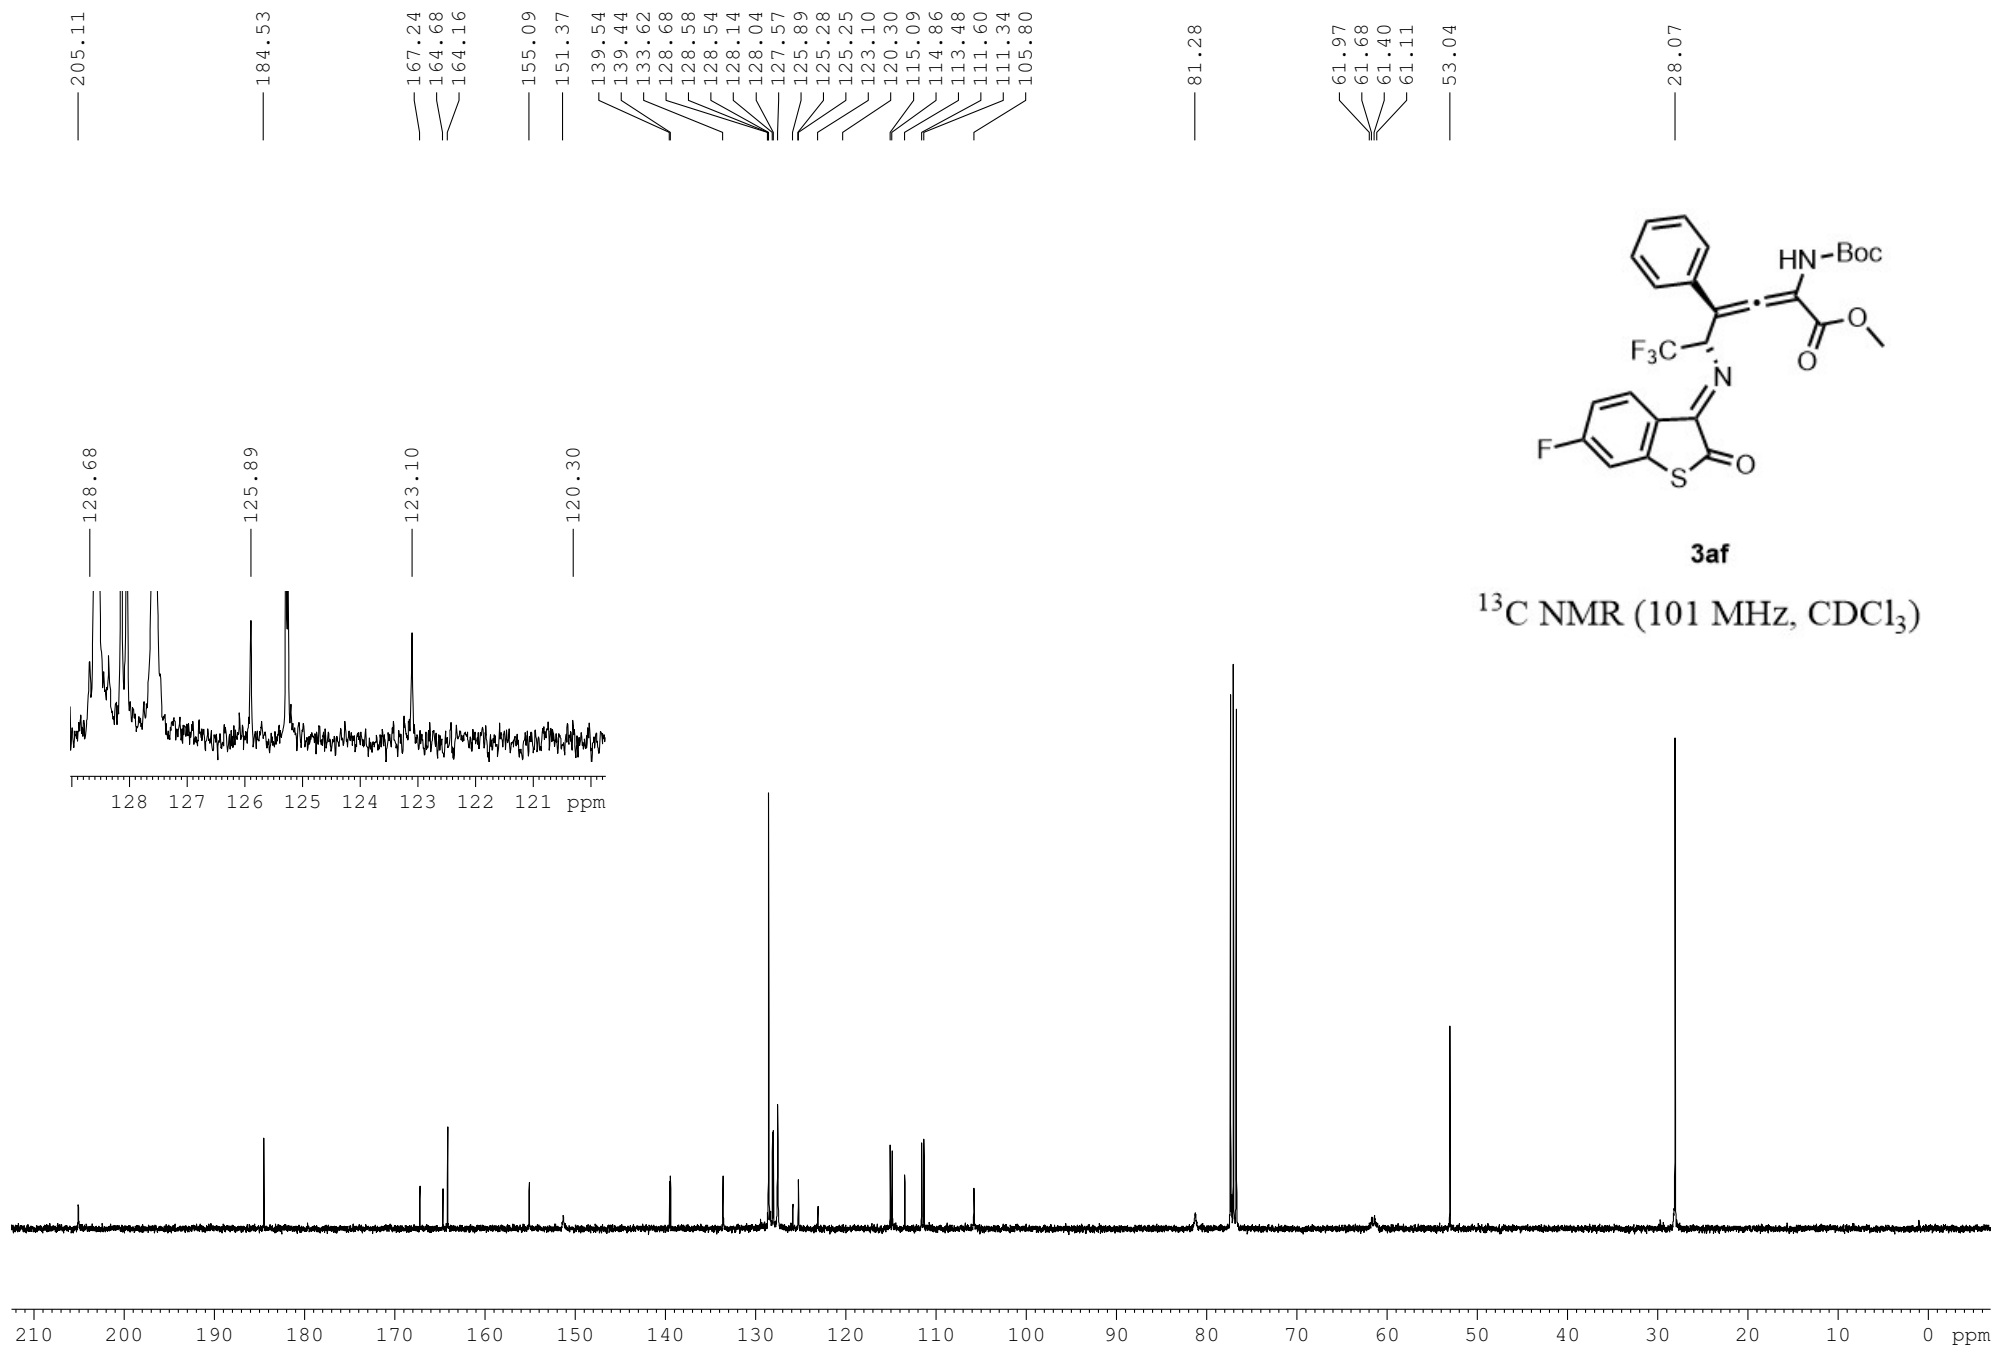

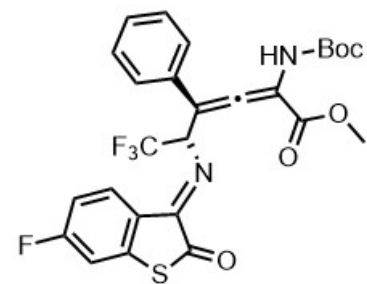

**3af**

$^{19}\text{F}$  NMR (376 MHz,  $\text{CDCl}_3$ )

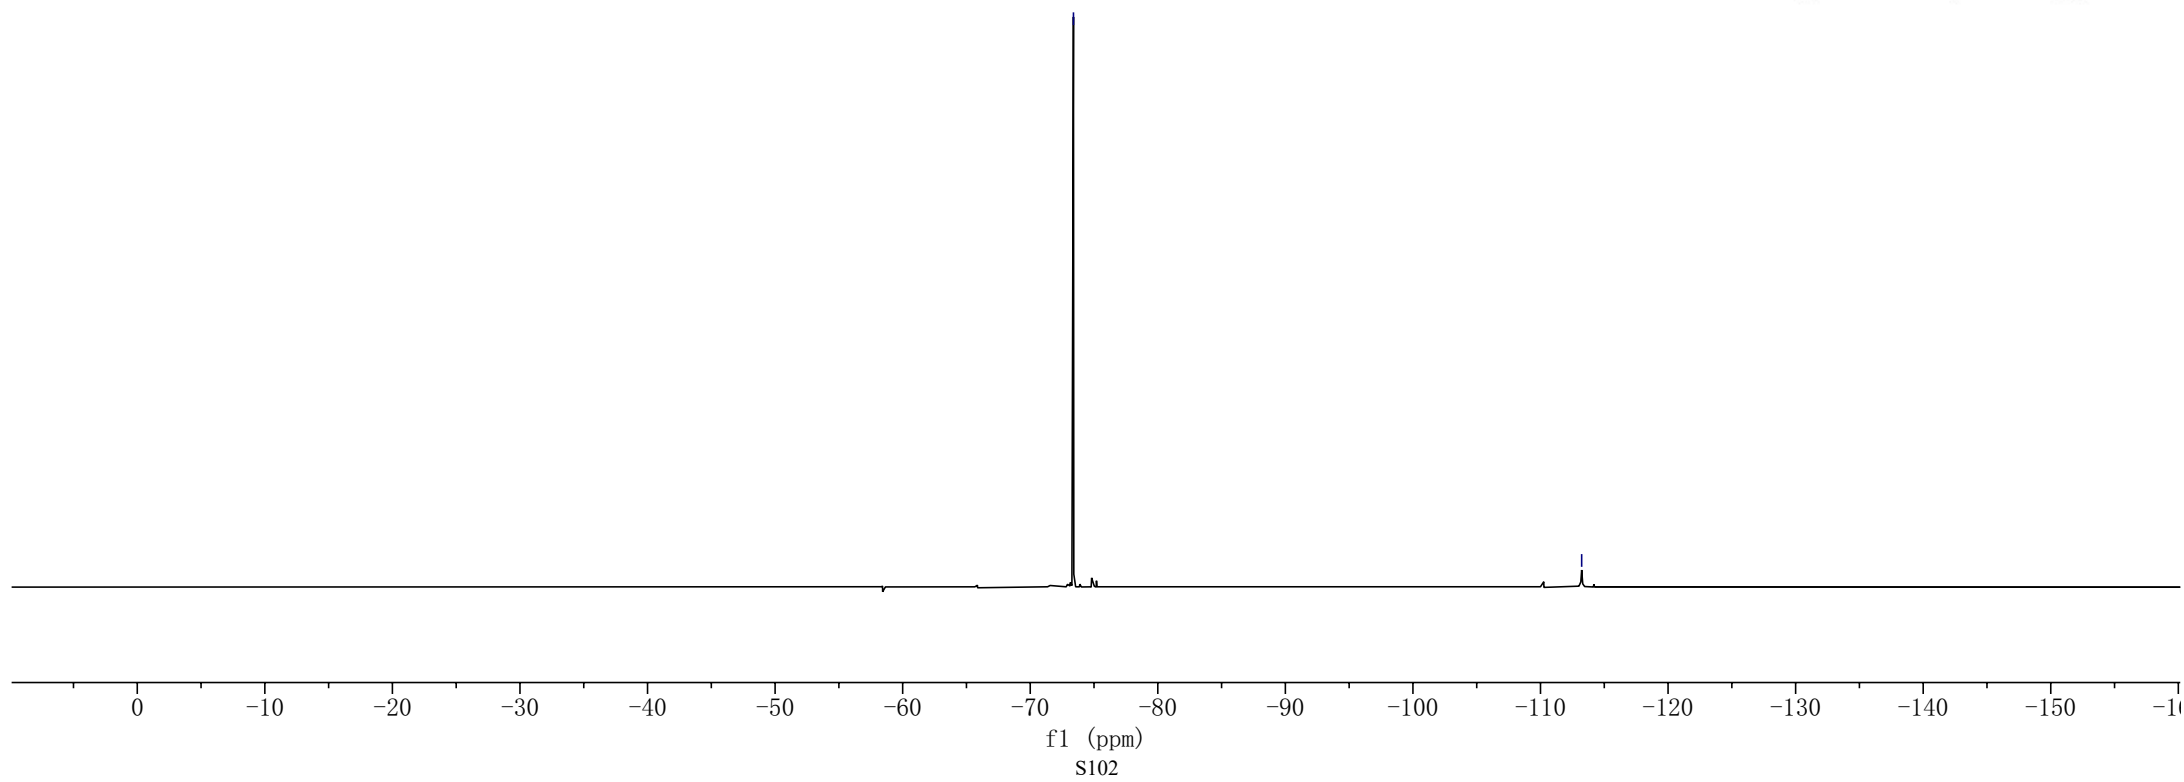

7.66  
7.64  
7.40  
7.34  
7.32  
7.30  
7.26  
7.25  
7.24  
7.23  
7.22  
7.07  
6.41  
6.39  
6.37  
6.36  
6.04

3.27

2.27  
2.15

1.36

-0.00

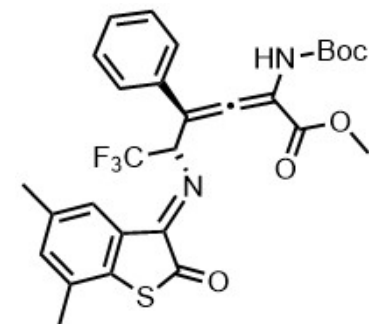

**3ag**

<sup>1</sup>H NMR (400 MHz, CDCl<sub>3</sub>)

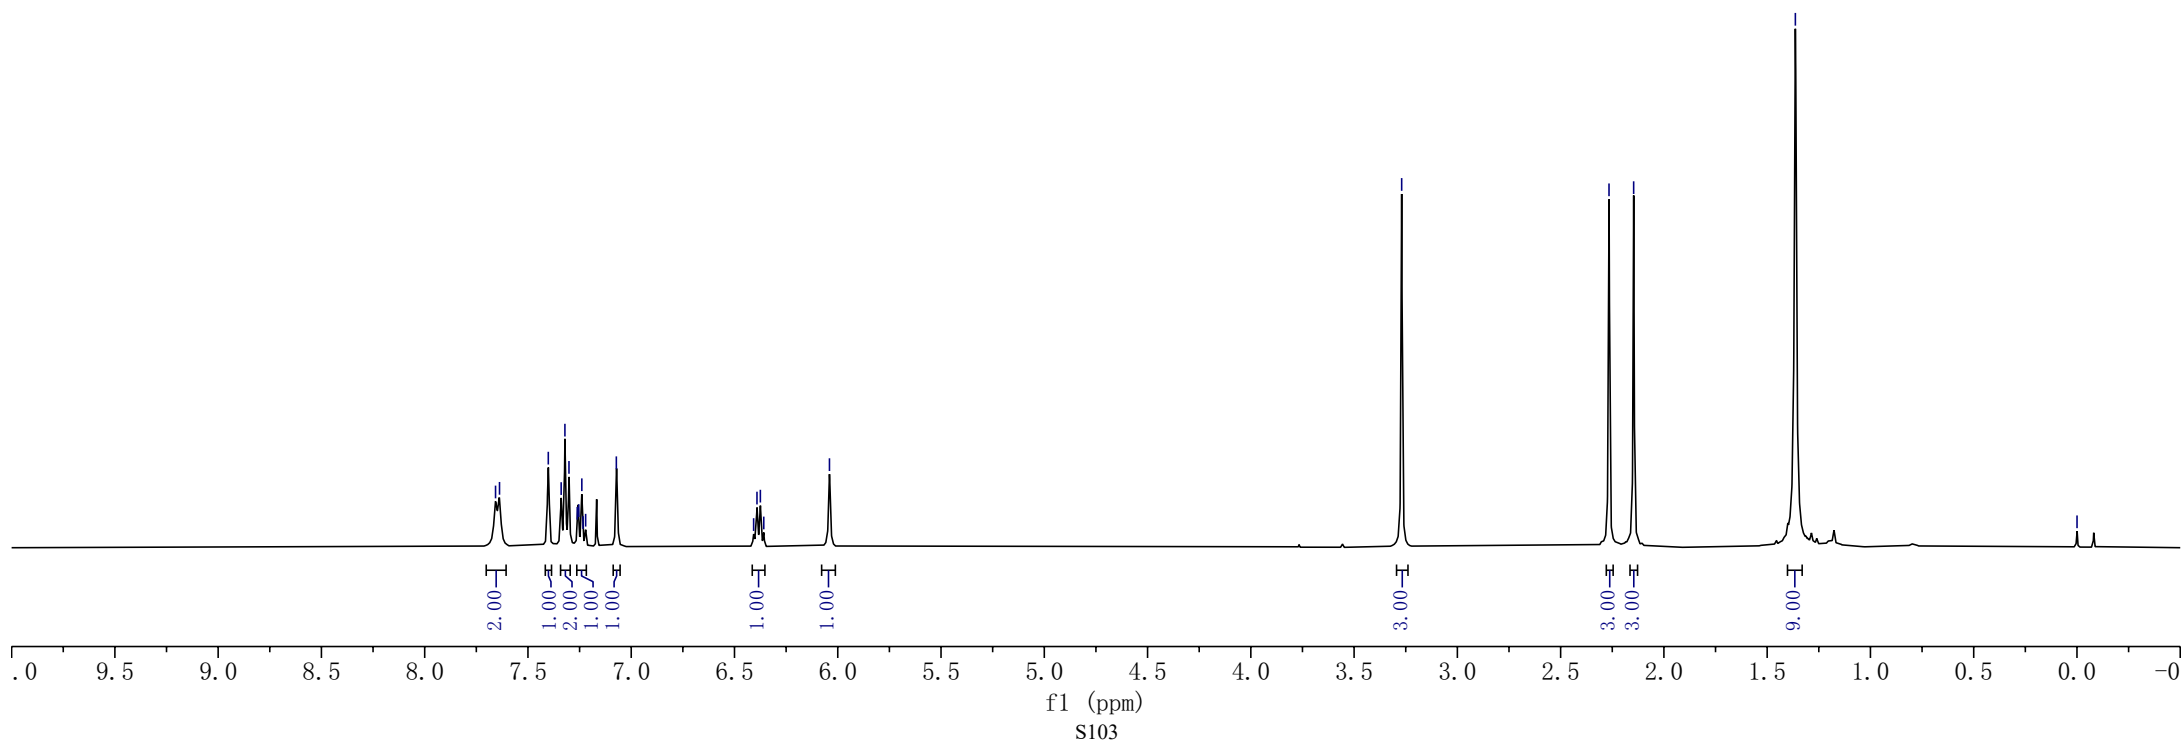

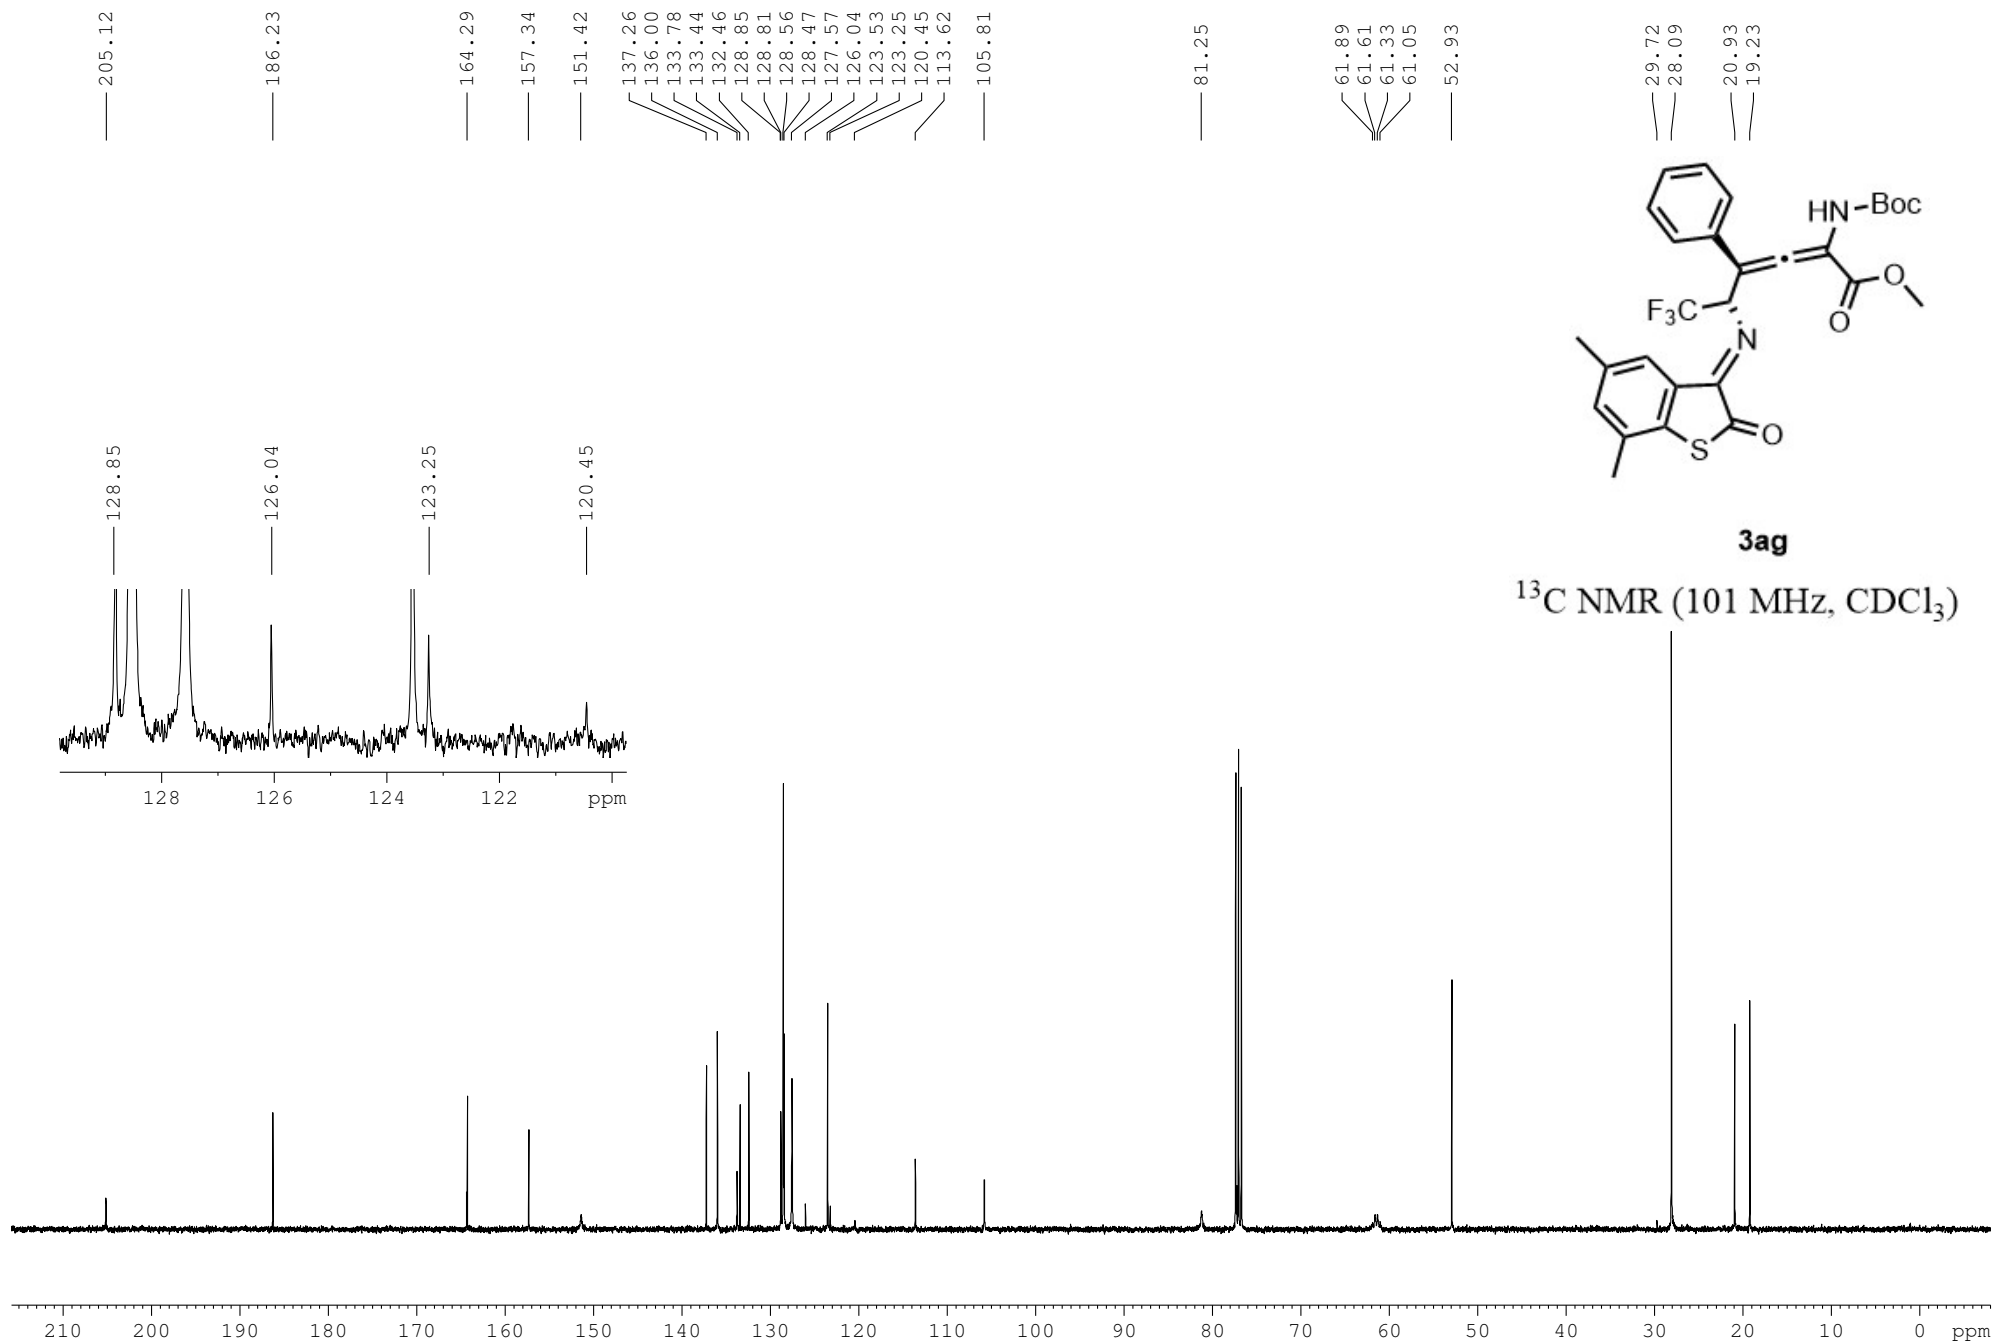



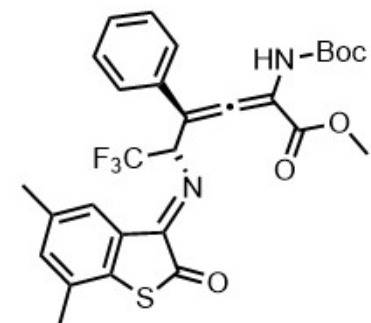

**3ag**

$^{19}\text{F}$  NMR (376 MHz,  $\text{CDCl}_3$ )

—73.37

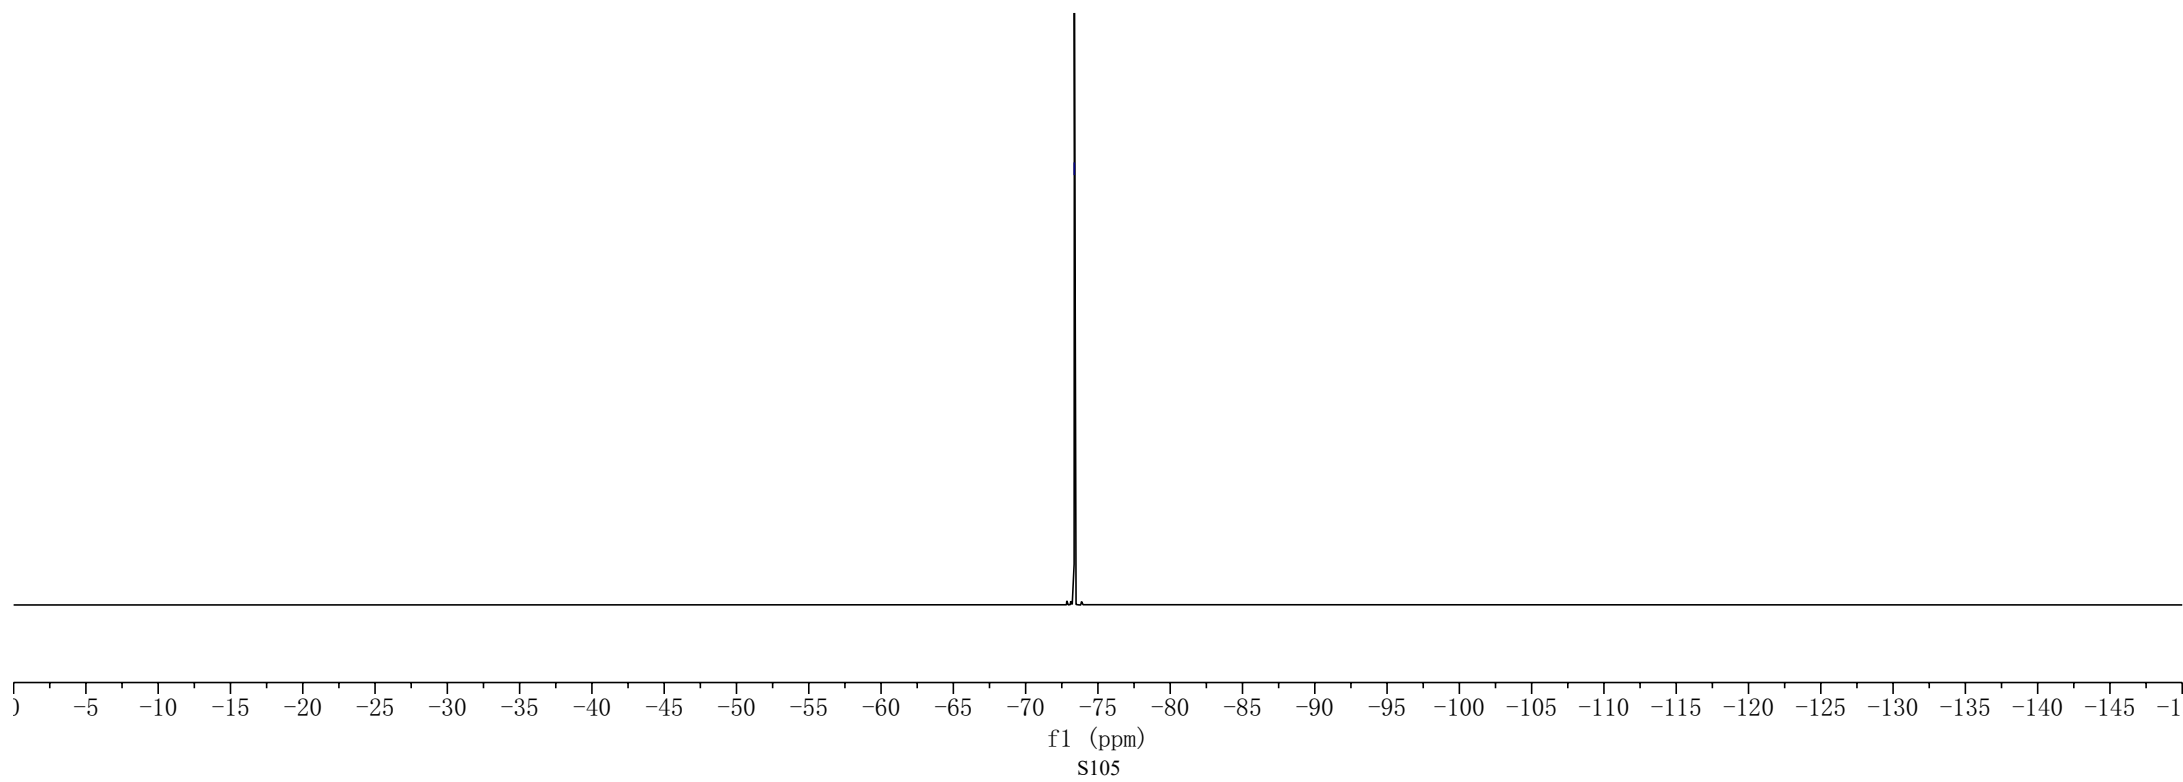

8.19  
8.17  
7.77  
7.75  
7.70  
7.69  
7.47  
7.45  
7.44  
7.35  
7.34  
7.32  
7.27  
7.26  
7.24  
7.22  
7.21  
7.19  
7.18  
6.71  
6.69  
6.66  
6.02

— 3.17

— 2.62

— 1.36

— -0.00

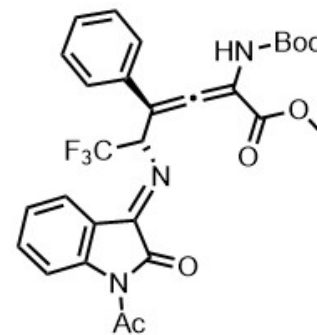

**3ah**

<sup>1</sup>H NMR (400 MHz, CDCl<sub>3</sub>)

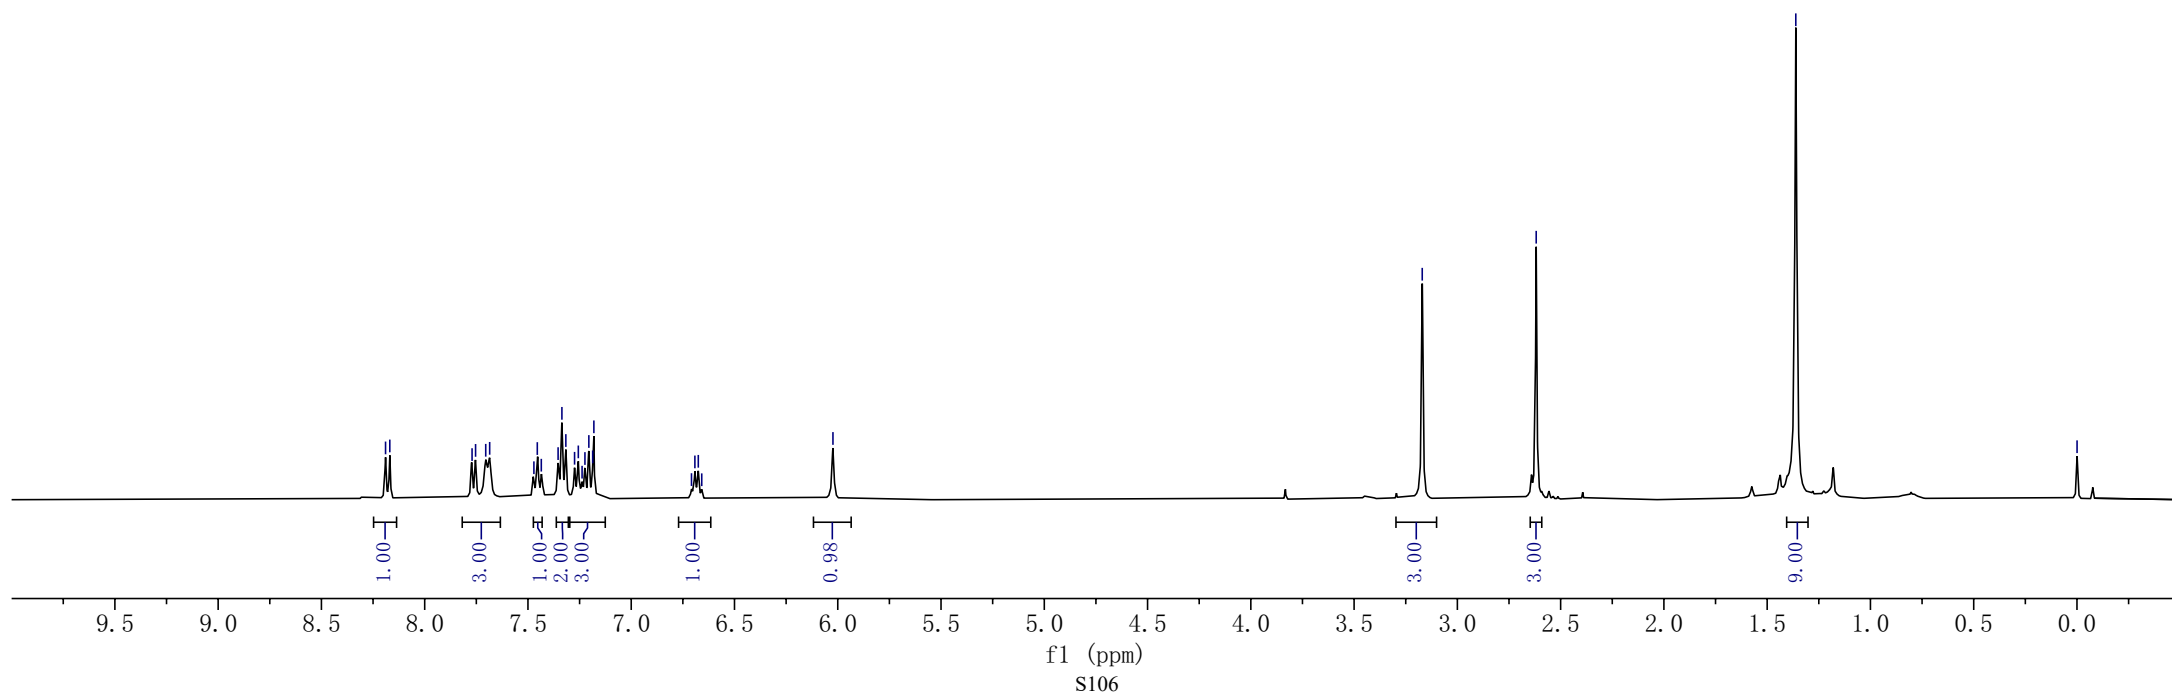

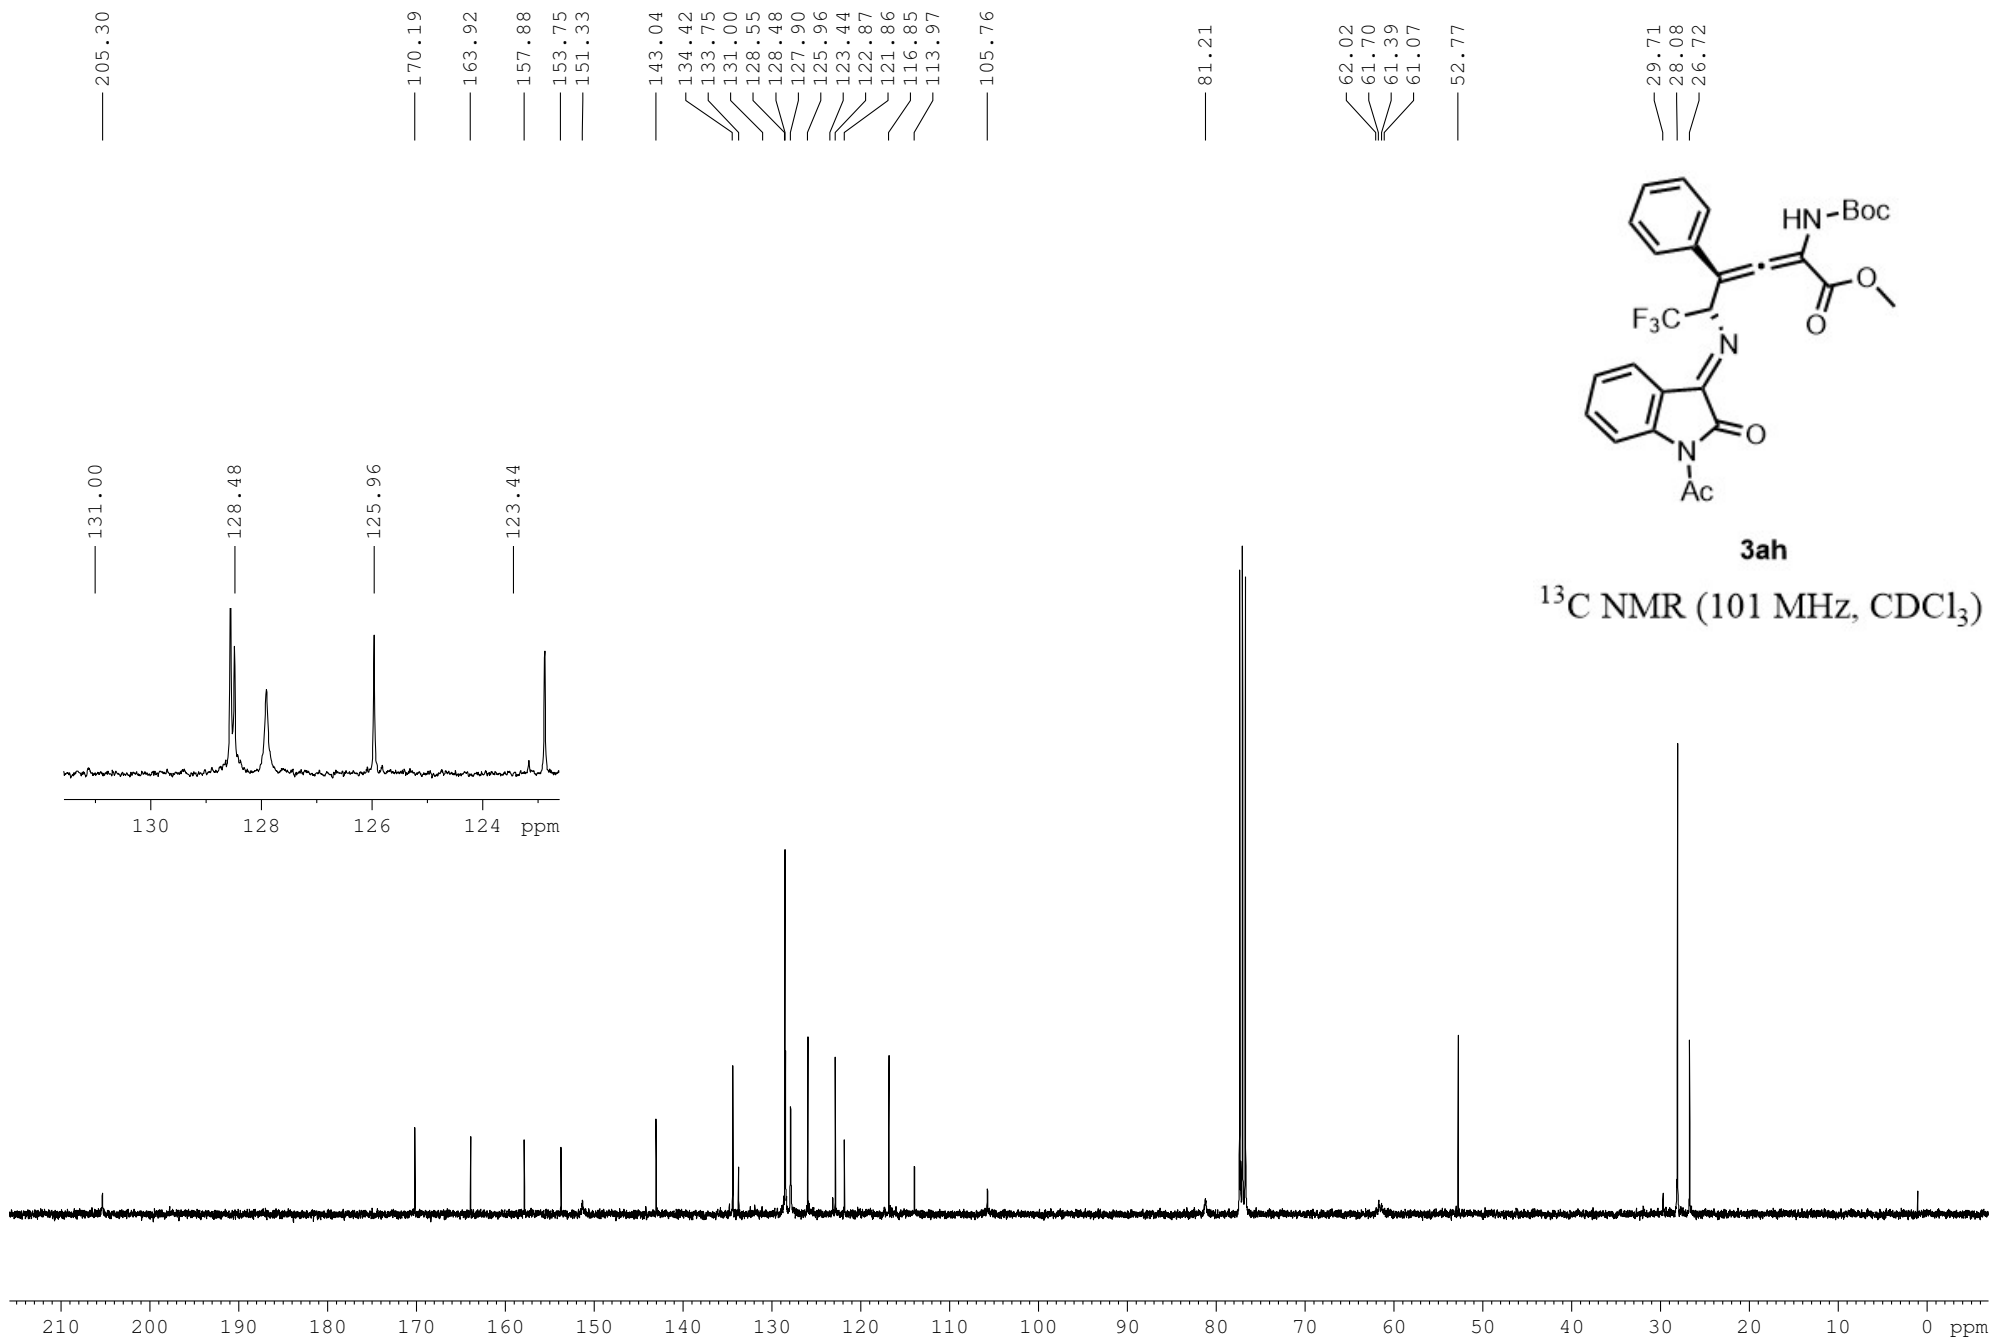

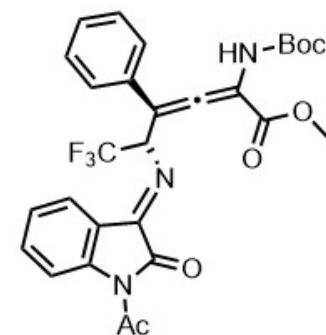

**3ah**

<sup>19</sup>F NMR (376 MHz, CDCl<sub>3</sub>)

-72.91

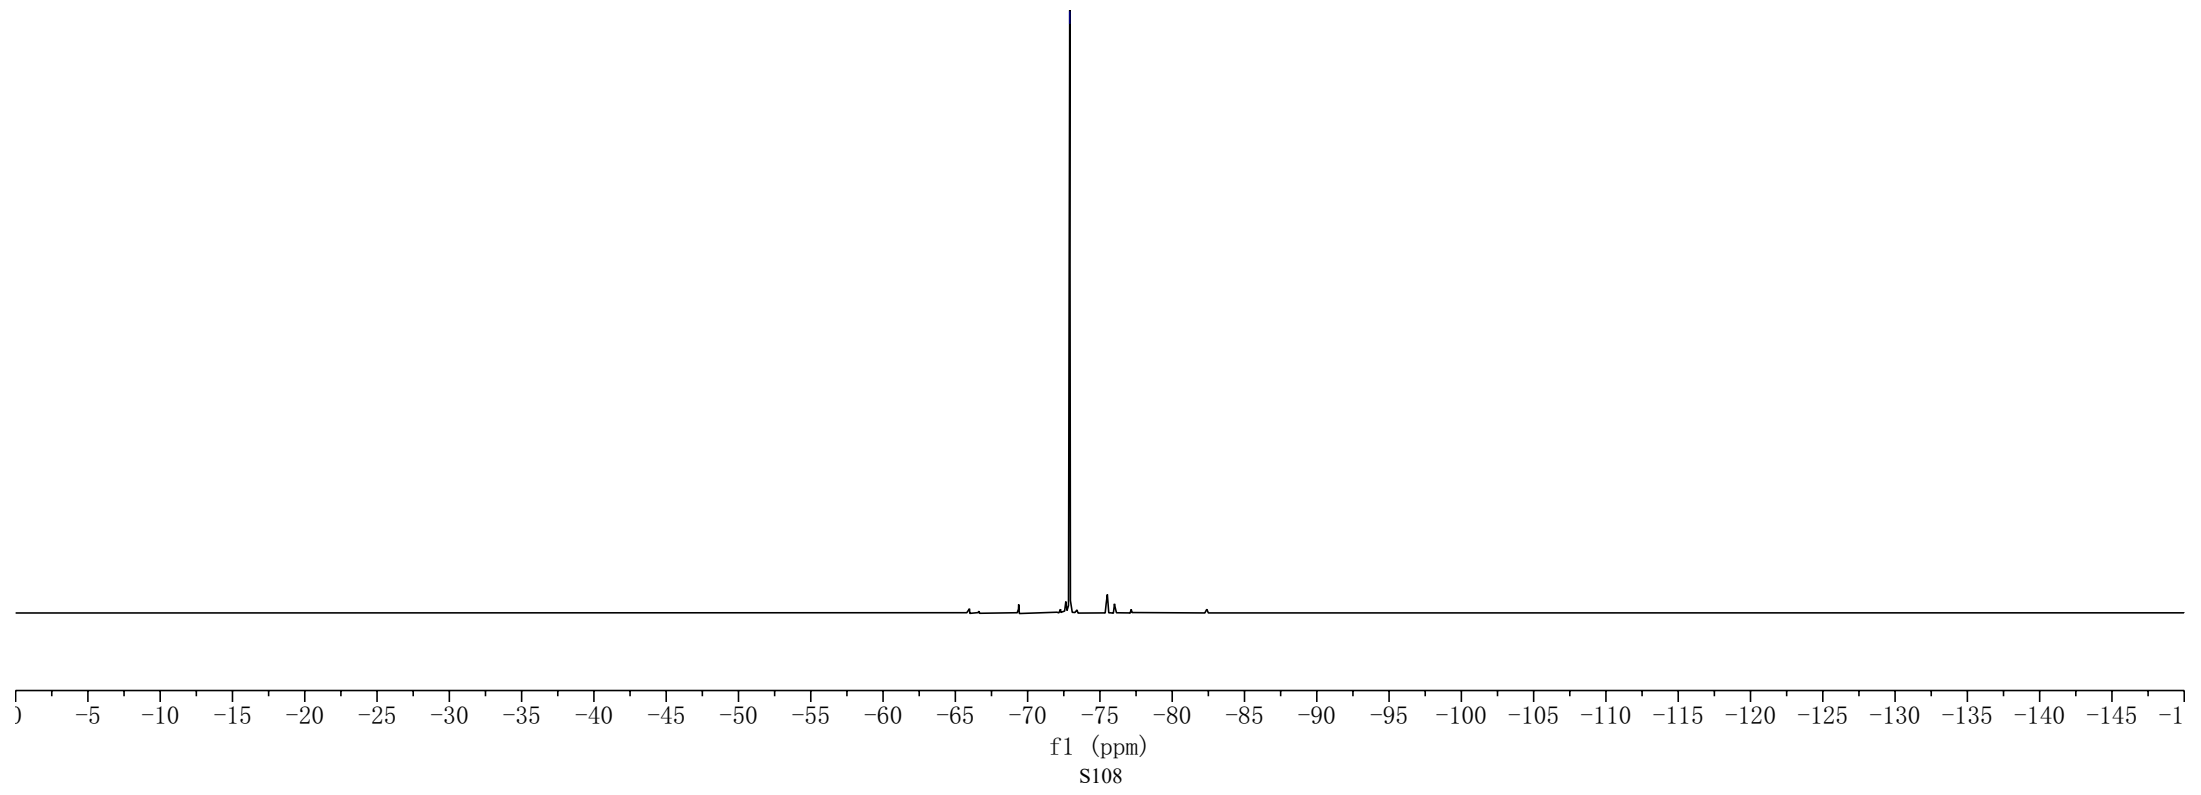

8.14  
8.12  
7.70  
7.68  
7.34  
7.33  
7.32  
7.31  
7.30  
7.29  
7.25  
7.23  
7.21  
7.18  
7.17  
7.16  
6.88  
6.86  
6.84  
6.83  
6.06

3.22

2.60

1.33

-0.00

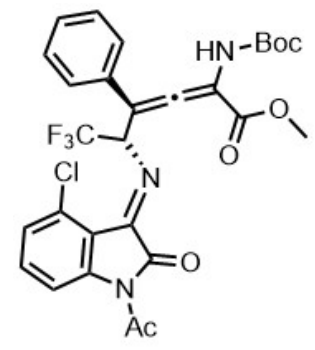

3ai

<sup>1</sup>H NMR (400 MHz, CDCl<sub>3</sub>)

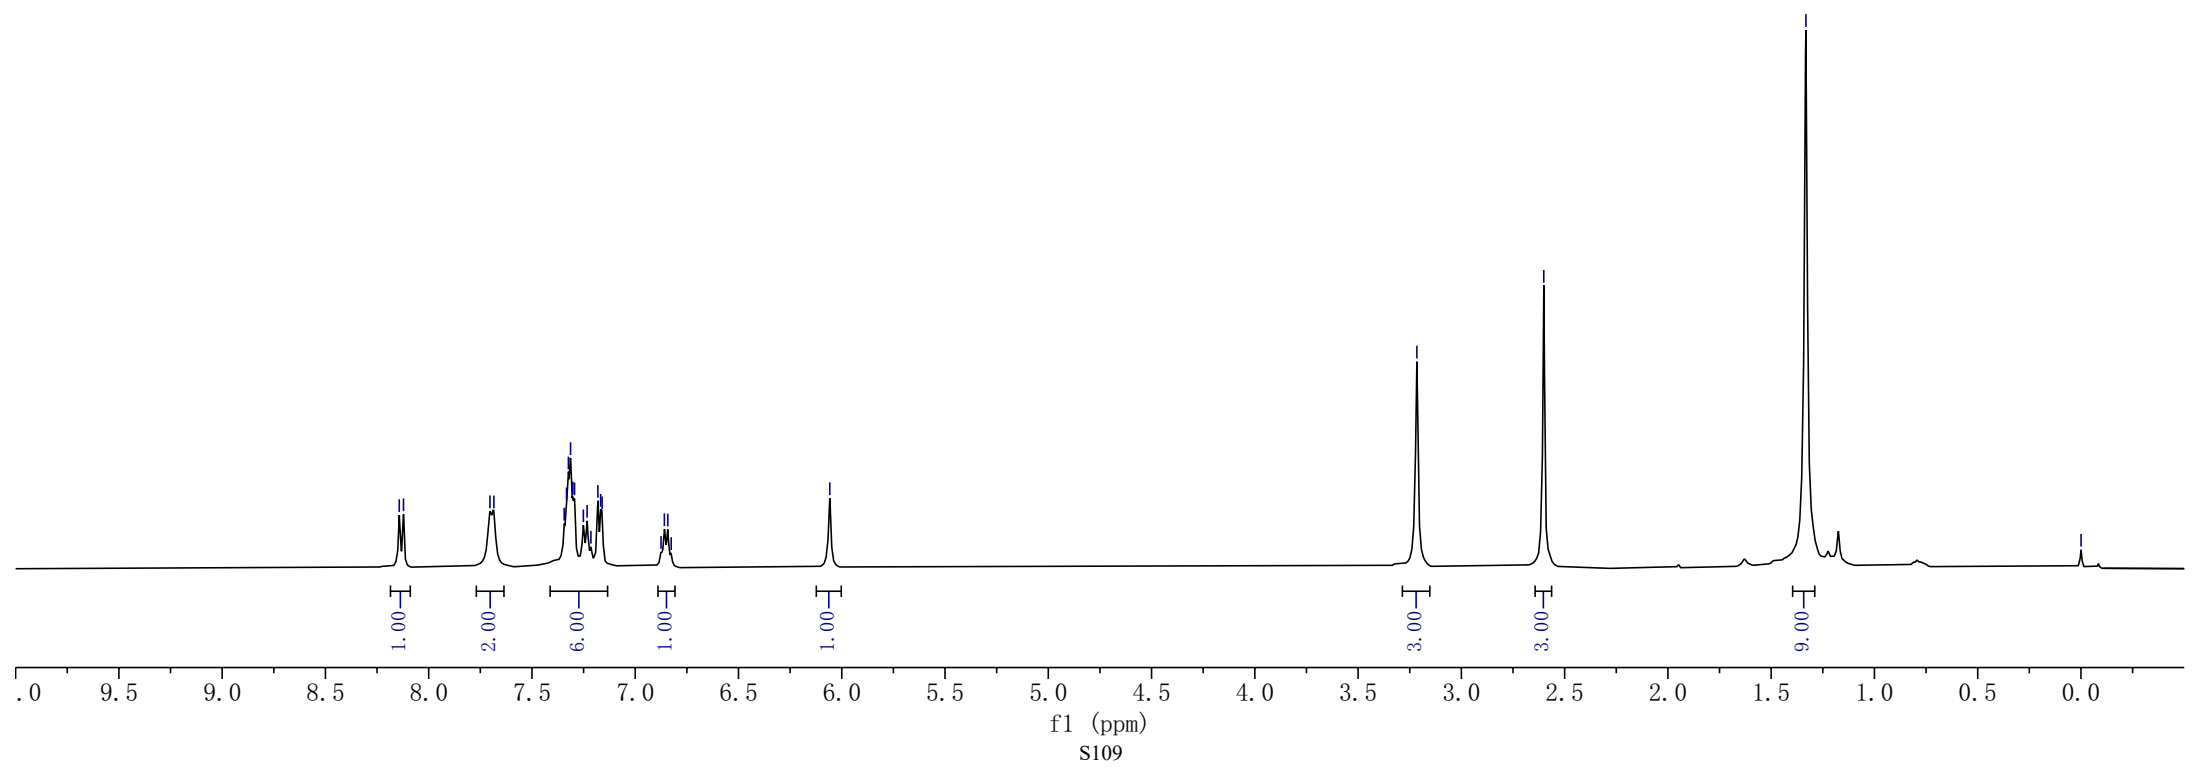

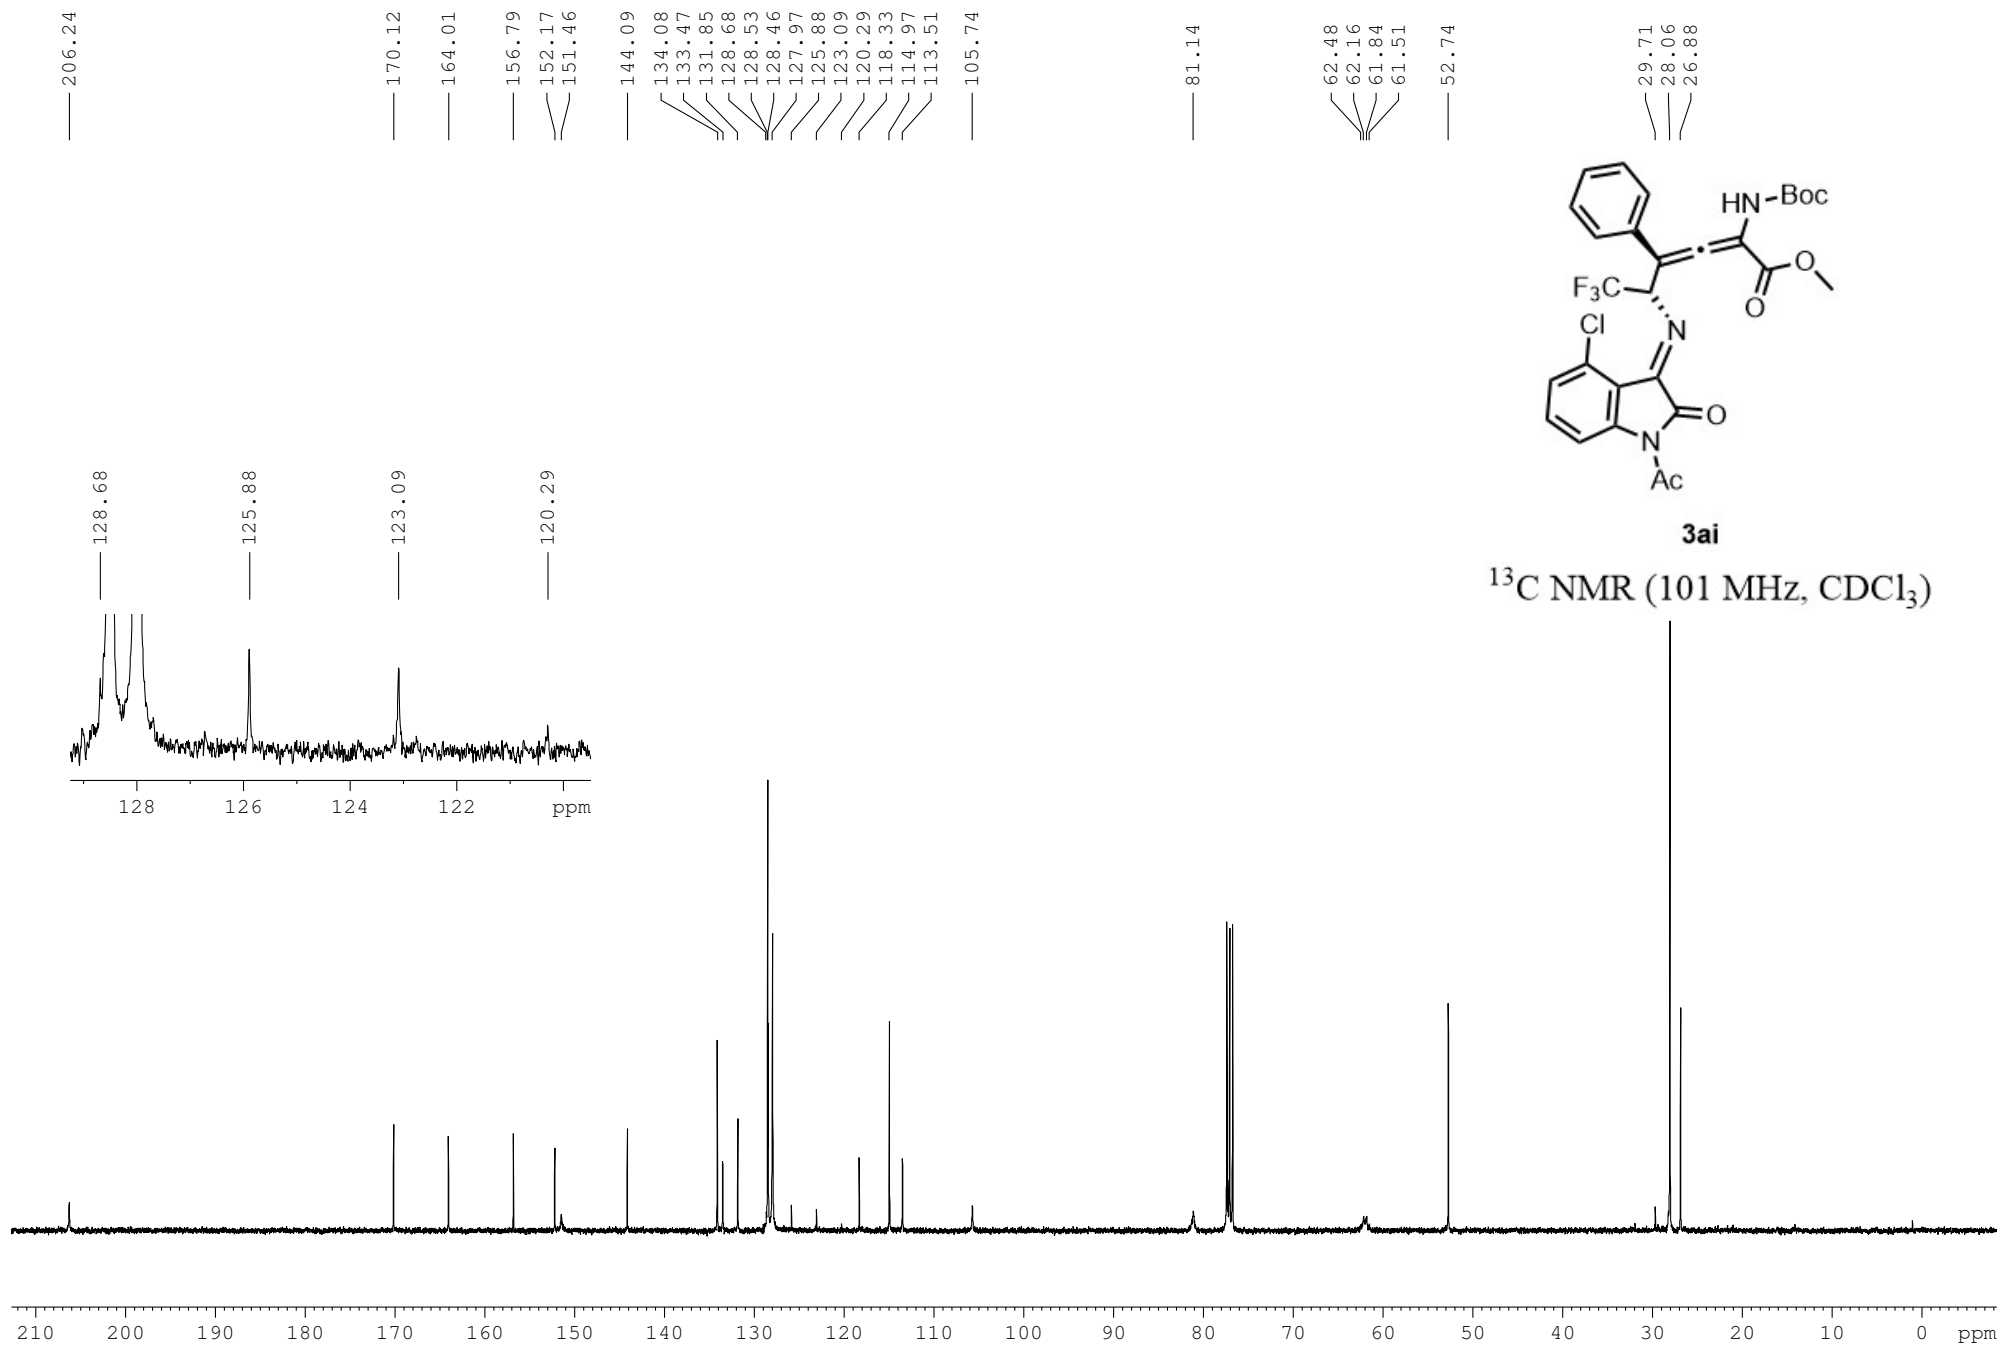

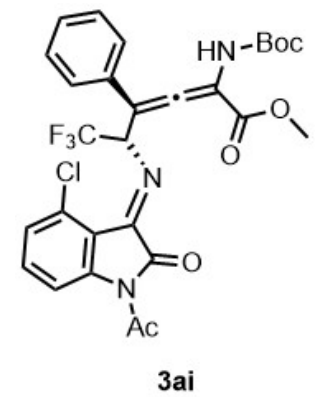

<sup>19</sup>F NMR (376 MHz, CDCl<sub>3</sub>)

-72.89

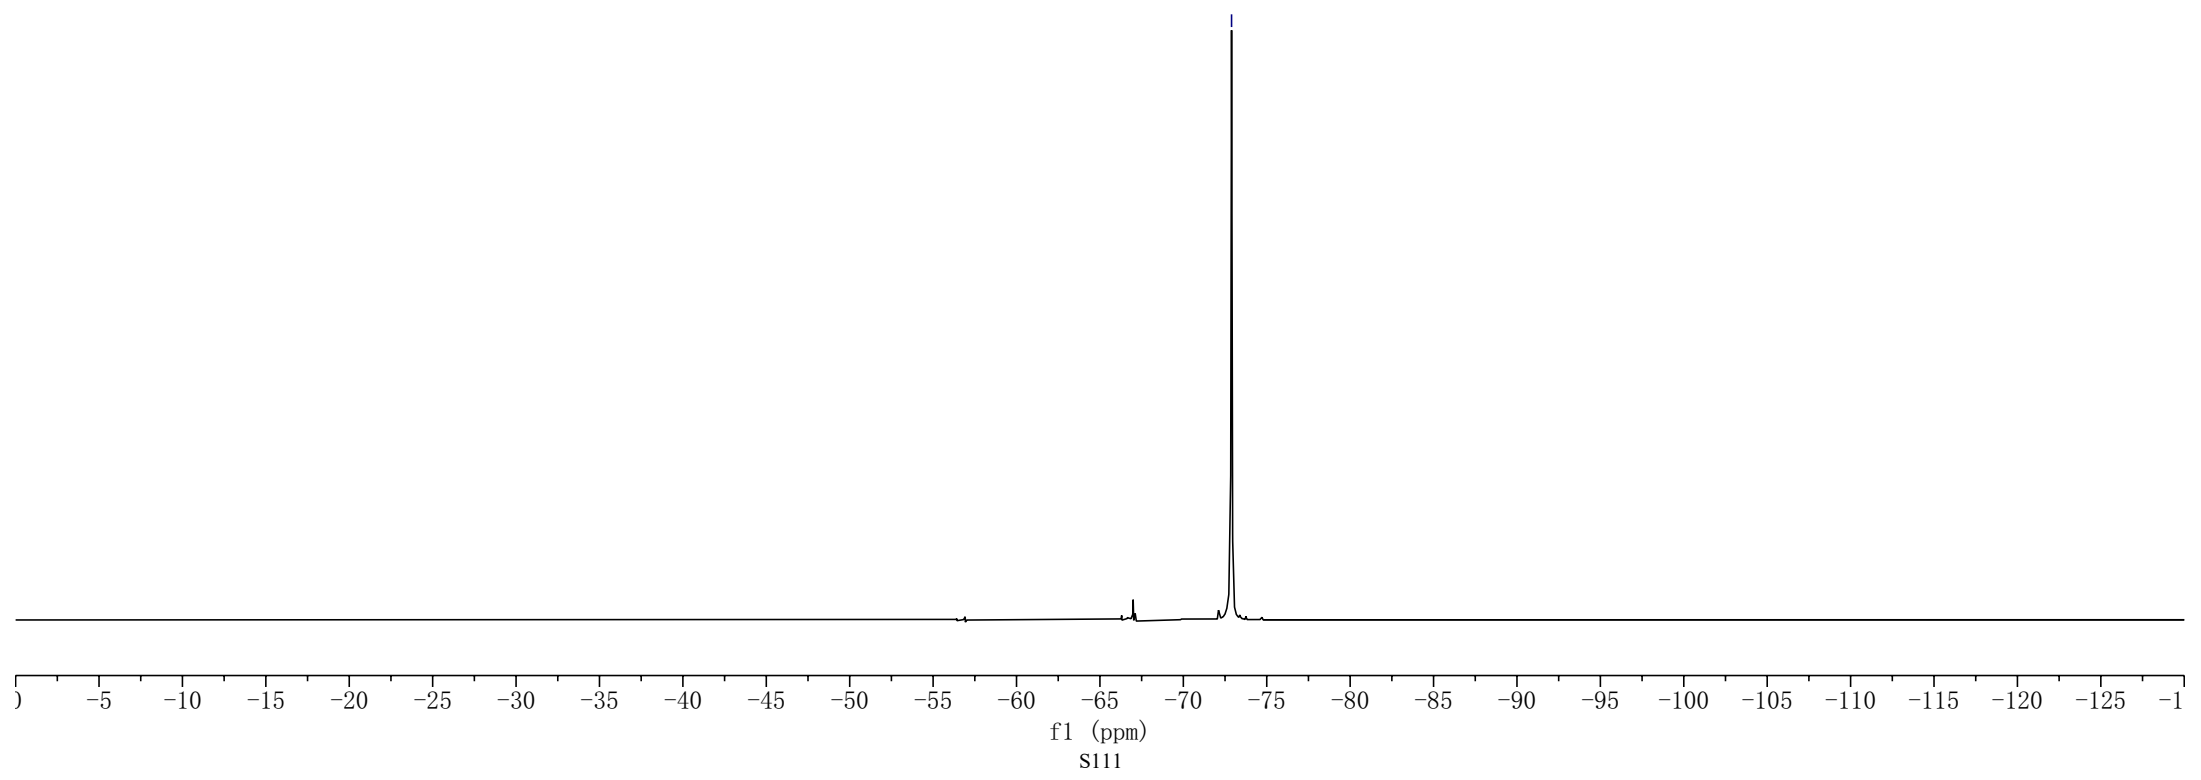

8.29  
8.28  
8.27  
8.26  
7.77  
7.75  
7.55  
7.54  
7.53  
7.52  
7.43  
7.41  
7.39  
7.35  
7.34  
7.33  
7.32  
7.31  
7.25  
7.23  
7.21  
7.20  
6.76  
6.74  
6.72  
6.71

6.11

3.31

2.68

1.44

-0.00

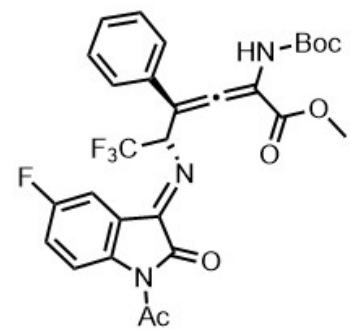

3aj

<sup>1</sup>H NMR (400 MHz, CDCl<sub>3</sub>)

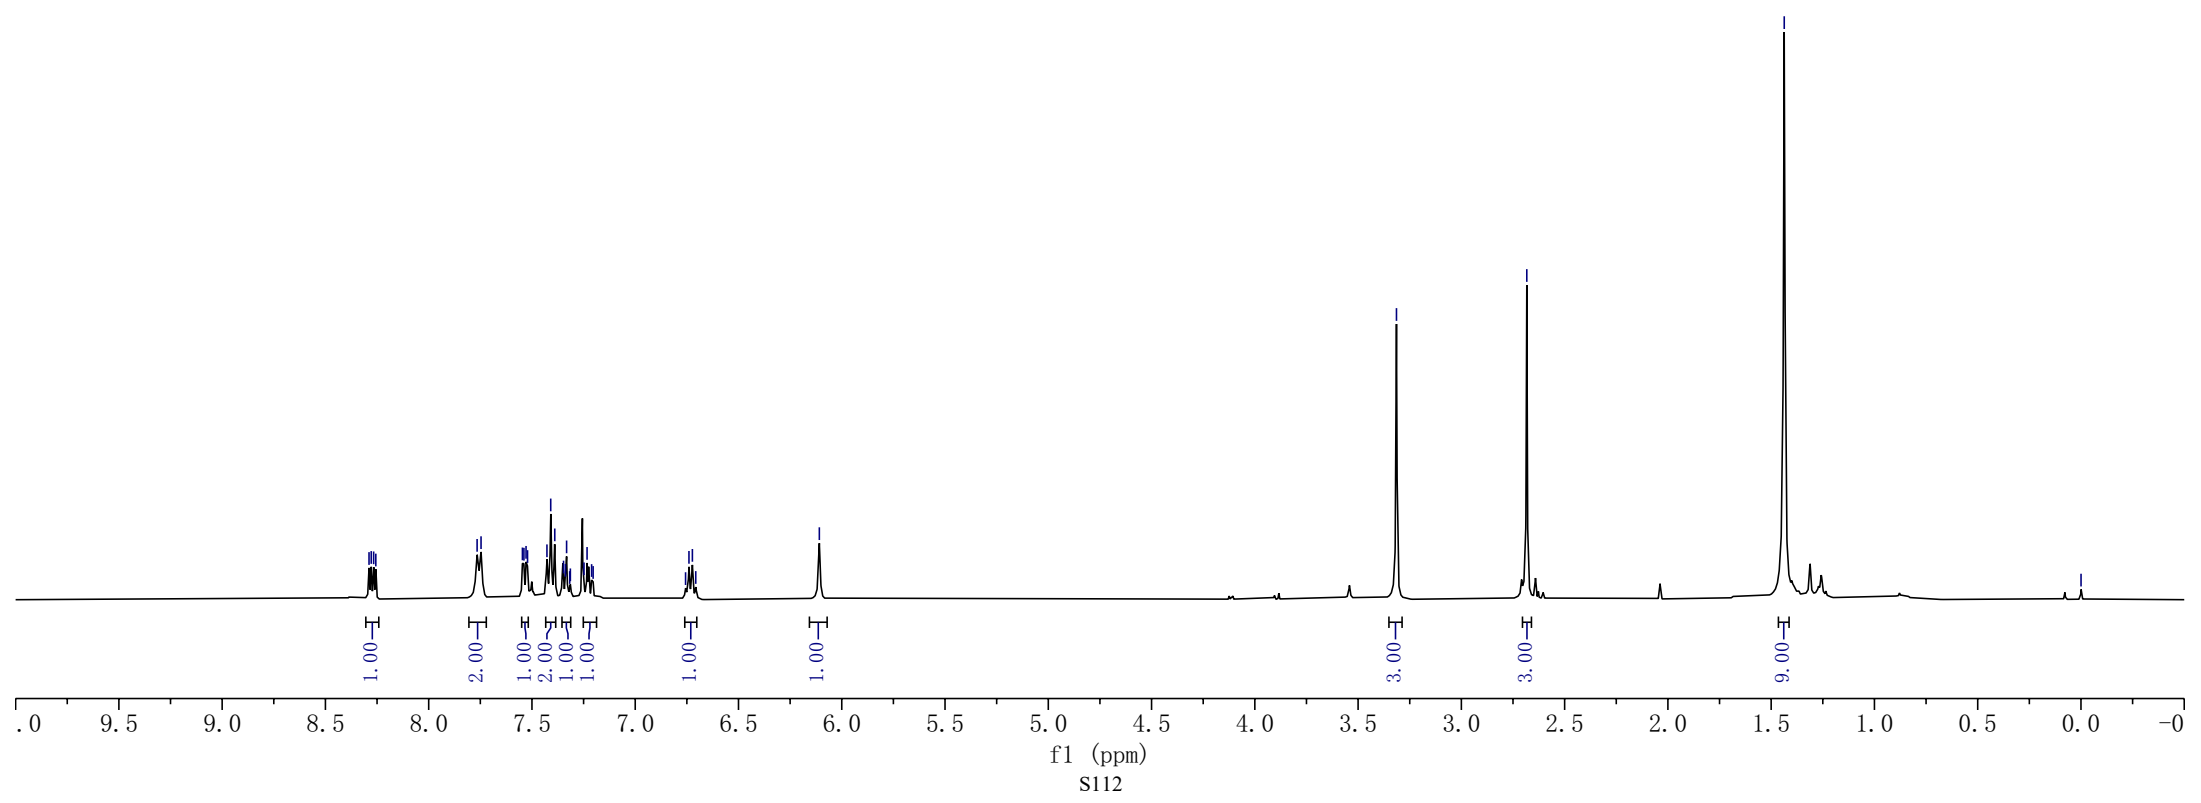



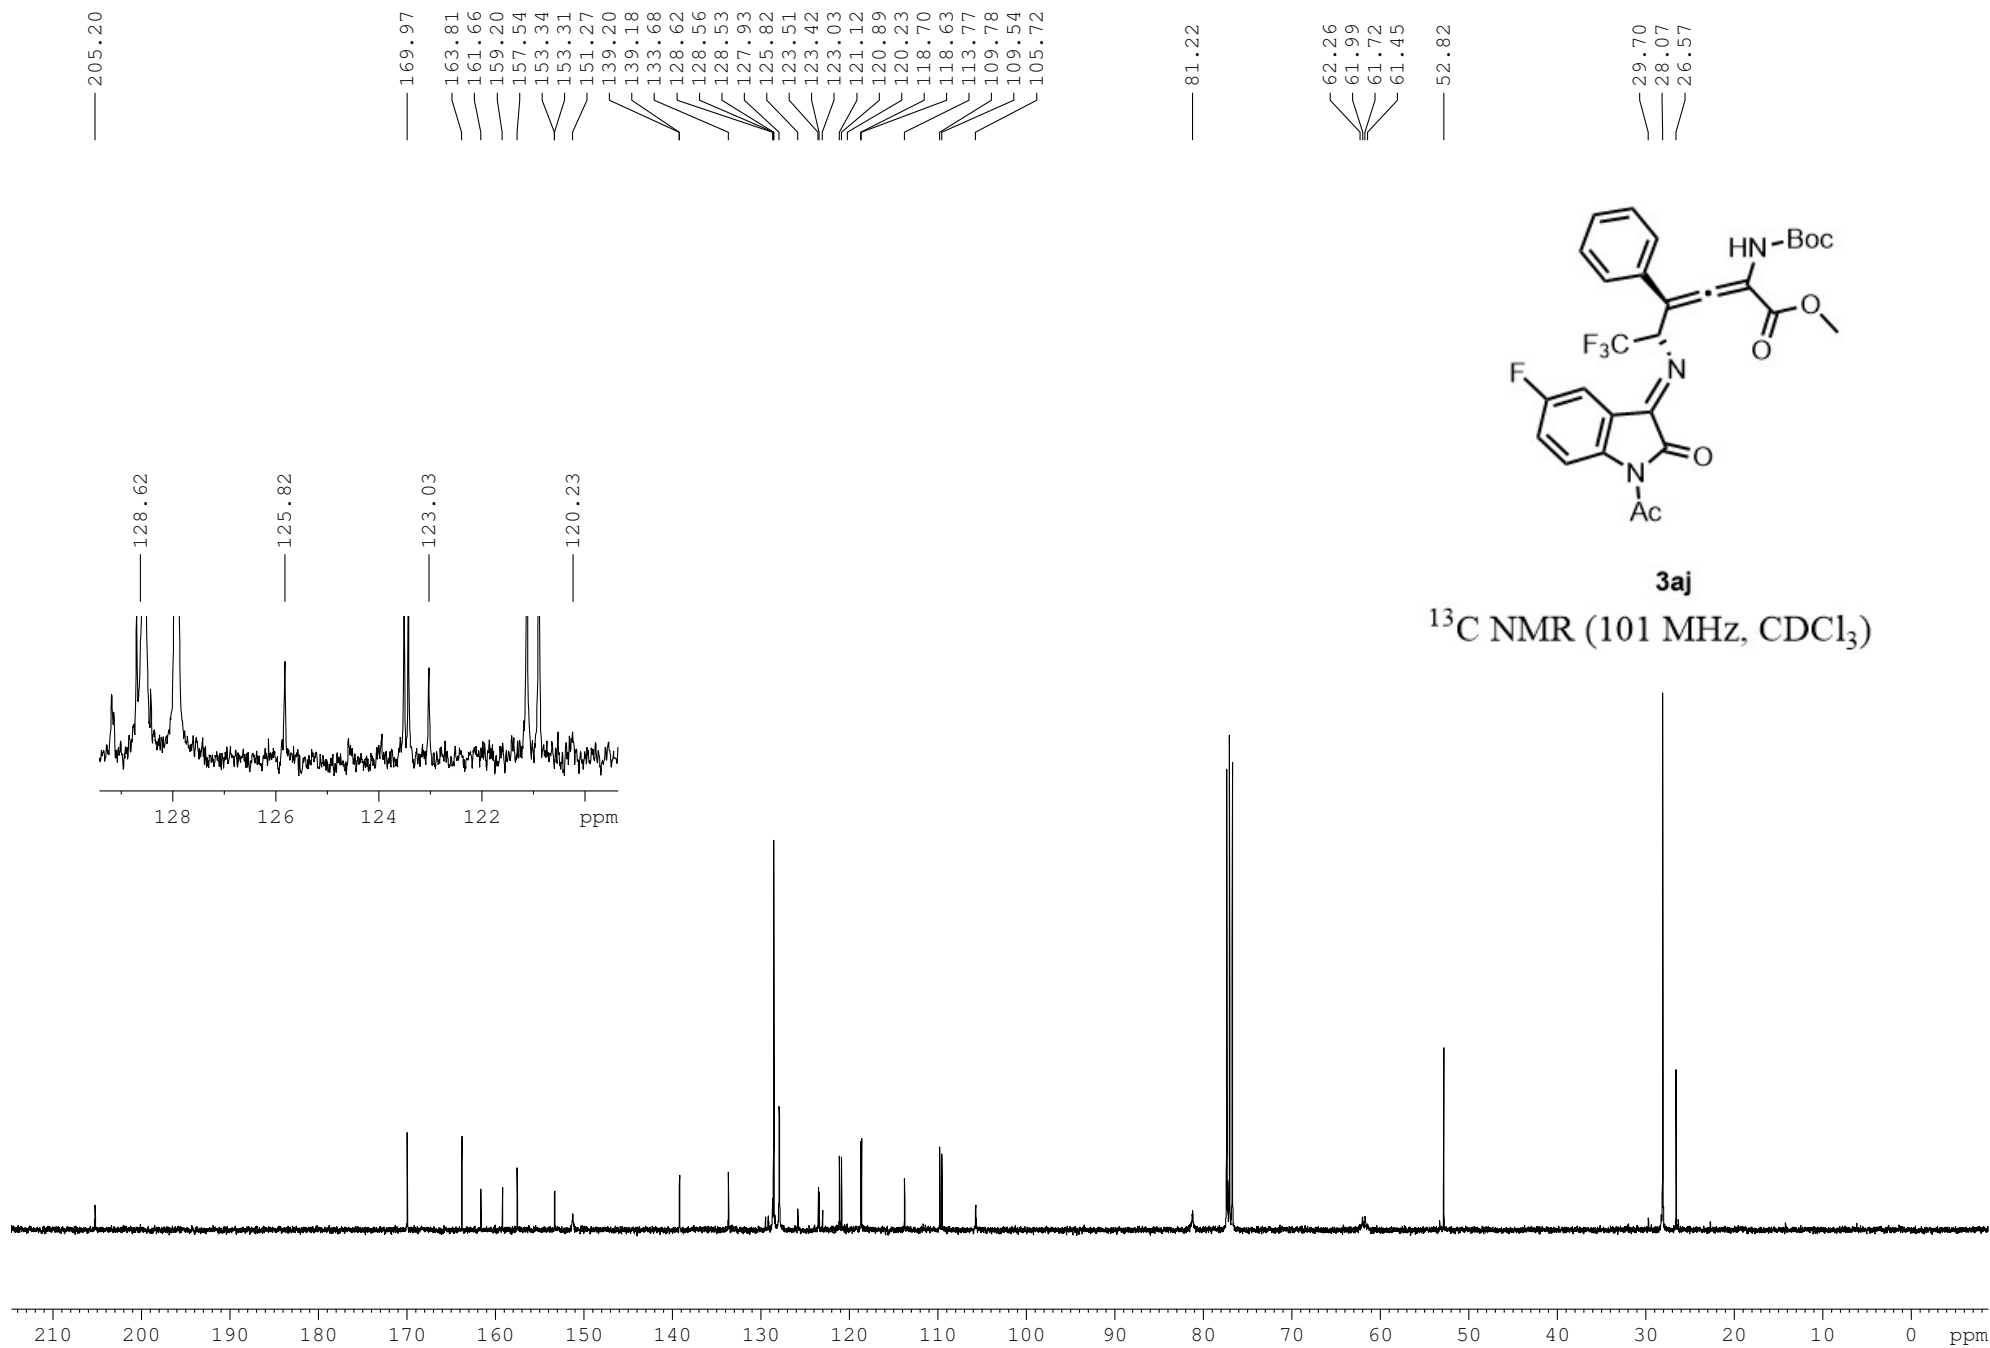

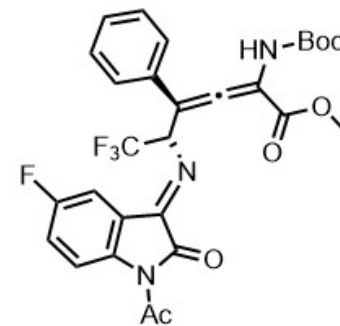

**3aj**

<sup>19</sup>F NMR (376 MHz, CDCl<sub>3</sub>)

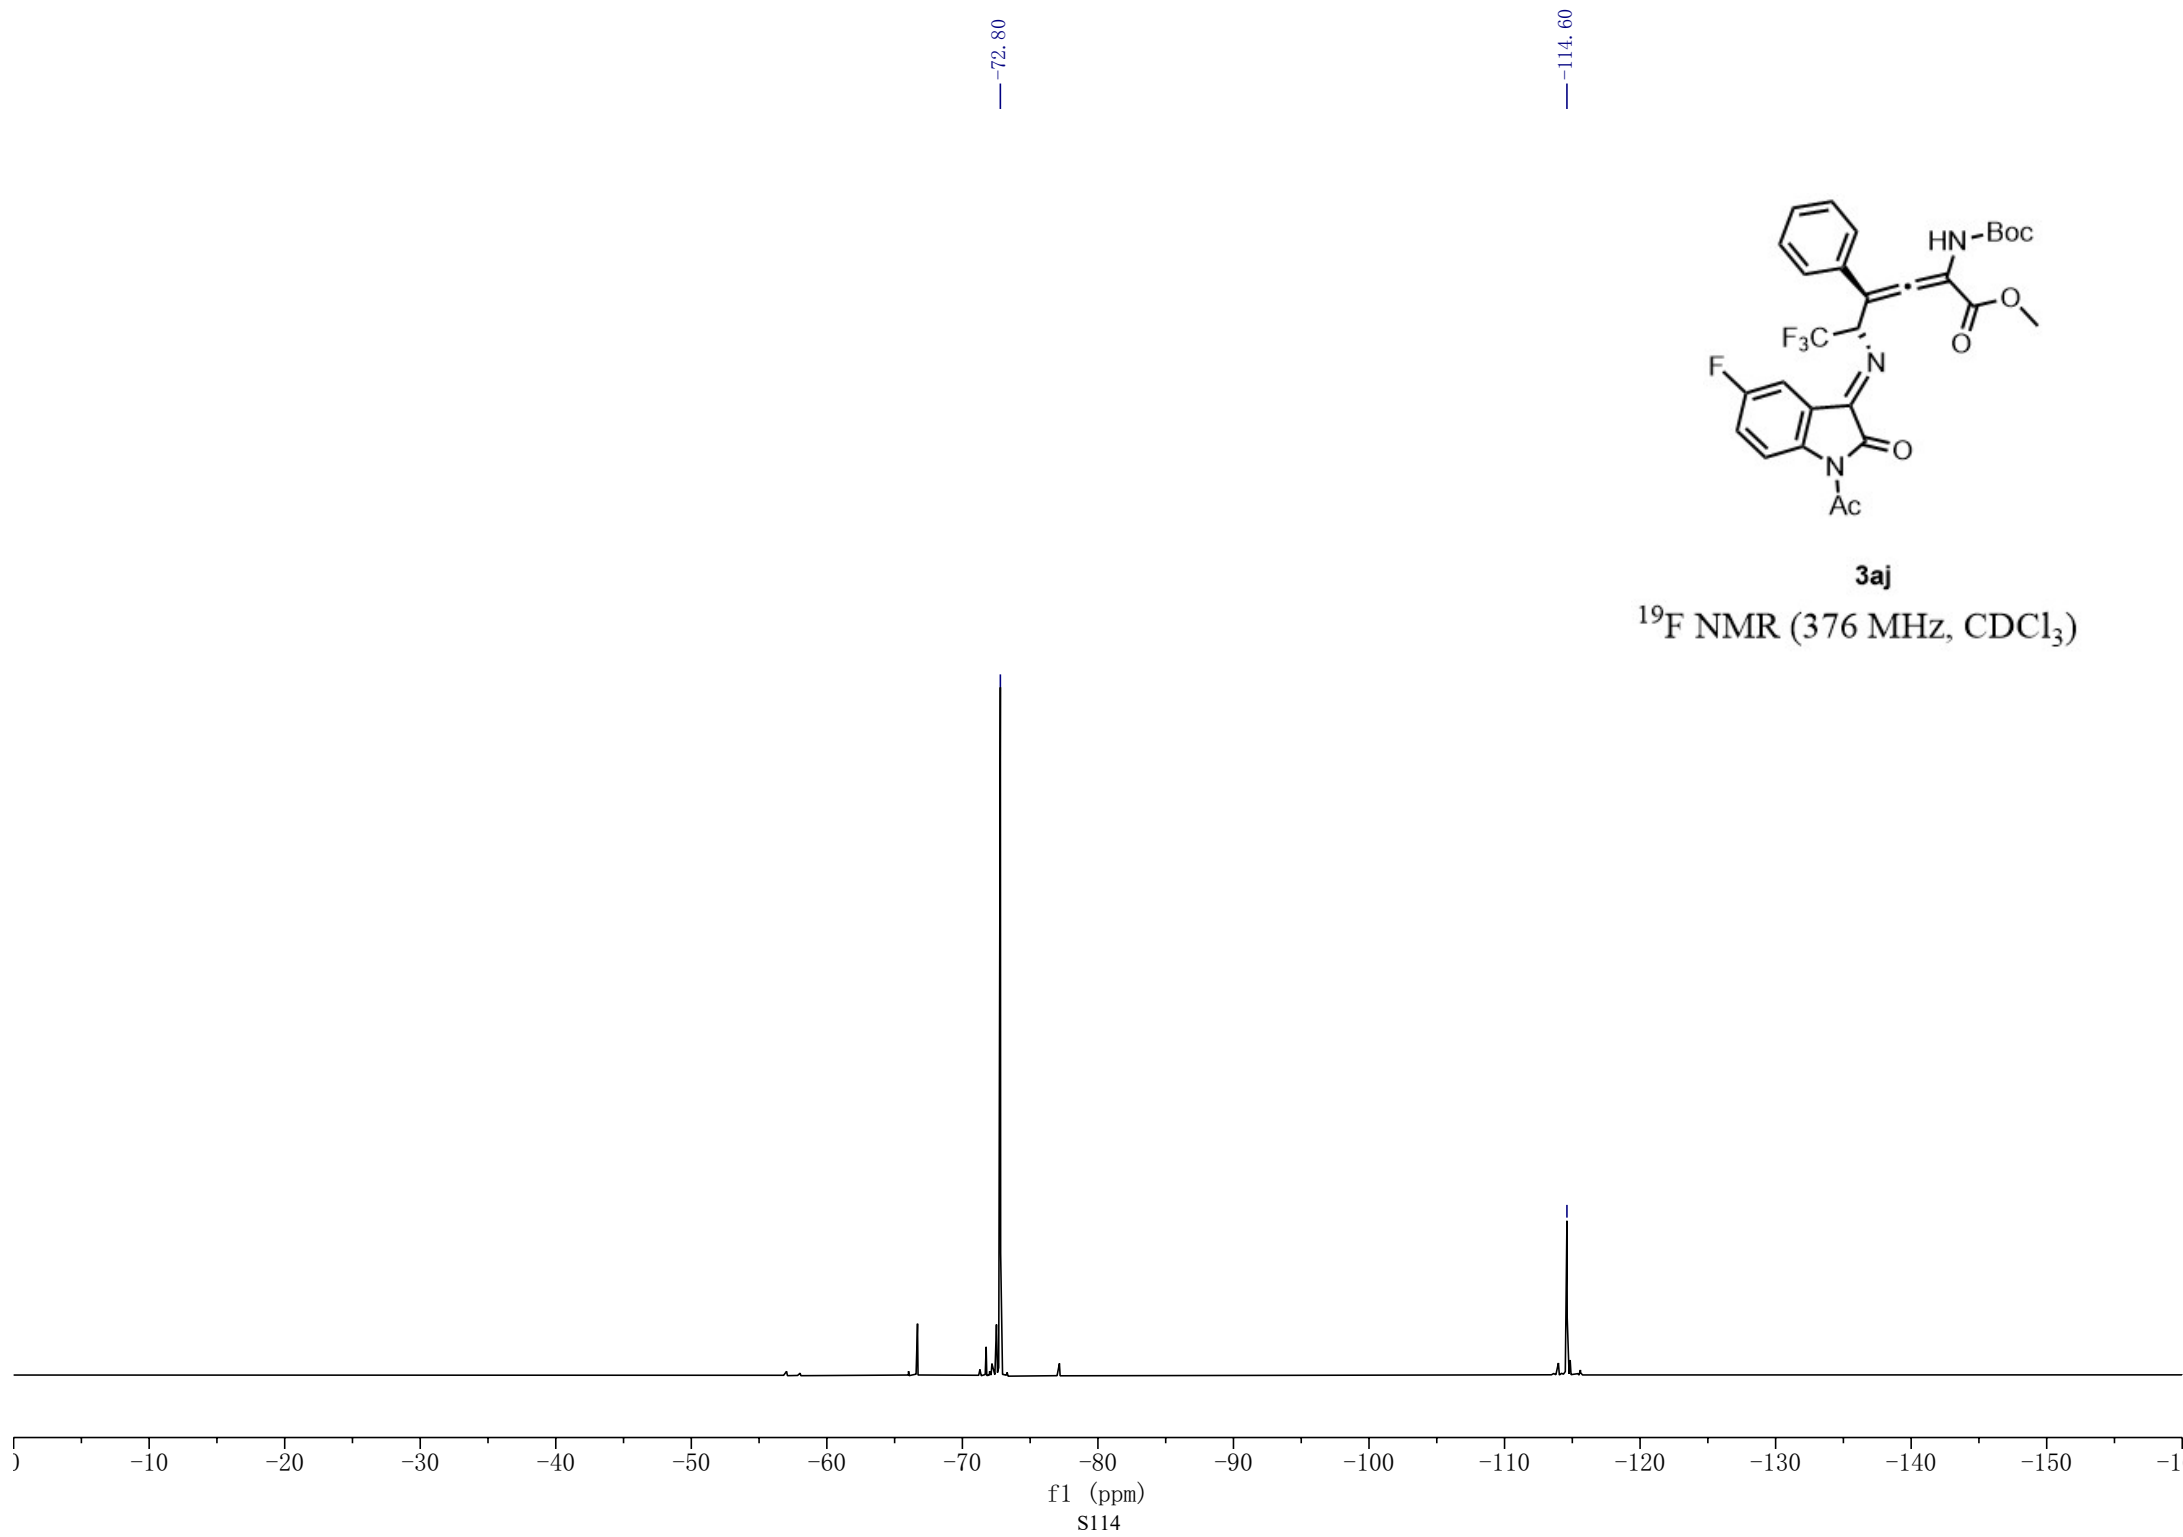

8.24  
8.22  
7.82  
7.81  
7.76  
7.74  
7.50  
7.48  
7.43  
7.41  
7.39  
7.36  
7.35  
7.34  
7.33  
7.32  
6.74  
6.72  
6.70  
6.69  
6.11

3.33

2.68

1.44

-0.00

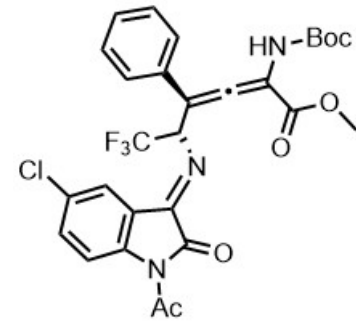

**3ak**

<sup>1</sup>H NMR (400 MHz, CDCl<sub>3</sub>)

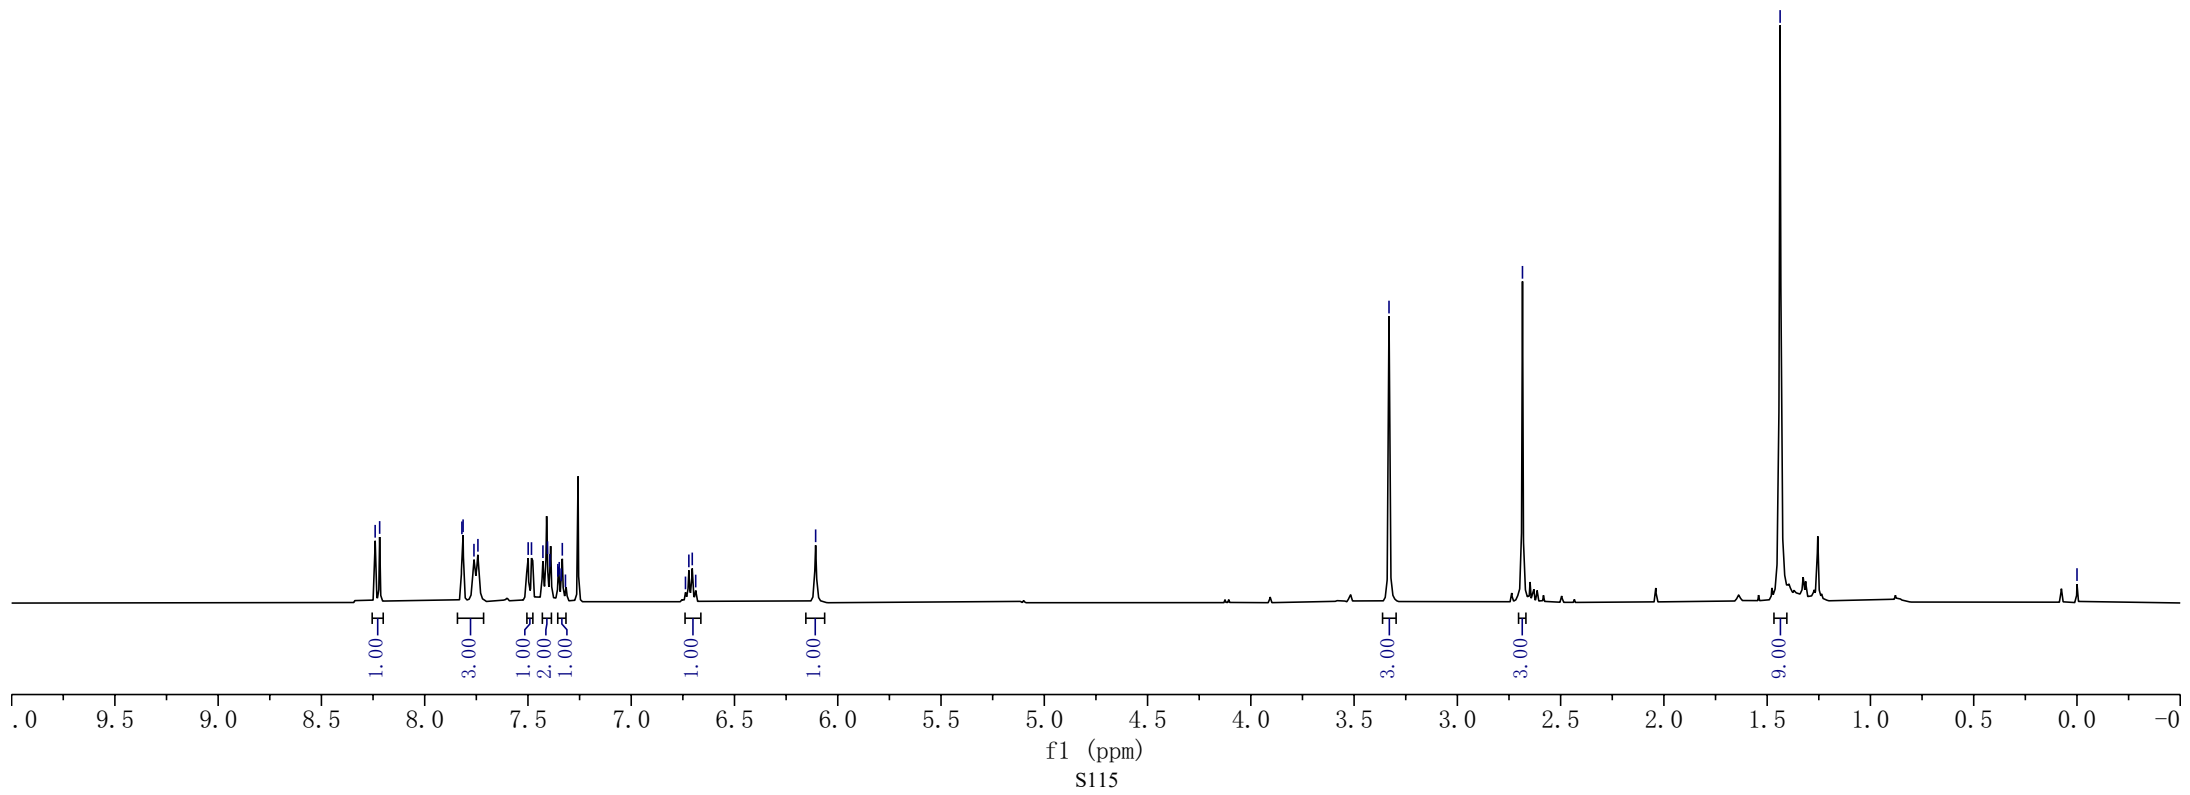

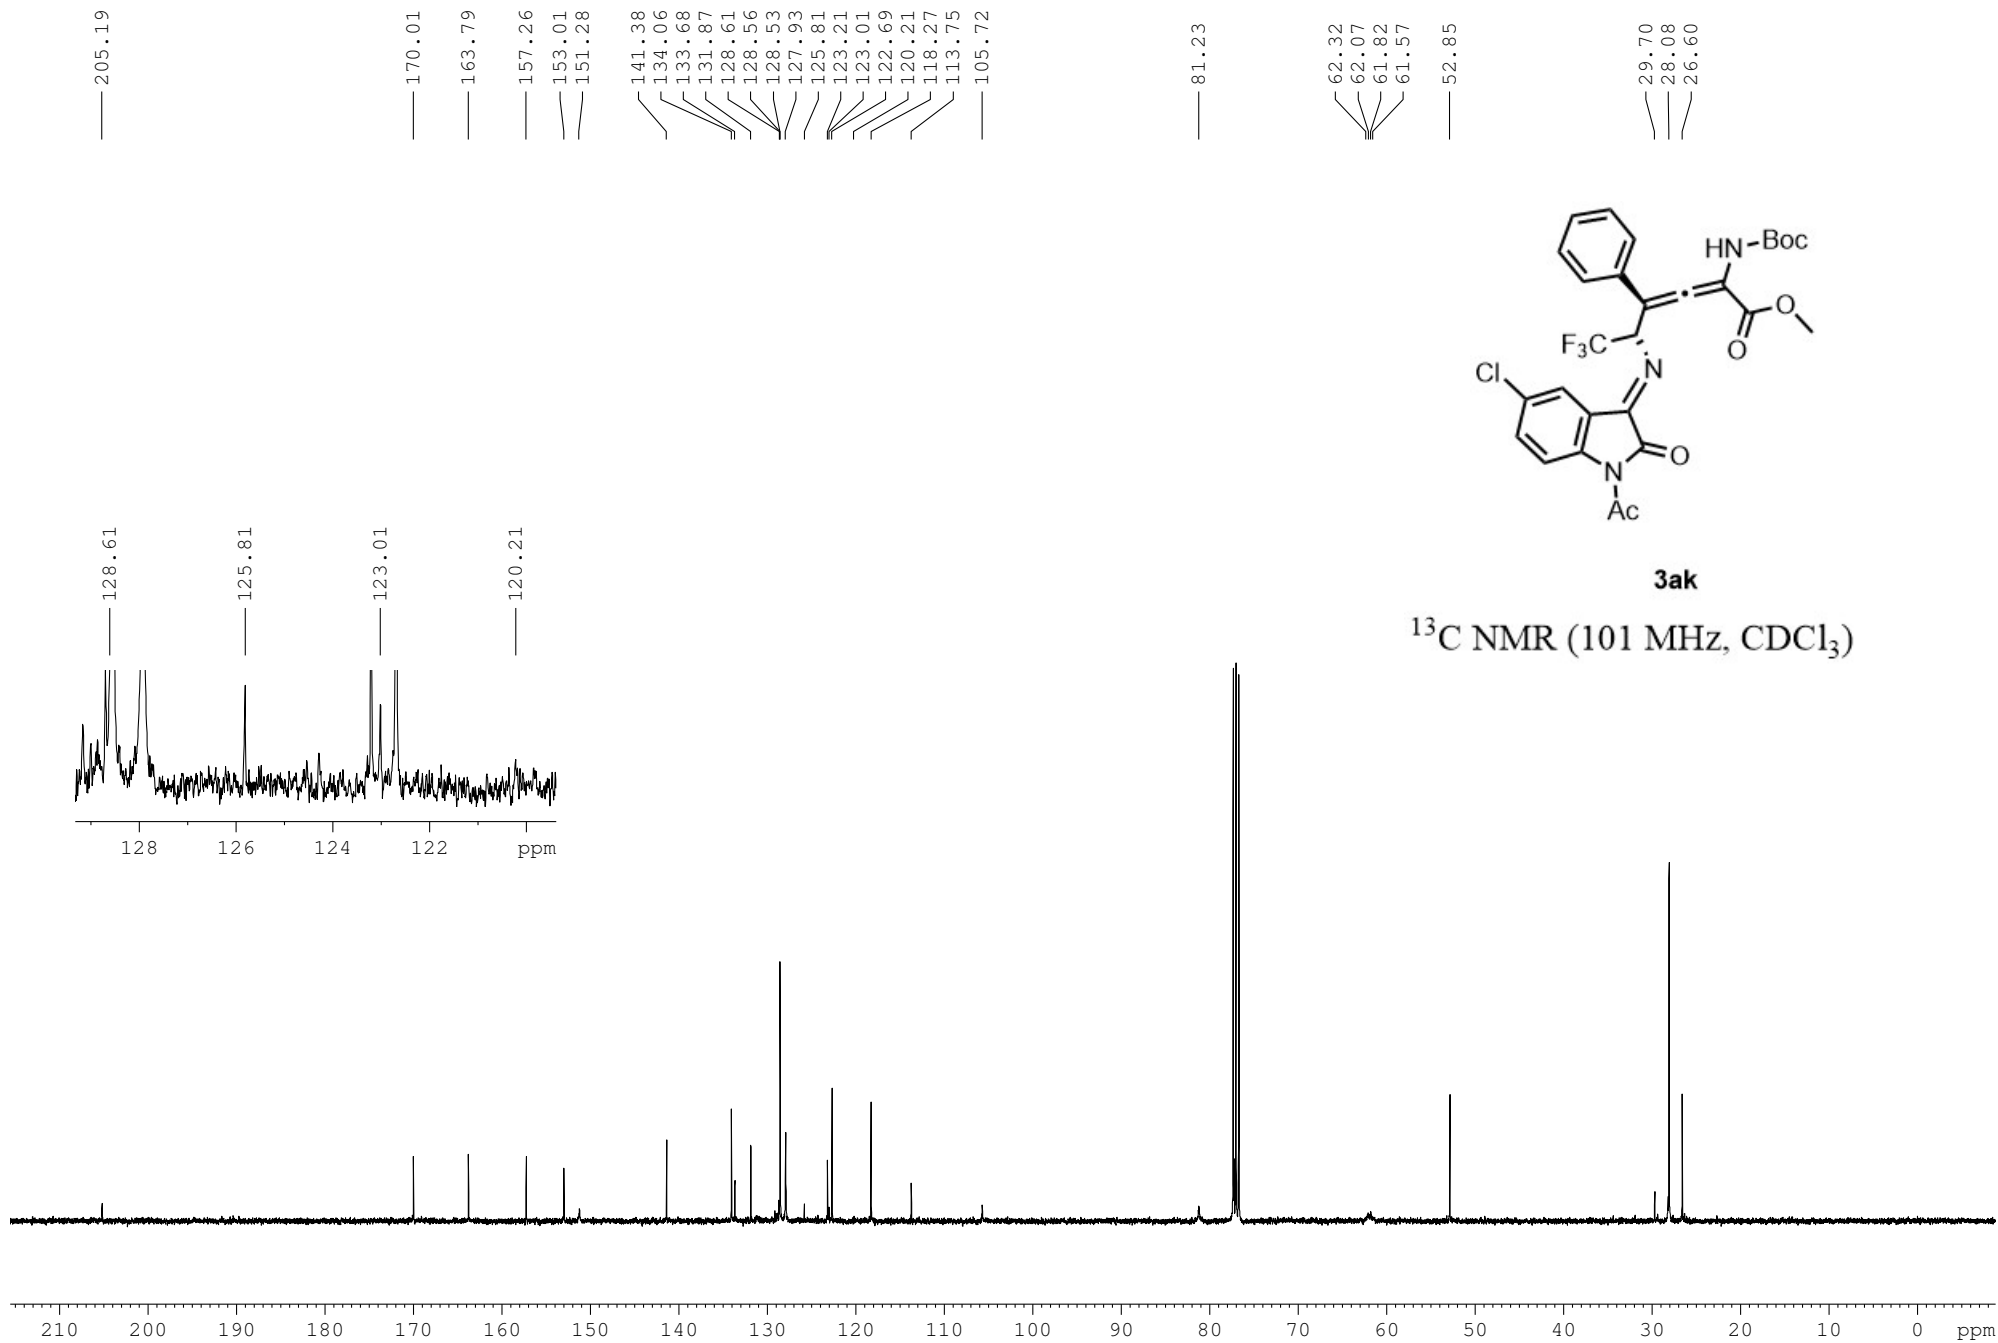

-72.75

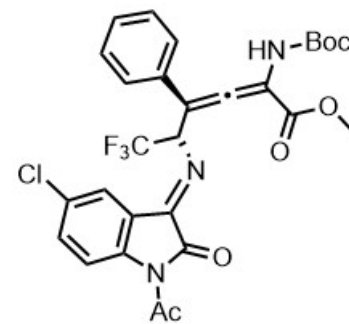

**3ak**

<sup>19</sup>F NMR (376 MHz, CDCl<sub>3</sub>)

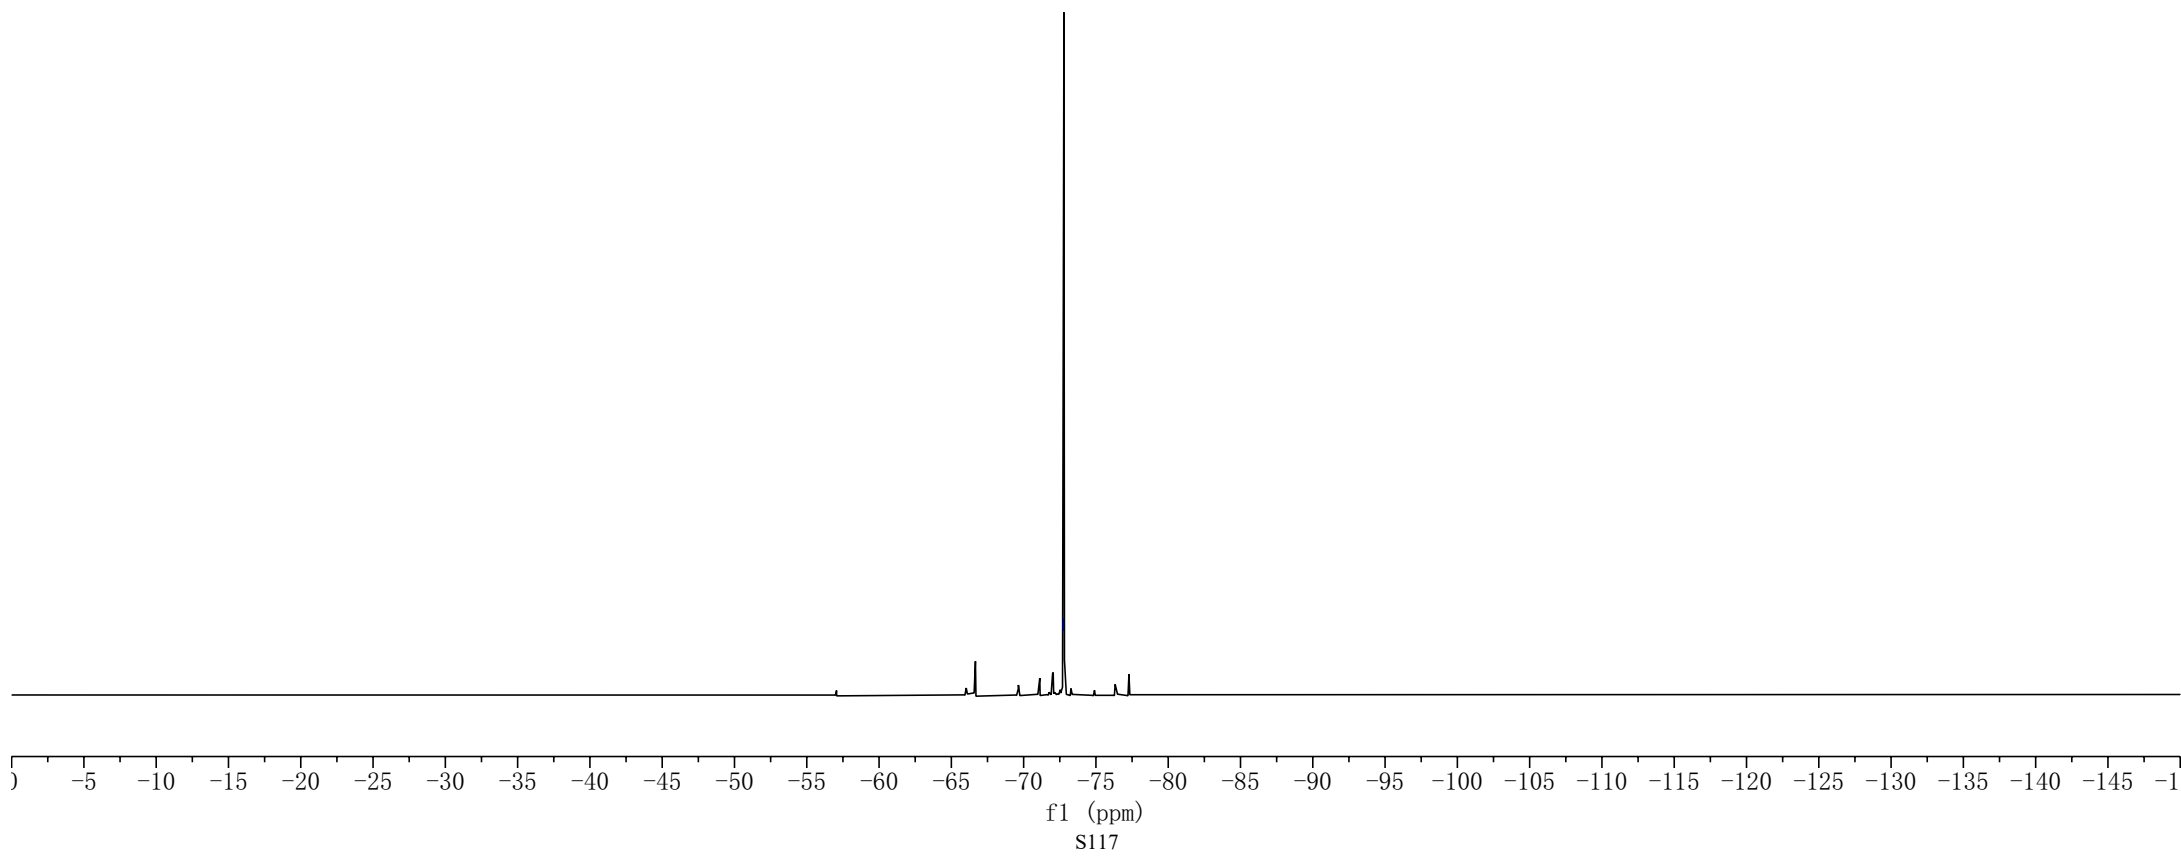

8.09  
8.07  
7.88  
7.87  
7.68  
7.66  
7.57  
7.56  
7.54  
7.34  
7.32  
7.30  
7.26  
7.24  
7.23  
6.65  
6.63  
6.62  
6.60

— 6.04

— 3.25

— 2.59

— 1.35

— -0.00

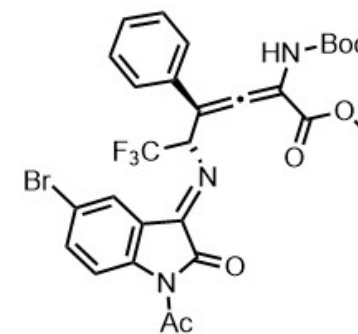

**3aI**

<sup>1</sup>H NMR (400 MHz, CDCl<sub>3</sub>)

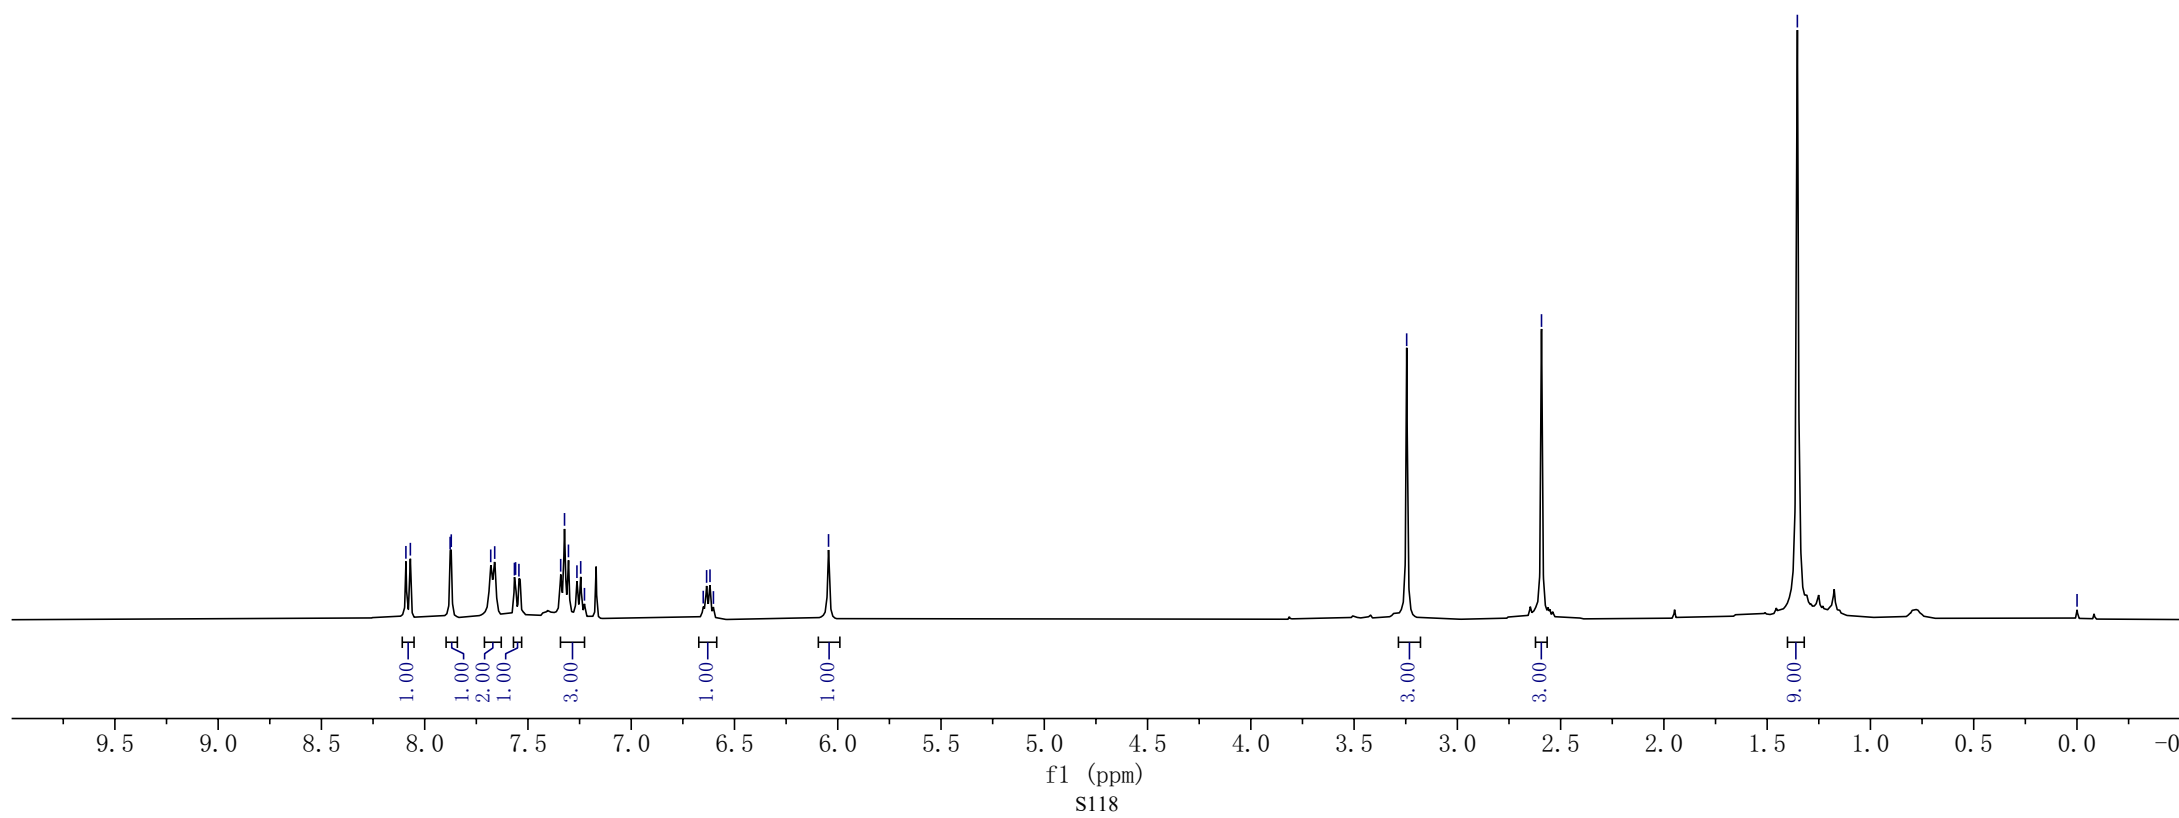

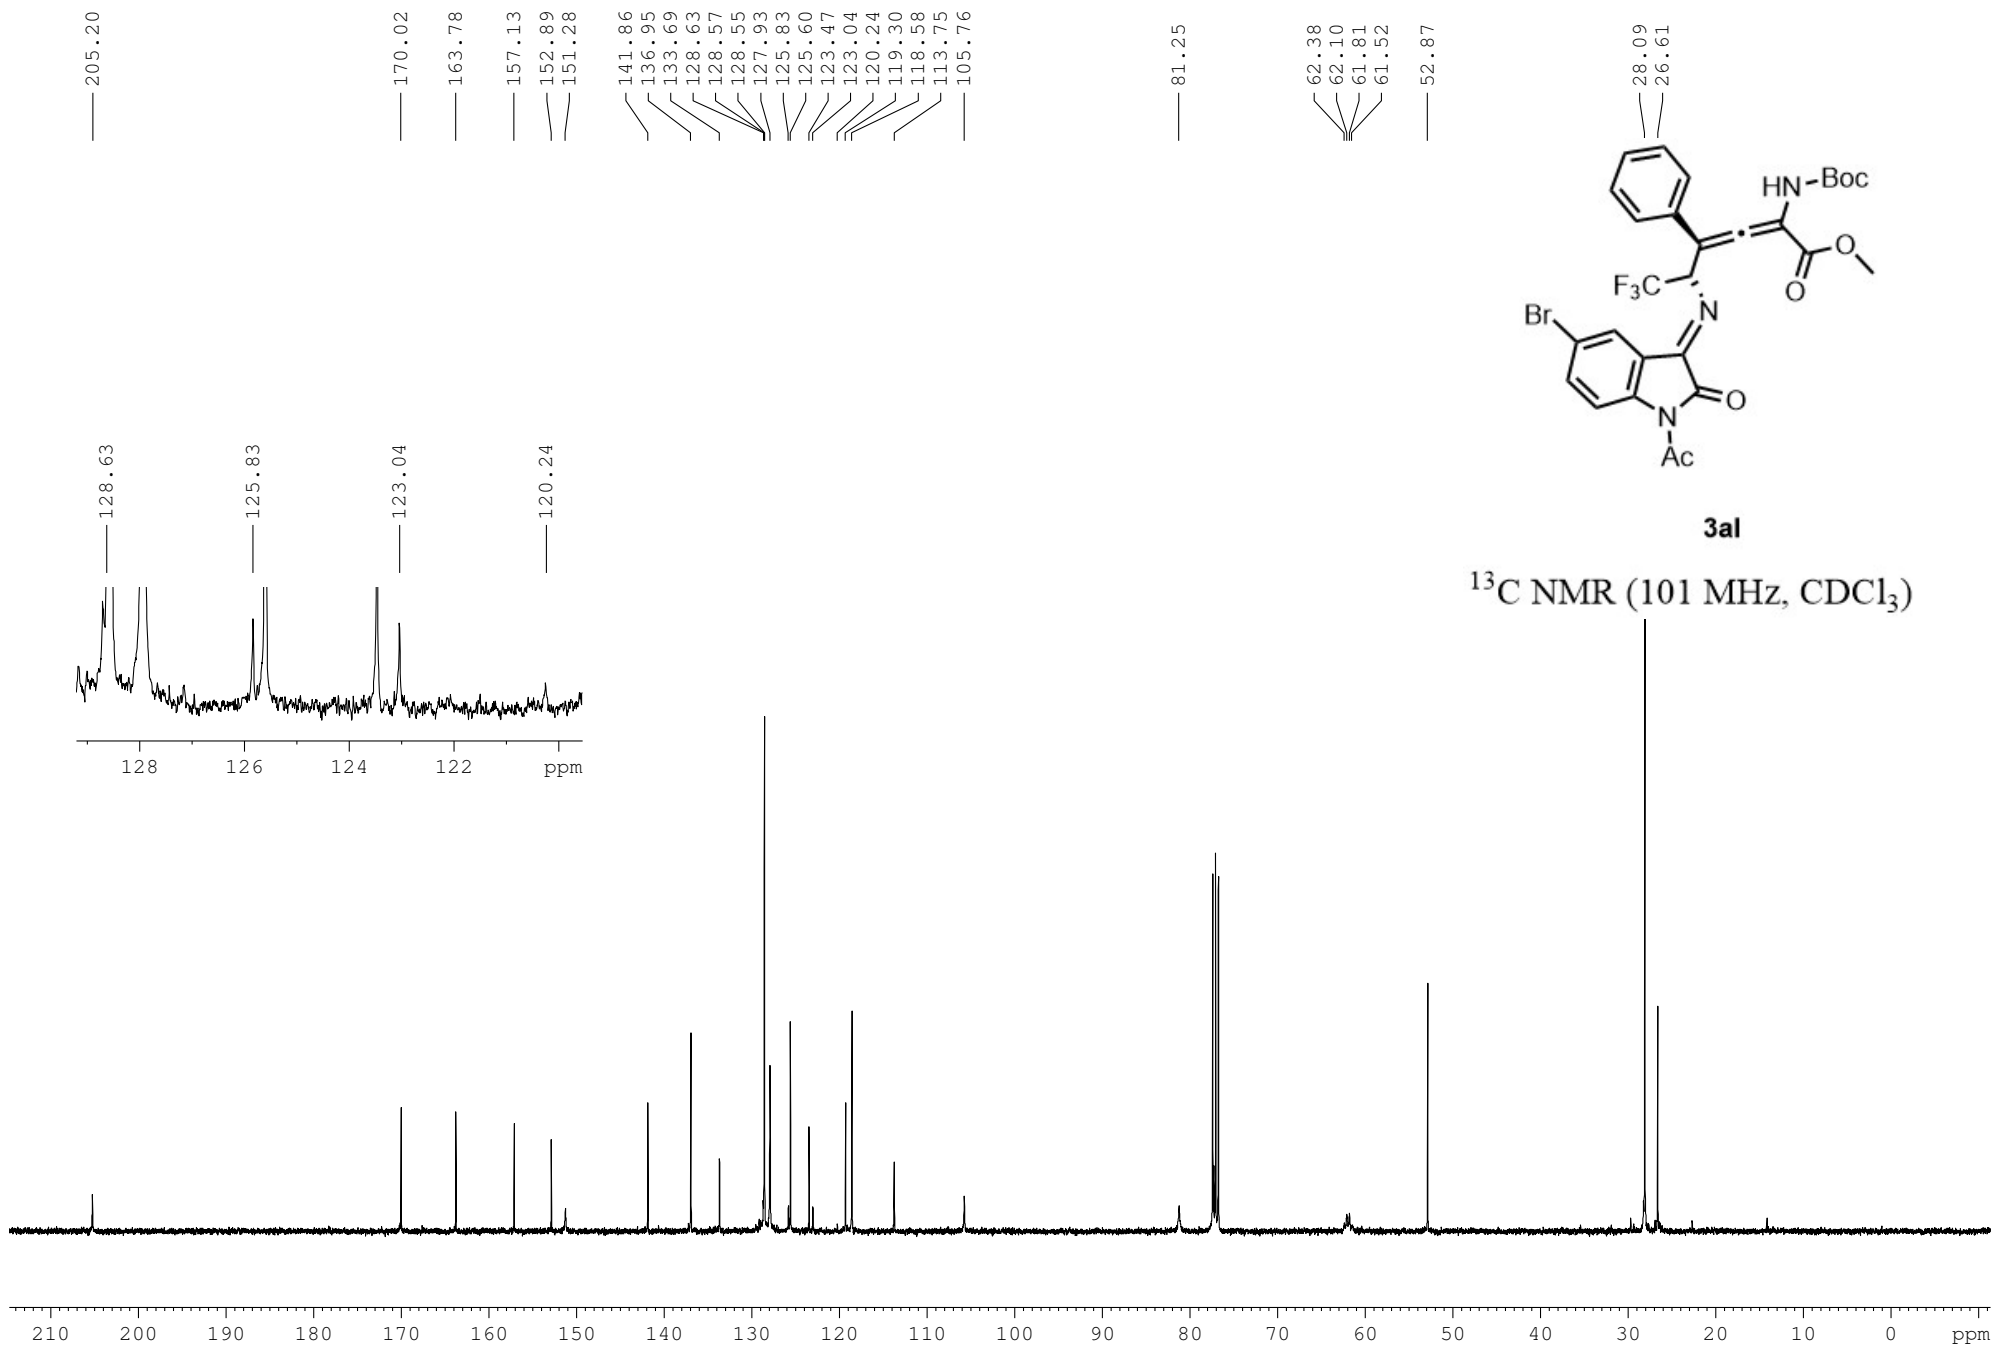

-72.75

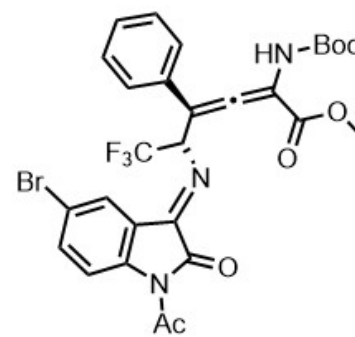

**3aI**

<sup>19</sup>F NMR (376 MHz, CDCl<sub>3</sub>)

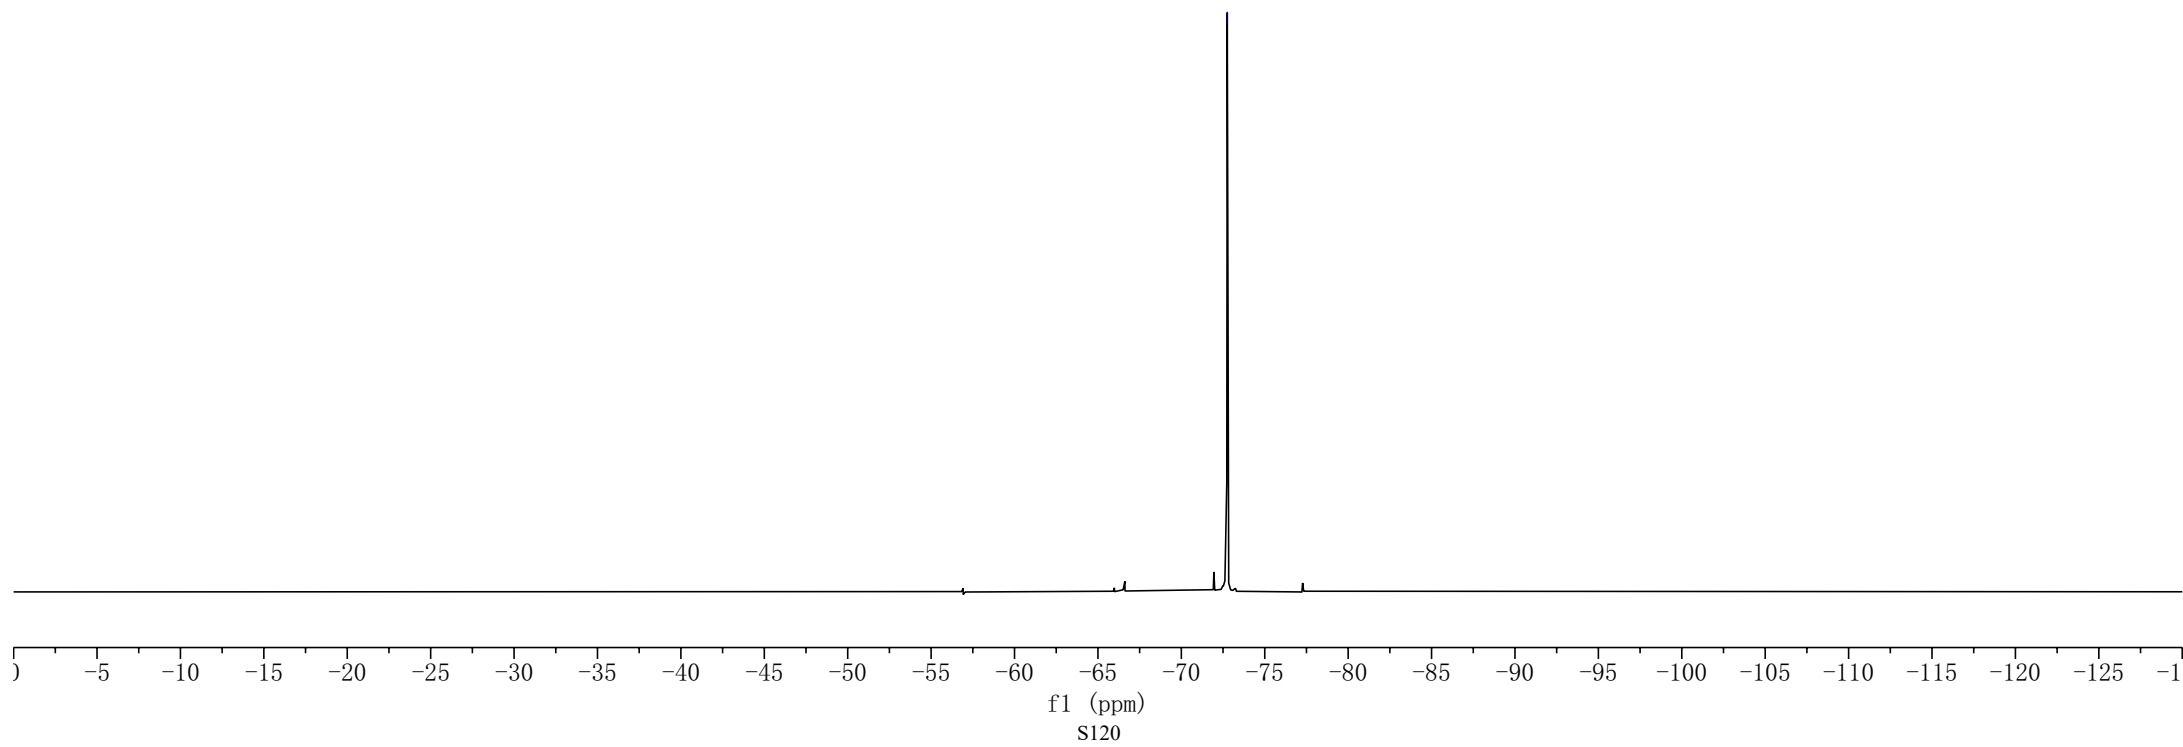



8.06  
8.04  
7.71  
7.69  
7.58  
7.36  
7.34  
7.32  
7.28  
7.26  
7.24  
6.67  
6.66  
6.64  
6.63  
6.03

3.18

2.60

2.31

1.37

-0.00

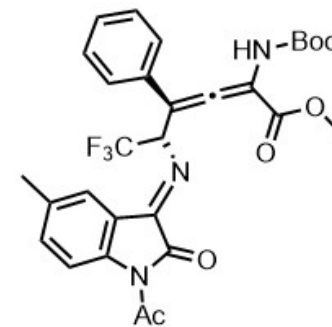

**3am**

<sup>1</sup>H NMR (400 MHz, CDCl<sub>3</sub>)

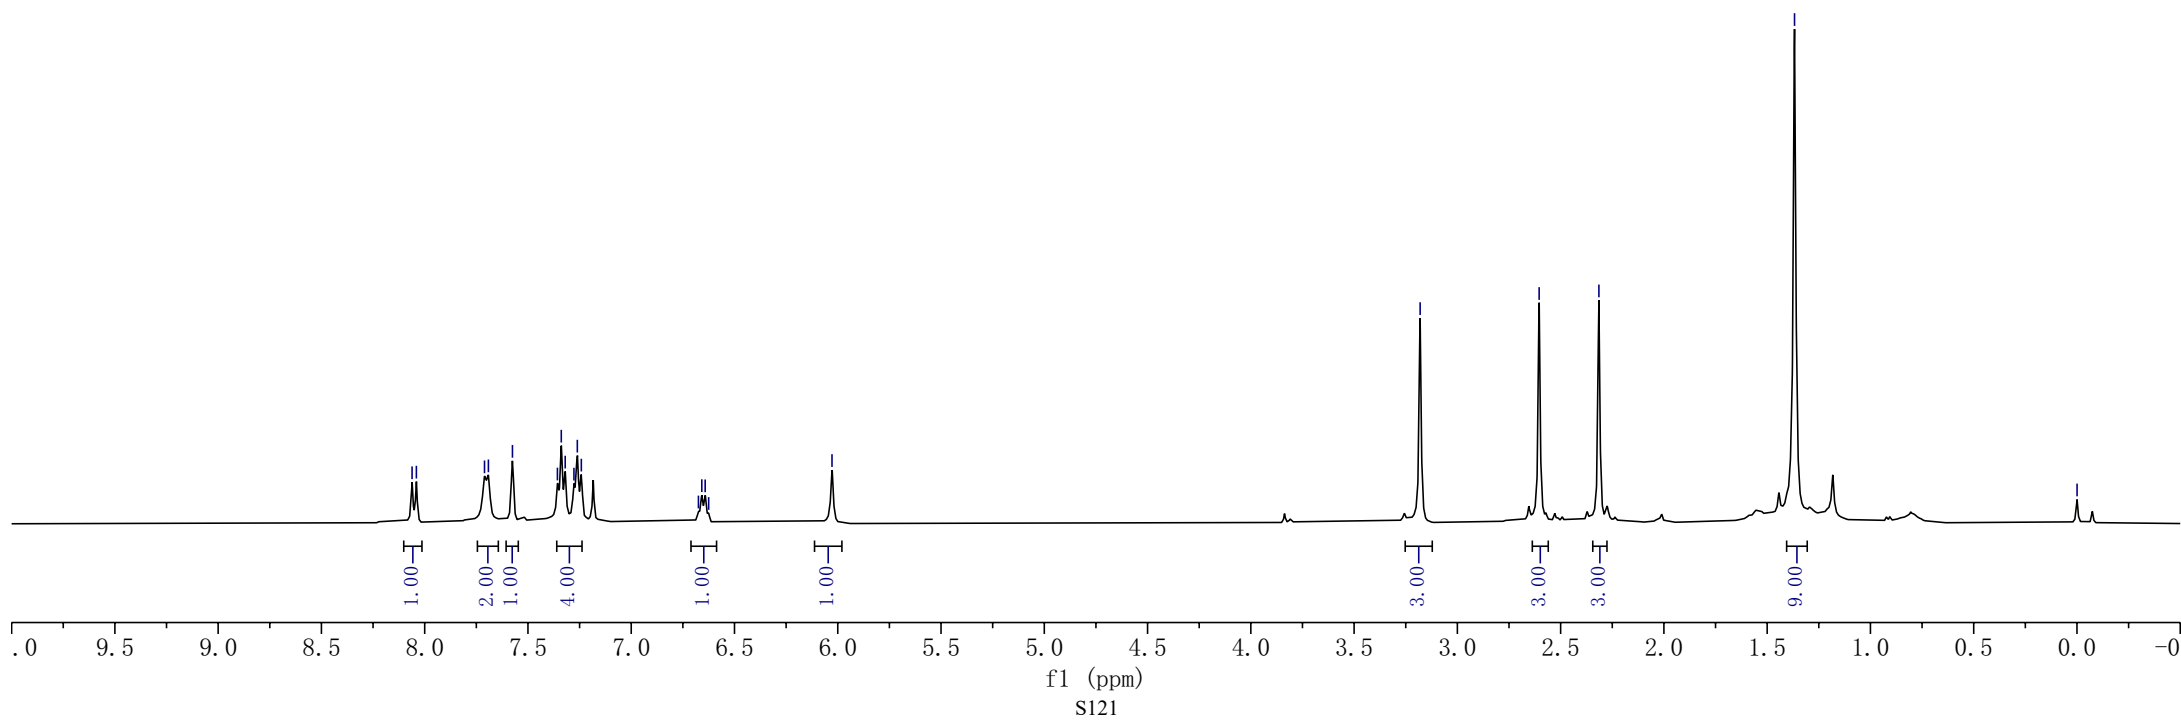

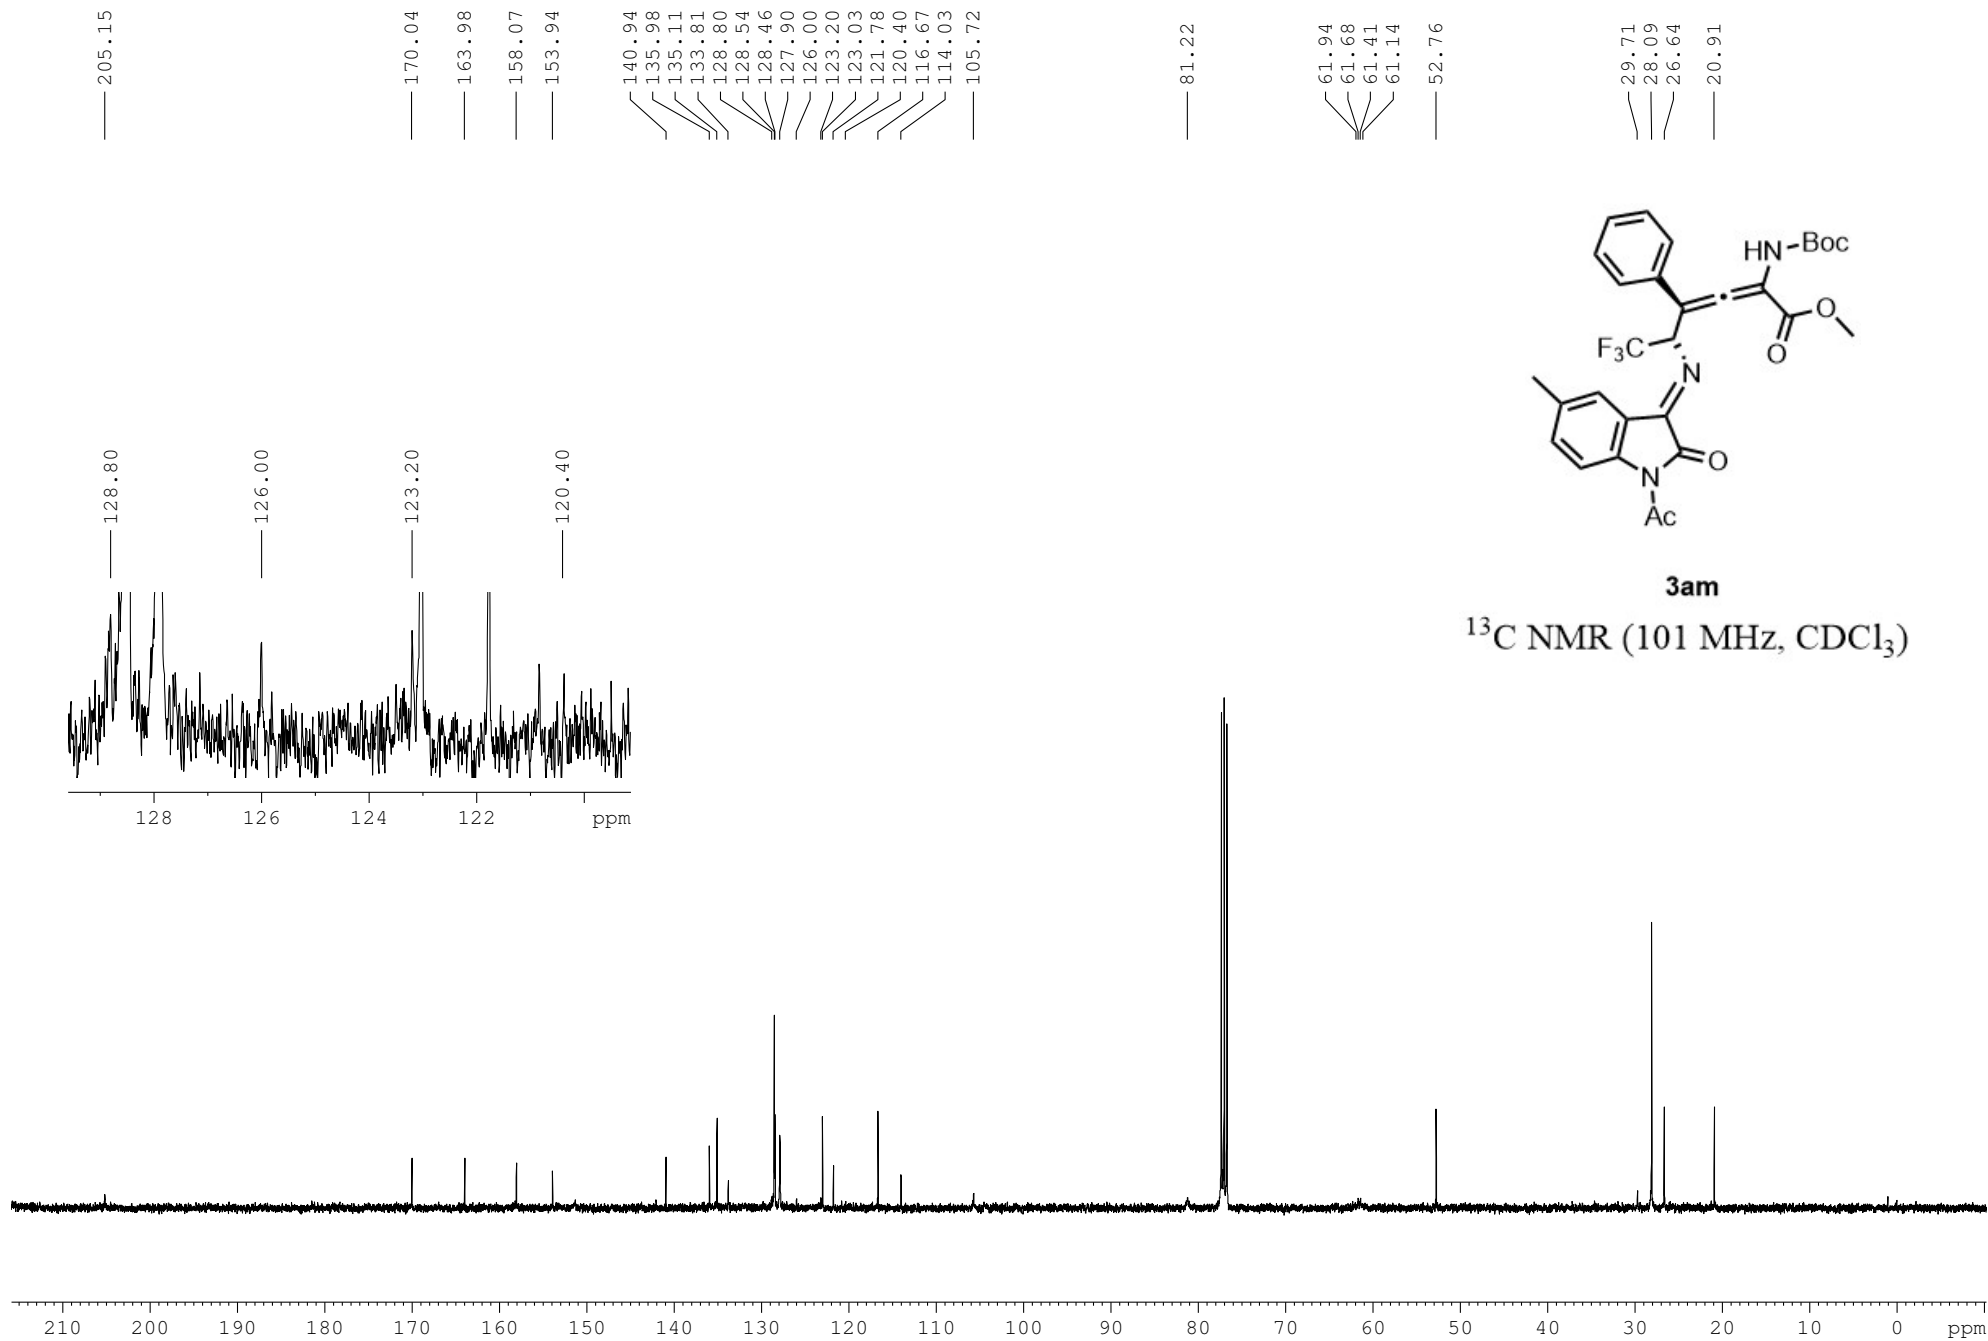

-72.96

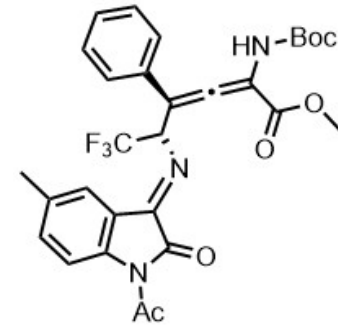

**3am**

<sup>19</sup>F NMR (376 MHz, CDCl<sub>3</sub>)

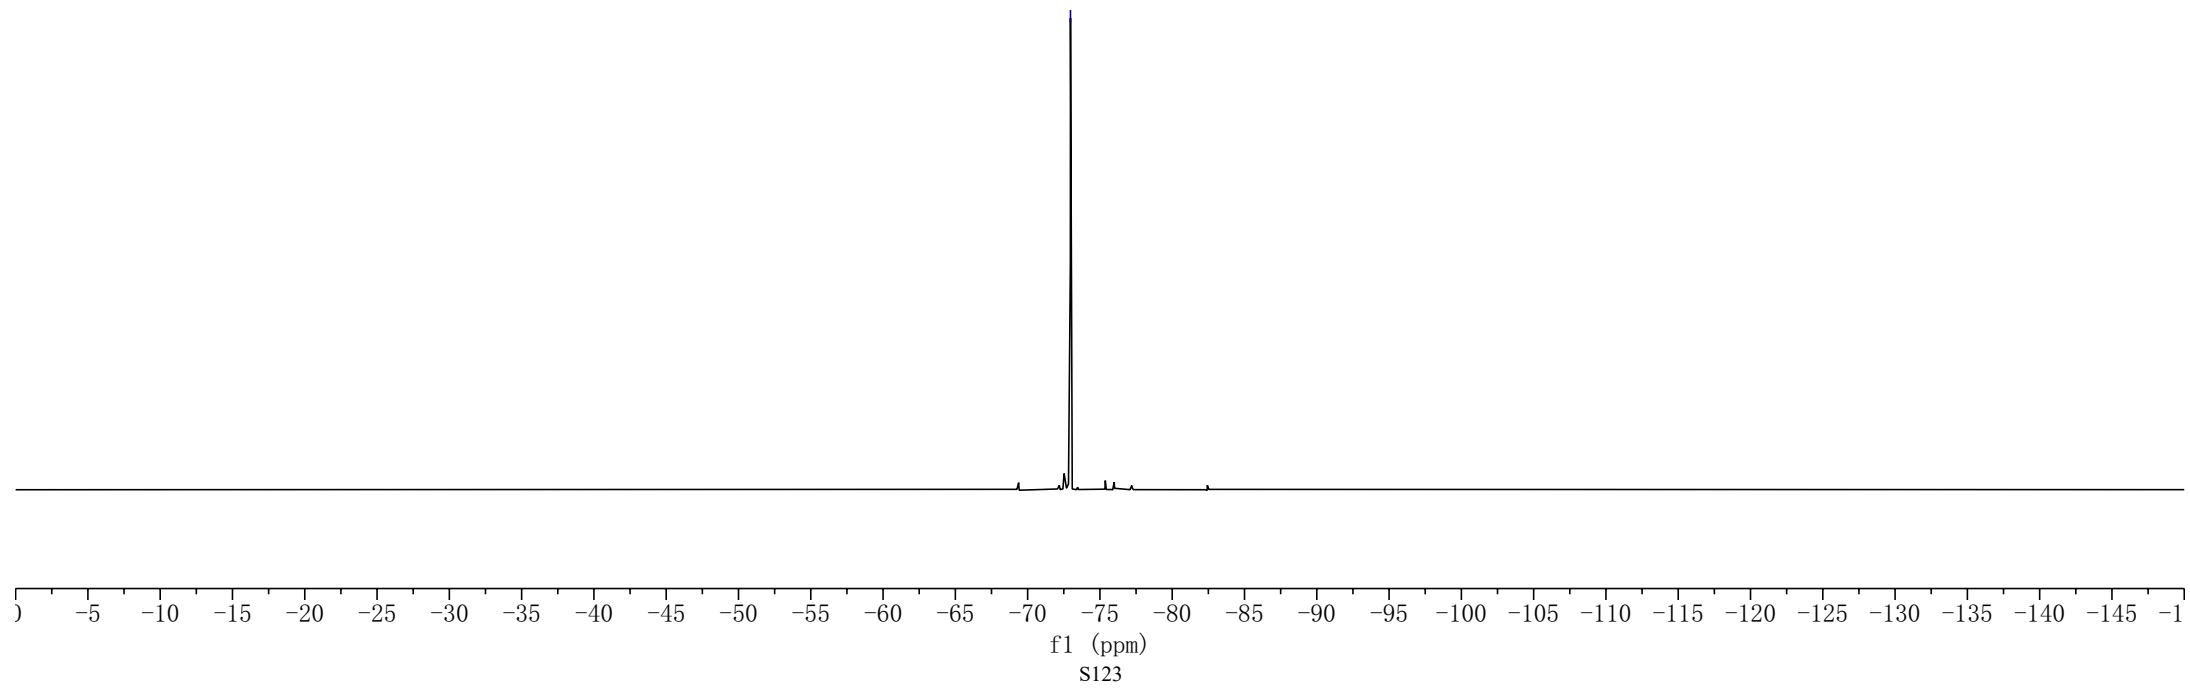

8.33  
8.33  
7.79  
7.77  
7.76  
7.74  
7.43  
7.42  
7.40  
7.39  
7.35  
7.34  
7.33  
7.32  
7.31  
7.29  
7.28  
7.27  
7.26  
6.74  
6.72  
6.71  
6.69  
6.33  
6.10

— 3.31

— 2.69

— 1.43

— 0.00

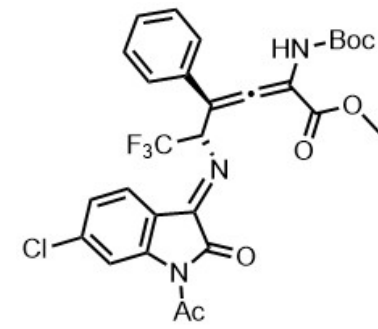

**3an**

<sup>1</sup>H NMR (400 MHz, CDCl<sub>3</sub>)

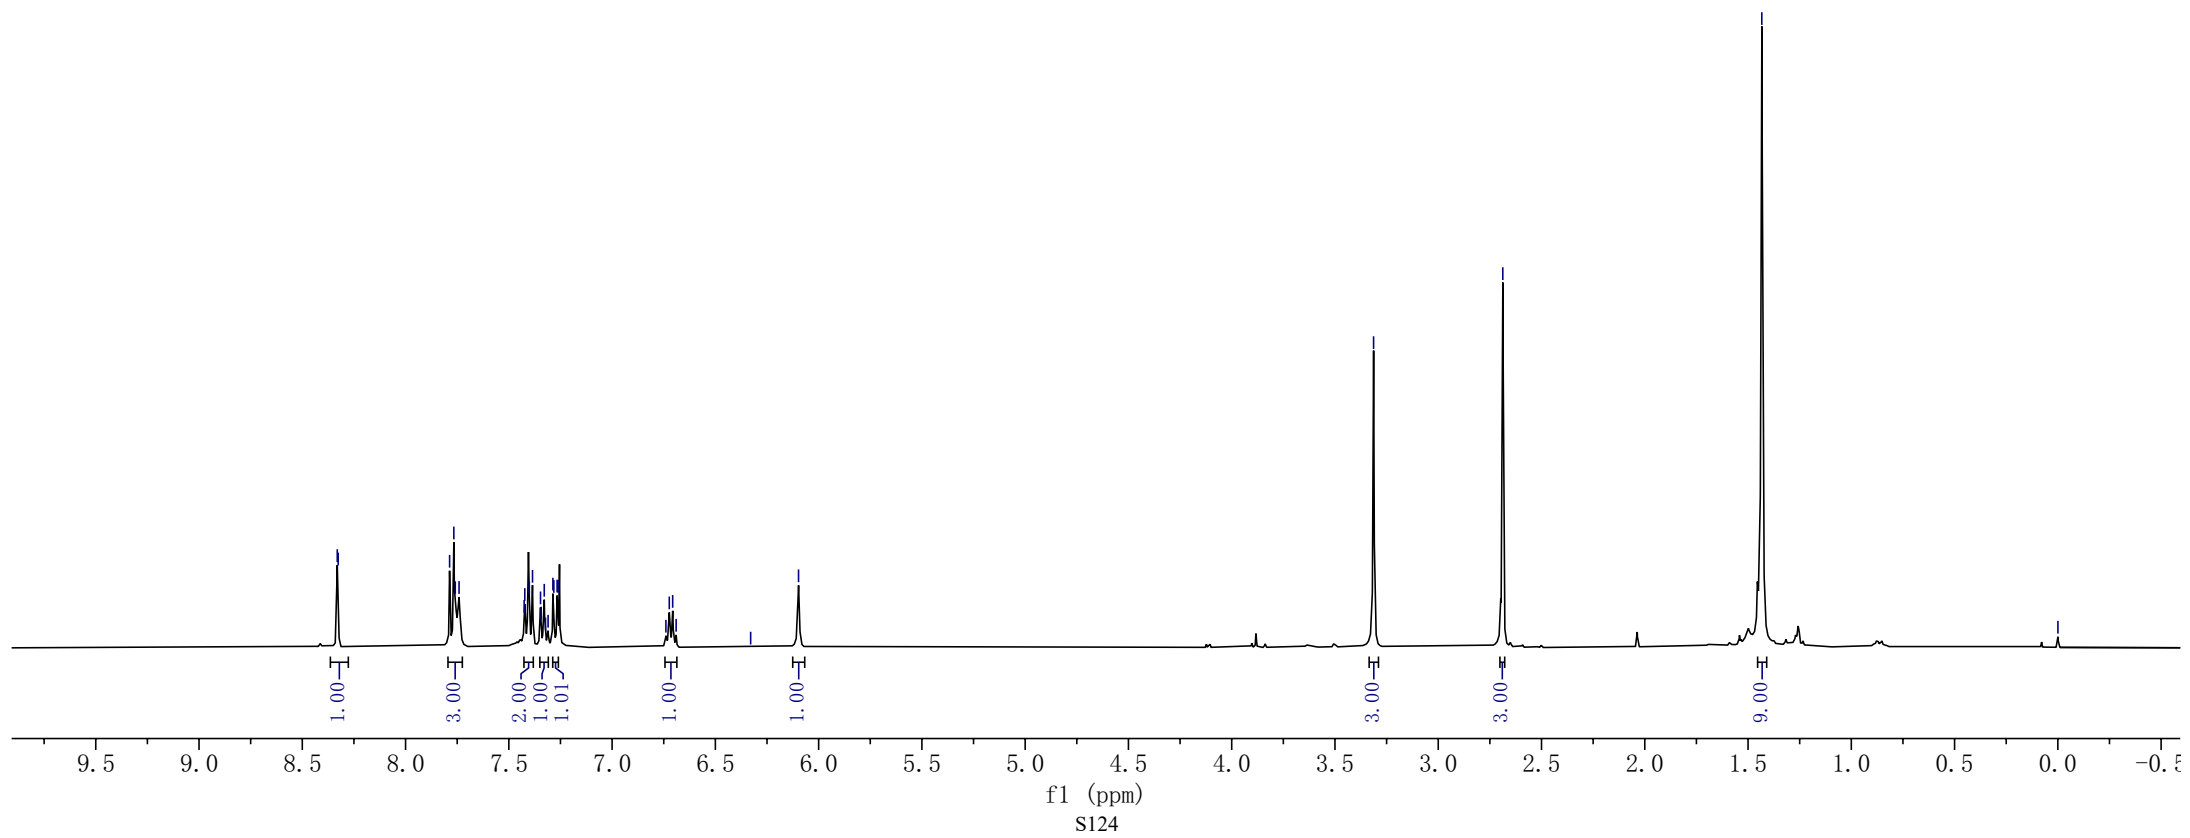

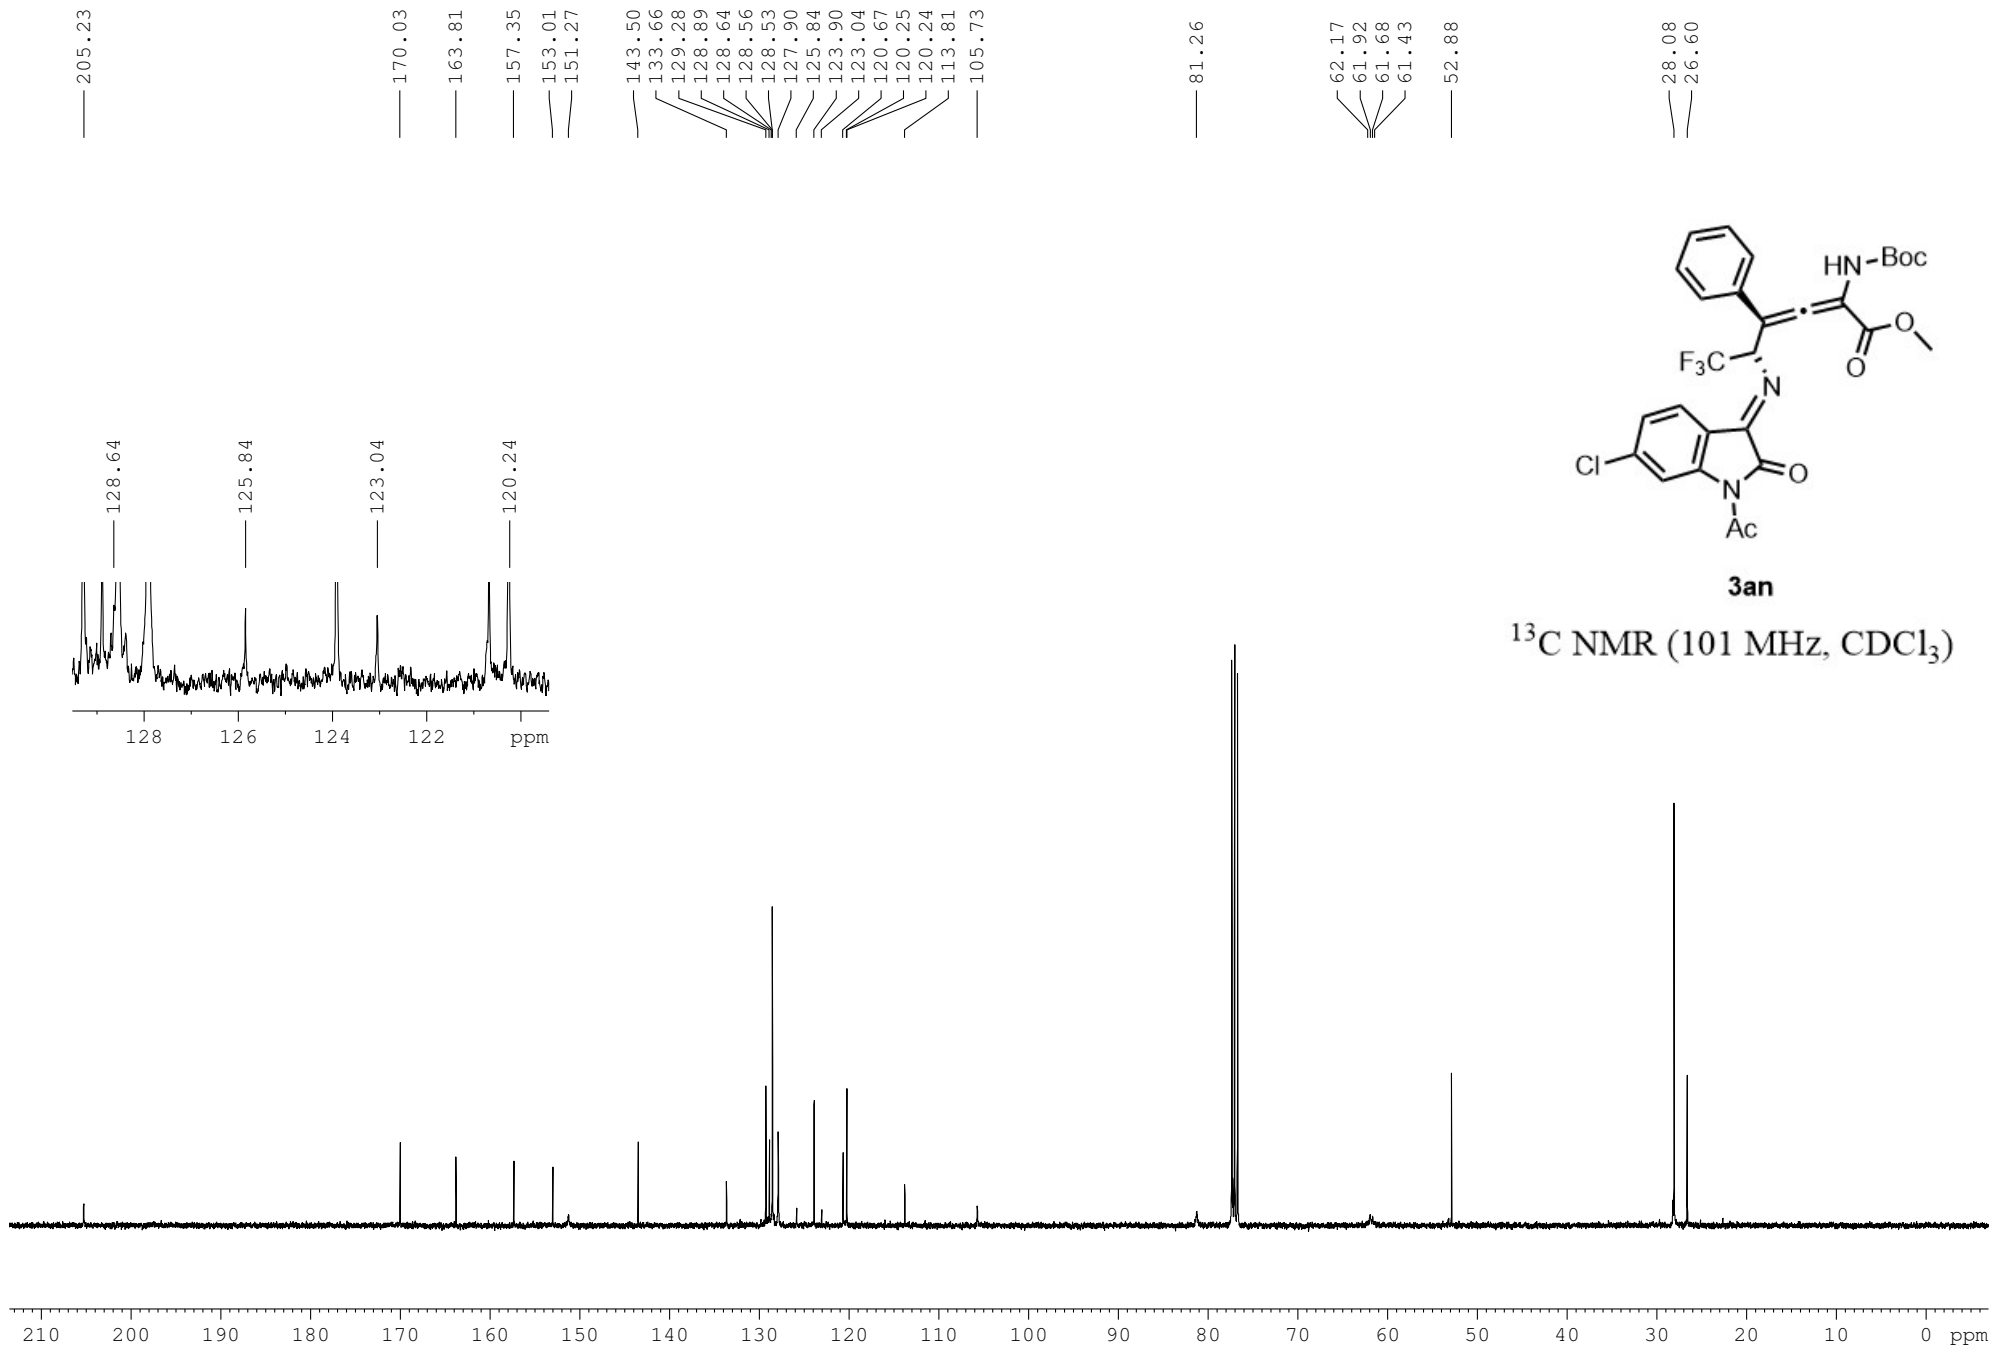

-72.81

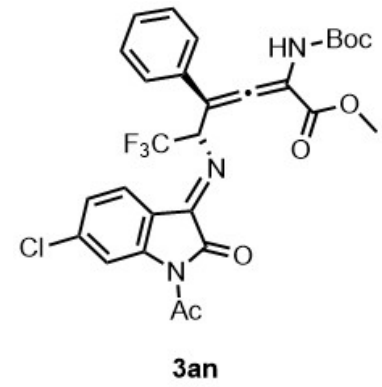

<sup>19</sup>F NMR (376 MHz, CDCl<sub>3</sub>)

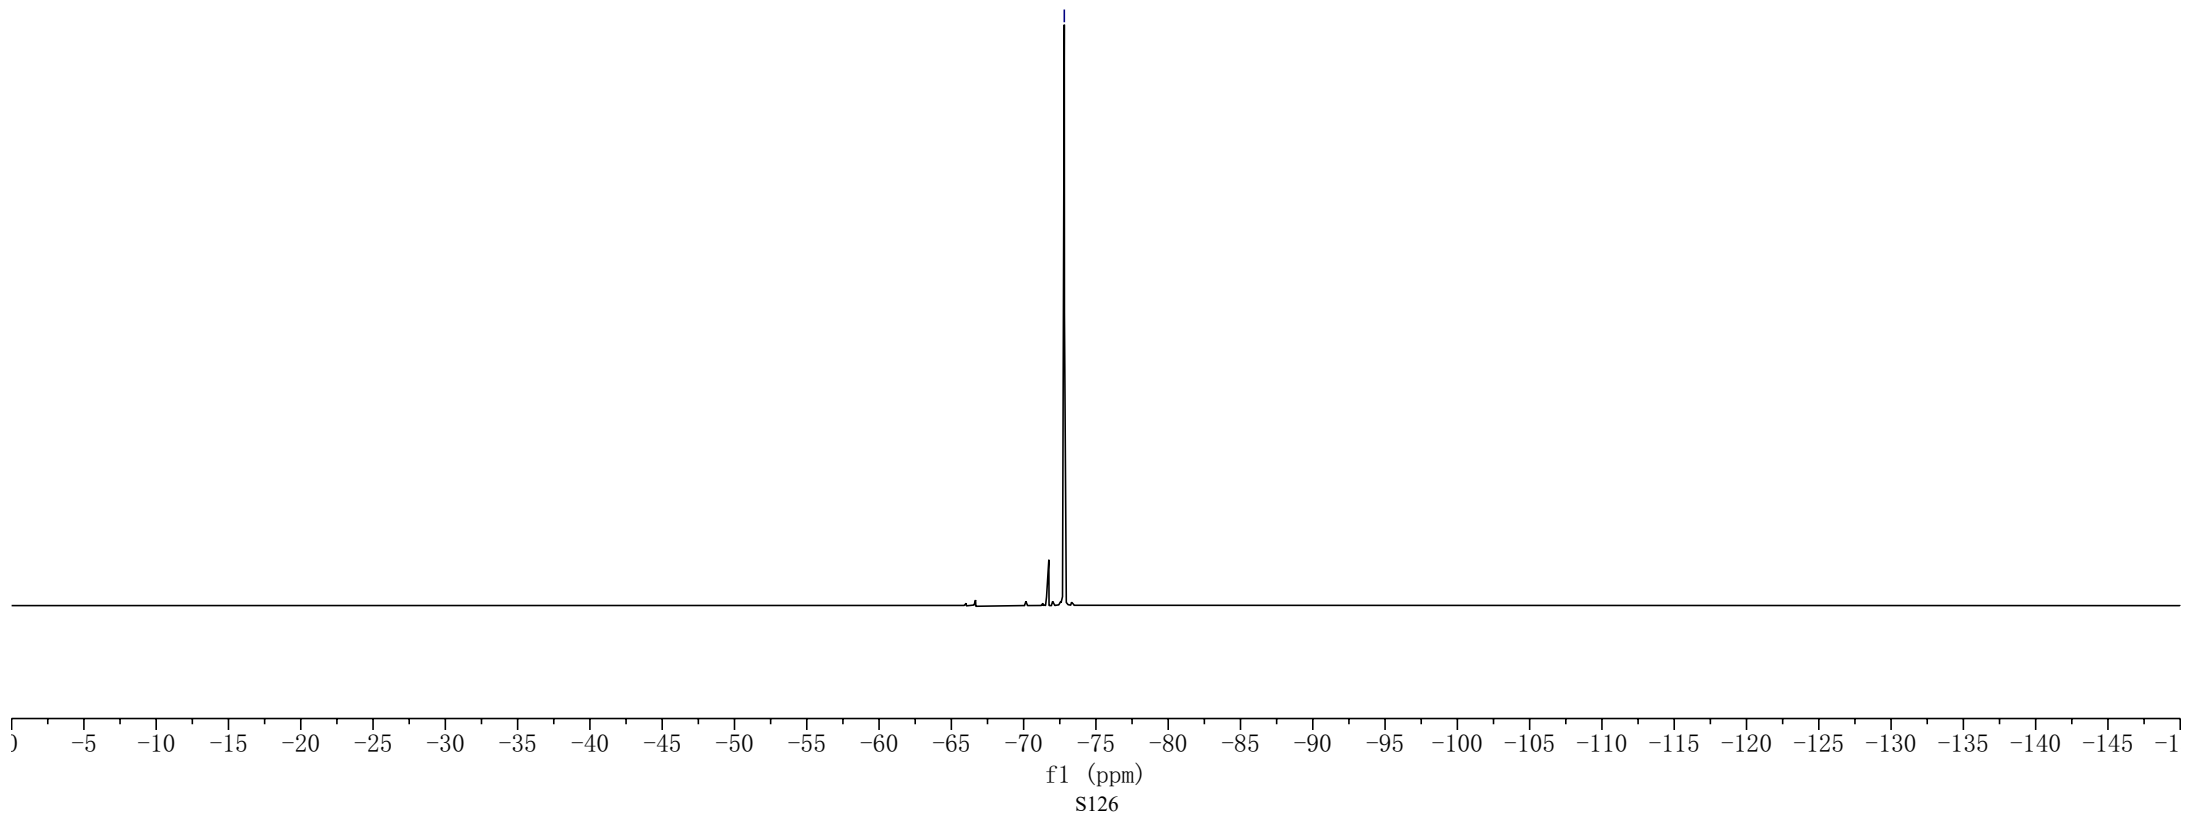

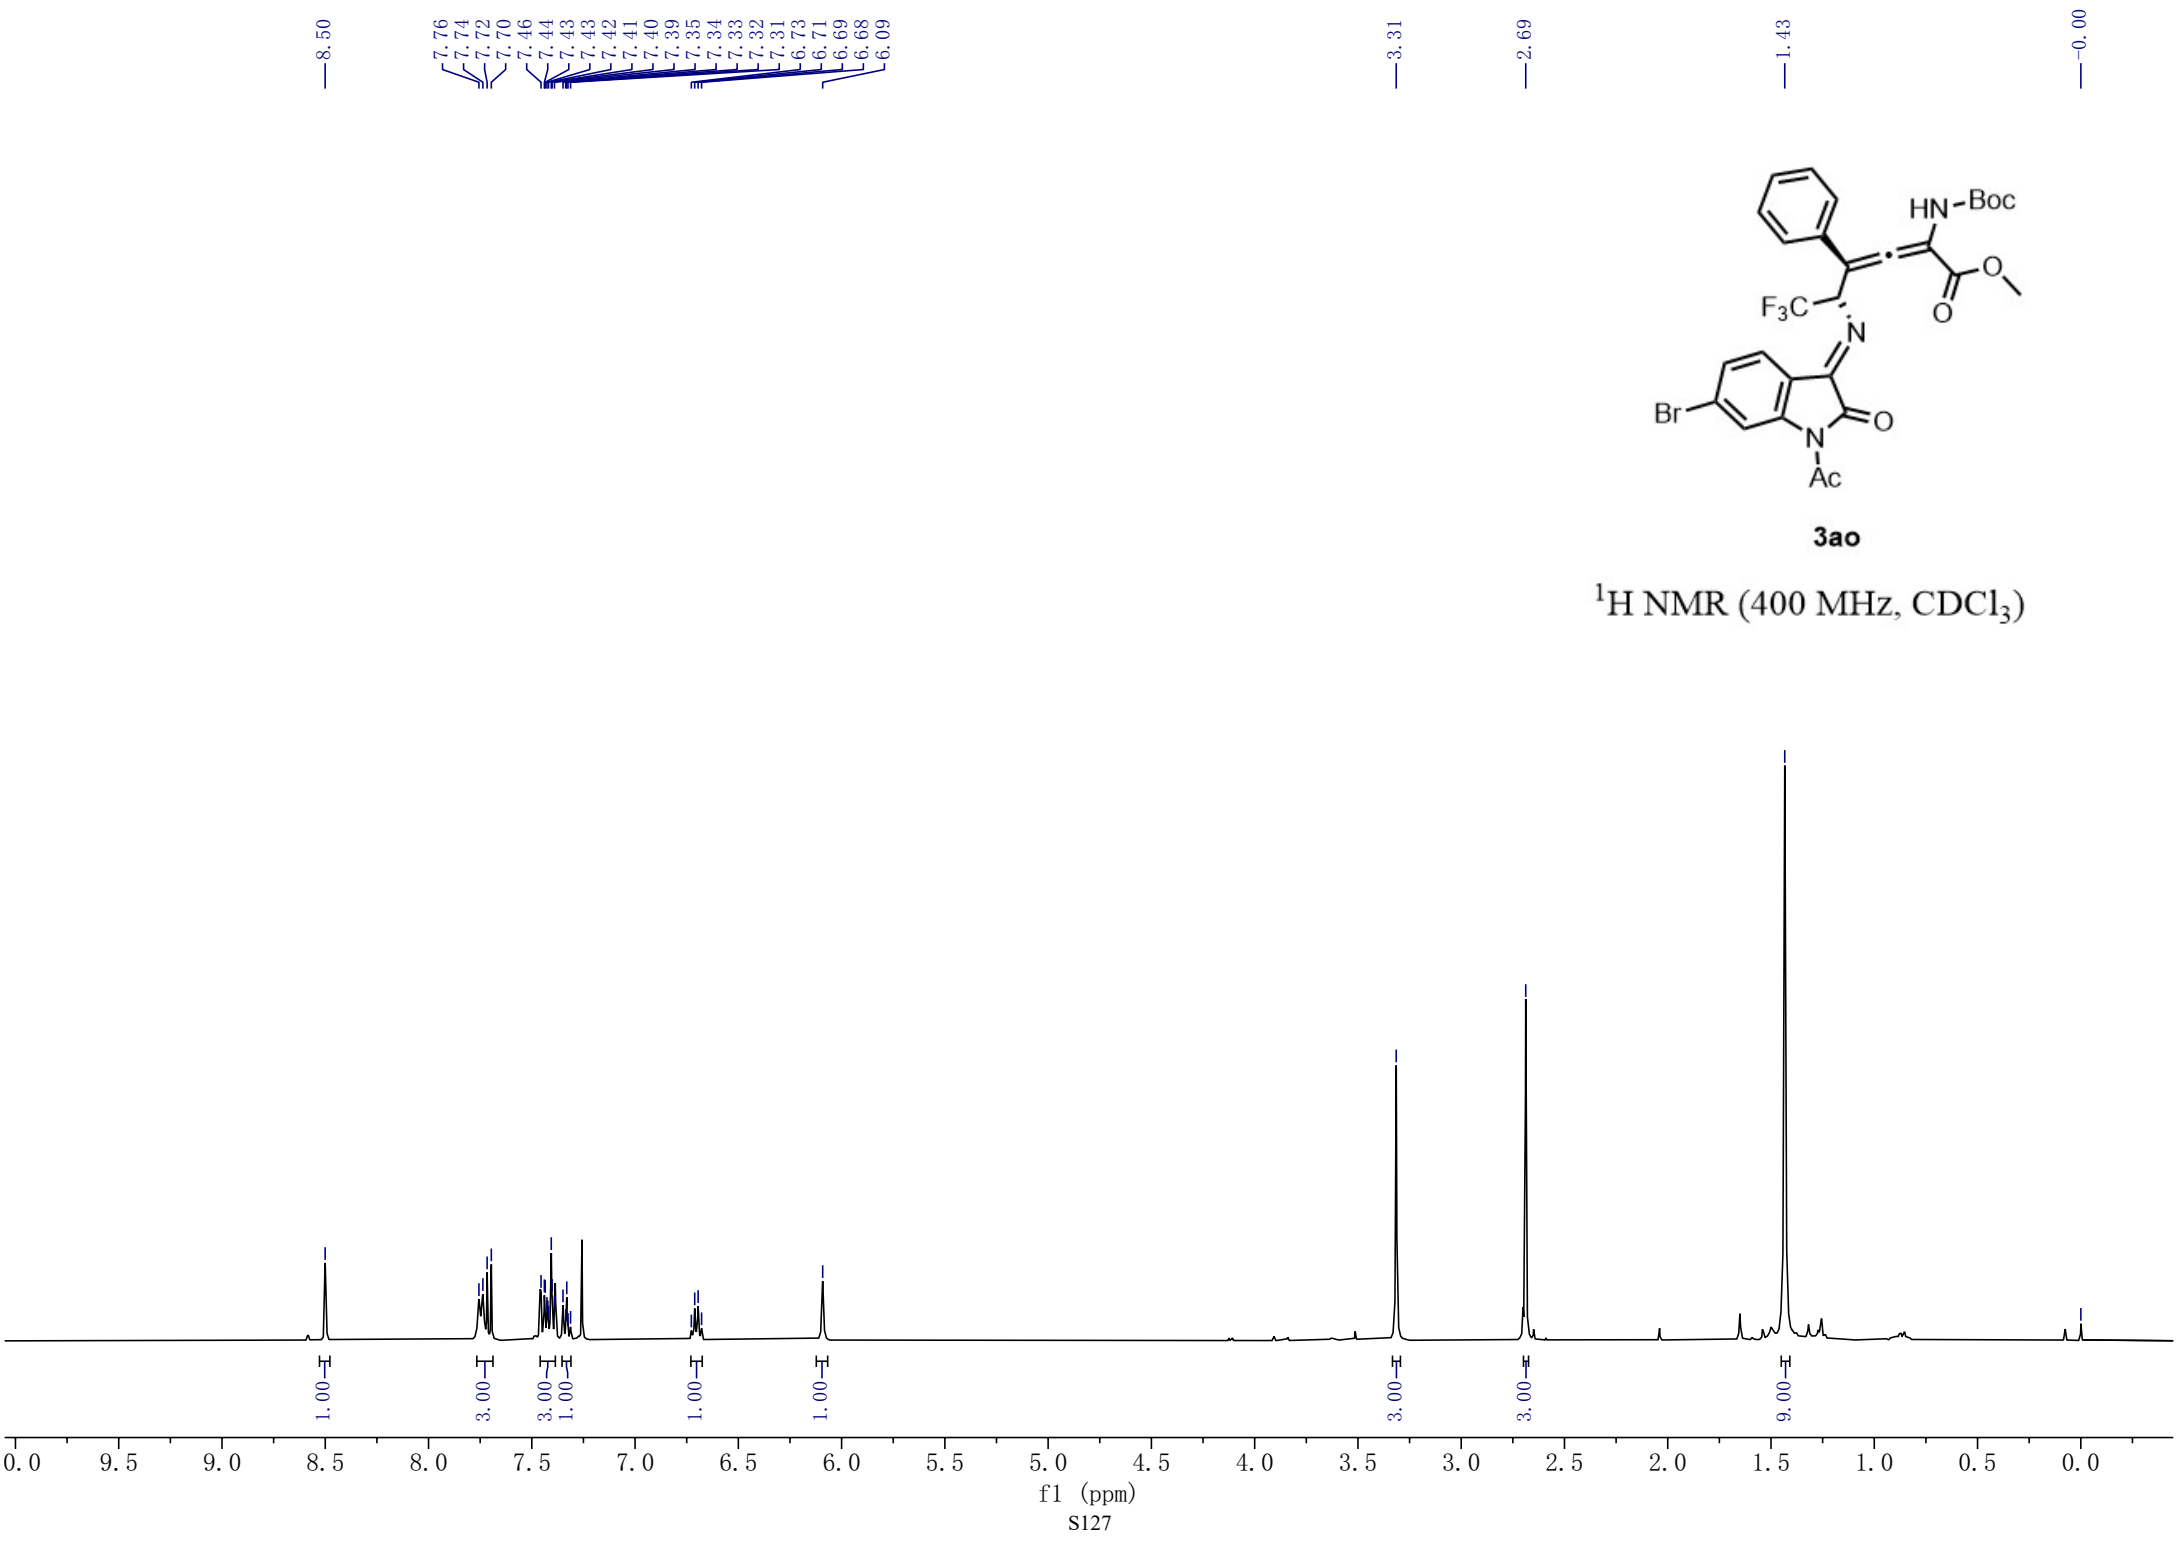

— 205.23

170.11  
170.03

— 163.82

— 157.46

152.85

151.29

143.55

140.39

133.68

128.67

128.56

128.53

127.91

126.33

125.87

123.81

123.07

120.28

120.27

117.48

113.87

— 81.28

62.19

61.89

61.59

61.29

— 52.86

29.71

28.08

26.59

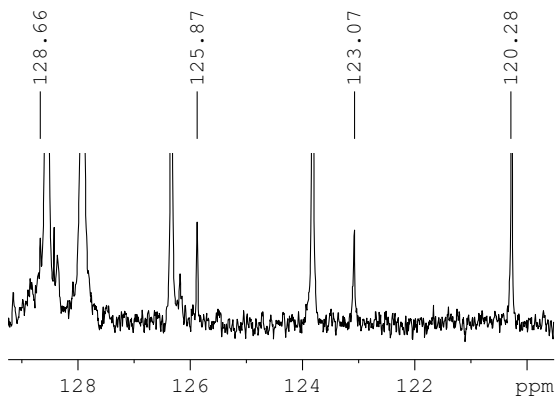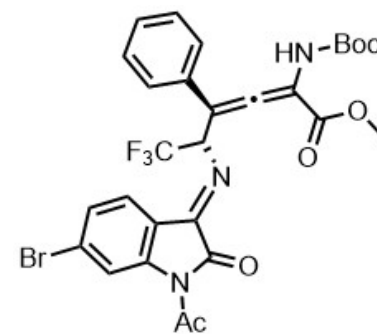

**3ao**

<sup>13</sup>C NMR (101 MHz, CDCl<sub>3</sub>)

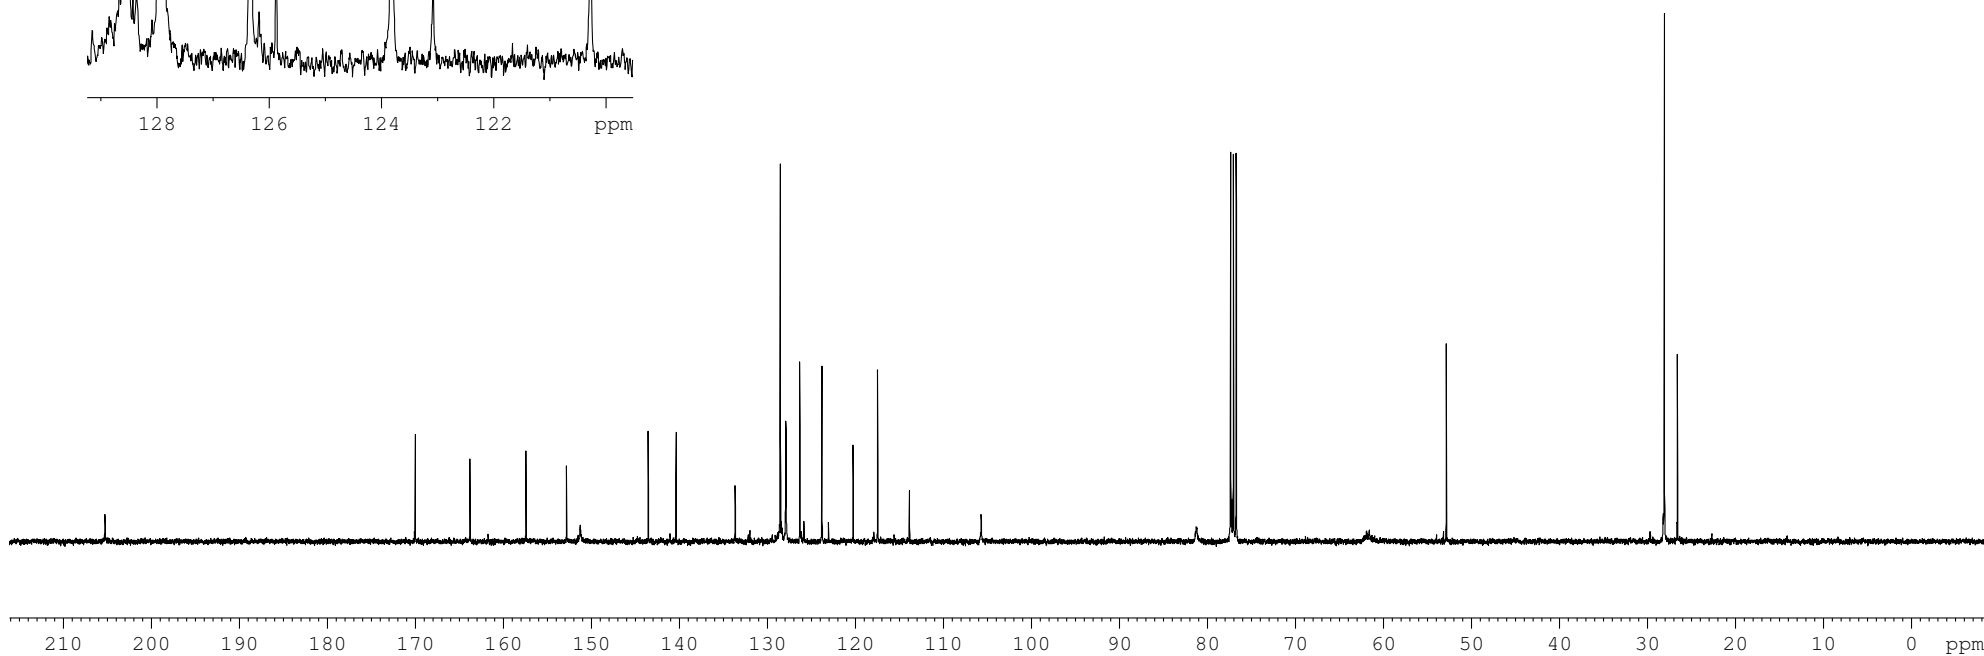



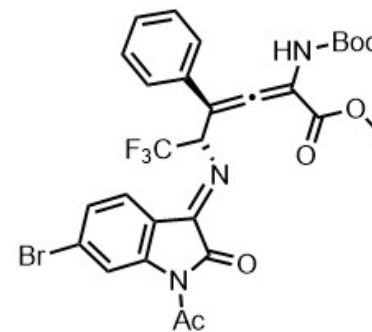

**3ao**

$^{19}\text{F}$  NMR (376 MHz,  $\text{CDCl}_3$ )

-72.81

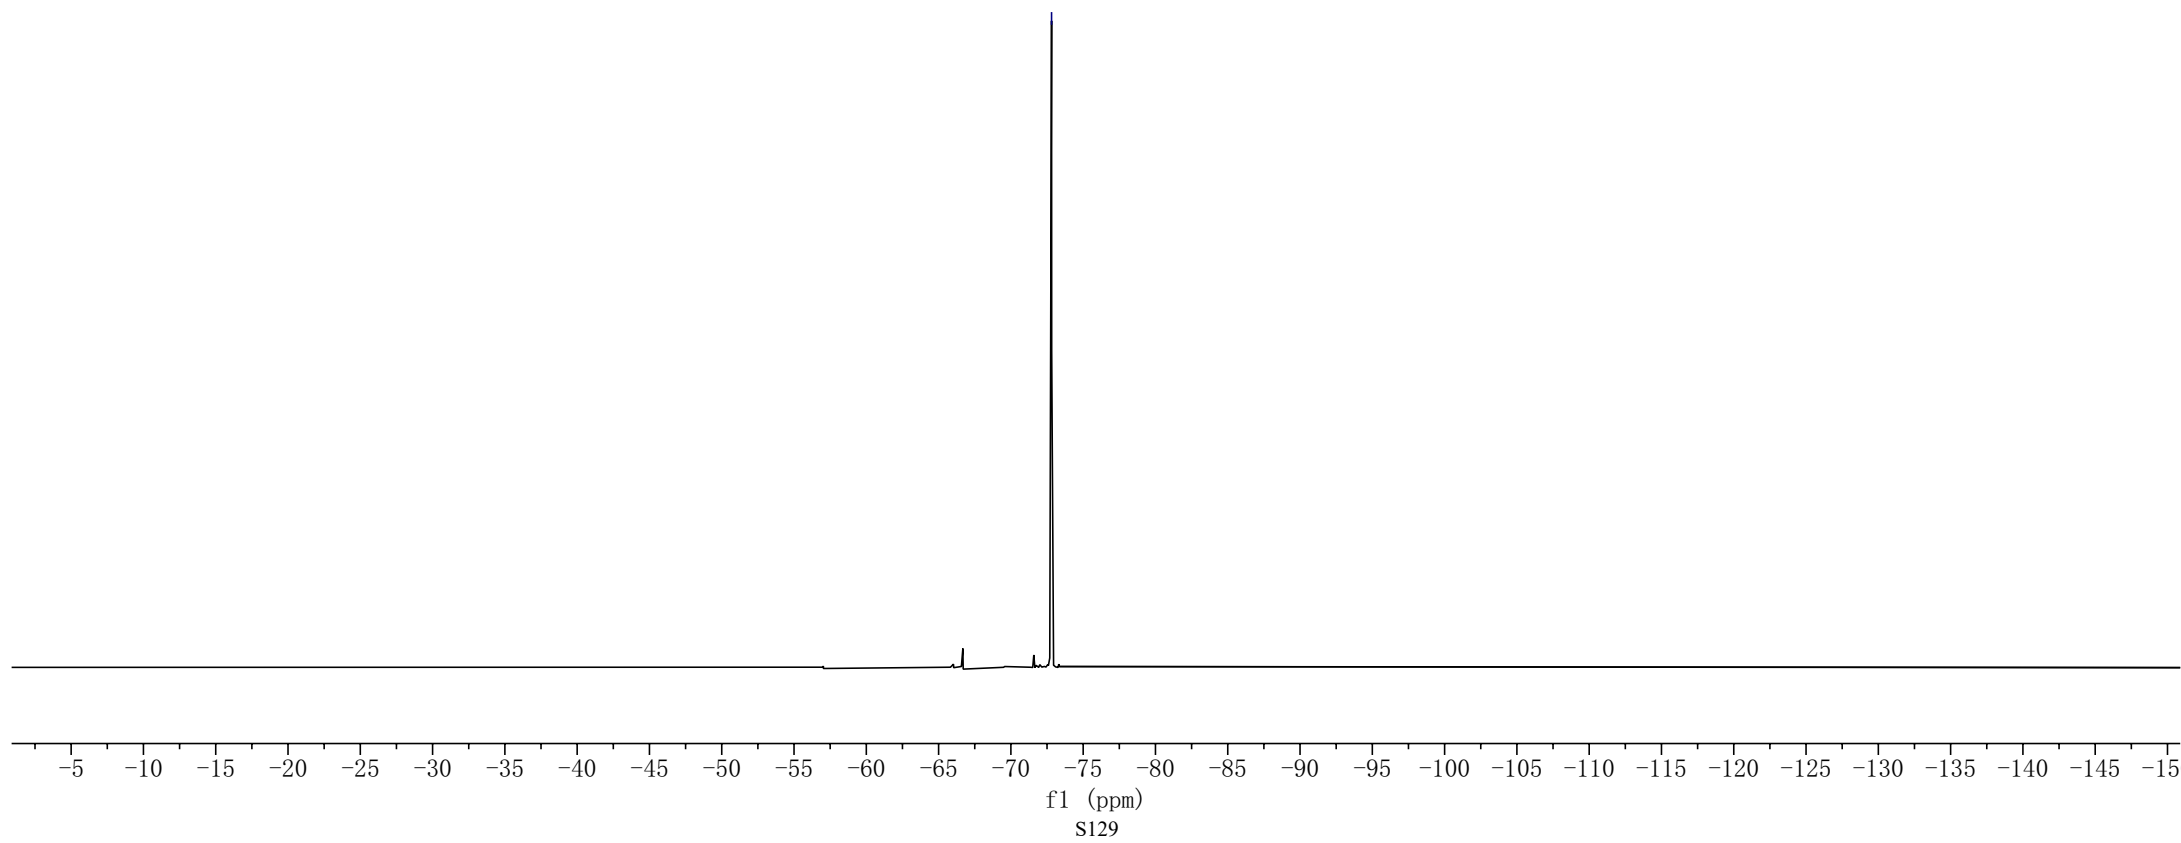

7.77  
7.75  
7.67  
7.65  
7.43  
7.42  
7.41  
7.39  
7.36  
7.34  
7.33  
7.32  
7.31  
7.30  
7.29  
7.28  
7.27  
7.26  
6.75  
6.73  
6.71  
6.70

— 6.09

— 3.30

— 2.71

— 1.44

— 0.00

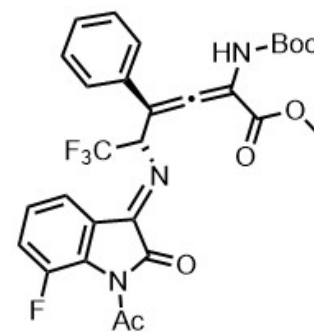

**3ap**

<sup>1</sup>H NMR (400 MHz, CDCl<sub>3</sub>)

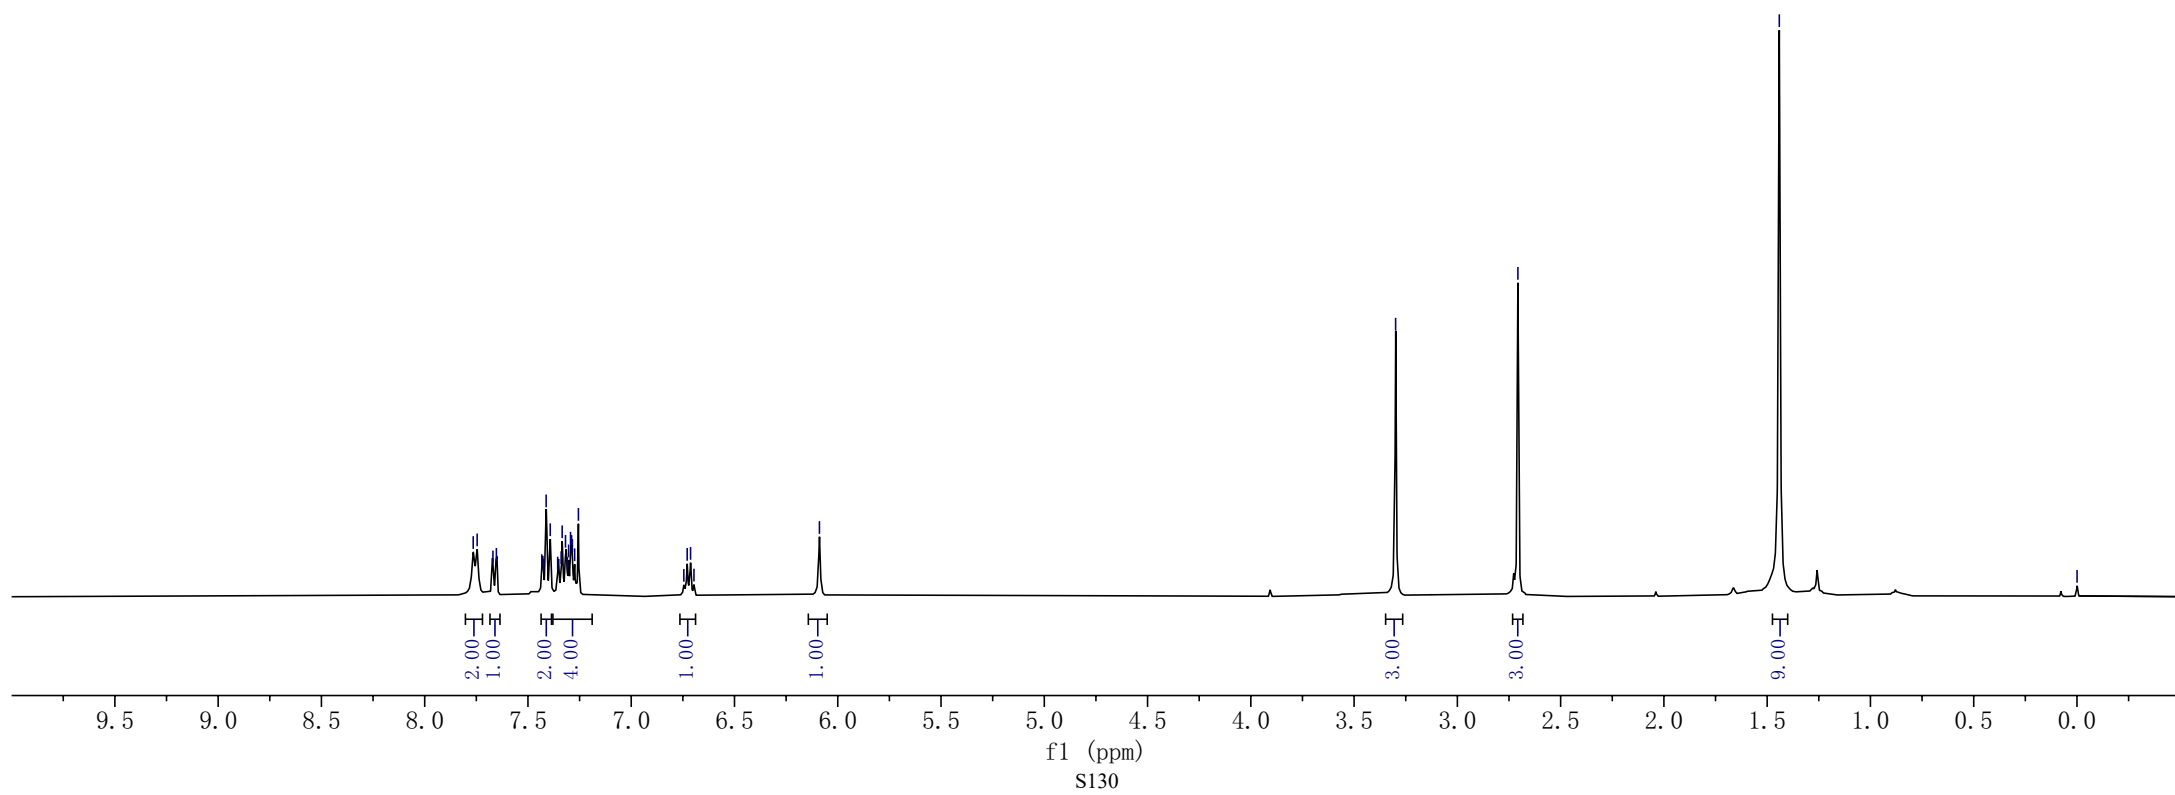

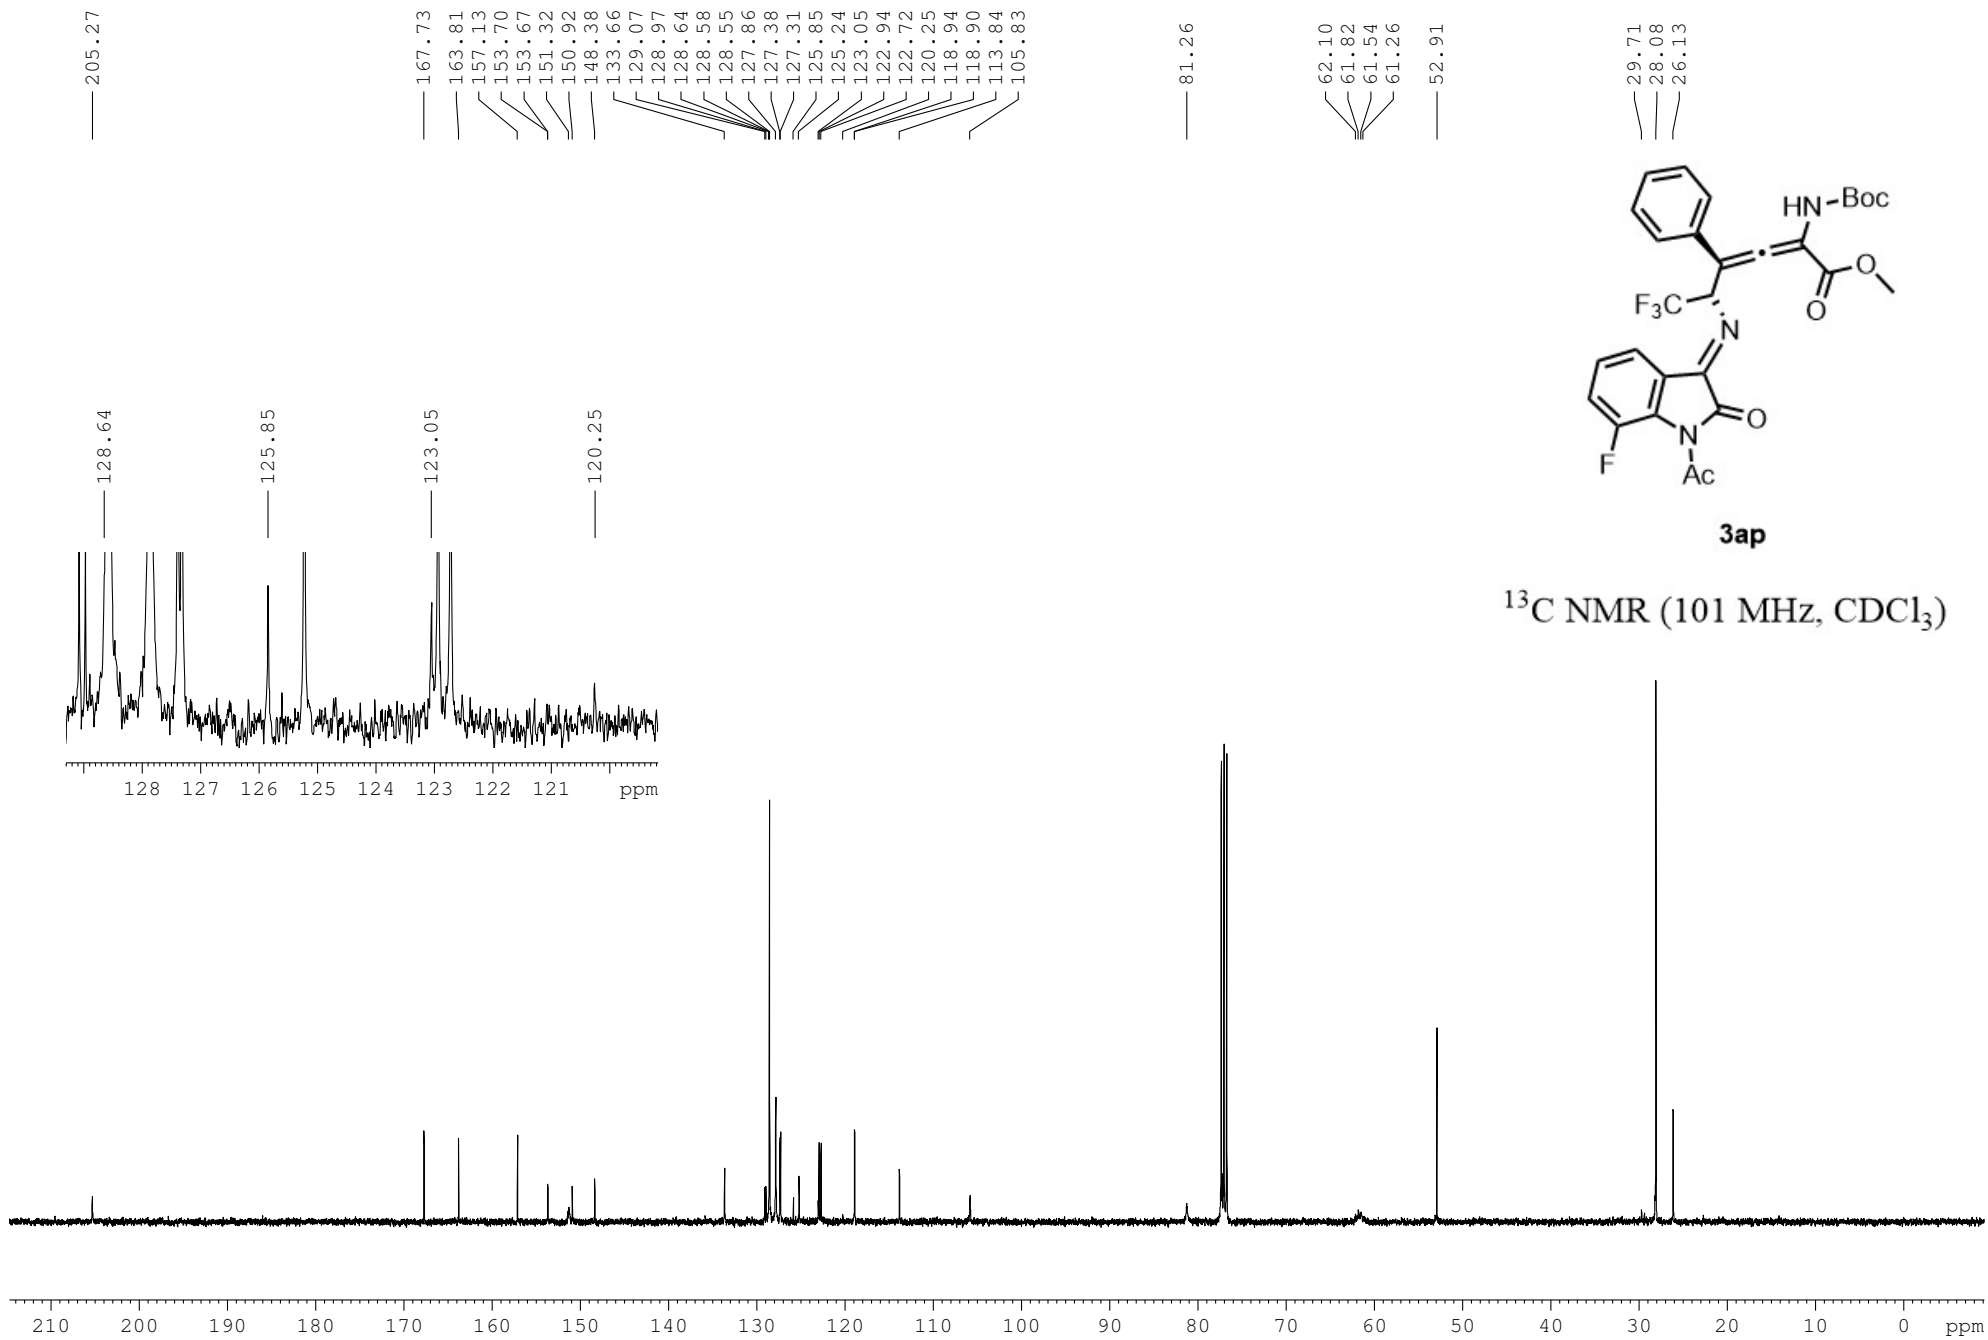

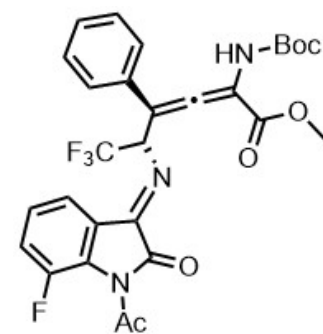

**3ap**

$^{19}\text{F}$  NMR (376 MHz,  $\text{CDCl}_3$ )

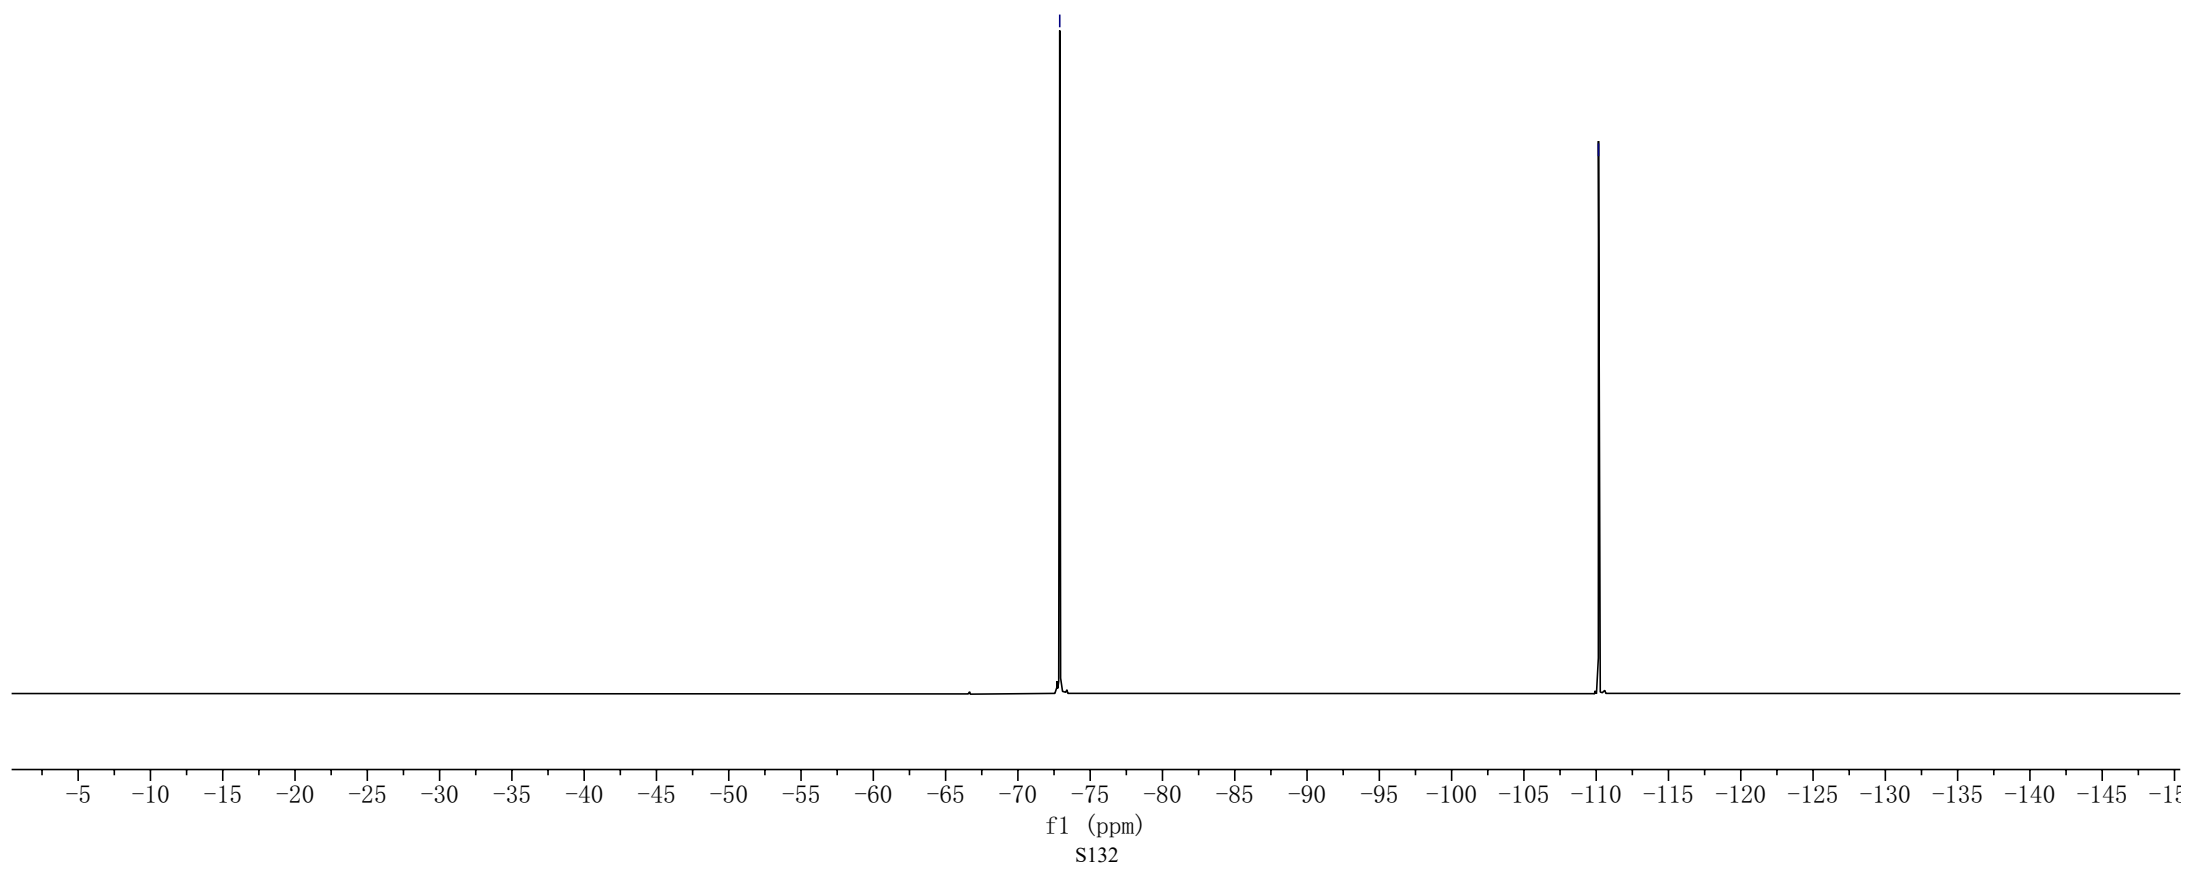

8.15  
8.13  
7.49  
7.48  
7.47  
7.46  
7.45  
7.44  
7.43  
7.42  
7.41  
7.34  
7.32  
7.15  
7.14  
7.13  
7.12

5.92  
5.90

5.00  
4.98

3.59

1.41

0.98

-0.00

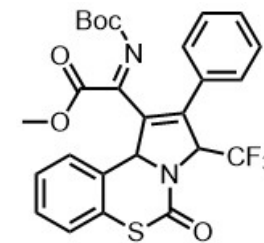

**4aa**

<sup>1</sup>H NMR (400 MHz, CDCl<sub>3</sub>)

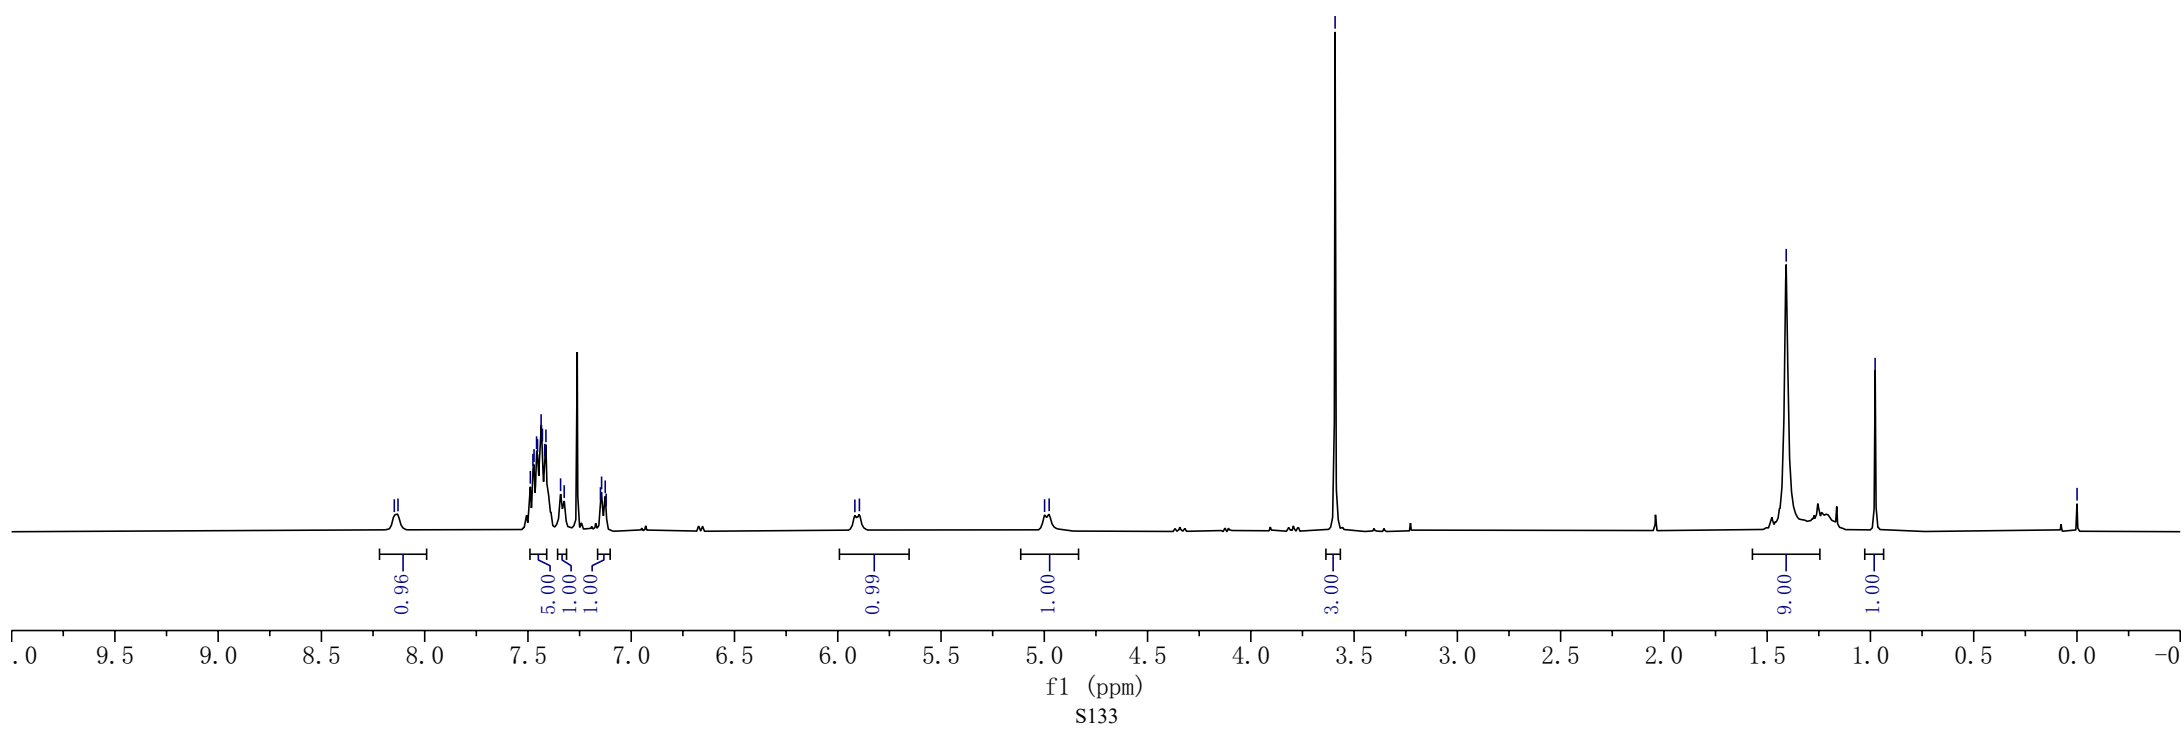

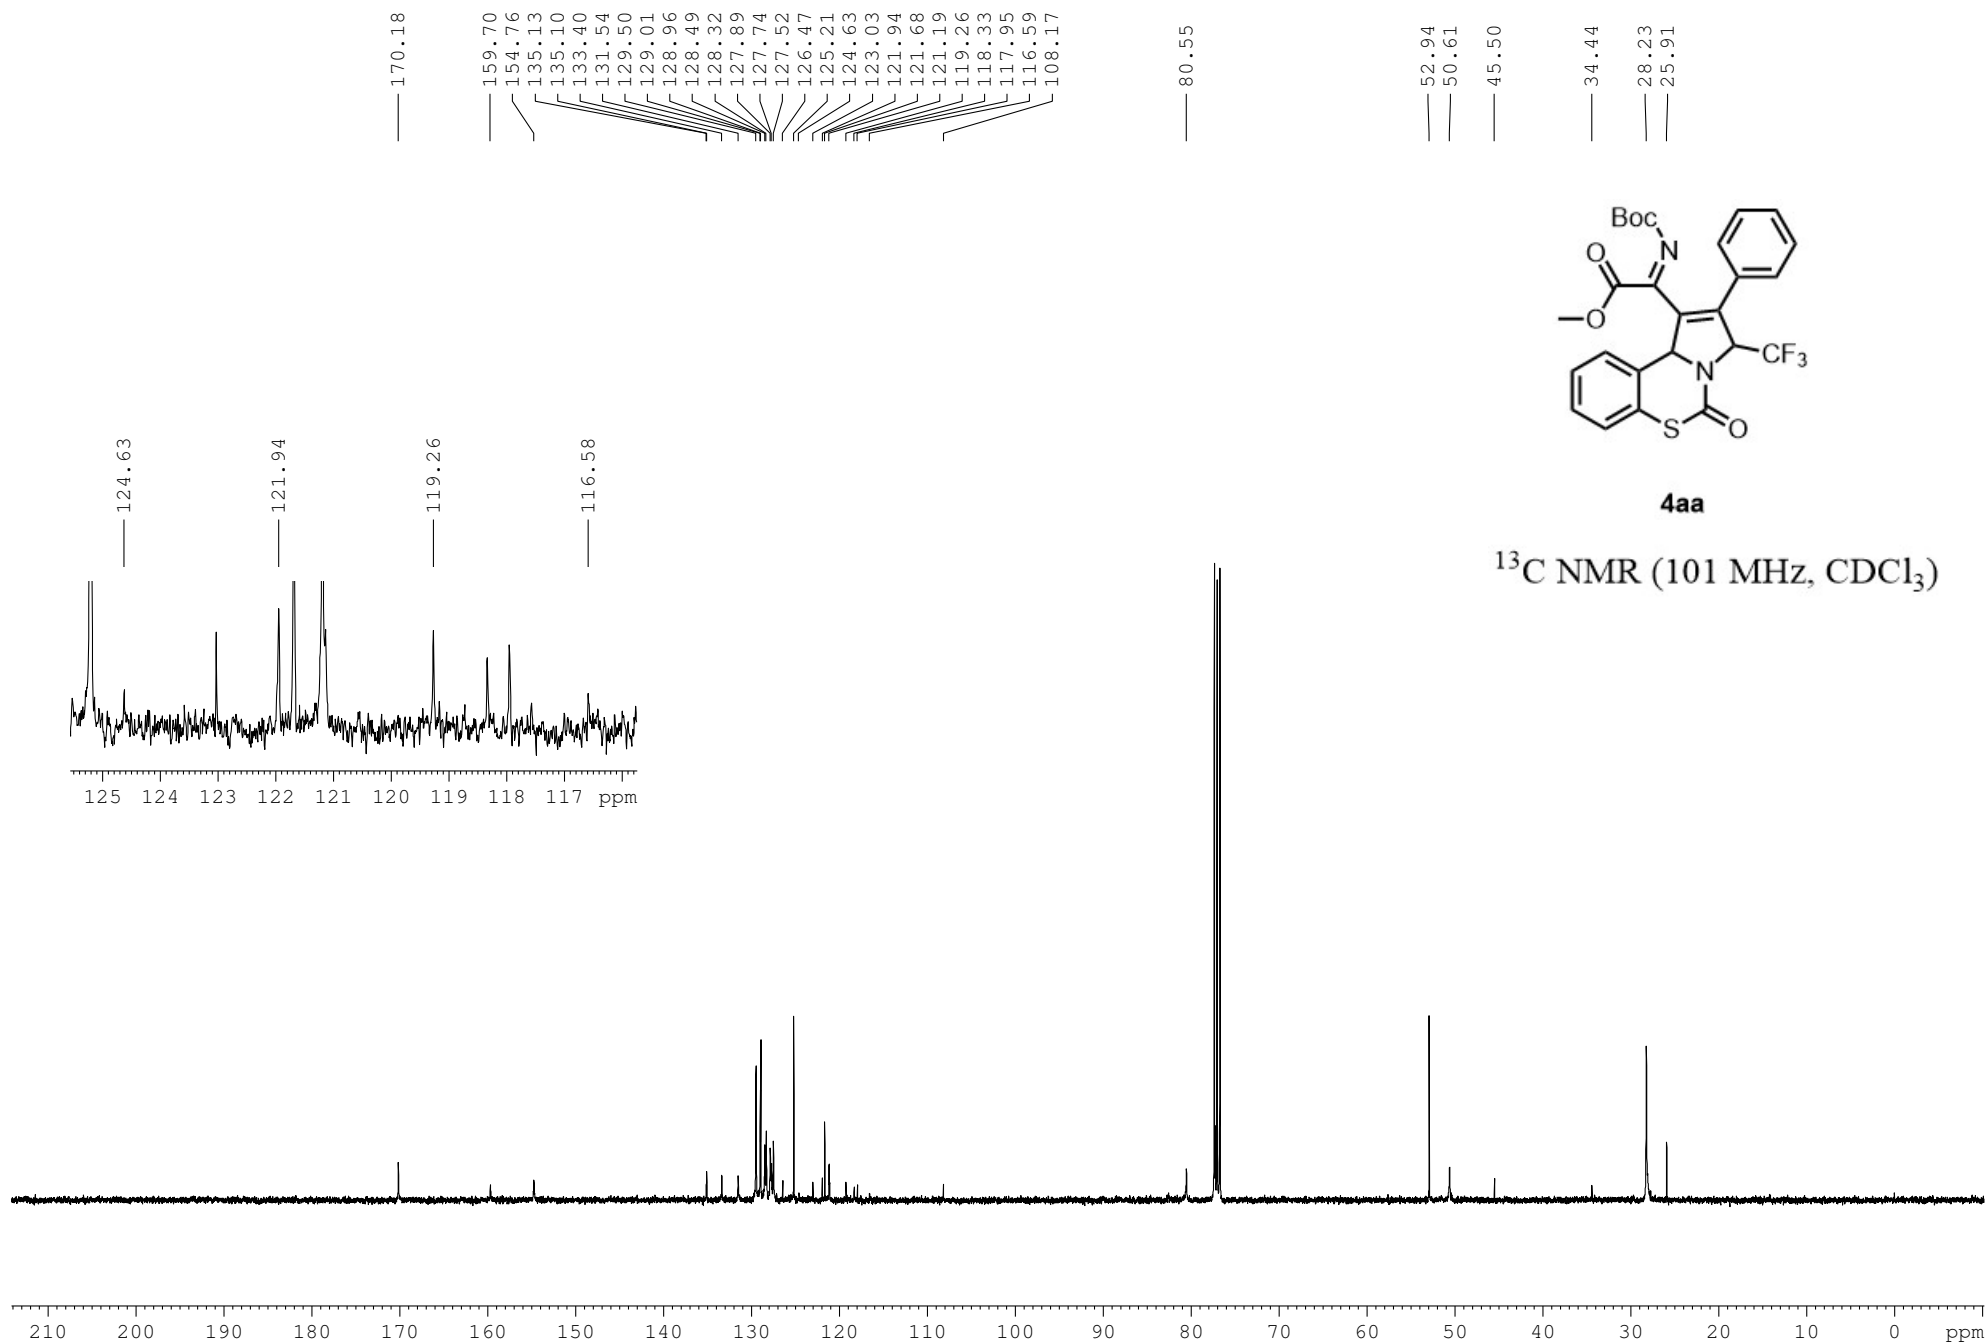

-52.14

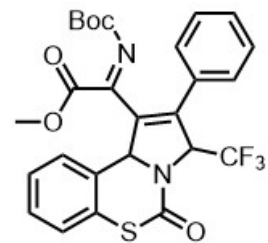

**4aa**

$^{19}\text{F}$  NMR (376 MHz,  $\text{CDCl}_3$ )

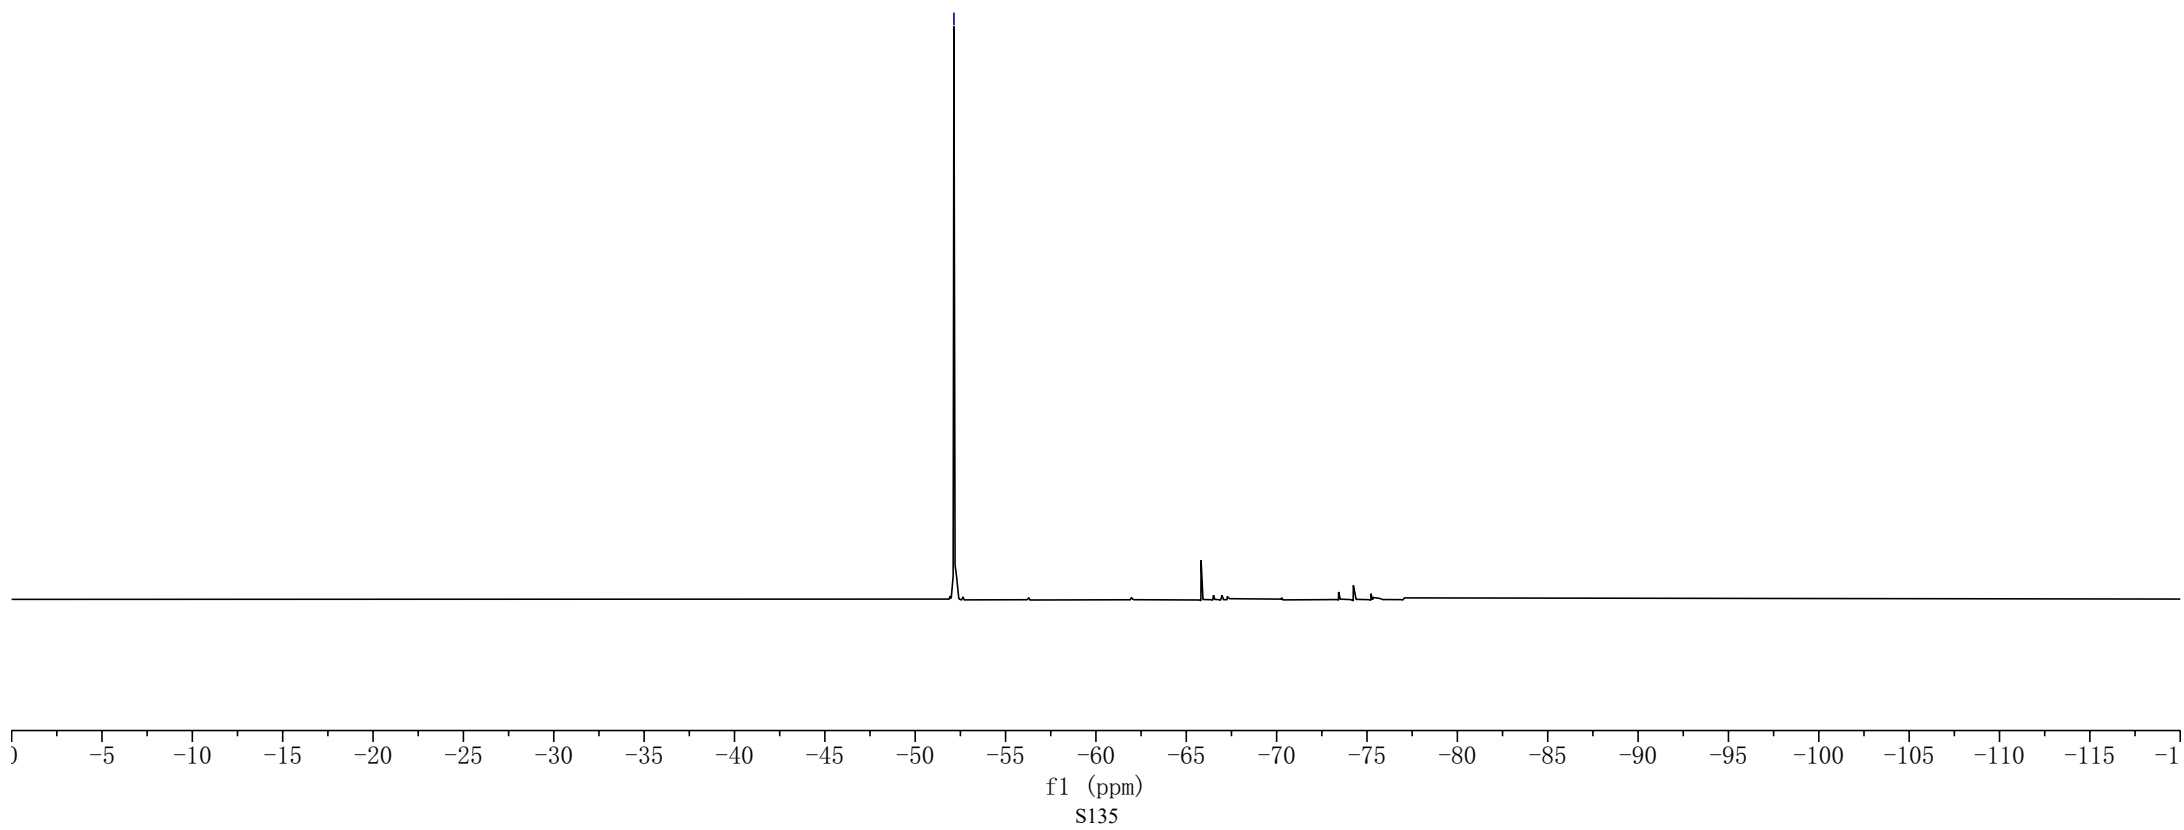

8.15  
8.14  
8.13  
7.48  
7.47  
7.46  
7.45  
7.44  
7.43  
7.41  
7.40  
7.35  
7.34  
7.33  
7.17  
7.15

5.88  
5.86

4.97  
4.95

4.09  
4.08  
4.06  
4.04  
4.02

1.39  
1.19  
1.17  
1.16

-0.00

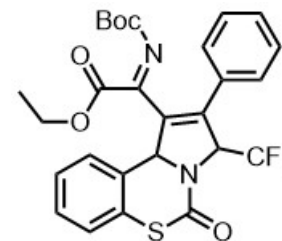

**4ba**

$^1\text{H NMR}$  (400 MHz,  $\text{CDCl}_3$ )

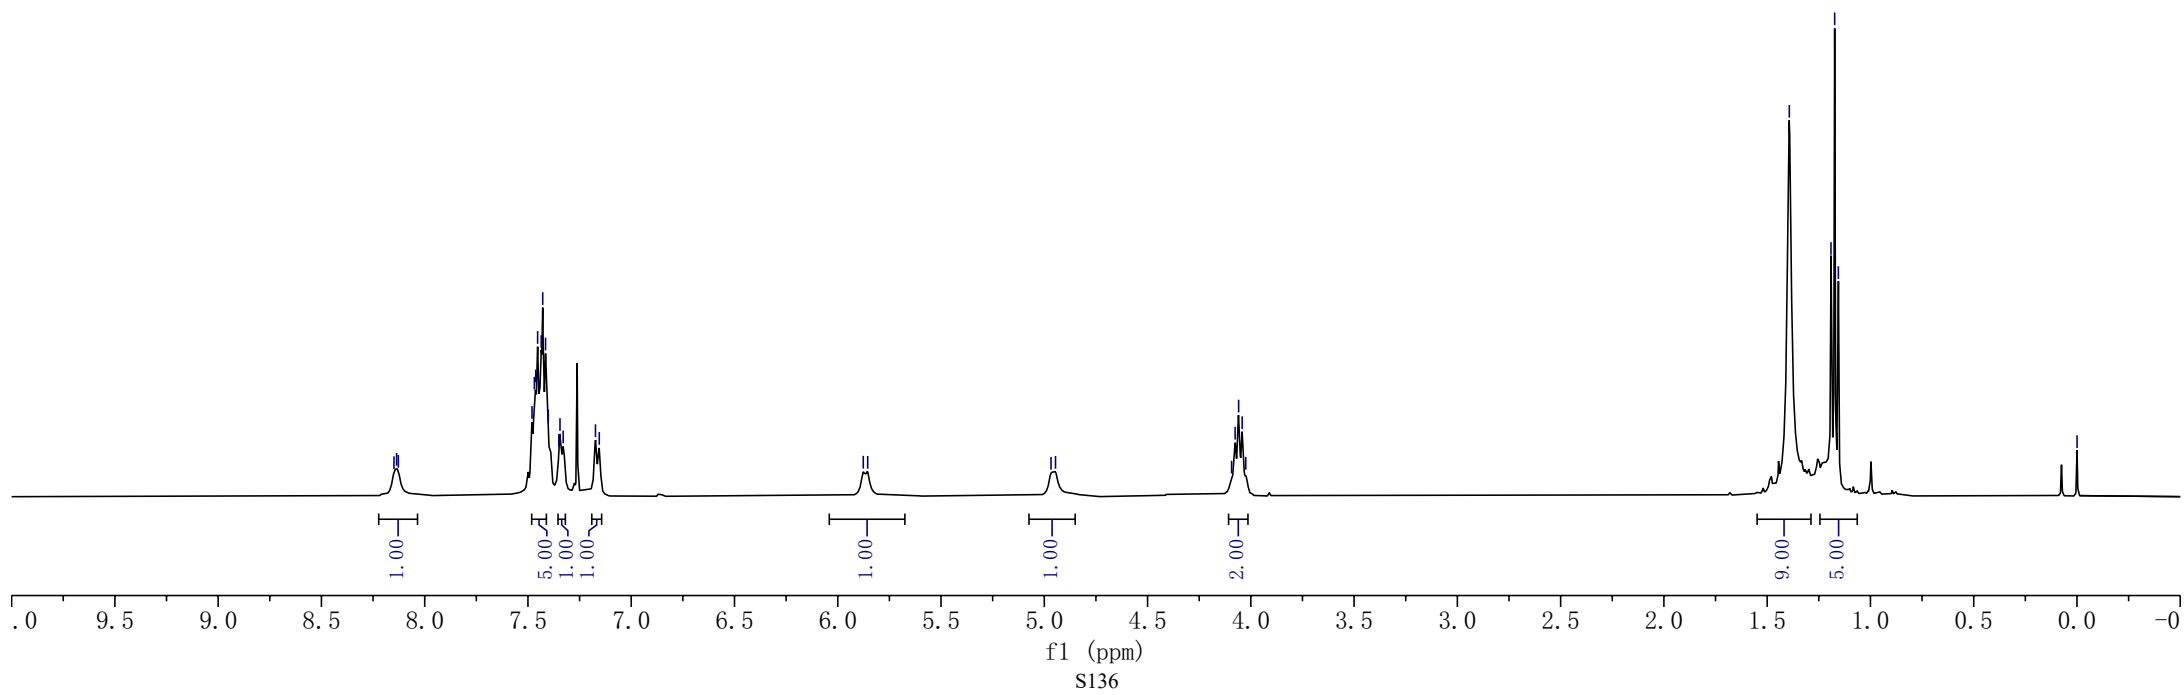



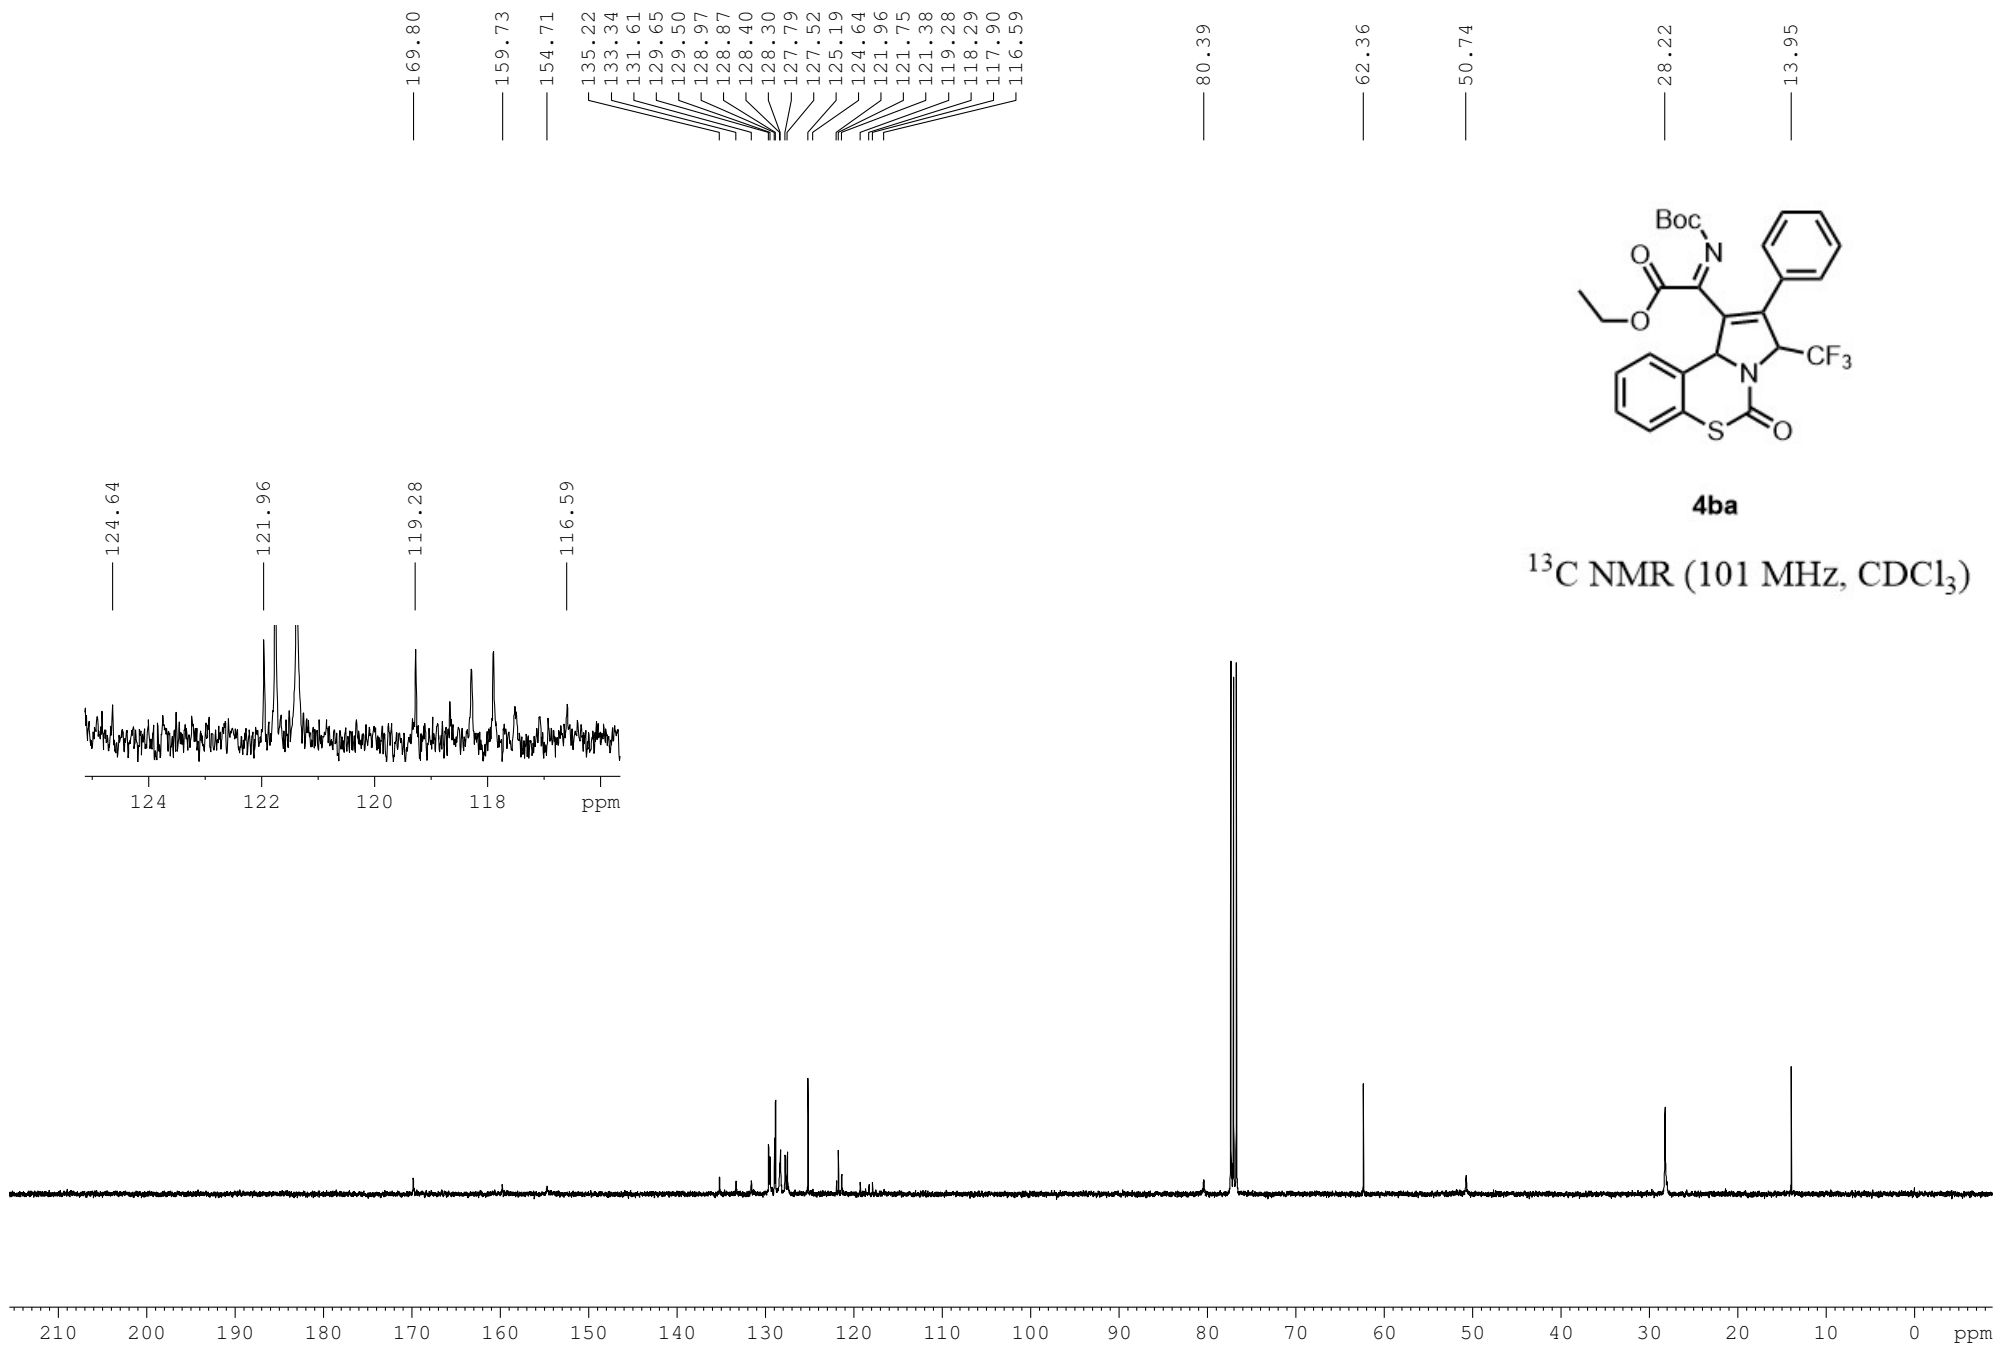

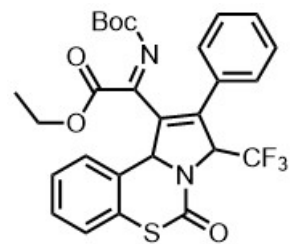

**4ba**

$^{19}\text{F}$  NMR (376 MHz,  $\text{CDCl}_3$ )

—52.11

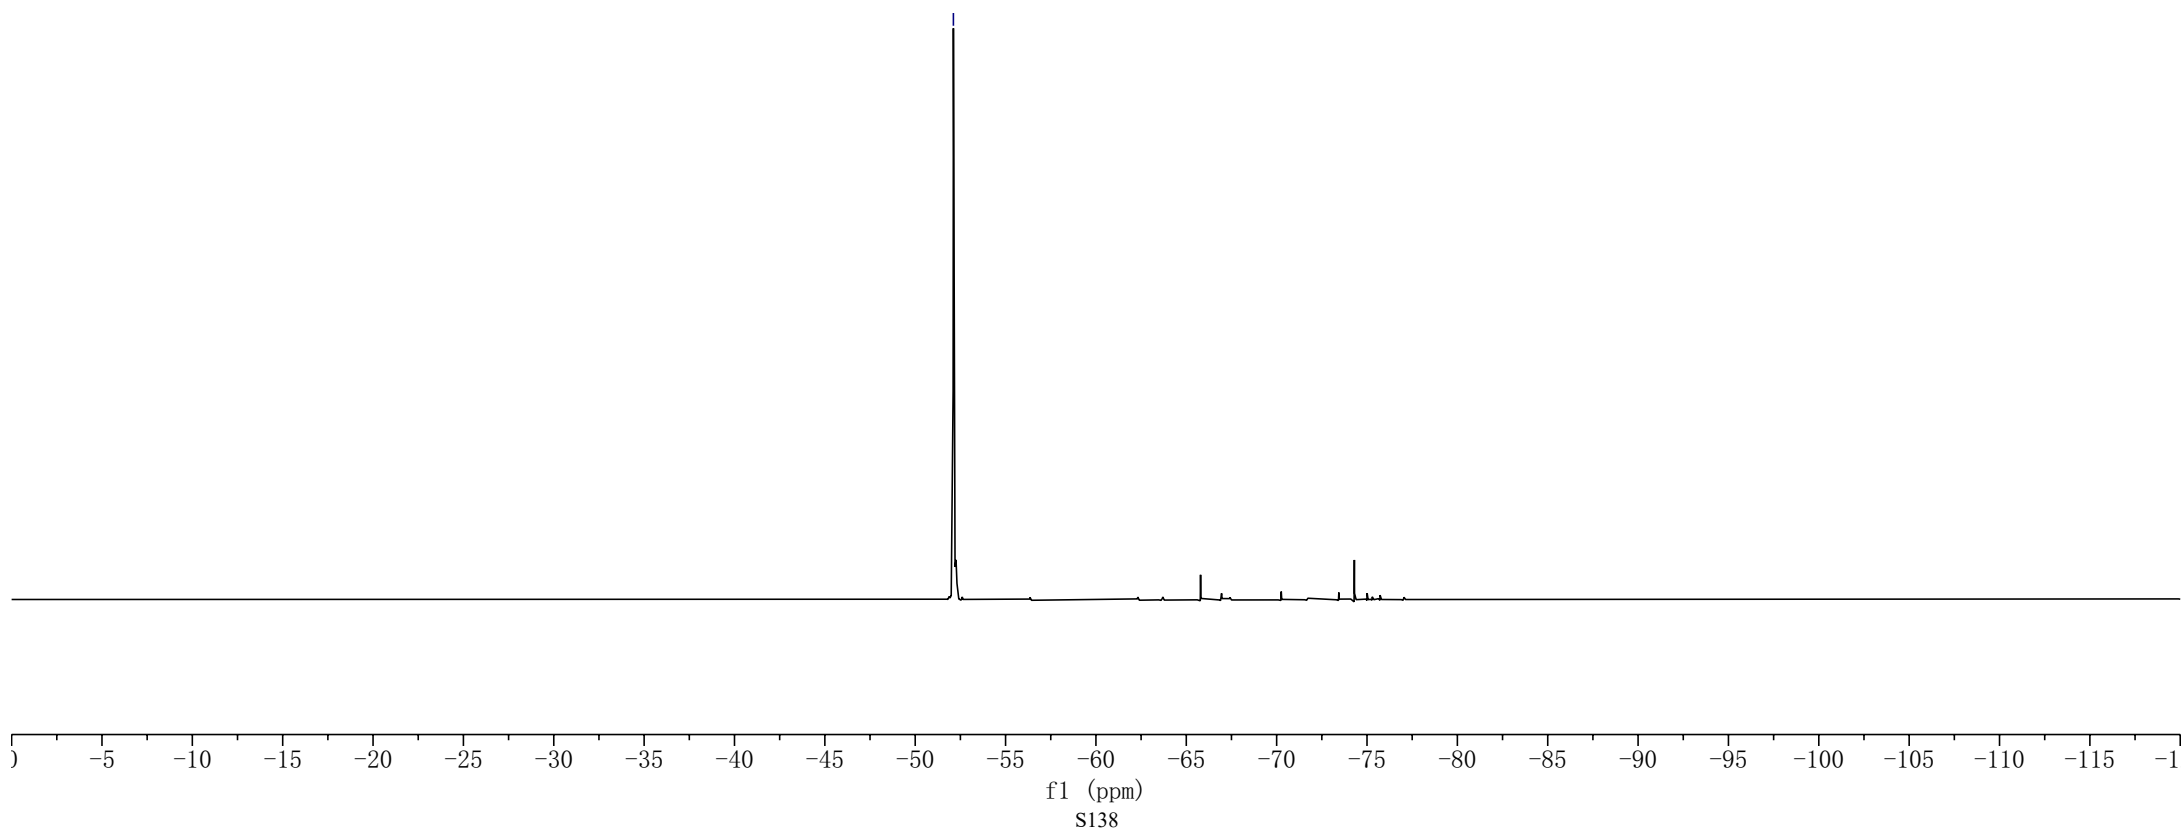

8.12  
8.11  
7.47  
7.46  
7.45  
7.44  
7.43  
7.42  
7.41  
7.40  
7.35  
7.34  
7.33  
7.21  
7.19

5.83  
5.81

4.98  
4.96  
4.95  
4.93  
4.91  
4.90

1.37  
1.20  
1.18  
1.17

-0.00

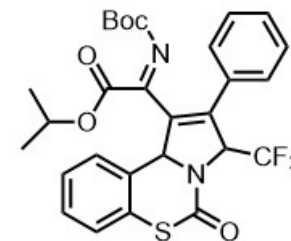

**4ca**

<sup>1</sup>H NMR (400 MHz, CDCl<sub>3</sub>)

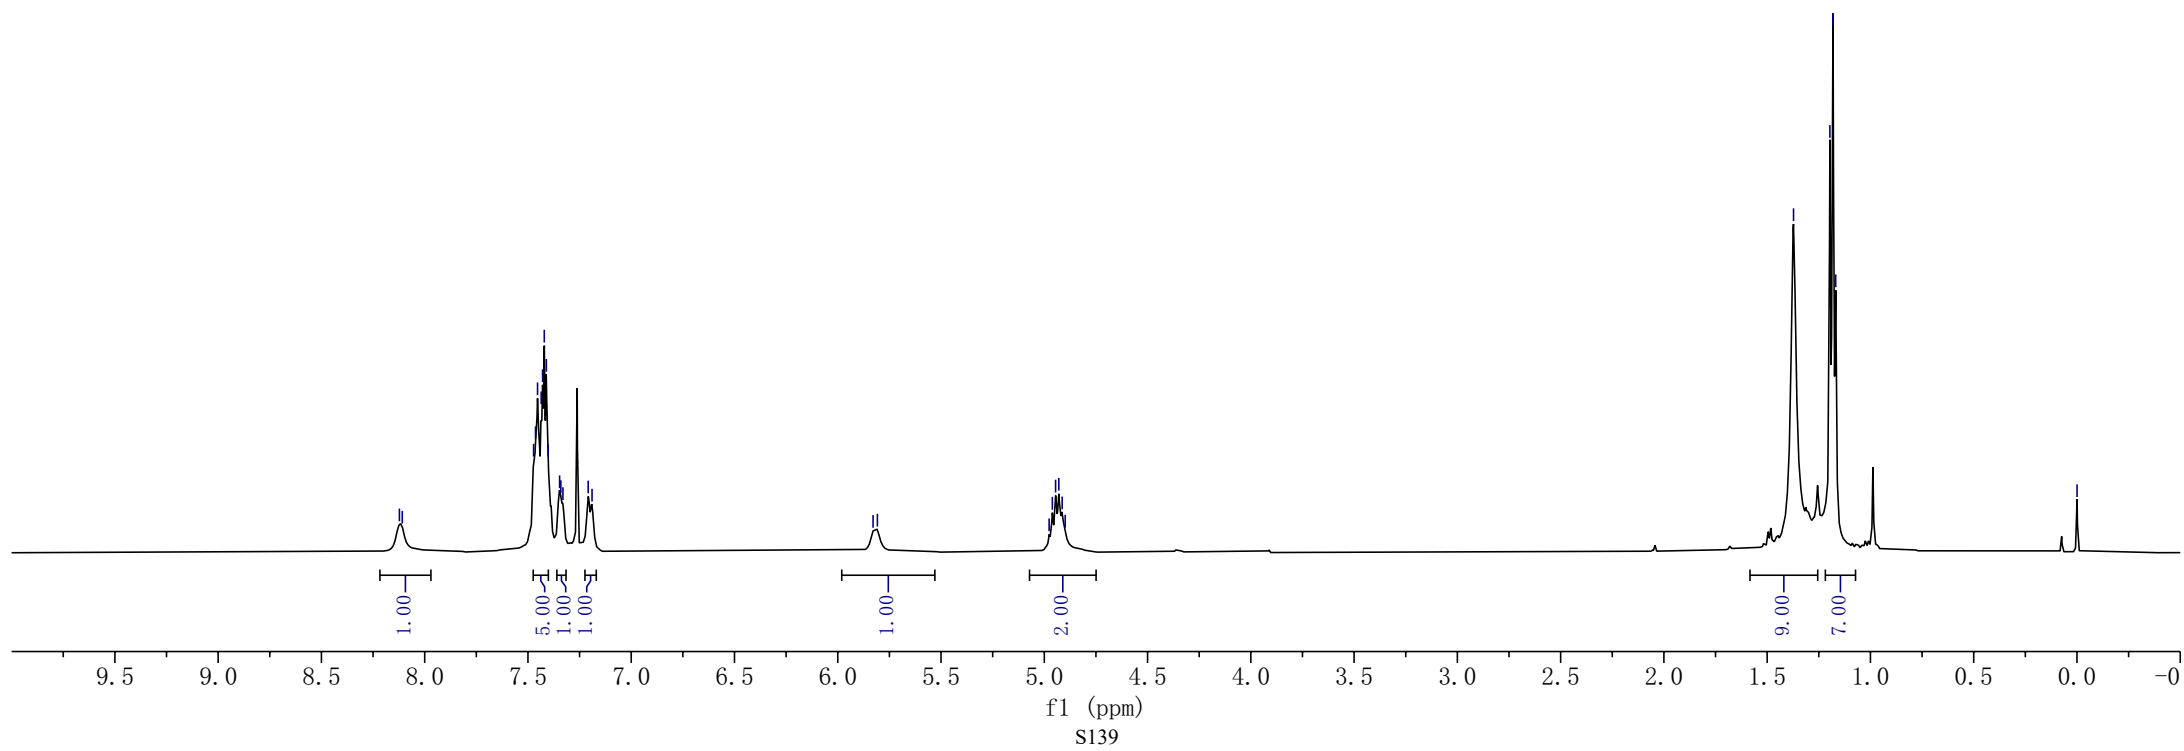

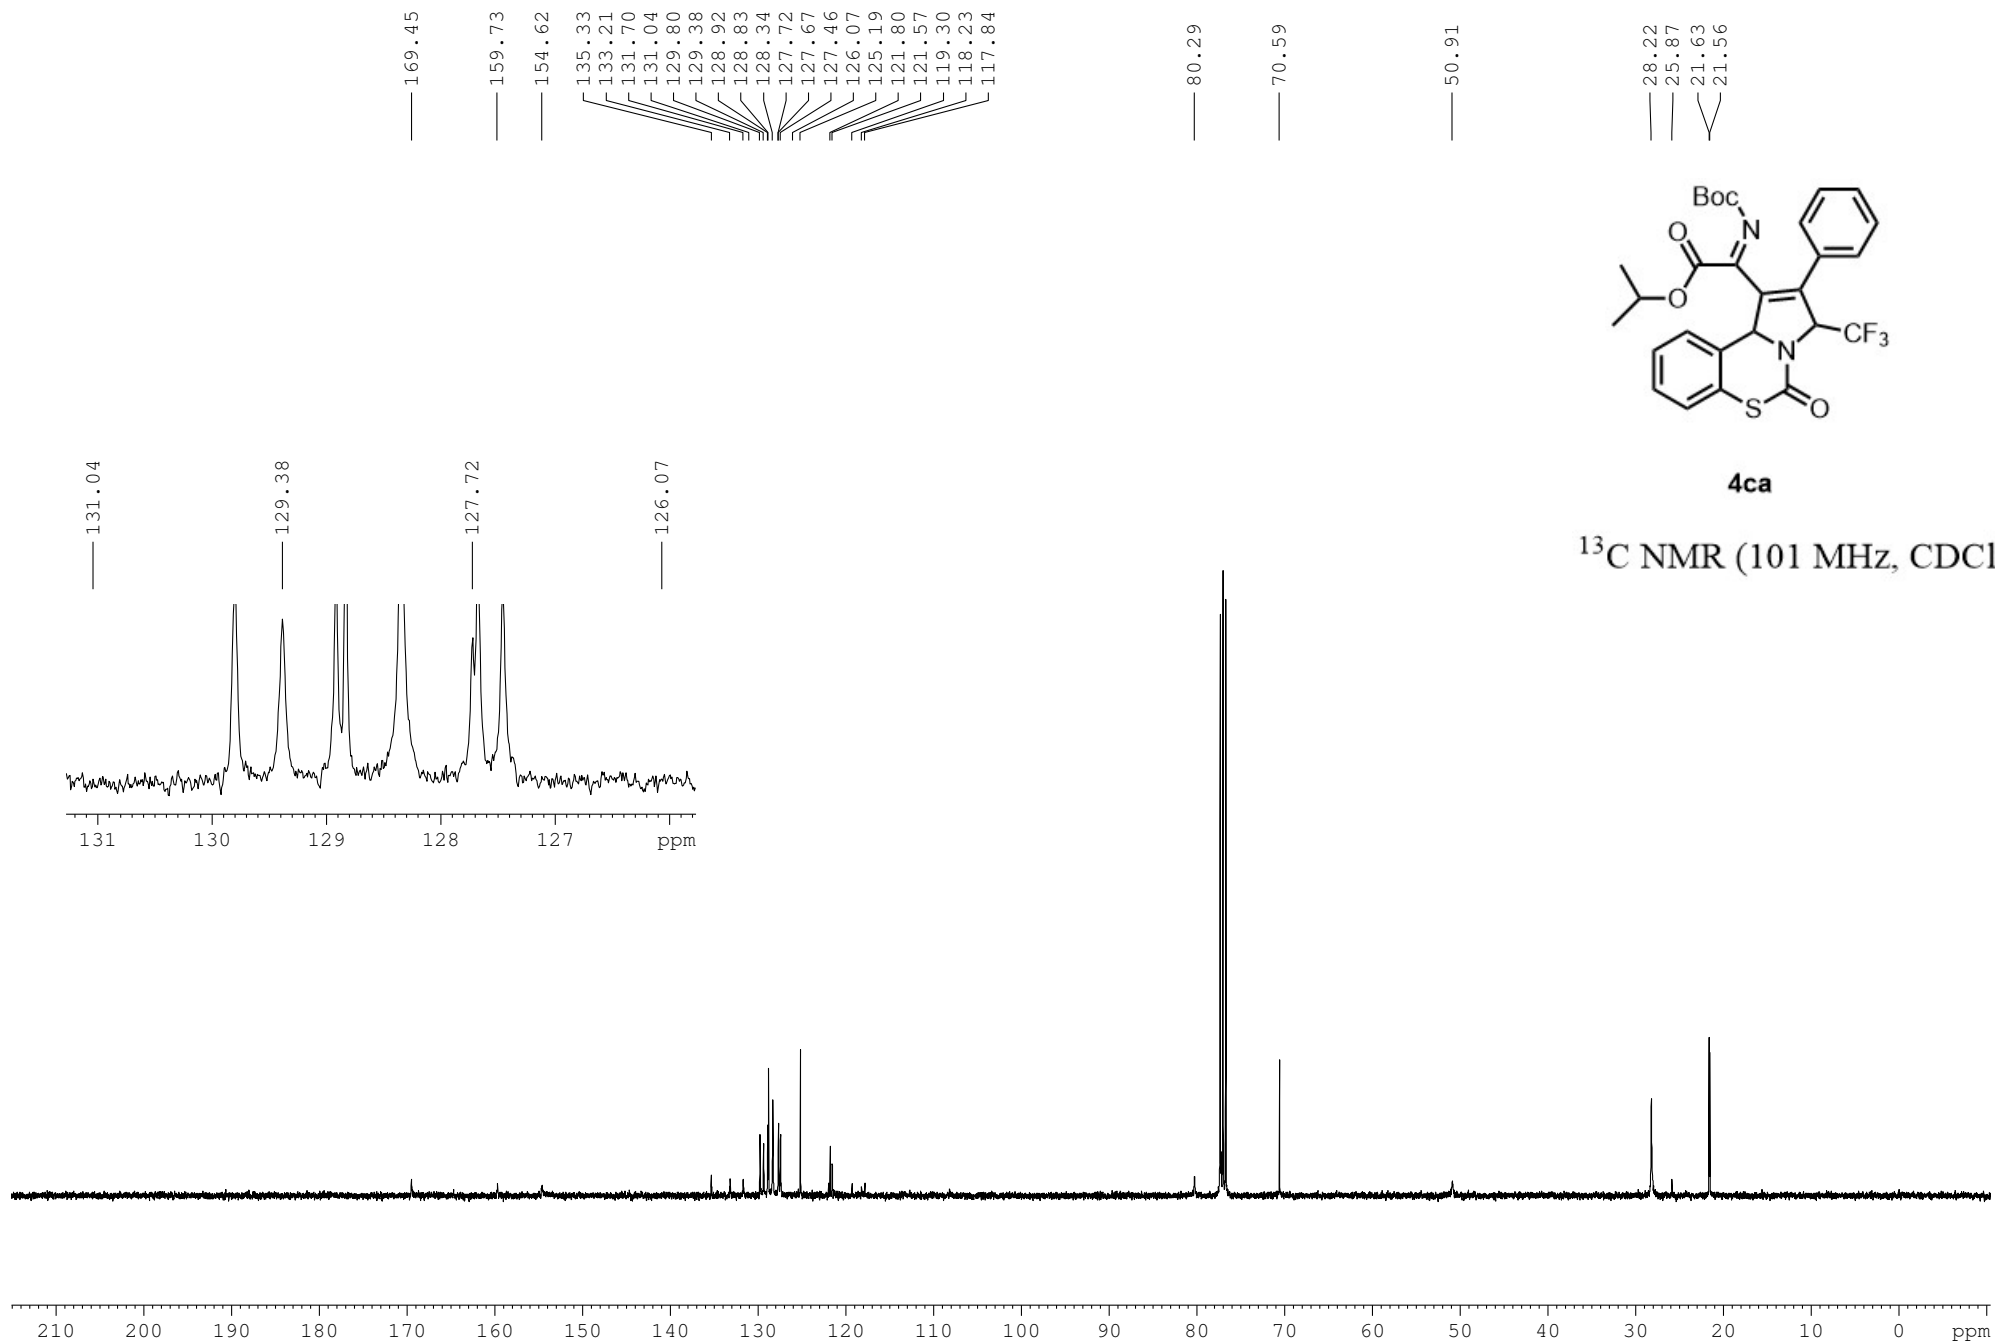

-52.07

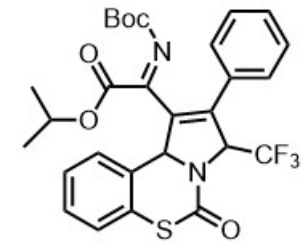

**4ca**

<sup>19</sup>F NMR (376 MHz, CDCl<sub>3</sub>)

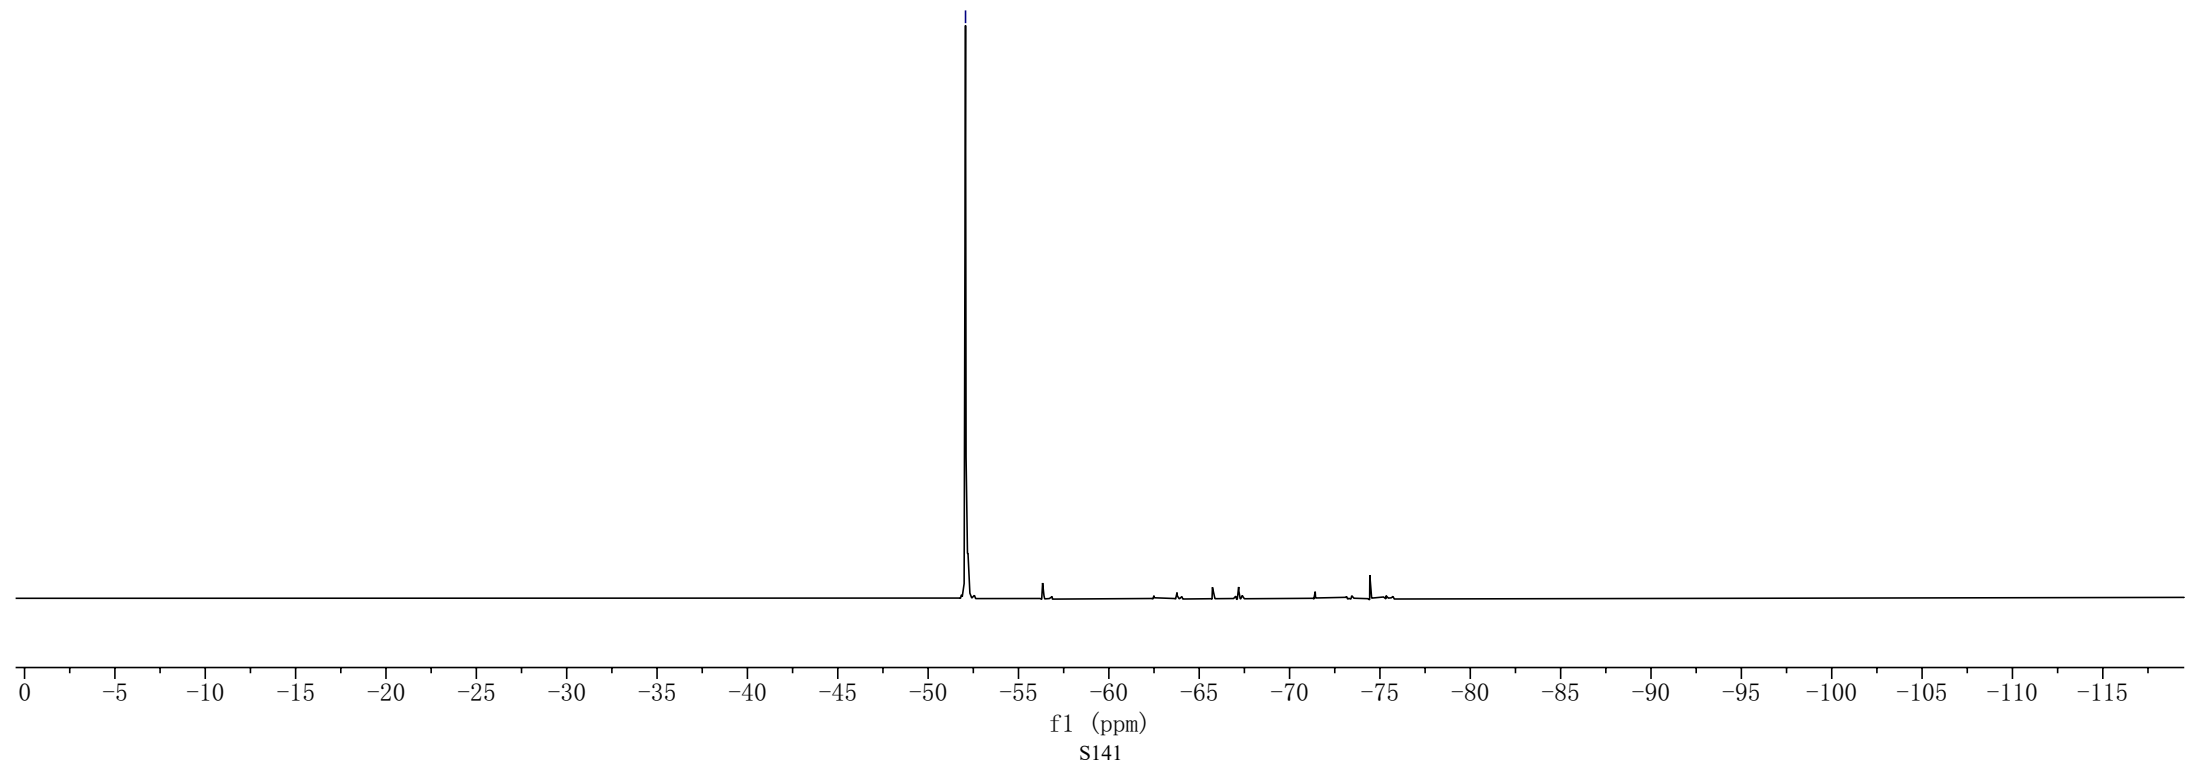

8.06  
8.05  
8.04  
8.03  
7.48  
7.47  
7.46  
7.45  
7.44  
7.43  
7.17  
7.15  
7.13  
7.12

5.84  
5.82  
5.42  
5.41  
5.40  
5.39

3.41

1.47

-0.00

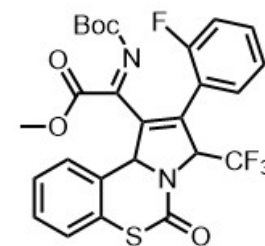

**4ea**

<sup>1</sup>H NMR (400 MHz, CDCl<sub>3</sub>)

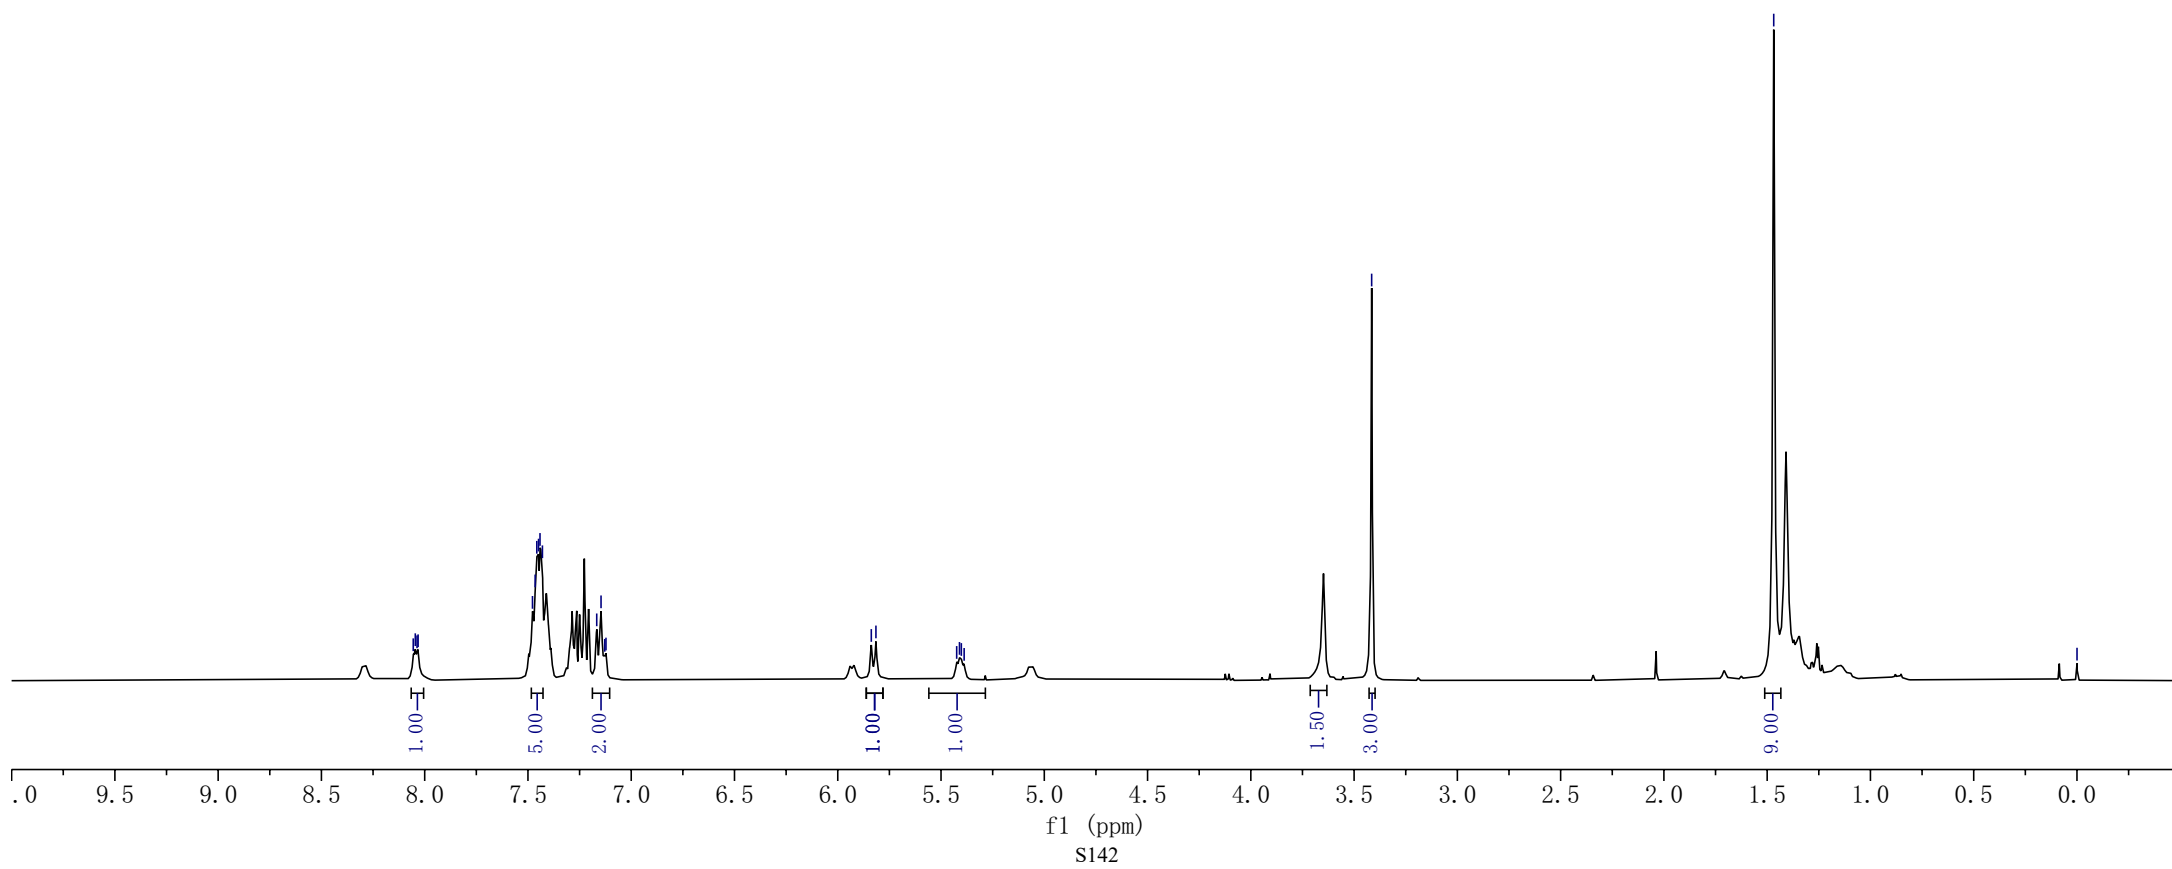

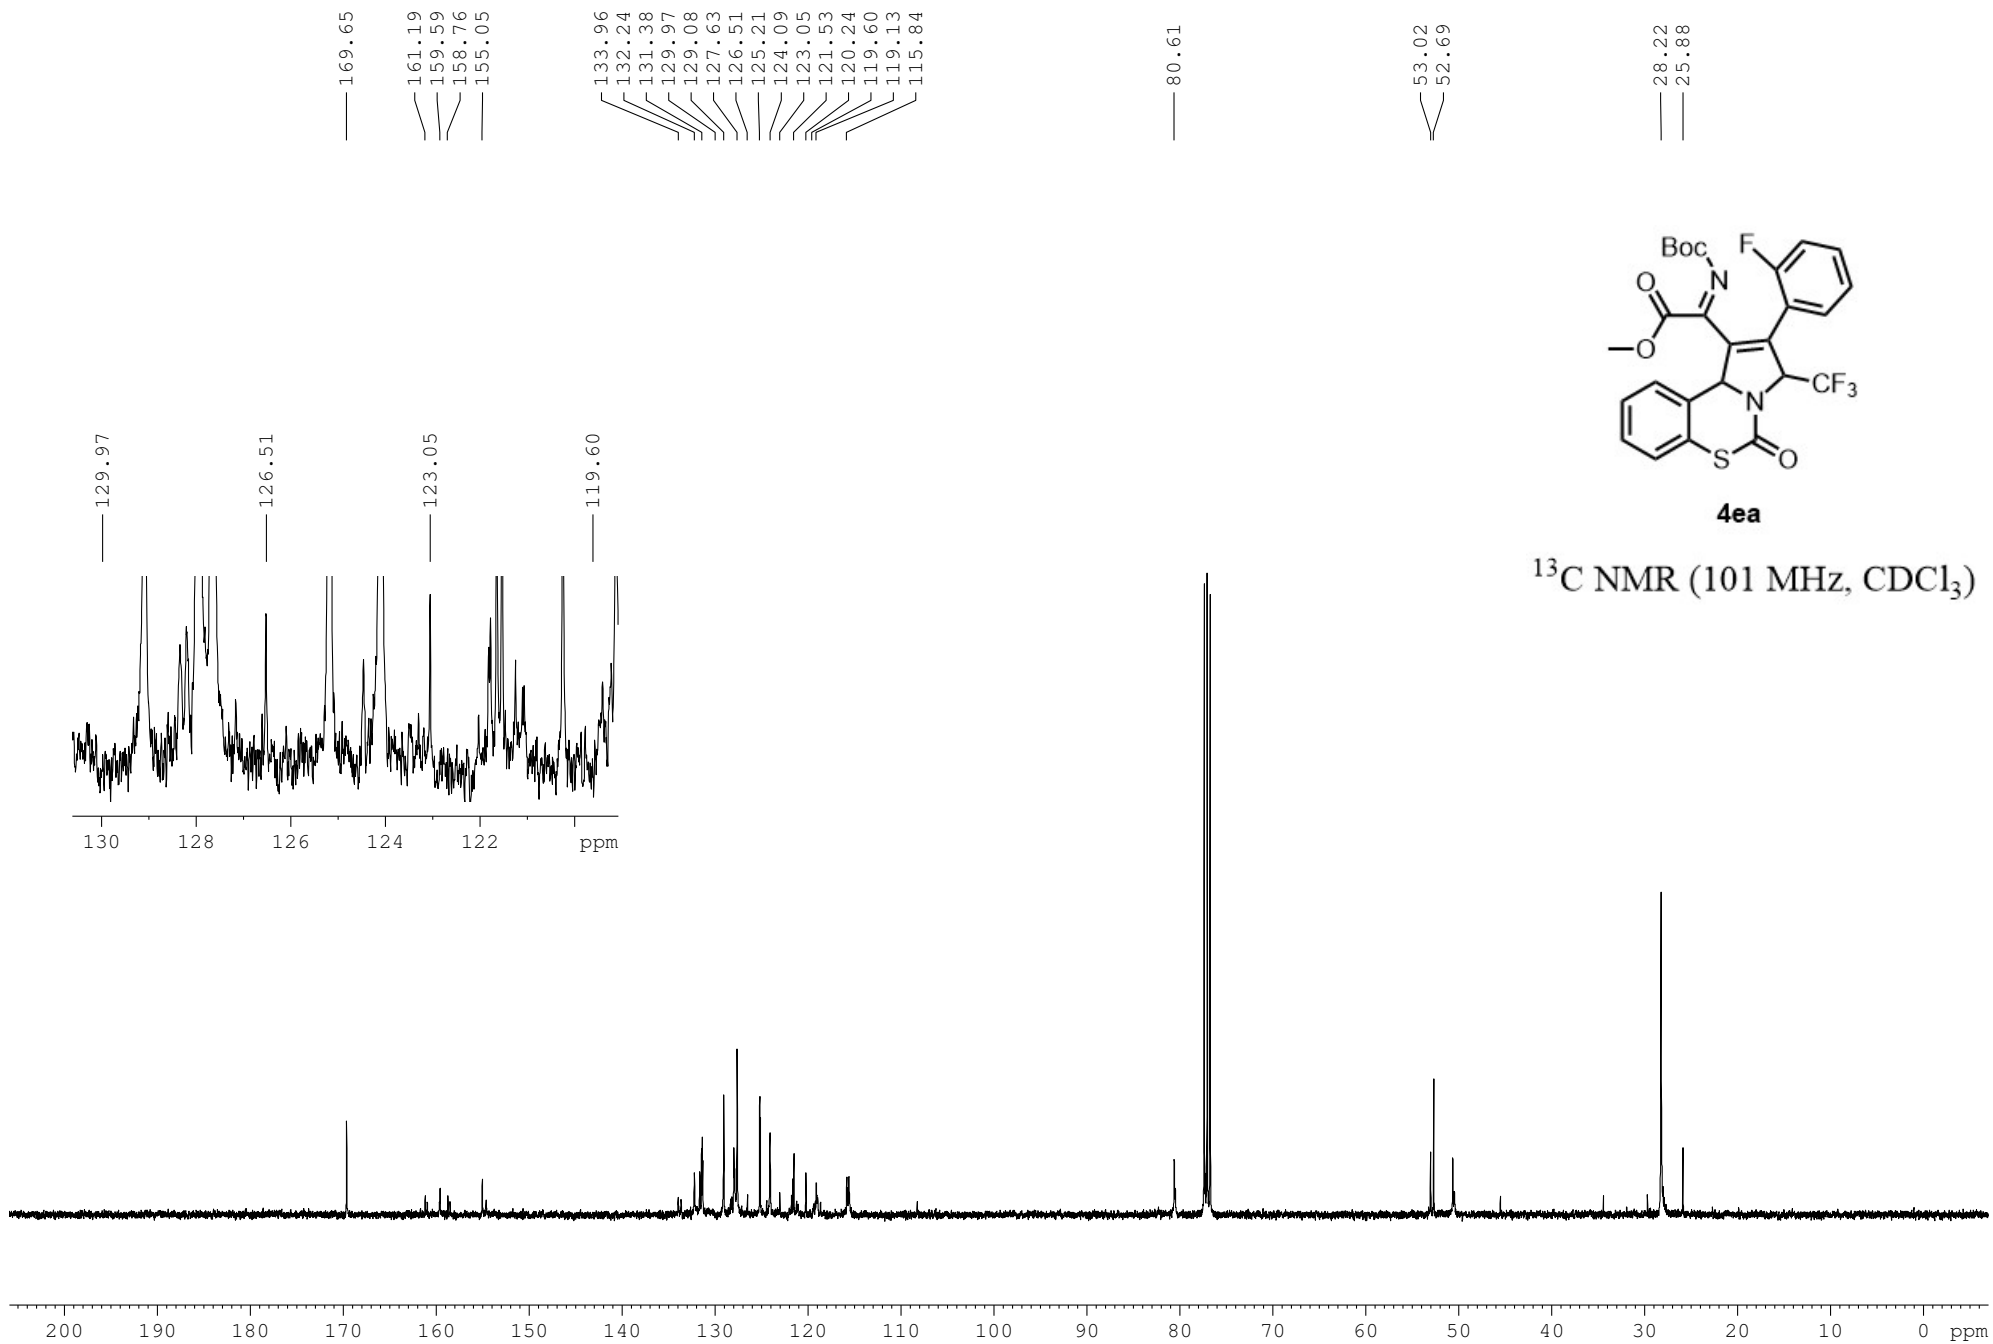

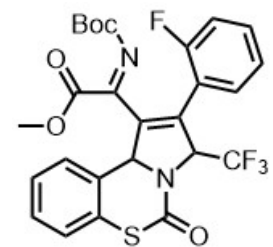

**4ea**

<sup>19</sup>F NMR (376 MHz, CDCl<sub>3</sub>)

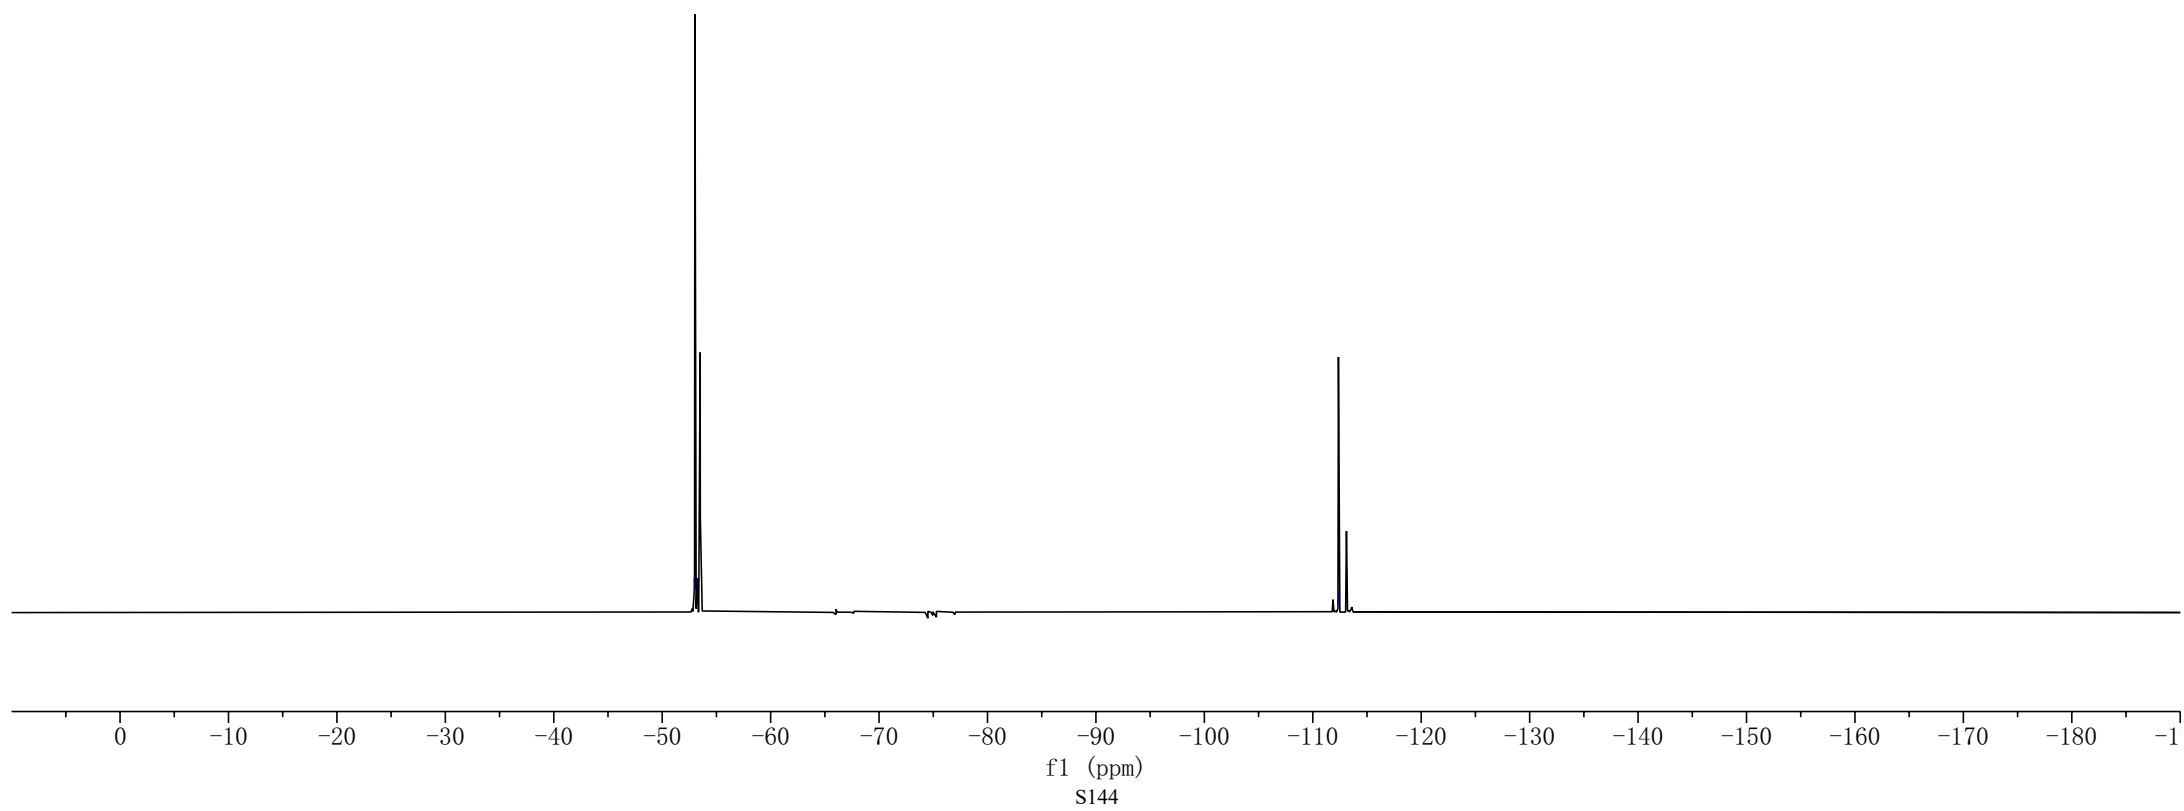



8.03  
7.40  
7.39  
7.38  
7.37  
7.36  
7.35  
7.34  
7.33  
7.32  
7.21  
7.19  
7.03  
7.01

5.79  
5.77

4.96  
4.94

3.54

1.33

-0.00

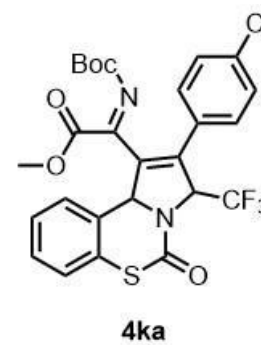

<sup>1</sup>H NMR (400 MHz, CDCl<sub>3</sub>)

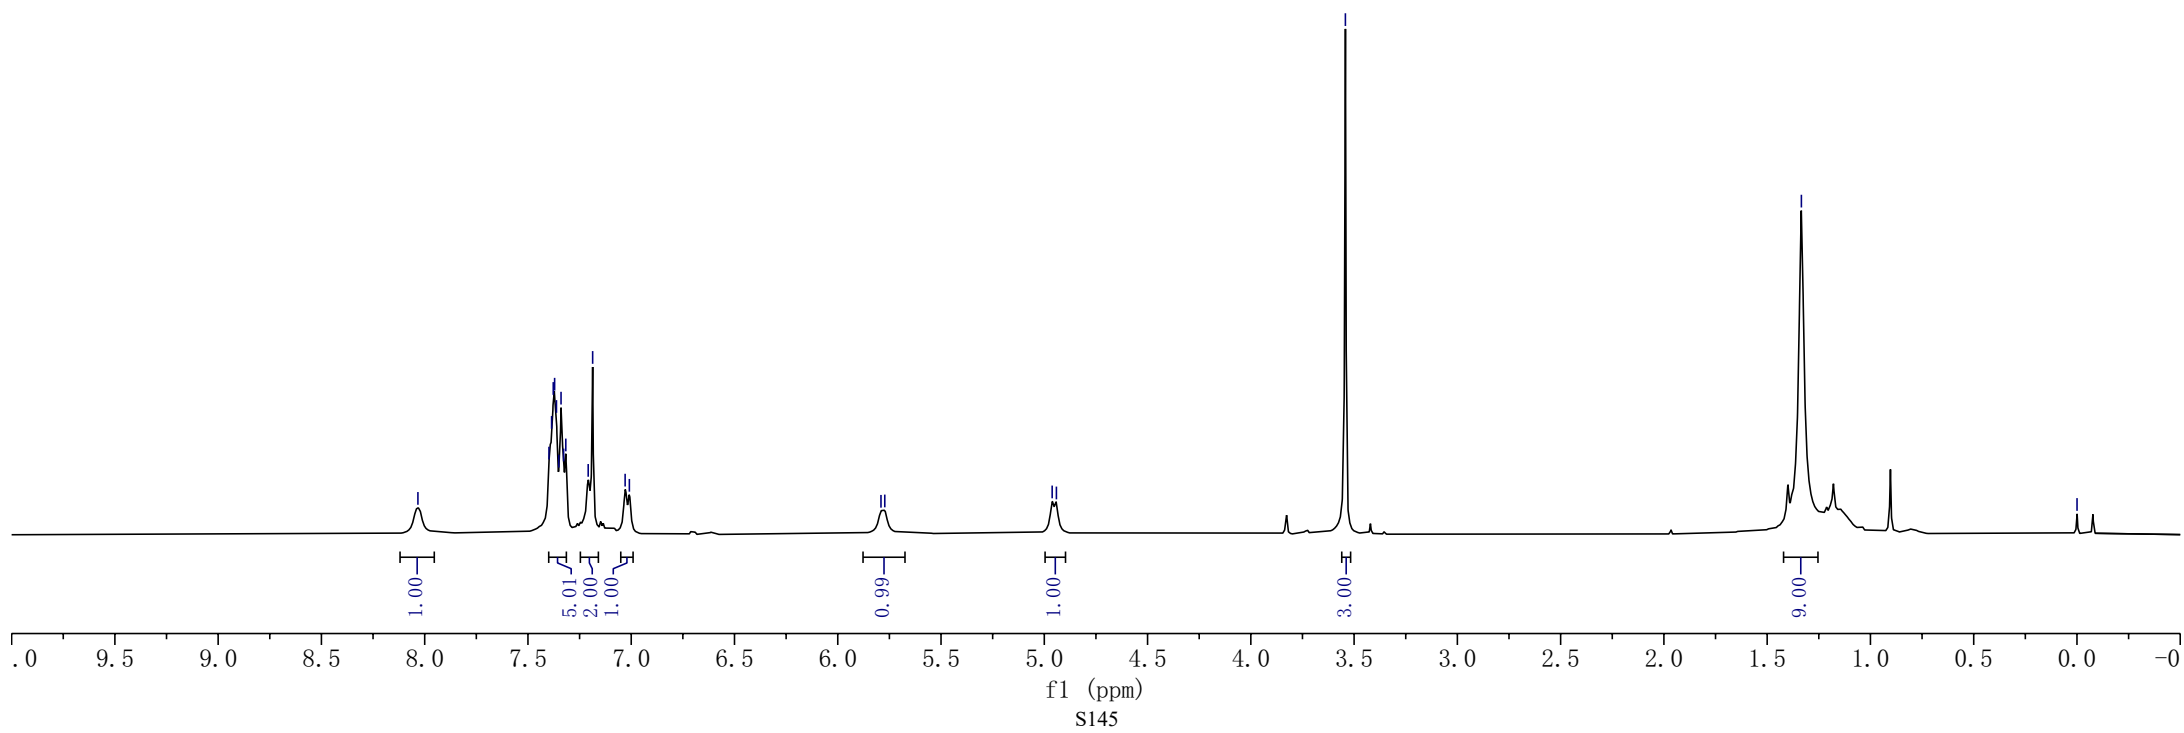

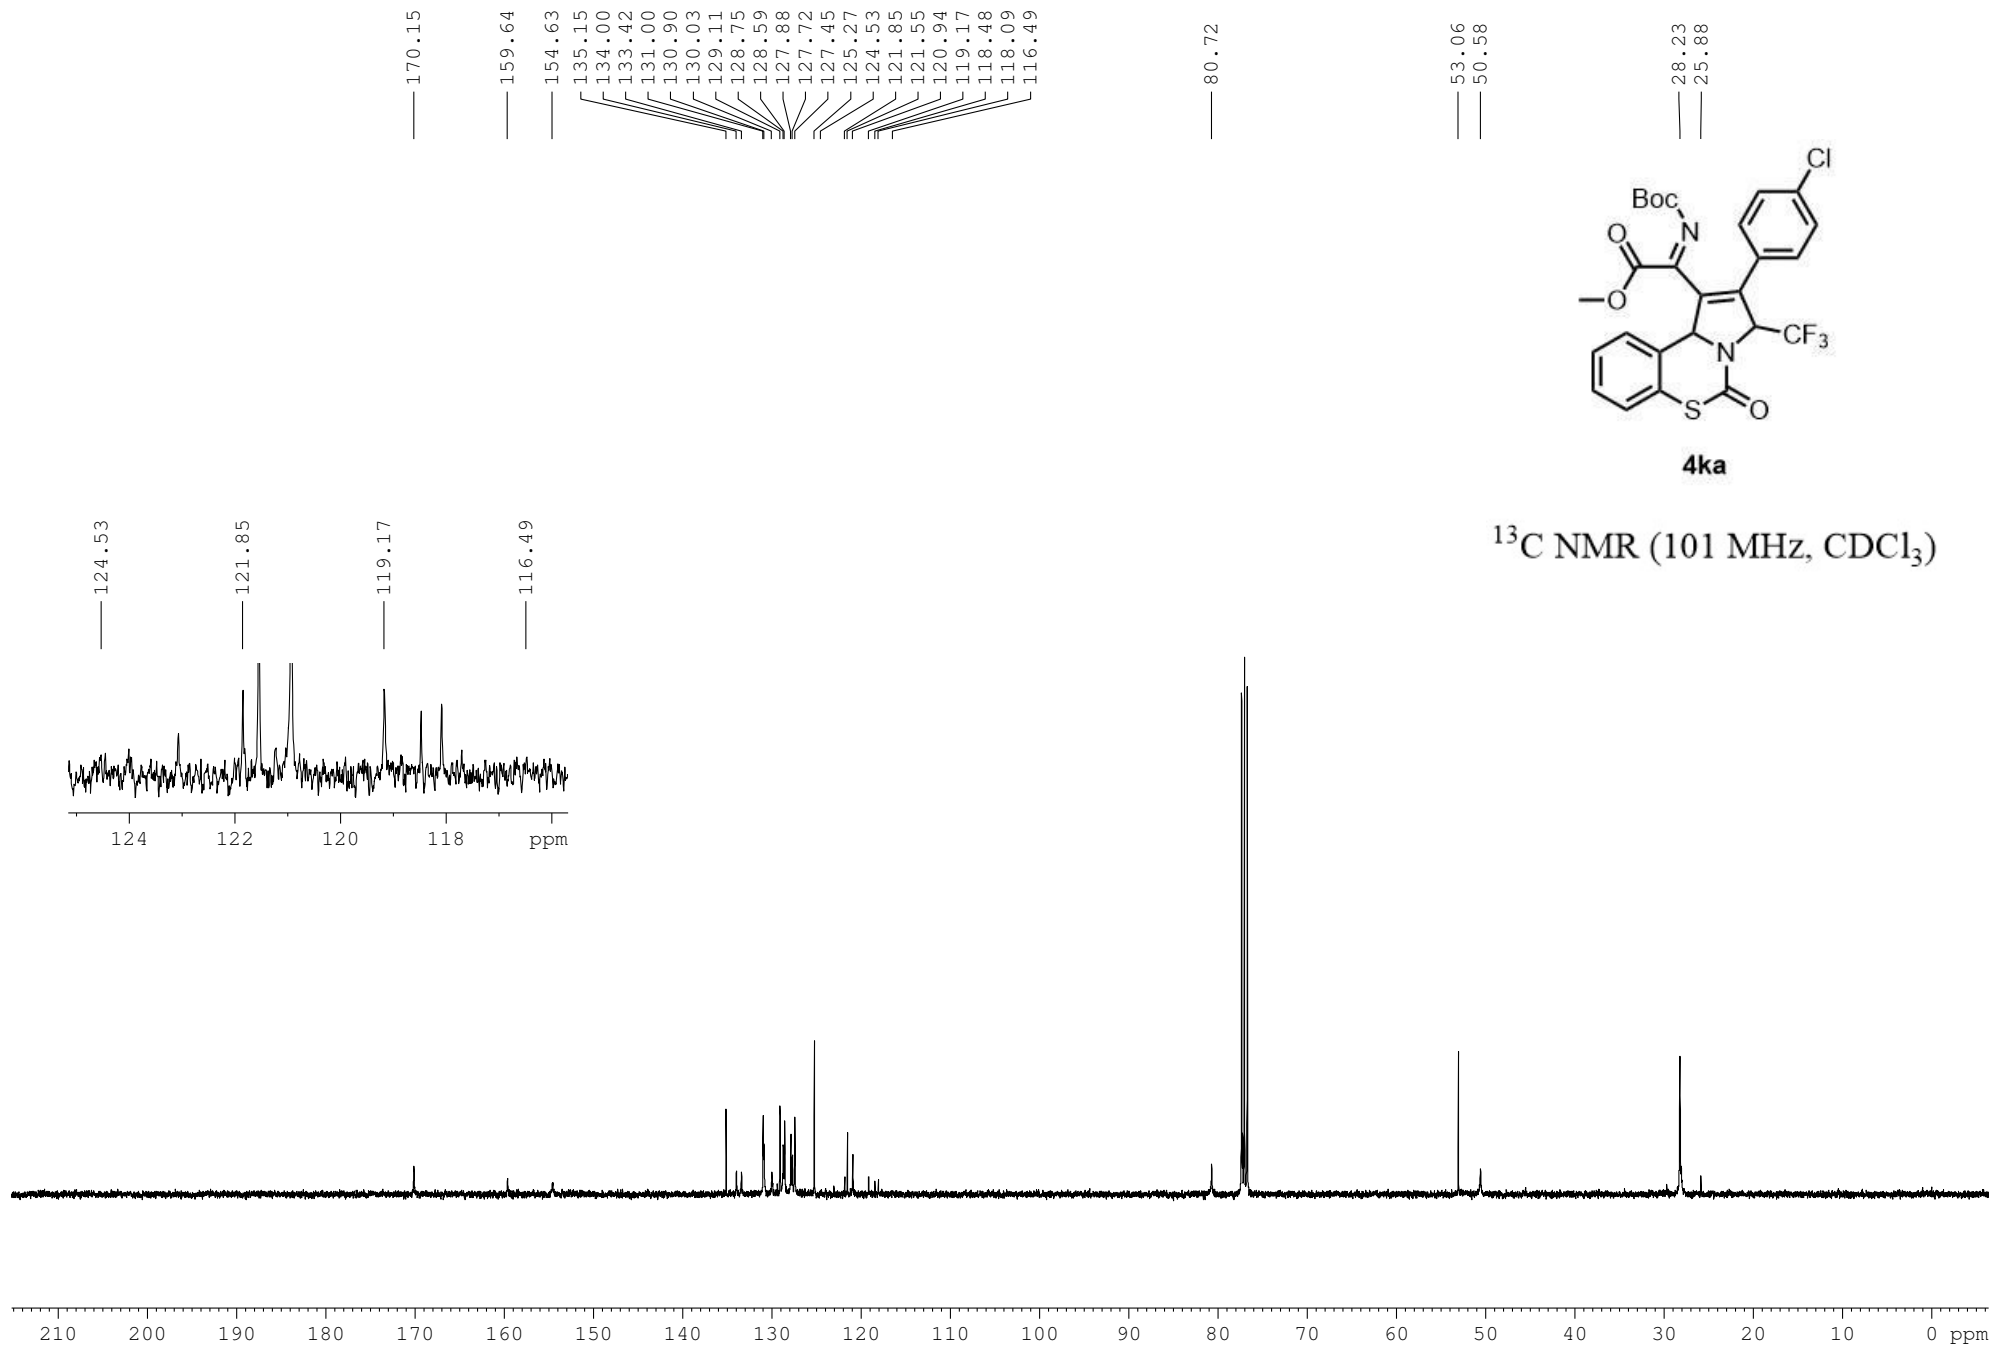

-52.04

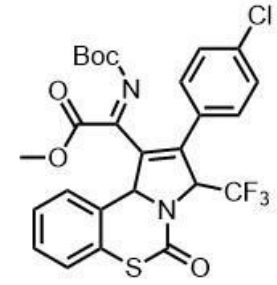

**4ka**

$^{19}\text{F}$  NMR (376 MHz,  $\text{CDCl}_3$ )

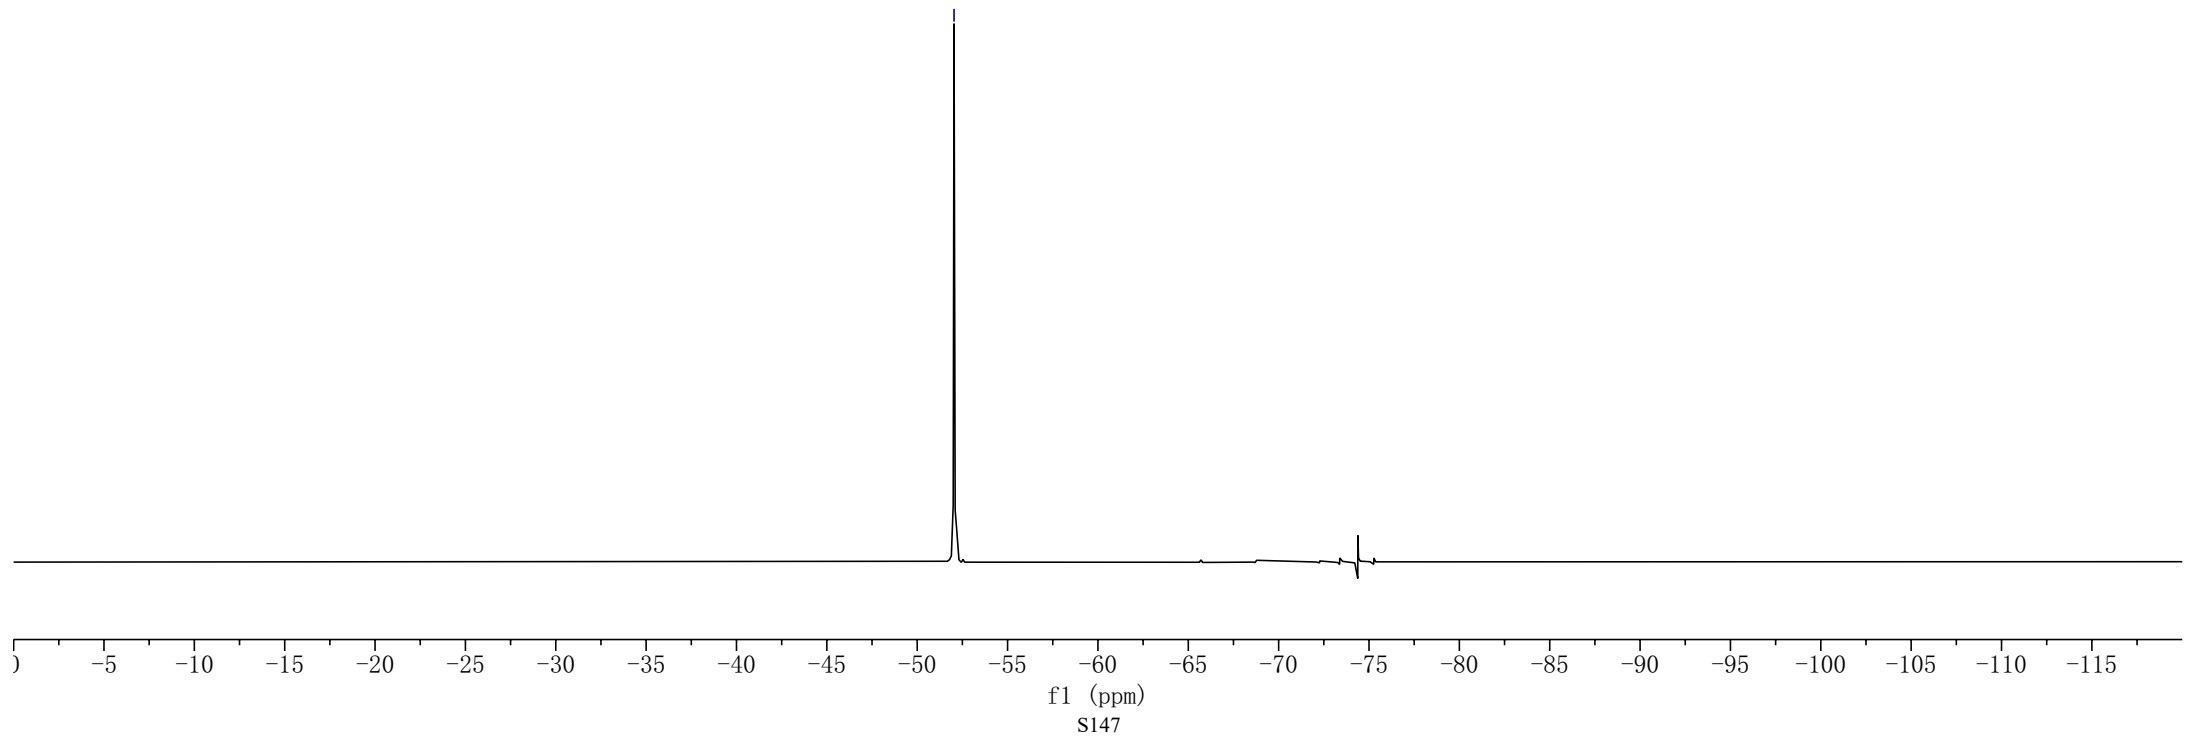

8.07  
8.05  
7.38  
7.37  
7.36  
7.35  
7.33  
7.32  
7.22  
7.20  
7.18  
7.15  
7.14  
7.13  
7.12  
6.94  
6.92

5.85  
5.83

4.94  
4.92

3.52

2.35

1.34

-0.00

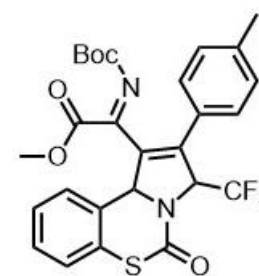

**4ma**

<sup>1</sup>H NMR (400 MHz, CDCl<sub>3</sub>)

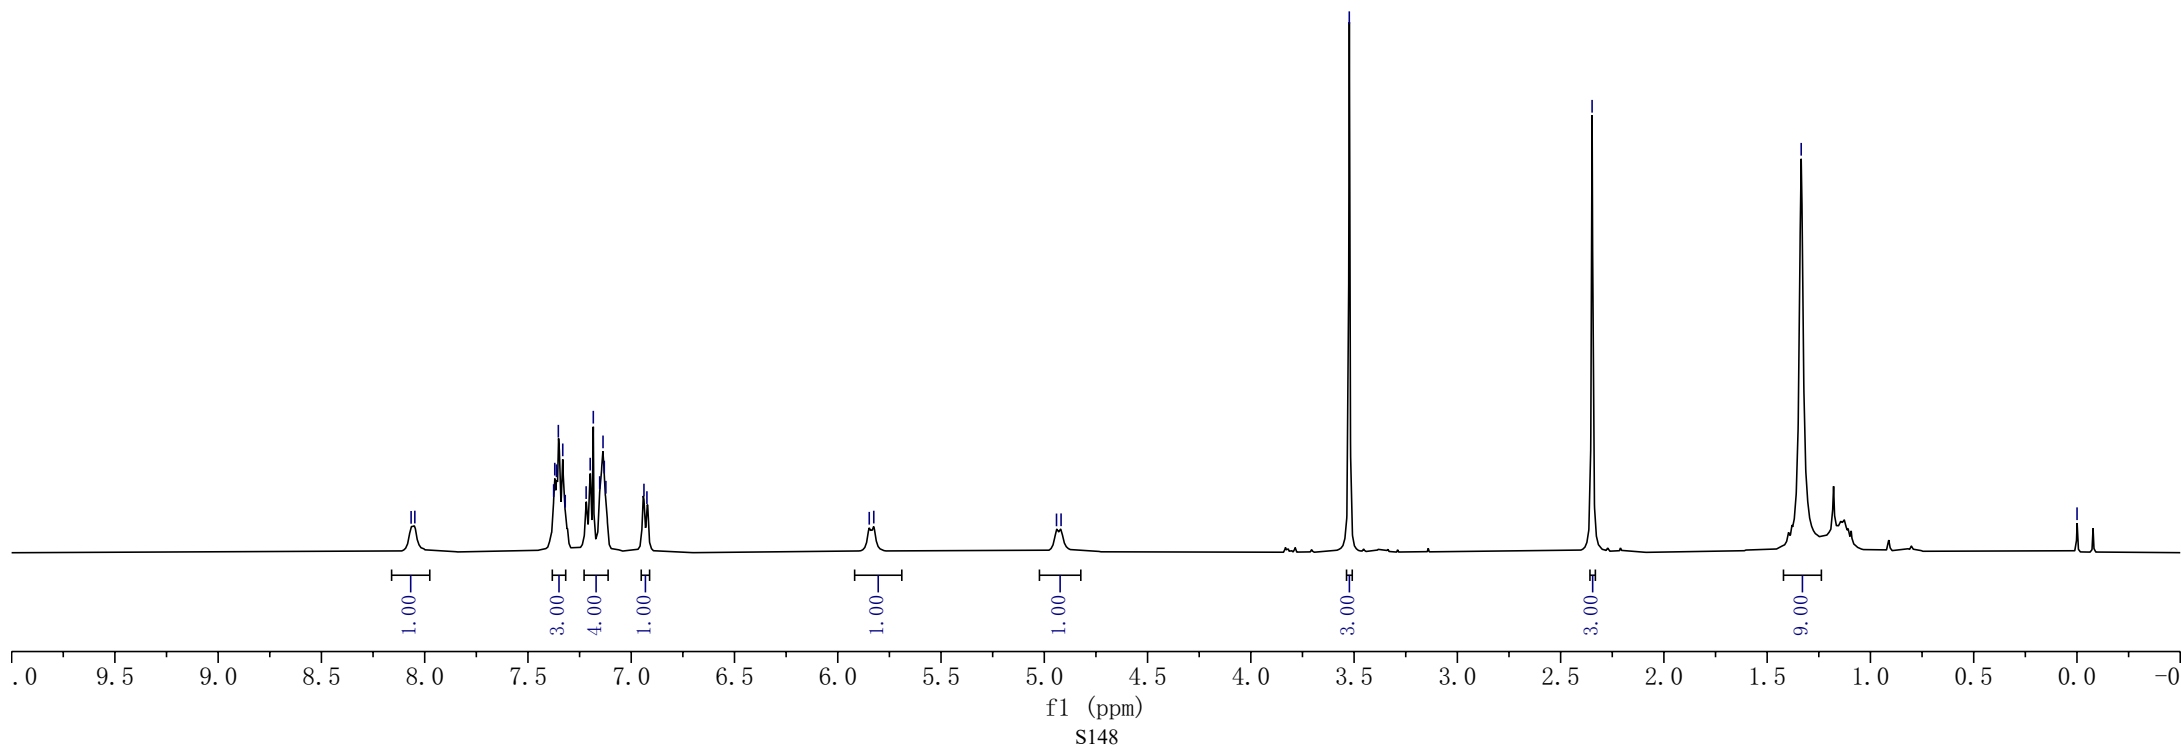

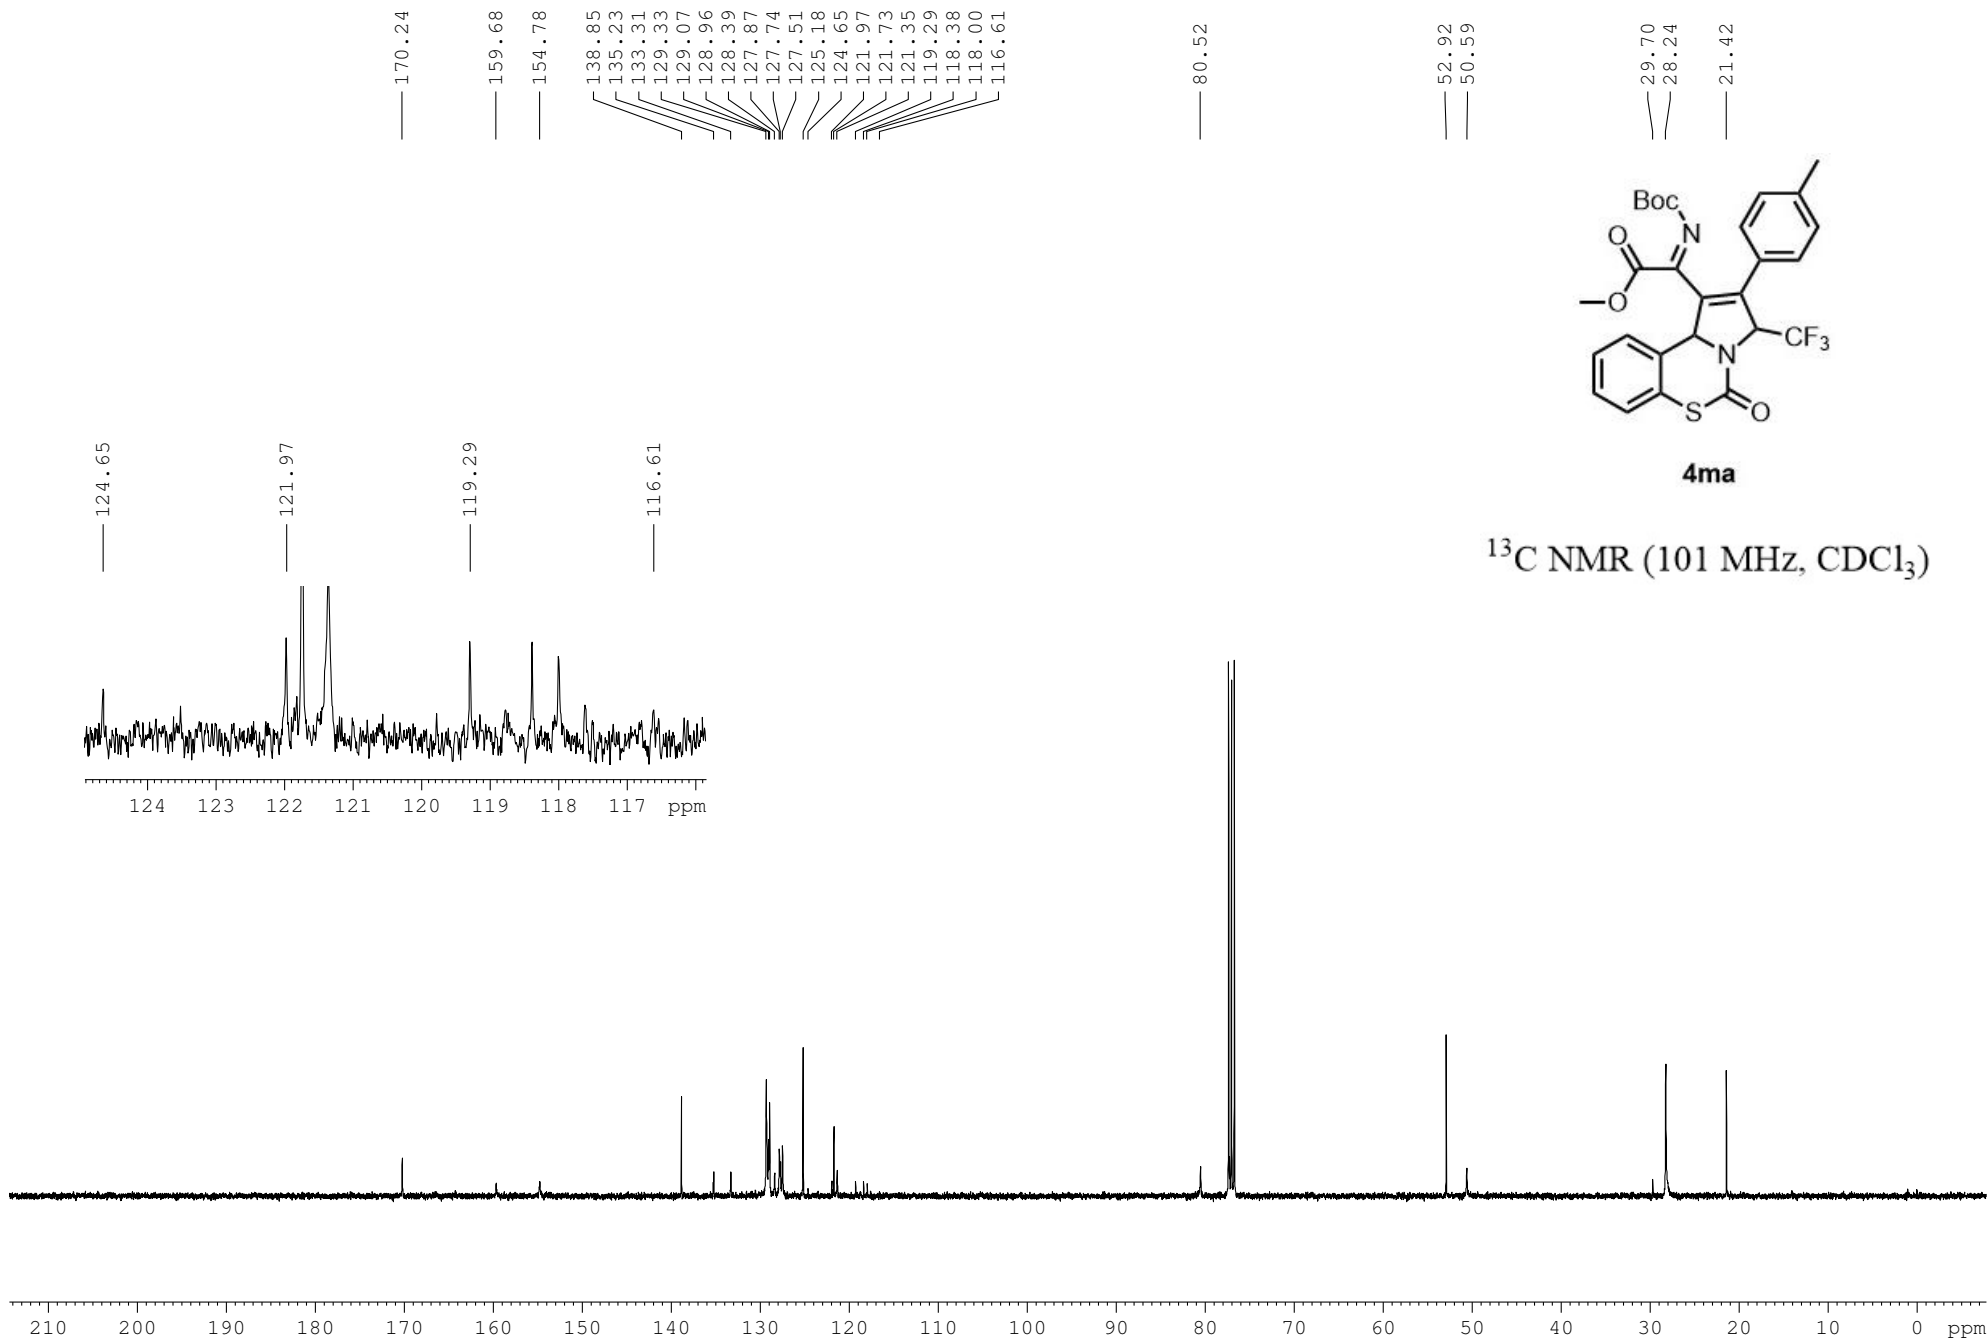

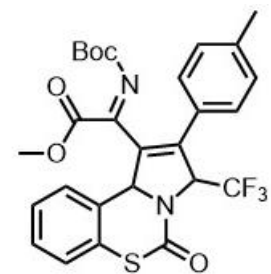

**4ma**

$^{19}\text{F}$  NMR (376 MHz,  $\text{CDCl}_3$ )

—52.21

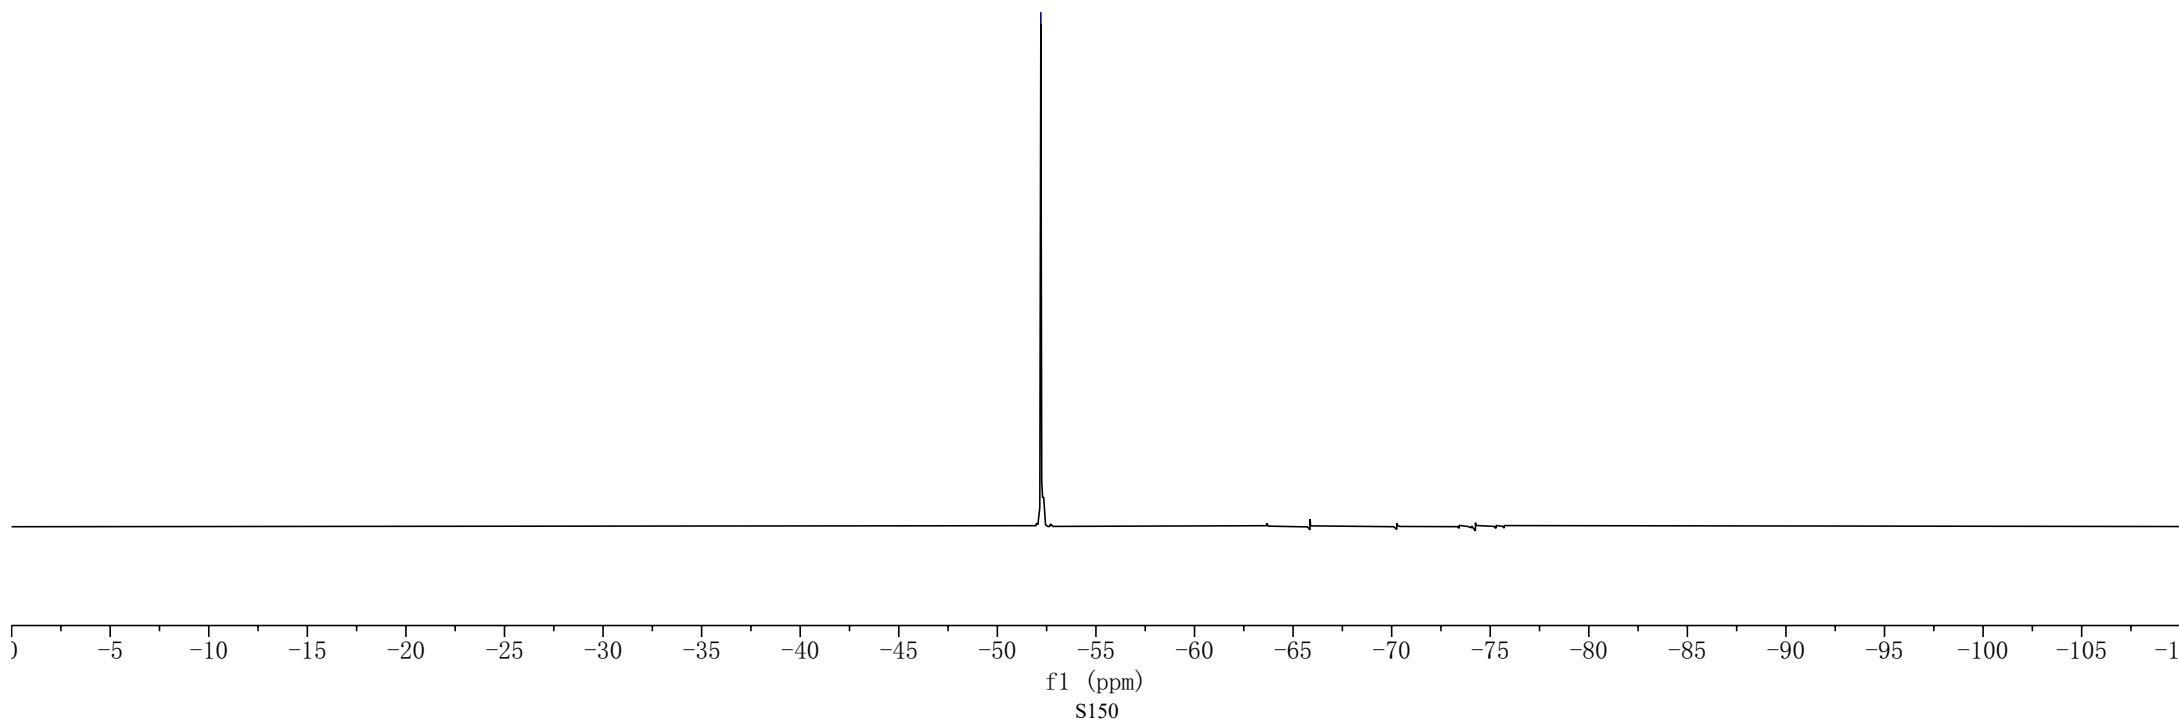

8.05  
8.04  
7.37  
7.36  
7.35  
7.33  
7.30  
7.18  
7.16  
6.98  
6.96  
6.94  
6.93  
6.92  
6.91  
6.87  
6.85  
6.84

5.85  
5.82

4.96  
4.93

3.79  
3.53

1.34

-0.00

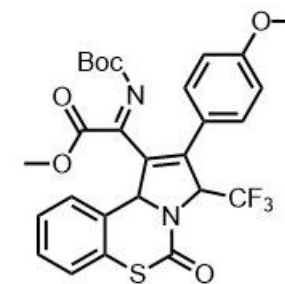

**4oa**

<sup>1</sup>H NMR (400 MHz, CDCl<sub>3</sub>)

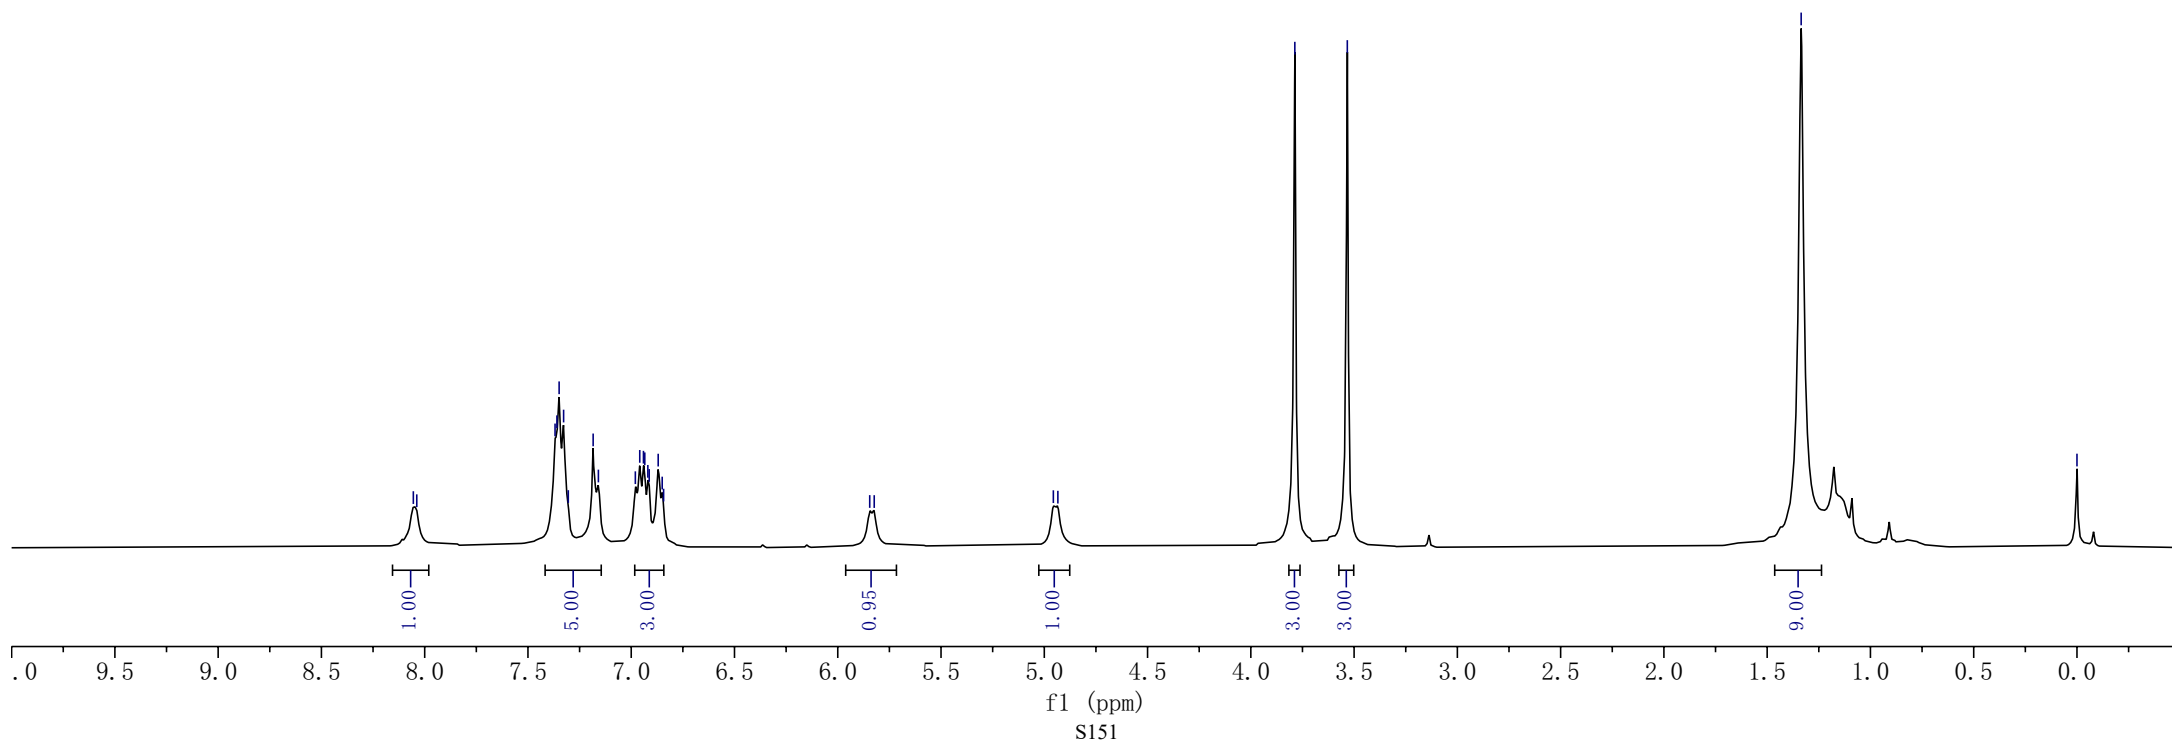

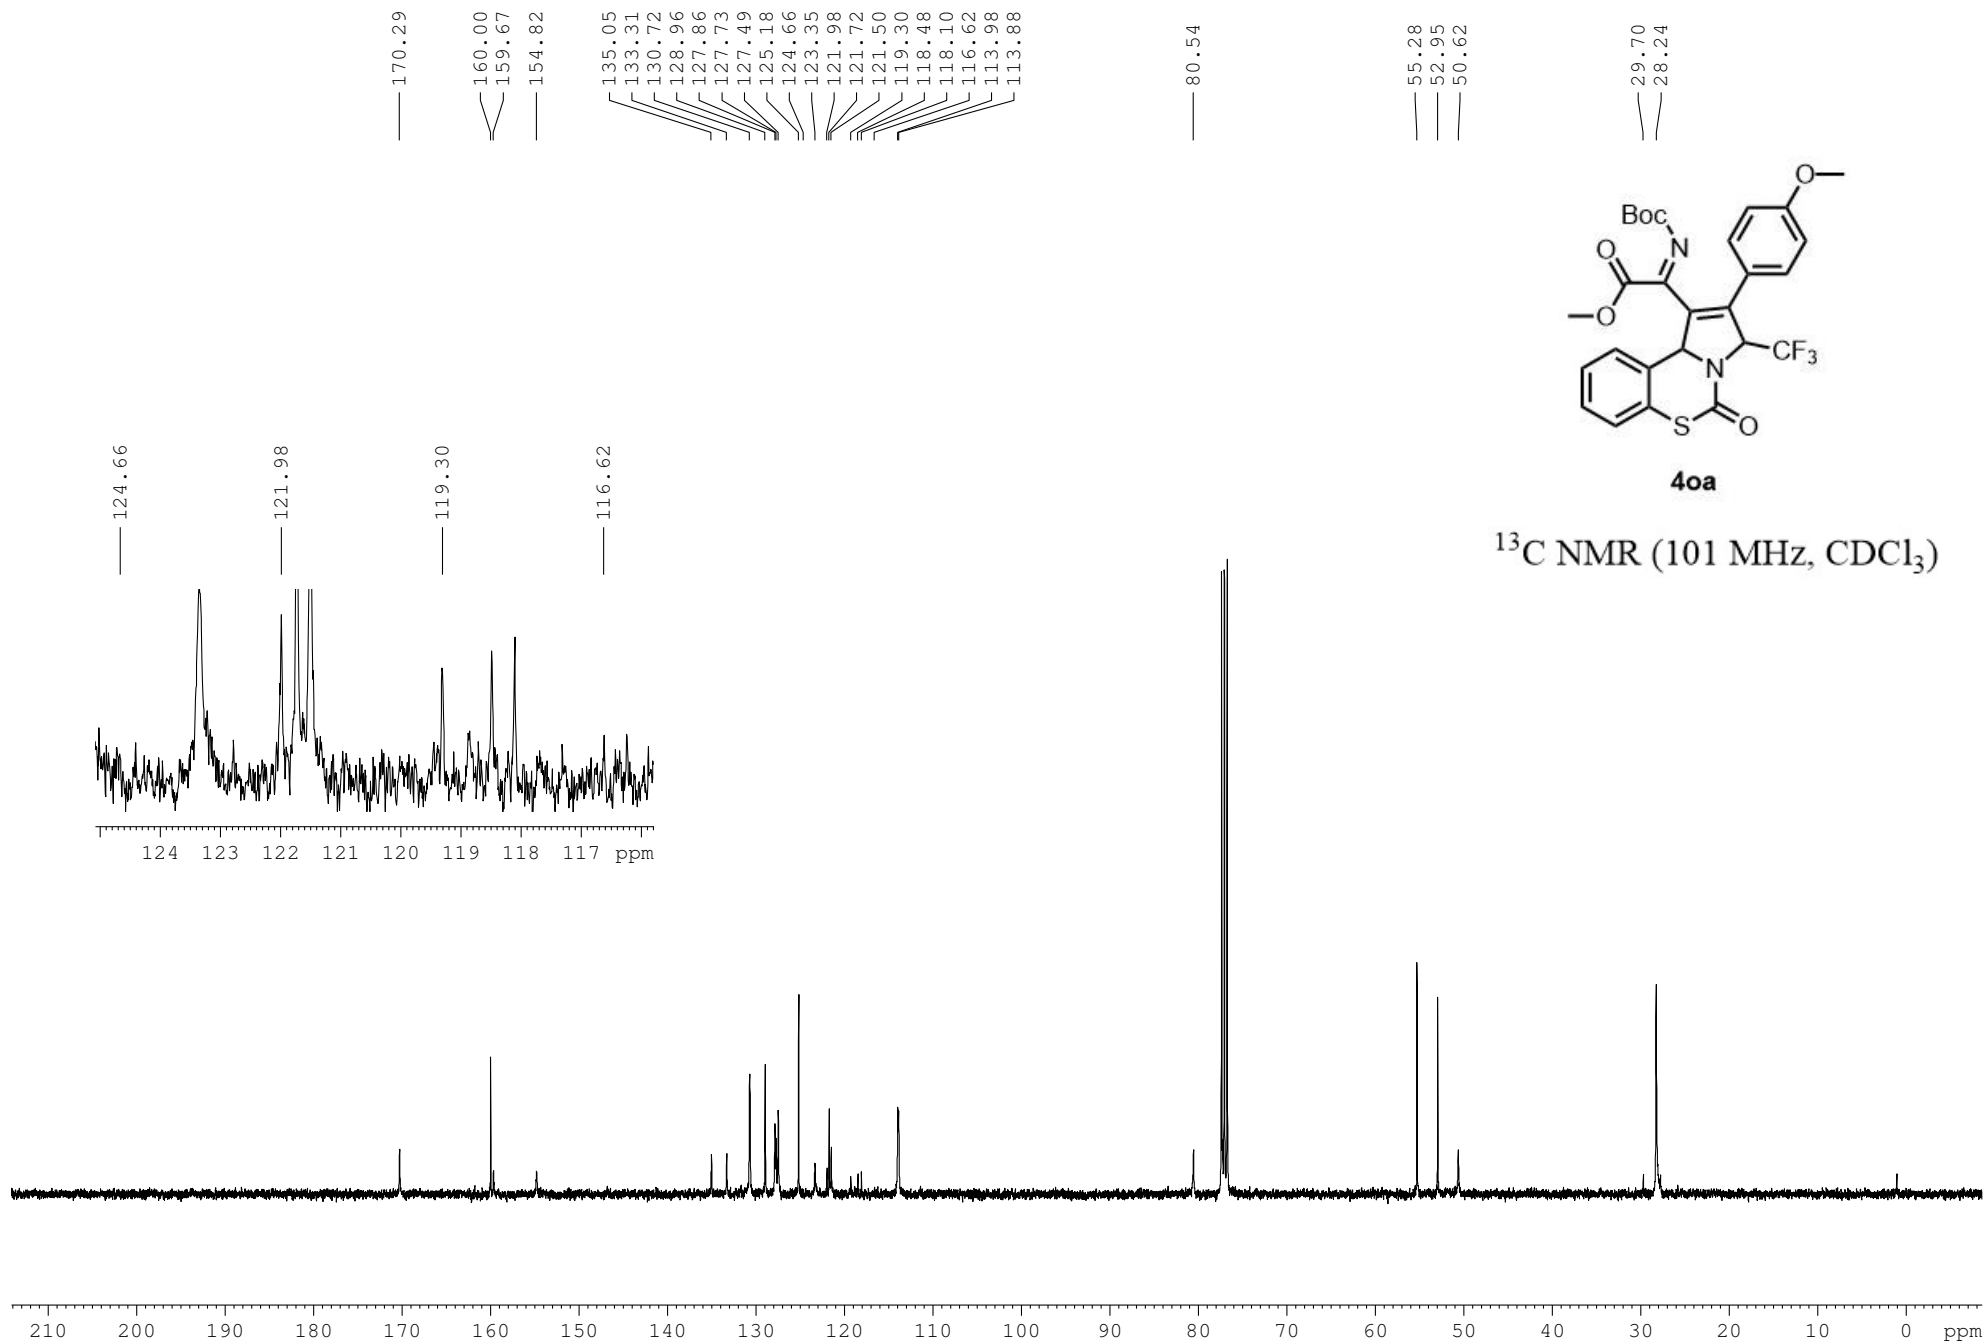





8.03  
8.01  
7.50  
7.49  
7.48  
7.47  
7.46  
7.45  
7.43  
7.41  
7.34  
7.32  
7.27  
7.26  
7.24  
7.20  
7.15  
7.14  
7.13  
7.12  
5.90  
5.87

4.99  
4.97

3.58

2.41

1.41

-0.00

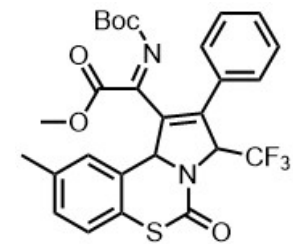

**4ab**

<sup>1</sup>H NMR (400 MHz, CDCl<sub>3</sub>)

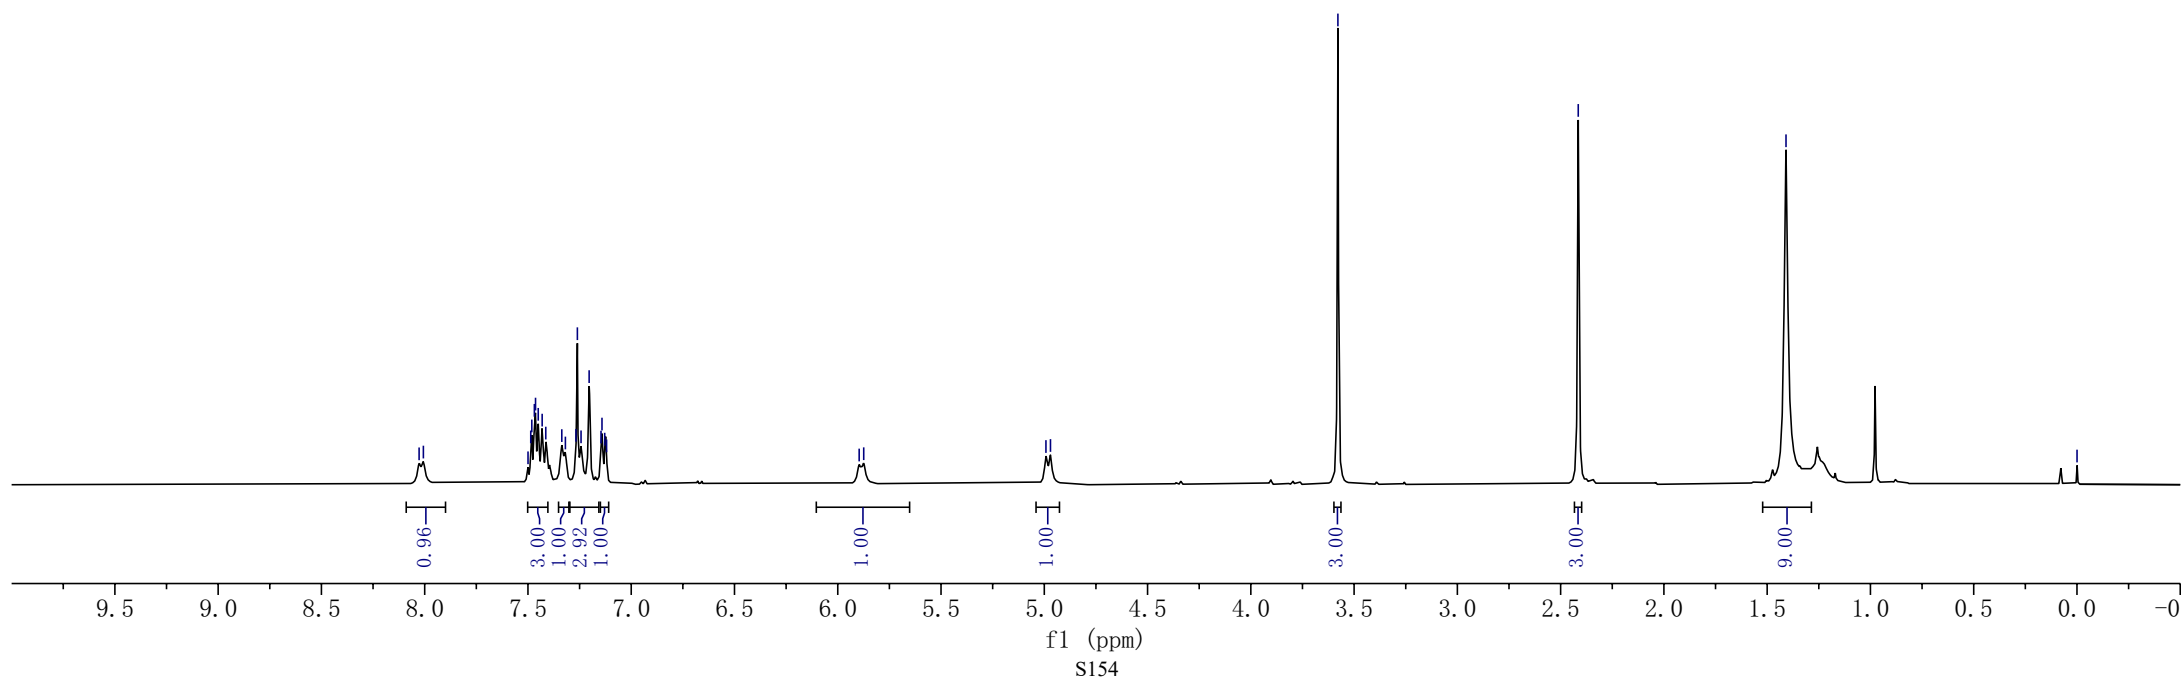

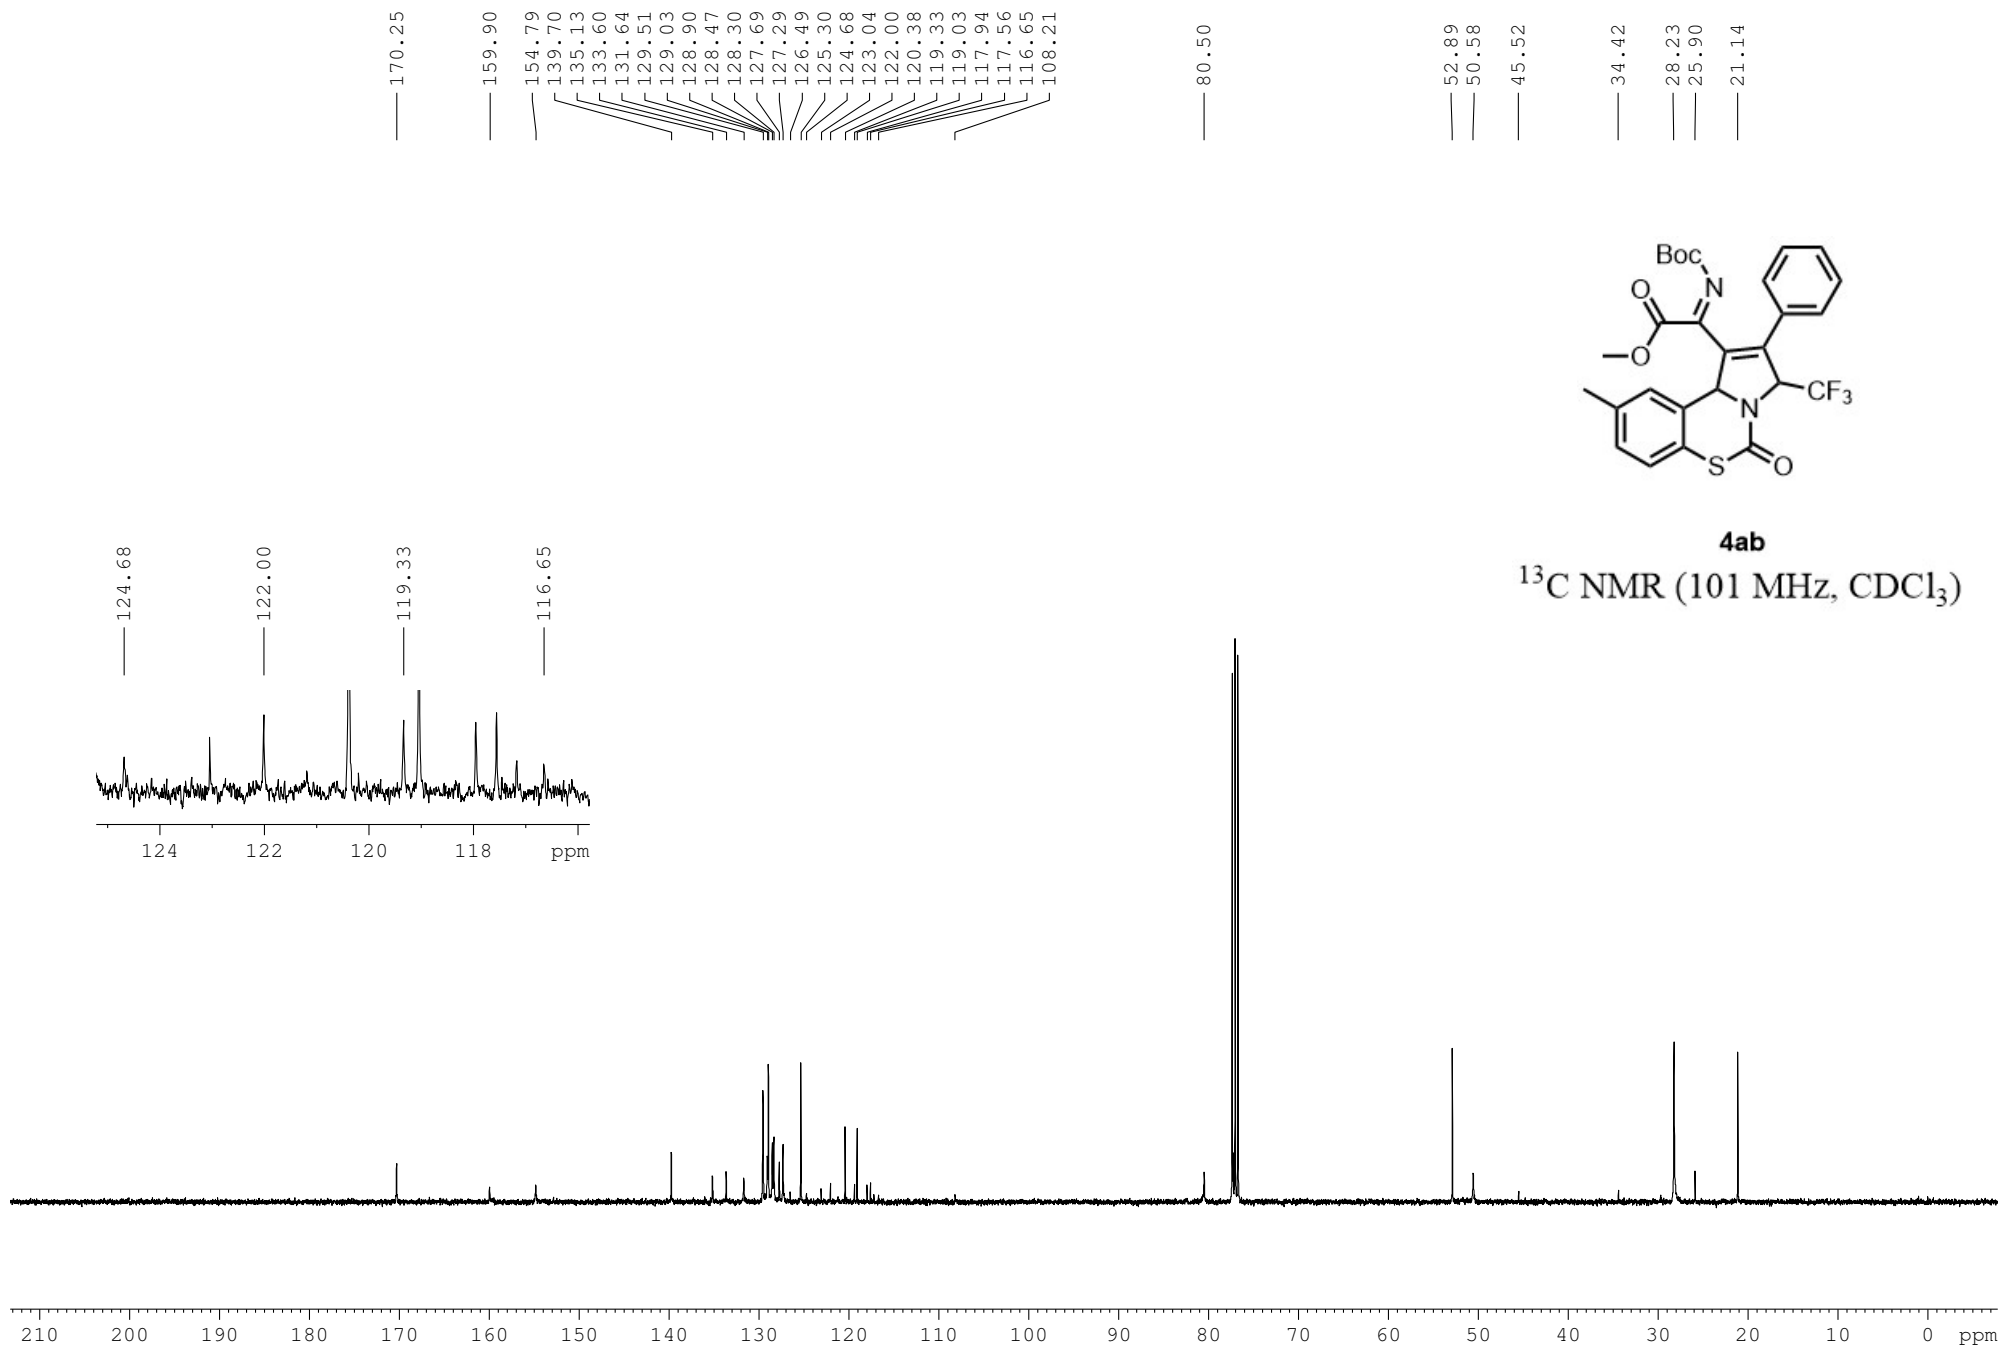

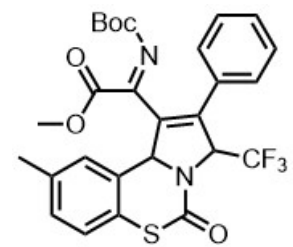

**4ab**

<sup>19</sup>F NMR (376 MHz, CDCl<sub>3</sub>)

-52.08

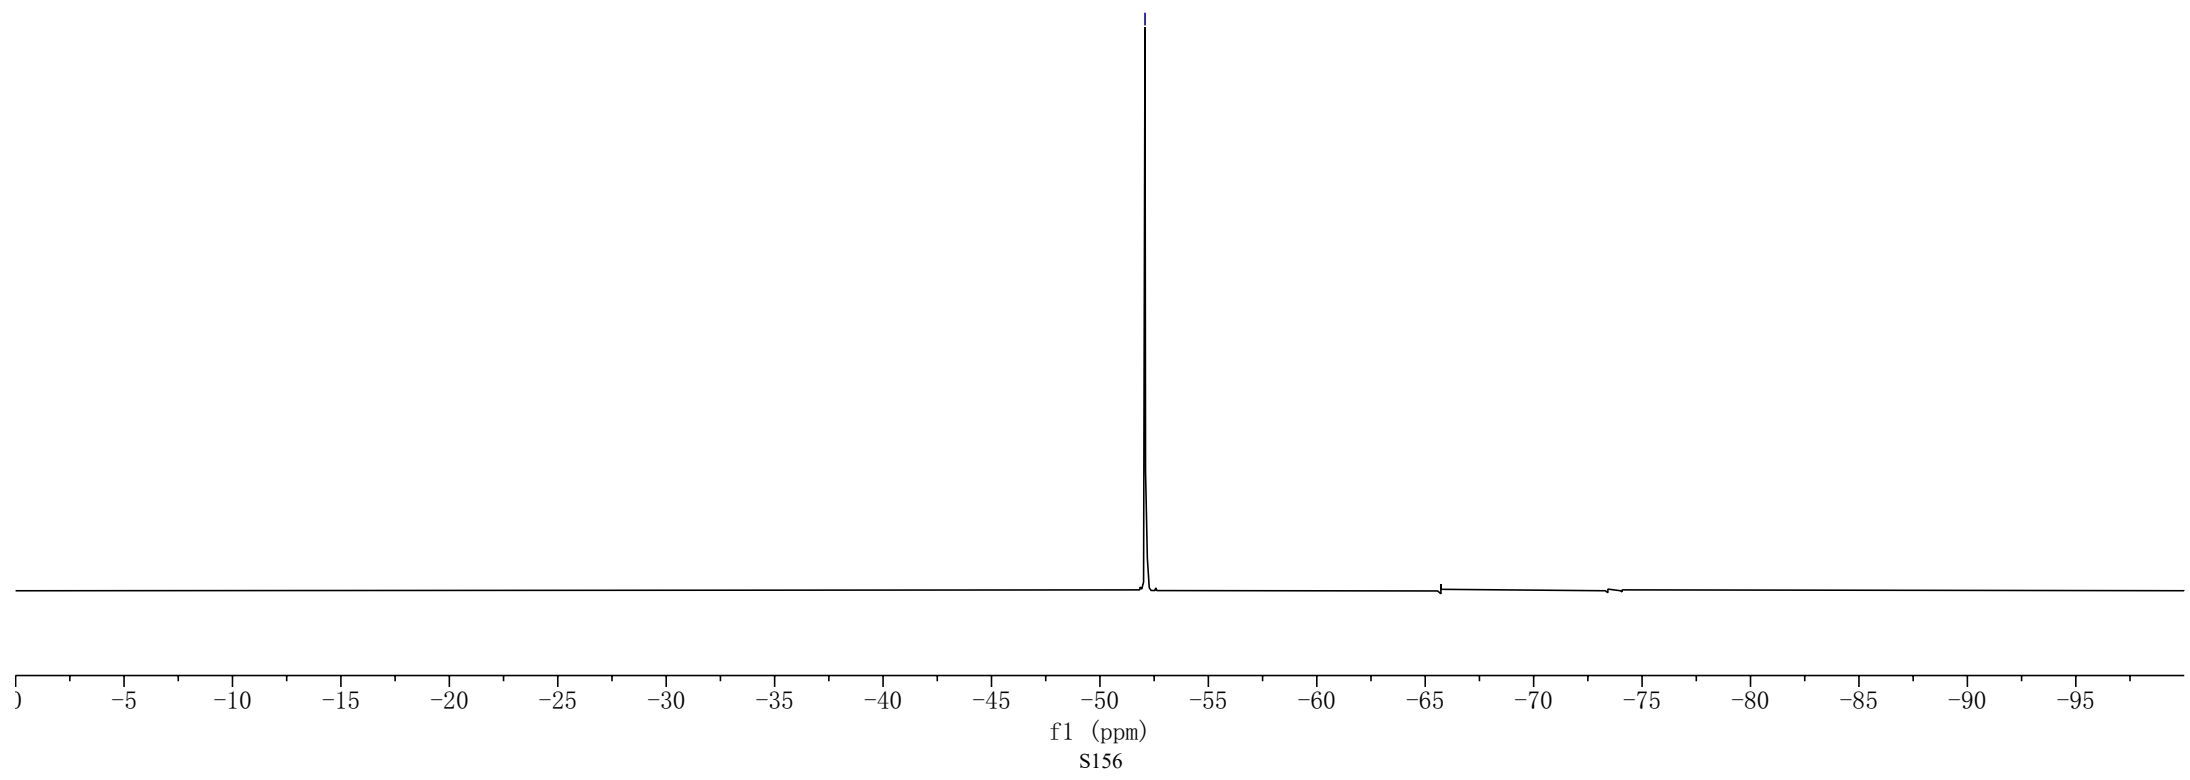

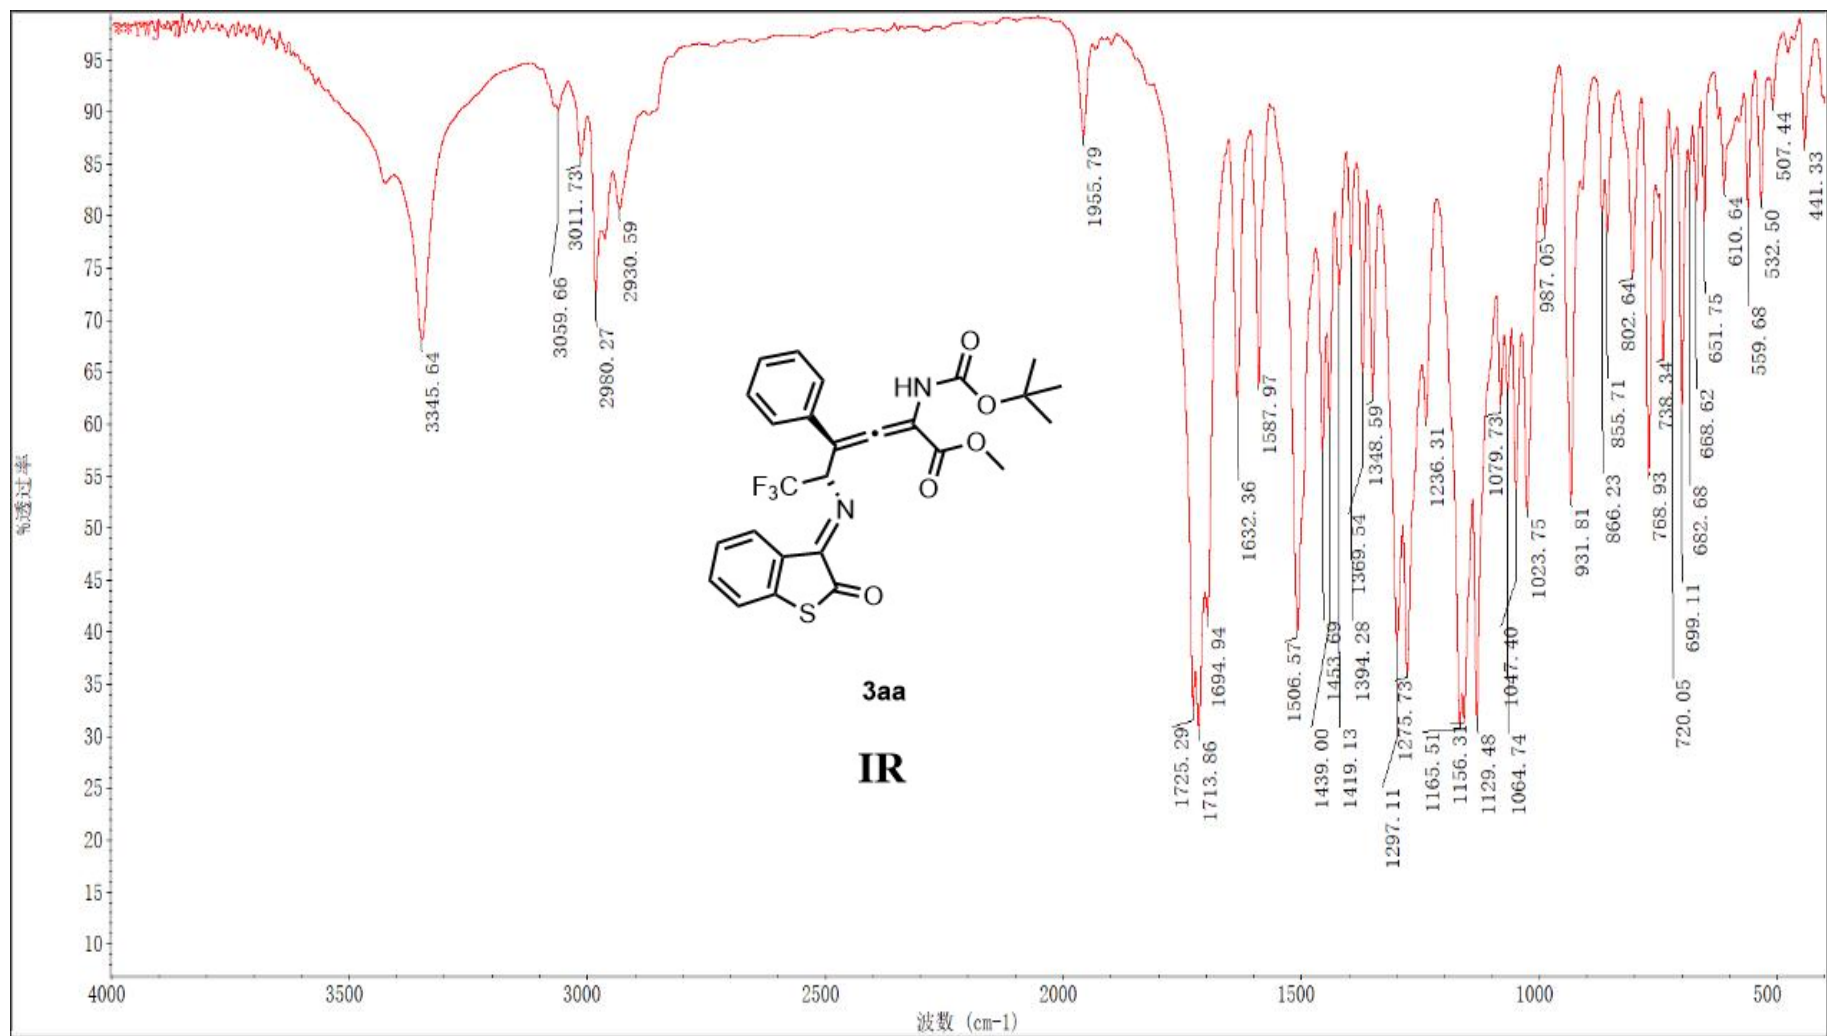

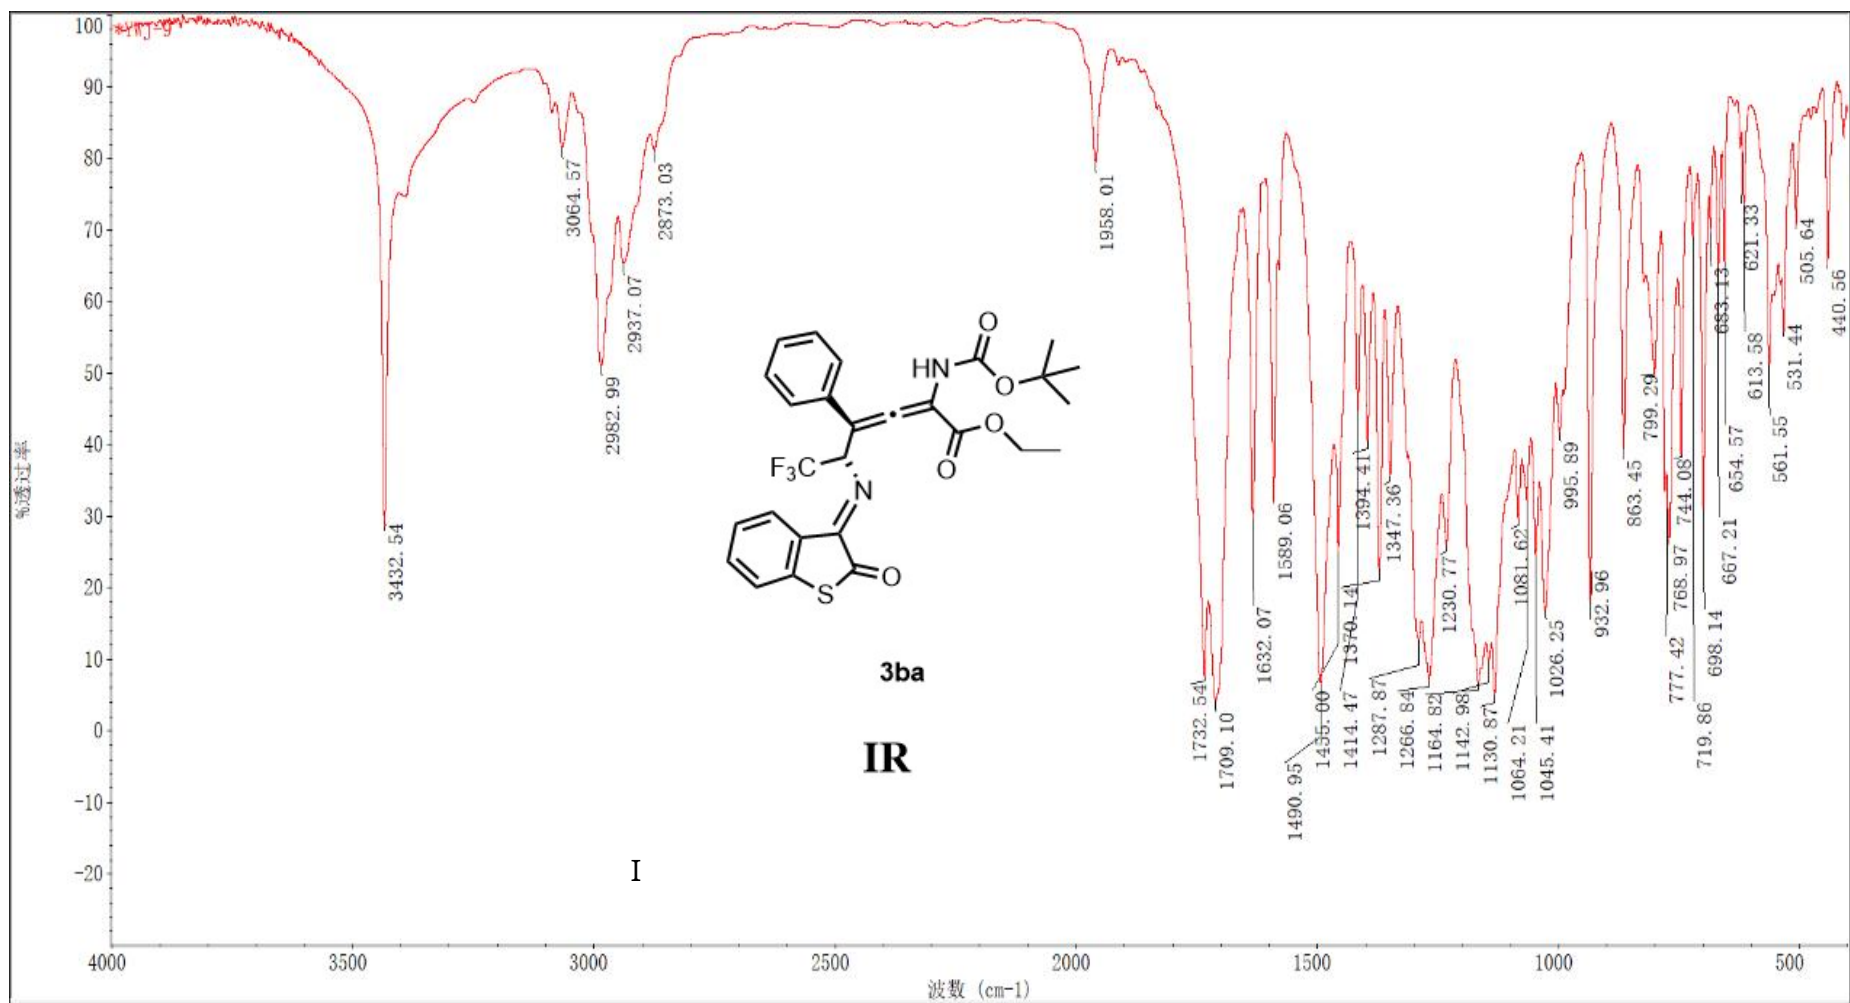

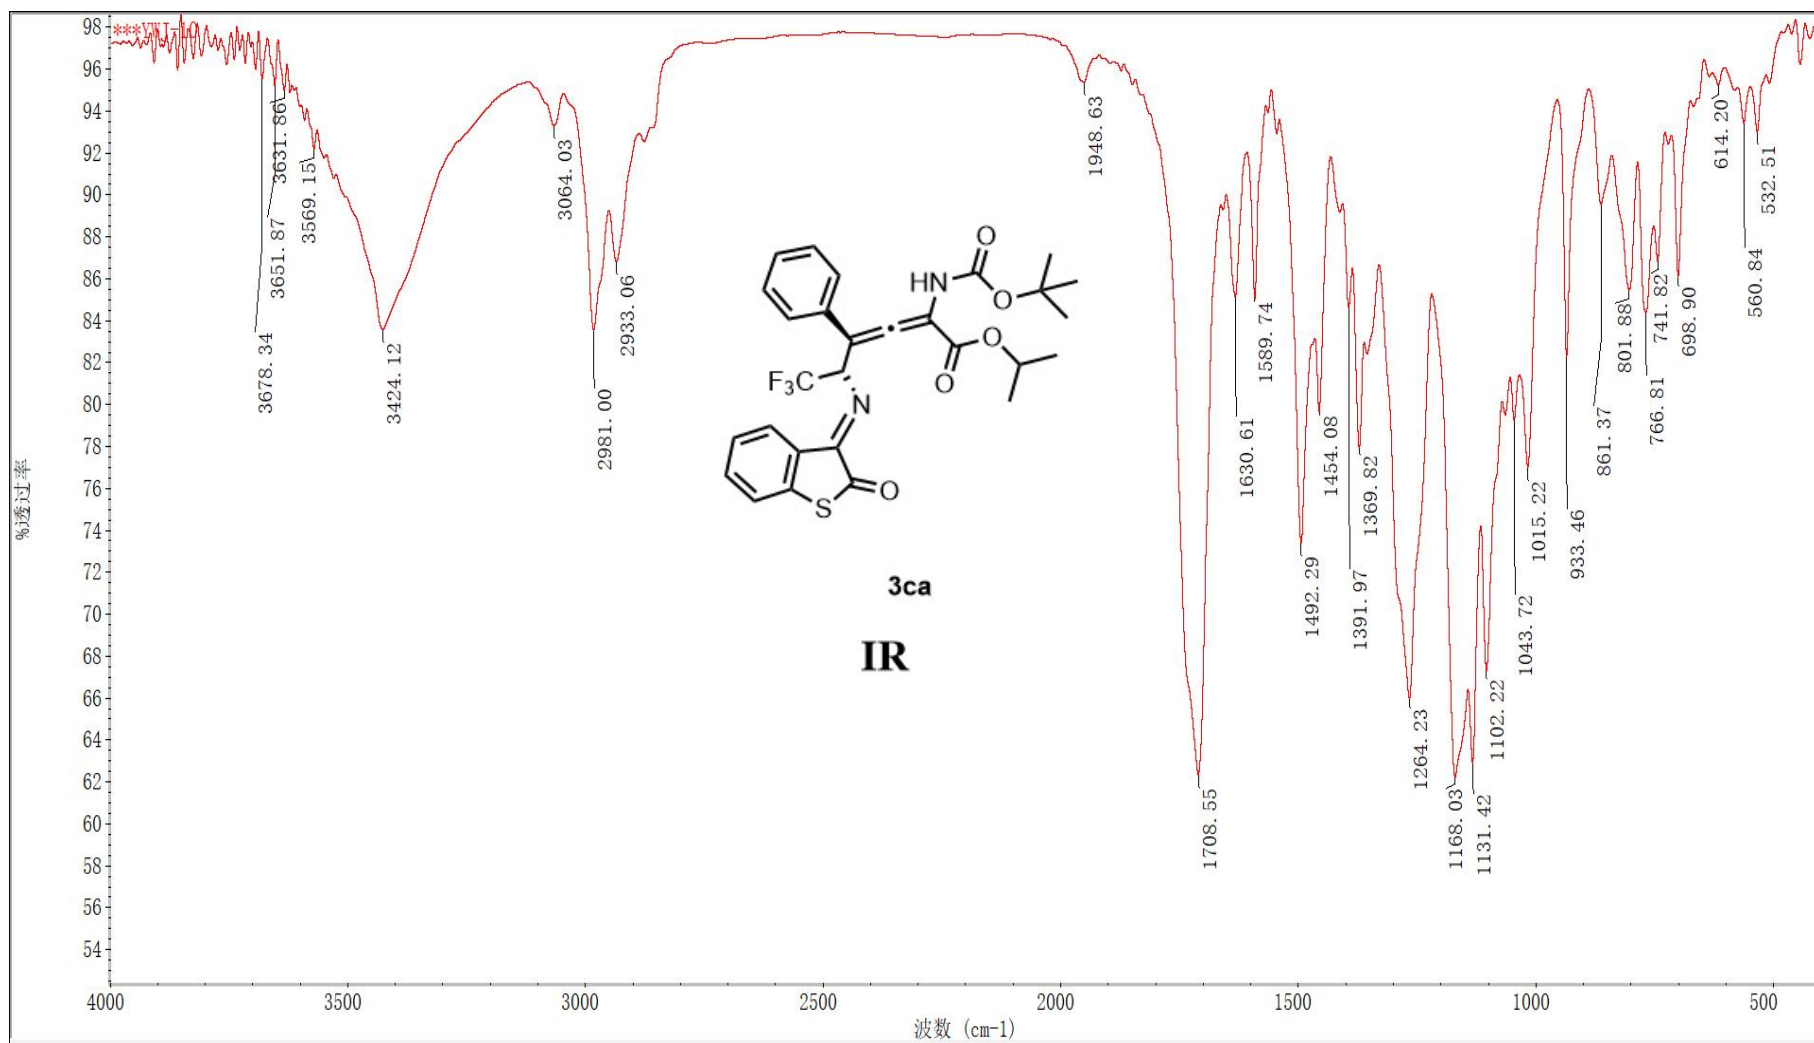

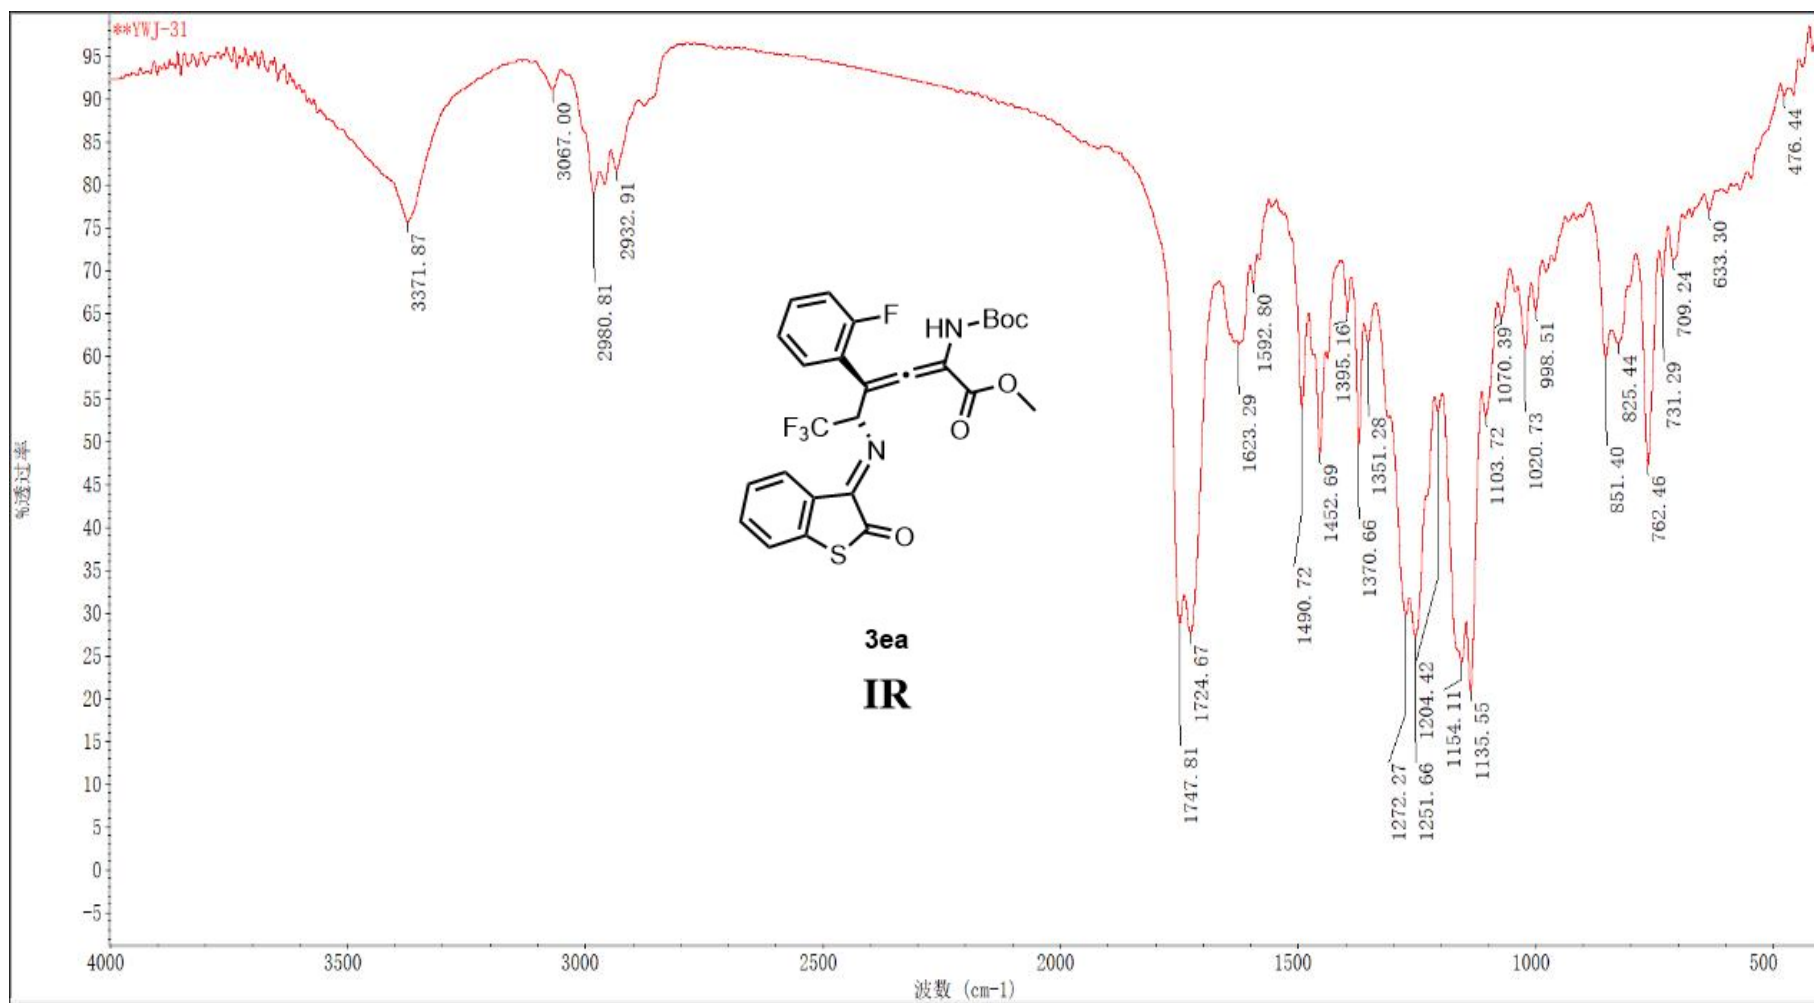



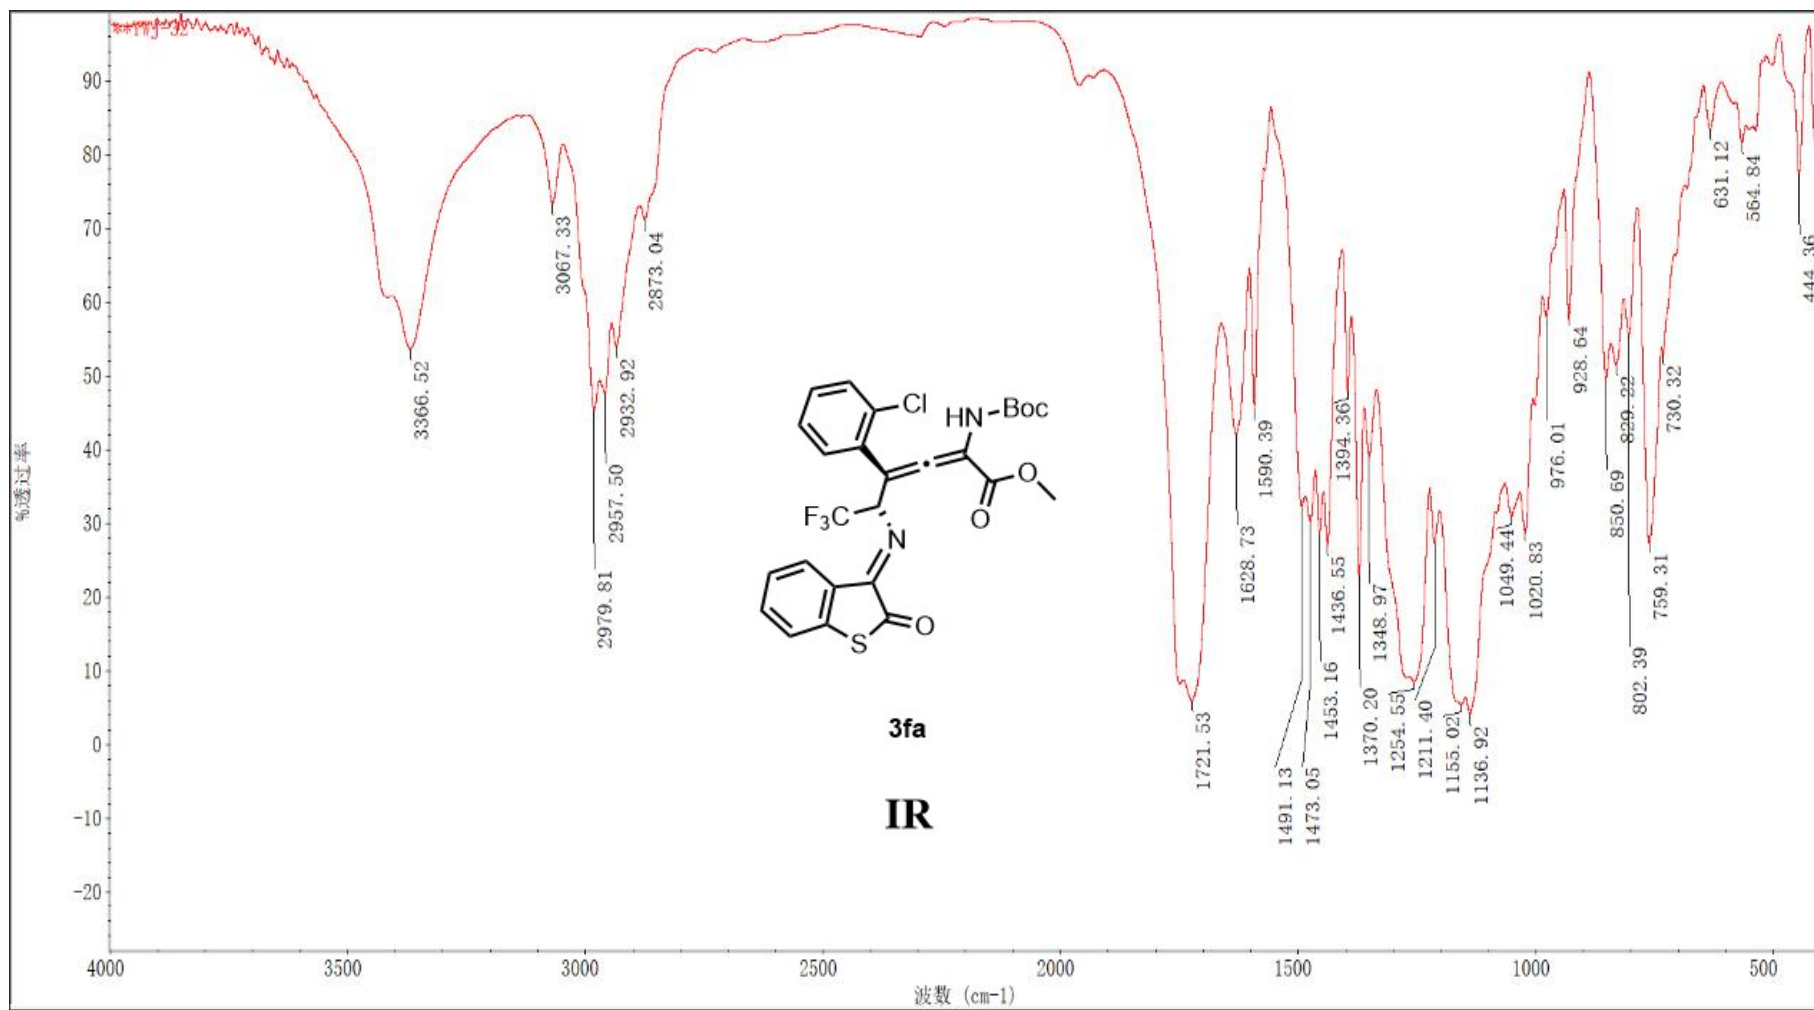

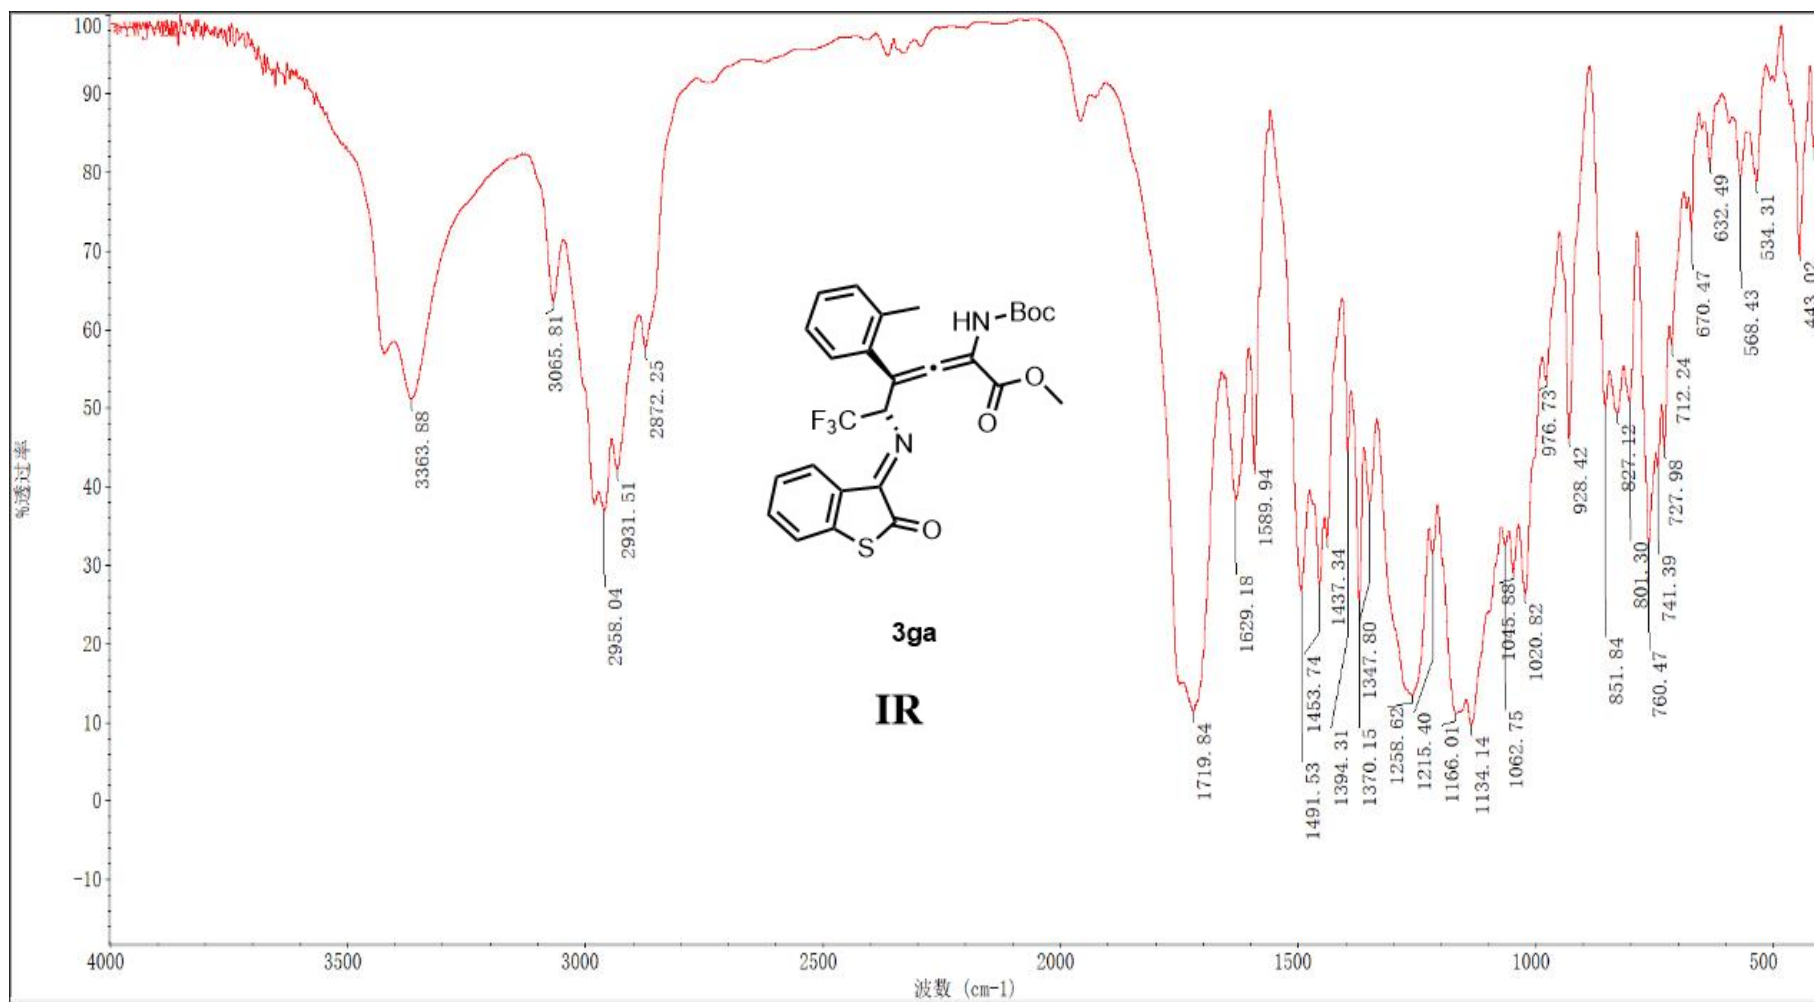

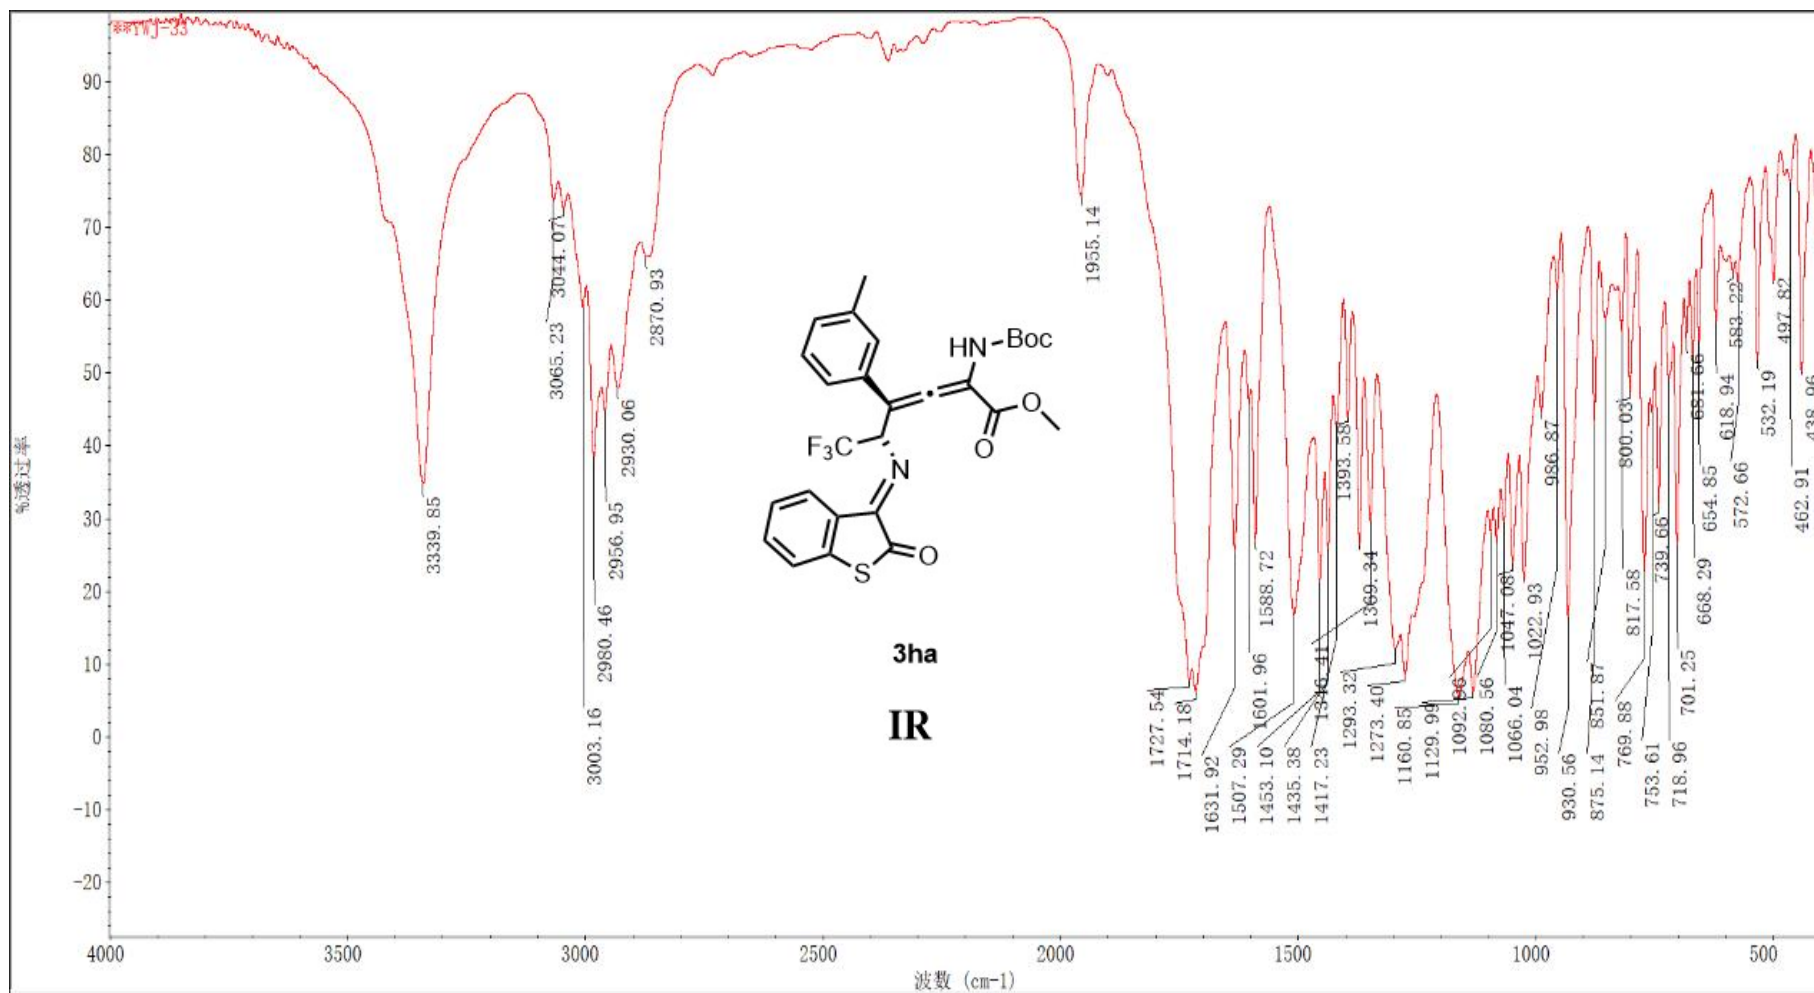

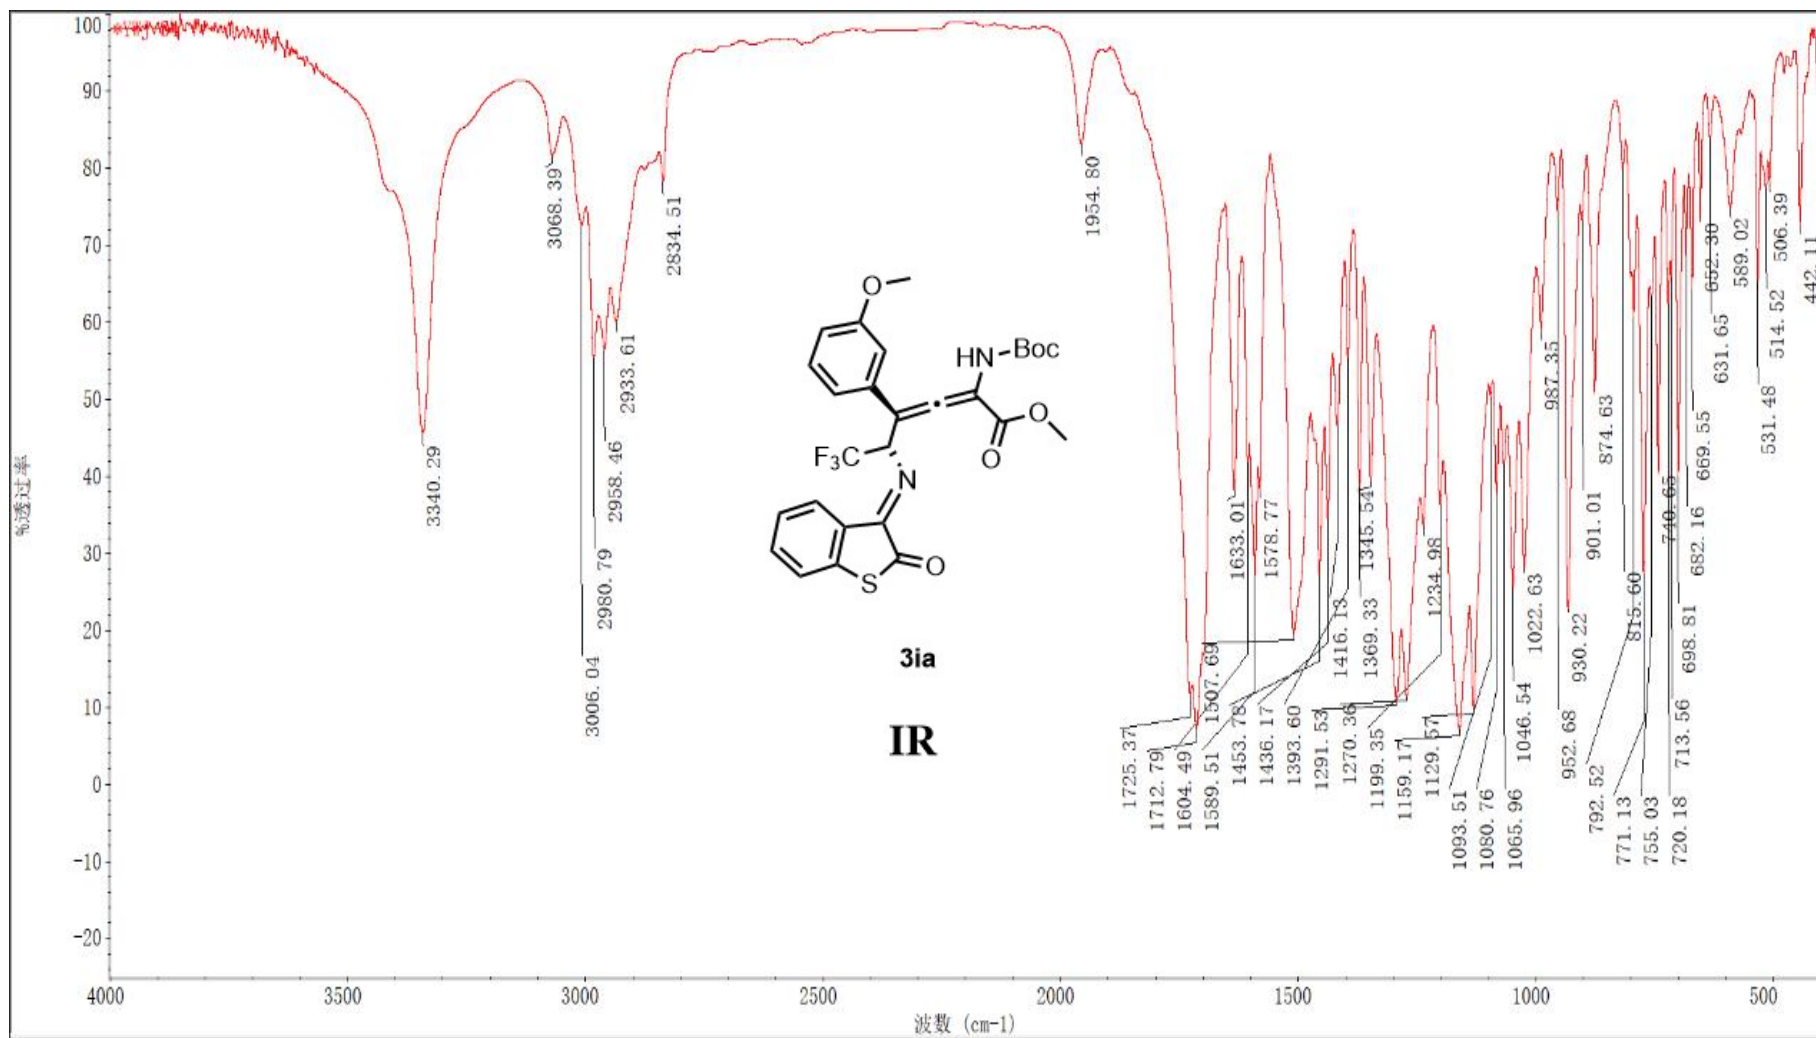

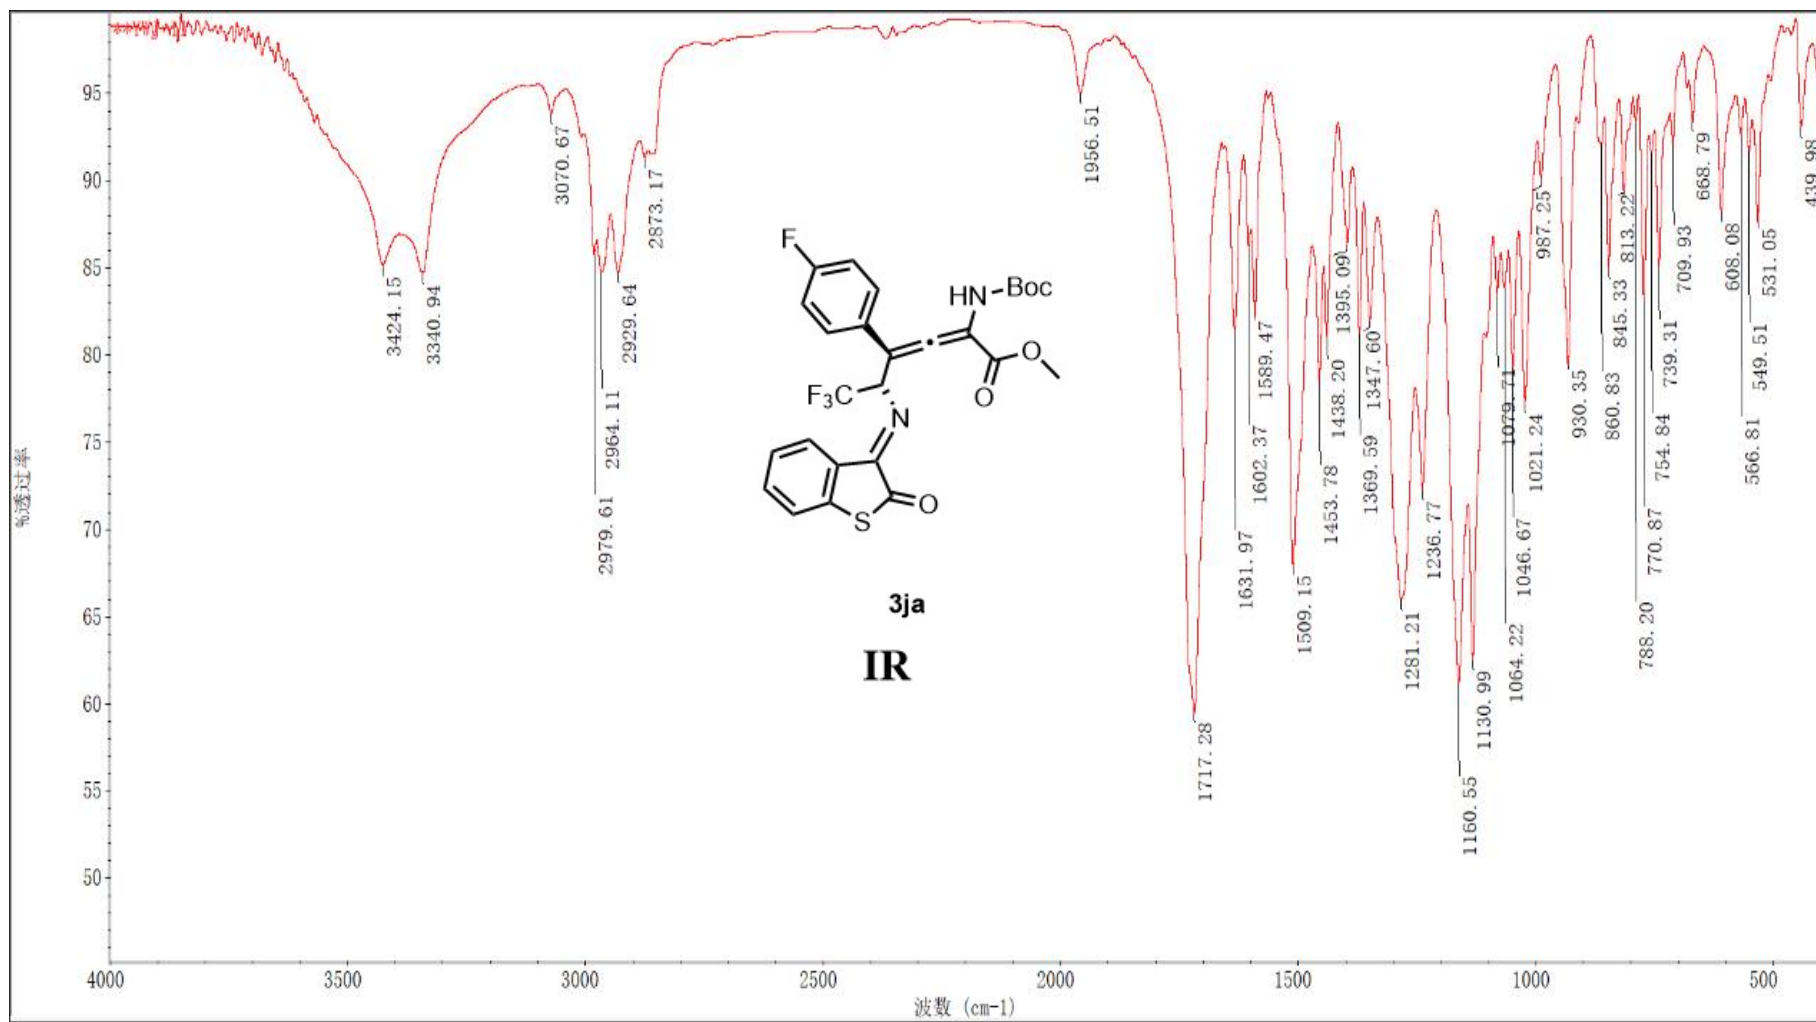

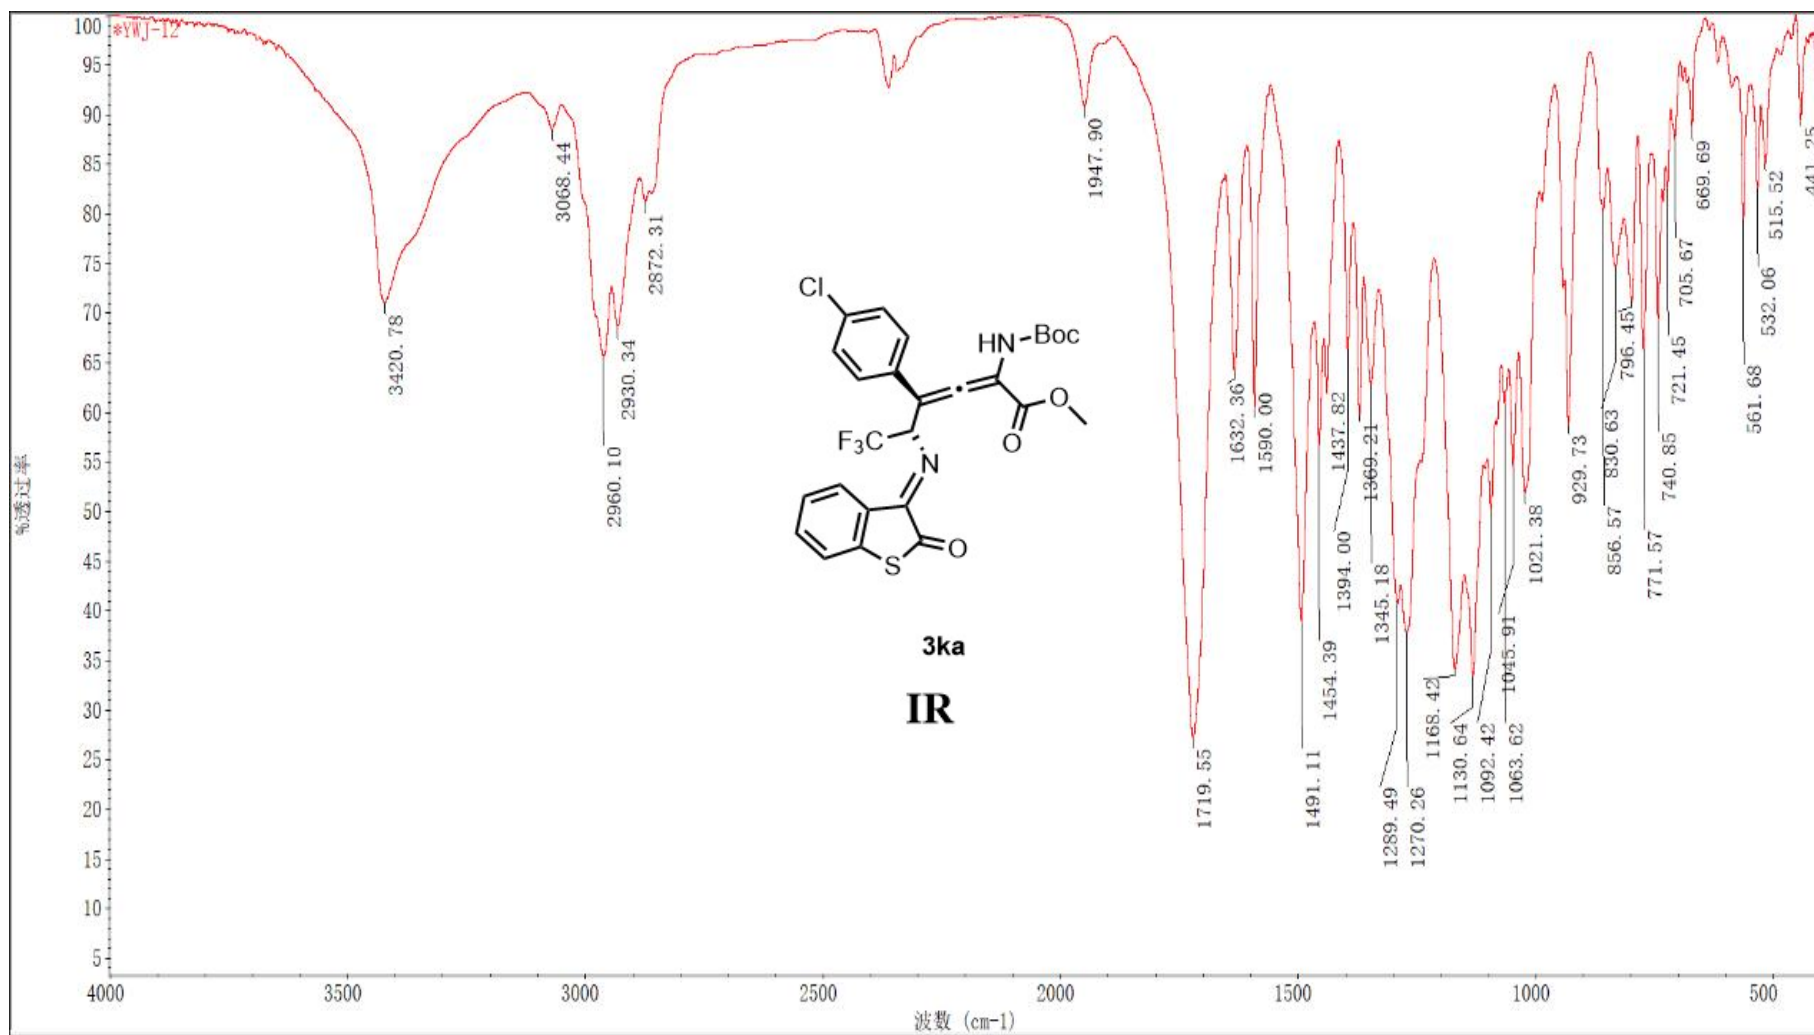

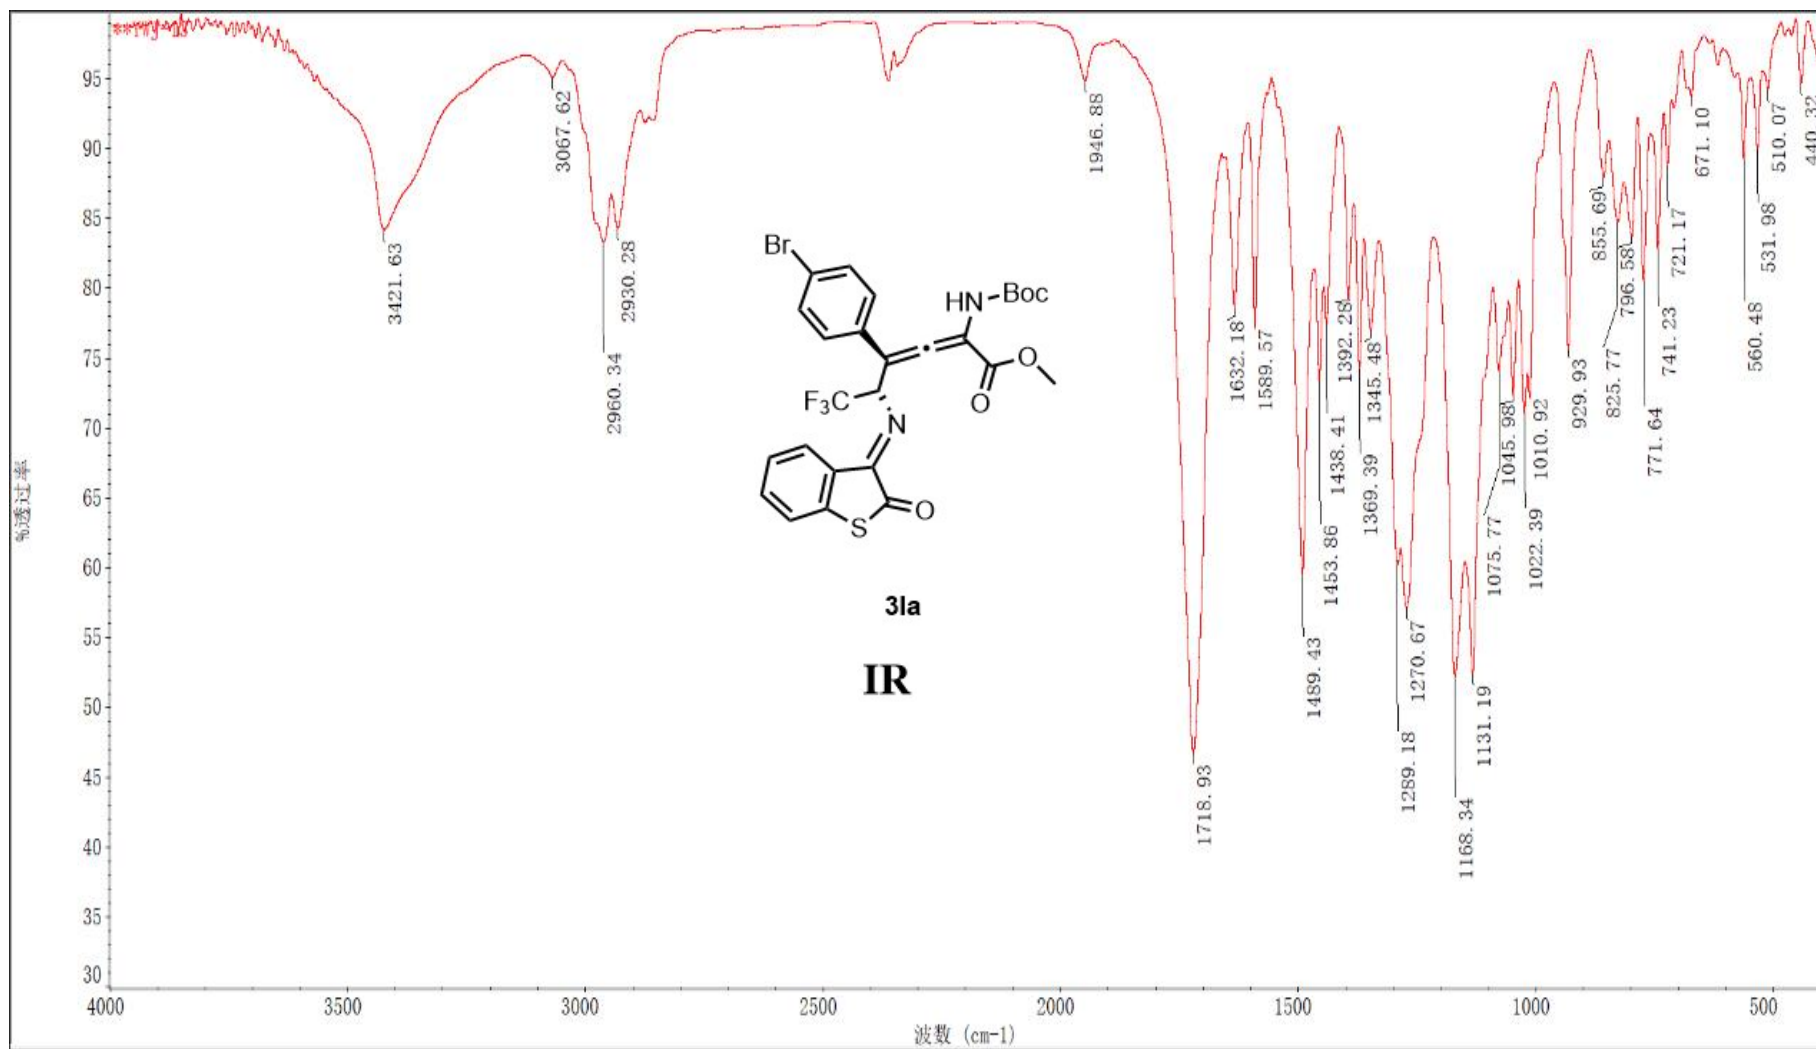

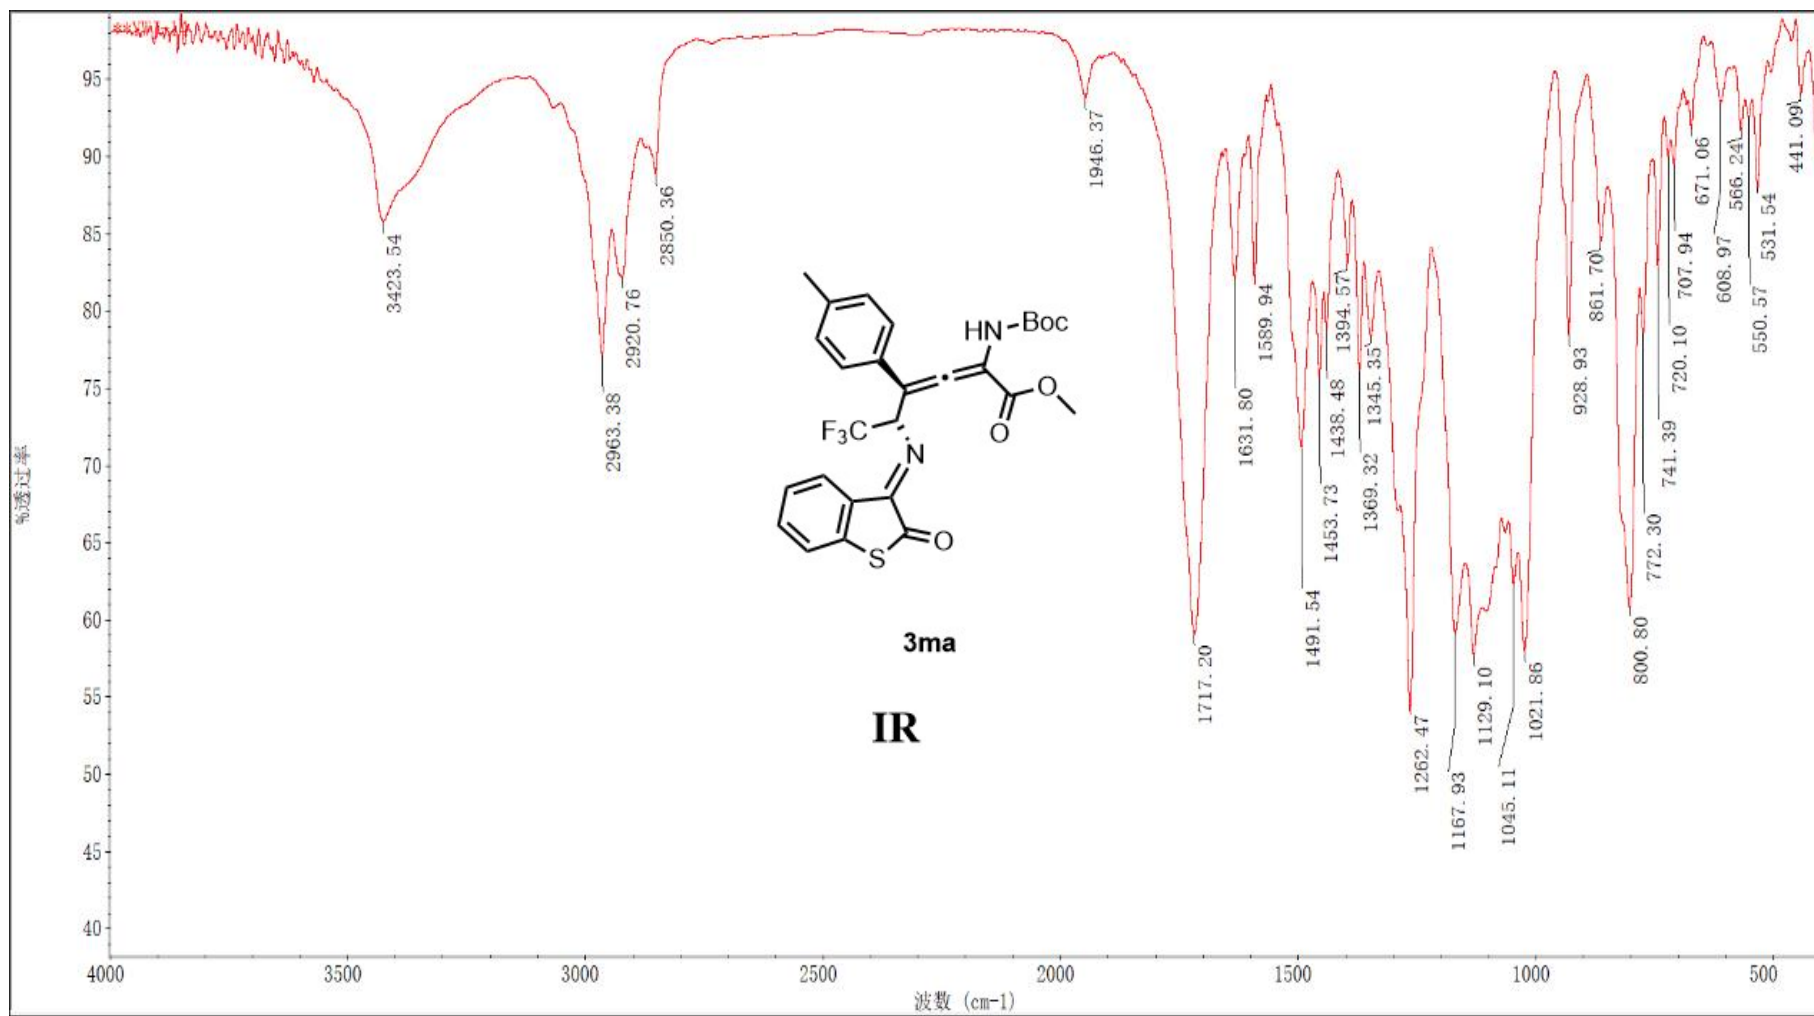



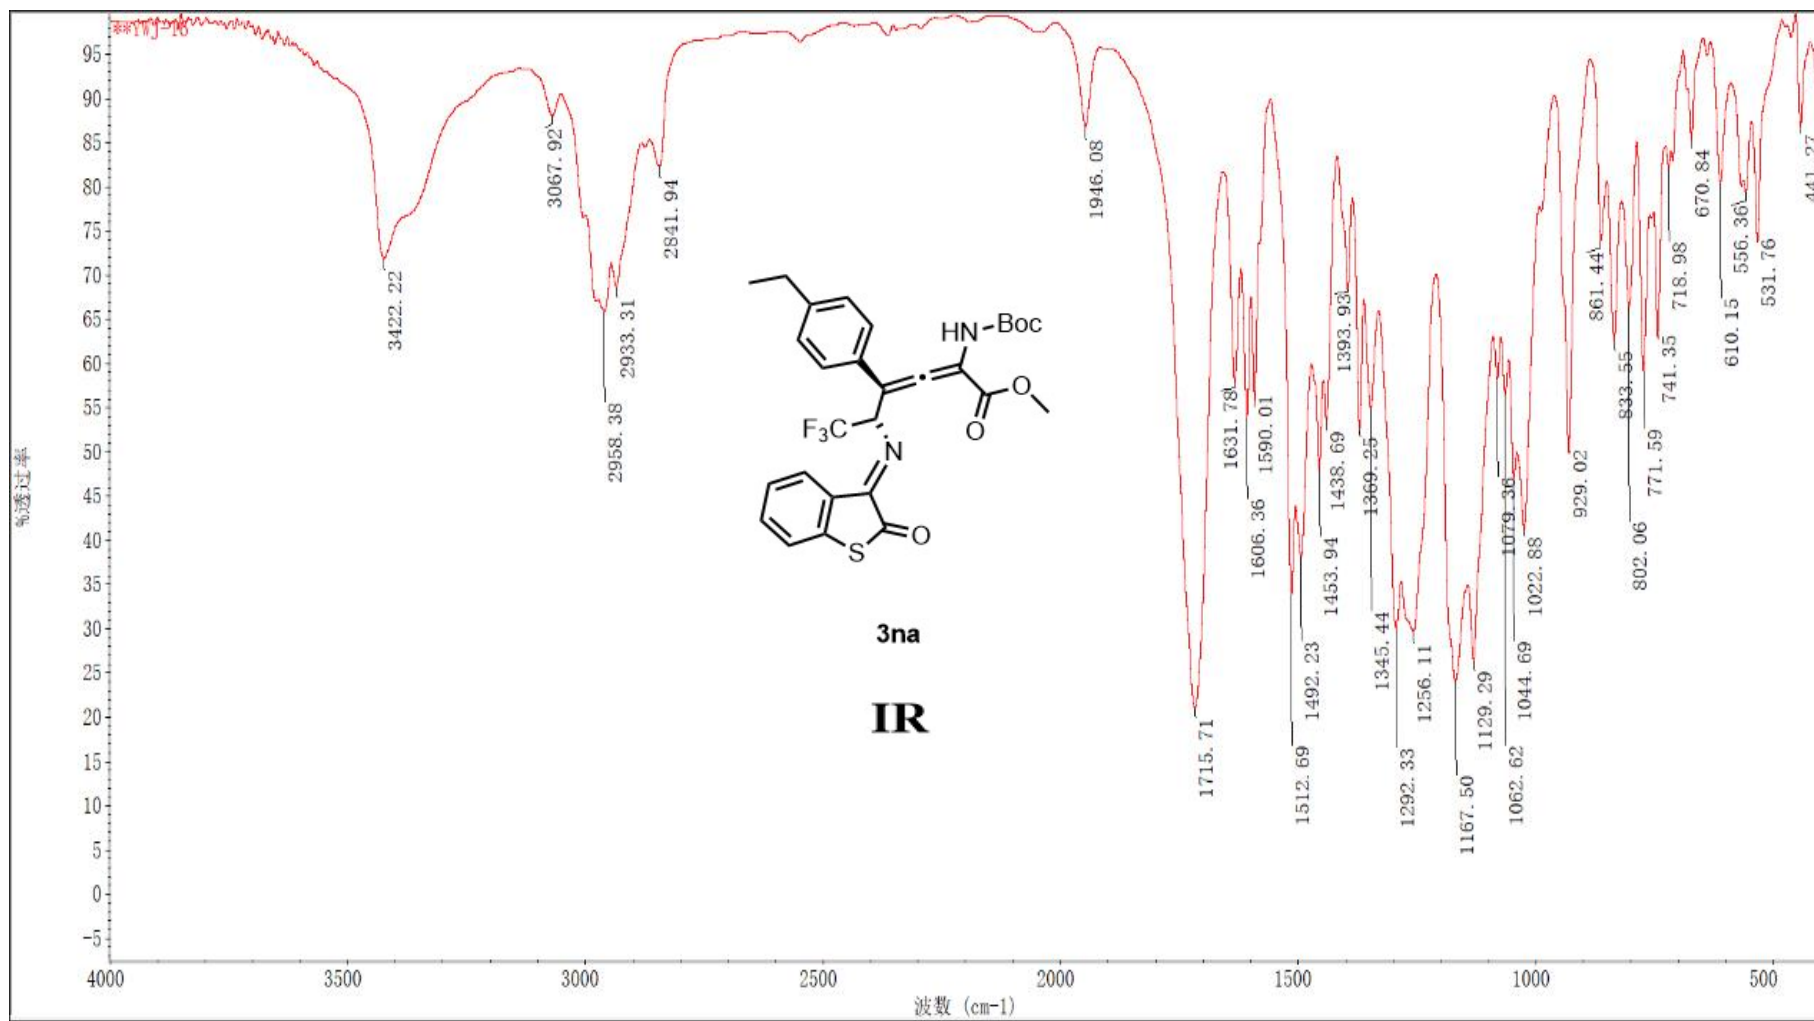

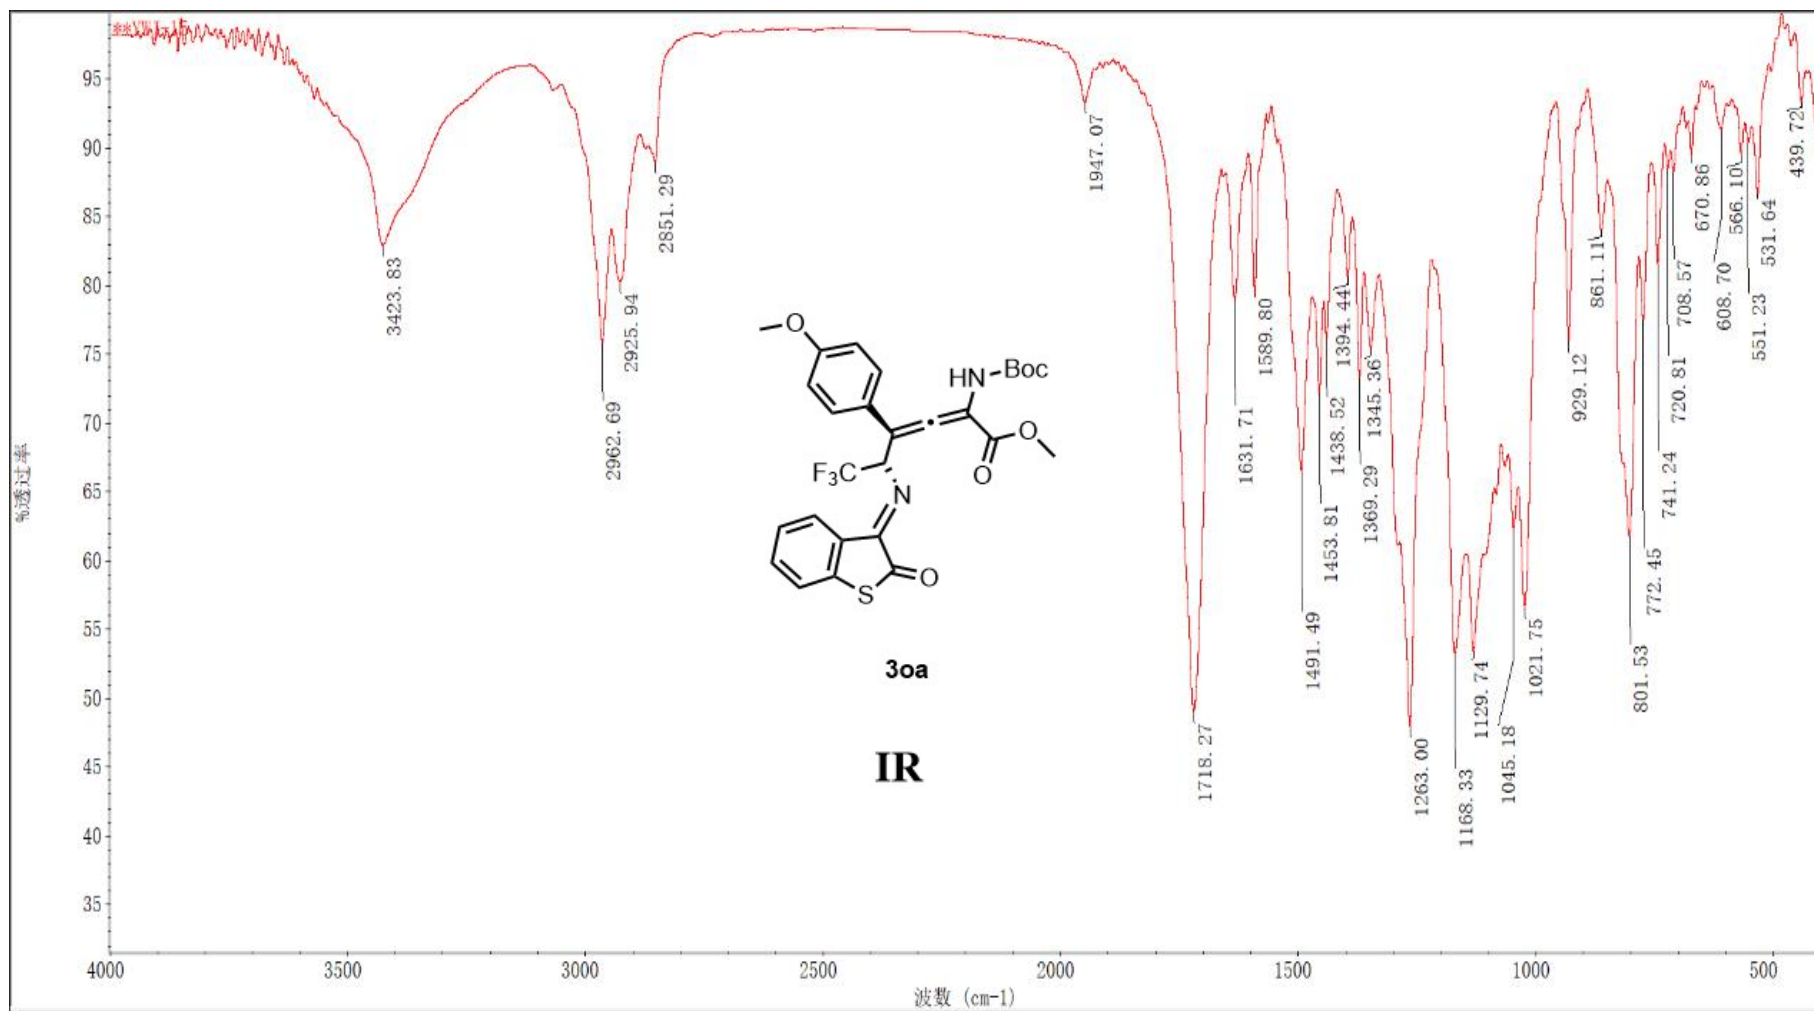

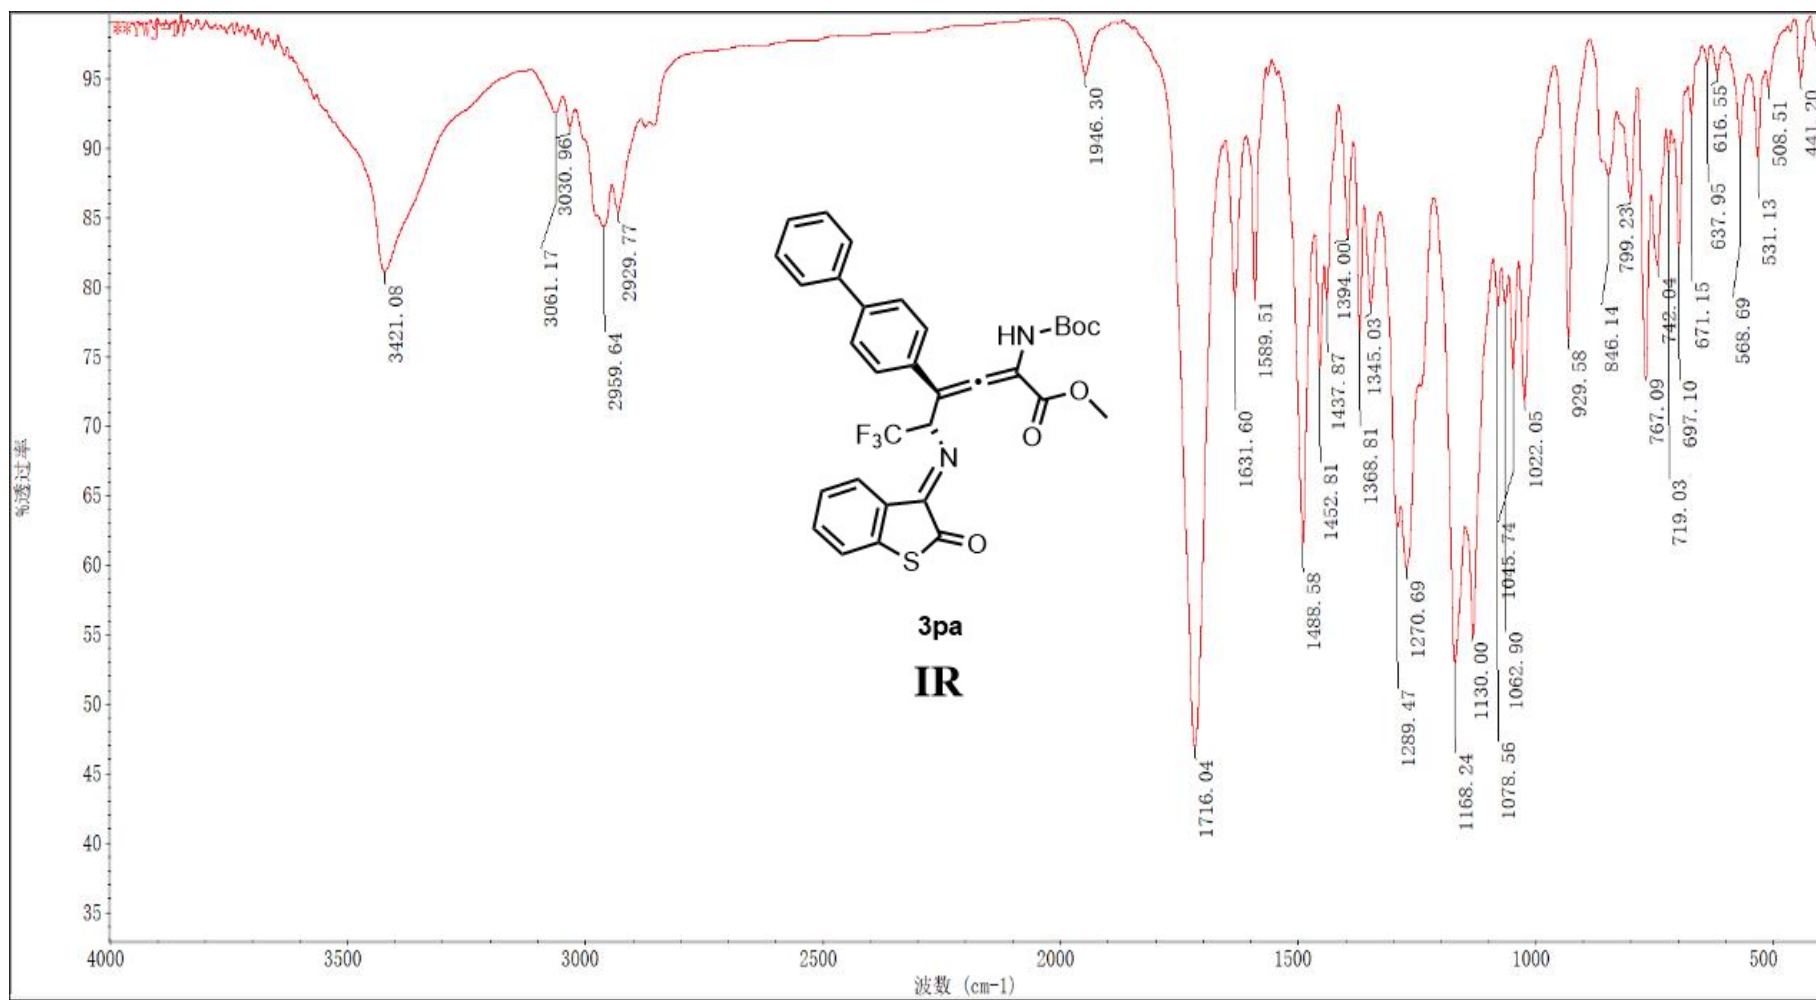

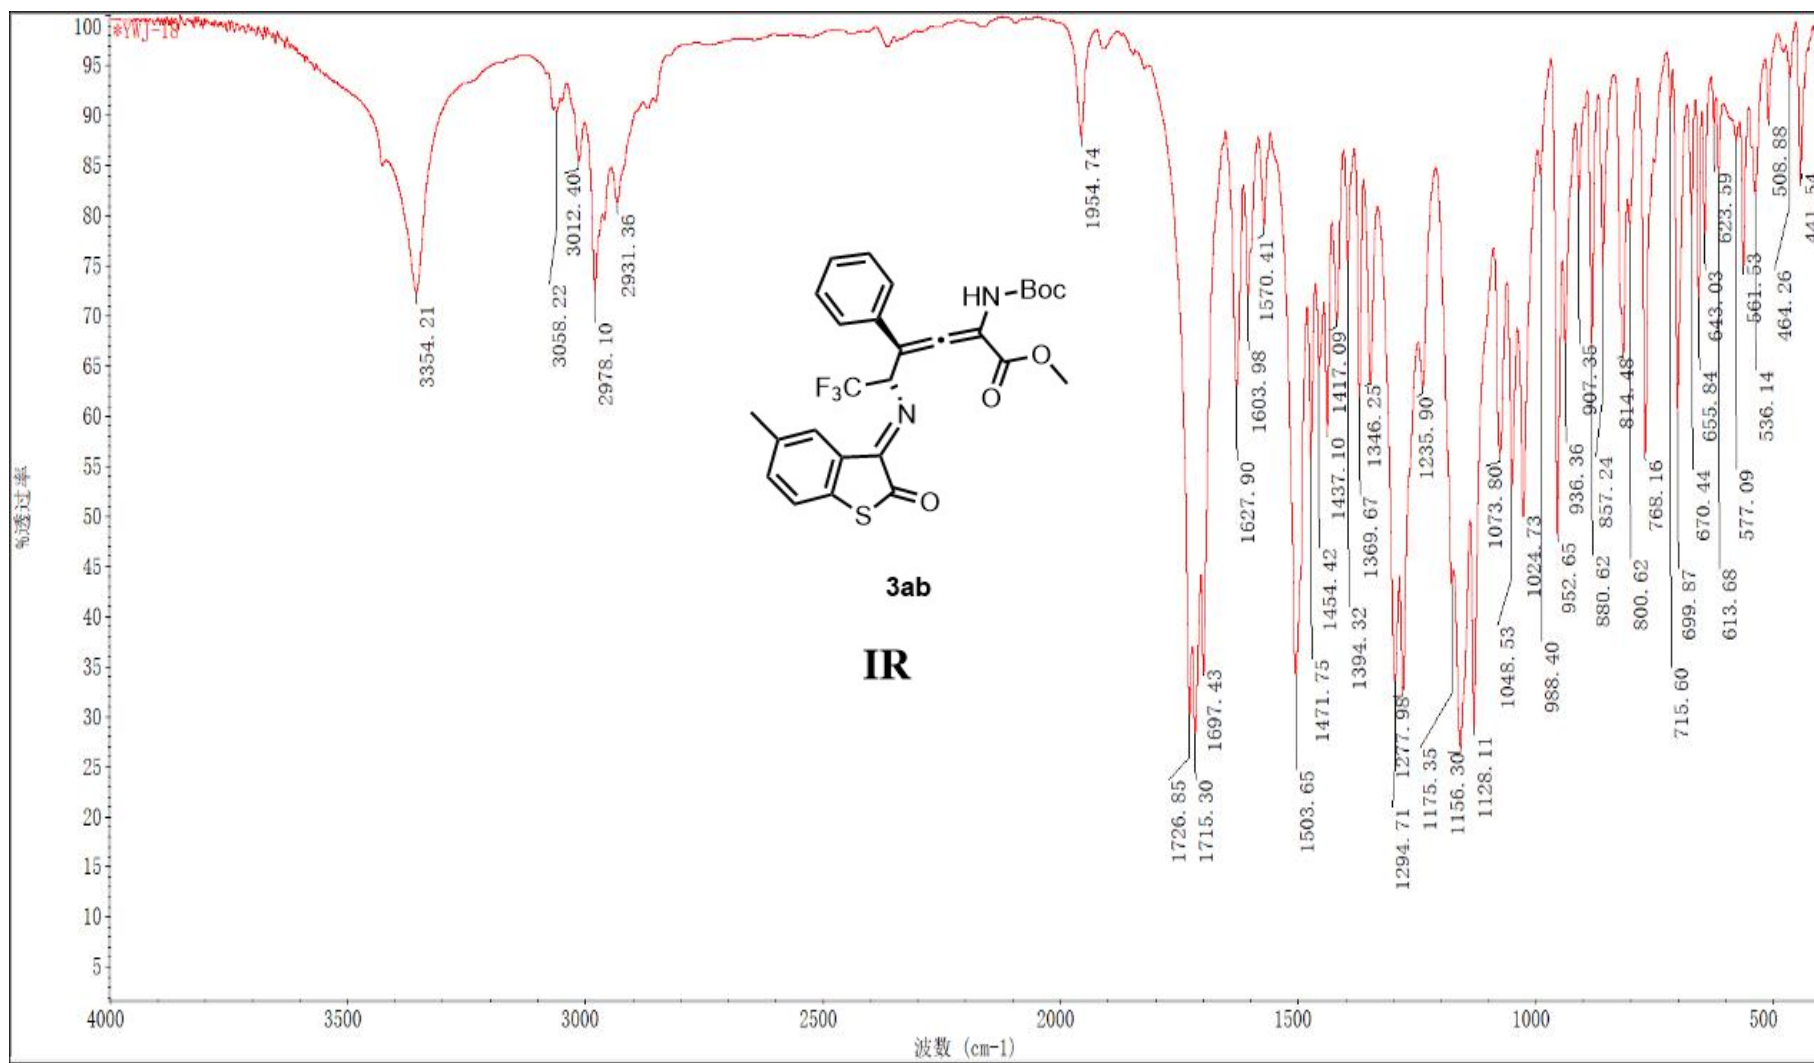

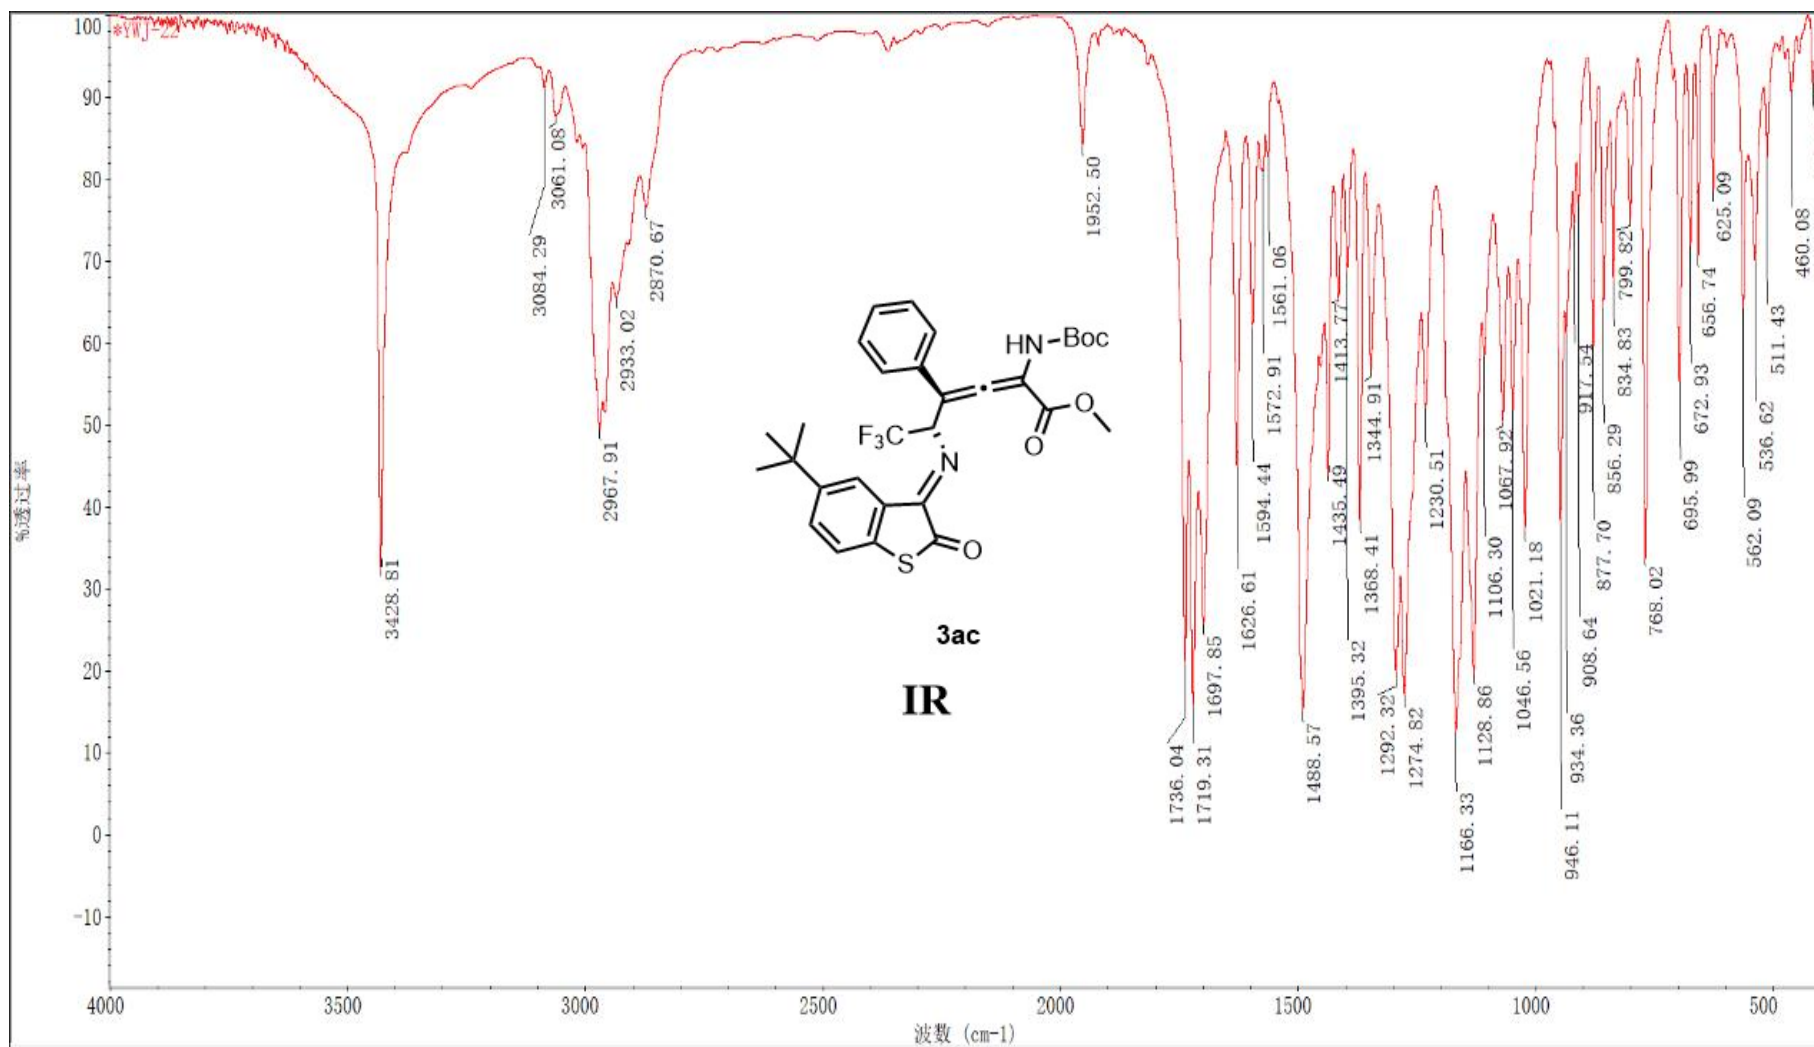

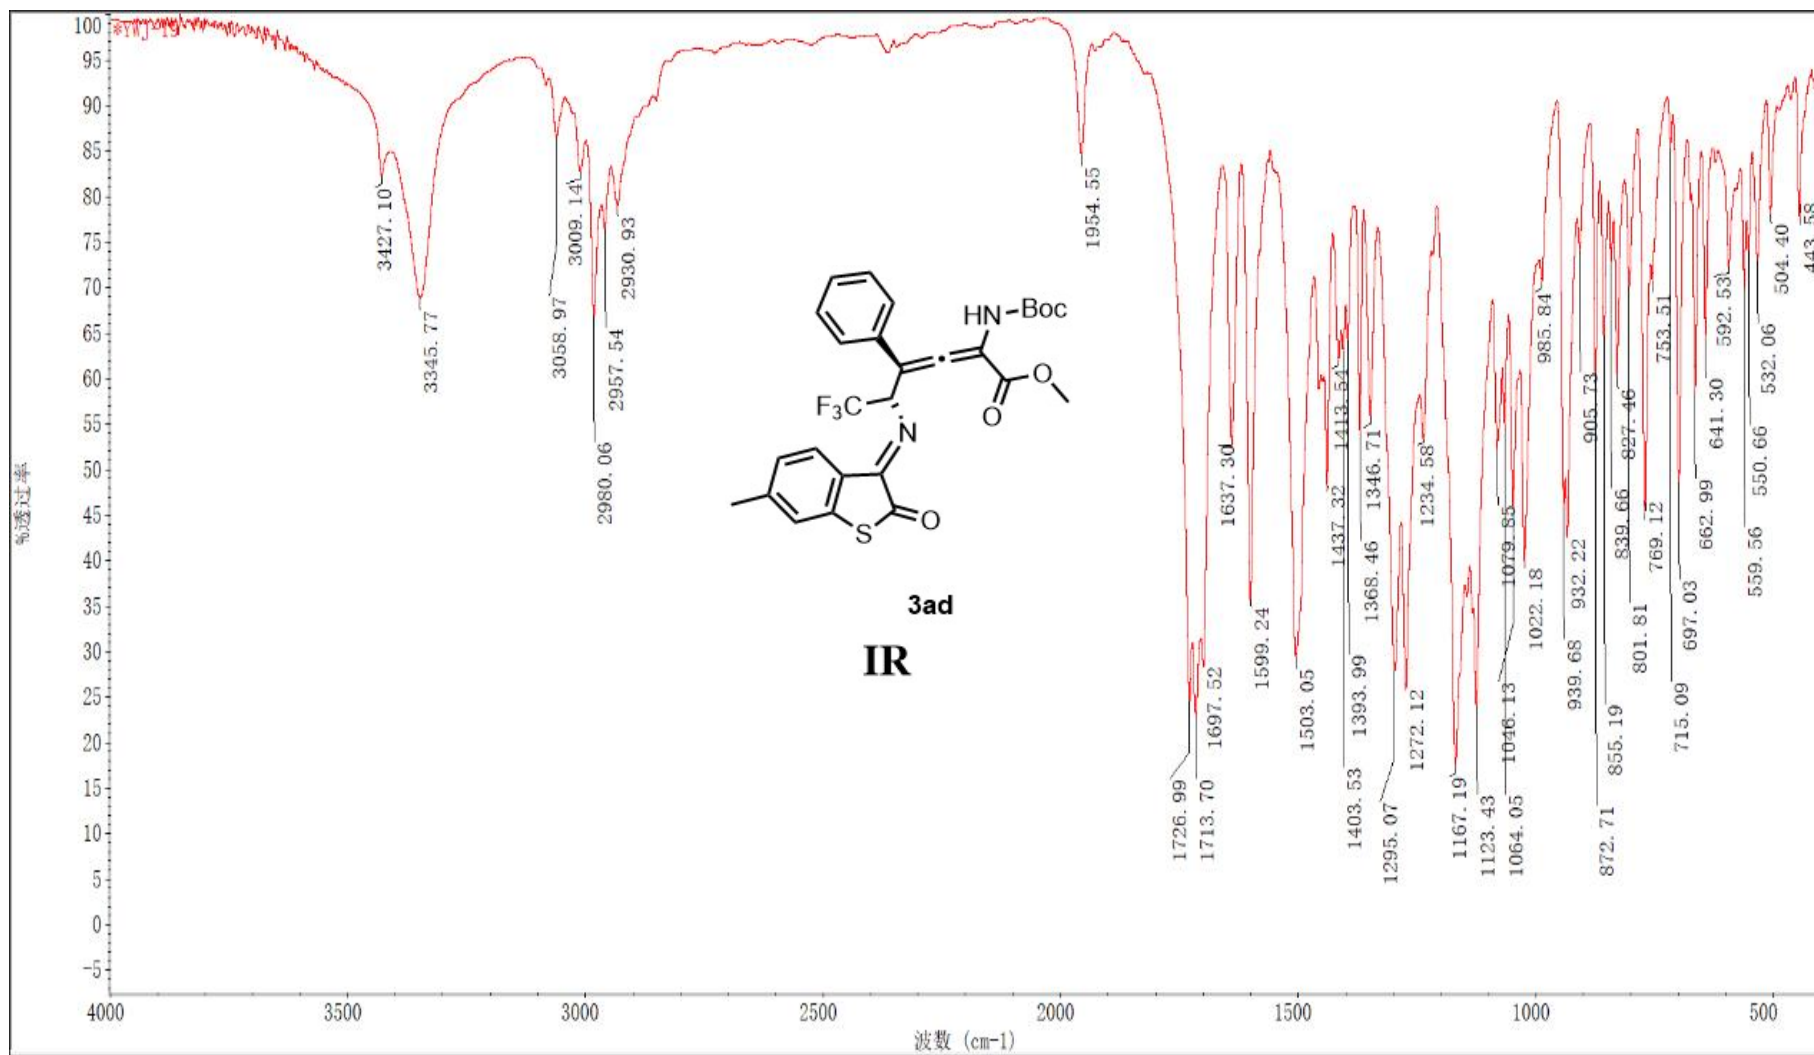

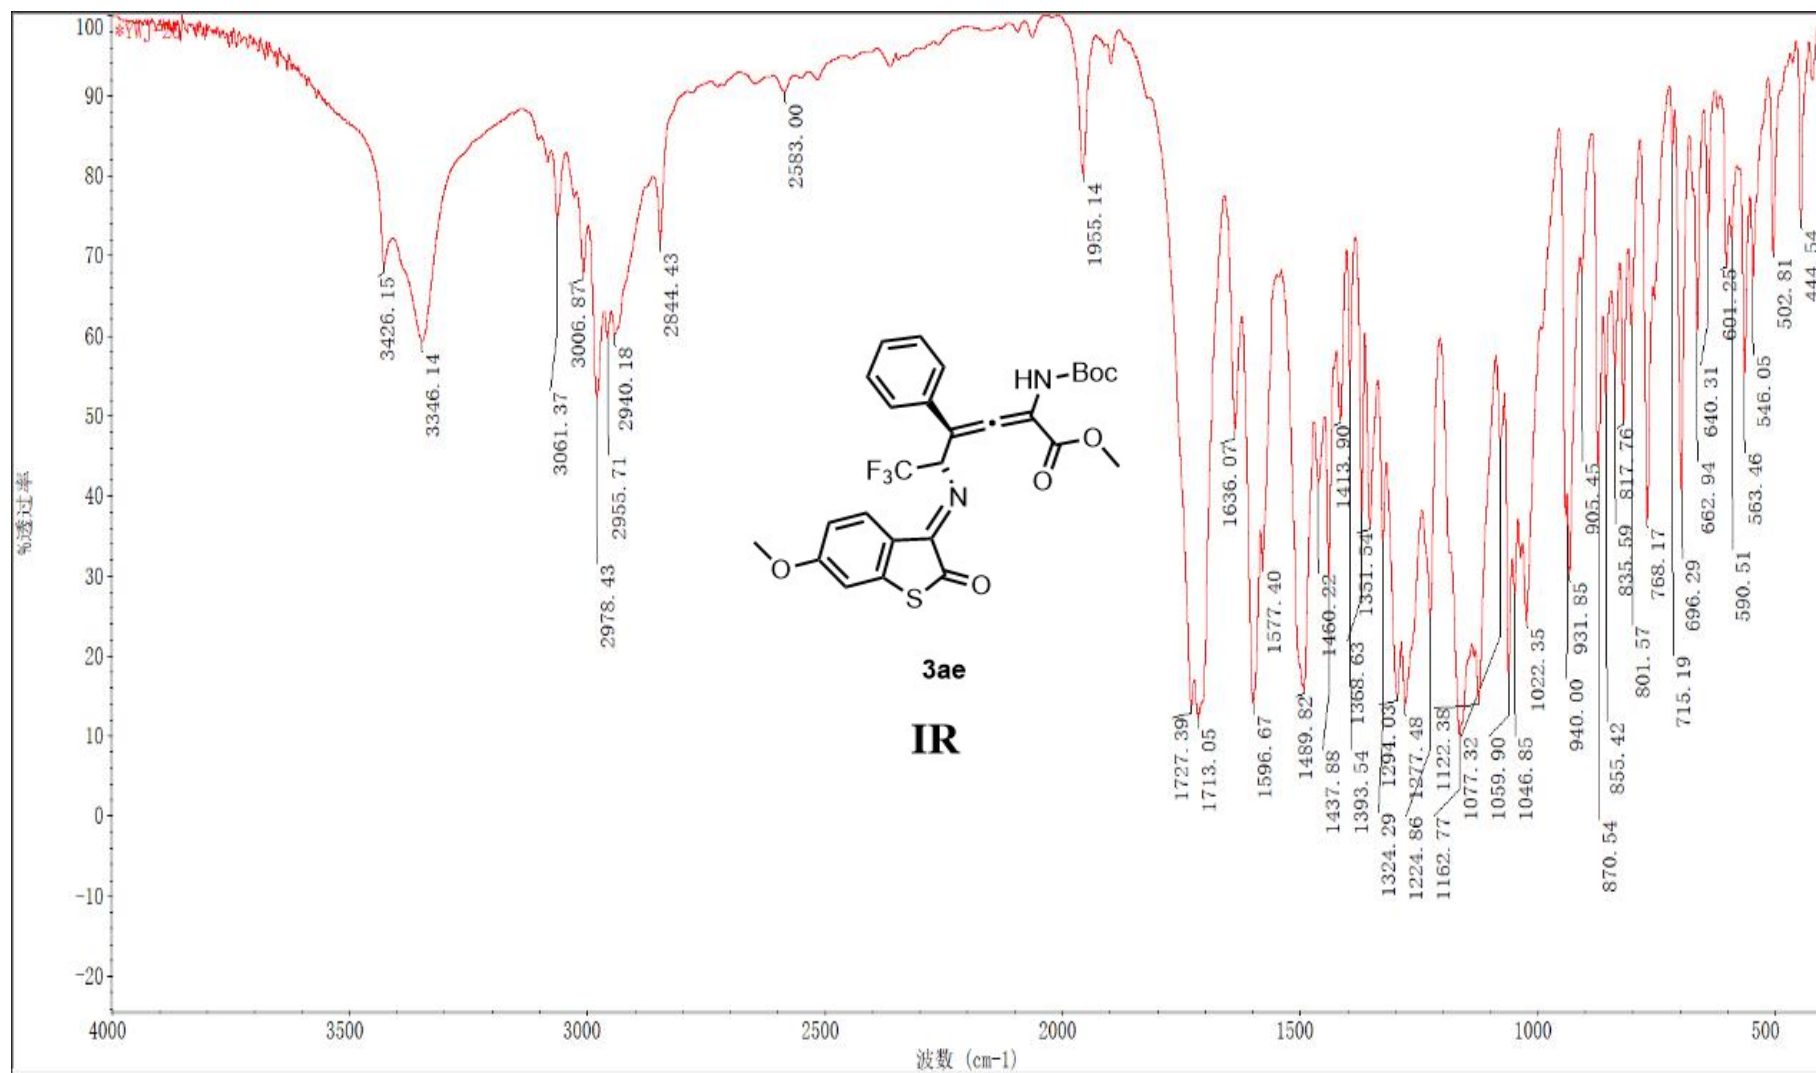

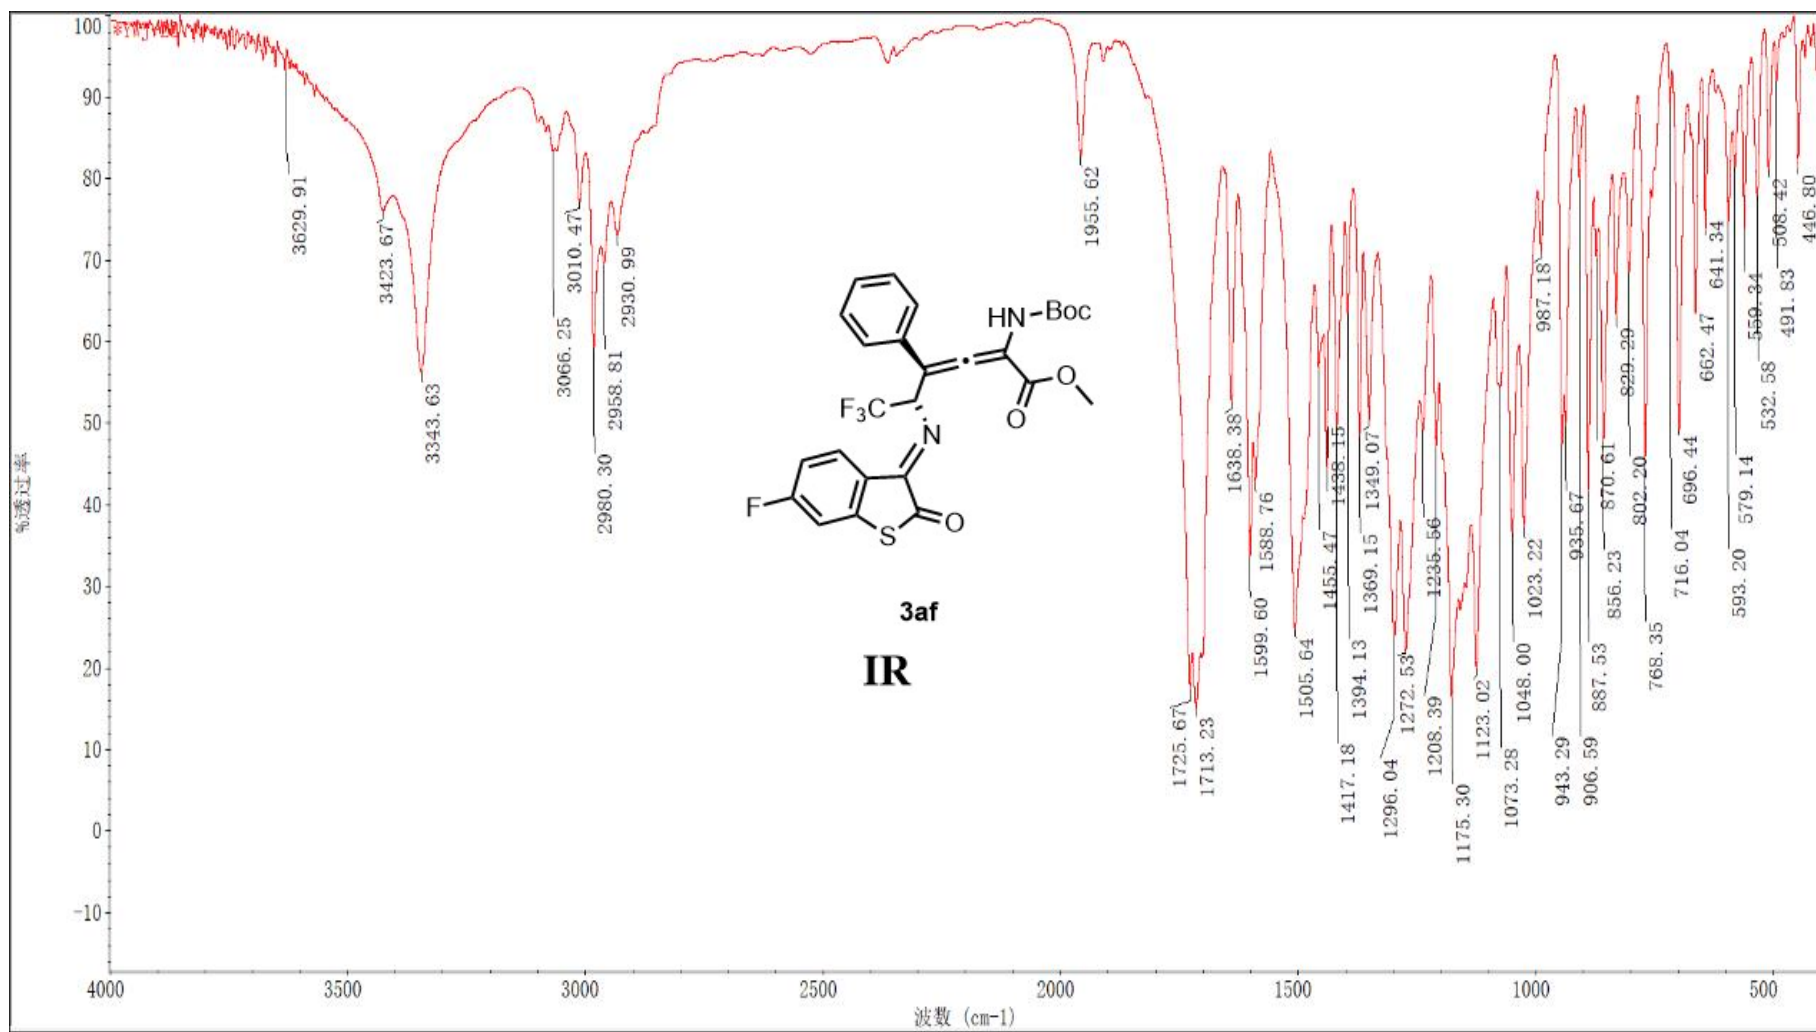



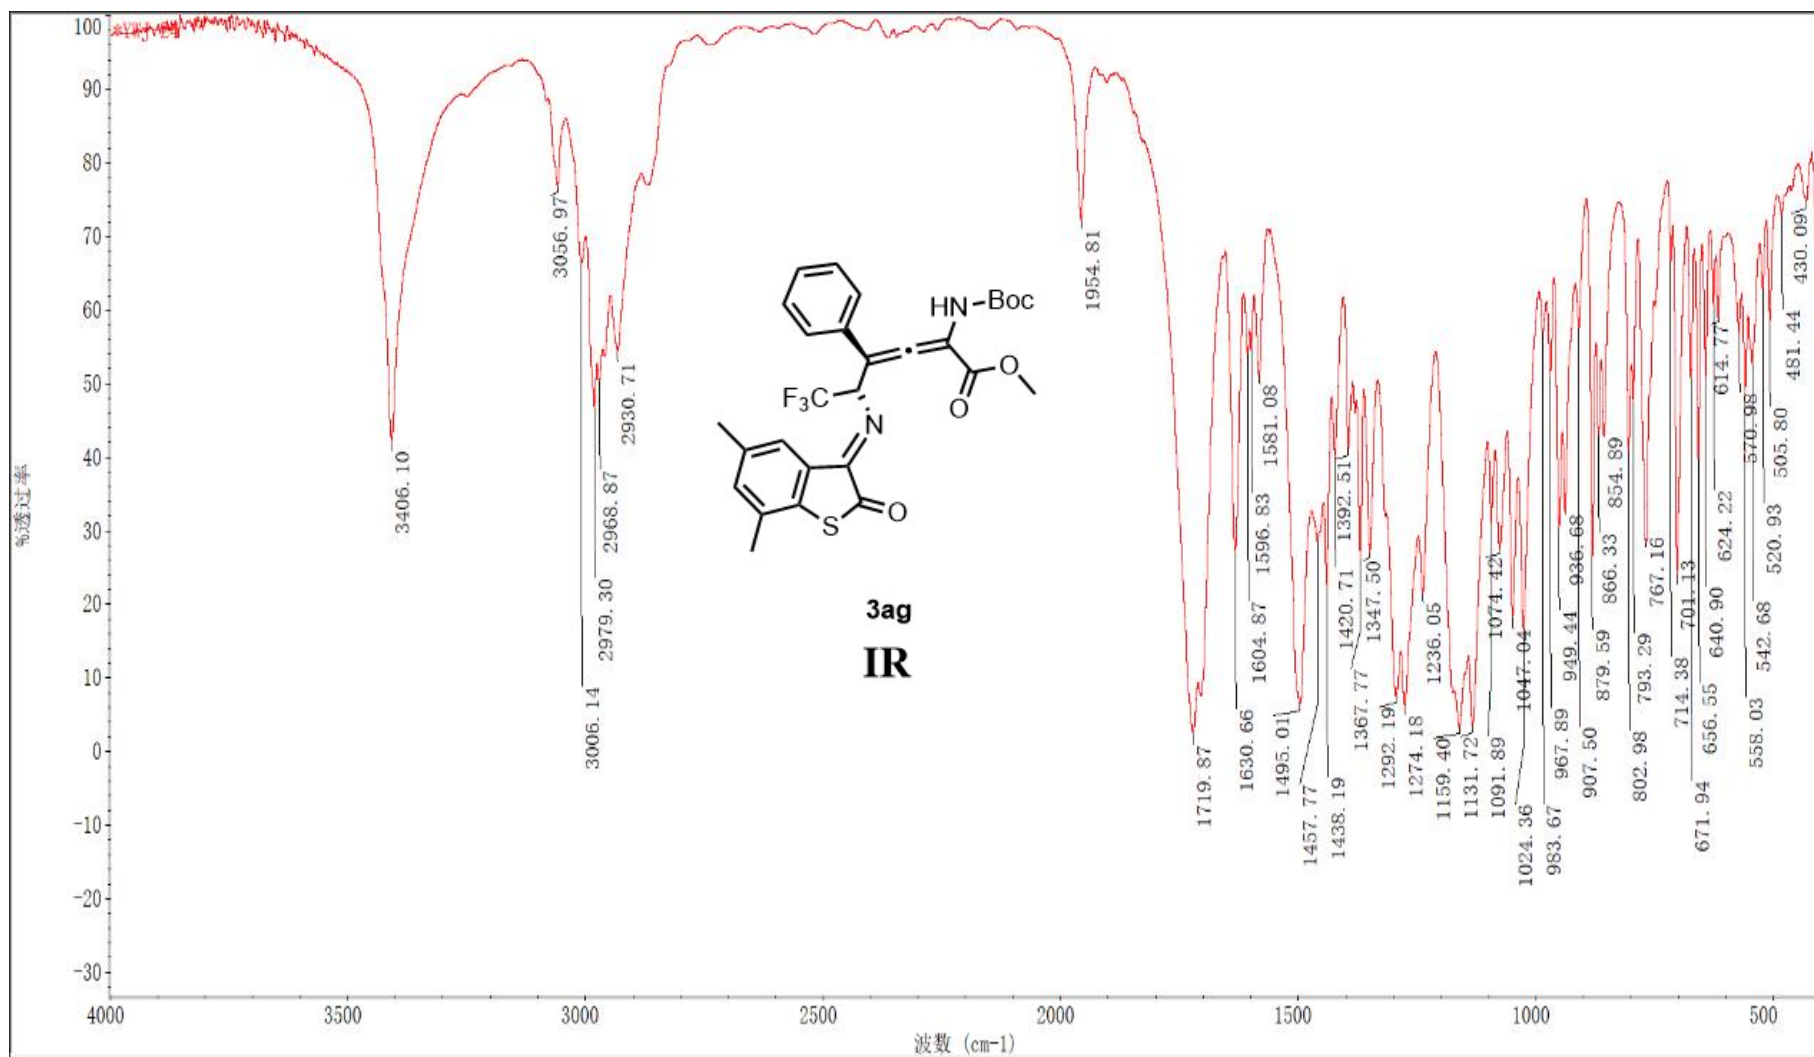

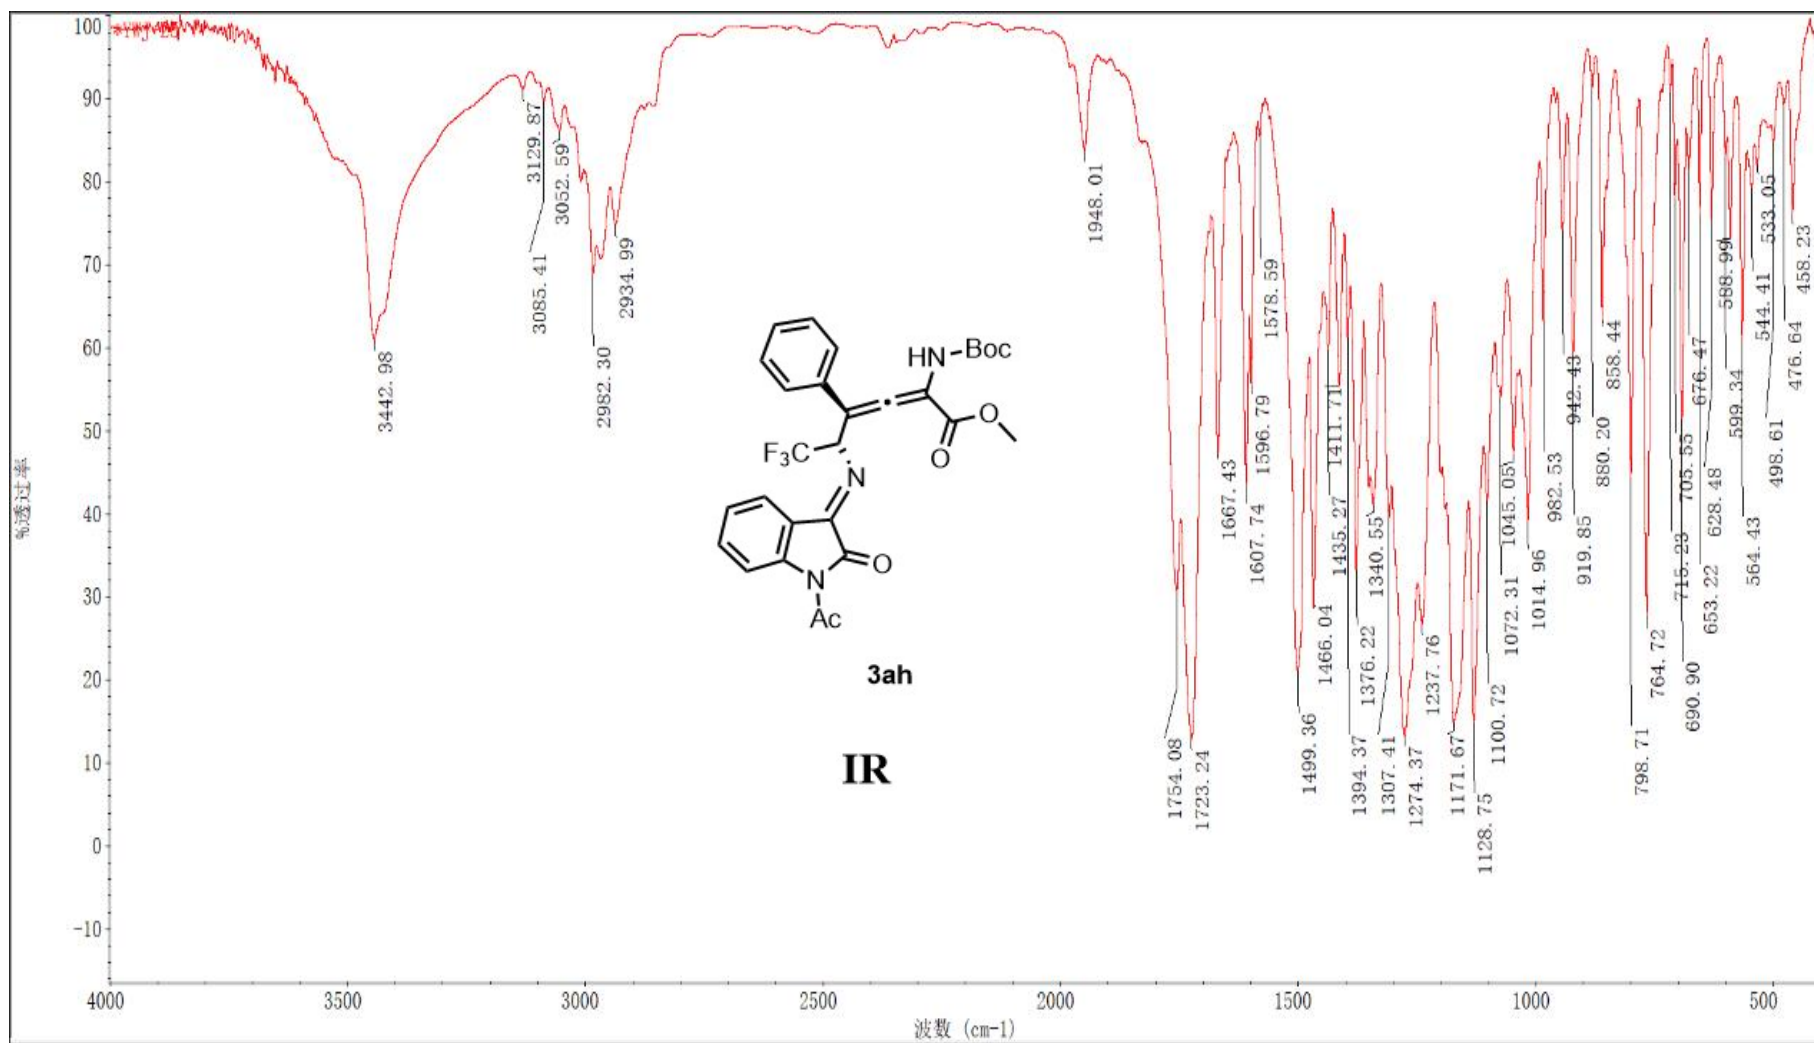

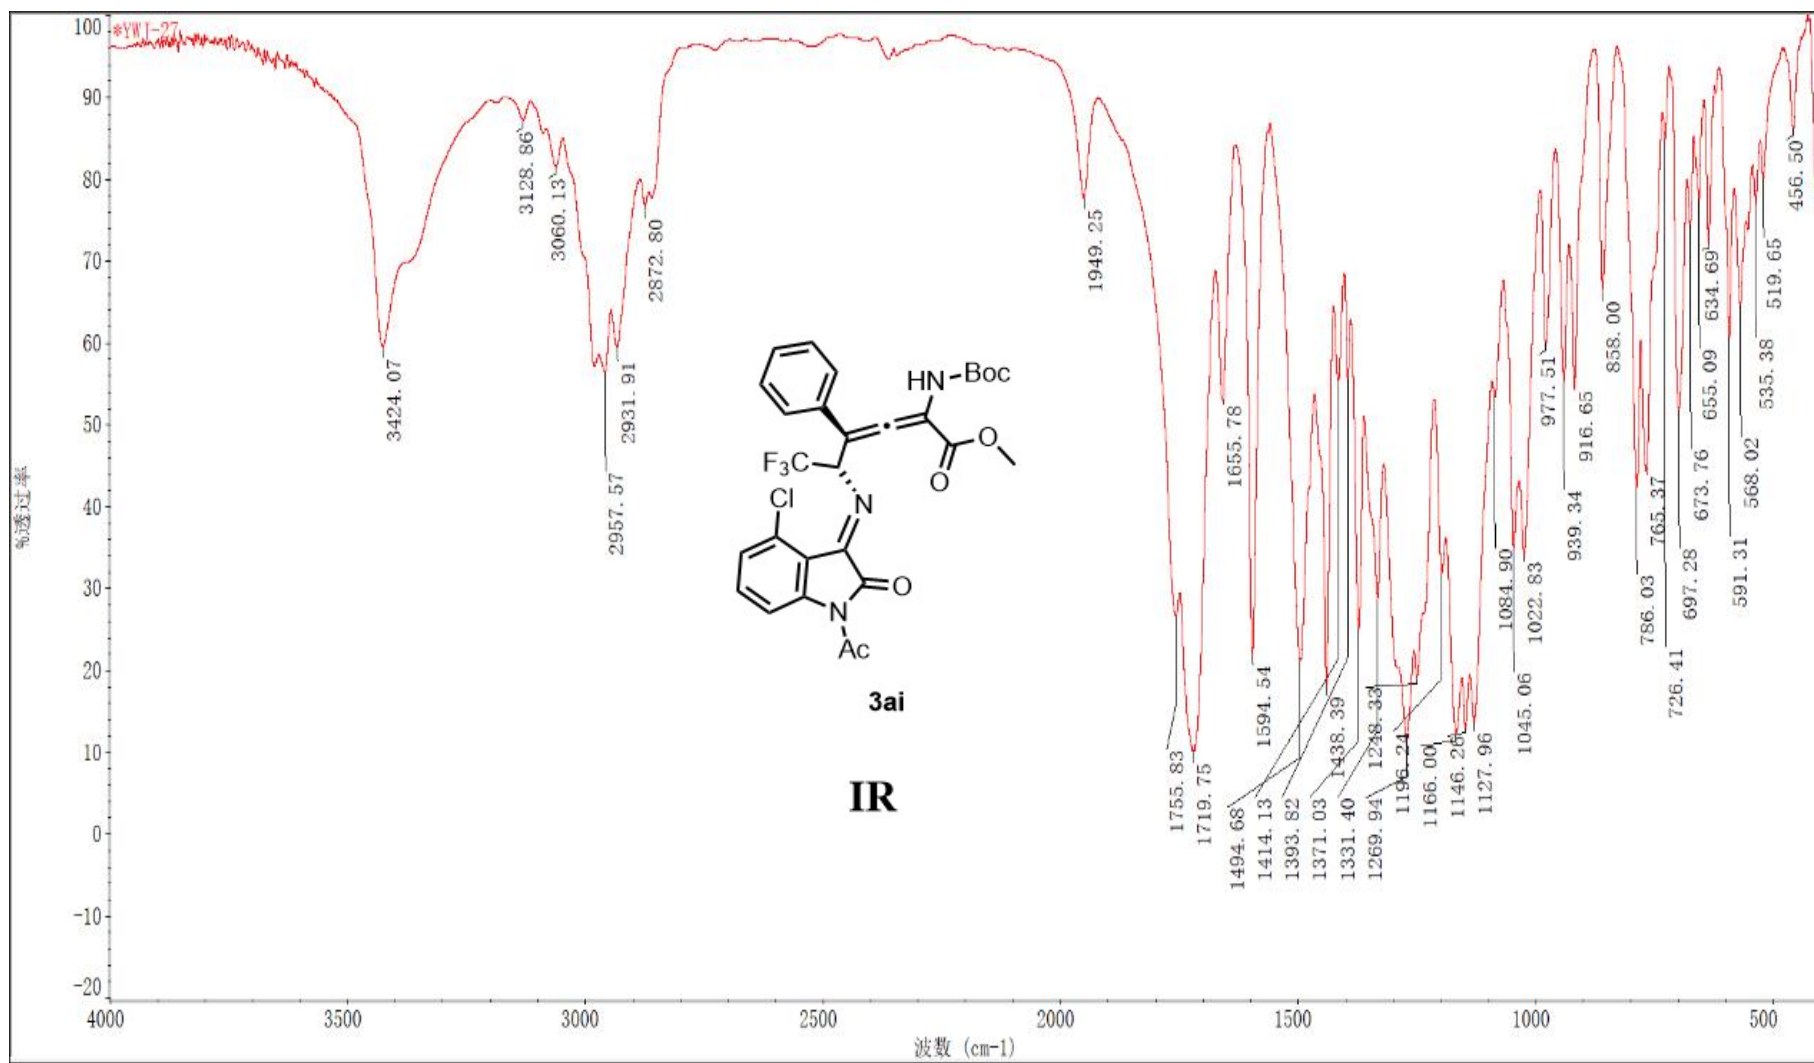

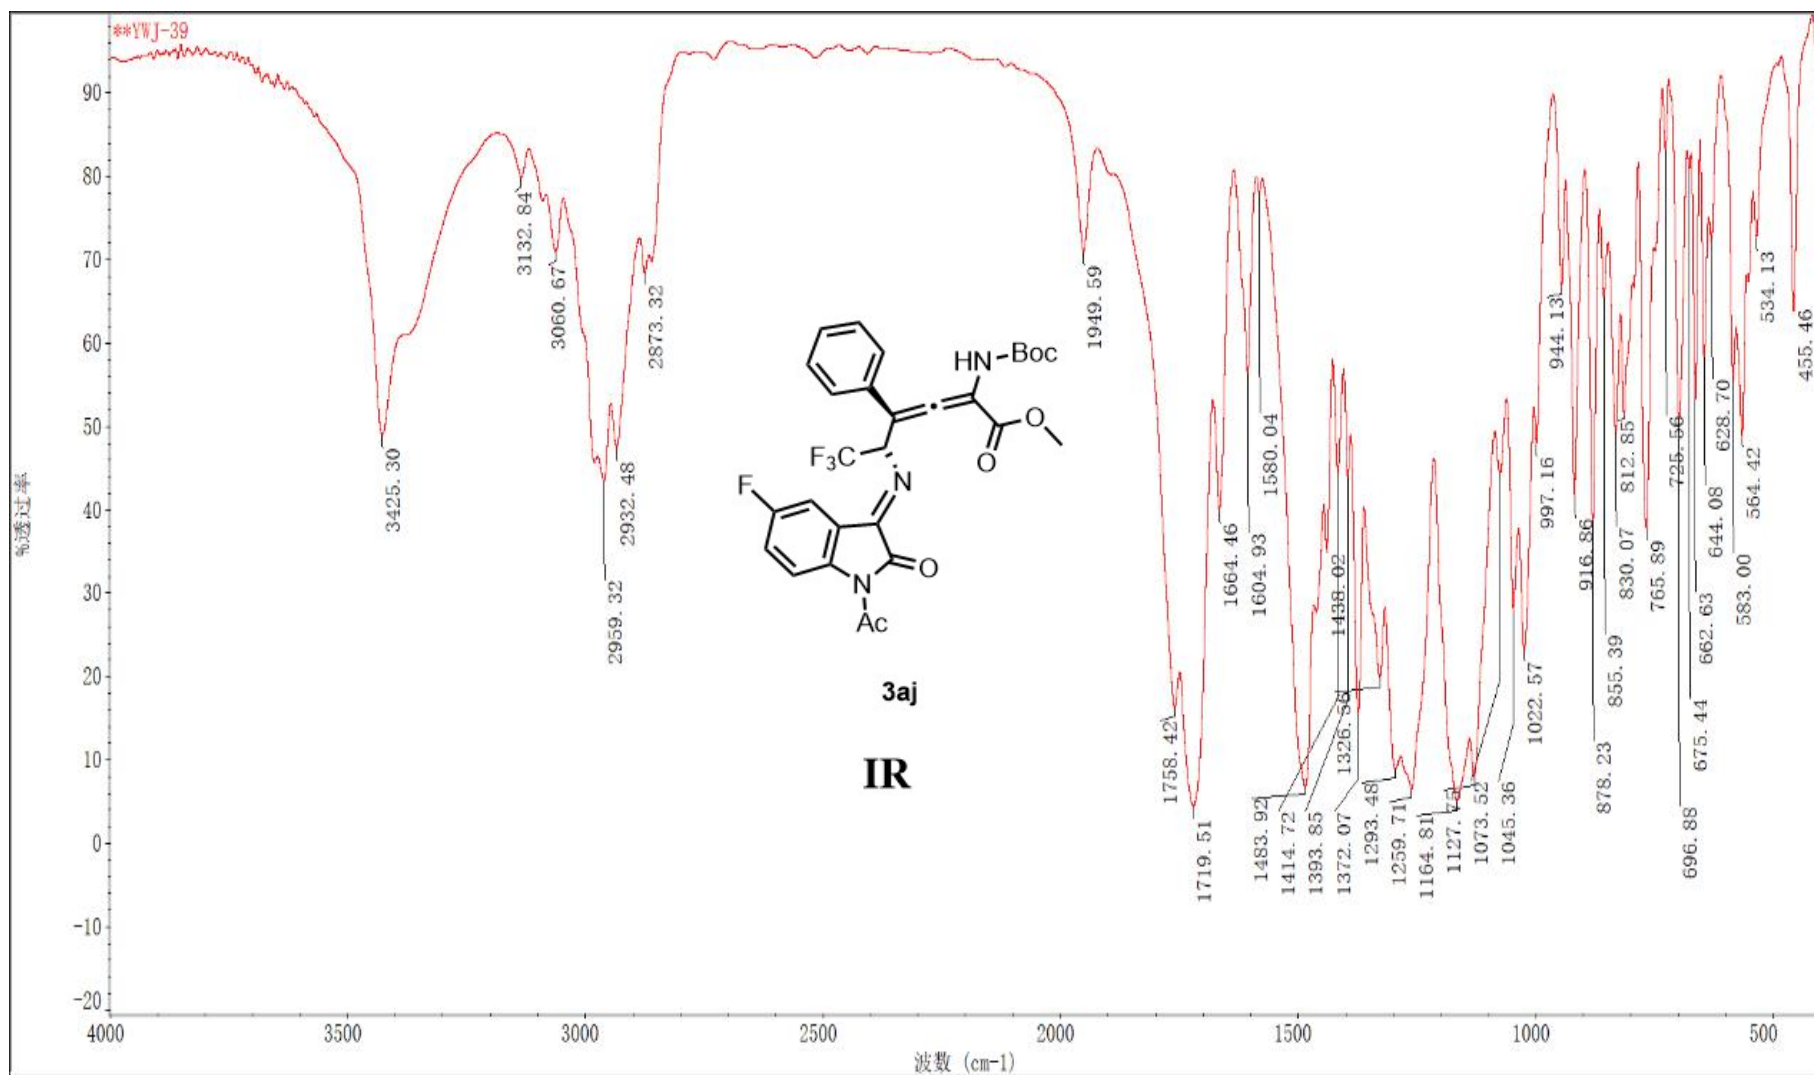

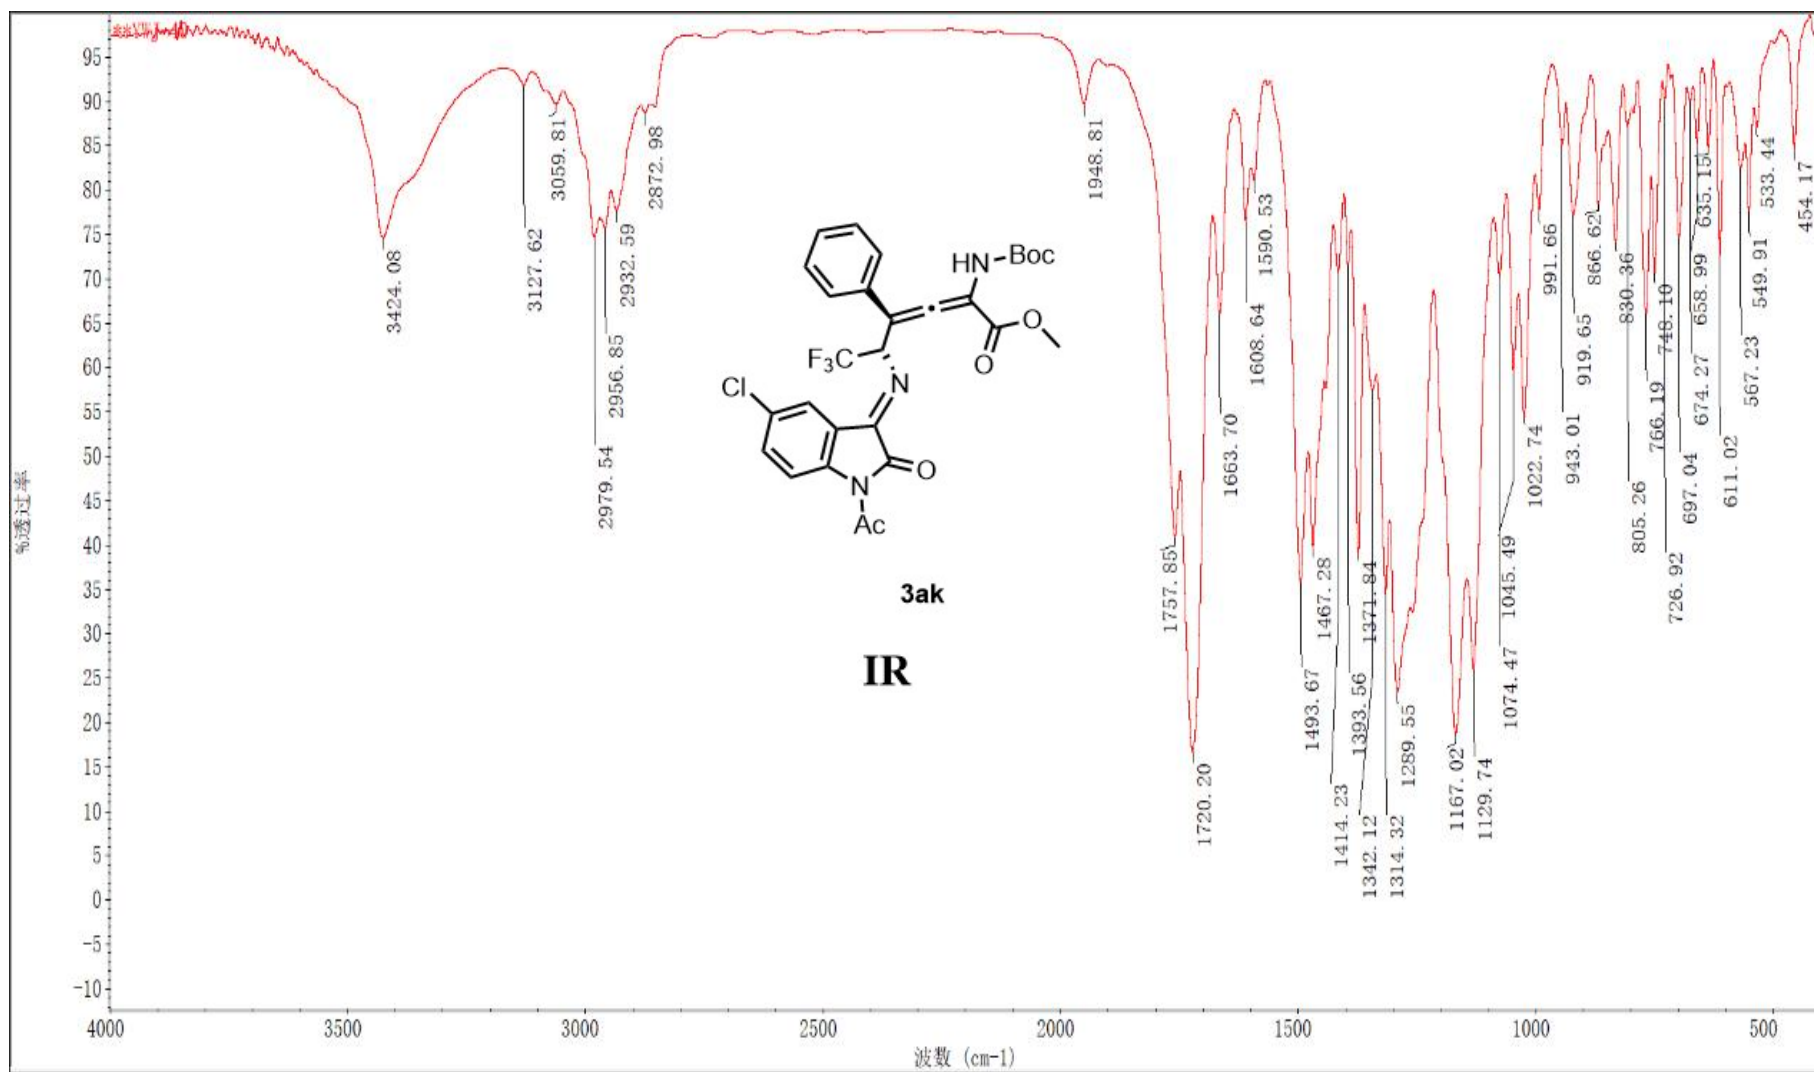

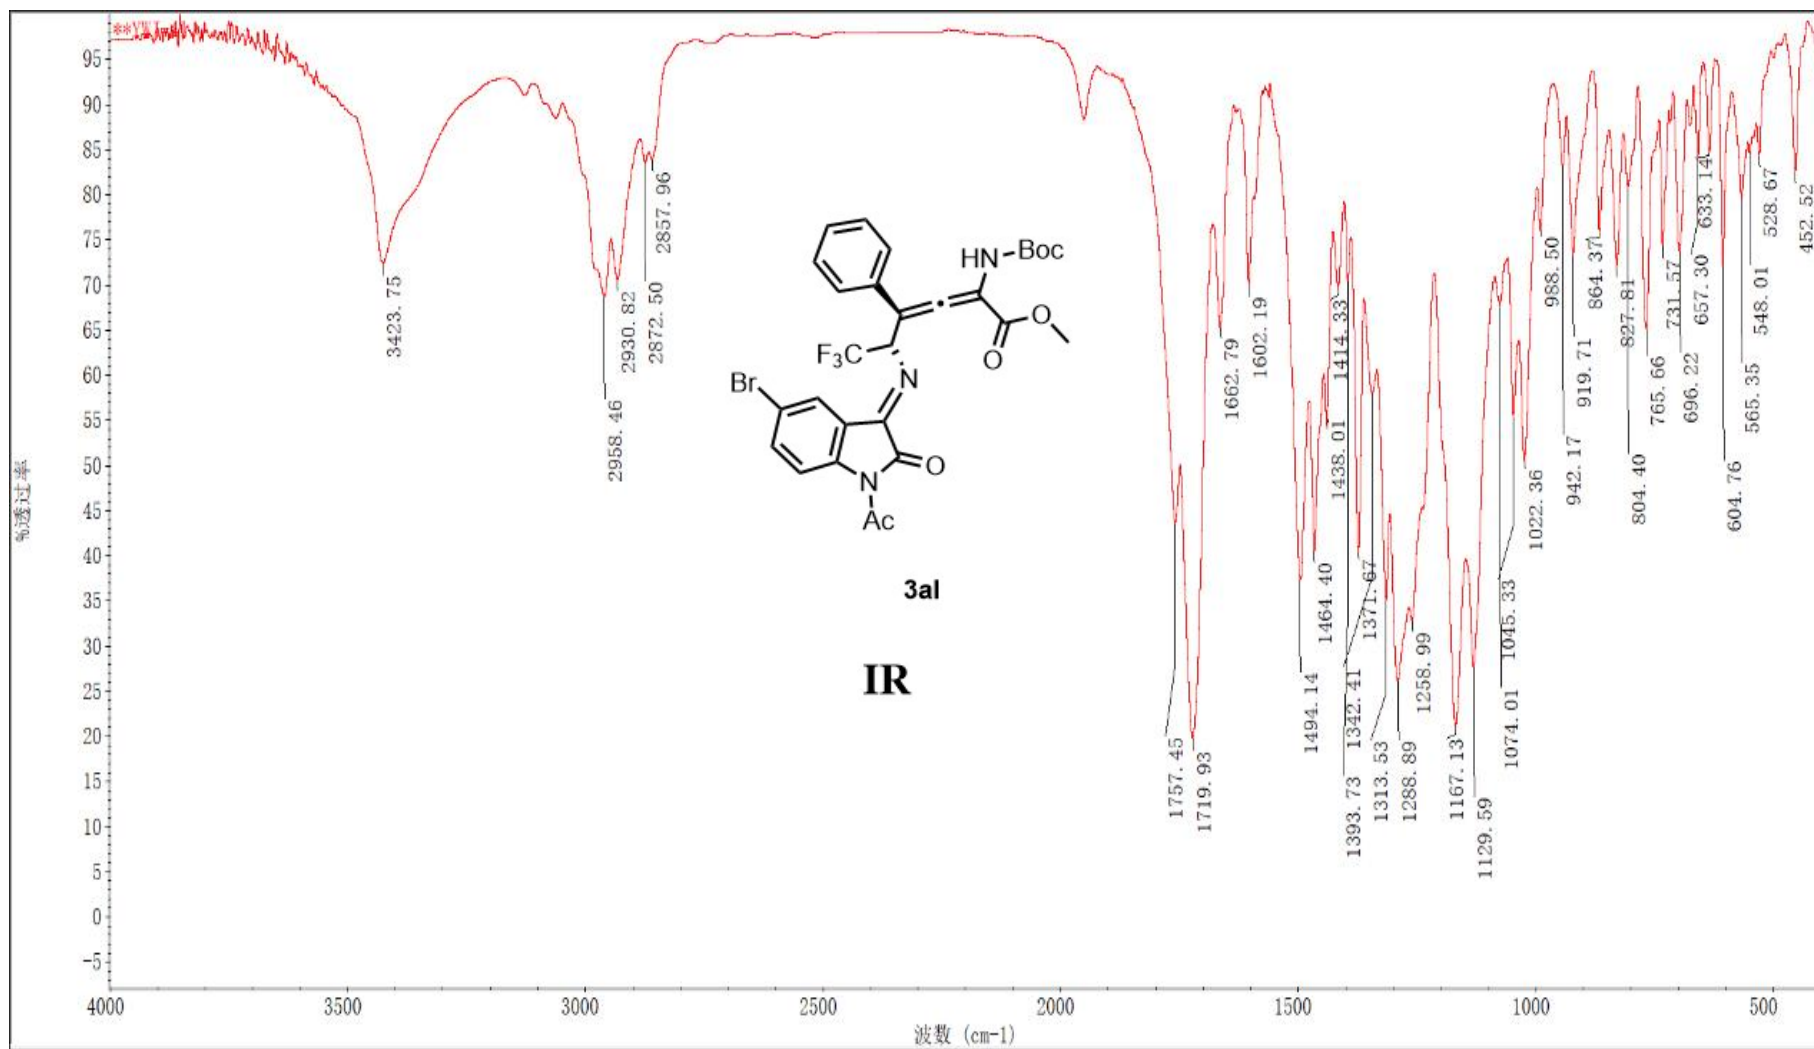

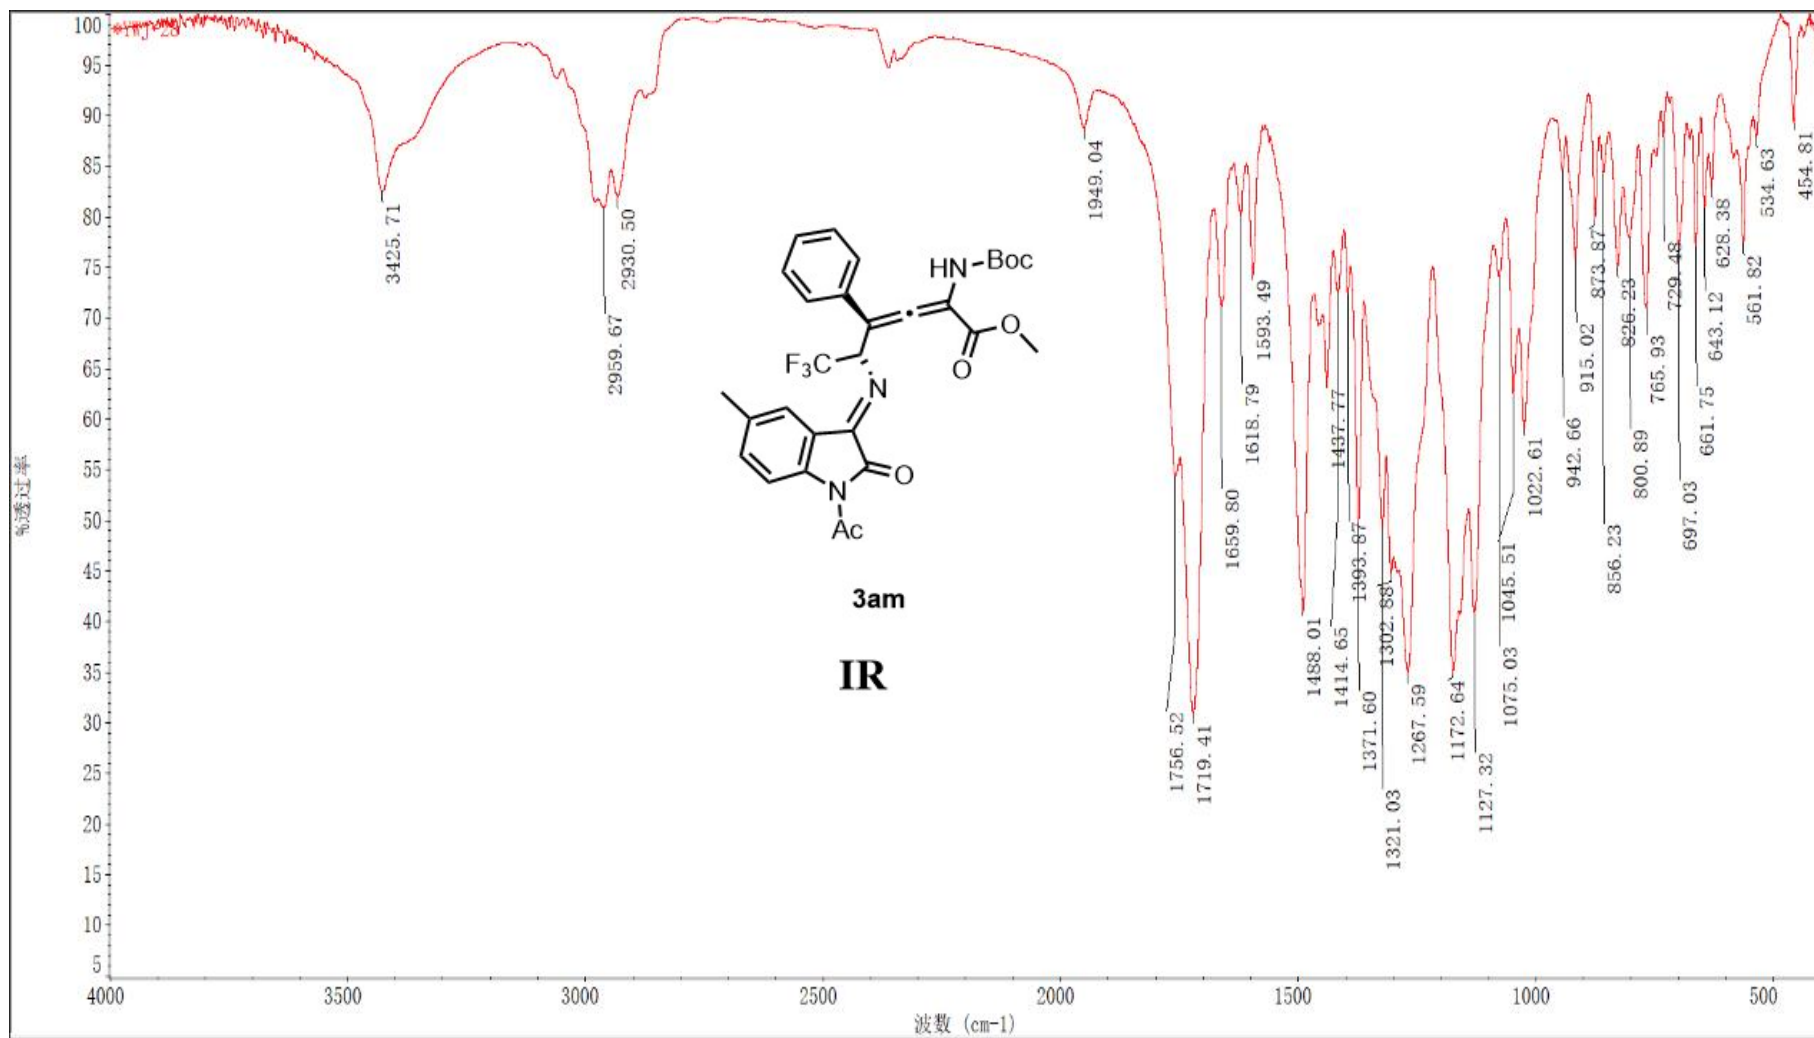

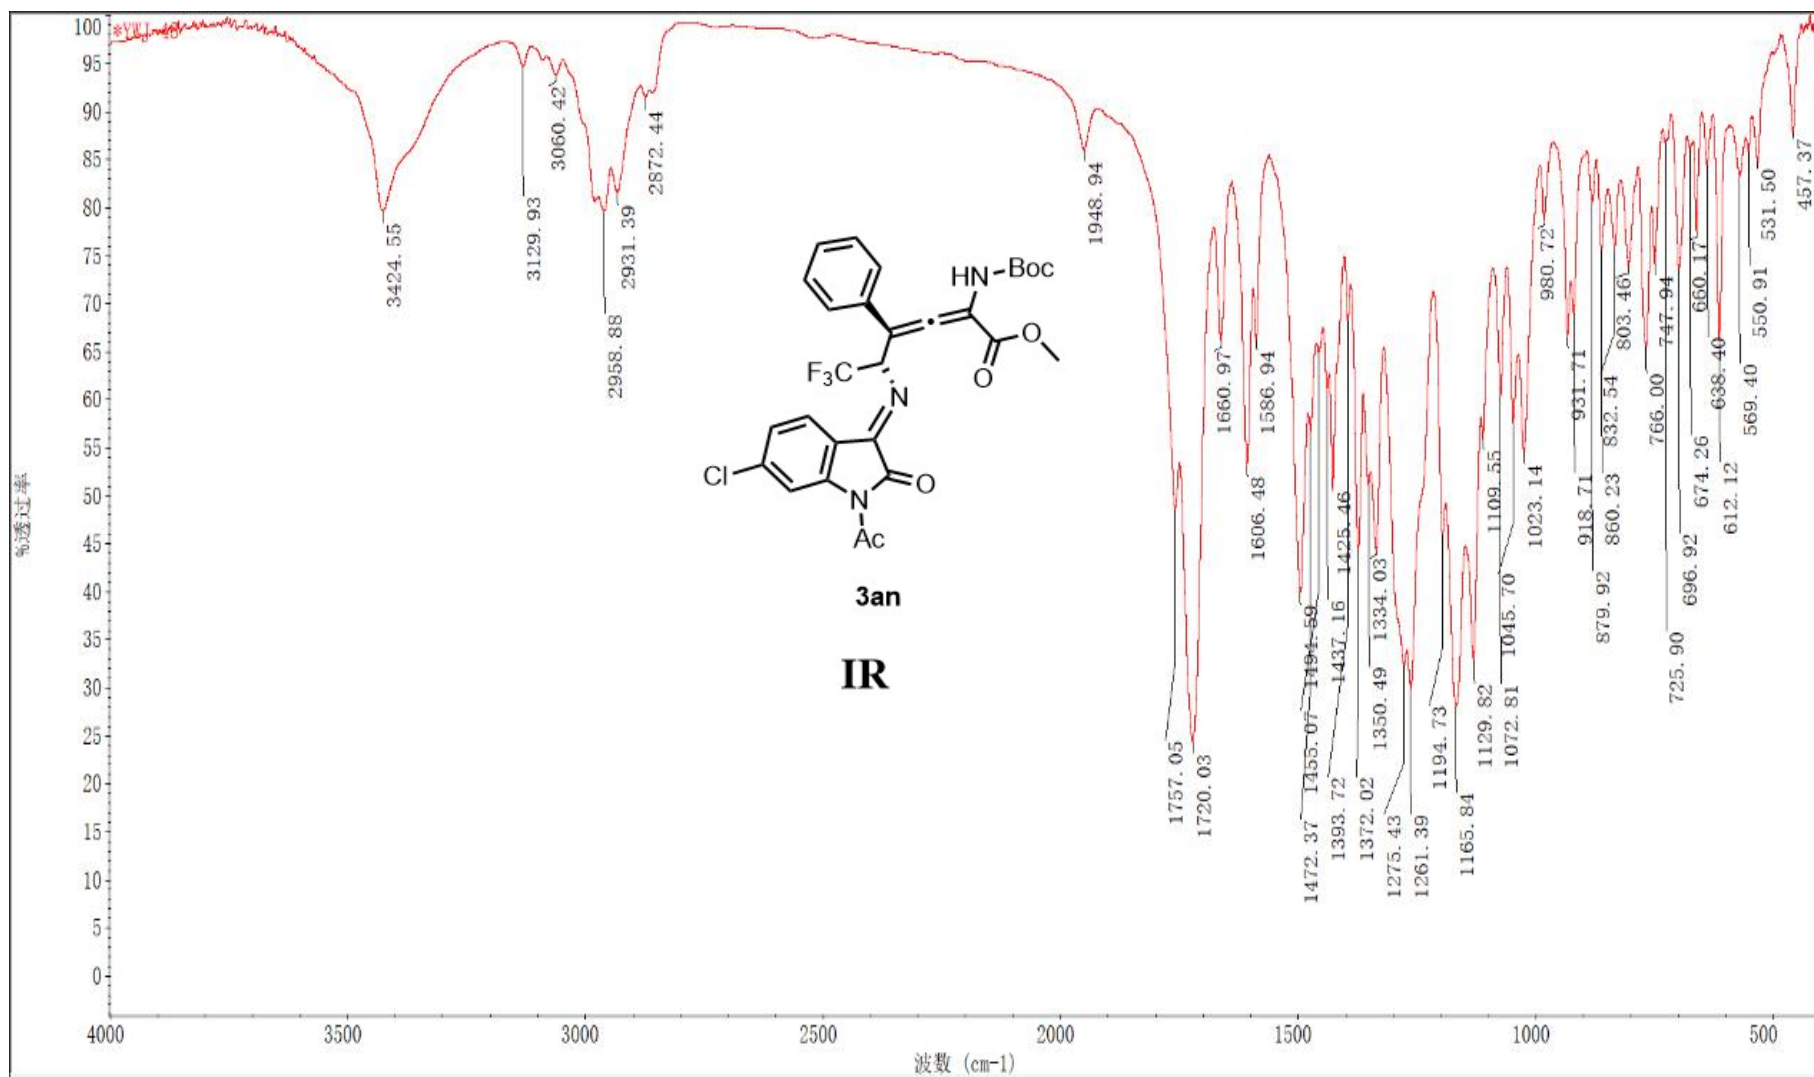



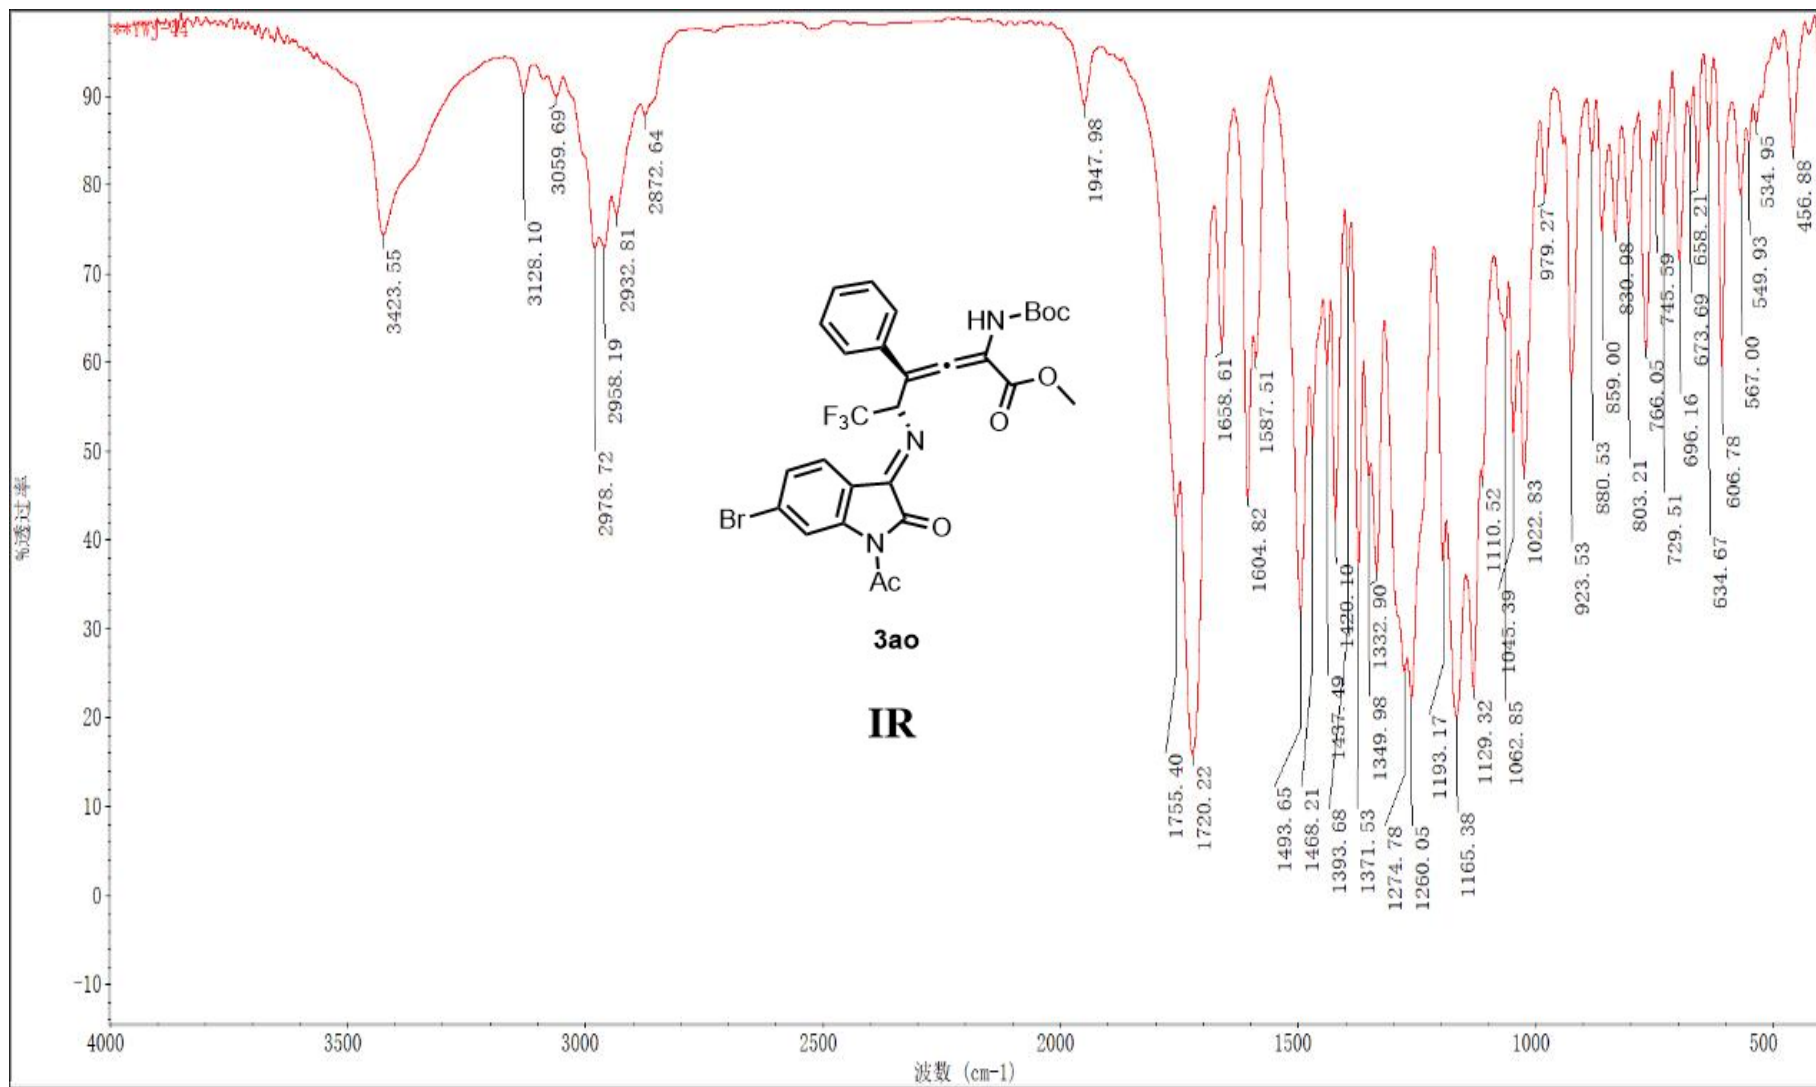

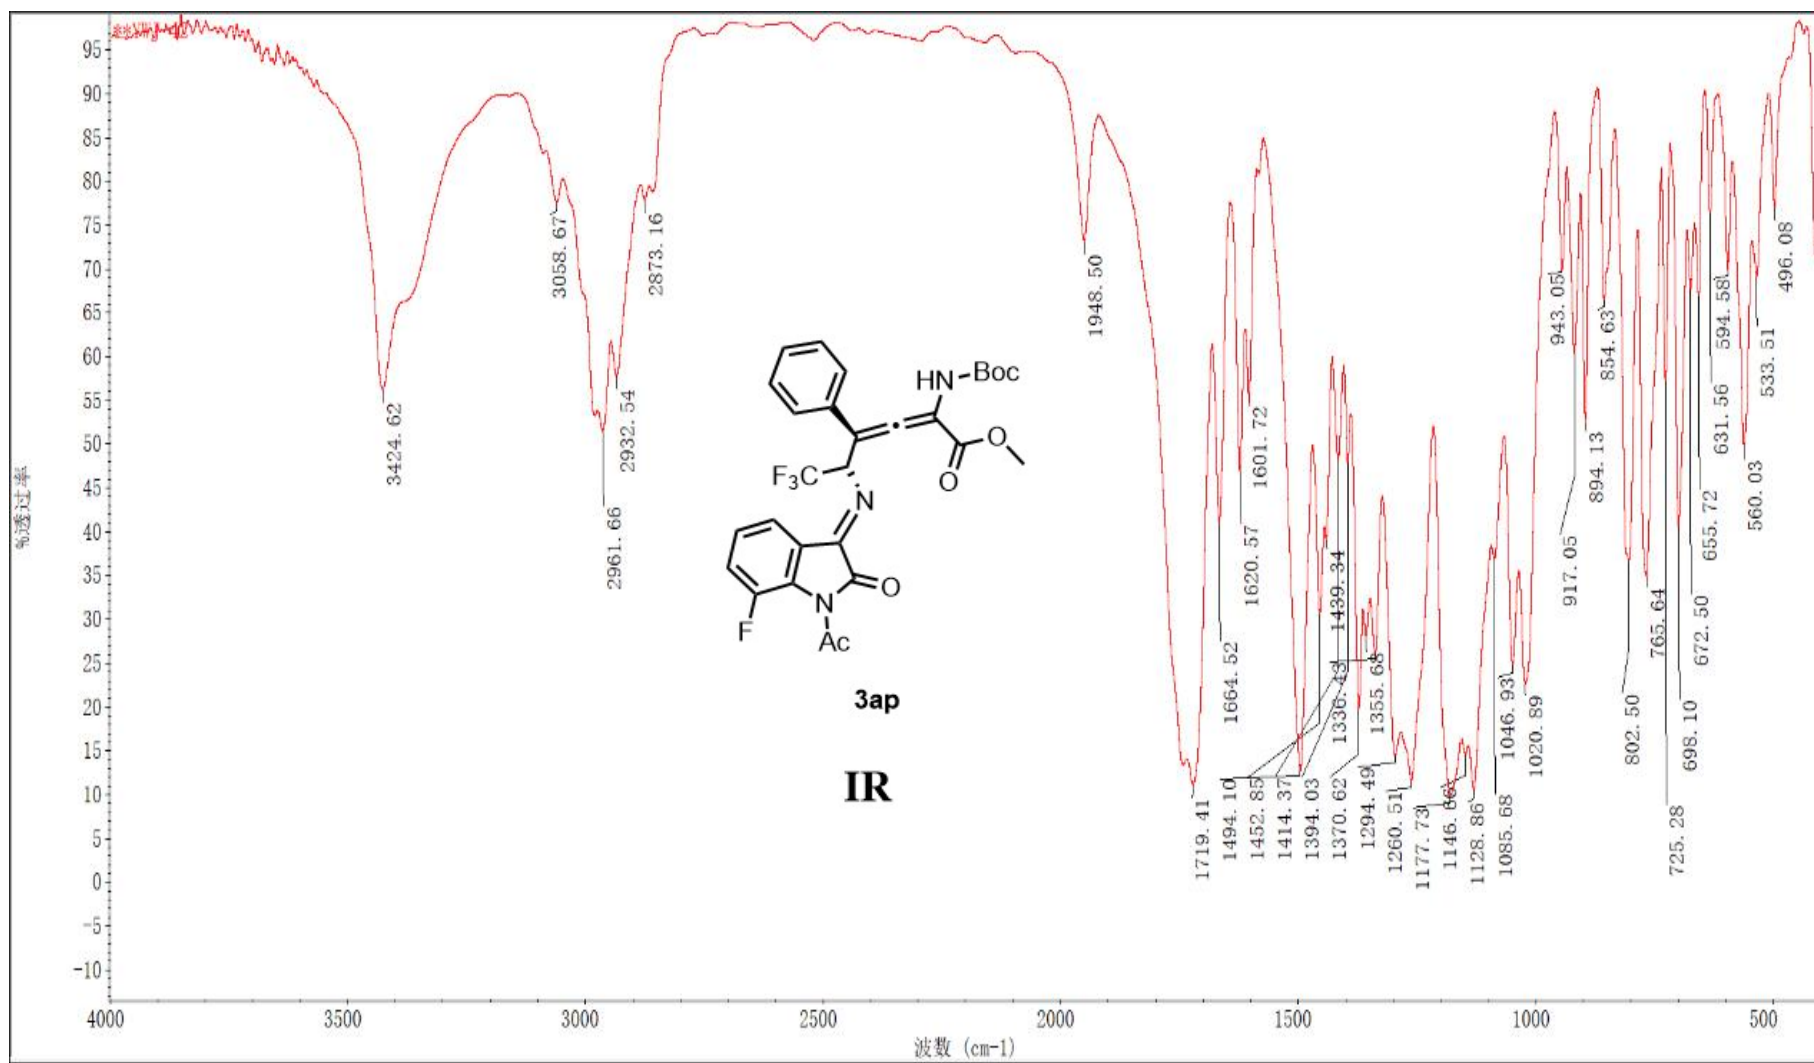

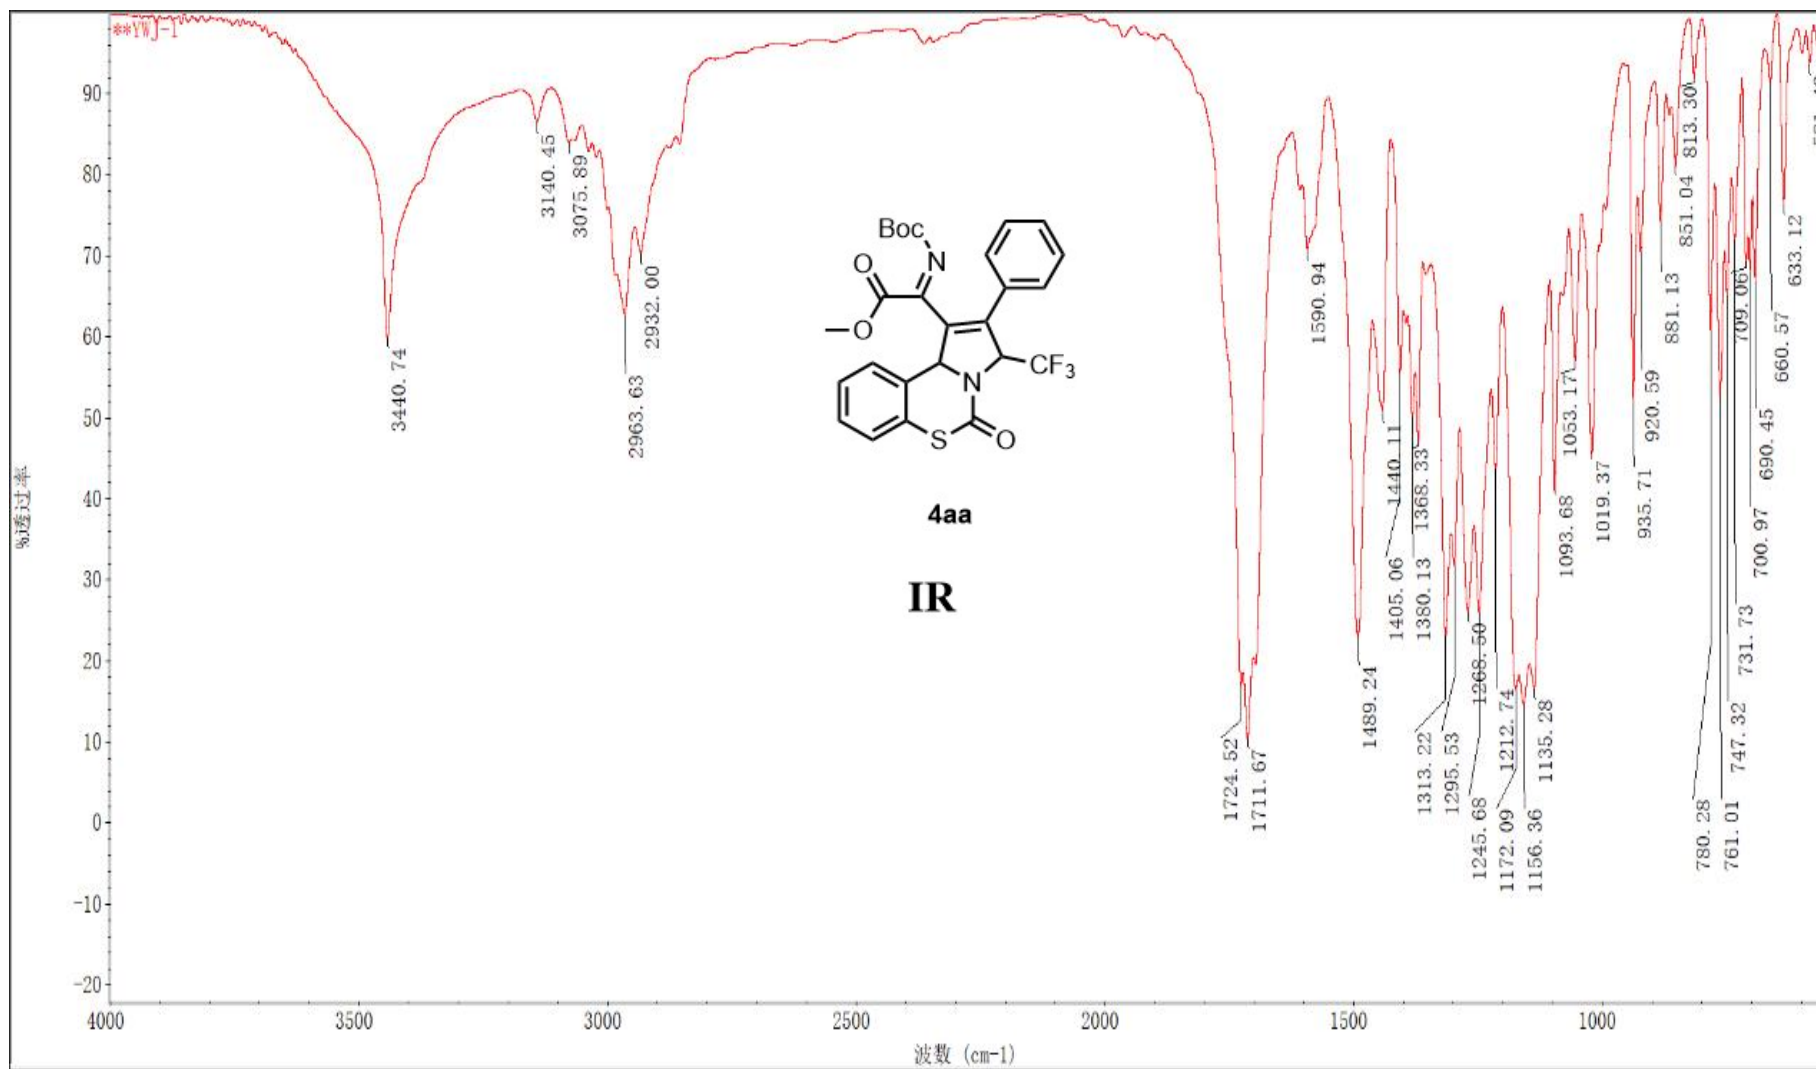

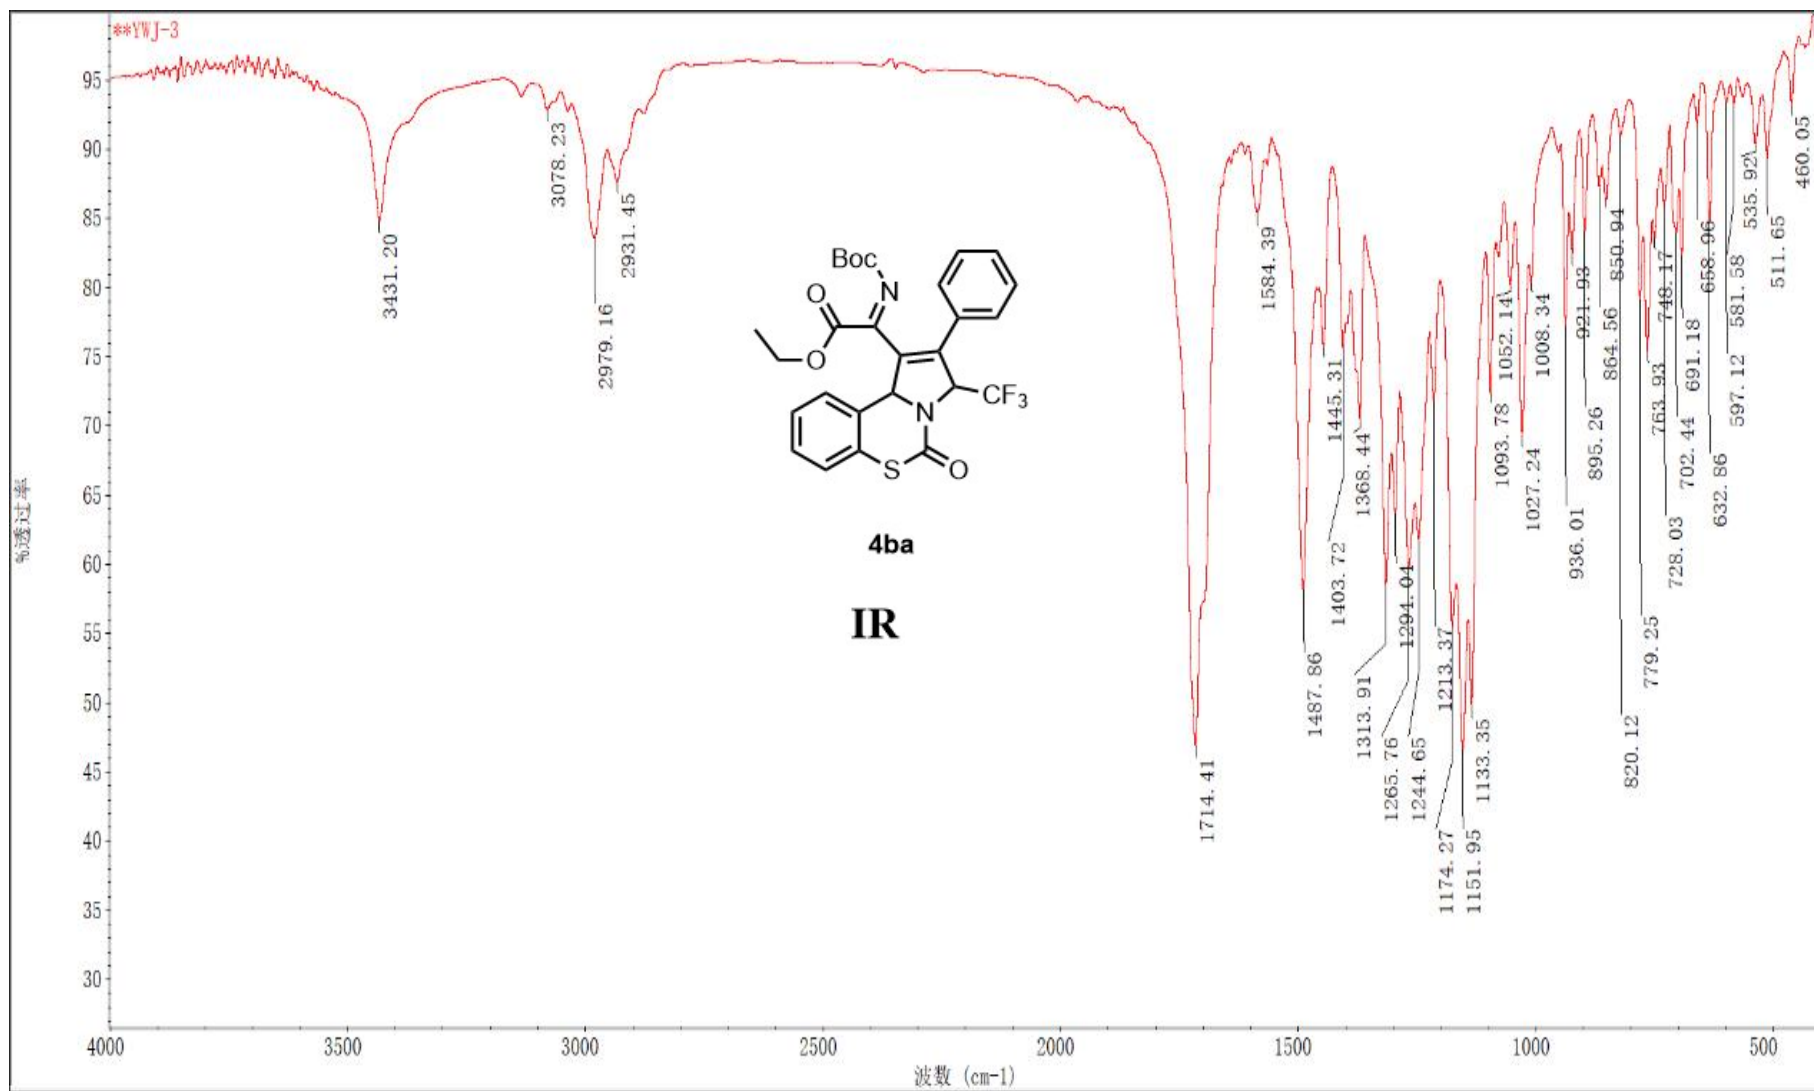

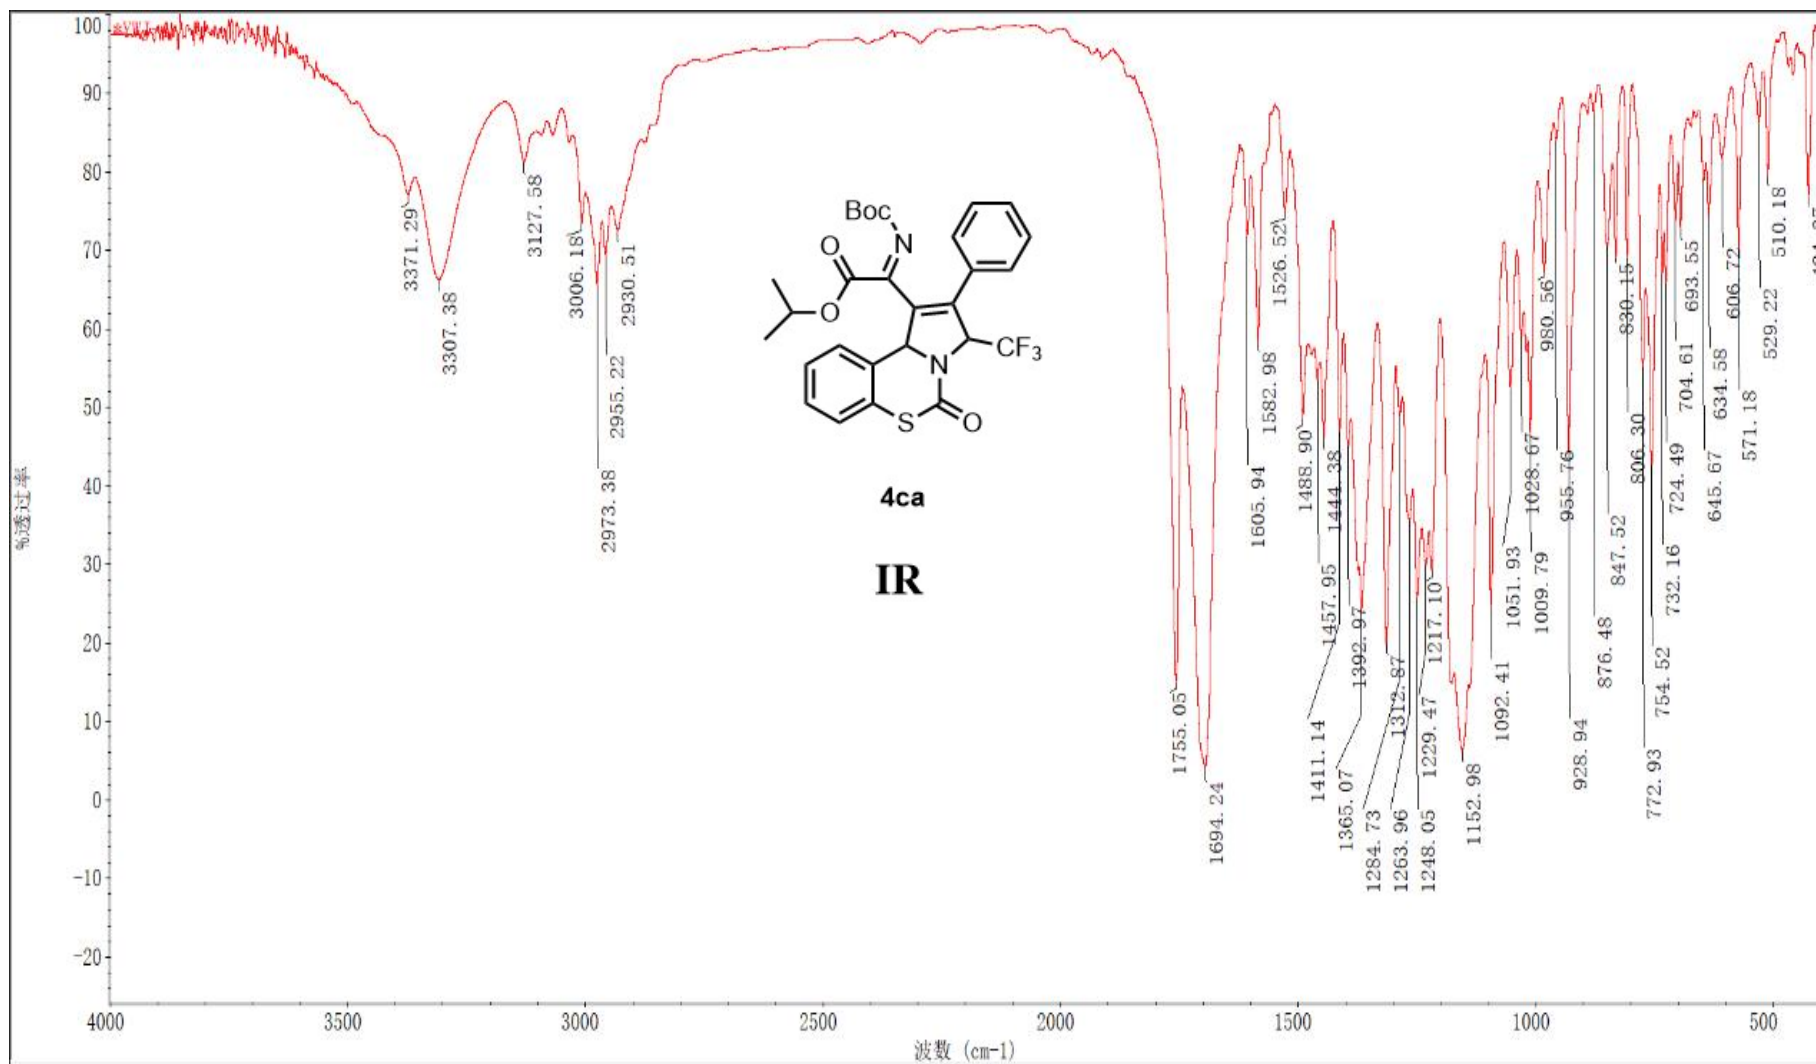

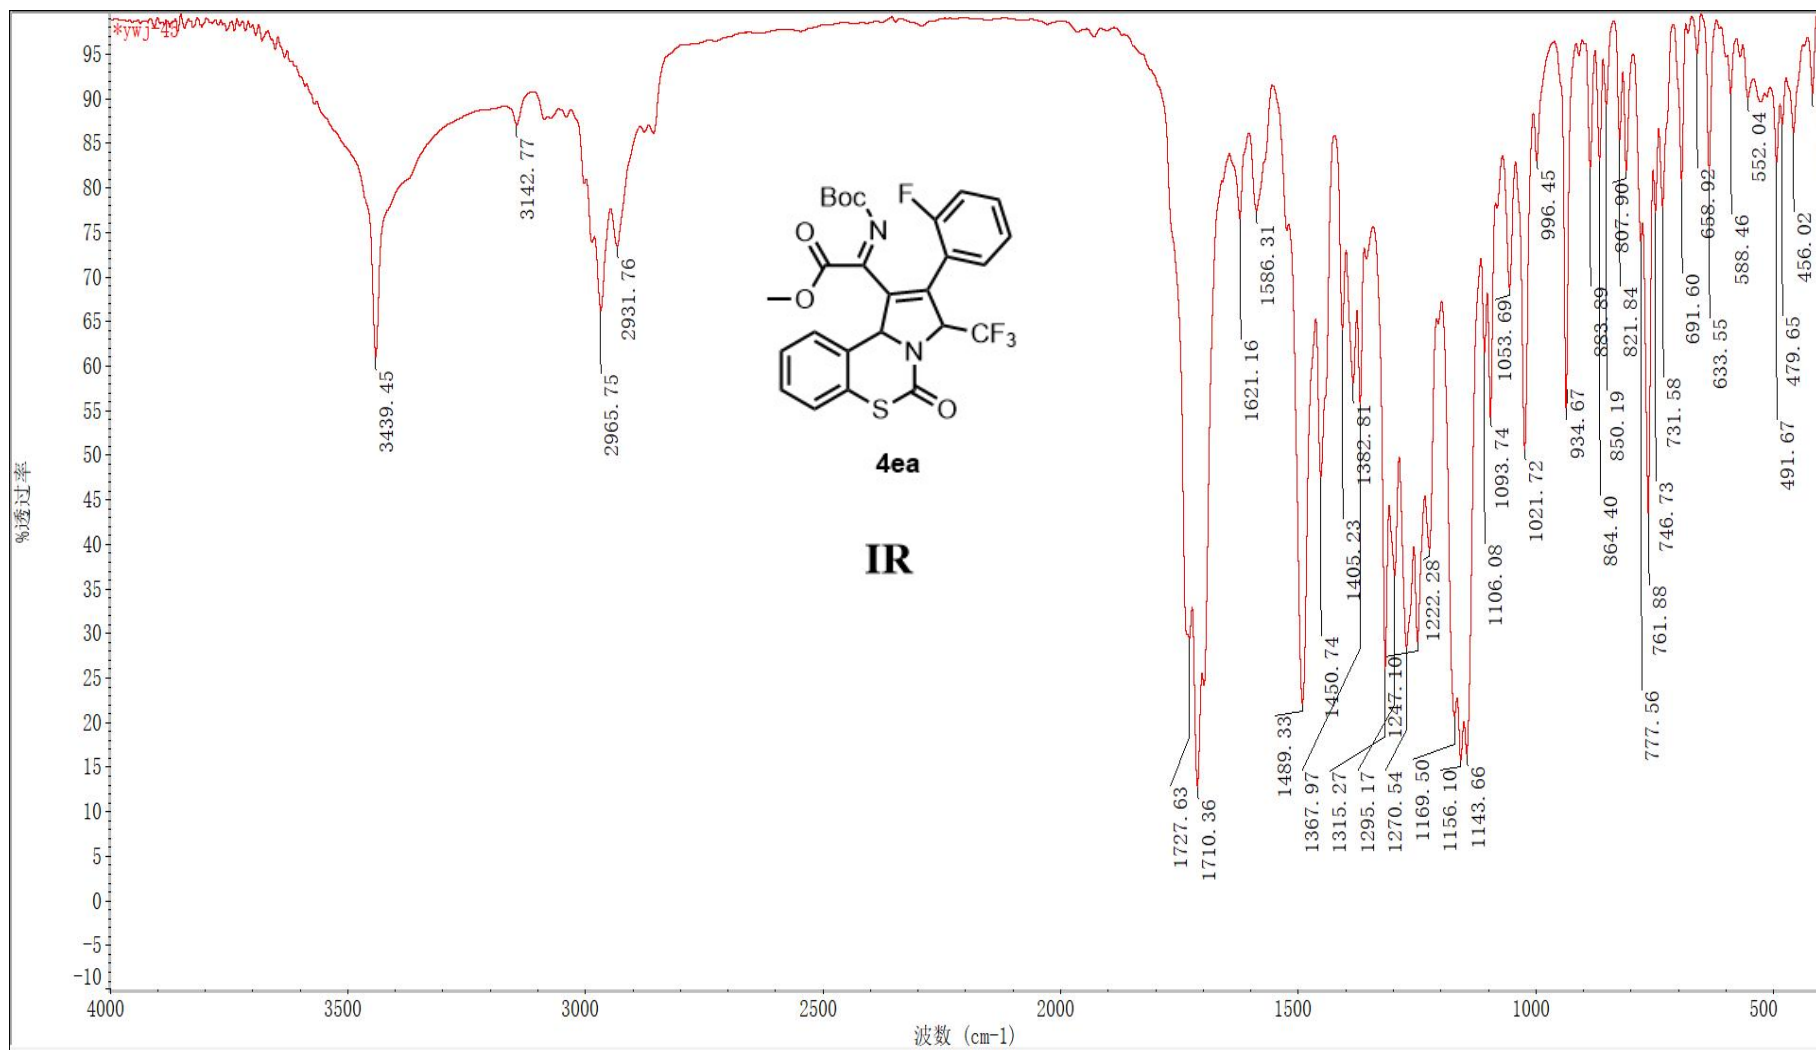

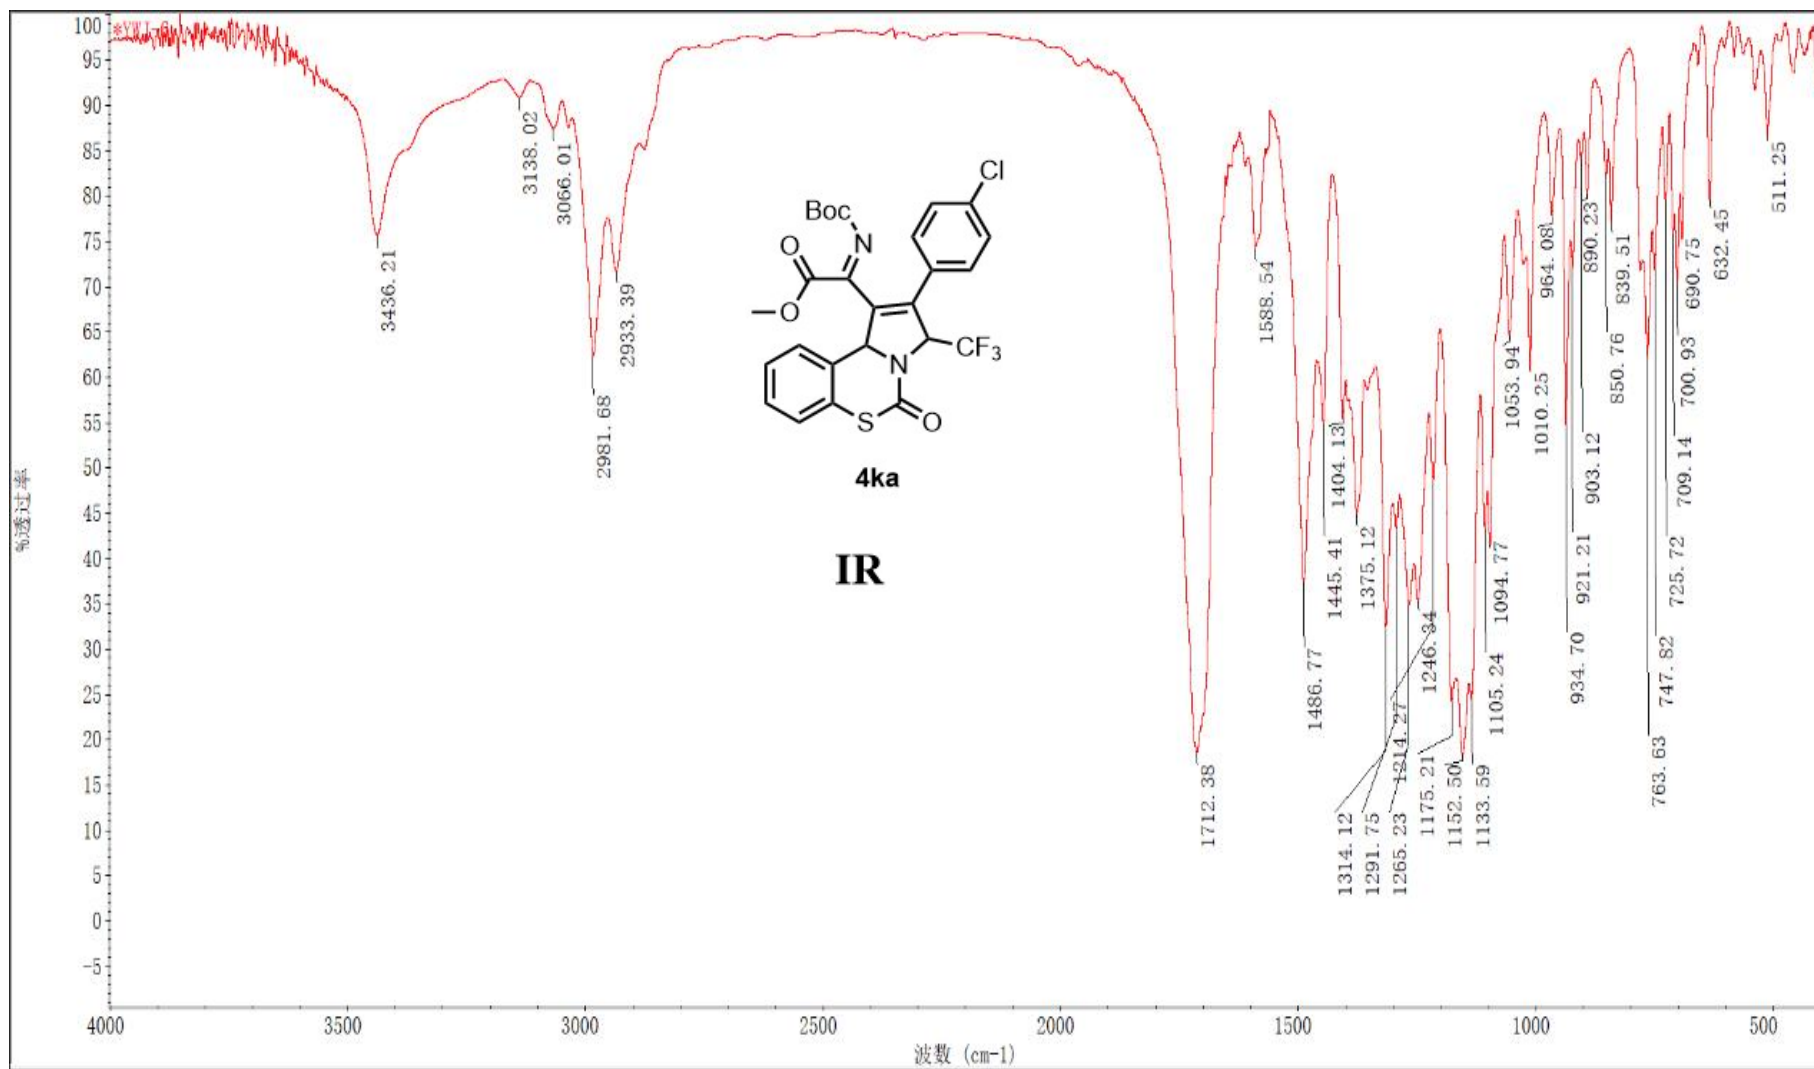

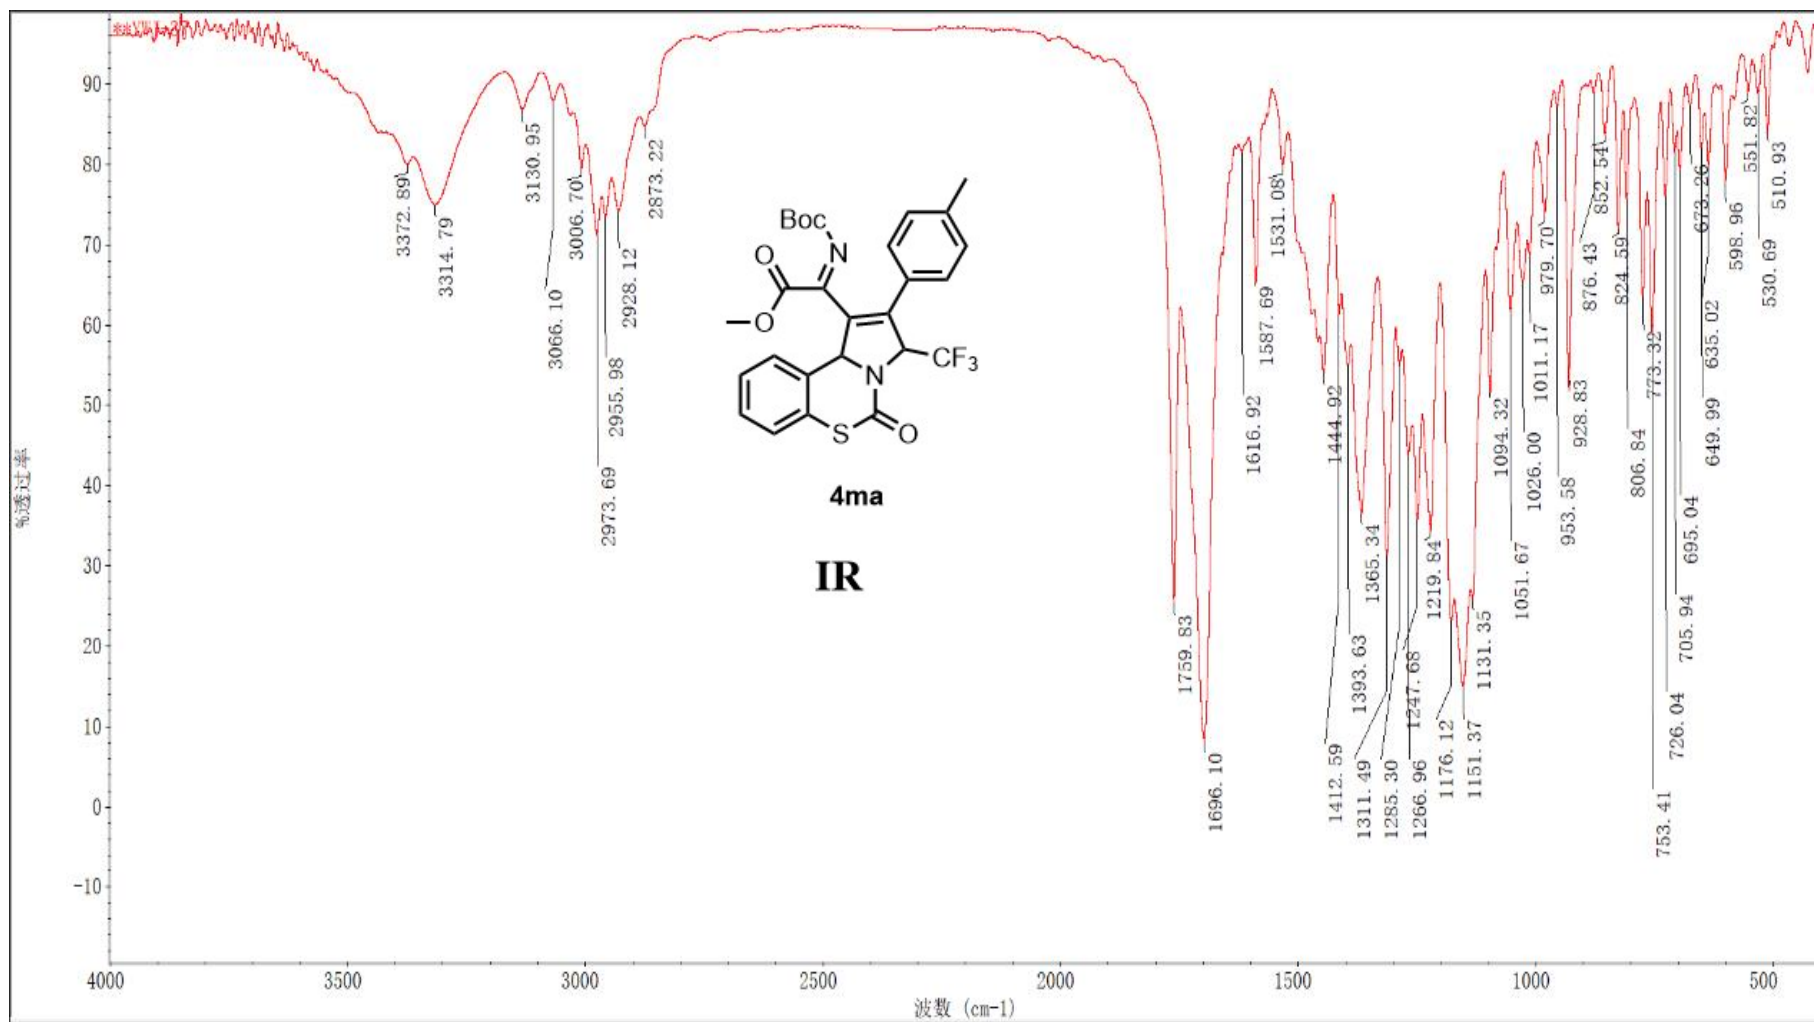



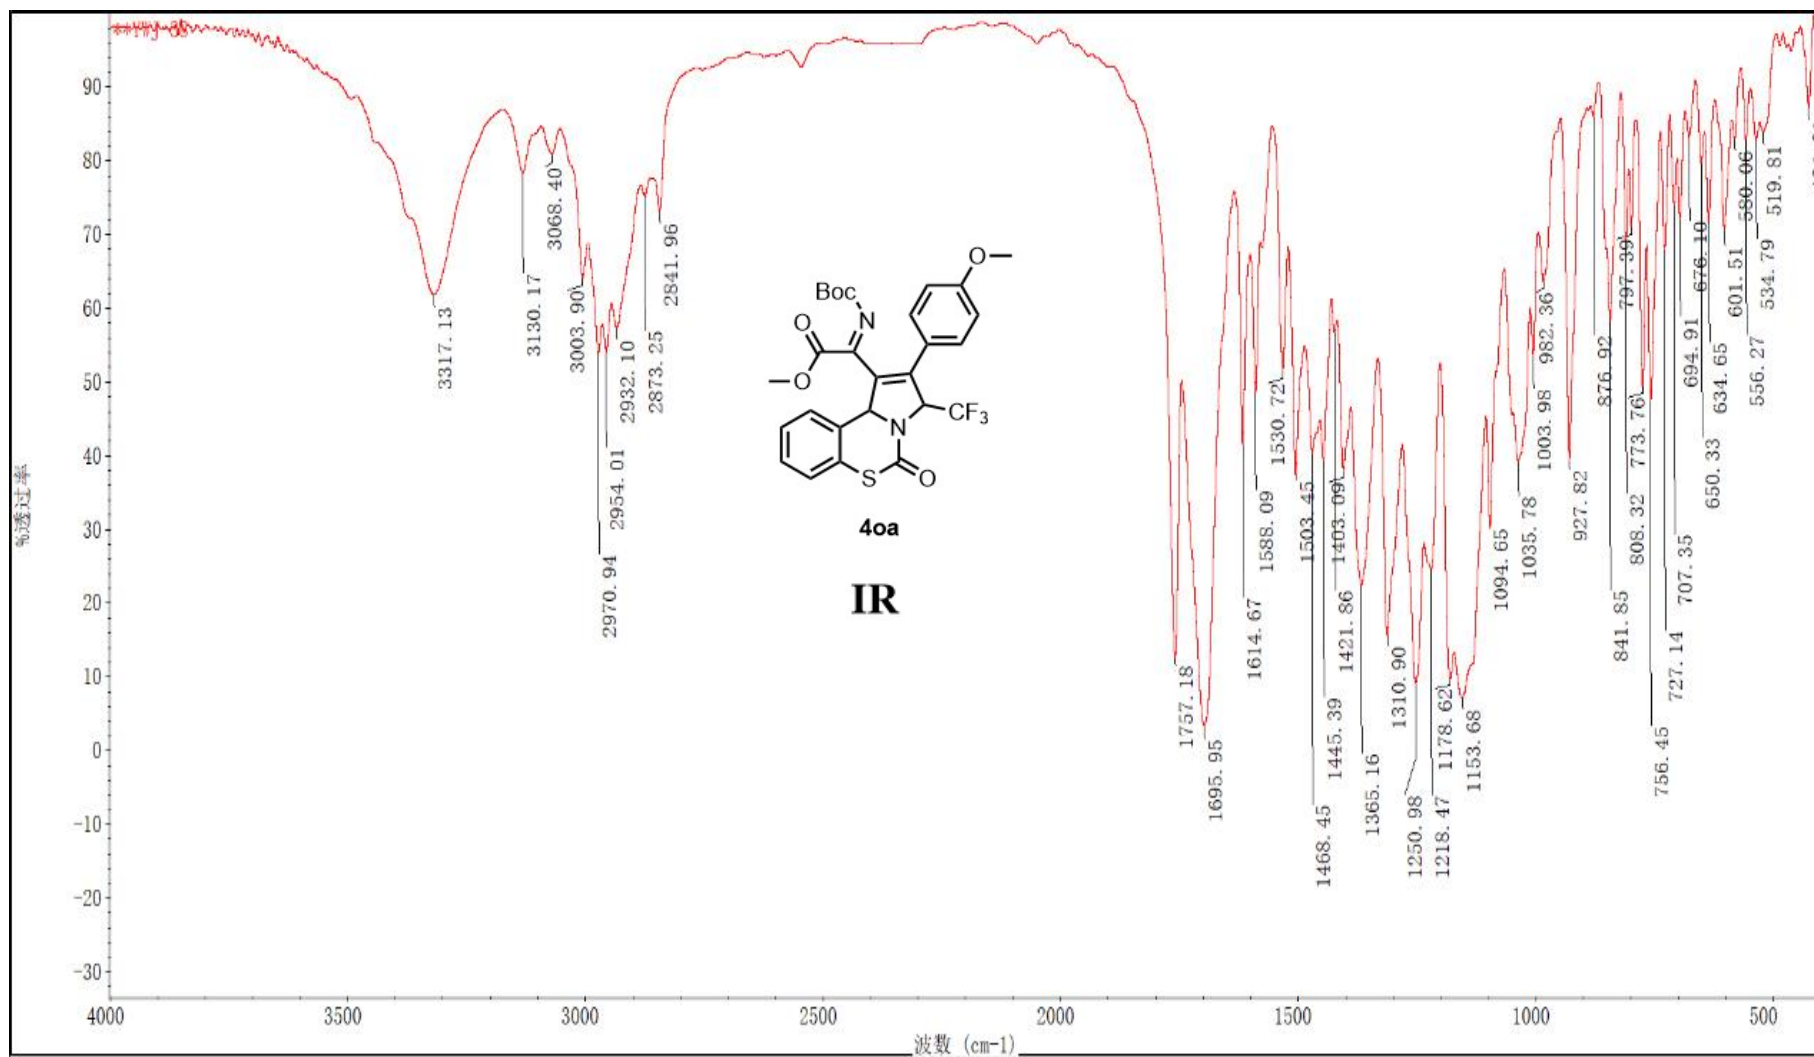

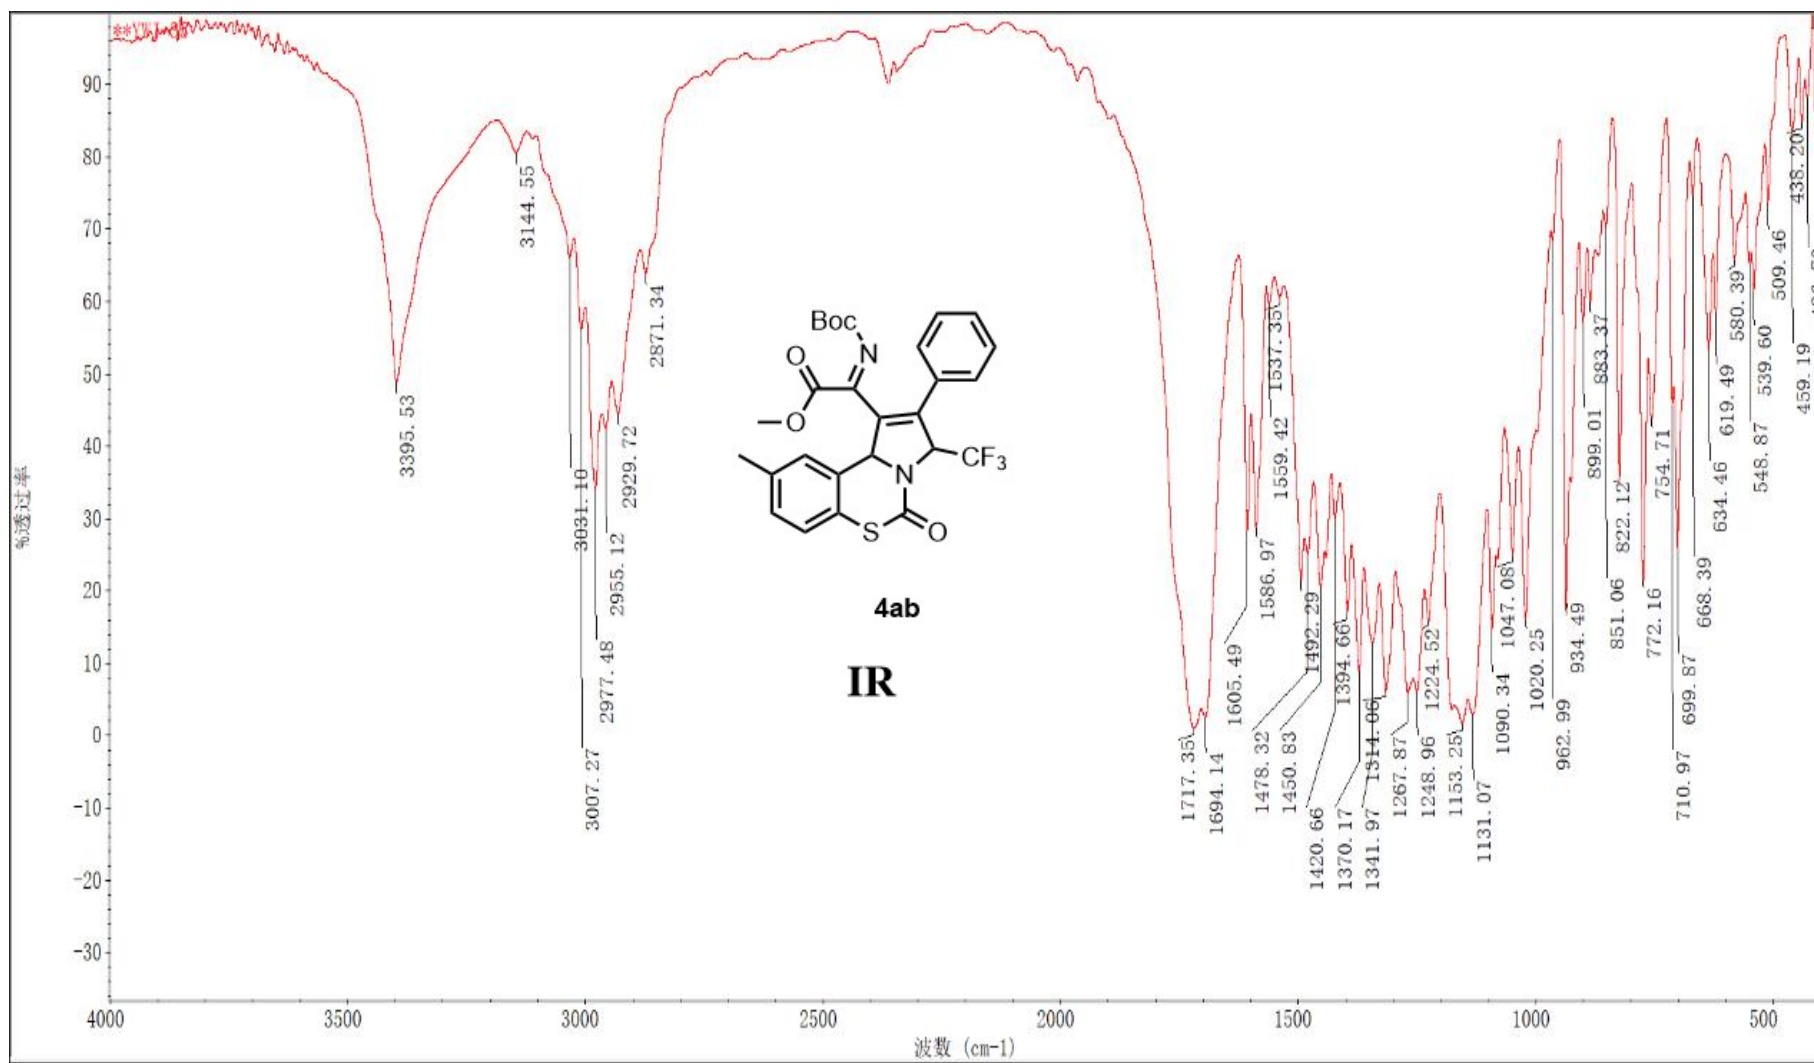

Supplement: d4cc03297g1.pdf [file d4cc03297g1.pdf]
